# Supplementary material for: Regulating the UAS/GAL4 system in adult Drosophila with Tet-off GAL80 transgenes
Source: PubMed Central journal article supplement (PMC5733373; doi:10.7717/peerj.4167), 2017-12-14
Supplement: peerj-05-4167-s001.pdf [file peerj-05-4167-s001.pdf]

|                                                                                                                       |           |
|-----------------------------------------------------------------------------------------------------------------------|-----------|
| 24B expression pattern during aging .....                                                                             | 3         |
| Methods .....                                                                                                         | 3         |
| Results .....                                                                                                         | 3         |
| <b>pDJ146 construction</b> .....                                                                                      | <b>4</b>  |
| pDJ136 subcloning .....                                                                                               | 4         |
| pDJ138 subcloning .....                                                                                               | 4         |
| pDJ140 subcloning .....                                                                                               | 5         |
| pDJ143 subcloning .....                                                                                               | 5         |
| pDJ146 subcloning .....                                                                                               | 5         |
| <b>pDJ147 construction</b> .....                                                                                      | <b>6</b>  |
| pDJ141 subcloning .....                                                                                               | 6         |
| pDJ144 subcloning .....                                                                                               | 6         |
| pDJ159 subcloning .....                                                                                               | 6         |
| pDJ160 subcloning .....                                                                                               | 6         |
| pDJ147 subcloning .....                                                                                               | 7         |
| <b>Quantification of tTA pre-adult expression</b> .....                                                               | <b>7</b>  |
| Methods .....                                                                                                         | 7         |
| Results .....                                                                                                         | 7         |
| <b>Midlife Induction</b> .....                                                                                        | <b>8</b>  |
| Methods .....                                                                                                         | 8         |
| Results .....                                                                                                         | 8         |
| <b>Kinetics of Reestablishment</b> .....                                                                              | <b>9</b>  |
| Methods .....                                                                                                         | 9         |
| Results .....                                                                                                         | 10        |
| <b>References</b> .....                                                                                               | <b>11</b> |
| <b>Supplemental figures</b> .....                                                                                     | <b>12</b> |
| Supplemental Figure 1: 24B GAL4-driven UAS-lacZ expression pattern during aging at 25° C. ....                        | 13        |
| Supplemental Figure 2: Construction of pDJ136. ....                                                                   | 14        |
| Supplemental Figure 3: Construction of pDJ138. ....                                                                   | 15        |
| Supplemental Figure 4: Construction of pDJ139. ....                                                                   | 16        |
| Supplemental Figure 5: Construction of pDJ140. ....                                                                   | 17        |
| Supplemental Figure 6: Construction of pDJ143. ....                                                                   | 18        |
| Supplemental Figure 7: Construction of pDJ146. ....                                                                   | 19        |
| Supplemental Figure 8: Construction of pDJ141. ....                                                                   | 20        |
| Supplemental Figure 9: Construction of pDJ144. ....                                                                   | 21        |
| Supplemental Figure 10: Construction of pDJ159. ....                                                                  | 22        |
| Supplemental Figure 11: Construction of pDJ160. ....                                                                  | 23        |
| Supplemental Figure 12: Construction of pDJ147. ....                                                                  | 24        |
| Supplemental Figure 13: Grim lethality assay of 1 copy DJ146 insertion treated with ampicillin. ....                  | 25        |
| Supplemental Figure 14: Grim lethality assay of 1 copy DJ146 insertion treated with ampicillin and tetracycline. .... | 26        |
| Supplemental Figure 15: Grim lethality assay of 1 copy DJ147 insertion treated with ampicillin. ....                  | 27        |
| Supplemental Figure 16: Grim lethality assay of 1 copy DJ147 insertion treated with ampicillin and tetracycline. .... | 28        |
| Supplemental Figure 17: Grim lethality assay of 2 copies of DJ146 insertion treated with ampicillin. ....             | 29        |

|                                                                                                                                                             |            |
|-------------------------------------------------------------------------------------------------------------------------------------------------------------|------------|
| Supplemental Figure 18: Grim lethality assay of 2 copies of DJ146 insertion treated with ampicillin and tetracycline.....                                   | 30         |
| Supplemental Figure 19: Grim lethality assay of 2 copies of DJ147 insertion treated with ampicillin. ....                                                   | 31         |
| Supplemental Figure 20: Grim lethality assay of 2 copies of DJ147 insertion treated with ampicillin and tetracycline.....                                   | 32         |
| Supplemental Figure 21: Grim lethality assay of 1 copy of DJ147 insertion and 1 copy of DJ146 insertion treated with ampicillin. ....                       | 33         |
| Supplemental Figure 22: Grim lethality assay of 1 copy of DJ147 insertion and 1 copy of DJ146 insertion treated with ampicillin and tetracycline. ....      | 34         |
| Supplemental Figure 23: Grim lethality assay of 3 copies of DJ146 insertion treated with ampicillin. ....                                                   | 35         |
| Supplemental Figure 24: Grim lethality assay of 3 copies of DJ146 insertion treated with ampicillin and tetracycline.....                                   | 36         |
| Supplemental Figure 25: Grim lethality assay of 1 copy of DJ147 insertion and 2 copies of DJ146 insertion treated with ampicillin. ....                     | 37         |
| Supplemental Figure 26: Grim lethality assay of 1 copy of DJ147 insertion and 2 copies of DJ146 insertion treated with ampicillin and tetracycline. ....    | 38         |
| Supplemental Figure 27: Grim lethality assay of 4 copies of DJ146 insertion treated with ampicillin. ....                                                   | 39         |
| Supplemental Figure 28: Grim lethality assay of 3 copies of DJ147 insertion treated with ampicillin and tetracycline.....                                   | 40         |
| Supplemental Figure 29: Grim lethality assay of 2 copies of DJ147 insertion and 2 copies of DJ146 insertion treated with ampicillin. ....                   | 41         |
| Supplemental Figure 30: Grim lethality assay of 2 copies of DJ147 insertion and 2 copies of DJ146 insertion treated with ampicillin and tetracycline. ....  | 42         |
| Supplemental Figure 31: Relief of repression of GAL4 transcriptional activity by GAL80, as measured by grim lethality assay in the presence of inducer..... | 43         |
| Supplemental Figure 32: DJ146 and DJ147 tTA transcriptional activity during development measured using a tetO-lacZ reporter. ....                           | 44         |
| Supplemental Figure 33: GAL4 transcriptional activity in 2x146 + 2x147 flies that were fed tetracycline starting at 20 days of age. ....                    | 45         |
| Supplemental Figure 34: Tissue distribution of lacZ expression in 30 days old flies fed 0 or 100µg/ ml of tetracycline beginning at 20 days of age.....     | 46         |
| Supplemental Figure 35: Kinetics of reestablishing repression of GAL4 transcriptional activity.....                                                         | 47         |
| <b>Supplemental tables</b> .....                                                                                                                            | <b>48</b>  |
| Supplemental Table 1: UAS-grim lethality assay data set. ....                                                                                               | 48         |
| Supplemental Table 2: UAS-grim lethality assay statistical analysis (t-tests).....                                                                          | 59         |
| Supplemental Table 3: UAS-grim lethality assay statistical analysis (t-tests).....                                                                          | 78         |
| Supplemental Table 4: UAS-lacZ assay L1 data set. ....                                                                                                      | 80         |
| Supplemental Table 5: UAS-lacZ assay L3 data set. ....                                                                                                      | 97         |
| Supplemental Table 6: UAS-lacZ assay EP data set. ....                                                                                                      | 115        |
| Supplemental Table 7: UAS-lacZ assay LP data set. ....                                                                                                      | 133        |
| Supplemental Table 8: UAS-lacZ assay statistical analysis (t-tests).....                                                                                    | 151        |
| Supplemental Table 9: Repression ability of 2x146 + 2x147 in adults fed through life. ....                                                                  | 154        |
| Supplemental Table 10: Induction abilities of 2x146 + 2x147 in adults fed through life. ....                                                                | 155        |
| Supplemental Table 11: Repression ability of 2x146 + 2x147 in adults fed starting at 20 days old.....                                                       | 156        |
| Supplemental Table 12: Induction abilities of 2x146 + 2x147 in adults fed starting at 20 days old. ....                                                     | 157        |
| Supplemental Table 13: GAL4 driver survey data set. ....                                                                                                    | 158        |
| <b>Reagents table</b> .....                                                                                                                                 | <b>176</b> |

## 24B expression pattern during aging

### *Methods*

Experimental animals were obtained from a cross between the  $w[*]; P\{w[+mC]=UAS-lacZ.B\}Bg4-2-4b$  (Bloomington stock 1777) and the  $w[*]; P\{w[+mW.hs]=GawB\}how[24B]$  (Bloomington stock 1767) strains. Negative control animals were obtained from a cross between the  $w[*]; P\{w[+mC]=UAS-lacZ.B\}Bg4-2-4b$  and a  $w[*]$  strain. Age-synchronized male and female cohorts (25-30 individuals per vial) were collected from the resulting progenies under nitrogen anesthesia. Cohorts were kept at 25°C and transferred to vials with fresh food at least twice a week. CPRG and X-gal assays were performed as described in the main text.

### *Results*

A quantitative analysis of 24B GAL4 expression during aging was performed by measuring  $\beta$ -galactosidase activity with the CPRG assay as a function of age (Supplemental Figure 1A). The results show that the expression is the highest during the first 24h after emergence before dropping by half at 3 days and remaining constant afterward. The profile of expression is extremely similar between genders. The same analysis yielded enzyme activities mostly between 2000 and 7500  $\Delta mOD/min/fly$  for the DJ694 driver (Seroude *et al.* 2002) and between 500 and 1600  $\Delta mOD/min/fly$  for the MHC driver in absence of RU486 inducer (Poirier *et al.* 2008). With an activity mostly around 2000  $\Delta mOD/min/fly$ , the 24B driver is expressing the second highest level of GAL4 in aging flies.

X-gal-stained cryo-sections were generated to determine the localization of 24B GAL4 expression in adults as a function of age (Supplemental Figure 1B). No staining could be detected in the negative control animals (data not shown). In freshly eclosed males, GAL4 is expressed in all muscle tissues but a lower level of expression is evident in the flight muscles. GAL4 is also expressed in the salivary glands and in the abdominal fat but no expression is visible in the nervous and digestive systems. At all subsequent ages examined, the

expression in muscle tissues has decreased and is almost absent in the flight muscles except for a subset of the vertical indirect wing muscles. The loss of expression in the flight muscles is therefore mainly responsible for the drop in expression observed with the CPRG assay. It is worth noting that GAL4 expression is also visible in the testis and most oenocytes although the expression in the later is almost absent in the oldest animals tested.

### **pDJ146 construction**

#### *pDJ136 subcloning*

The pTub-GAL80 plasmid (Lee and Luo 1999) was used as a PCR template with the DJ111 (5'-GAAAAGATACTTGAGGTTTCG-3') and DJ112 (5'-GTCAGAATTCTCTAGAGCAACATGGACTACAACAAG-3') primers to obtain a 365bp fragment containing the 5' end of the GAL80 coding region as well as introducing *EcoRI* and *XbaI* restriction sites upstream of the start codon (Supplemental Figure 2). After *EcoRI* digestion, the PCR fragment was ligated to the 9445bp *EcoRI* fragment from pTub-GAL80 to obtain the 9777bp pDJ136 plasmid. The orientation of the insert and the structure of the plasmid were determined by *XbaI* digestion. The sequences amplified during the PCR were sequenced with DJ111 and DJ112. This strategy removed the *tubulin 1a* promoter sequences from the pTub-GAL80 and allows the excision of the complete GAL80 coding region with *XbaI*.

#### *pDJ138 subcloning*

The GAL80 coding region from pDJ136 was inserted into the pJY2000 (Stebbins and Yin 2001) using *XbaI* to create the 12853bp pDJ138 plasmid (Supplemental Figure 3). The orientation of the insert and the structure of the plasmid were determined by *BglII* digestion. This plasmid has the GAL80 coding region with  $\beta$ -globin poly A signals under the control of a *TetO* promoter surrounded by the *scs* and *scs'* chromatin boundaries elements.



#### *pDJ139 subcloning*

A linker containing multiple restriction sites was generated from blunting the product obtained by hybridizing the DJ117 (5'-AGTCTAGATAAGATCTGAGCTCTCCGCGGATGCGGCCGCTAGAA-3') and DJ118 (5'-ATATGCATCTCGAGGAATTCTAGCGGCCGCATCCGCGGAGAG-3') oligonucleotides (complementary sequences greyed)(Supplemental Figure 4). *XbaI* and *NsiI* were used to remove the GAL80 coding region and the *mini-white* gene from the pDJ136 and insert the multiple restriction sites to create the 4485bp pDJ139 plasmid. The presence of the insert and the structure of the plasmid were determined by *XhoI* digestion. The functionality of each site introduced with the linker was confirmed by restriction digest.

#### *pDJ140 subcloning*

The *tubulin 1a* promoter from the pTub-GAL80 (Lee and Luo 1999) was subcloned into the pDJ139 with *EcoRI* and *NotI* to obtain the 7104bp pDJ140 plasmid (Supplemental Figure 5). The presence of the insert and the structure of the plasmid were confirmed by *SacII* and *EcoRI/NotI* digestions. pDJ140 increases the diversity of restriction sites available for cloning between the *tubulin 1a* promoter and the SV40 poly A region.

#### *pDJ143 subcloning*

The BamHI fragment from the pMS12 (Stebbins and Yin 2001) containing the tetracycline-responsive transactivator (tTA) was ligated to the *BglII* site of the pDJ140 to generate the 8384bp pDJ143 plasmid (Supplemental Figure 6). The orientation of the insert and the structure of the plasmid were determined by *XbaI* digestion.

#### *pDJ146 subcloning*

The *tubulin 1a* promoter–tTA–SV40 section of the pDJ143 was inserted between the *TetO* promoter and the scs' insulator element of the pDJ138 using *XhoI* (Supplemental Figure 7). The orientation of the insert and the structure of the resulting 17506bp pDJ146 plasmid were confirmed by *XhoI* and *XbaI* digestions.

## **pDJ147 construction**

### *pDJ141 subcloning*

The *actin5C* promoter from the pMS12 (Stebbins and Yin 2001) was subcloned into the pDJ139 with *SacI* and *NotI* to obtain the 7000bp pDJ141 plasmid (Supplemental Figure 8). The presence of the insert and the structure of the plasmid were confirmed by *AatII* and *NotI/SacI* digestions. pDJ141 increases the diversity of restriction sites available for cloning between the *actin5C* promoter and the SV40 poly A region.

### *pDJ144 subcloning*

The BamHI fragment from the pMS12 (Stebbins and Yin 2001) containing the tetracycline-responsive transactivator (tTA) was ligated to the *BglII* site of the pDJ141 to generate the 8280bp pDJ144 plasmid (Supplemental Figure 9). The orientation of the insert and the structure of the plasmid were determined by *XbaI* digestion.

### *pDJ159 subcloning*

Despite many attempts, we could not get the *actin5C* promoter-tTA-SV40 *XhoI* fragment from the pDJ144 inserted in the pDJ138. We therefore relocated the *XhoI* in pDJ138 between the  $\beta$ -globin poly A signals and the scs insulator element. The *XhoI* site was removed from the pDJ138 by digestion with *XhoI*, filling with T4 polymerase and circularization with DNA ligase to obtain the 12857bp pDJ158. An adapter generated by the annealing of the DJ188 (5'-GGCCTCGAGTGCAGC-3') and DJ189 (5'-GGCCGCTGCACTCGA-3') oligonucleotides (complementary sequences greyed) was ligated to the *NotI* site of the pDJ158 to create the 12872bp pDJ159 plasmid (Supplemental Figure 10).

### *pDJ160 subcloning*

We still could not get the *actin5C* promoter-tTA-SV40 *XhoI* fragment from the pDJ144 inserted in the pDJ159. We therefore modified the pDJ144 to allow the excision of the *actin5C* promoter-tTA-SV40 cassette with *NotI* (Supplemental Figure 11). An adapter generated by the annealing of the DJ192 (5'-

GCGGCCGCATGCA-3') and DJ193 (5'-TGCGGCCGCTGCA-3') oligonucleotides (complementary sequences greyed) was ligated to the *Pst*I site of the pDJ144 to create the 8293bp pDJ160 plasmid.

#### *pDJ147 subcloning*

The *actin5C 1a* promoter-tTA-SV40 section of the pDJ160 was inserted between the  $\beta$ -globin poly A signals and the scs insulator element of the pDJ159 using *Not*I (Supplemental Figure 12). The orientation of the insert and the structure of the resulting 17425bp pDJ147 plasmid were confirmed by *Xho*I and *Spe*I digestions.

### **Quantification of tTA pre-adult expression**

#### *Methods*

Experimental animals were obtained by crossing tetO-lacZ females by UAS-grim, UAS-grim; DJ1077, UAS-grim; 2.1, and UAS-grim; 2.1, DJ1077 males. Wandering L3 progeny were identified and selected for L3 samples. Early pupae were identified (white) and the following day selected (yellow). Late pupae were identified and selected when the wings and eyes were fully developed. All samples were processed with the CPRG assay as described in the Materials and Methods.

#### *Results*

To investigate why an additional copy of DJ147 rather than another copy of DJ146 leads to better repression, males carrying 1 copy of DJ146, 1 copy of DJ147 or 1 copy of both DJ146 and DJ147 were crossed to females carrying a tetO-lacZ reporter gene (Supplemental Figure 32). The level of *lacZ* activity was measured at the L3 larval, early pupal and late pupal stages using the CPRG assay. The DJ146 transgene displayed higher *lacZ* activity than the DJ147 transgene at all stages tested. The combination of 1 copy of DJ146 with 1 copy of DJ147 did not result in a significant increase of *lacZ* activity except in late pupae.

## Midlife Induction

### *Methods*

DJ694 and  $w^{1118}$  males were crossed with UAS-lacZ females while DJ694; 3.3 + DJ1077 males were crossed with UAS-lacZ; 3.3 + DJ1077 females. Age-synchronized cohorts of the resulting adult progeny were obtained by emptying cultures and collecting newly emerged flies within 48 h. Approximately 350 males and 350 females from each cross were collected under nitrogen anesthesia. Males and females were maintained separately at 25°C at a density of 25-30 flies per vial and raised on standard fly food until 20 days of age. At 20 days, each gender was randomly subdivided in 3 cohorts, each of which was provided food containing a different concentration of tetracycline (0, 1, or 100 $\mu$ g/ml). Fresh food was provided by transferring to new vials twice a week. Individuals were randomly removed from each cohort at 22, 25, 30 and 40 days of age and were processed for the CPRG assay. For the X-gal staining, flies were removed and processed at 30 days of age.

### *Results*

Individuals carrying the UAS-lacZ reporter alone or in combination with the DJ694 driver served as negative and positive controls, respectively. The level of *lacZ* expression was measured by CPRG assay at 2, 5, 10 and 20 days after induction (22, 25, 30, 40 days of age). At each age, all inducer concentrations (0, 1, and 100 $\mu$ g/ml) for each experimental and control genotype were measured simultaneously (Supplemental Figure 33). Comparisons between experimental and control animals were performed to determine the repressive ability of GAL80 (Supplemental Table 11). In both sexes the presence of the GAL80 transgenes significantly reduced *lacZ* expression but never dropped it to the level of the negative control. The level of repression in males started to decrease at the same age and comparable magnitude as observed in the throughout-life induction experiments. Similarly, females displayed less repression than males.

Next the inducibility was examined. The different inducer concentrations were compared to determine the number of inducing concentrations and how many different levels of expression were achieved over the ages tested (Supplemental Table 12). As seen in the induction throughout life assay, two days of treatment with either inducer concentration was insufficient to induce *lacZ* expression in either sex. 5 days after induction both concentrations induced *lacZ* expression and resulted in a single level of expression in males. While in females there was no induction until 10 days of treatment and only with the highest concentration. After 10 days of treatment (30 days of age), flies were sectioned and stained with X-gal (Supplemental Figure 34). The staining reactions were shorter than in the throughout-life induction experiments because of the higher GAL4 expression at this age with the DJ694 driver. In the absence of GAL4, no expression is detected in any tissue of either sex. In animals carrying the GAL80 transgenes, *lacZ* expression is strongly reduced compared to the positive control animals (DJ694) but some expression remains in the thoracic flight muscles and the head, and it is higher in the females than the males. Animals fed tetracycline show induction of *lacZ* expression in the abdominal, labial and leg muscles. Induction is clearly visible in the thoracic muscles of the males but not in the females.

## **Kinetics of Reestablishment**

### *Methods*

DJ694 and w<sup>1118</sup> males were crossed with UAS-*lacZ* females while DJ694; 3.3 + DJ1077 males were crossed with UAS-*lacZ*; 3.3 + DJ1077 females. Age-synchronized cohorts of the resulting adult progeny were obtained by emptying cultures and collecting newly emerged flies within 48 h. Flies were treated with tetracycline (0, 1, or 100  $\mu$ g/ml) for the first five days of life. At five days of age the flies on the tetracycline food were either maintained on the treated food (positive controls) or placed on food containing no tetracycline (experimental genotypes).

Flies raised on food containing no tetracycline since adult emergence served as negative controls. The lacZ activity was quantified in all flies after 5 days (10 days of age), 9 days (14 days old), and 20 days (25 days old) with the CPRG assay as described in the Materials and Methods. The activities of the animals carrying GAL80 transgenes were normalized to the level of age matched animals carrying the driver and UAS-lacZ transgenes (no GAL80) with the same tetracycline treatment (Supplemental Figure 35). Statistical t-test analysis was performed to compare the experimental genotypes to the positive and negative controls.

### *Results*

In males, 5 days placement of the 1 $\mu$ g/ml flies onto food with no tetracycline resulted in a significant decrease in lacZ activity compared to the positive control (1 $\mu$ g/ml 10 day old flies), but was not sufficient to reduce the level of lacZ activity to the levels seen in the negative control (0 $\mu$ g/ml 10 day old flies). No difference in lacZ activity was detected between flies maintained on the 100 $\mu$ g/ml tetracycline treatment for the full 10 days and those switched to food containing no tetracycline at day 5. After 9 days on food with no tetracycline in both the 1 $\mu$ g/ml and 100 $\mu$ g/ml experimental males there was a significant decrease in the lacZ activity compared to the positive control, but was insufficient in reducing the level of lacZ activity to the levels seen in the negative control. However, after 20 days on food containing no tetracycline, the level of lacZ activity in male flies treated with 1 $\mu$ g/ml of tetracycline for the first five days of life was significantly lower than the positive control and indistinguishable from the negative control. In contrast the 100 $\mu$ g/ml males showed a significant decrease in lacZ activity compared to the positive control, but had not reduced the level of lacZ activity to the levels seen in the negative control. In females, at no age was the lacZ activity significantly reduced from the level of that of the positive control.

## References

- Lee, T., and L. Luo, 1999 Mosaic analysis with a repressible cell marker for studies of gene function in neuronal morphogenesis. *Neuron* 22: 451-461.
- Poirier, L., A. Shane, J. Zheng and L. Seroude, 2008 Characterization of the *Drosophila* gene-switch system in aging studies: a cautionary tale. *Aging Cell* 7: 758-770.
- Seroude, L., T. Brummel, P. Kapahi and S. Benzer, 2002 Spatio-temporal analysis of gene expression during aging in *Drosophila melanogaster*. *Aging Cell* 1: 47-56.
- Stebbins, M. J., and J. C. P. Yin, 2001 Adaptable doxycycline-regulated gene expression systems for *Drosophila*. *Gene* 270: 103-111.

## Supplemental figures



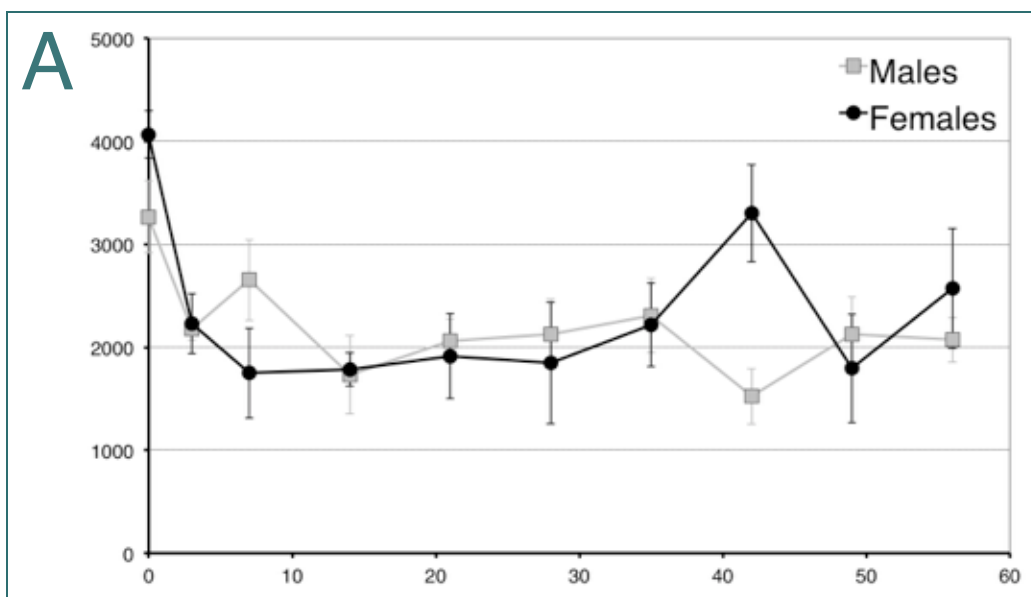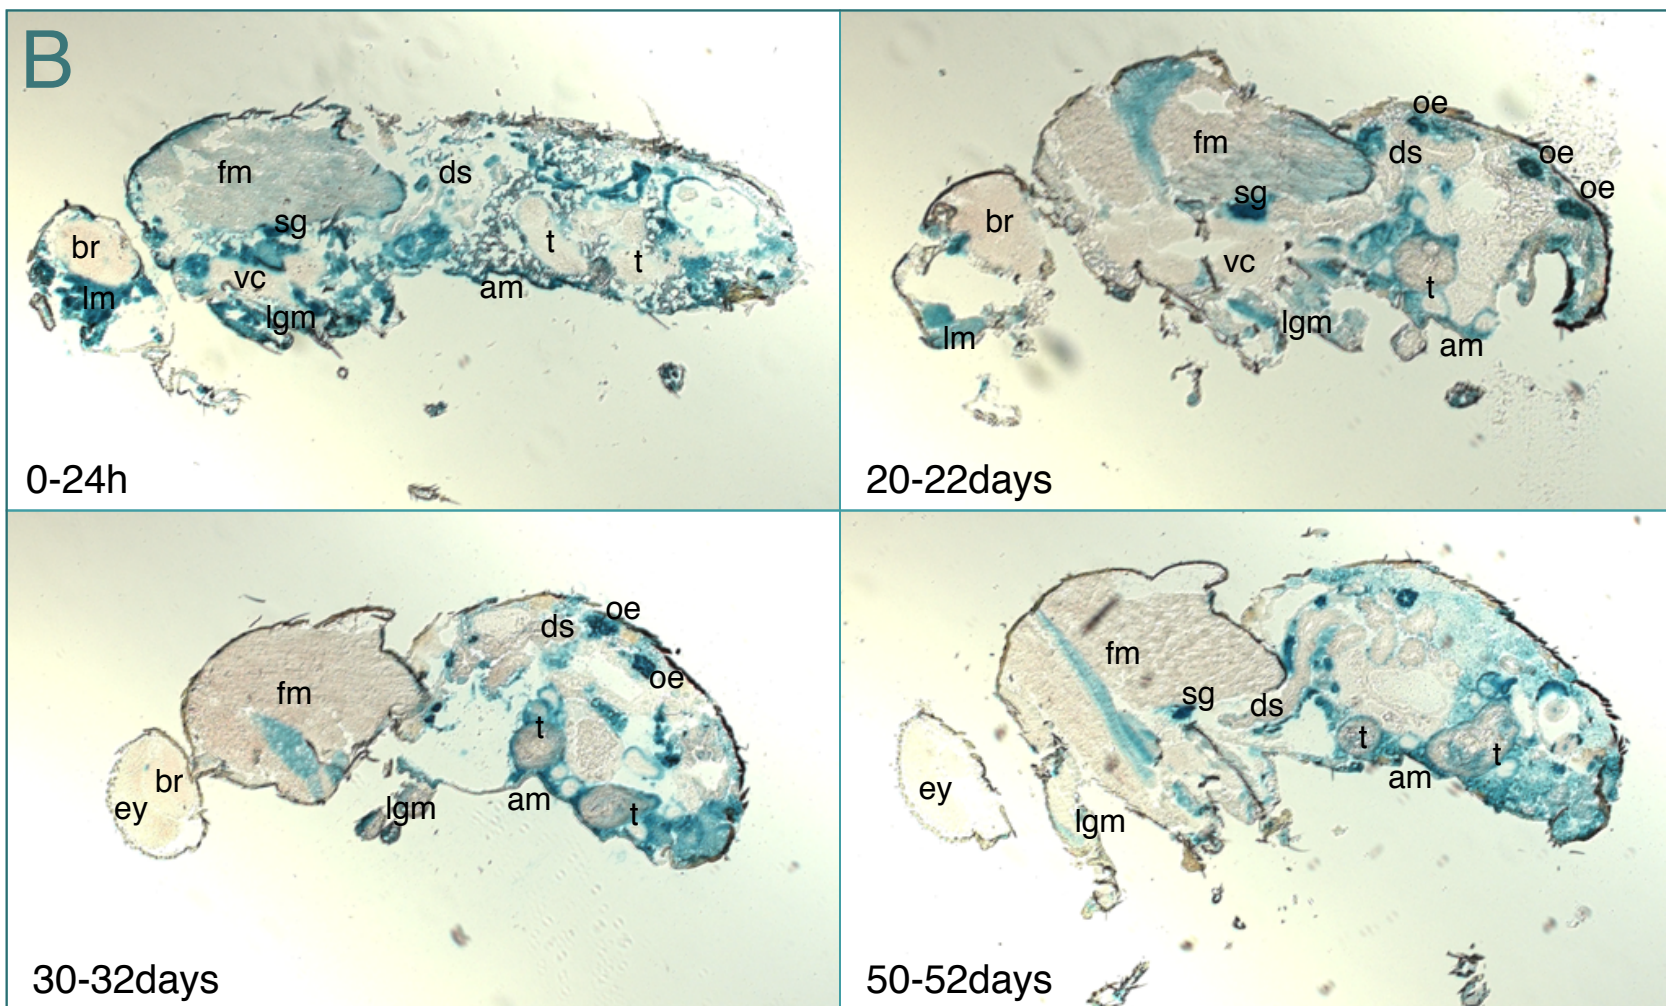

**Supplemental Figure 1** 24B GAL4-driven UAS-lacZ expression pattern during aging at 25°C. (A) Quantitative analysis across age with the CPRG assay. Each time point is the average of 5 single-fly extracts. X-axis: age in days from pupal emergence. Y-axis:  $\beta$ -galactosidase activity in  $\Delta mOD_{562}/\text{min}/\text{fly}$ . Error bars represent 2 standard deviations. (B) Qualitative analysis across age with the X-gal assay. am: abdominal muscles. br: brain. ds: digestive system. ey: eye. fm: flight muscles. lgm: leg muscles. lm: labium muscles. oe: oenocytes. sg: salivary glands. t: testis. vc: ventral chord.

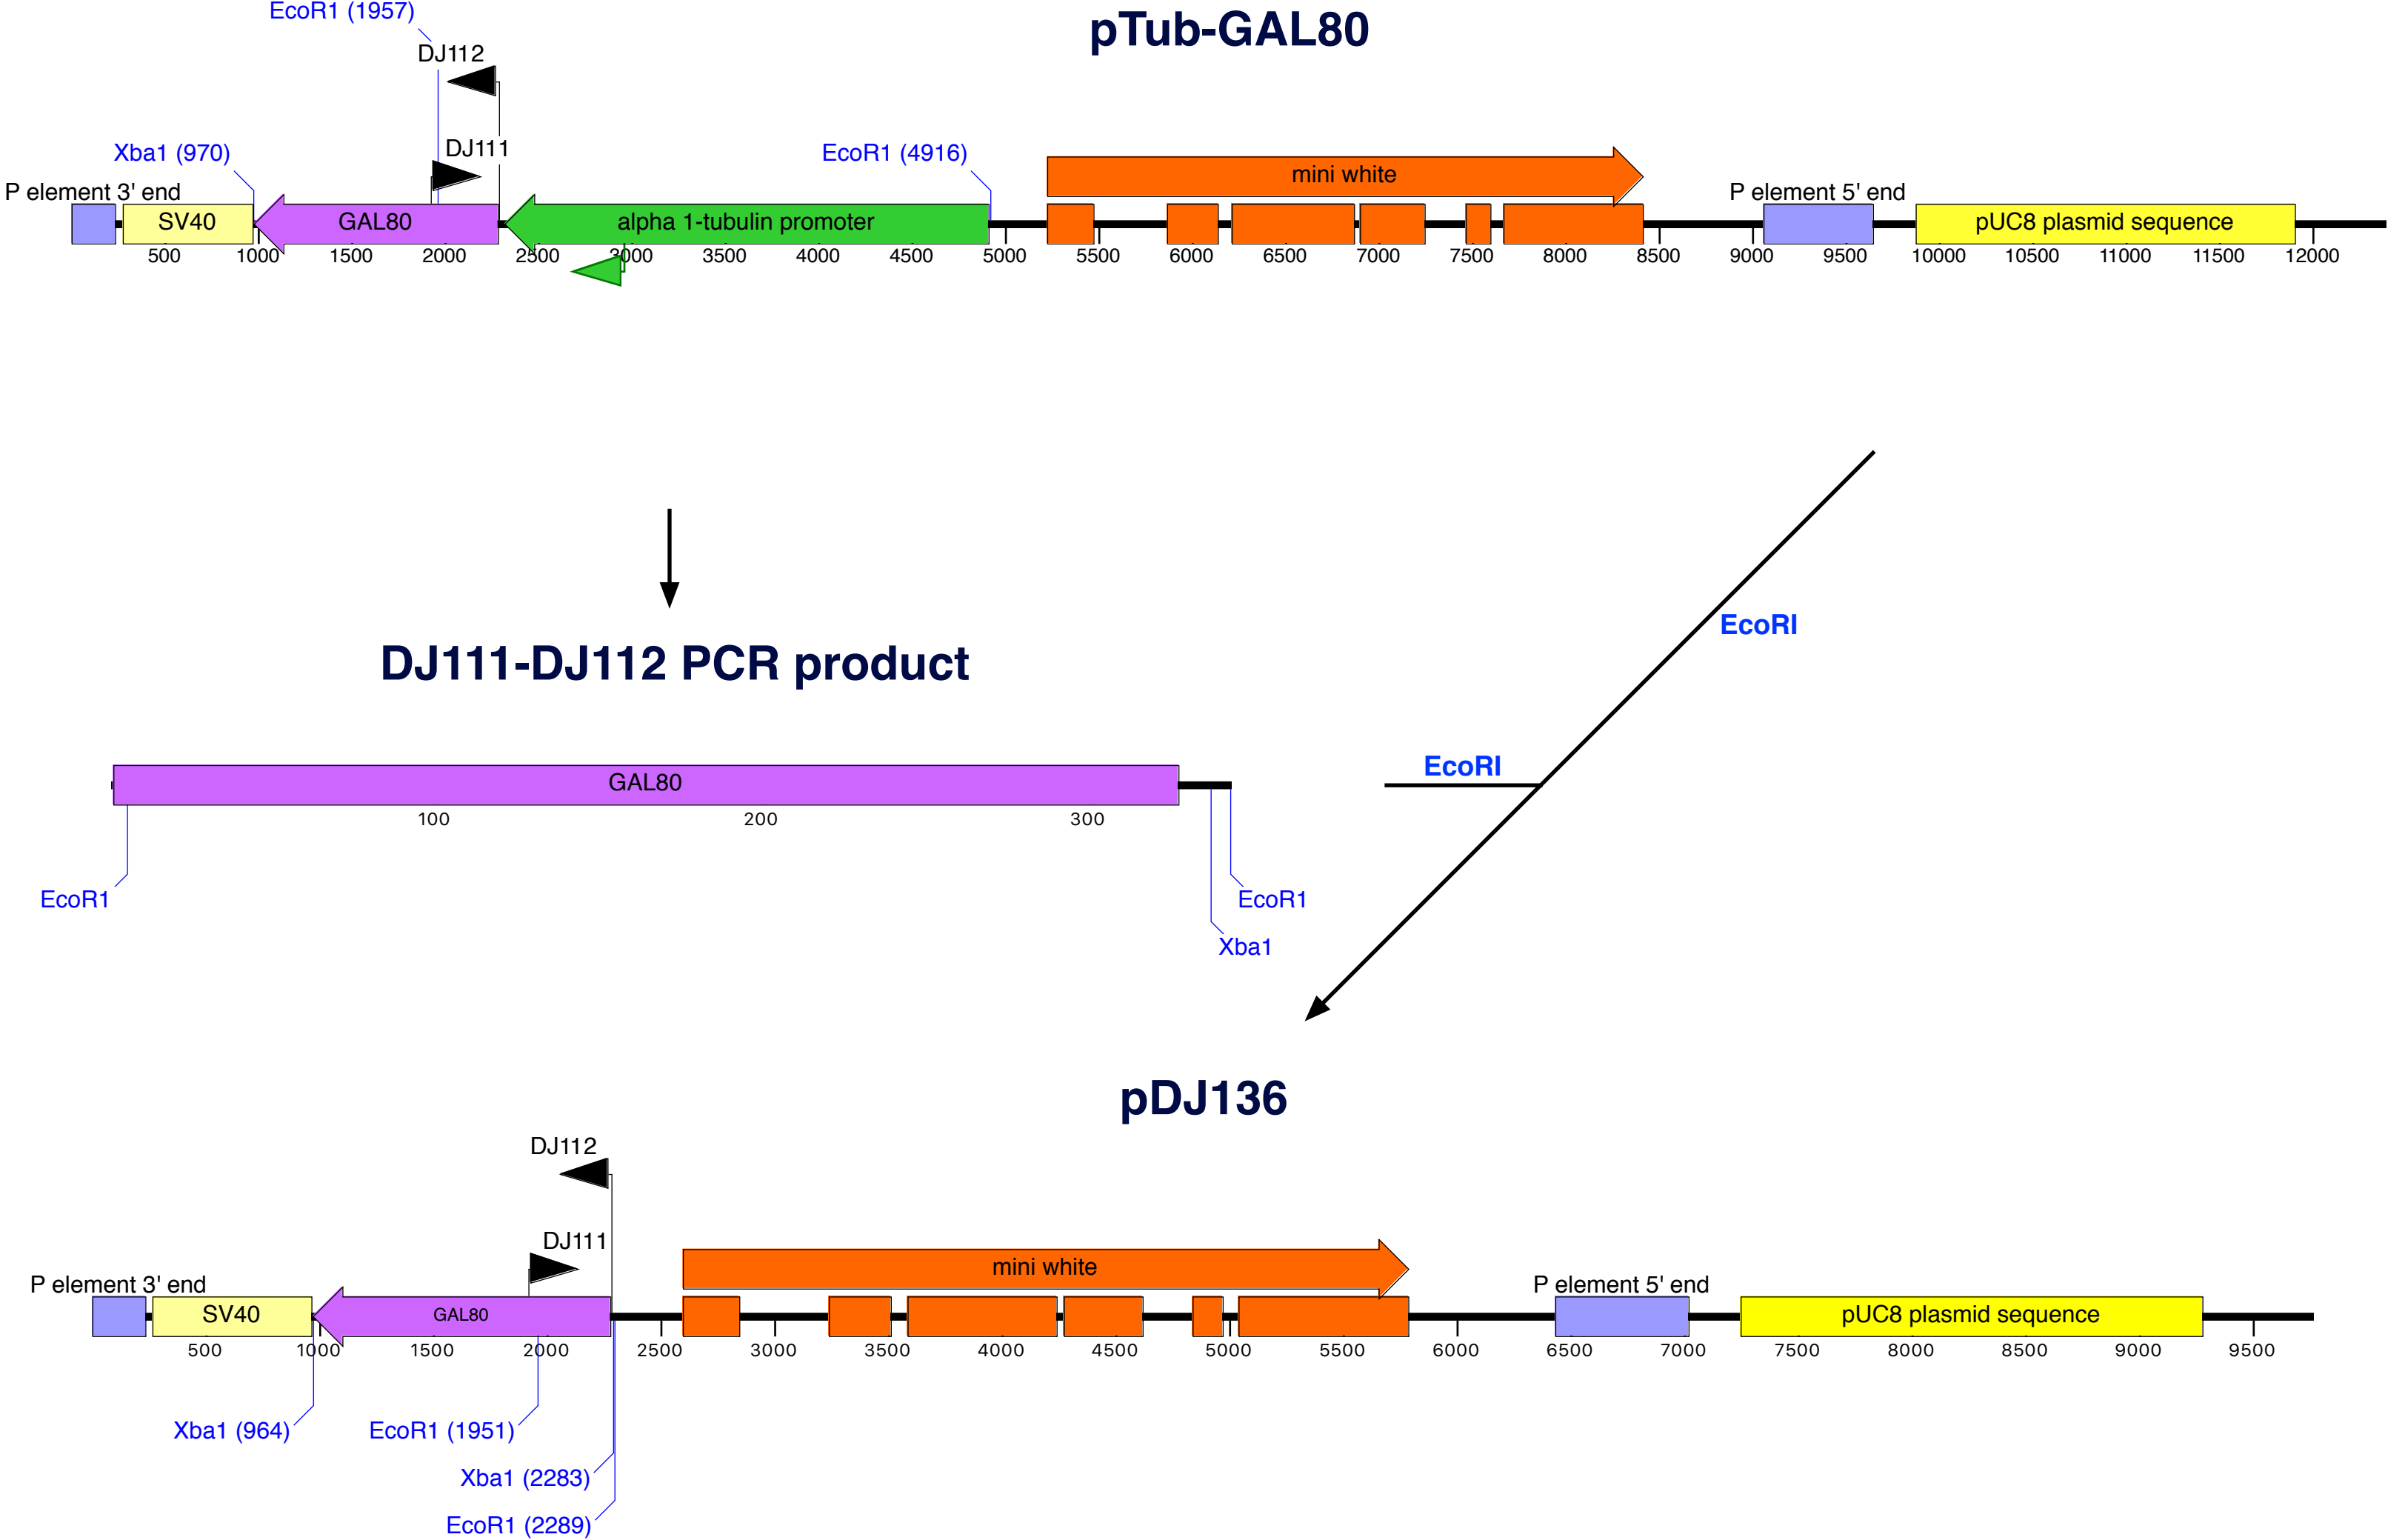

**Supplemental Figure 2** Construction of pDJ136. Arrows above sequence indicate the location of primers used for PCR or sequencing. Arrow below sequence indicates the start of transcription of a promoter.

## pDJ136

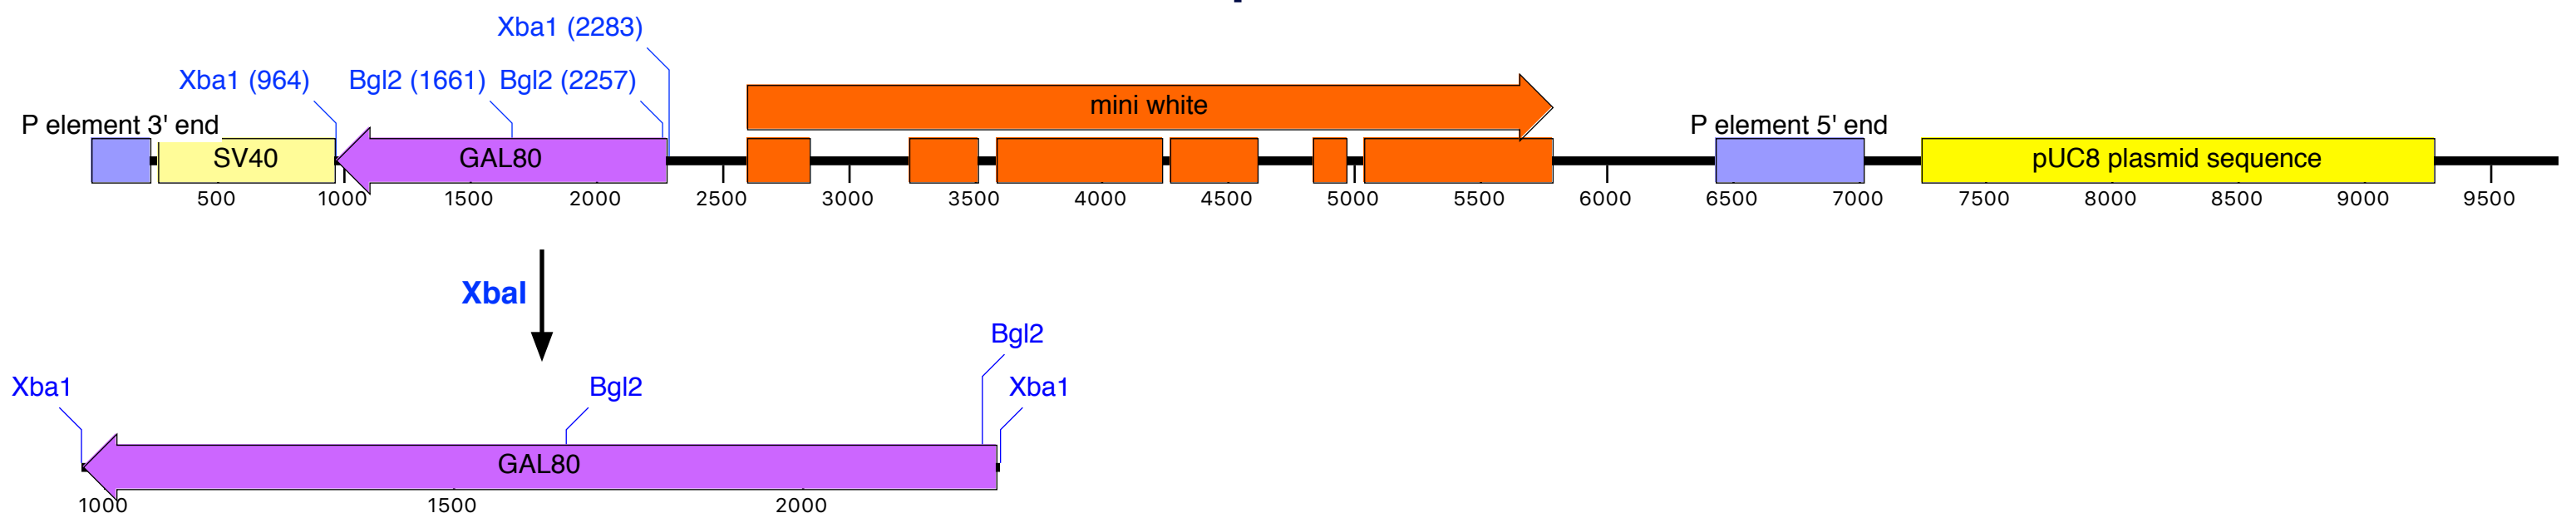

## pJY2000

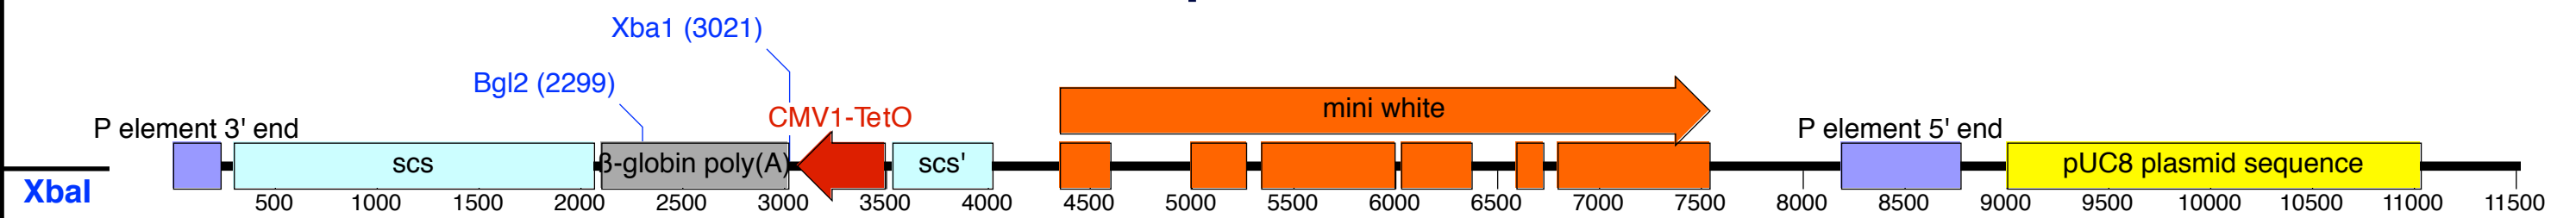

## pDJ138

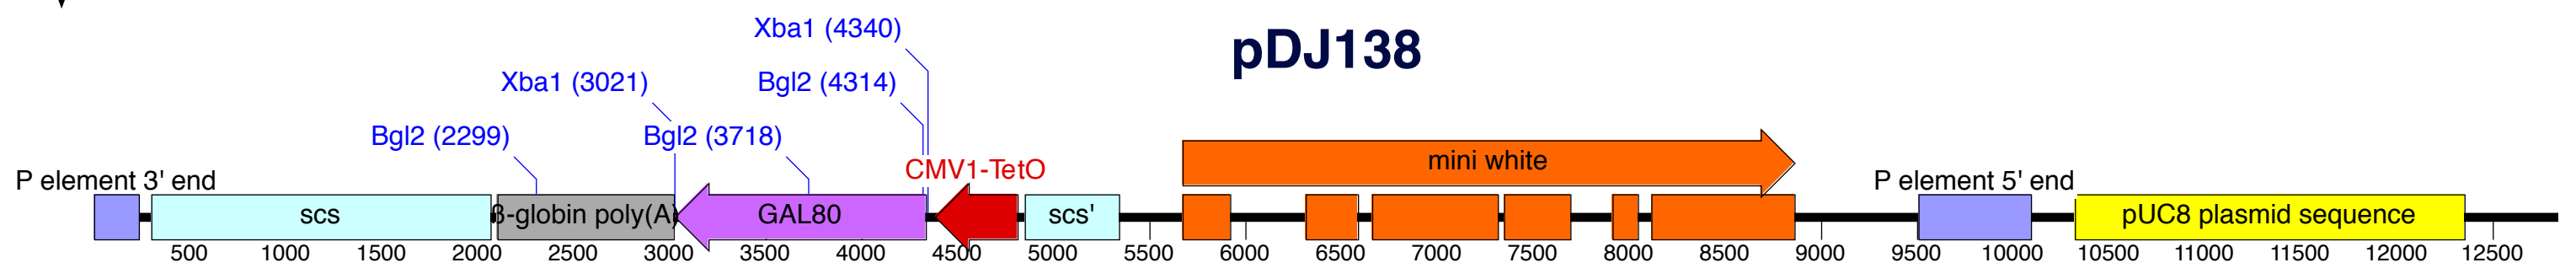

# pDJ136

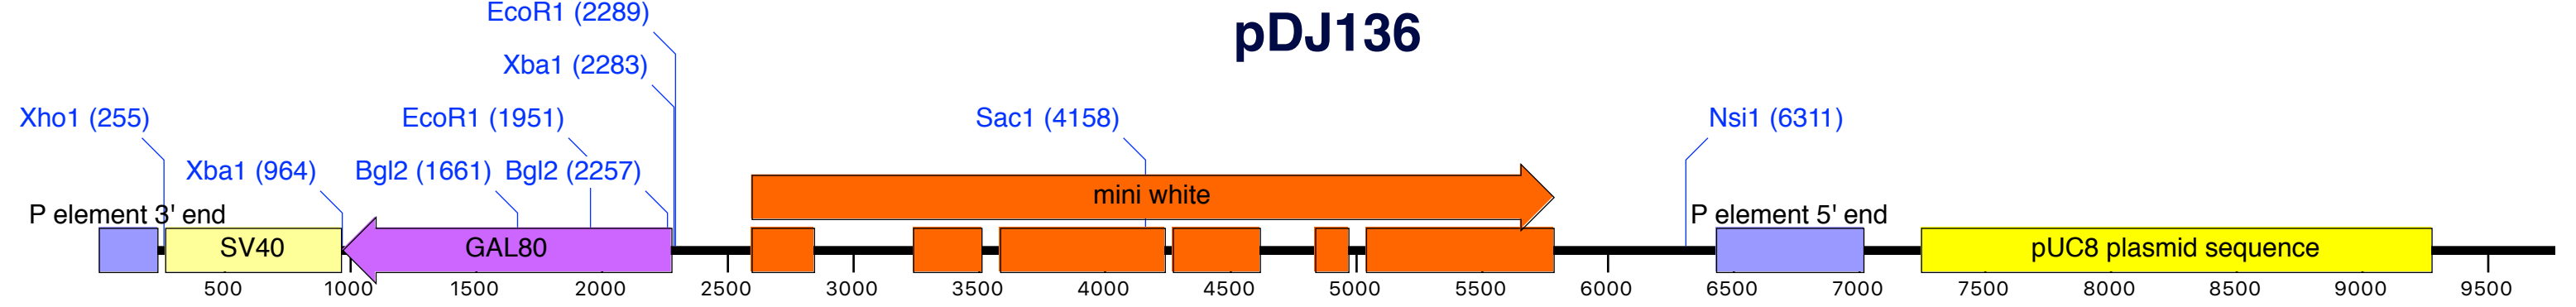

**XbaI-NsiI**

**DJ117 primer**

5'-AGTCTAGATAAGATCTGAGCTCTCCGCGGATGCGGCCGCTAGAA-3'

**DJ118 primer**

5'-ATATGCATCTCGAGGAATTCTAGCGGCCGCATCCGCGGAGAG-3'

**Hybridization**

**DJ117**

5'-AGTCTAGATAAGATCTGAGCTCTCCGCGGATGCGGCCGCTAGAA-3'

3'-GAGAGGCGCCTACGCCGGCGATCTTAAGGAGCTCTACGTATA-5'

**DJ118**

**T4 Polymerase  
S1 Nuclease**

**XbaI-NsiI**

5'-AGTCTAGATAAGATCTGAGCTCTCCGCGGATGCGGCCGCTAGAATTCCTCGAGATGCATAT-3'  
 3'-TCAGATCTATTCTAGACTCGAGAGGCGCCTACGCCGGCGATCTTAAGGAGCTCTACGTATA-5'

Restriction sites above sequence: XbaI, BglIII, SacI, SacII, NotI, EcoRI, XhoI, NsiI

# pDJ139

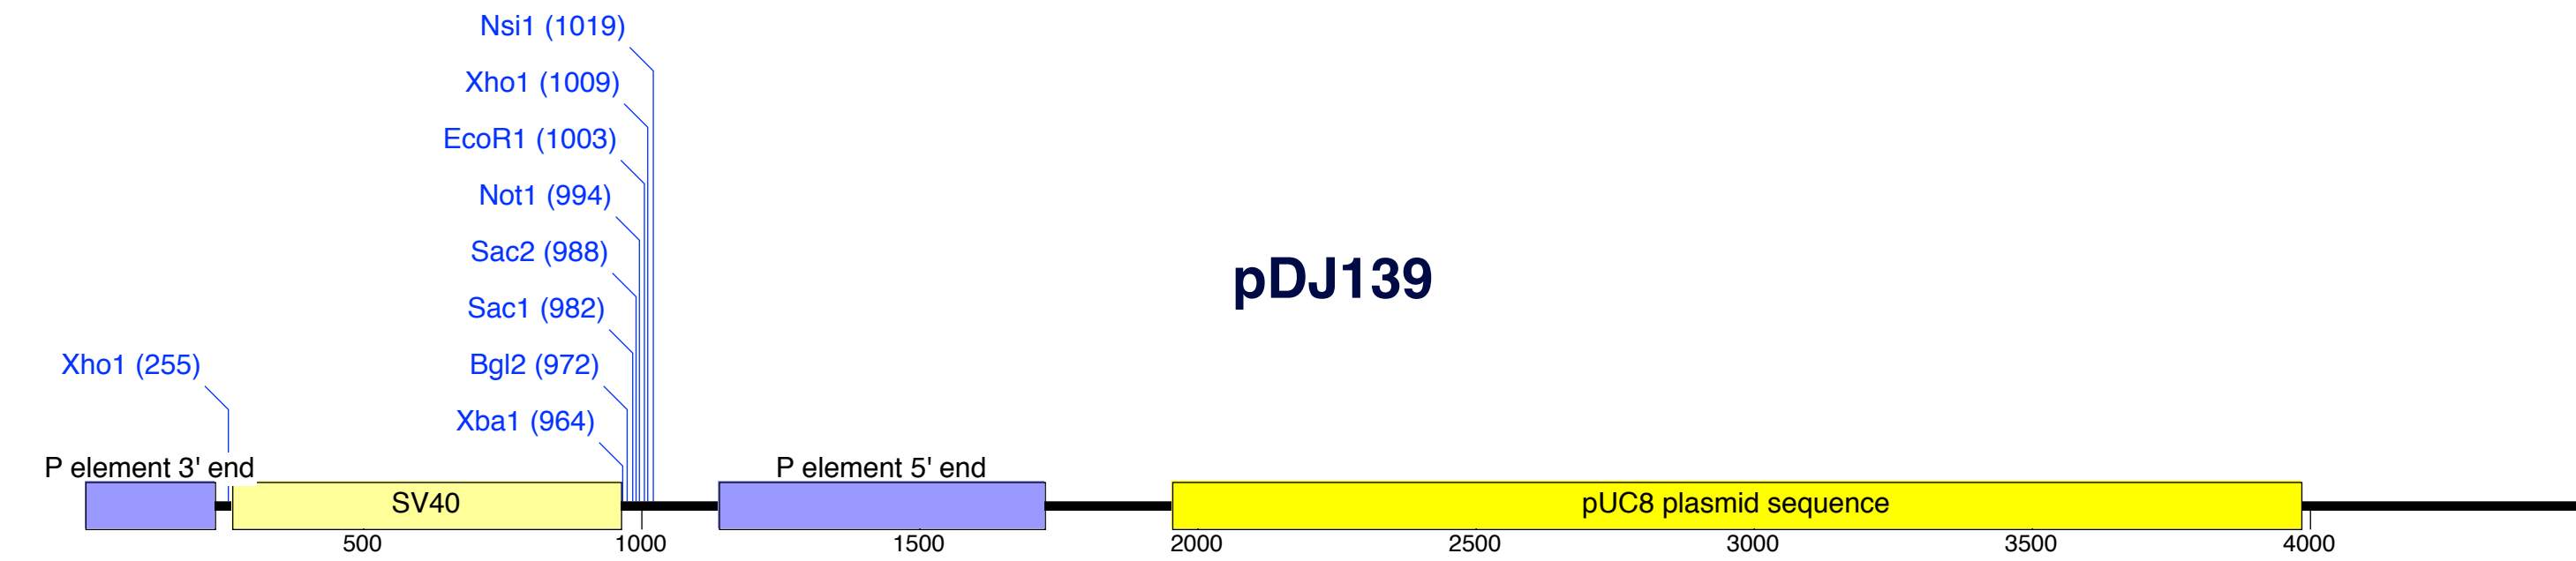

# pTub-GAL80

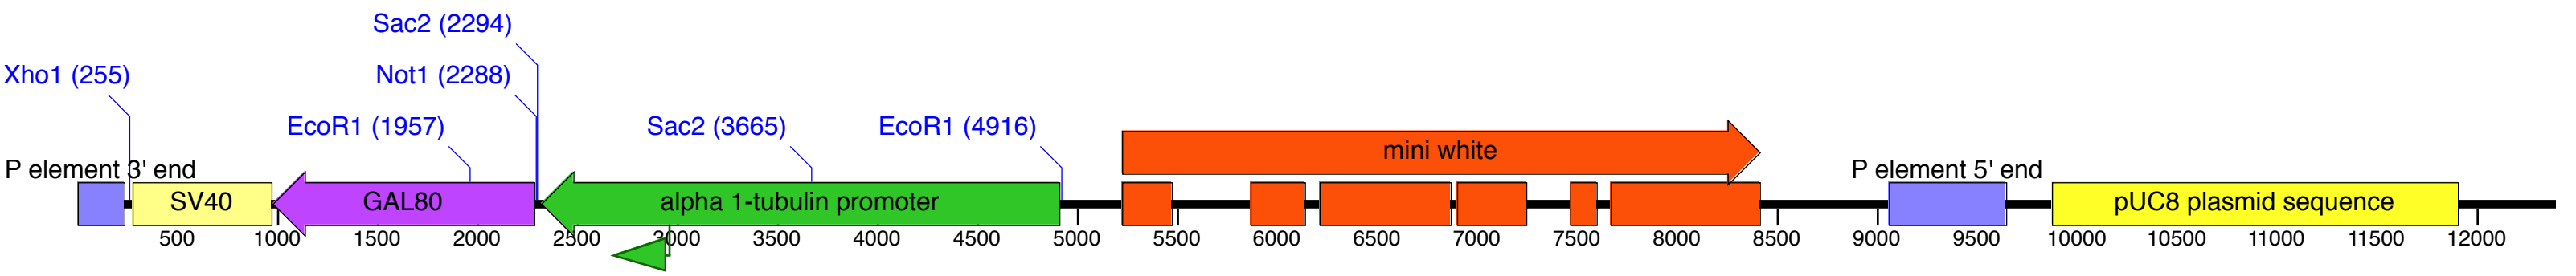

**EcoRI-NotI**

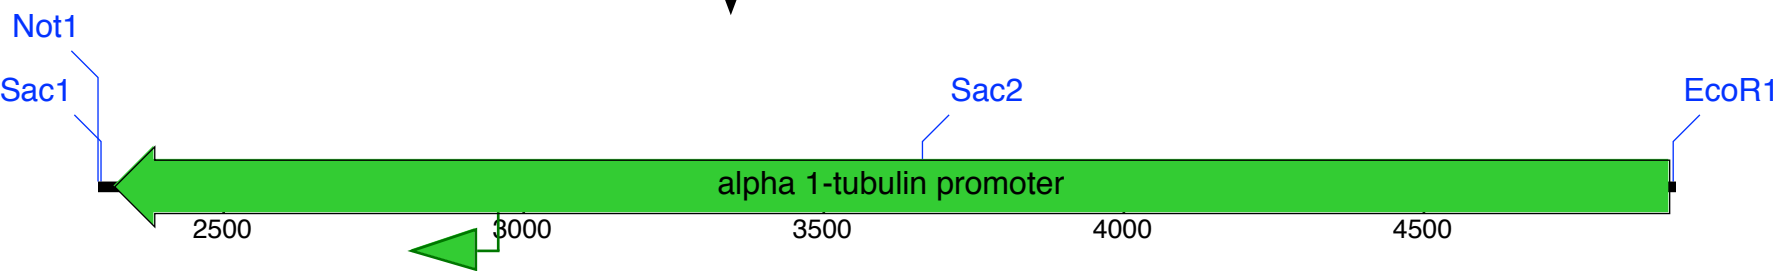

# pDJ139

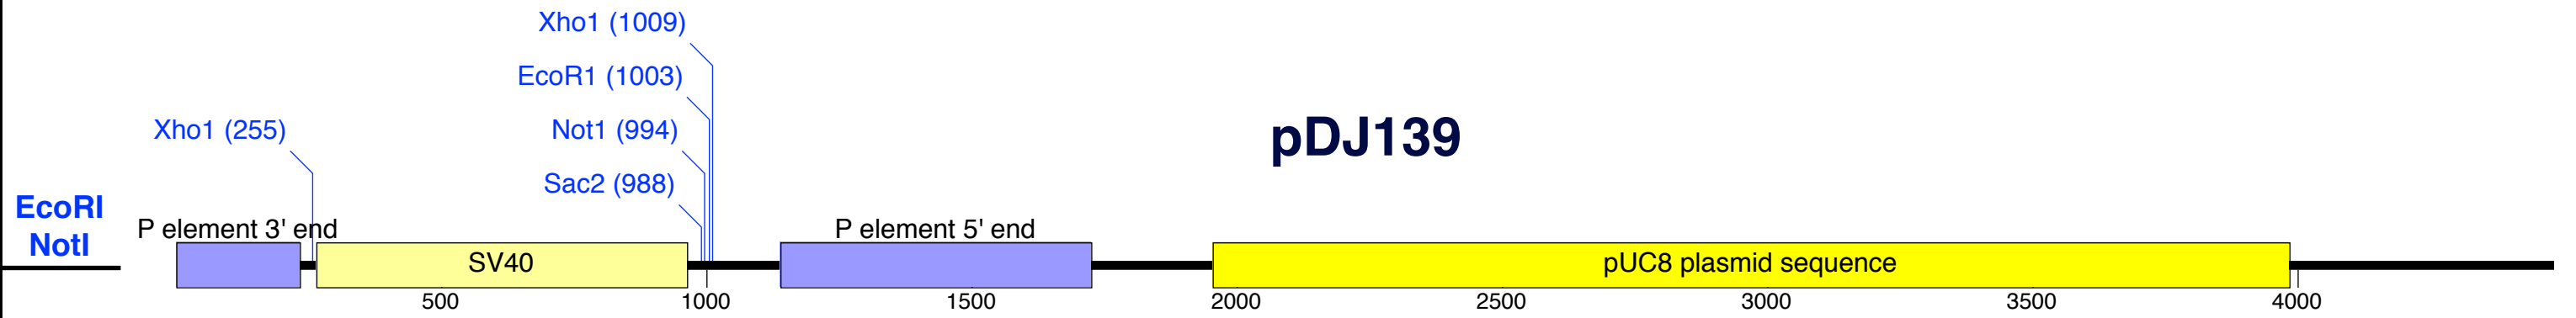

# pDJ140

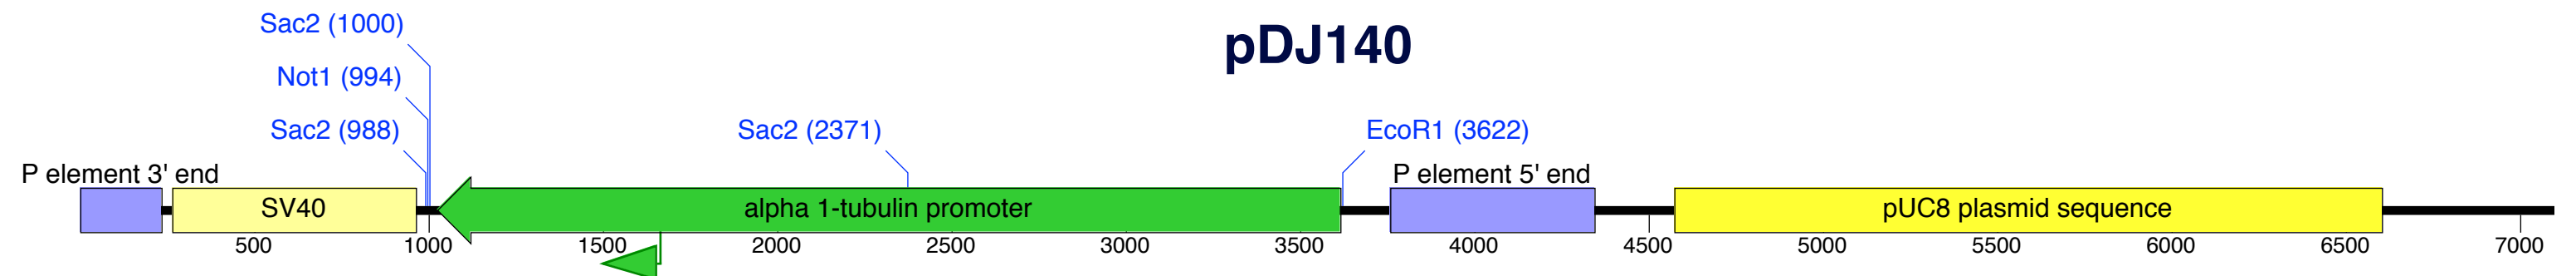

**Supplemental Figure 5** Construction of pDJ140. Green arrow indicates the start of transcription.

# pMS12 (tTA region)

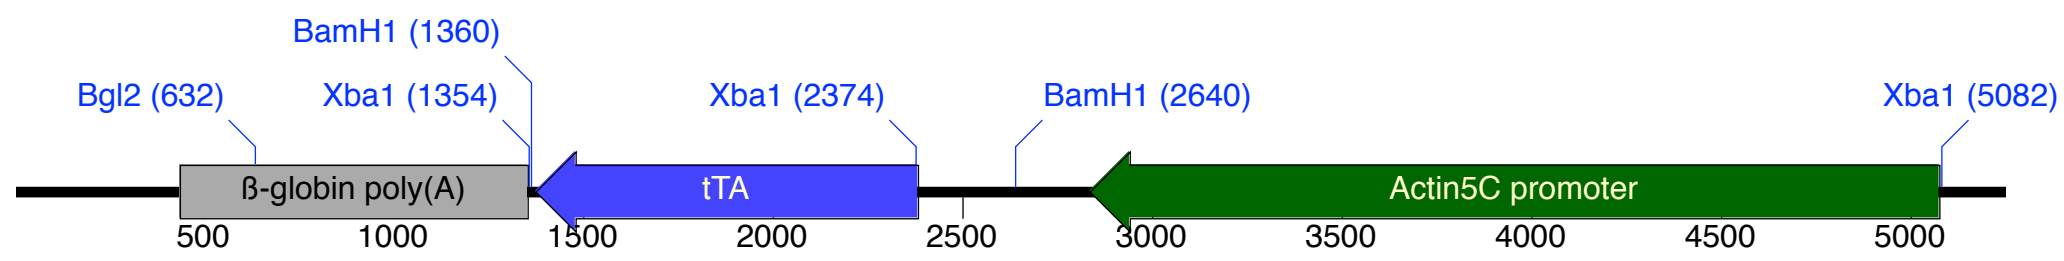

**BamHI**

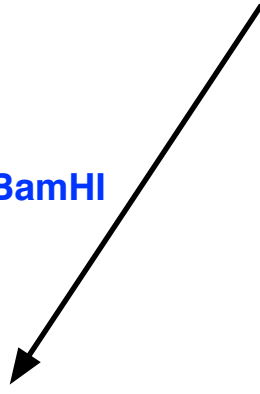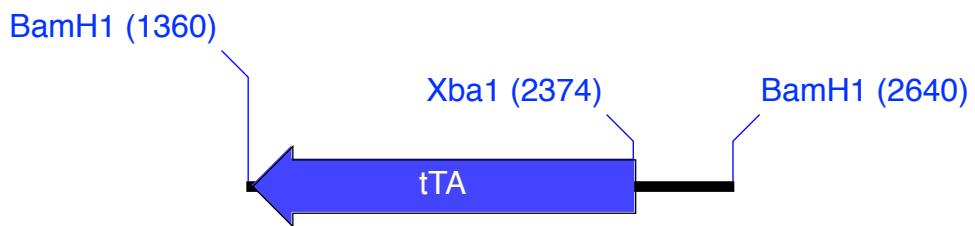

**BglIII**

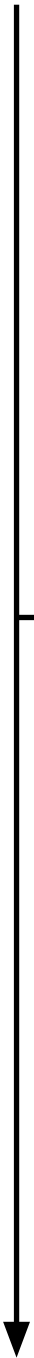

# pDJ140

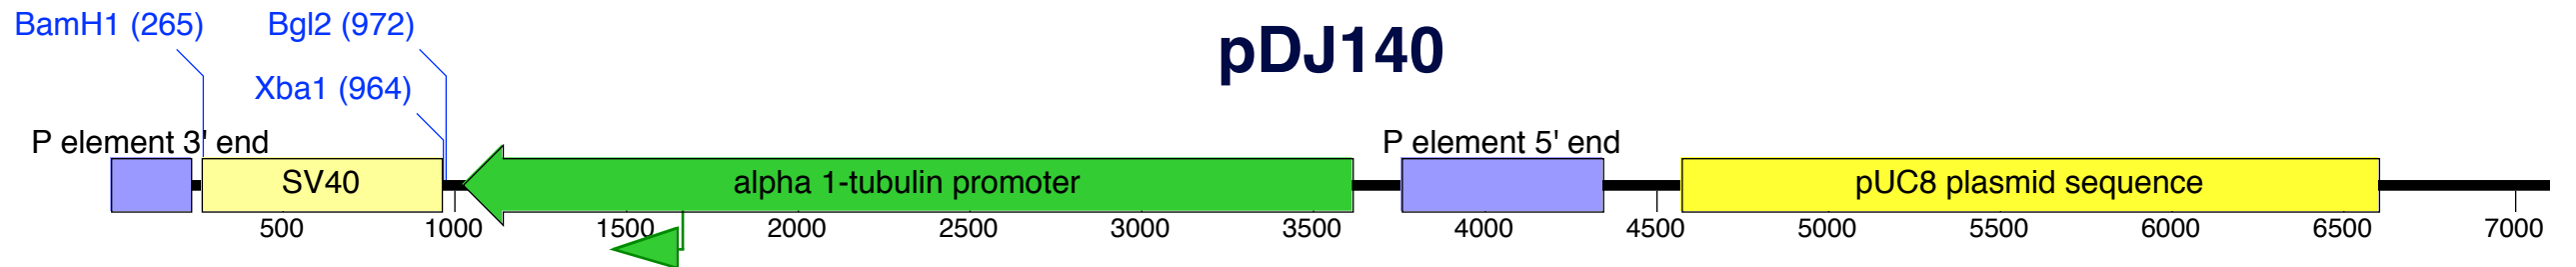

# pDJ143

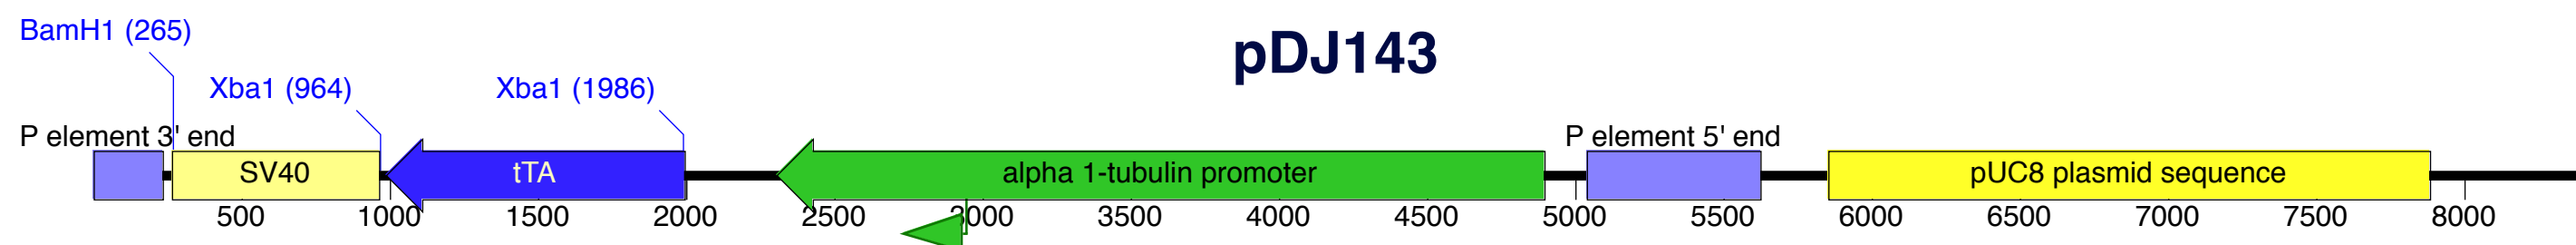

**Supplemental Figure 6** Construction of pDJ143. Green arrow indicates the start of transcription.

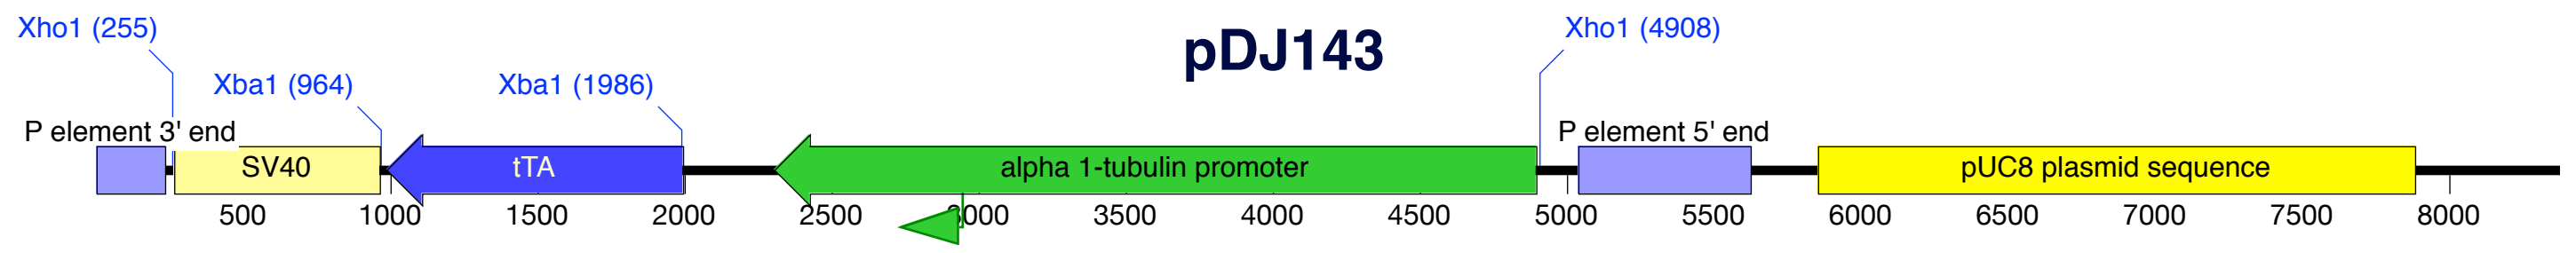

**pDJ143**

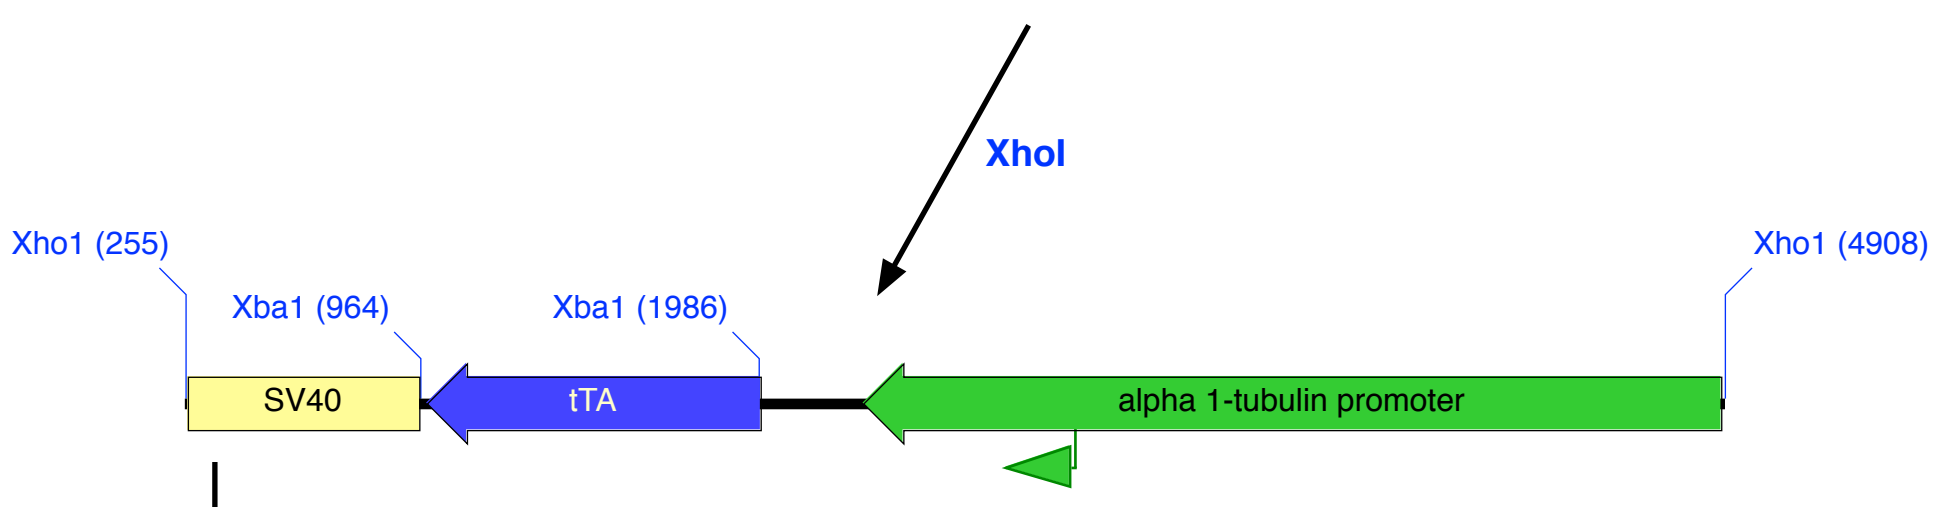

**pDJ138**

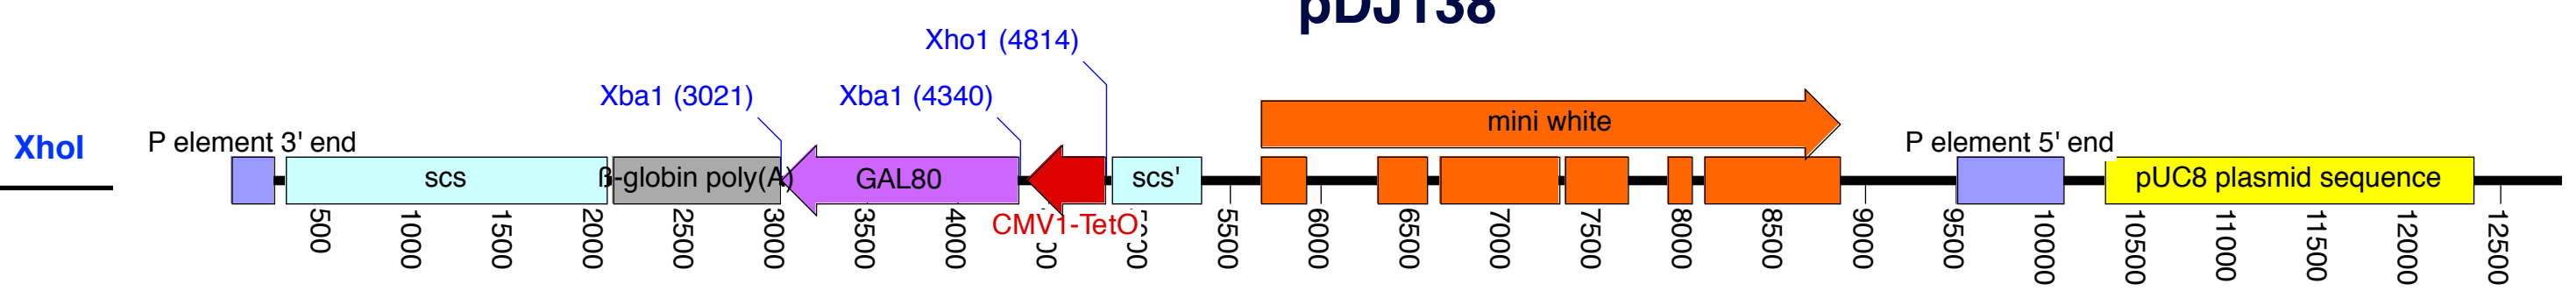

**pDJ146**

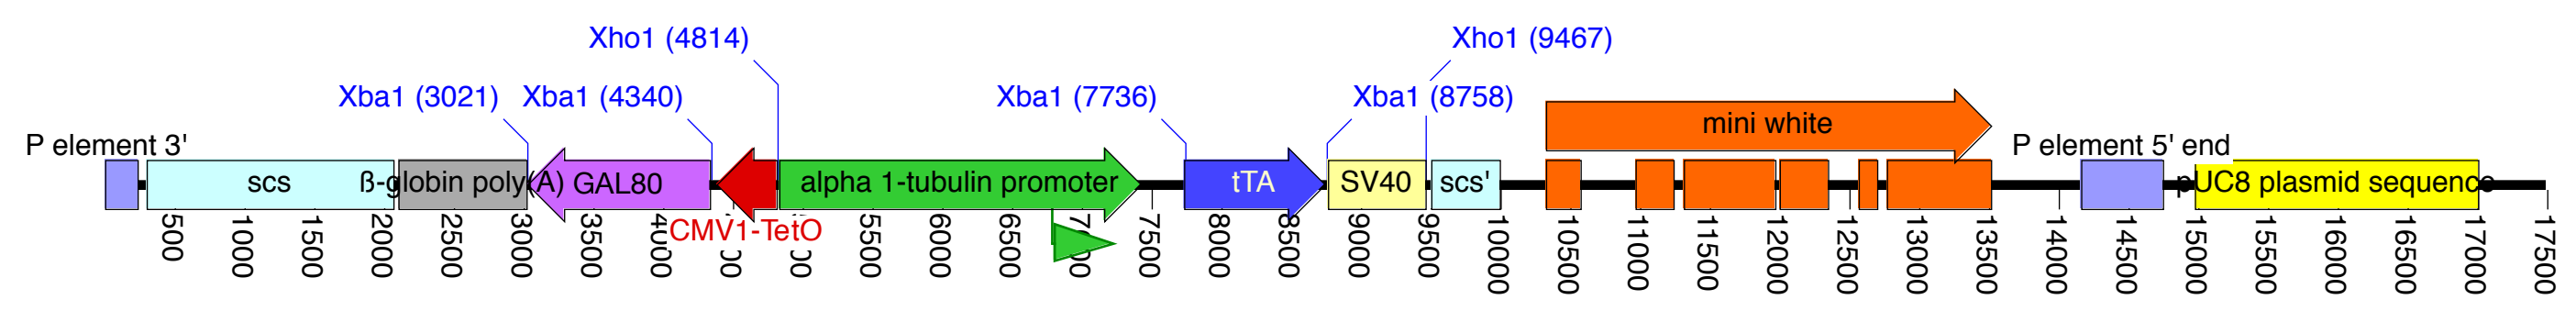

**Supplemental Figure 7** Construction of pDJ146. Green arrow indicates the start of transcription.



### pMS12 (tTA region)

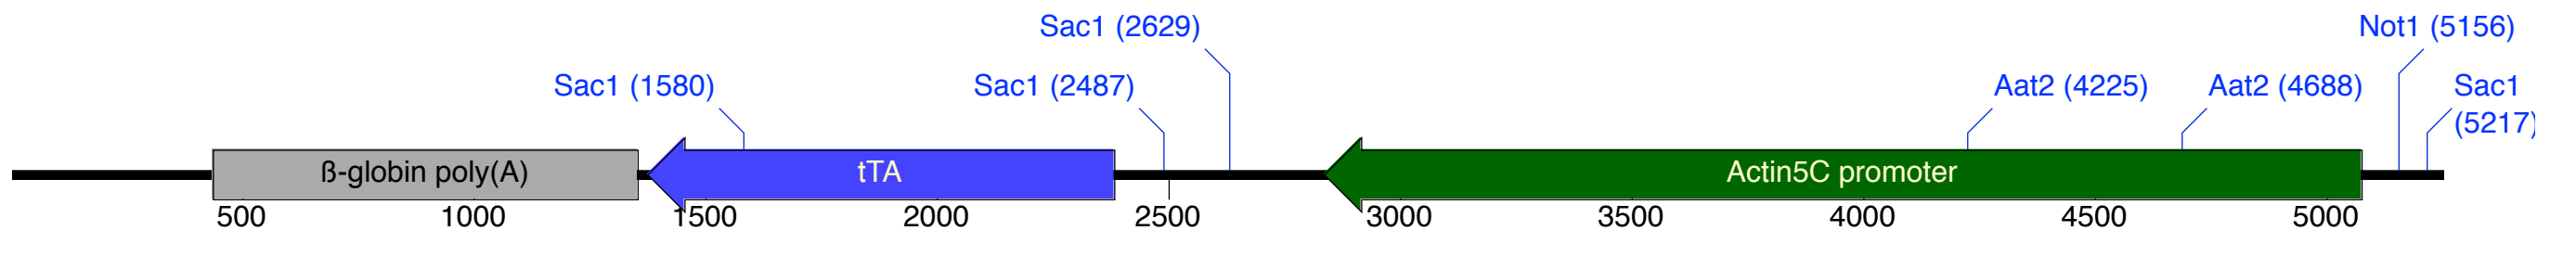

SacI-NotI

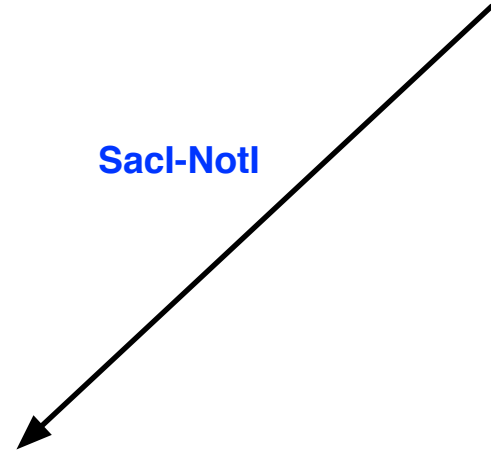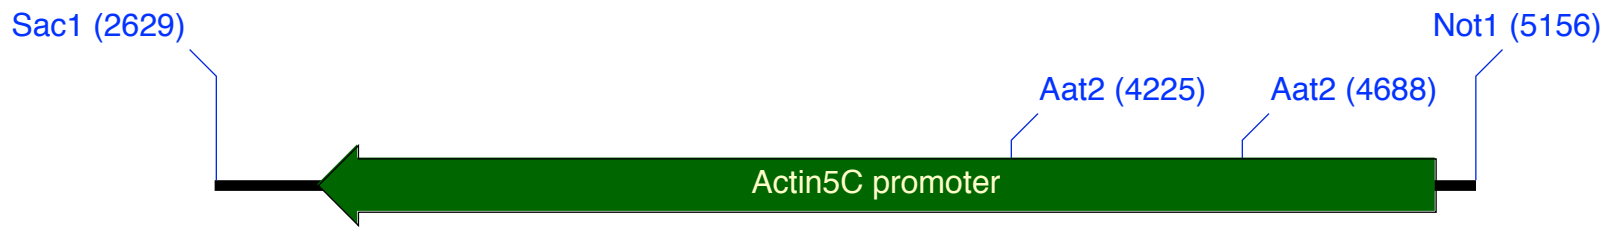

### pDJ139

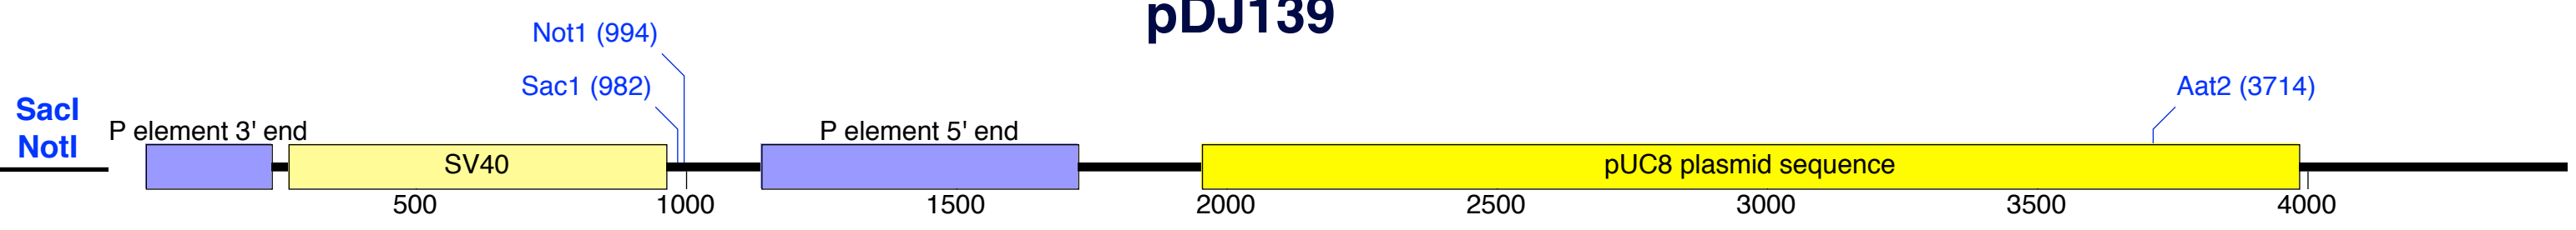

### pDJ141

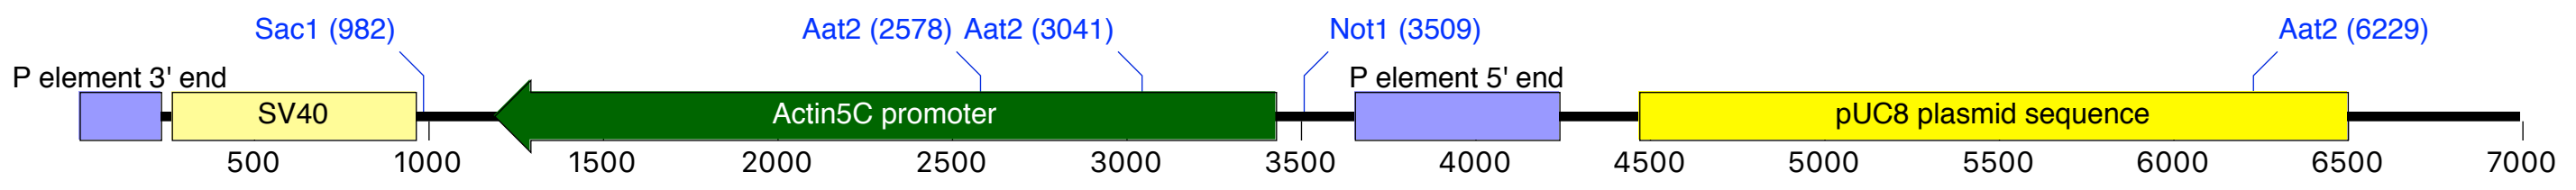

Supplemental Figure 8 Construction of pDJ141.



## pMS12 (tTA region)

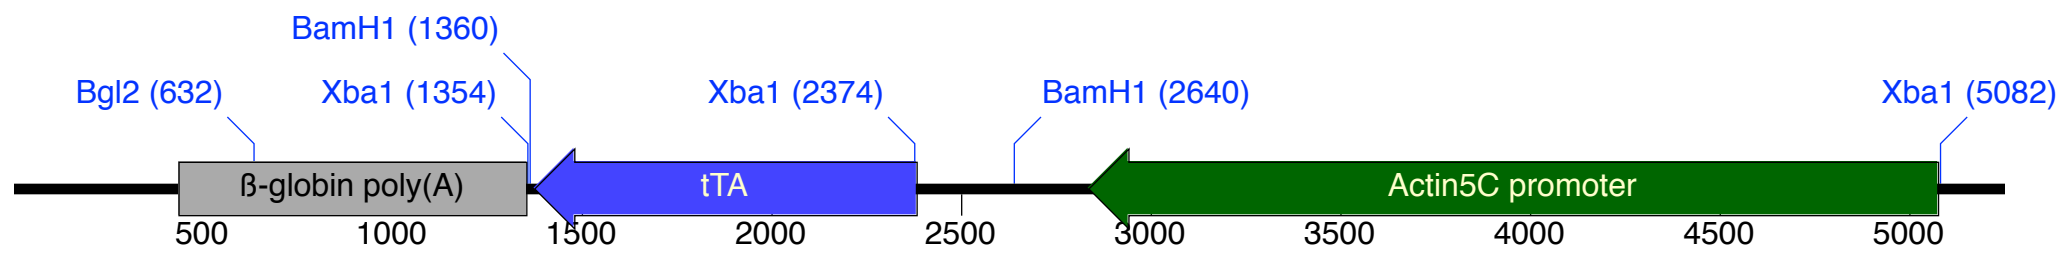

**BamHI**

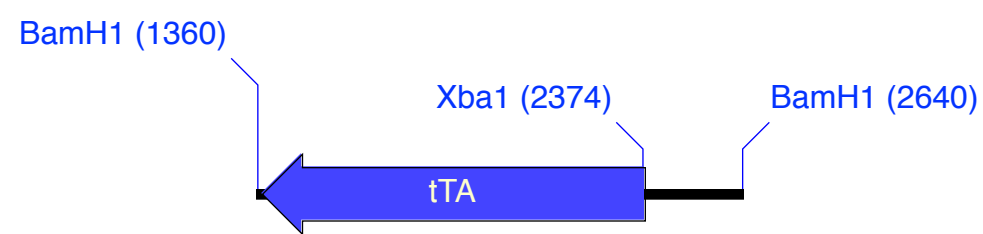

## pDJ141

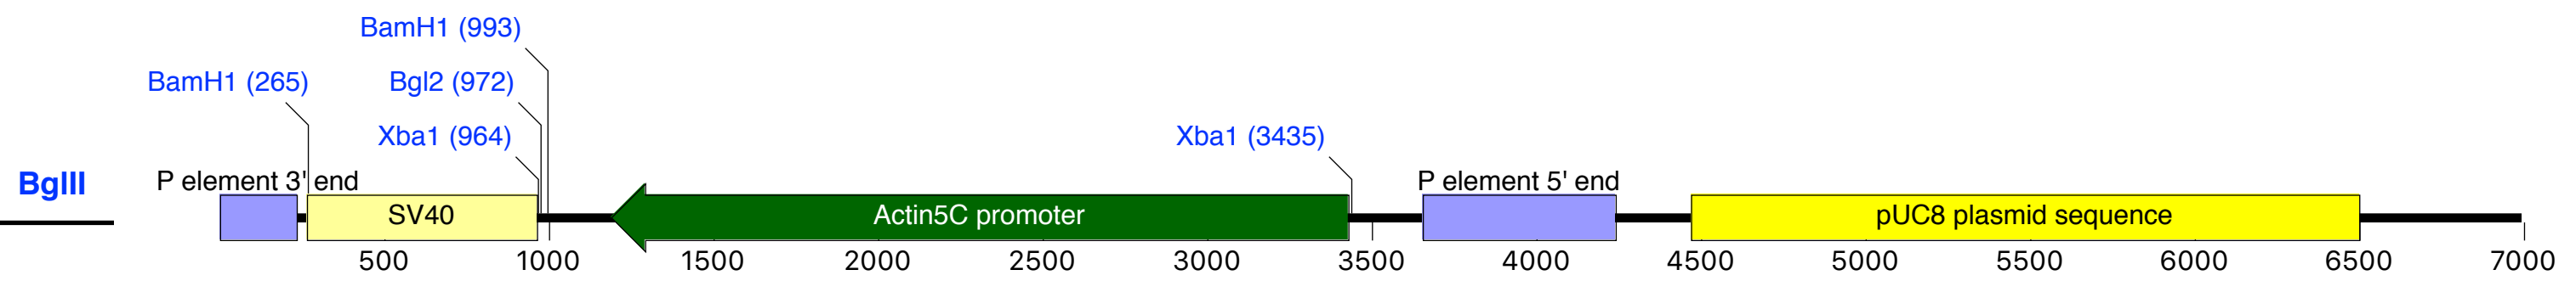

## pDJ144

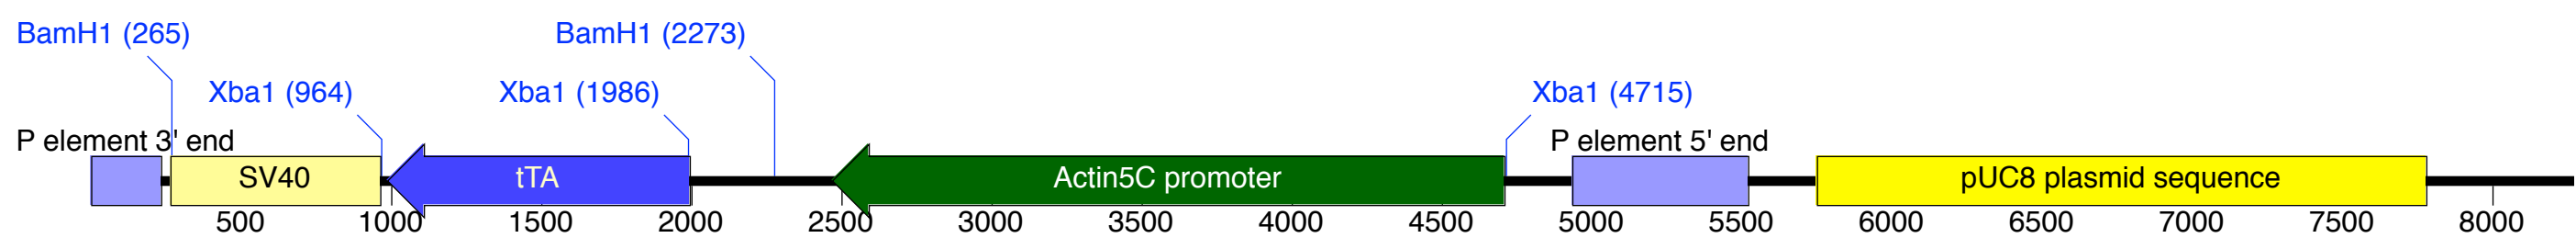

**Supplemental Figure 9** Construction of pDJ144.

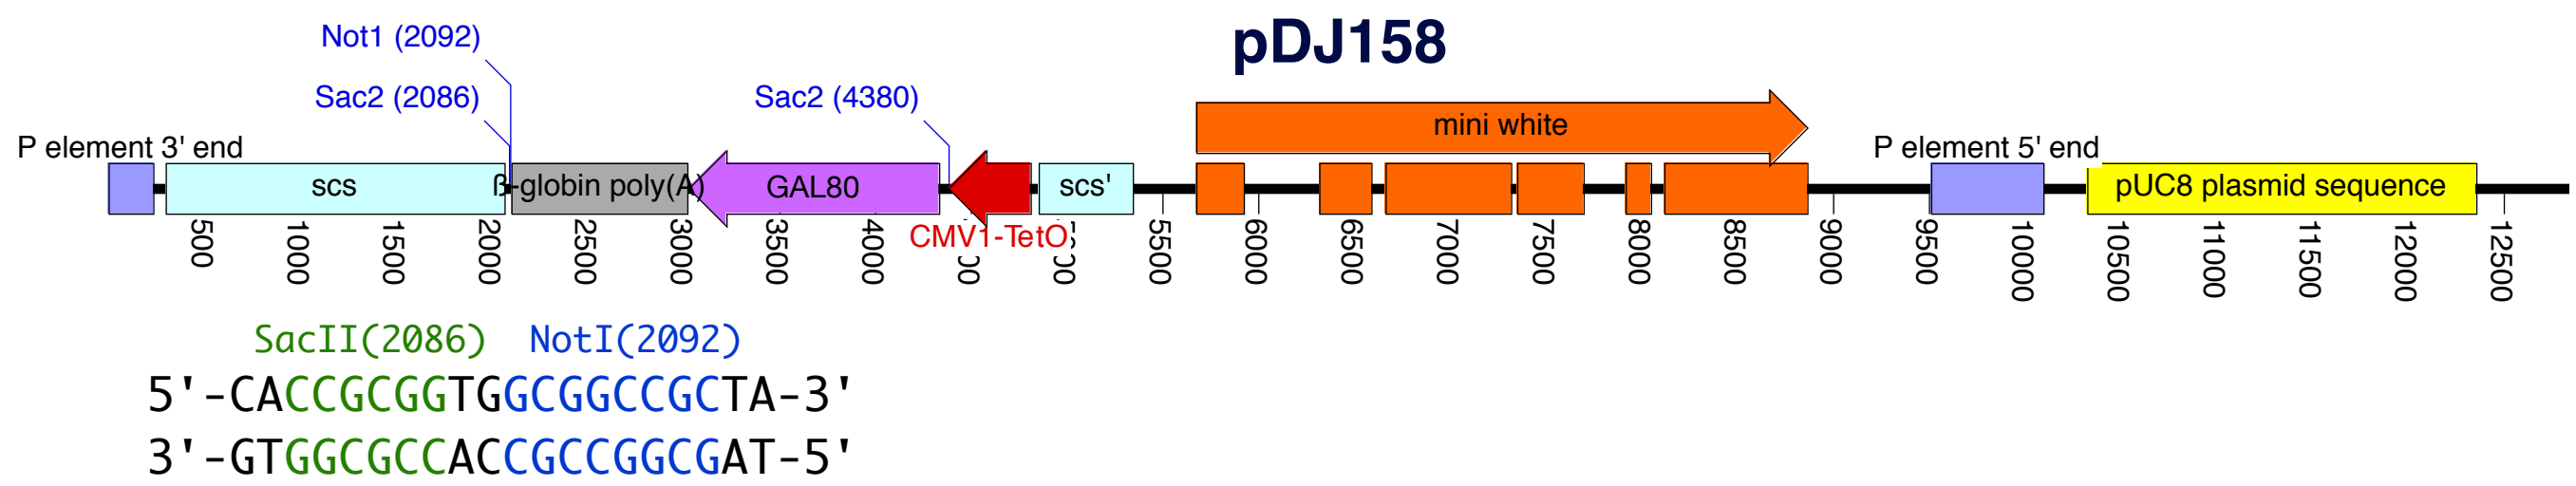

NotI

SacII(2086)  
5' -CACCGCGGTGGC GGCCGCTA-3'  
3' -GTGGCGCCACCGCCGG CGAT-5'

XhoI  
5' -GGCCTCGAGTGCAGC-3'  
3' -AGCTCACGTCGCCGG-5'

Hybridization

DJ188 primer  
5' -GGCCTCGAGTGCAGC-3'  
DJ189 primer  
5' -GGCCGCTGCACTCGA-3'

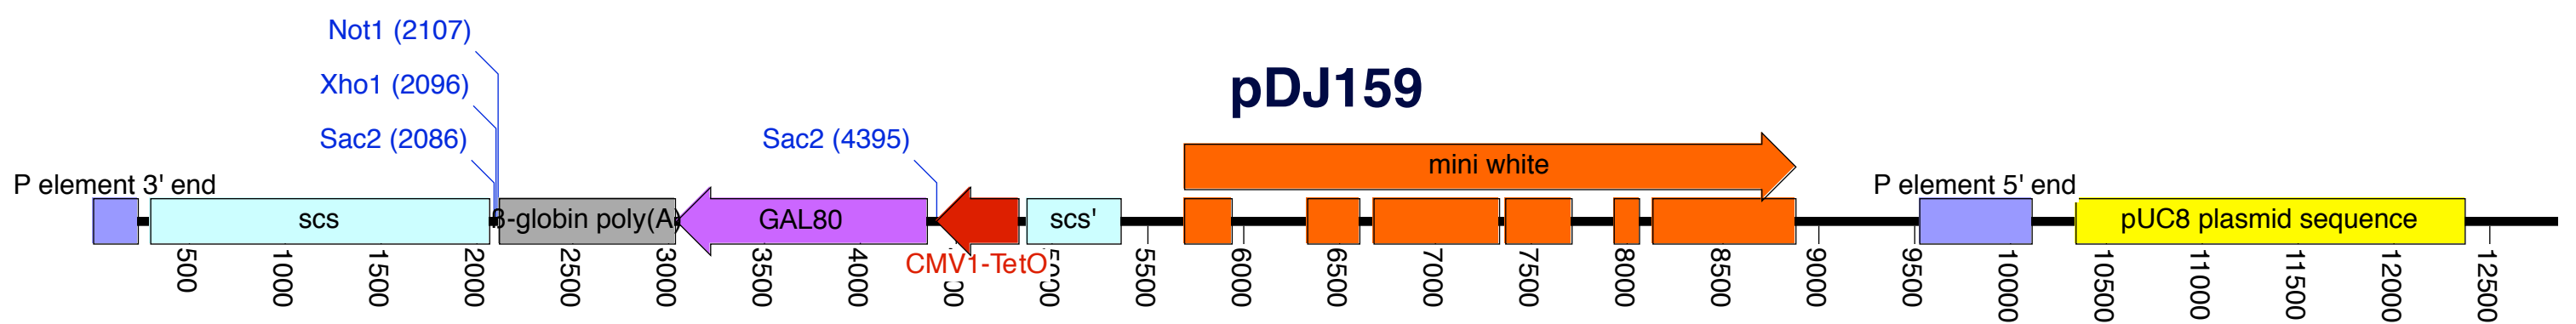

**Supplemental Figure 10** Construction of pDJ159. pDJ158 is a derivative of pDJ138 lacking the *XhoI* between the *TetO* promoter and the *scs'* insulator element.

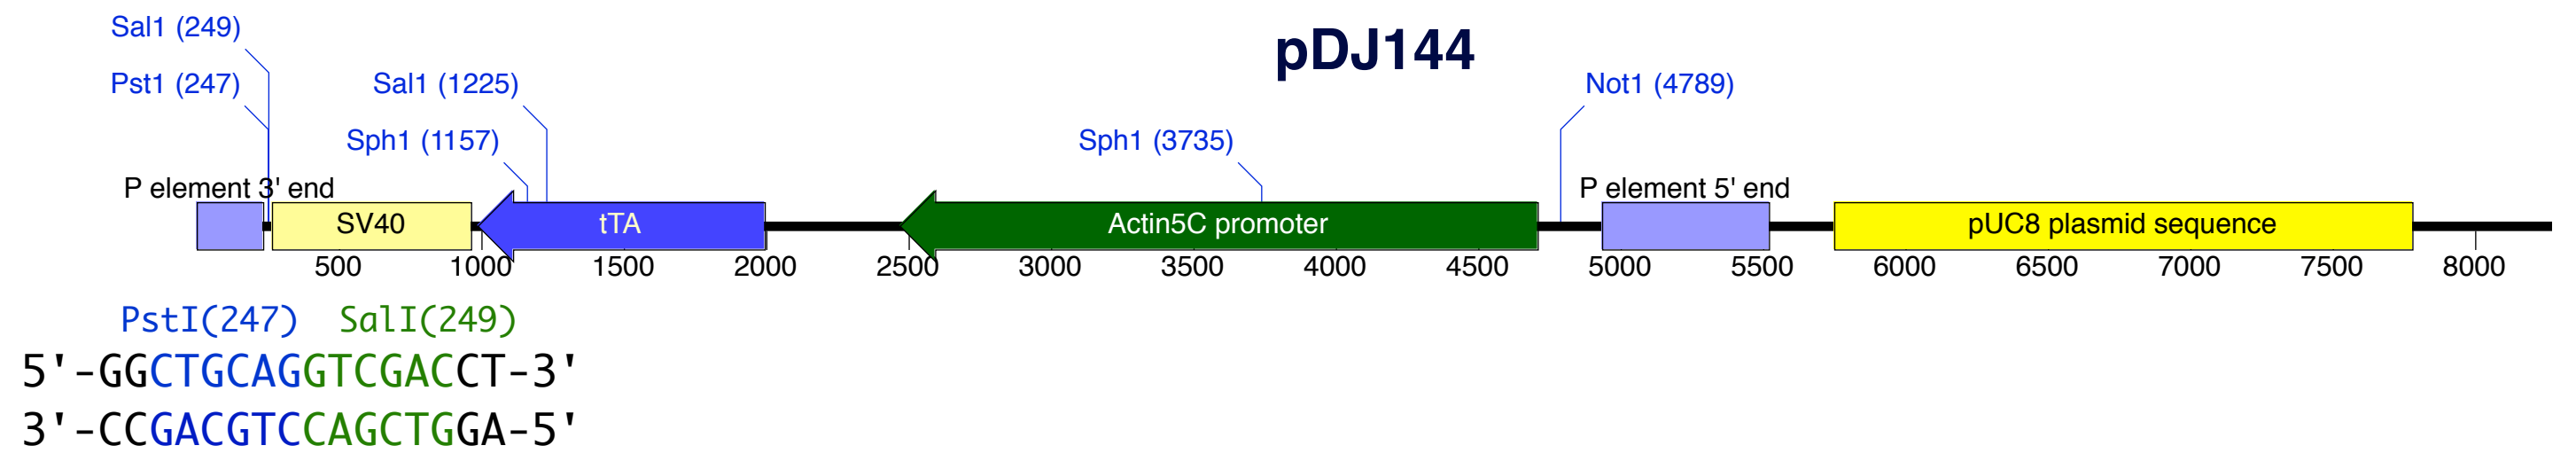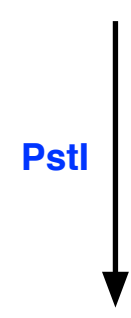

5' -GGCTGCA  
3' -CCG

SalI(249)  
GGTCGACCT-3'  
ACGTCCAGCTGGA-5'

NotI  
5' -GCGGCCGCATGCA-3'  
3' -ACGTCGCCGGCGT-5'

**Hybridization**

**DJ192 primer**  
5' -GCGGCCGCATGCA-3'  
**DJ193 primer**  
5' -TGCGGCCGCTGCA-3'

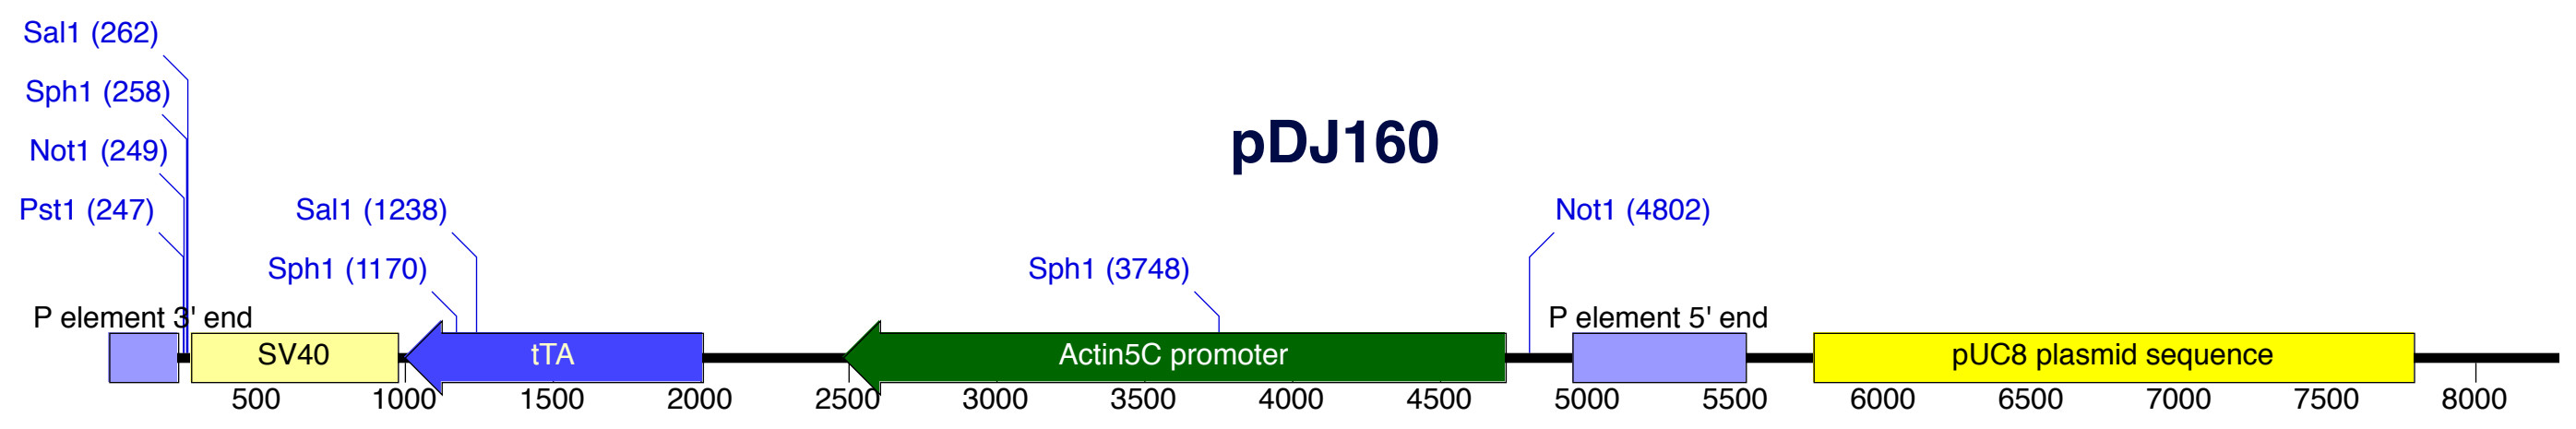

**Supplemental Figure 11 Construction of pDJ160.**

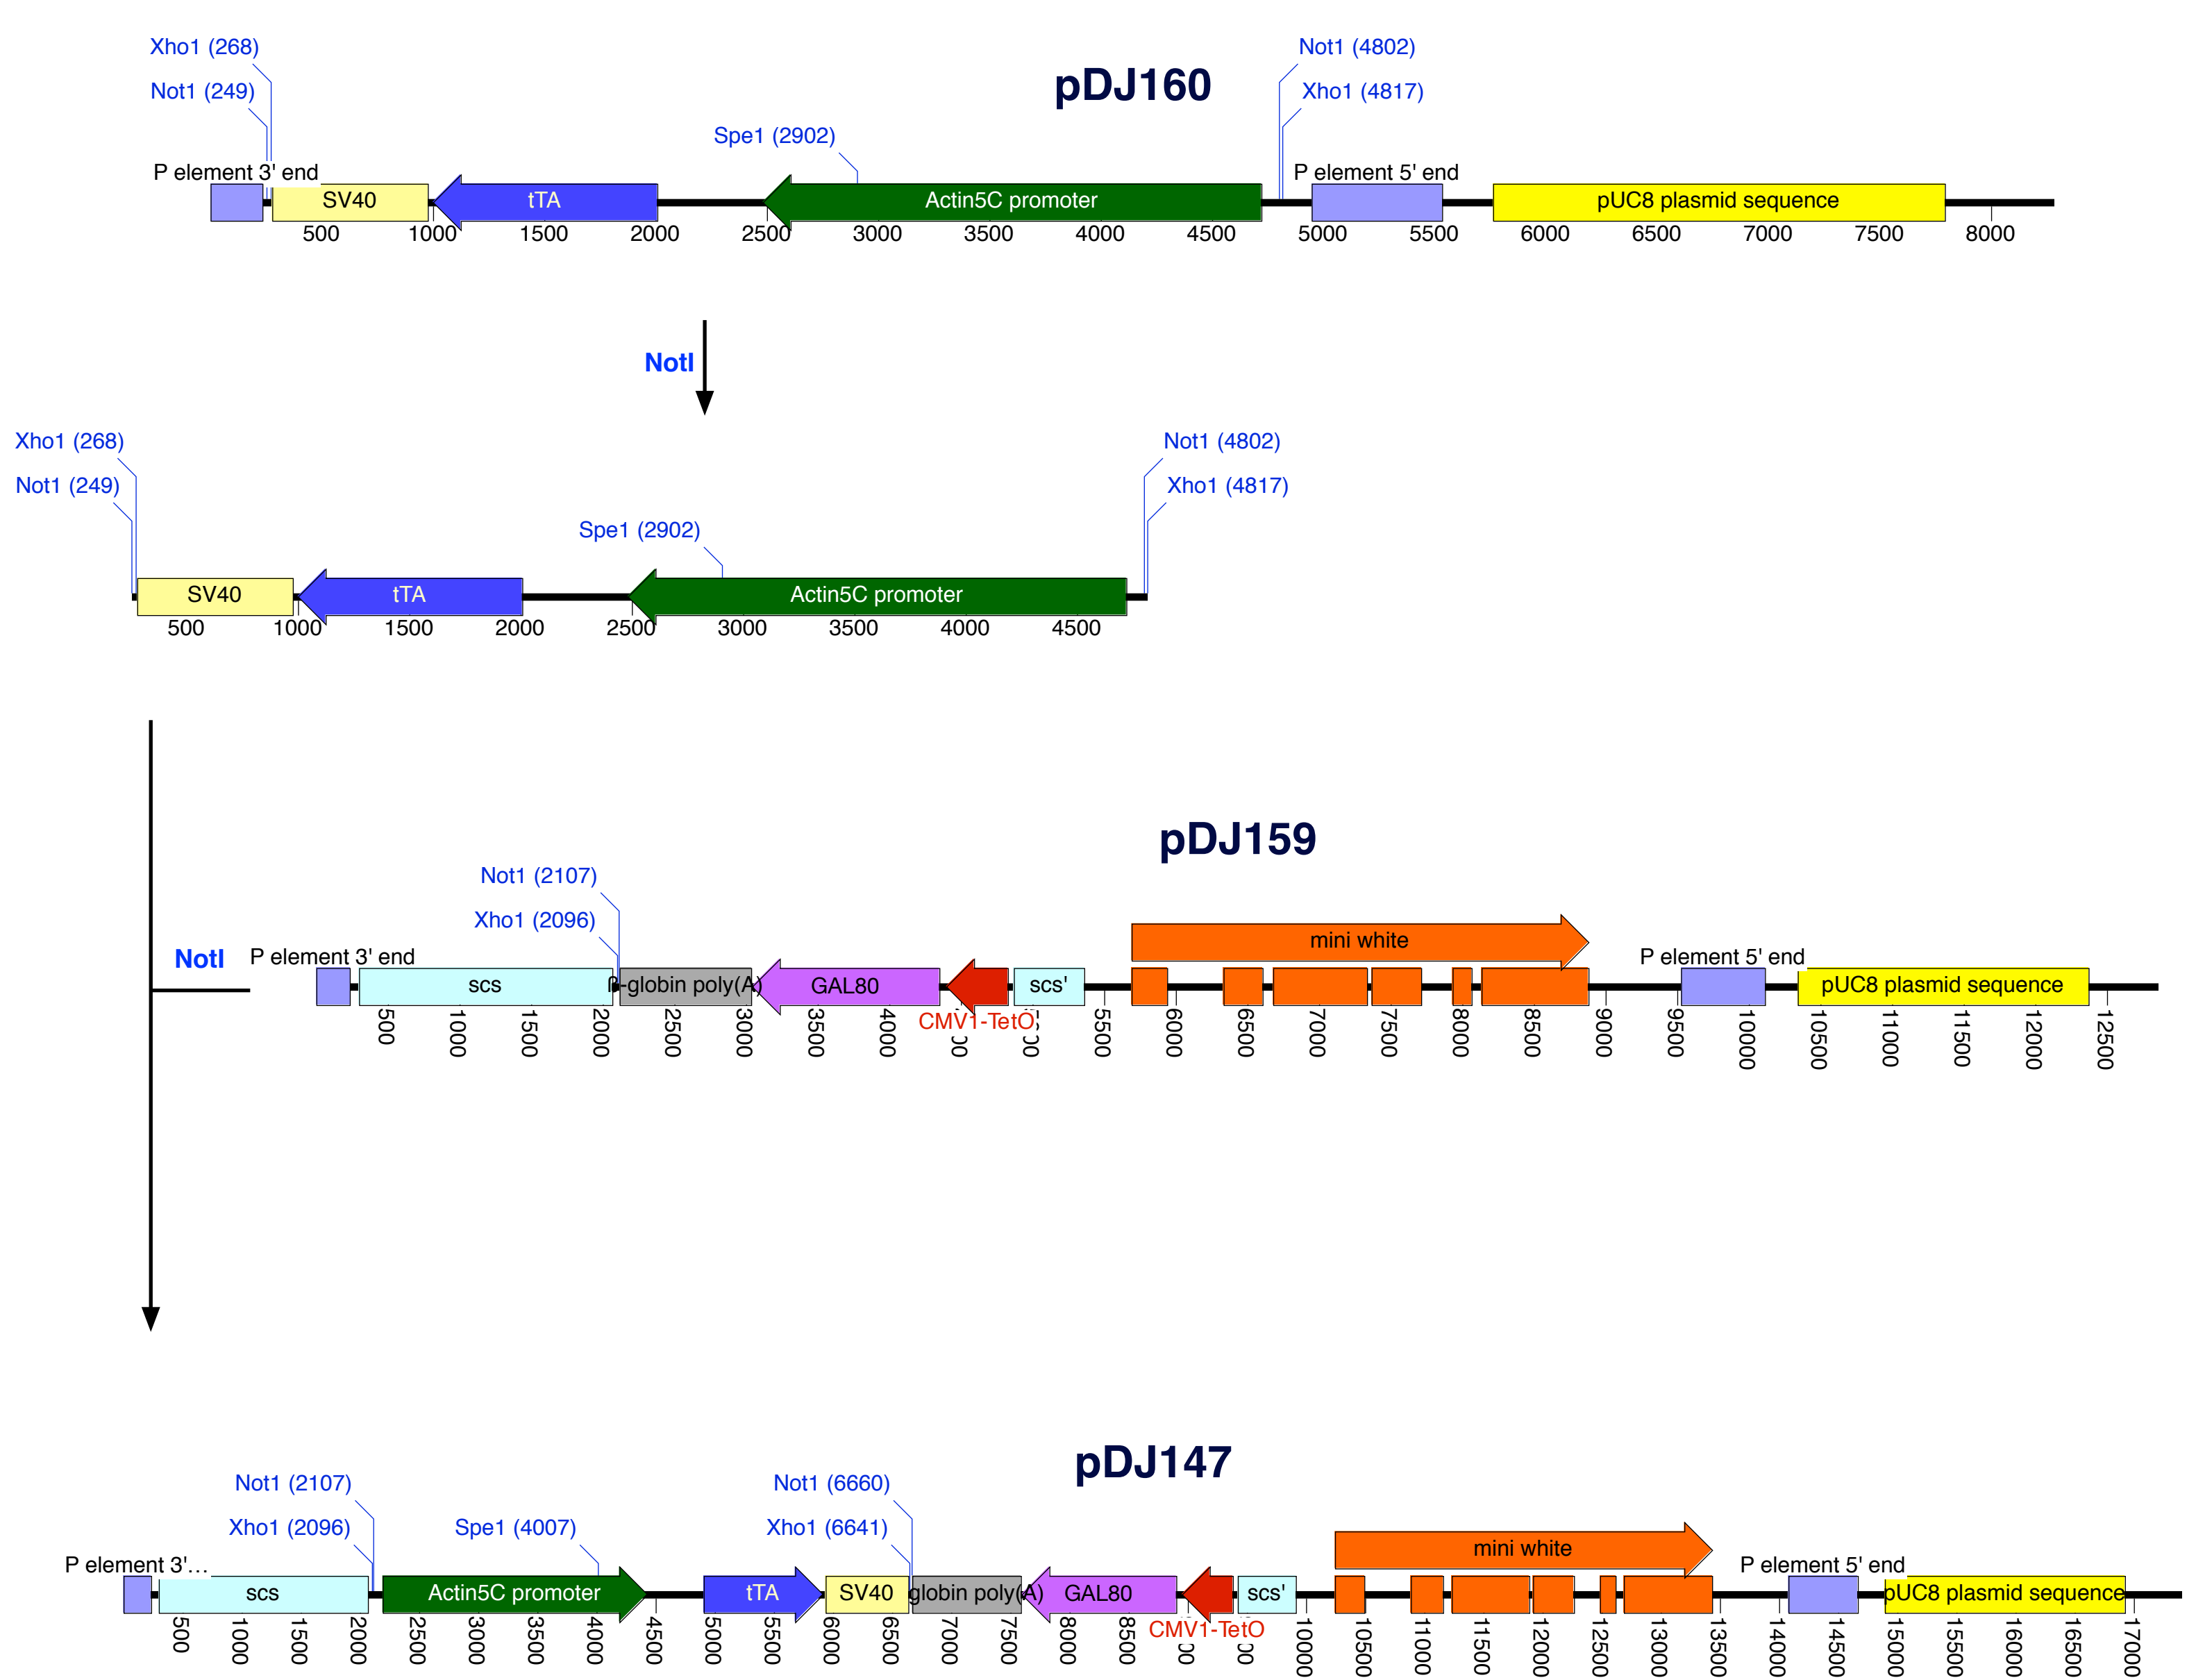

**Supplemental Figure 12 Construction of pDJ147.**

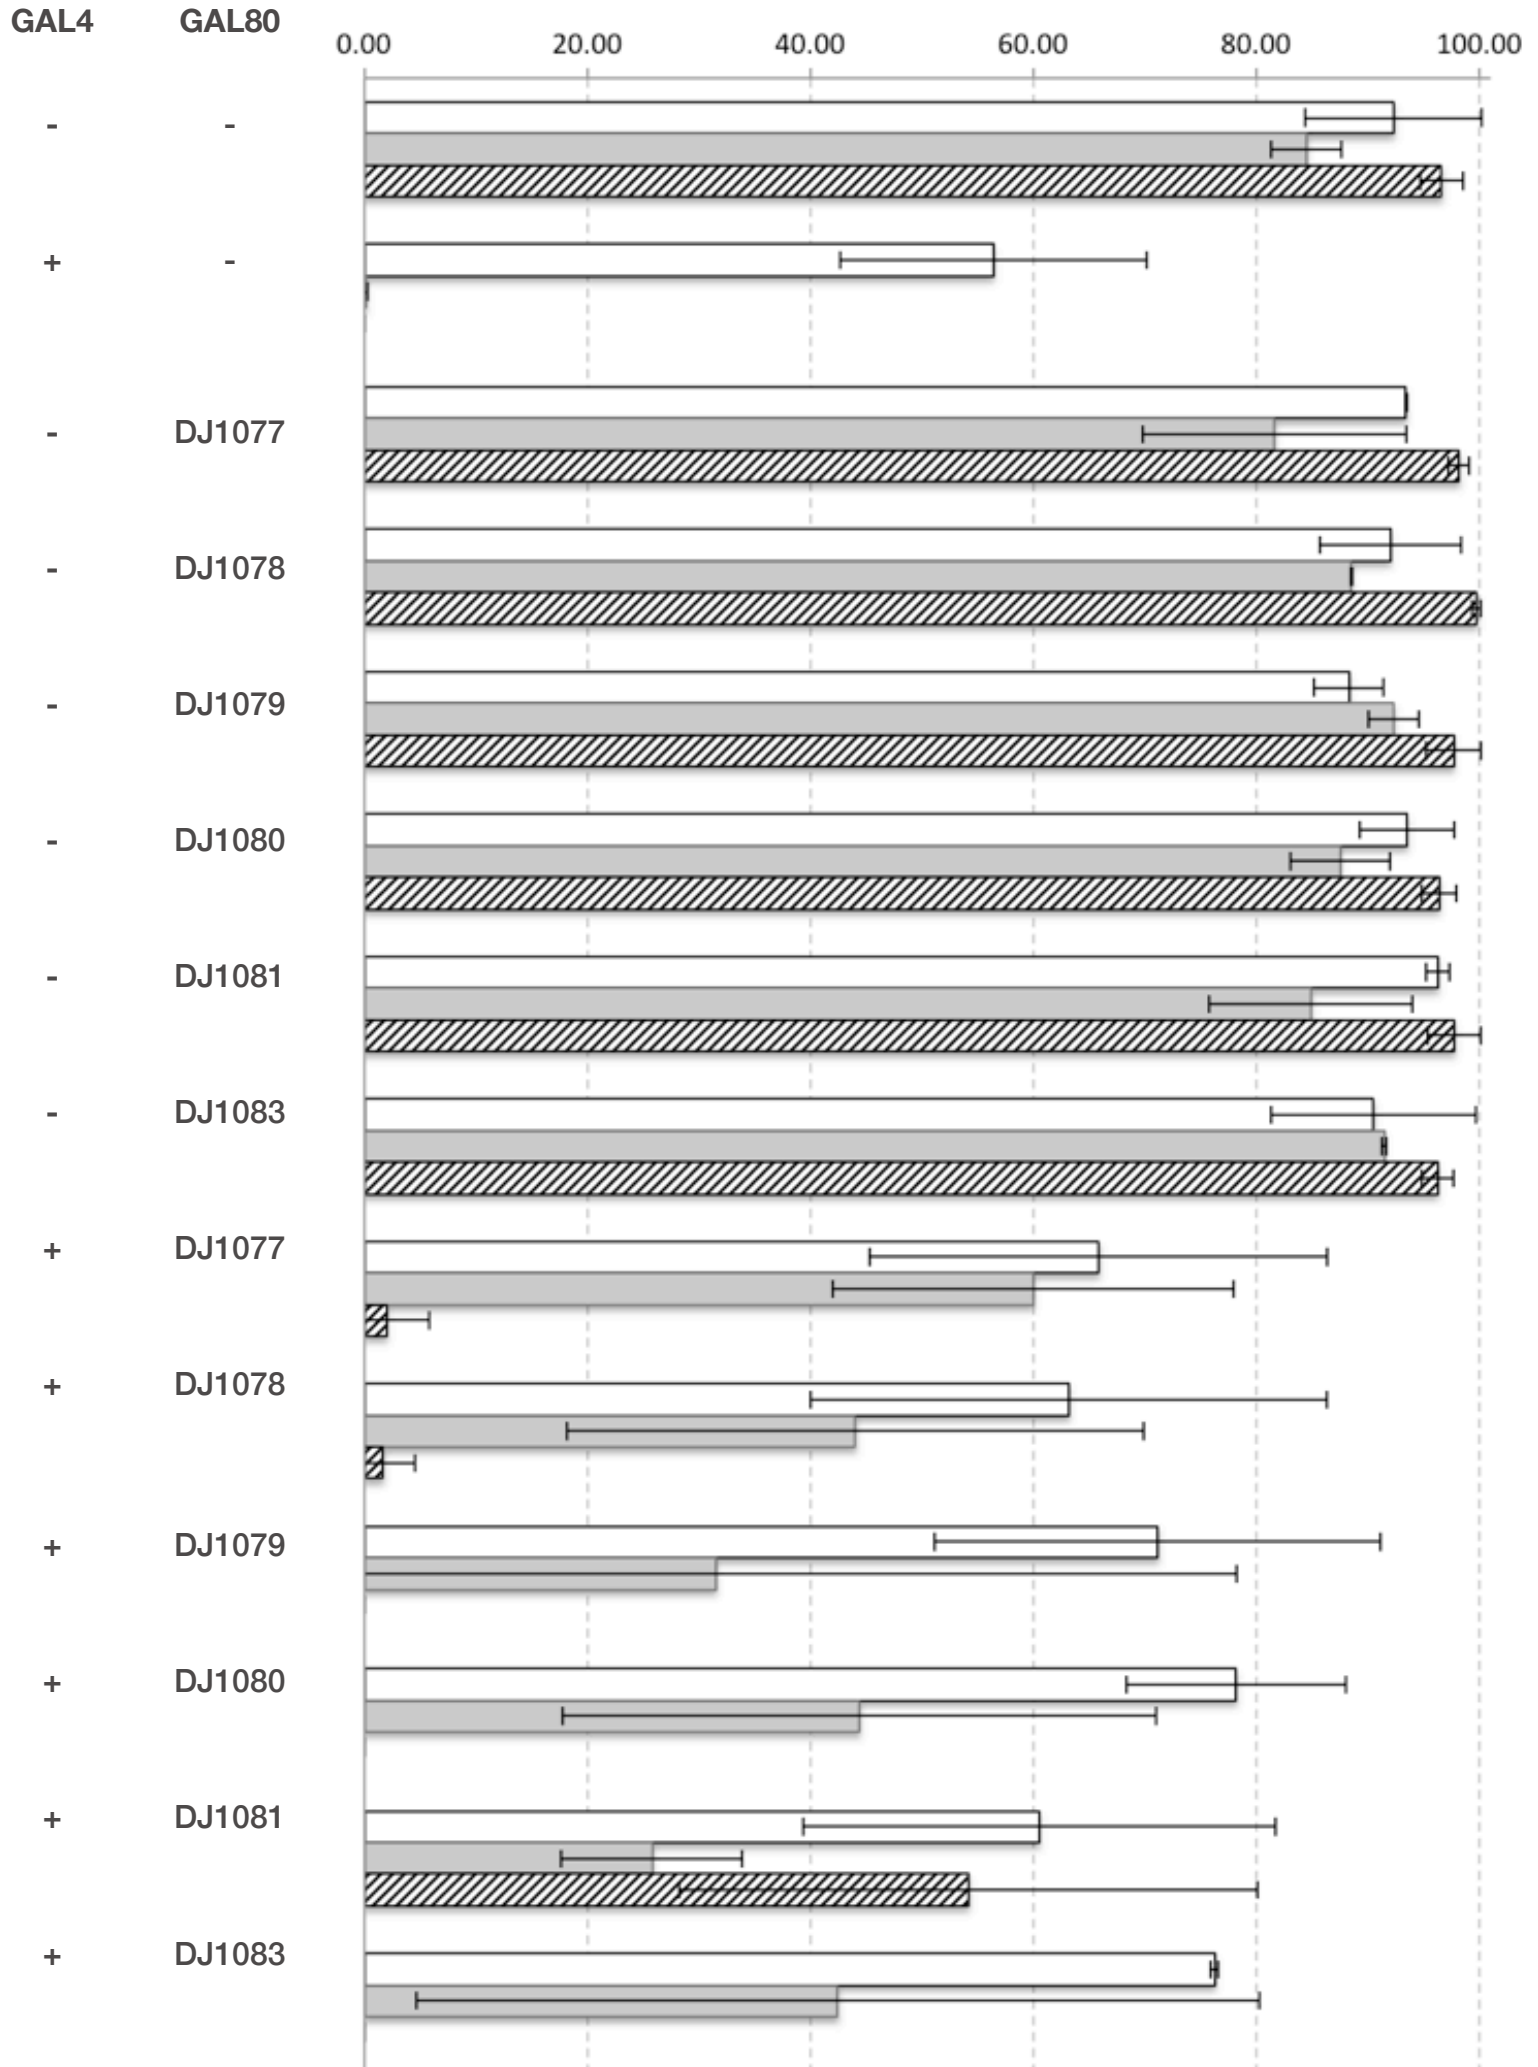

**Supplemental Figure 13** Grim lethality assay of 1 copy DJ146 insertions treated with ampicillin (30µg/ml). Horizontal axes shows average percent survival (% survival calculated as a % of the previous developmental stage). White bars indicate % of L1 larvae, grey bars indicate % of pupae, and striped bars indicate % of adults. Error bars represent  $\pm 2SD$ . Vertical axes indicates genotype, all genotypes contain a UAS-grim transgene but differ by the presence or absence of GAL4 and GAL80 insertion. GAL4 column displays presence (+) or absence (-) of GAL4 in the genotype, and the GAL80 column indicates the DJ146 insertion or an absence (-) of GAL80.

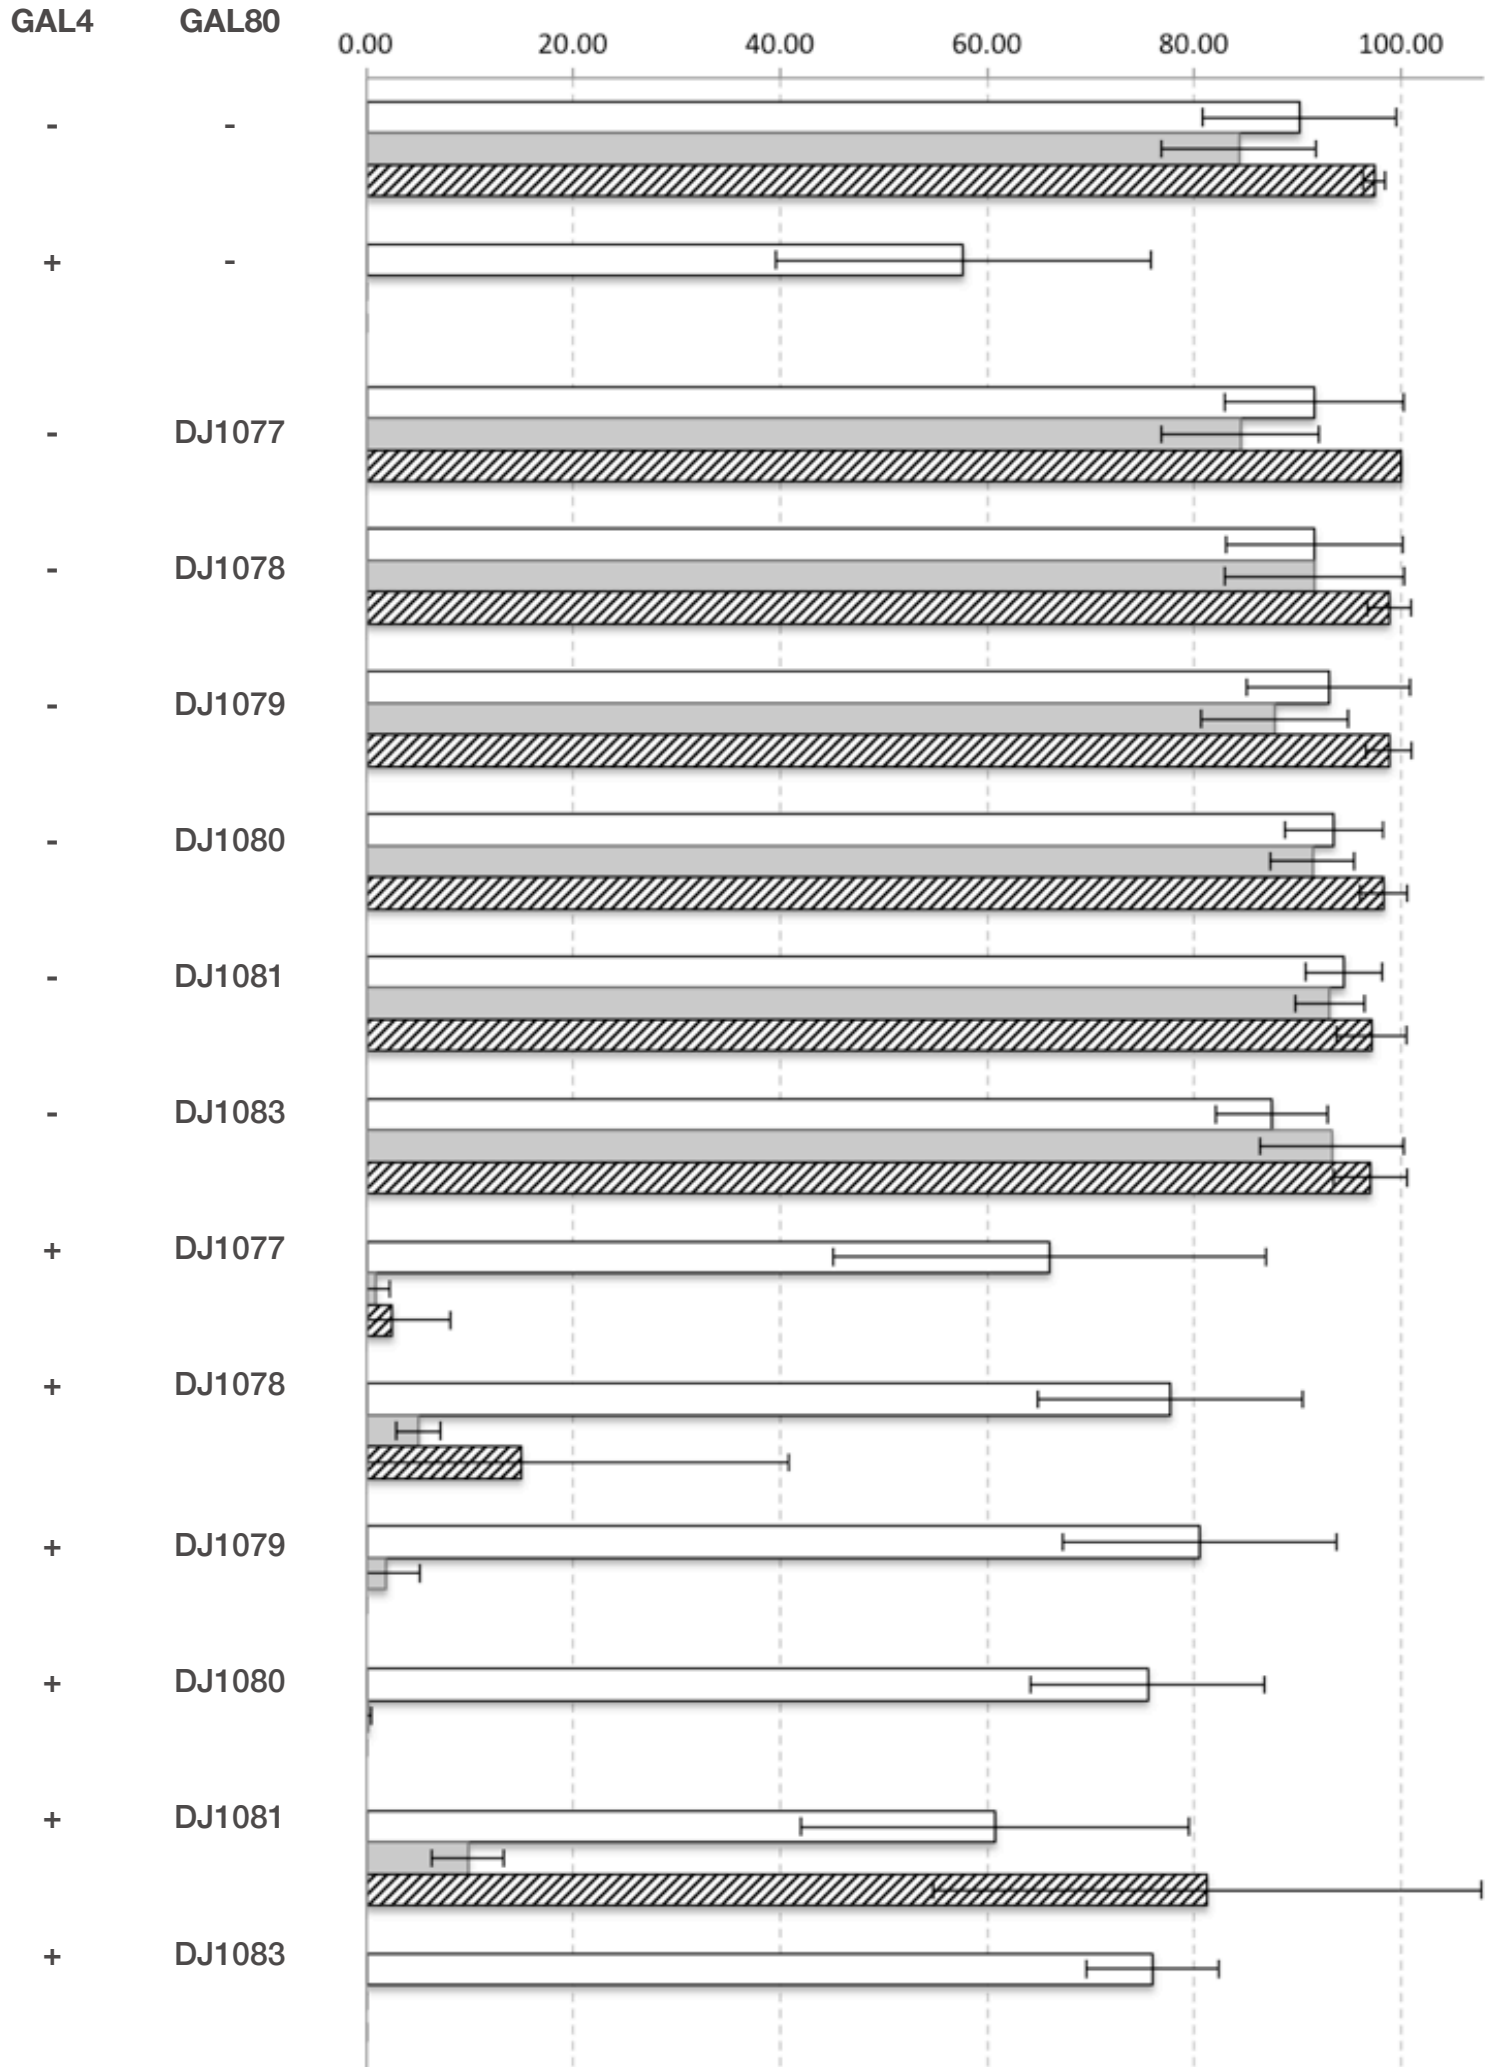

**Supplemental Figure 14** Grim lethality assay of 1 copy DJ146 insertions treated with ampicillin (30µg/ml) and tetracycline (50µg/ml). Horizontal axes shows average percent survival (% survival calculated as a % of the previous developmental stage). White bars indicate % of L1 larvae, grey bars indicate % of pupae, and striped bars indicate % of adults. Error bars represent  $\pm 2SD$ . Vertical axes indicates genotype, all genotypes contain a UAS-grim transgene but differ by the presence or absence of GAL4 and GAL80 insertion. GAL4 column displays presence (+) or absence (-) of GAL4 in the genotype, and the GAL80 column indicates the DJ146 insertion or an absence (-) of GAL80.



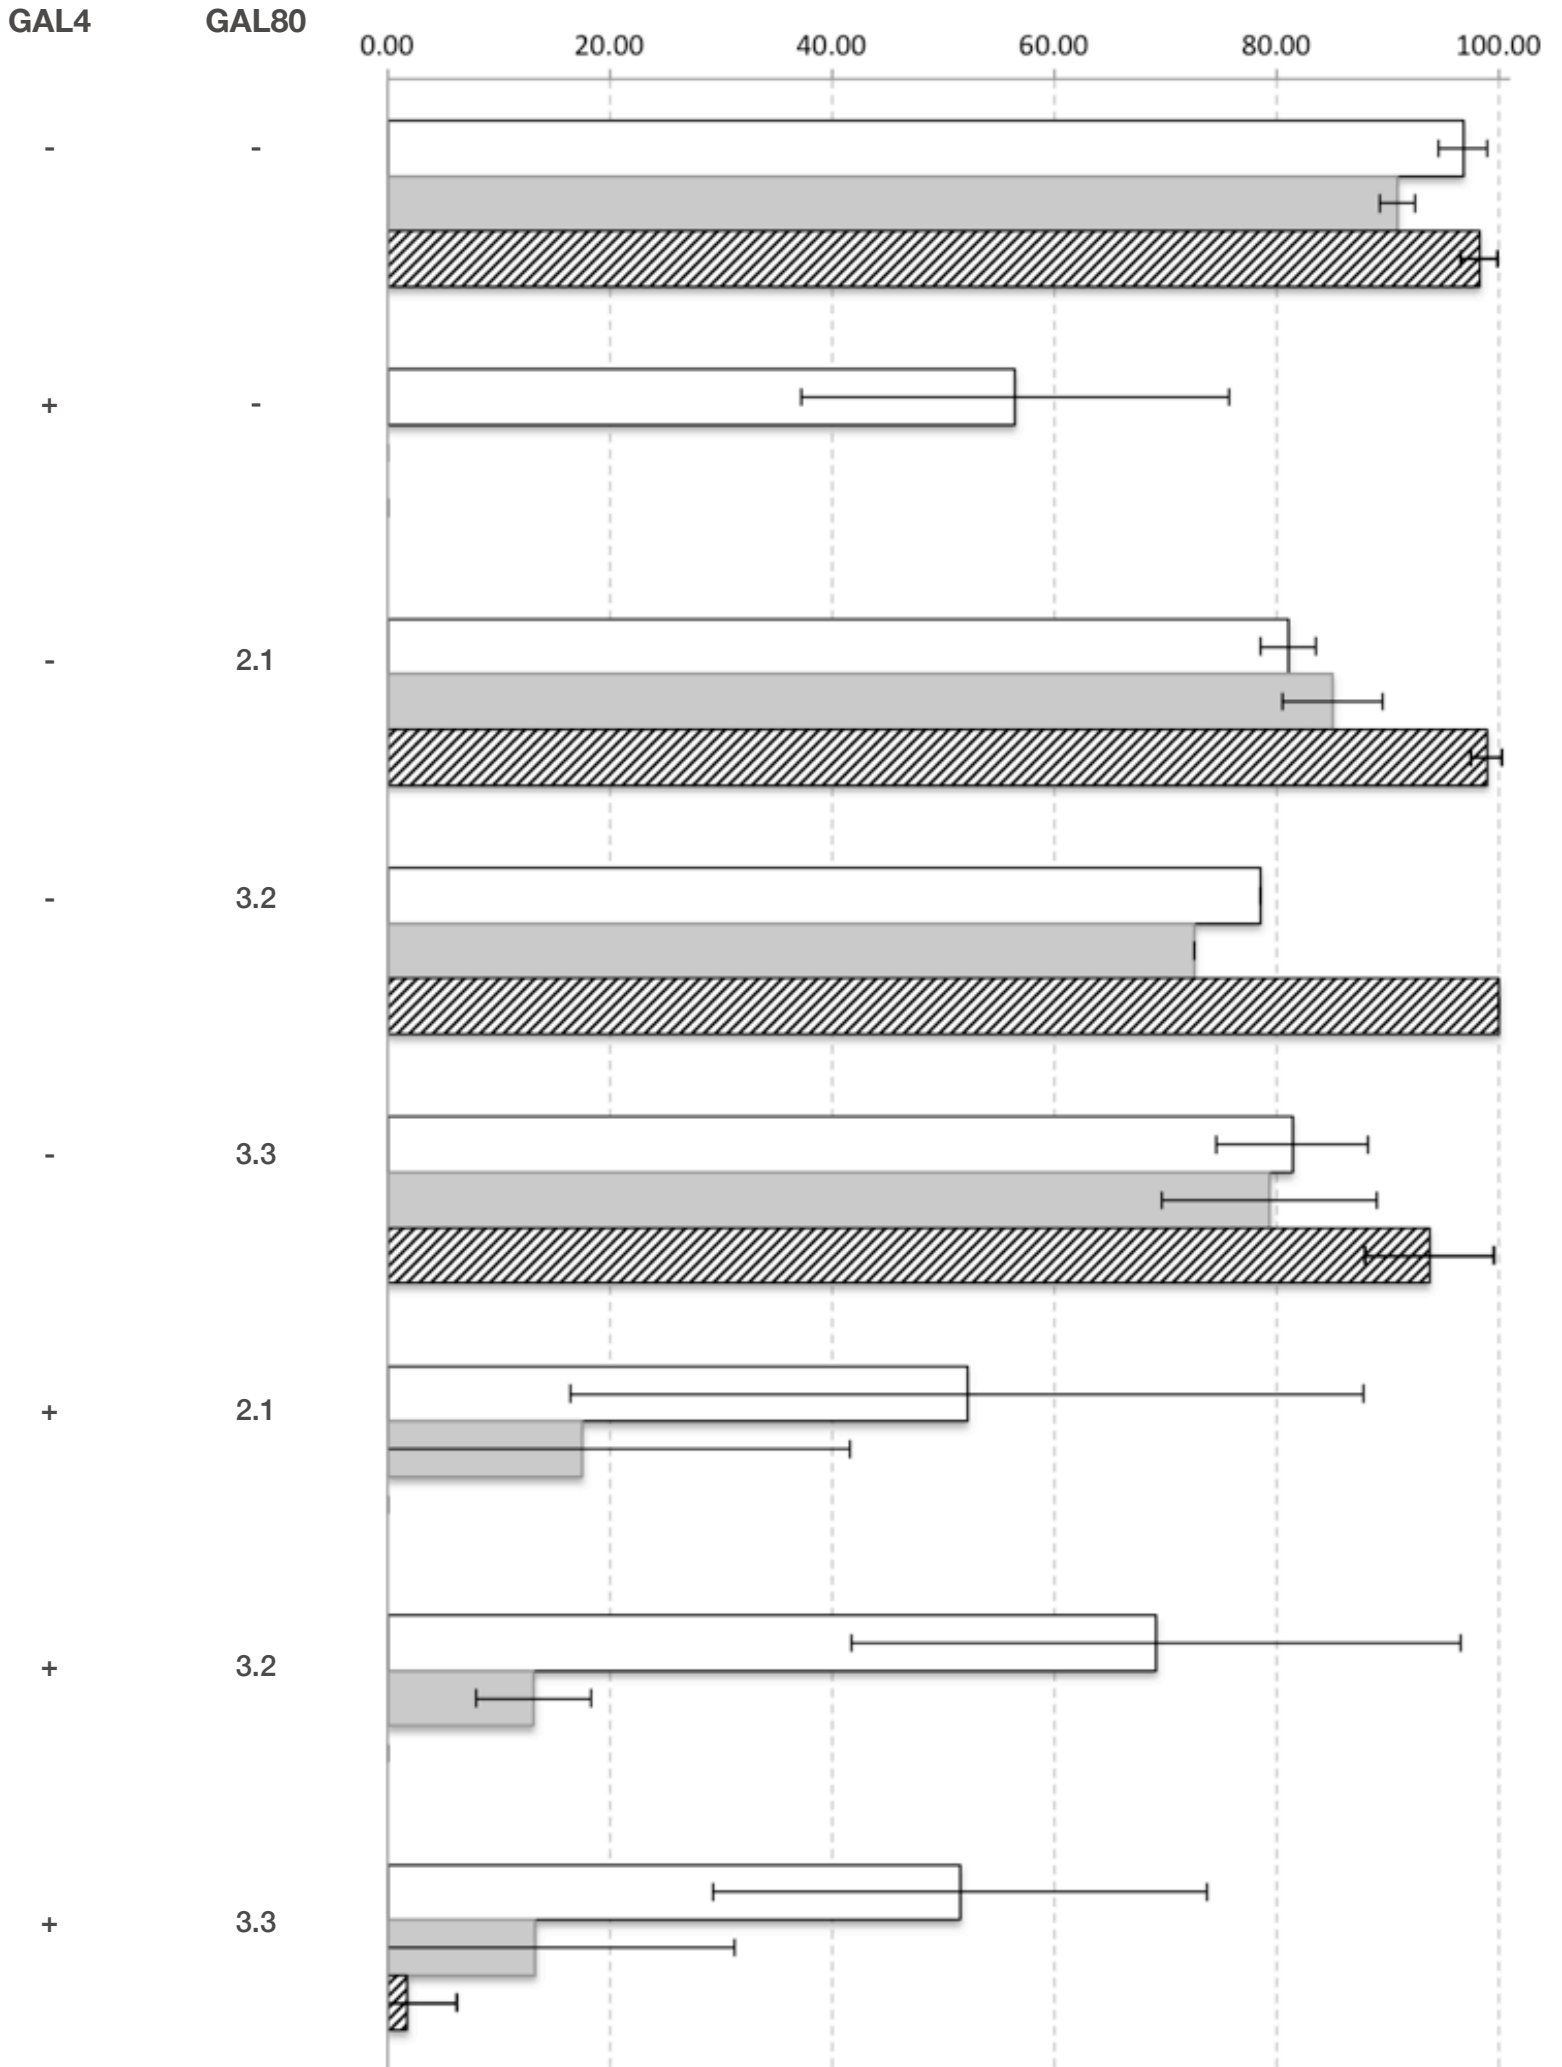

**Supplemental Figure 15** Grim lethality assay of 1 copy of DJ147 insertion treated with ampicillin (30µg/ml). Horizontal axes shows average percent survival (% survival calculated as a % of the previous developmental stage). White bars indicate % of L1 larvae, grey bars indicate % of pupae, and striped bars indicate % of adults. Error bars represent  $\pm 2SD$ . Vertical axes indicates genotype, all genotypes contain a UAS-grim transgene but differ by the presence or absence of GAL4 and GAL80 insertion. GAL4 column displays presence (+) or absence (-) of GAL4 in the genotype, and the GAL80 column indicates the DJ147 insertion or an absence (-) of GAL80.

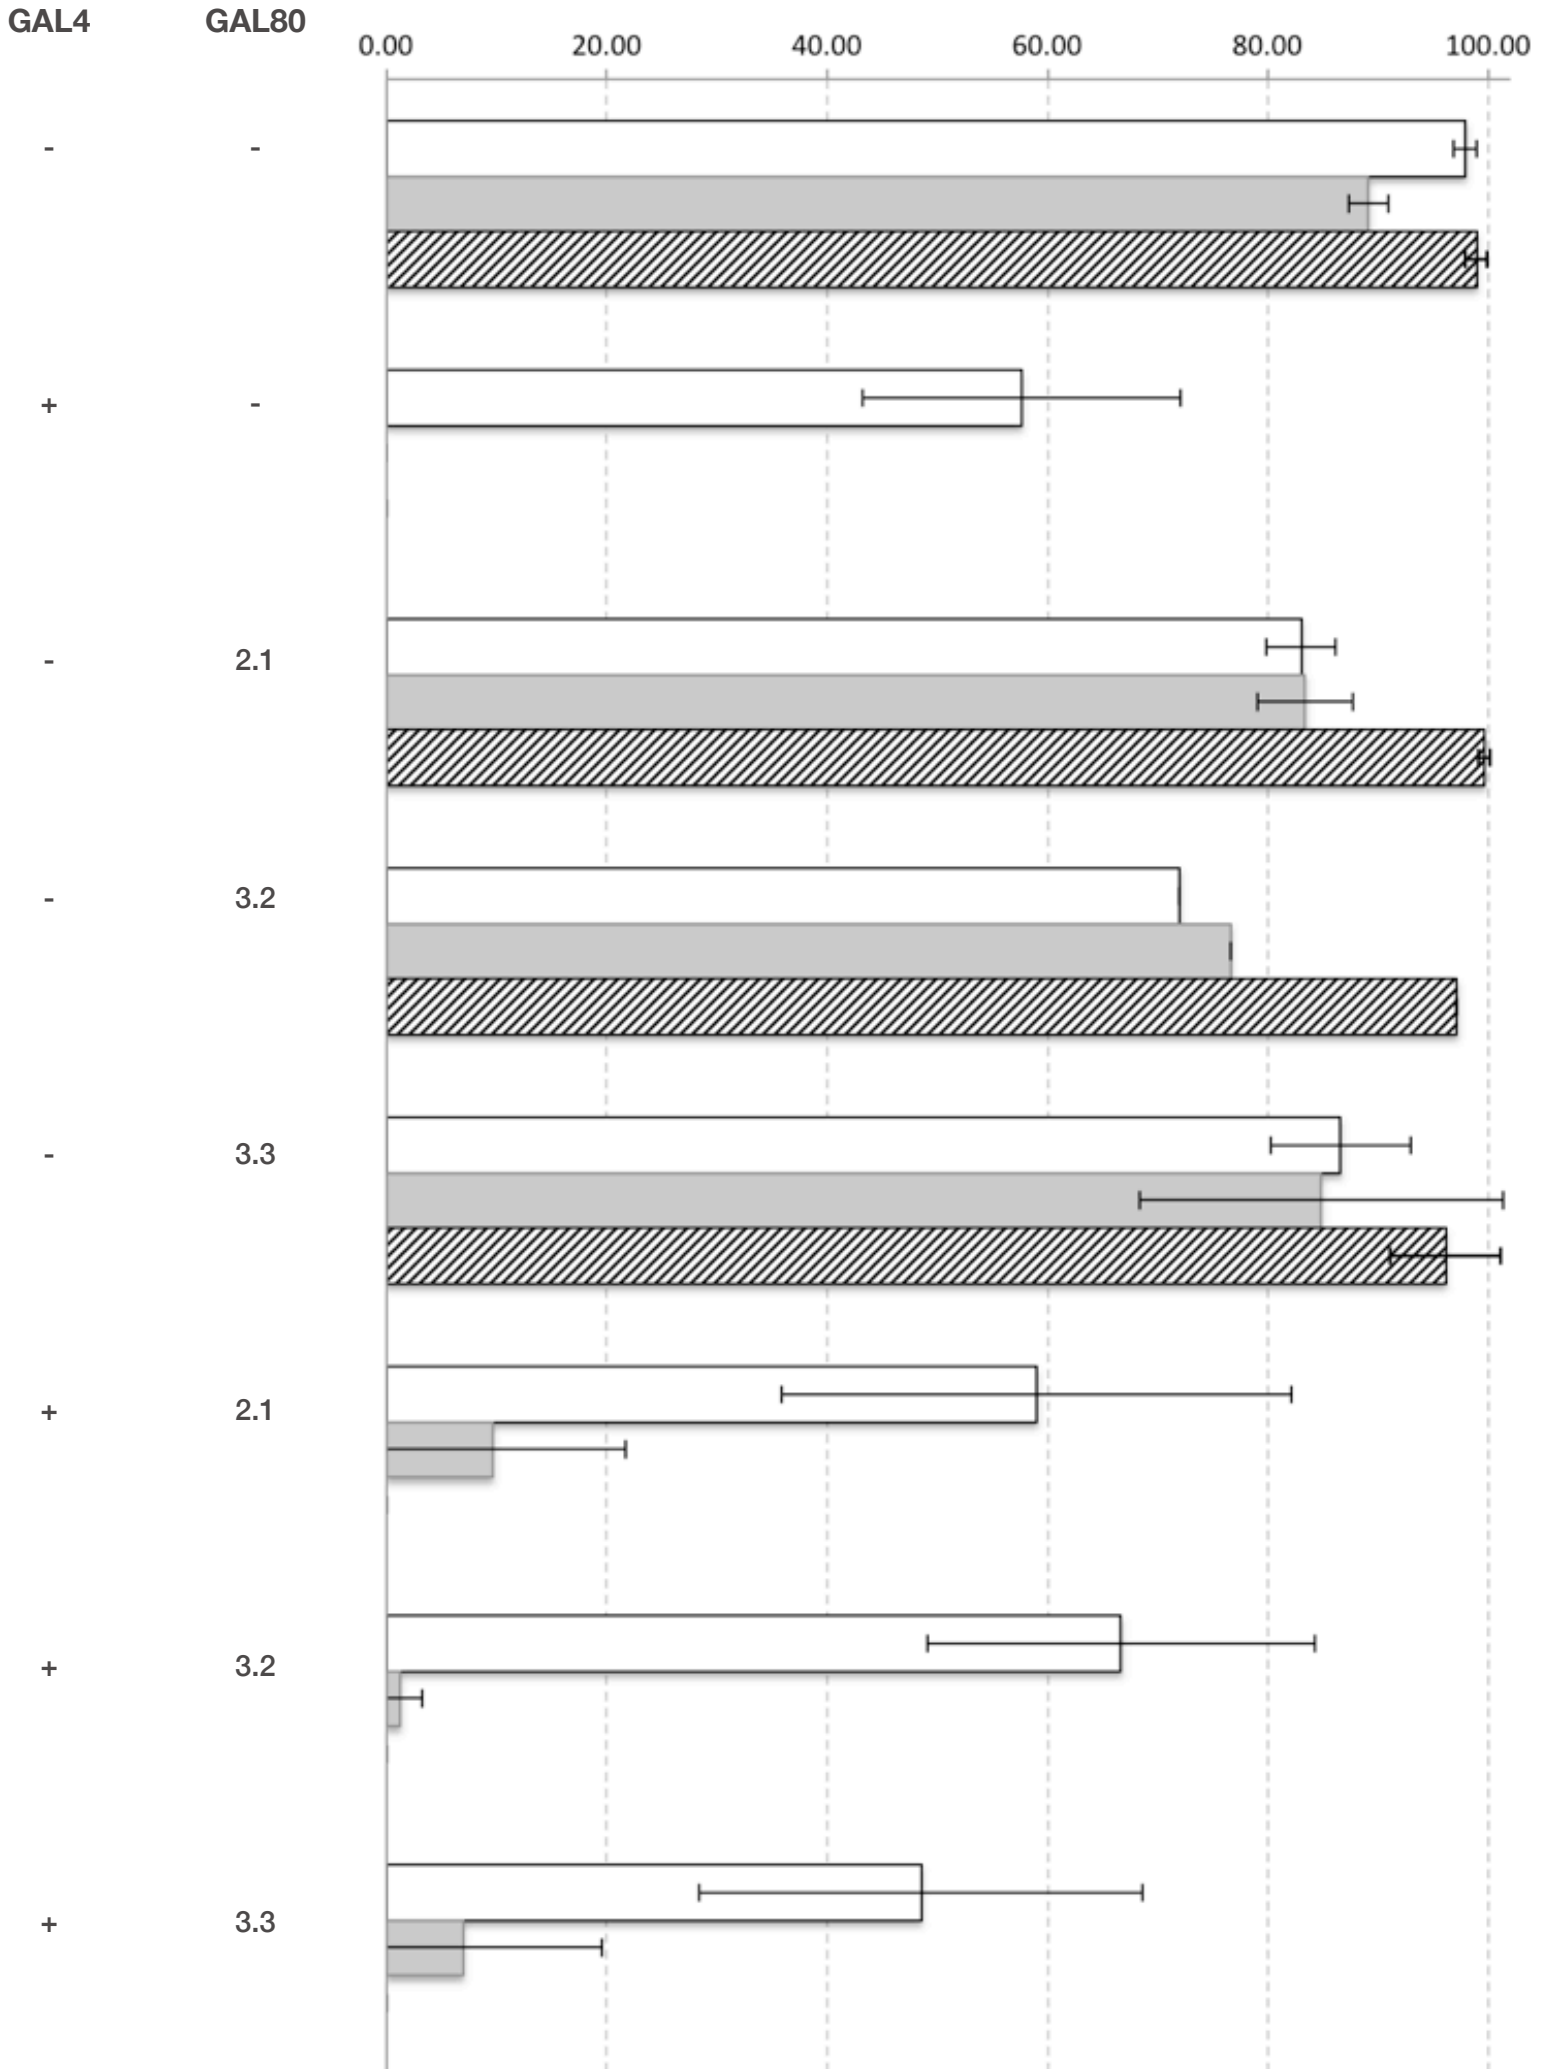

**Supplemental Figure 16** Grim lethality assay of 1 copy of DJ147 insertion treated with ampicillin (30 $\mu$ g/ml) and tetracycline (50 $\mu$ g/ml). Horizontal axes shows average percent survival (% survival calculated as a % of the previous developmental stage). White bars indicate % of L1 larvae, grey bars indicate % of pupae, and striped bars indicate % of adults. Error bars represent  $\pm 2SD$ . Vertical axes indicates genotype, all genotypes contain a UAS-grim transgene but differ by the presence or absence of GAL4 and GAL80 insertion. GAL4 column displays presence (+) or absence (-) of GAL4 in the genotype, and the GAL80 column indicates the DJ147 insertion or an absence (-) of GAL80.



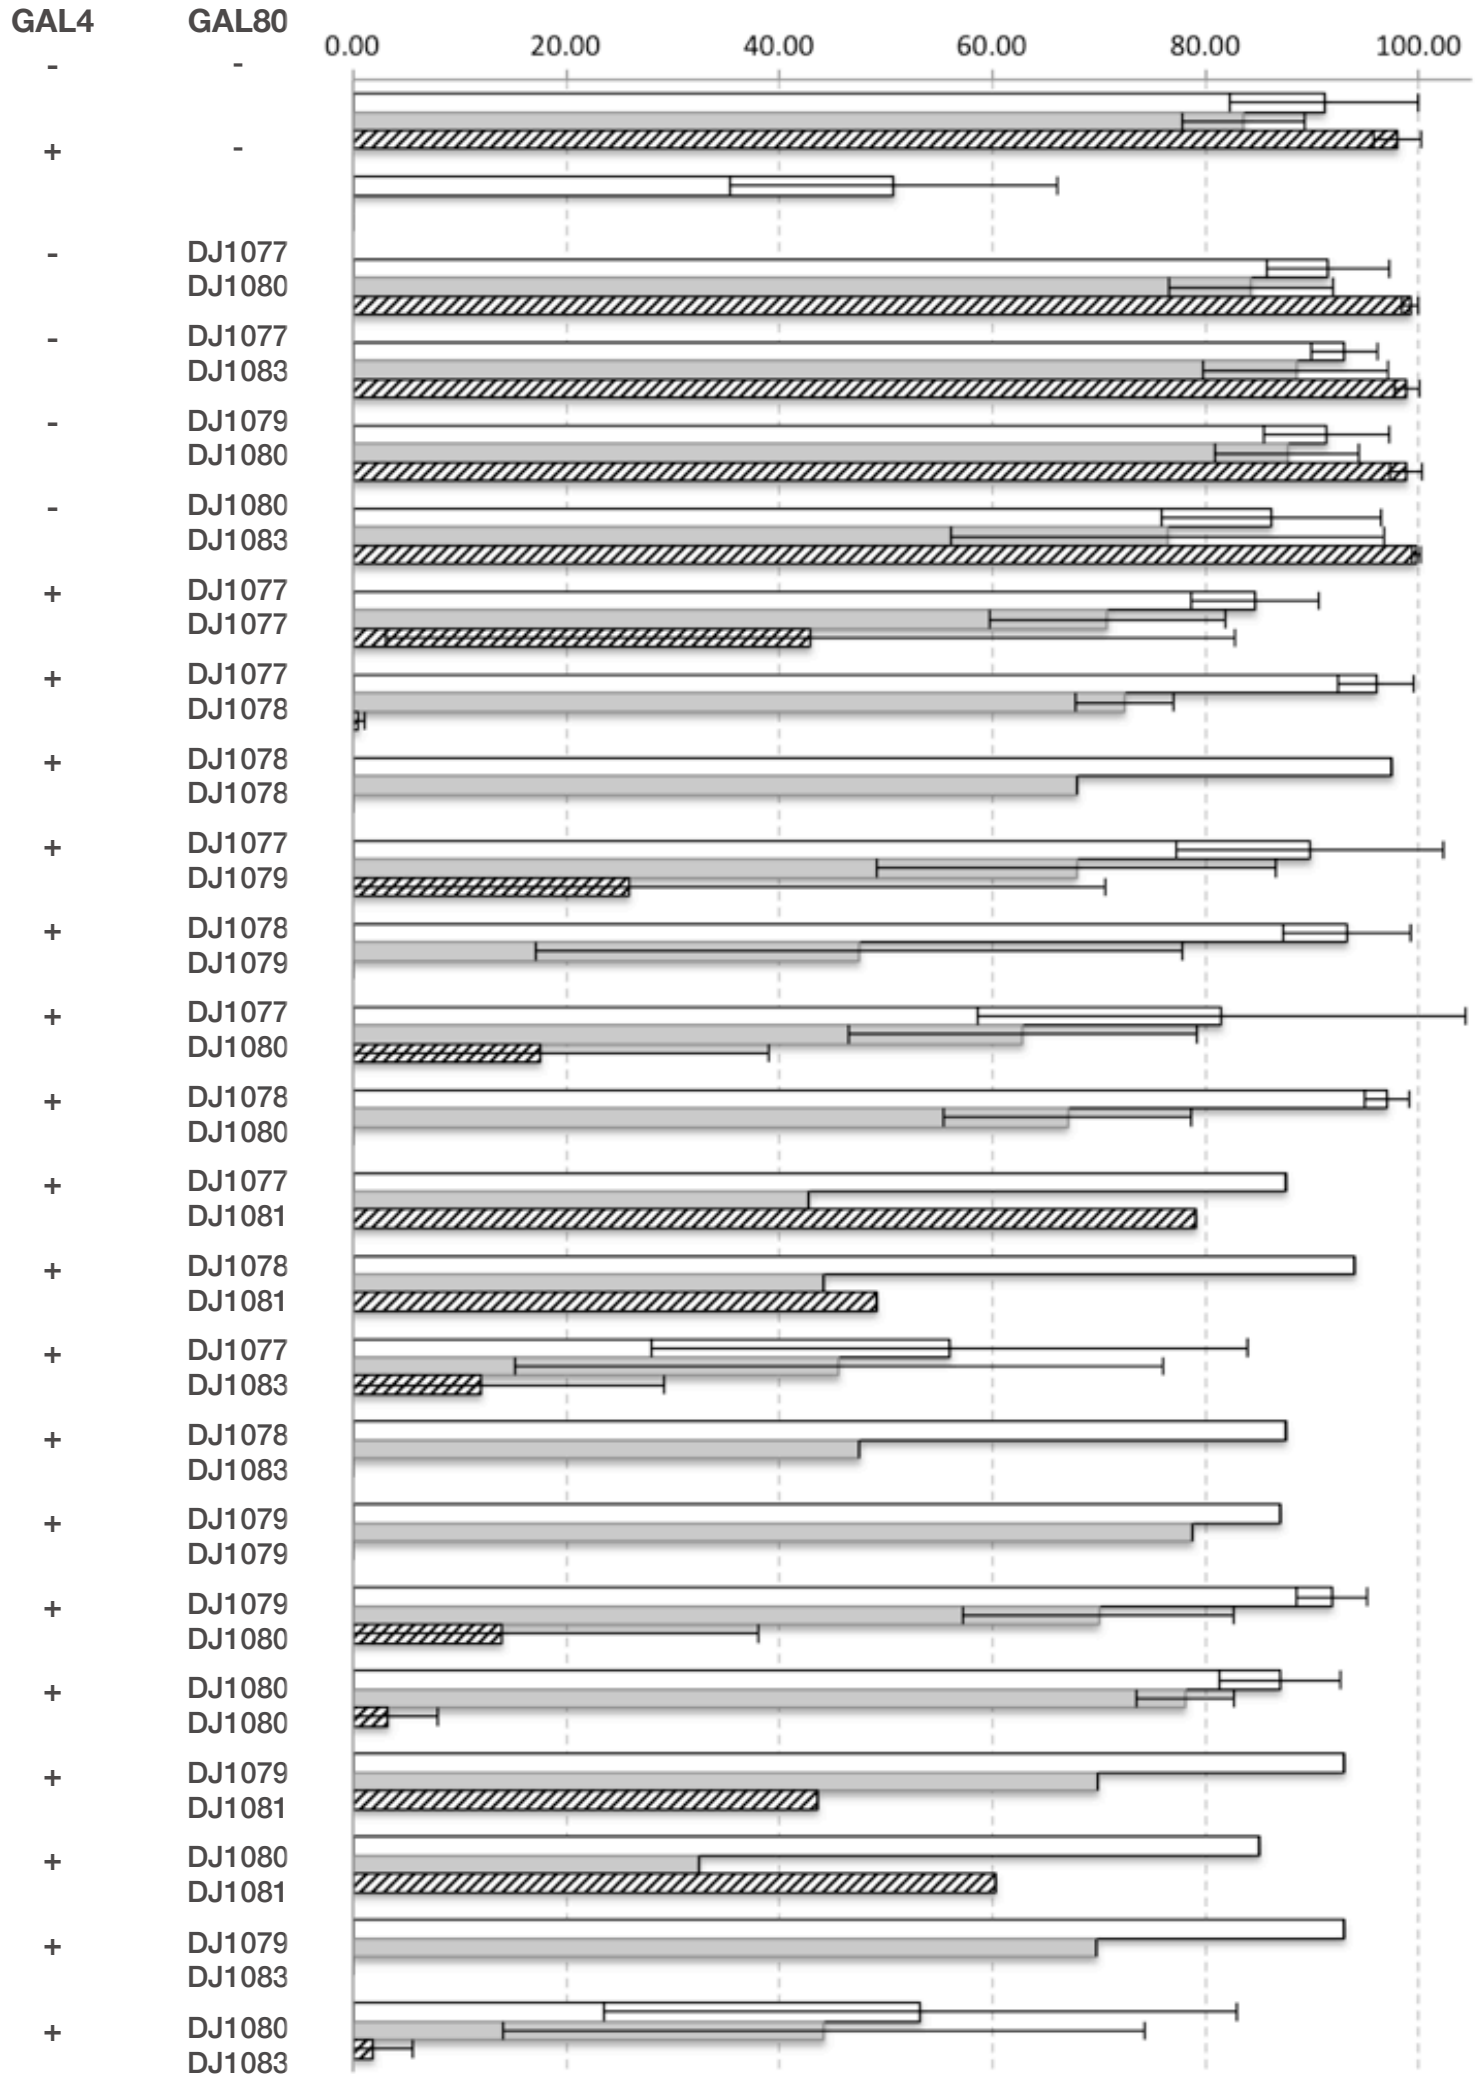

**Supplemental Figure 17** Grim lethality assay of 2 copies of DJ146 insertions treated with ampicillin (30µg/ml). Horizontal axes shows average percent survival (% survival calculated as a % of the previous developmental stage). White bars indicate % of L1 larvae, grey bars indicate % of pupae, and striped bars indicate % of adults. Error bars represent  $\pm 2SD$ . Vertical axes indicates genotype, all genotypes contain a UAS-grim transgene but differ by the presence or absence of GAL4 and GAL80 insertion. GAL4 column displays presence (+) or absence (-) of GAL4 in the genotype, and the GAL80 column indicates the DJ146 insertions or an absence (-) of GAL80.

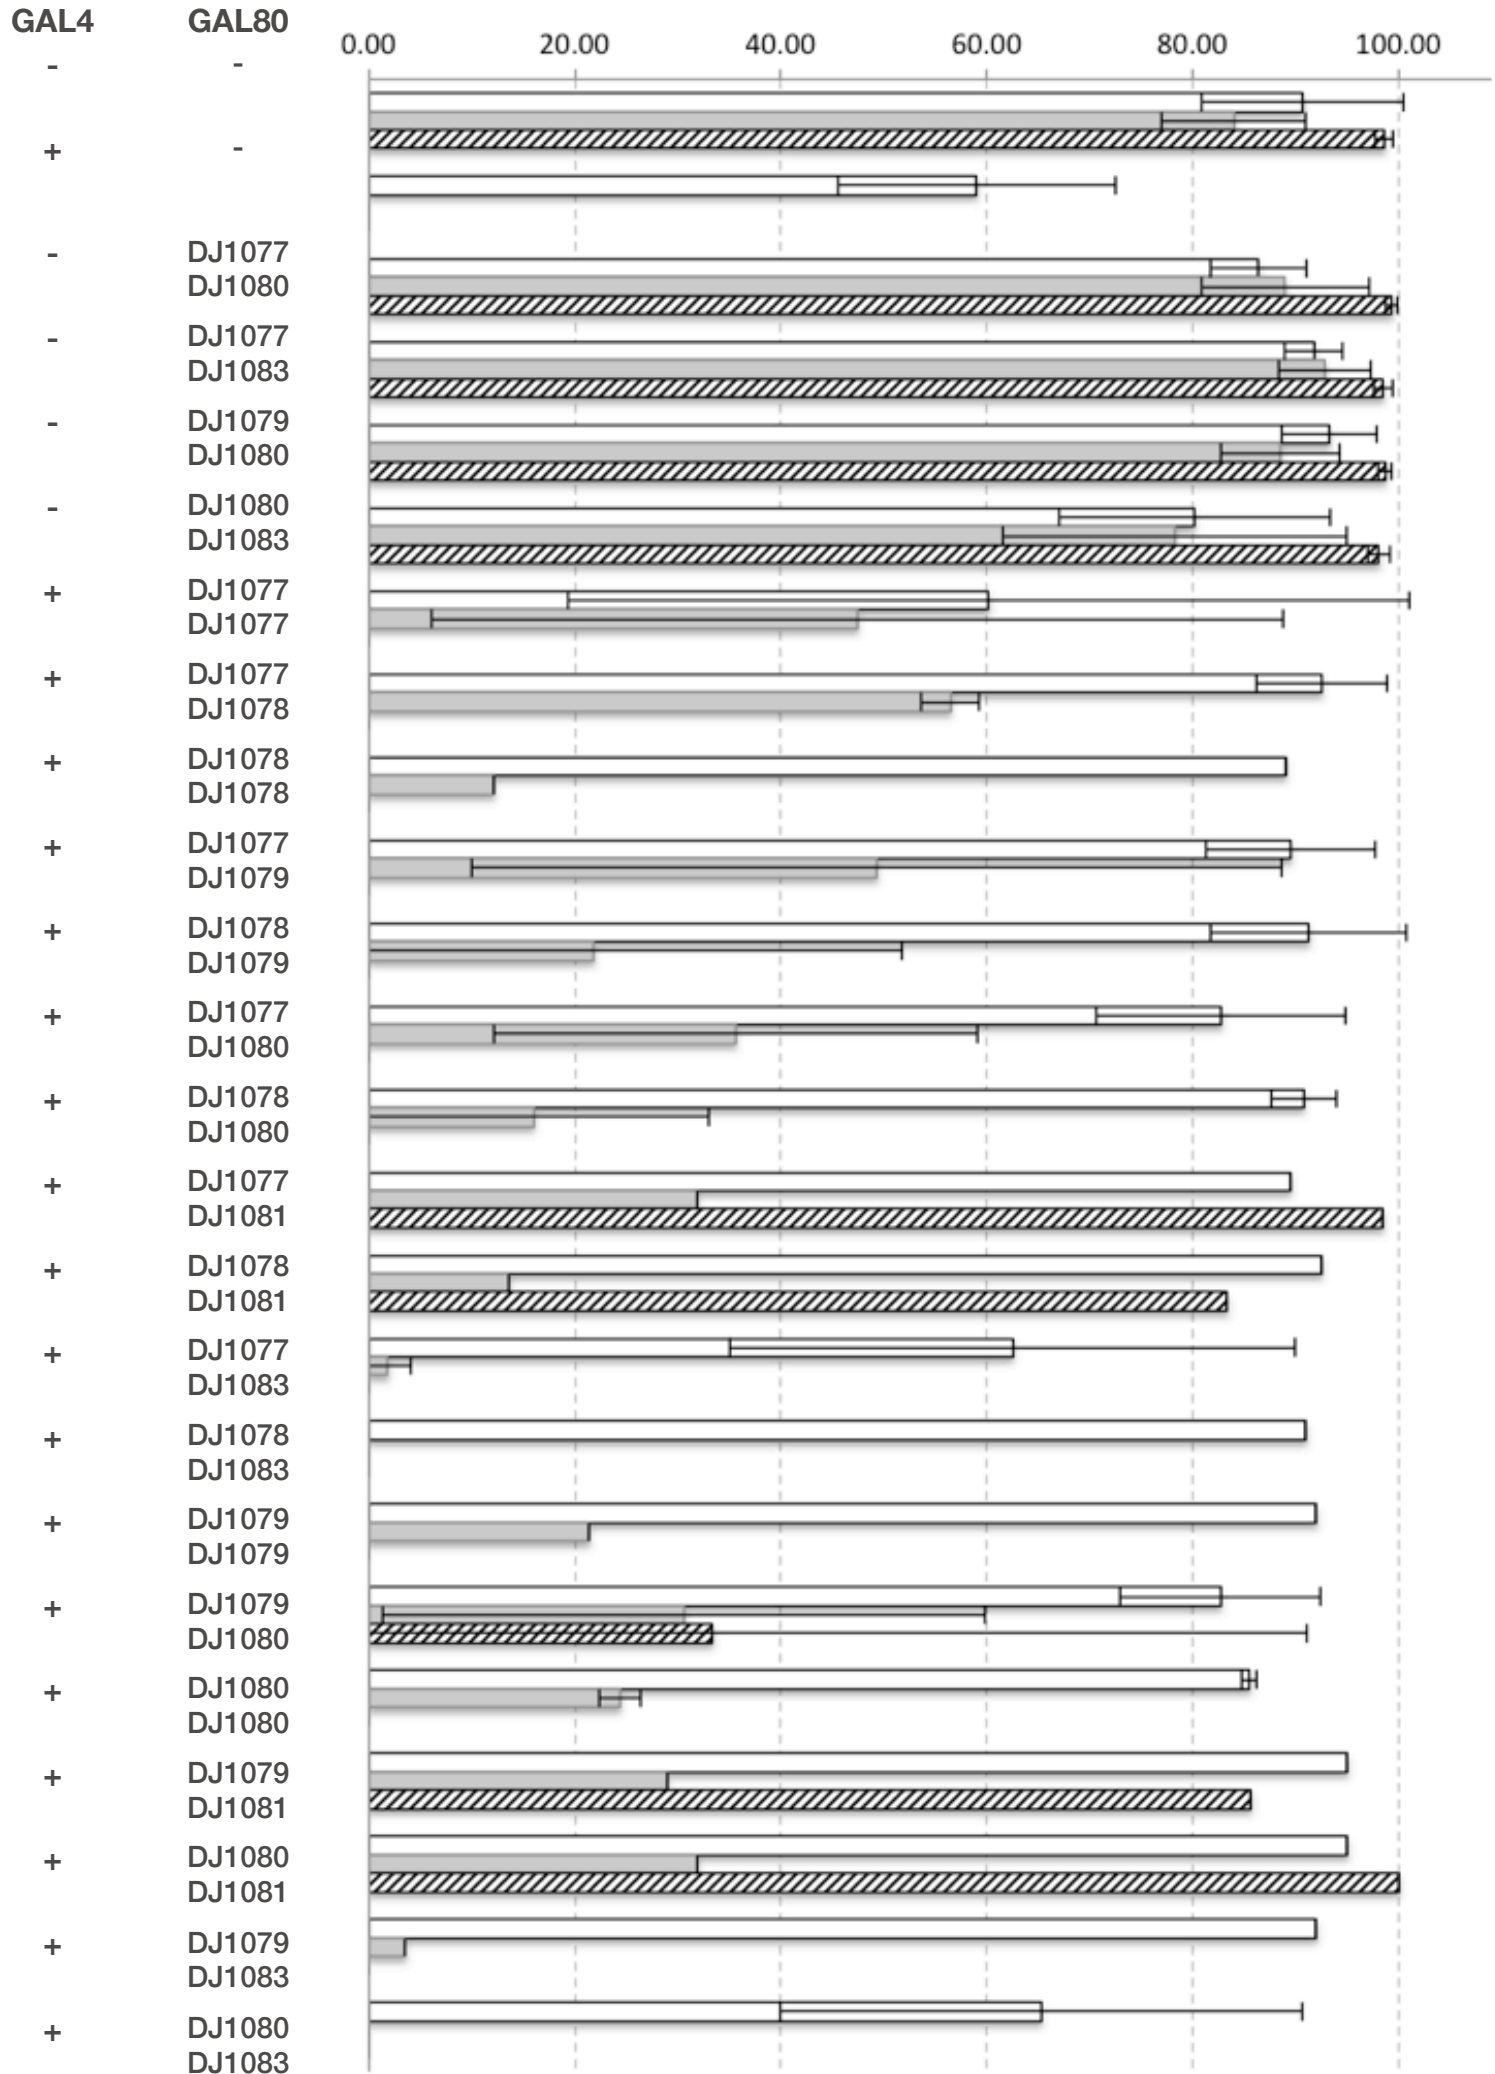

**Supplemental Figure 18** Grim lethality assay of 2 copies of DJ146 insertions treated with ampicillin (30µg/ml) and tetracycline (50µg/ml). Horizontal axes shows average percent survival (% survival calculated as a % of the previous developmental stage). White bars indicate % of L1 larvae, grey bars indicate % of pupae, and striped bars indicate % of adults. Error bars represent  $\pm 2SD$ . Vertical axes indicates genotype, all genotypes contain a UAS-grim transgene but differ by the presence or absence of GAL4 and GAL80 insertion. GAL4 column displays presence (+) or absence (-) of GAL4 in the genotype, and the GAL80 column indicates the DJ146 insertions or an absence (-) of GAL80.

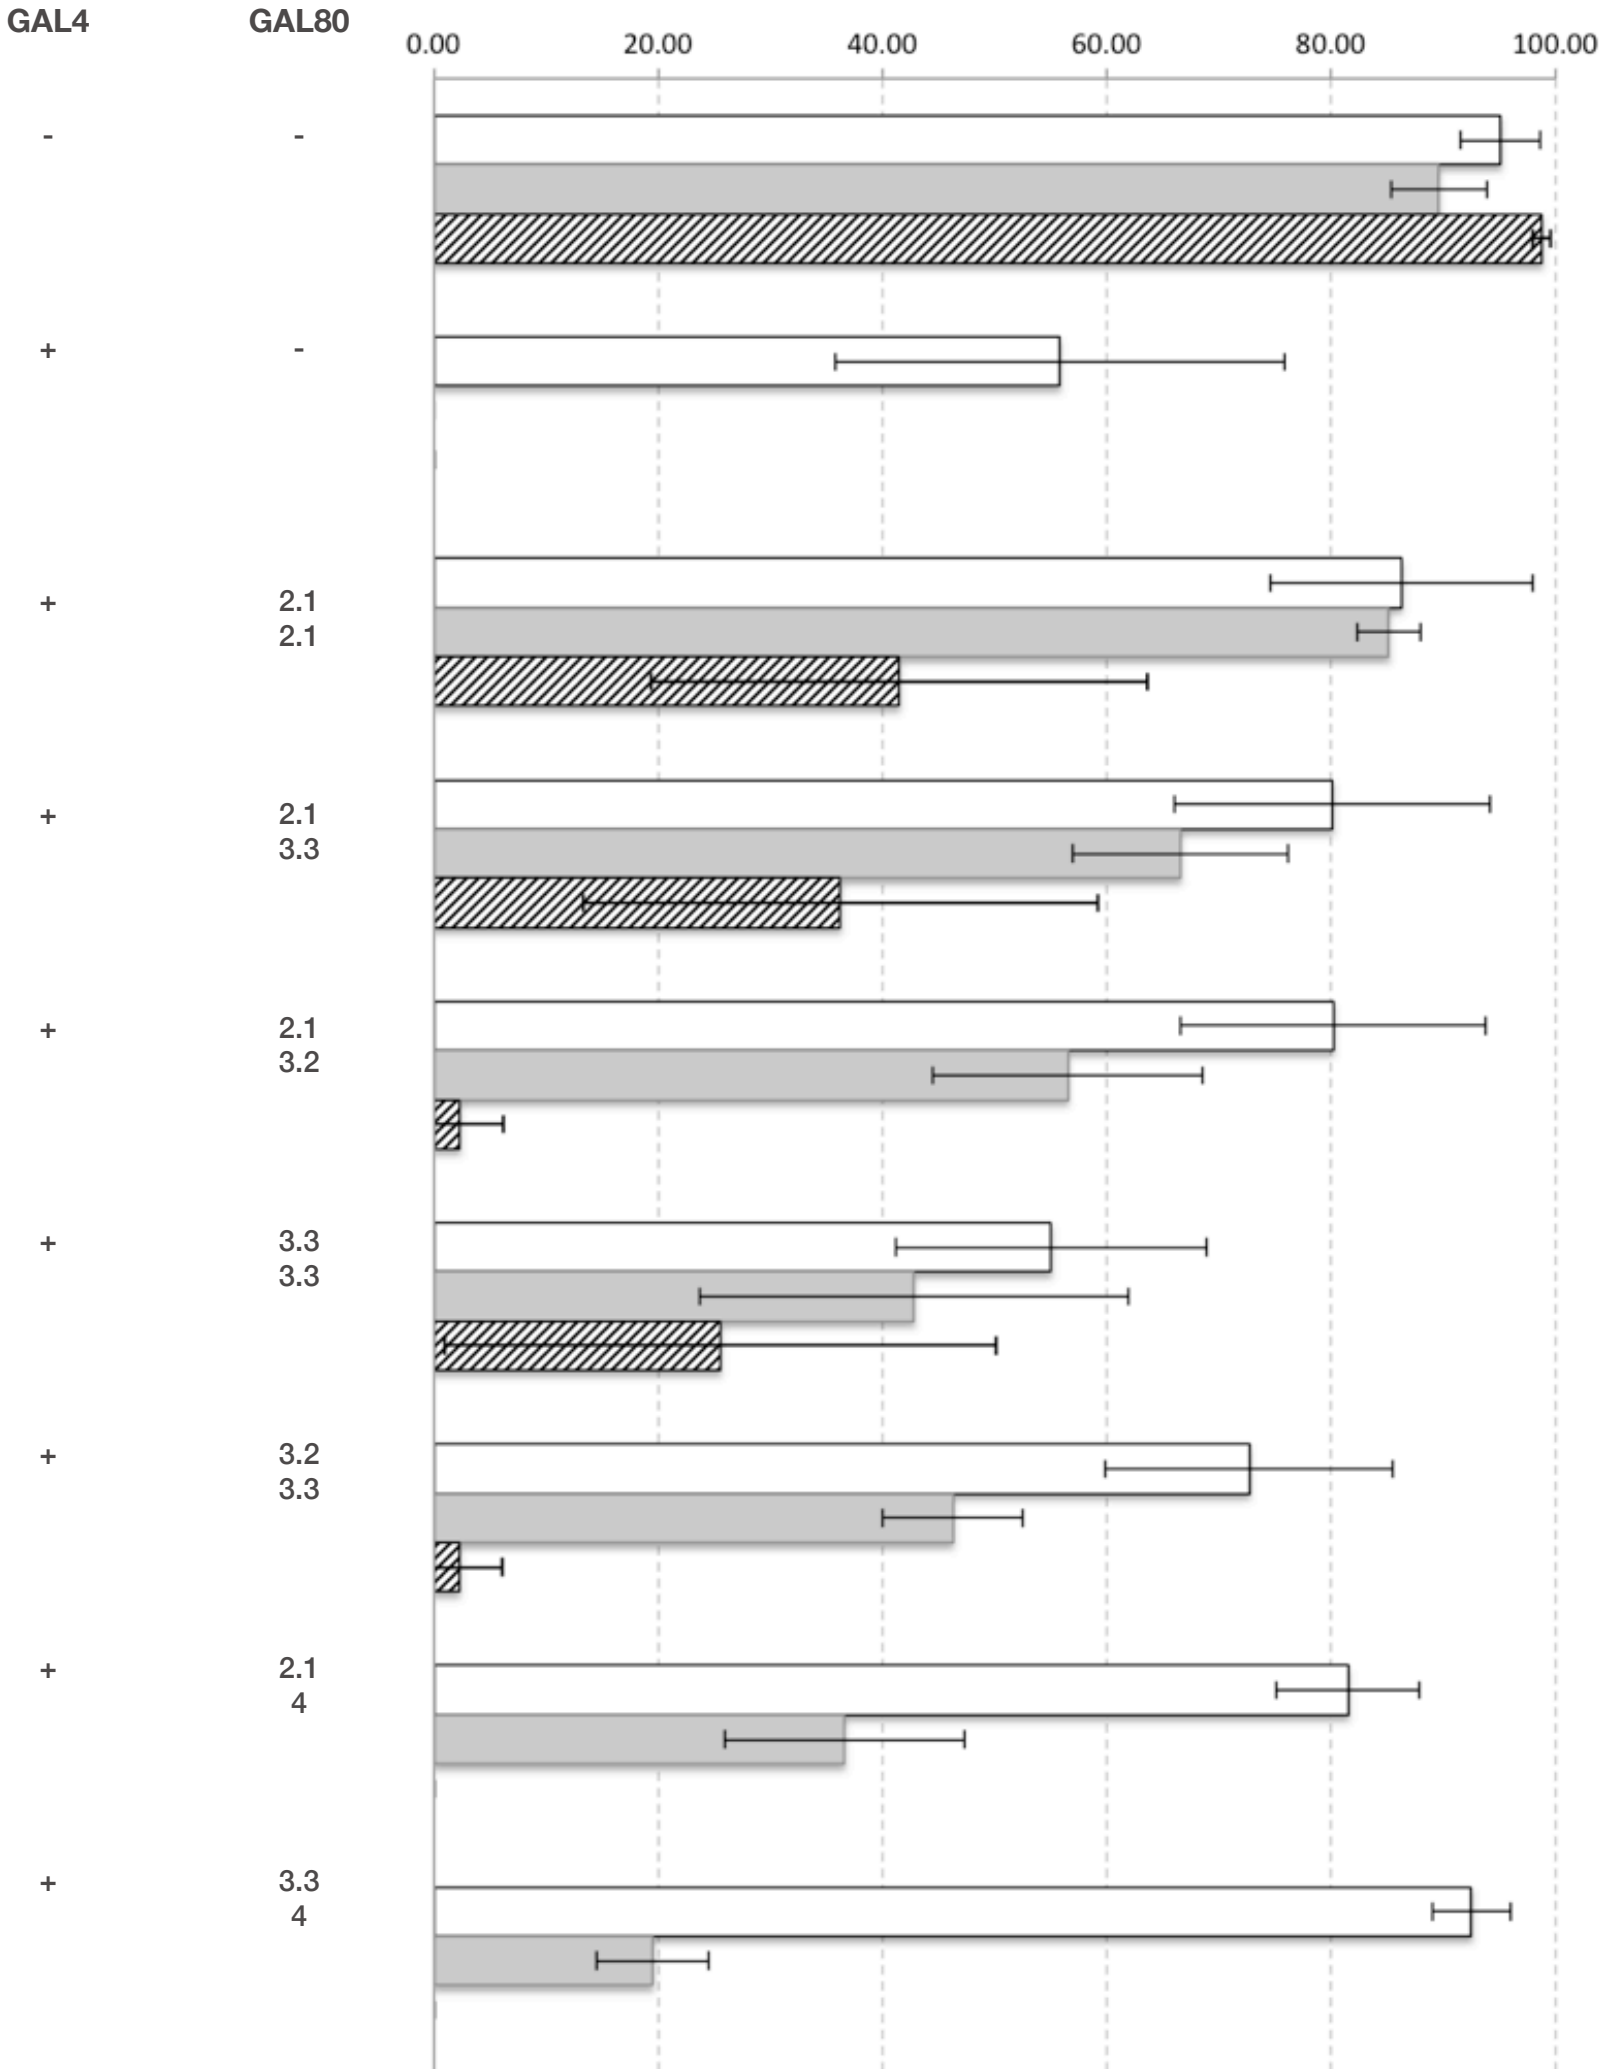

**Supplemental Figure 19** Grim lethality assay of 2 copies of DJ147 insertions treated with ampicillin (30µg/ml). Horizontal axes shows average percent survival (% survival calculated as a % of the previous developmental stage). White bars indicate % of L1 larvae, grey bars indicate % of pupae, and striped bars indicate % of adults. Error bars represent  $\pm 2SD$ . Vertical axes indicates genotype, all genotypes contain a UAS-grim transgene but differ by the presence or absence of GAL4 and GAL80 insertion. GAL4 column displays presence (+) or absence (-) of GAL4 in the genotype, and the GAL80 column indicates the DJ147 insertions or an absence (-) of GAL80.

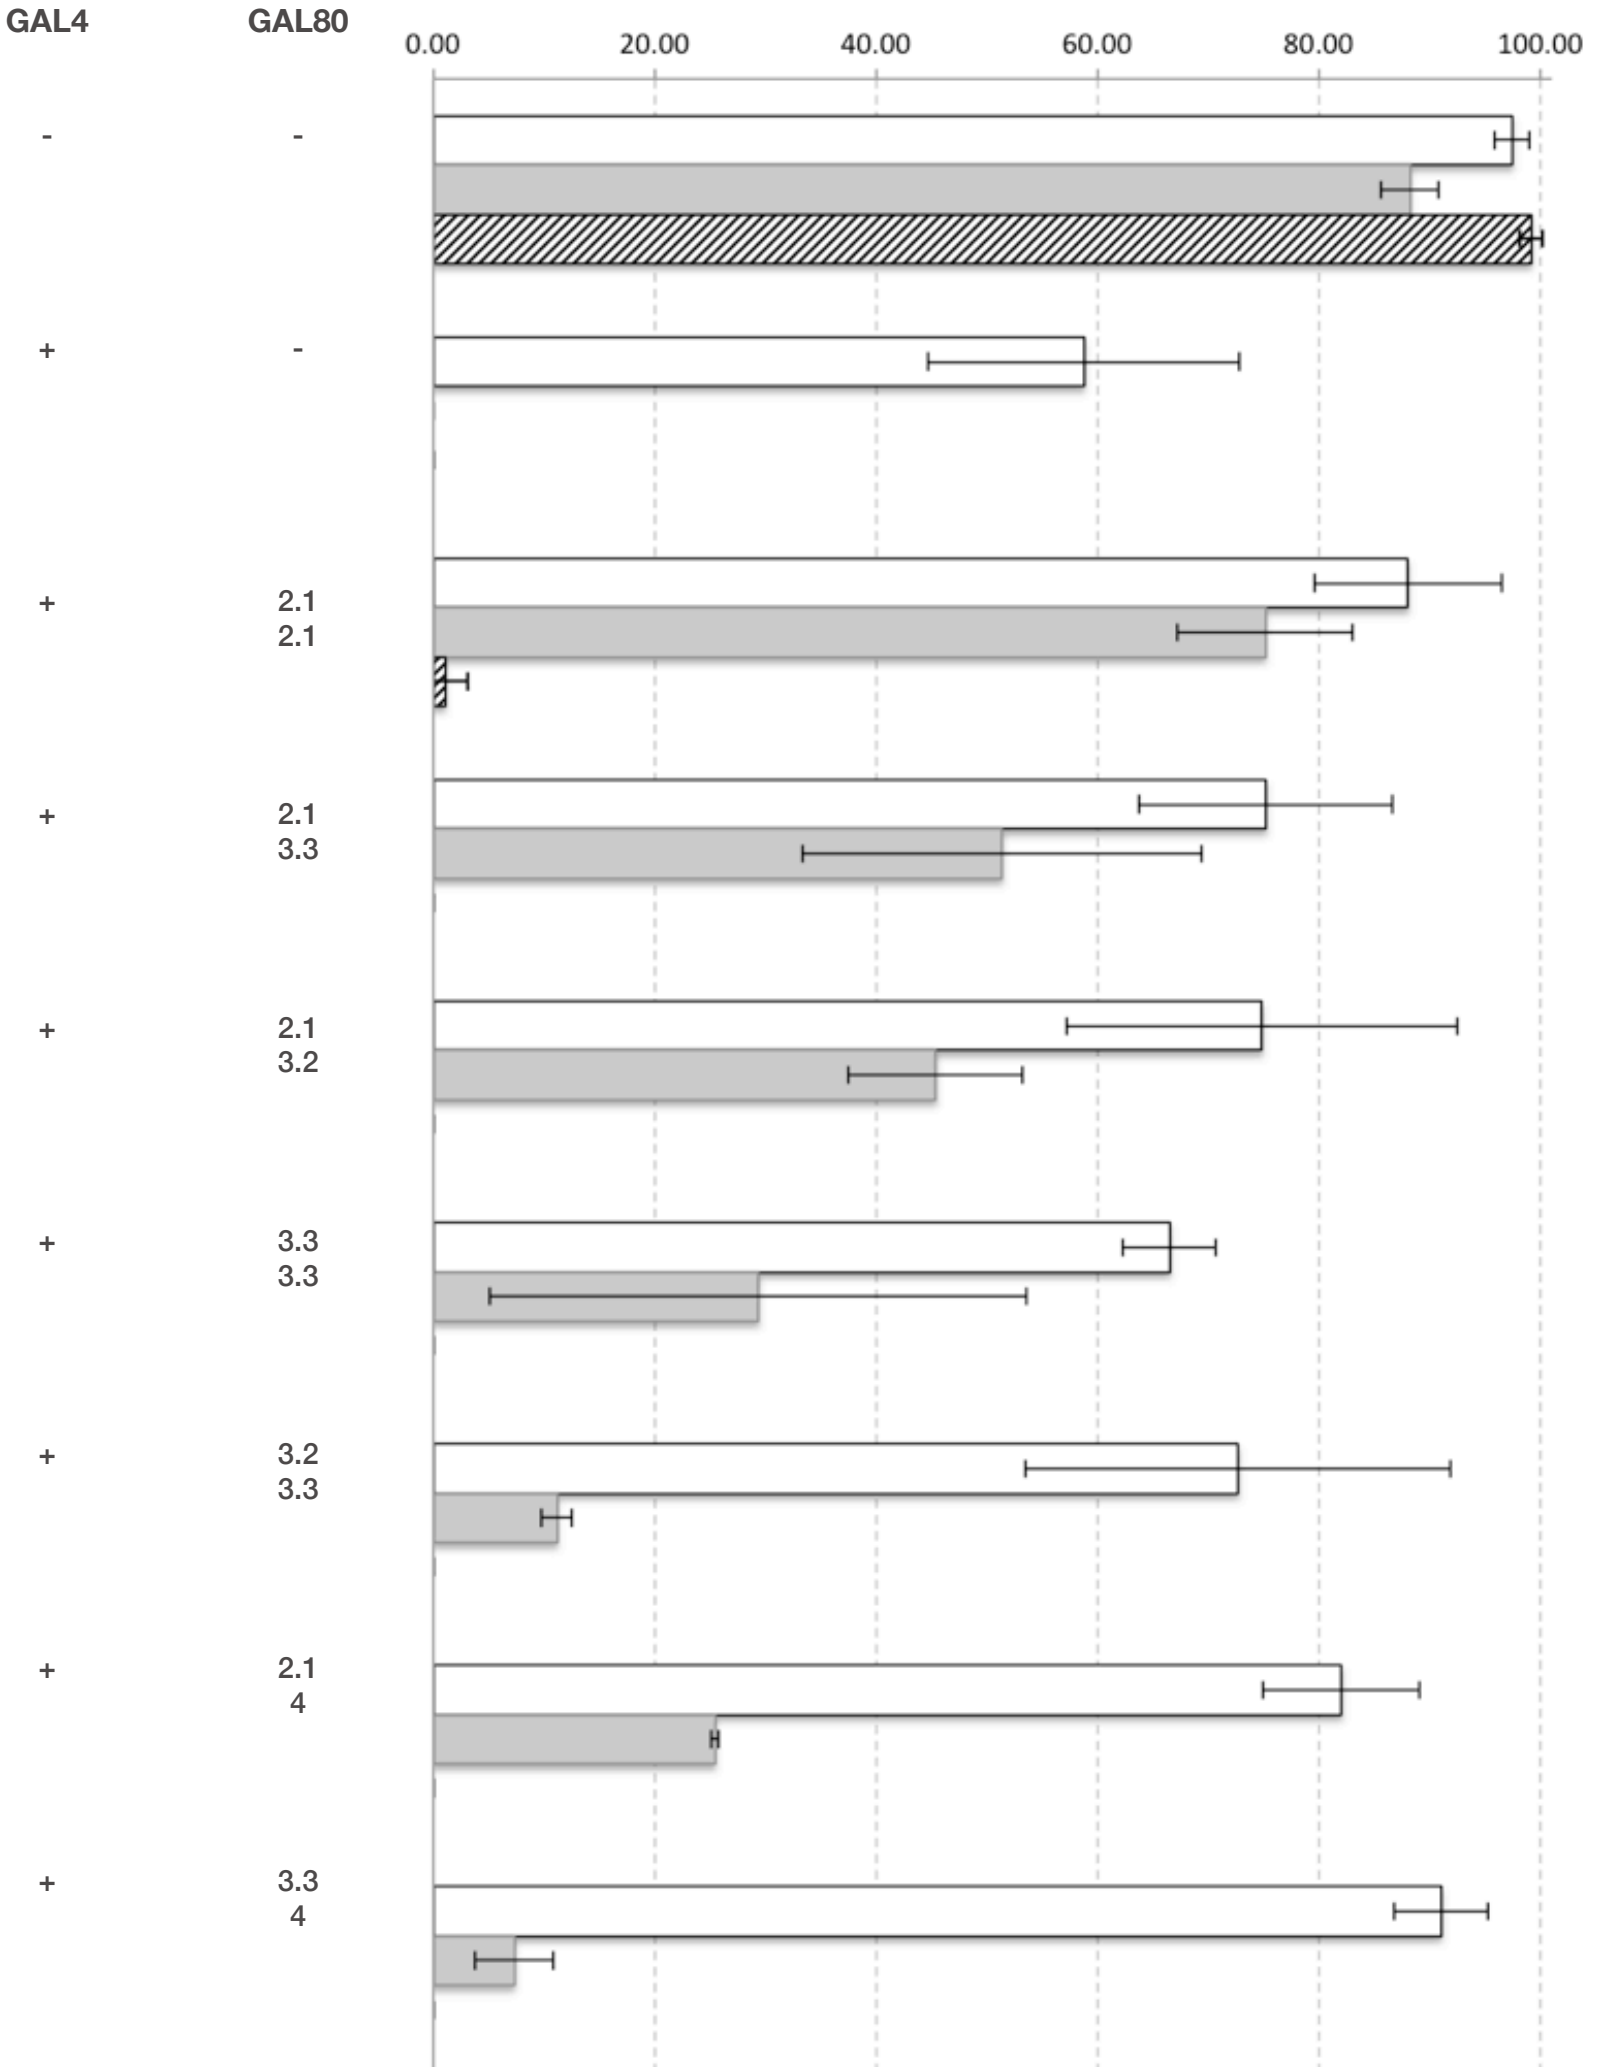

**Supplemental Figure 20** Grim lethality assay of 2 copies of DJ147 insertions treated with ampicillin (30µg/ml) and tetracycline (50µg/ml). Horizontal axes shows average percent survival (% survival calculated as a % of the previous developmental stage). White bars indicate % of L1 larvae, grey bars indicate % of pupae, and striped bars indicate % of adults. Error bars represent  $\pm 2SD$ . Vertical axes indicates genotype, all genotypes contain a UAS-grim transgene but differ by the presence or absence of GAL4 and GAL80 insertion. GAL4 column displays presence (+) or absence (-) of GAL4 in the genotype, and the GAL80 column indicates the DJ147 insertions or an absence (-) of GAL80.

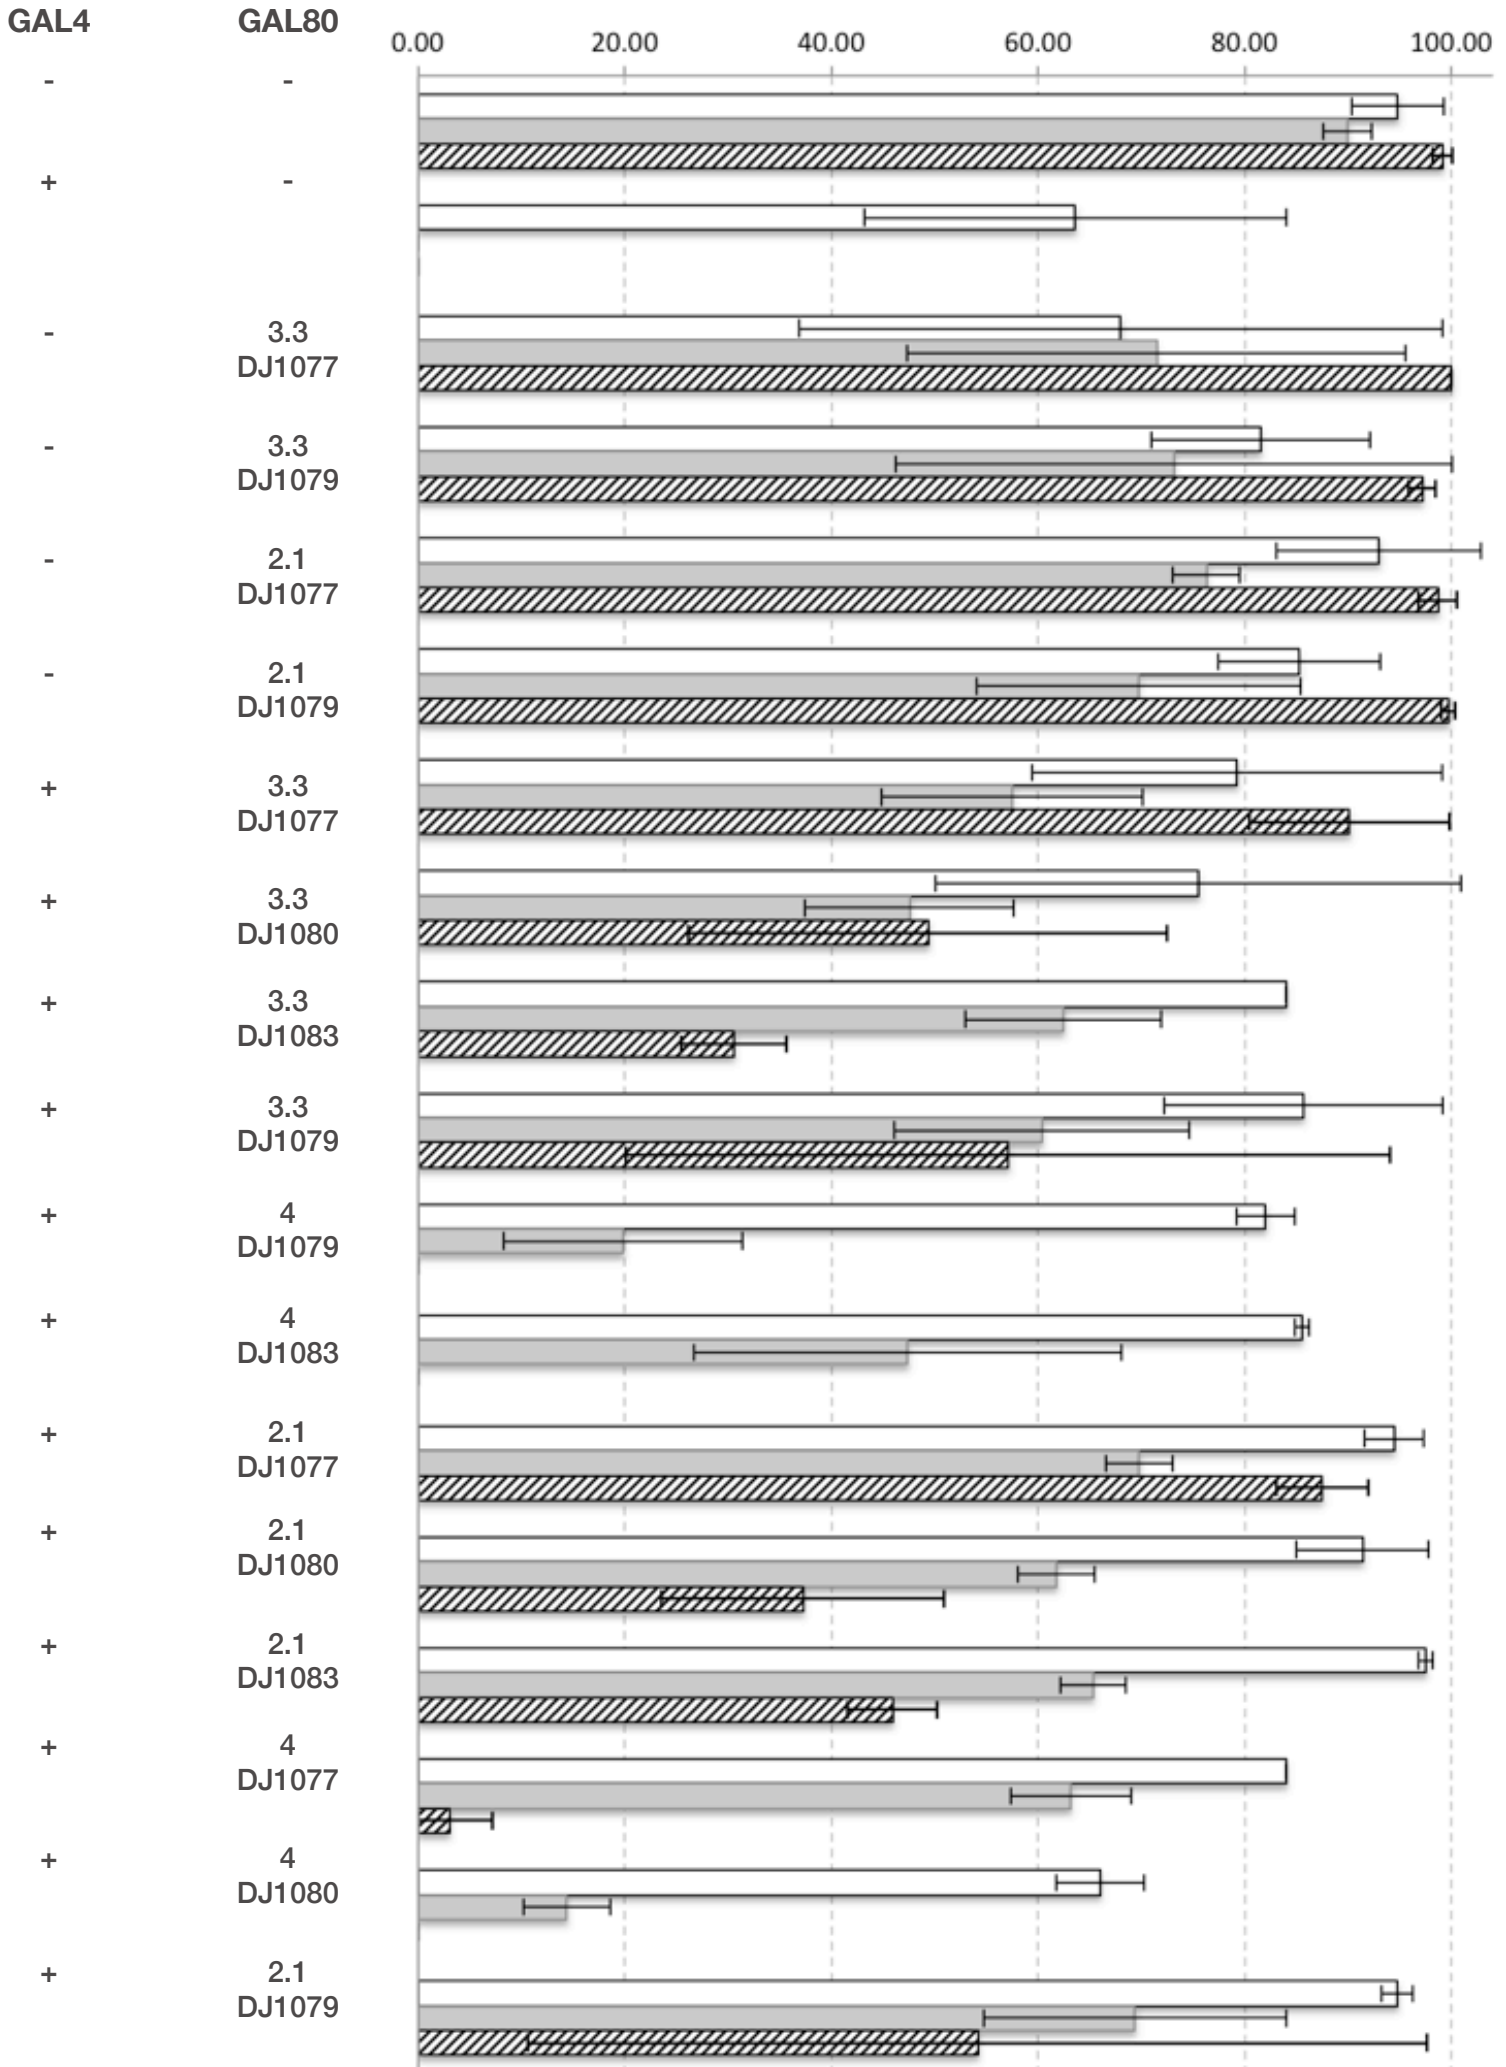

**Supplemental Figure 21** Grim lethality assay of 1 copy of DJ147 insertion and 1 copy of DJ146 insertion treated with ampicillin (30µg/ml). Horizontal axes shows average percent survival (% survival calculated as a % of the previous developmental stage). White bars indicate % of L1 larvae, grey bars indicate % of pupae, and striped bars indicate % of adults. Error bars represent  $\pm 2SD$ . Vertical axes indicates genotype, all genotypes contain a UAS-grim transgene but differ by the presence or absence of GAL4 and GAL80 insertion. GAL4 column displays presence (+) or absence (-) of GAL4 in the genotype, and the GAL80 column indicates the DJ147 and DJ146 insertions or an absence (-) of GAL80.

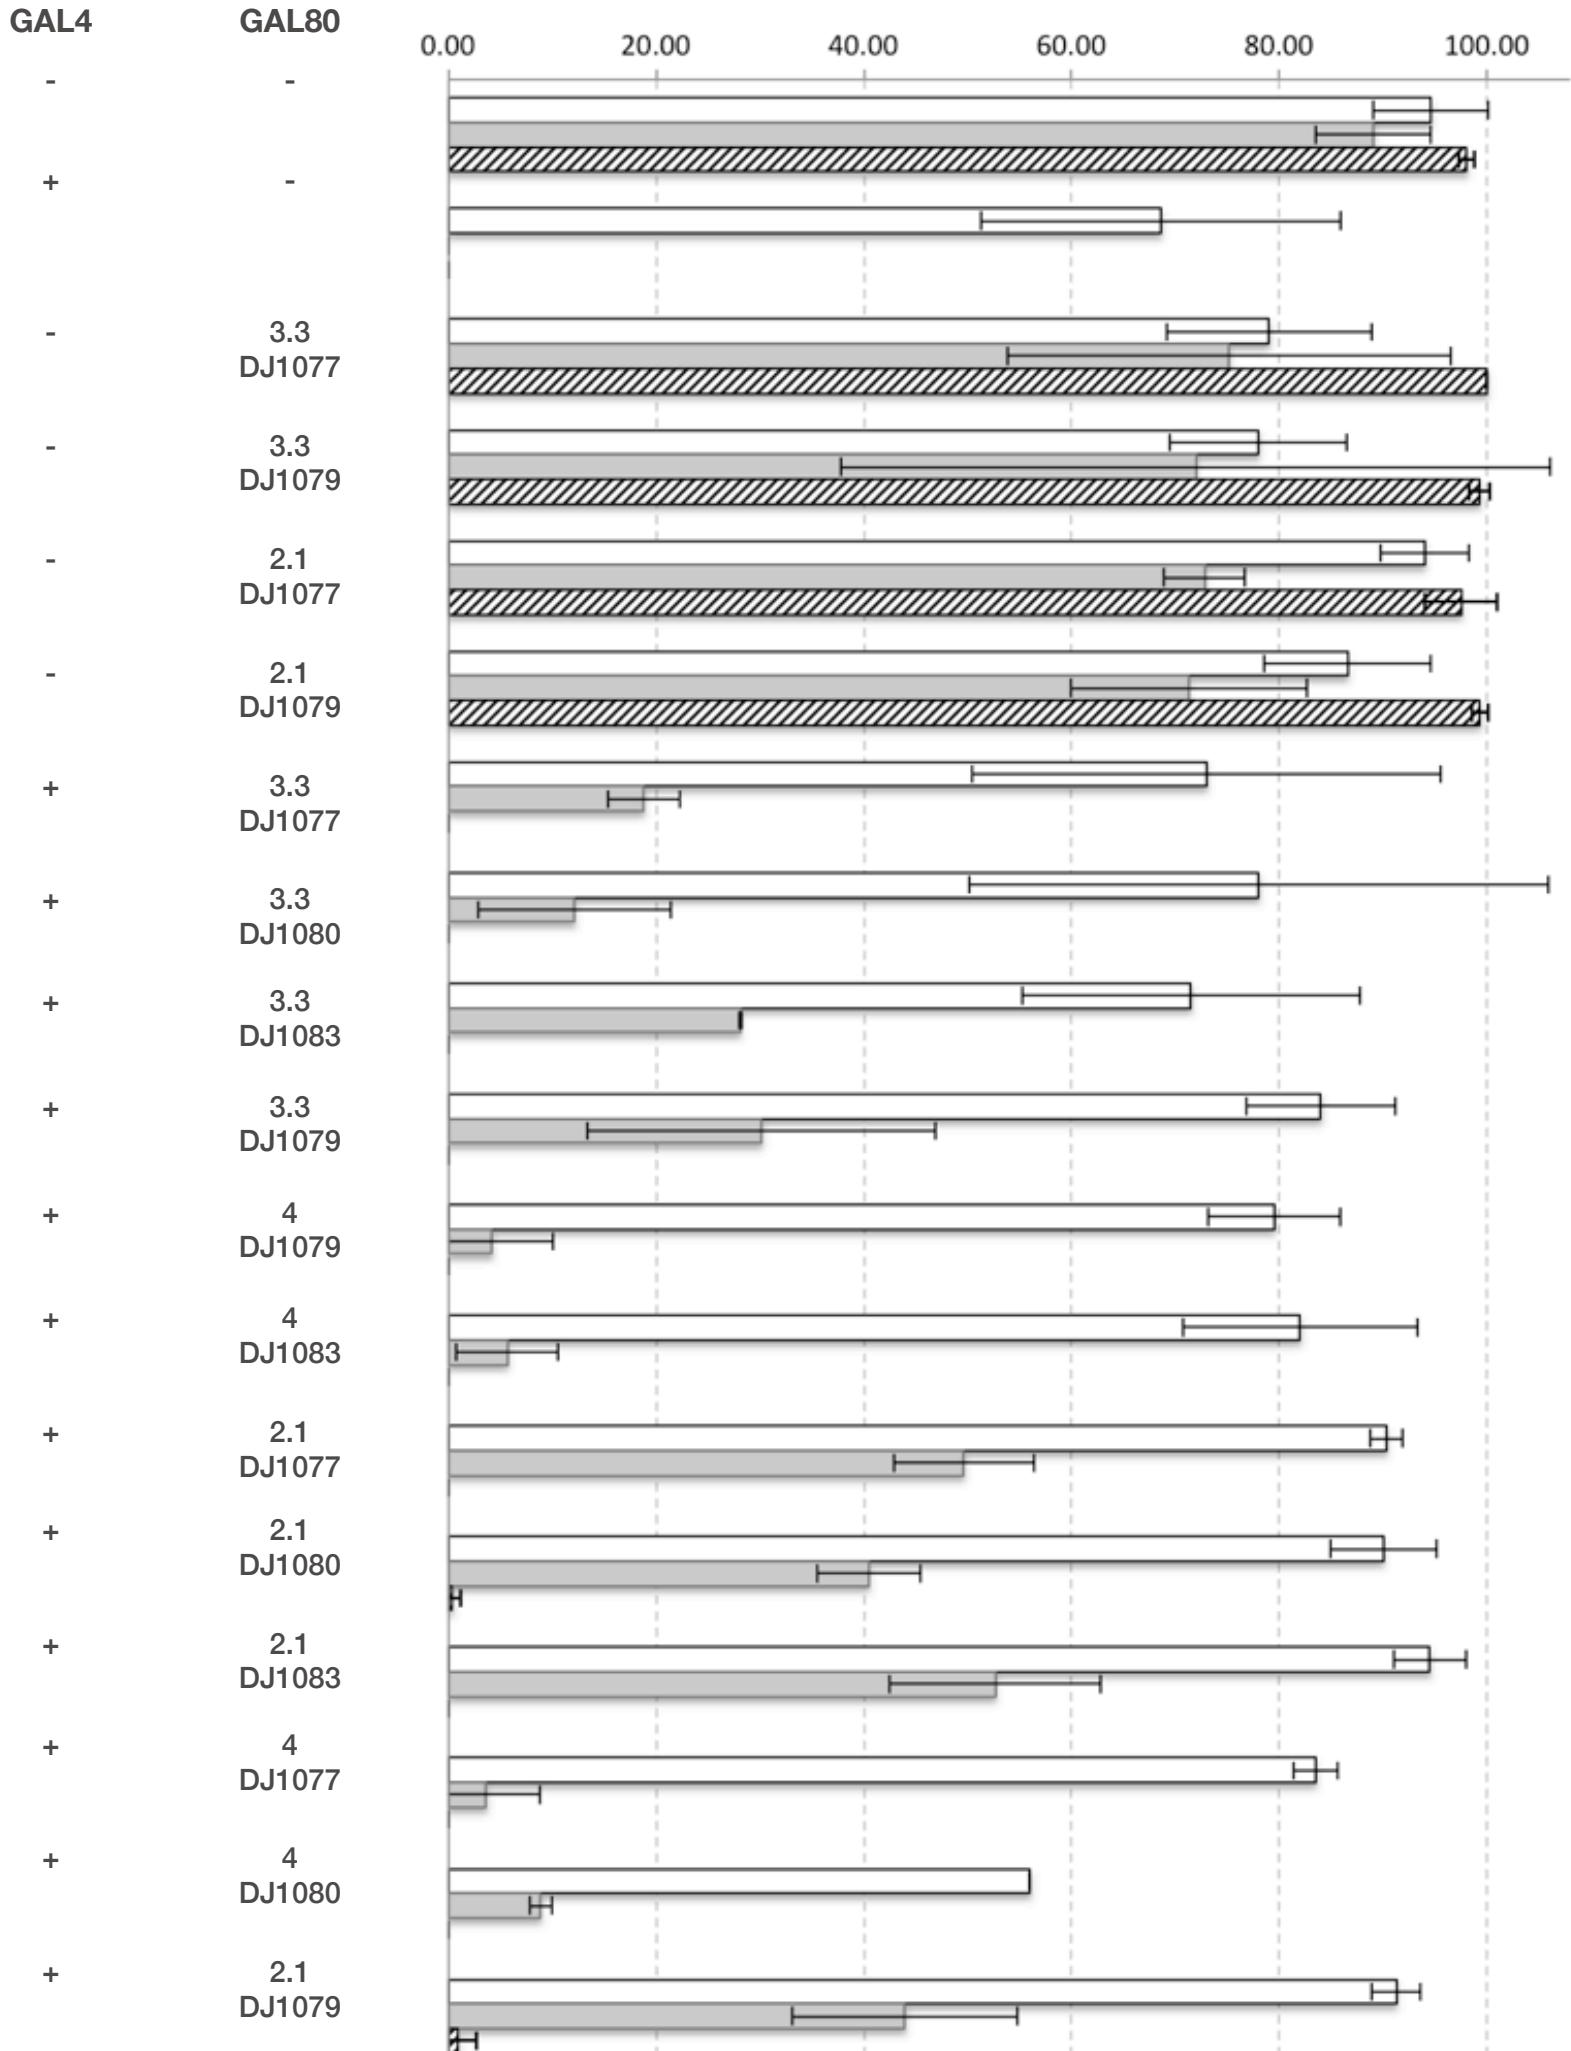

**Supplemental Figure 22** Grim lethality assay of 1 copy of DJ147 insertion and 1 copy of DJ146 insertion treated with ampicillin (30µg/ml) and tetracycline (50µg/ml). Horizontal axes shows average percent survival (% survival calculated as a % of the previous developmental stage). White bars indicate % of L1 larvae, grey bars indicate % of pupae, and striped bars indicate % of adults. Error bars represent ±2SD. Vertical axes indicates genotype, all genotypes contain a UAS-grim transgene but differ by the presence or absence of GAL4 and GAL80 insertion. GAL4 column displays presence (+) or absence (-) of GAL4 in the genotype, and the GAL80 column indicates the DJ147 and DJ146 insertions or an absence (-) of GAL80.



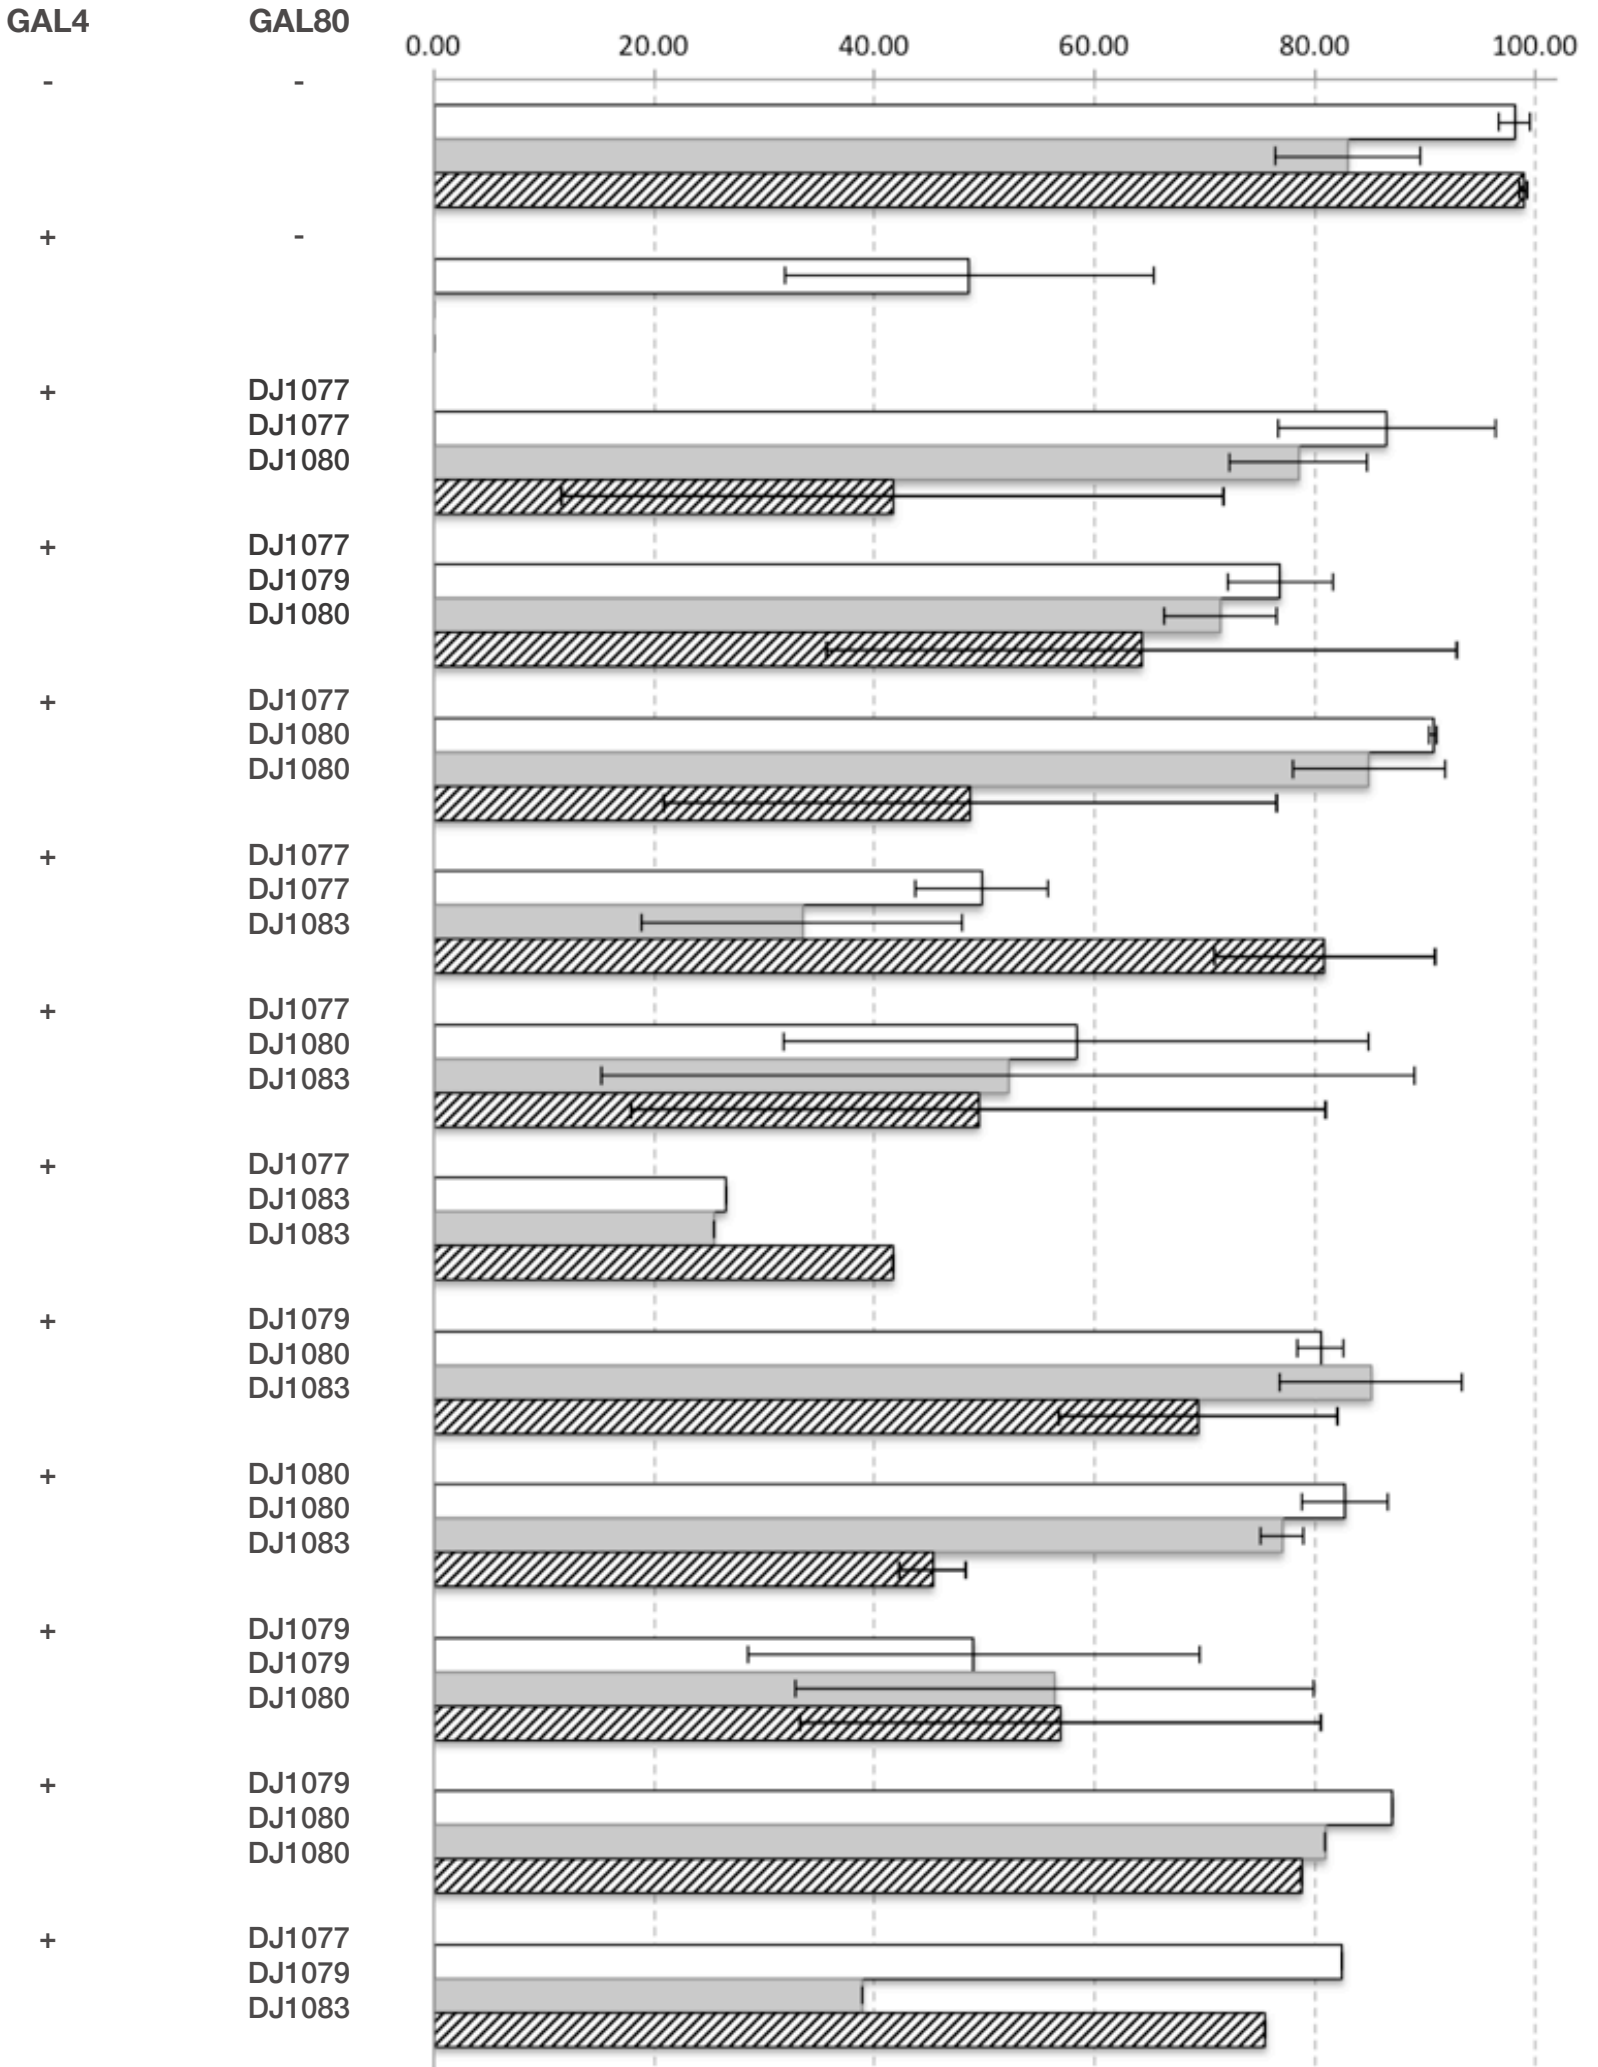

**Supplemental Figure 23** Grim lethality assay of 3 copies of DJ146 insertions treated with ampicillin (30µg/ml). Horizontal axes shows average percent survival (% survival calculated as a % of the previous developmental stage). White bars indicate % of L1 larvae, grey bars indicate % of pupae, and striped bars indicate % of adults. Error bars represent  $\pm 2SD$ . Vertical axes indicates genotype, all genotypes contain a UAS-grim transgene but differ by the presence or absence of GAL4 and GAL80 insertion. GAL4 column displays presence (+) or absence (-) of GAL4 in the genotype, and the GAL80 column indicates the DJ146 insertions or an absence (-) of GAL80.

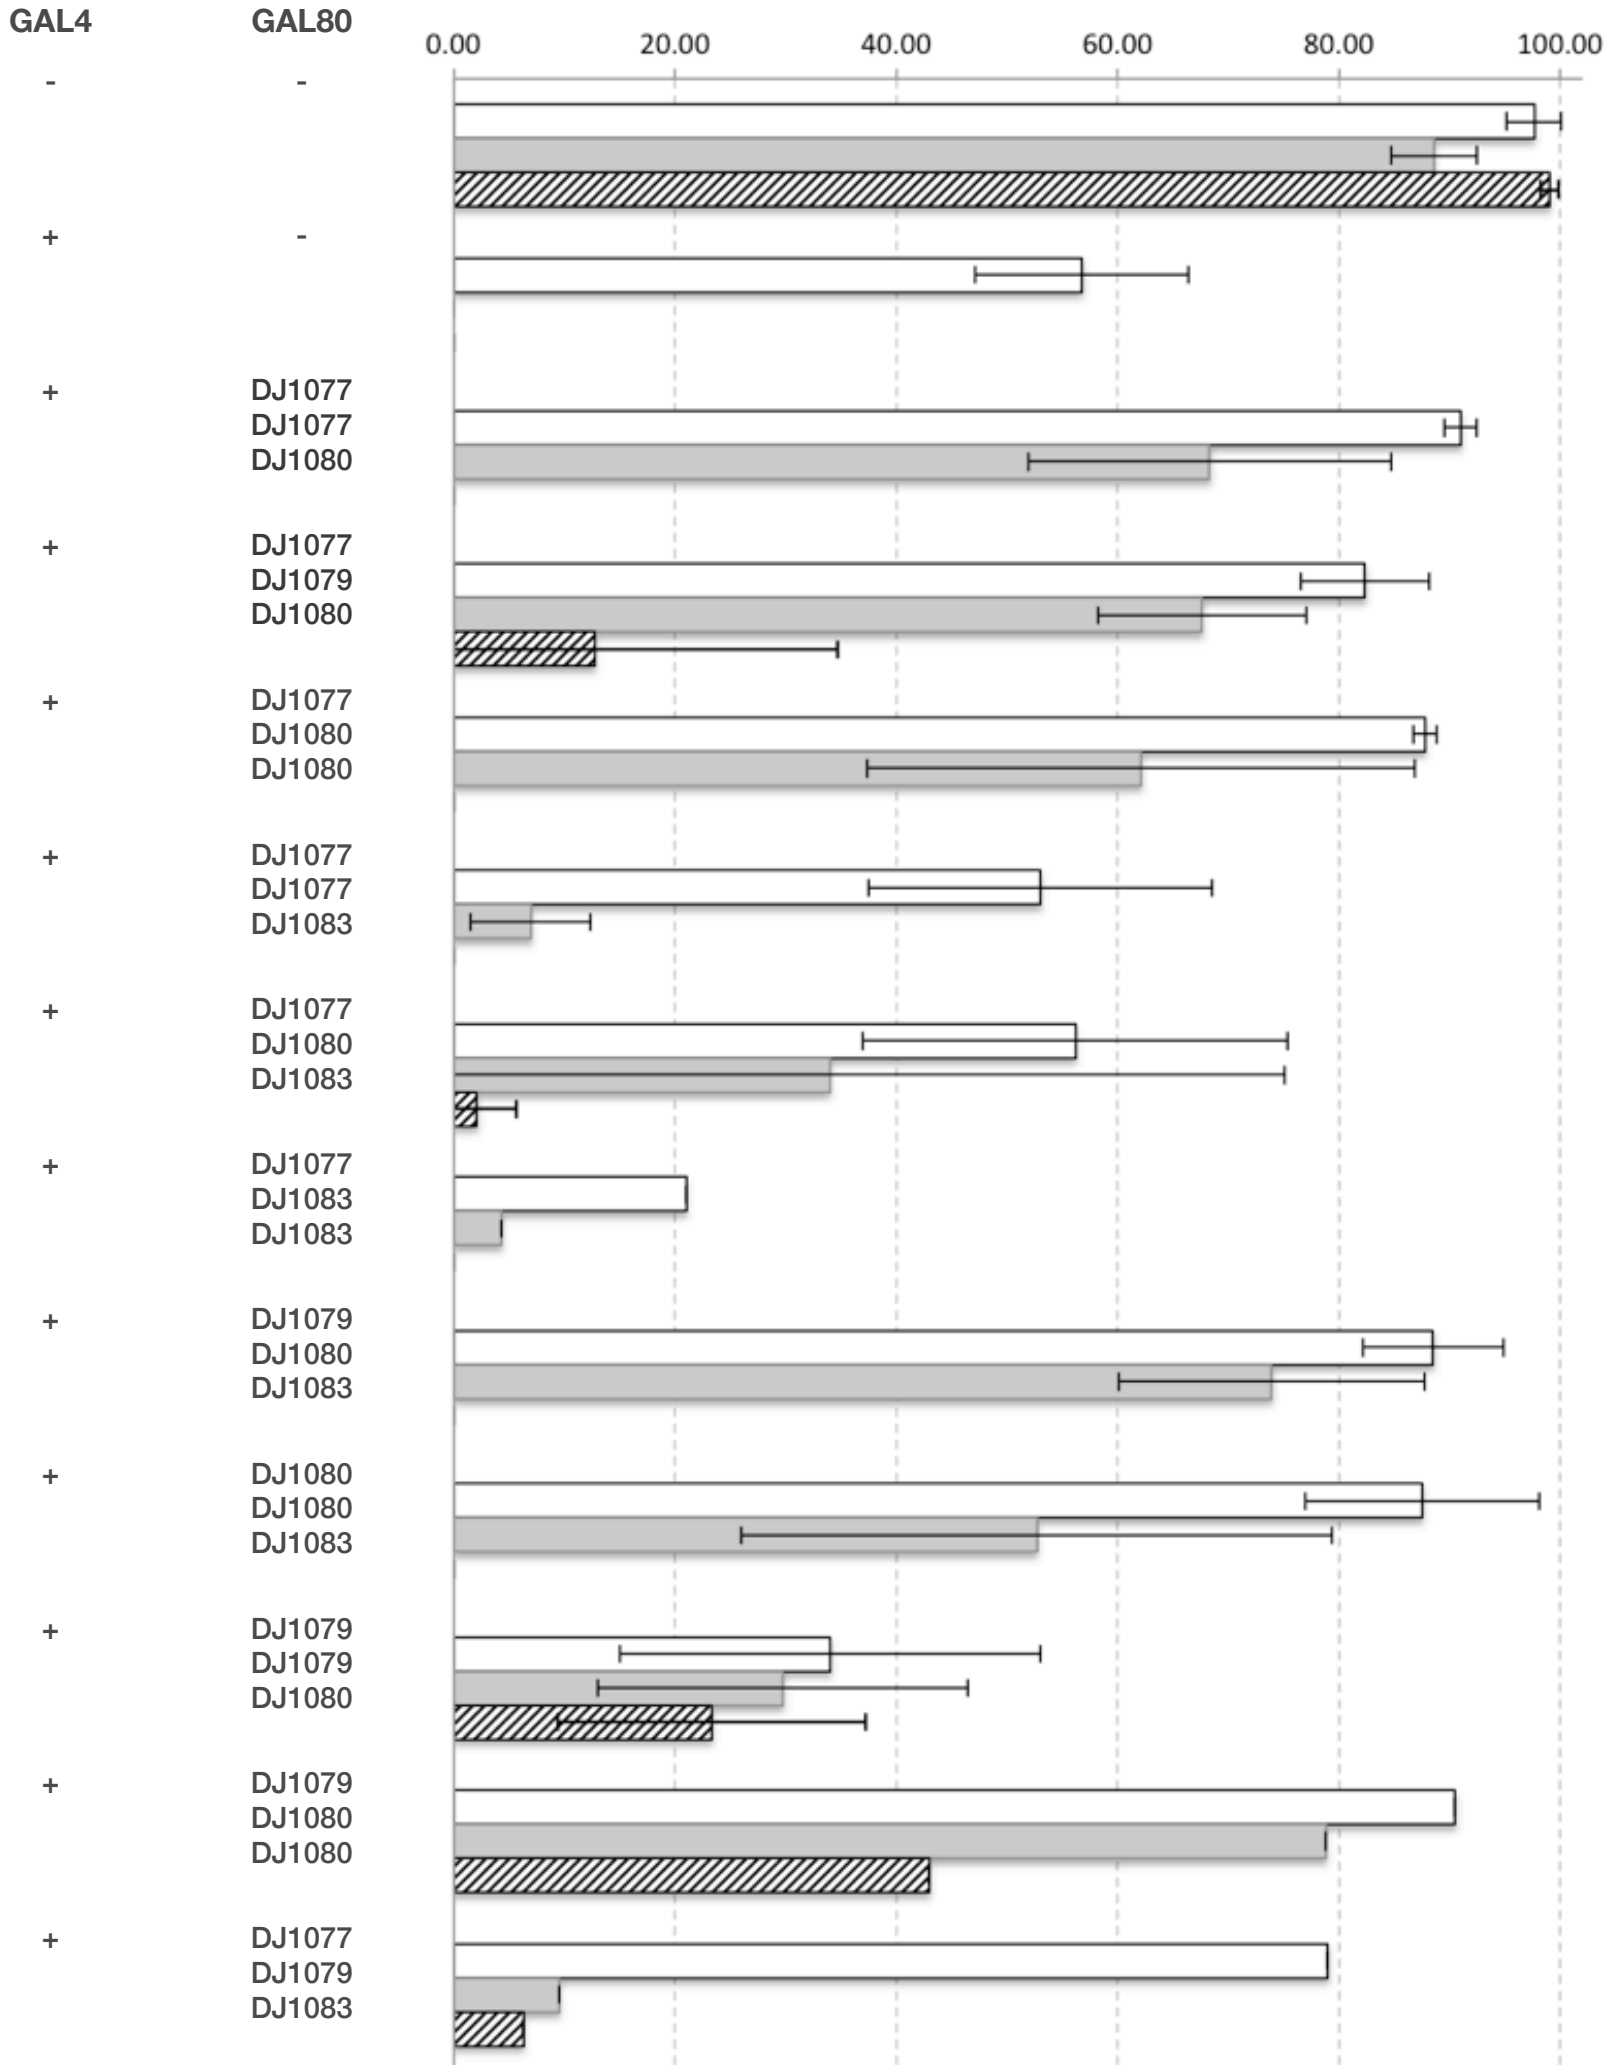

**Supplemental Figure 24** Grim lethality assay of 3 copies of DJ146 insertions treated with ampicillin (30µg/ml) and tetracycline (50µg/ml). Horizontal axes shows average percent survival (% survival calculated as a % of the previous developmental stage). White bars indicate % of L1 larvae, grey bars indicate % of pupae, and striped bars indicate % of adults. Error bars represent  $\pm 2SD$ . Vertical axes indicates genotype, all genotypes contain a UAS-grim transgene but differ by the presence or absence of GAL4 and GAL80 insertion. GAL4 column displays presence (+) or absence (-) of GAL4 in the genotype, and the GAL80 column indicates the DJ146 insertions or an absence (-) of GAL80.



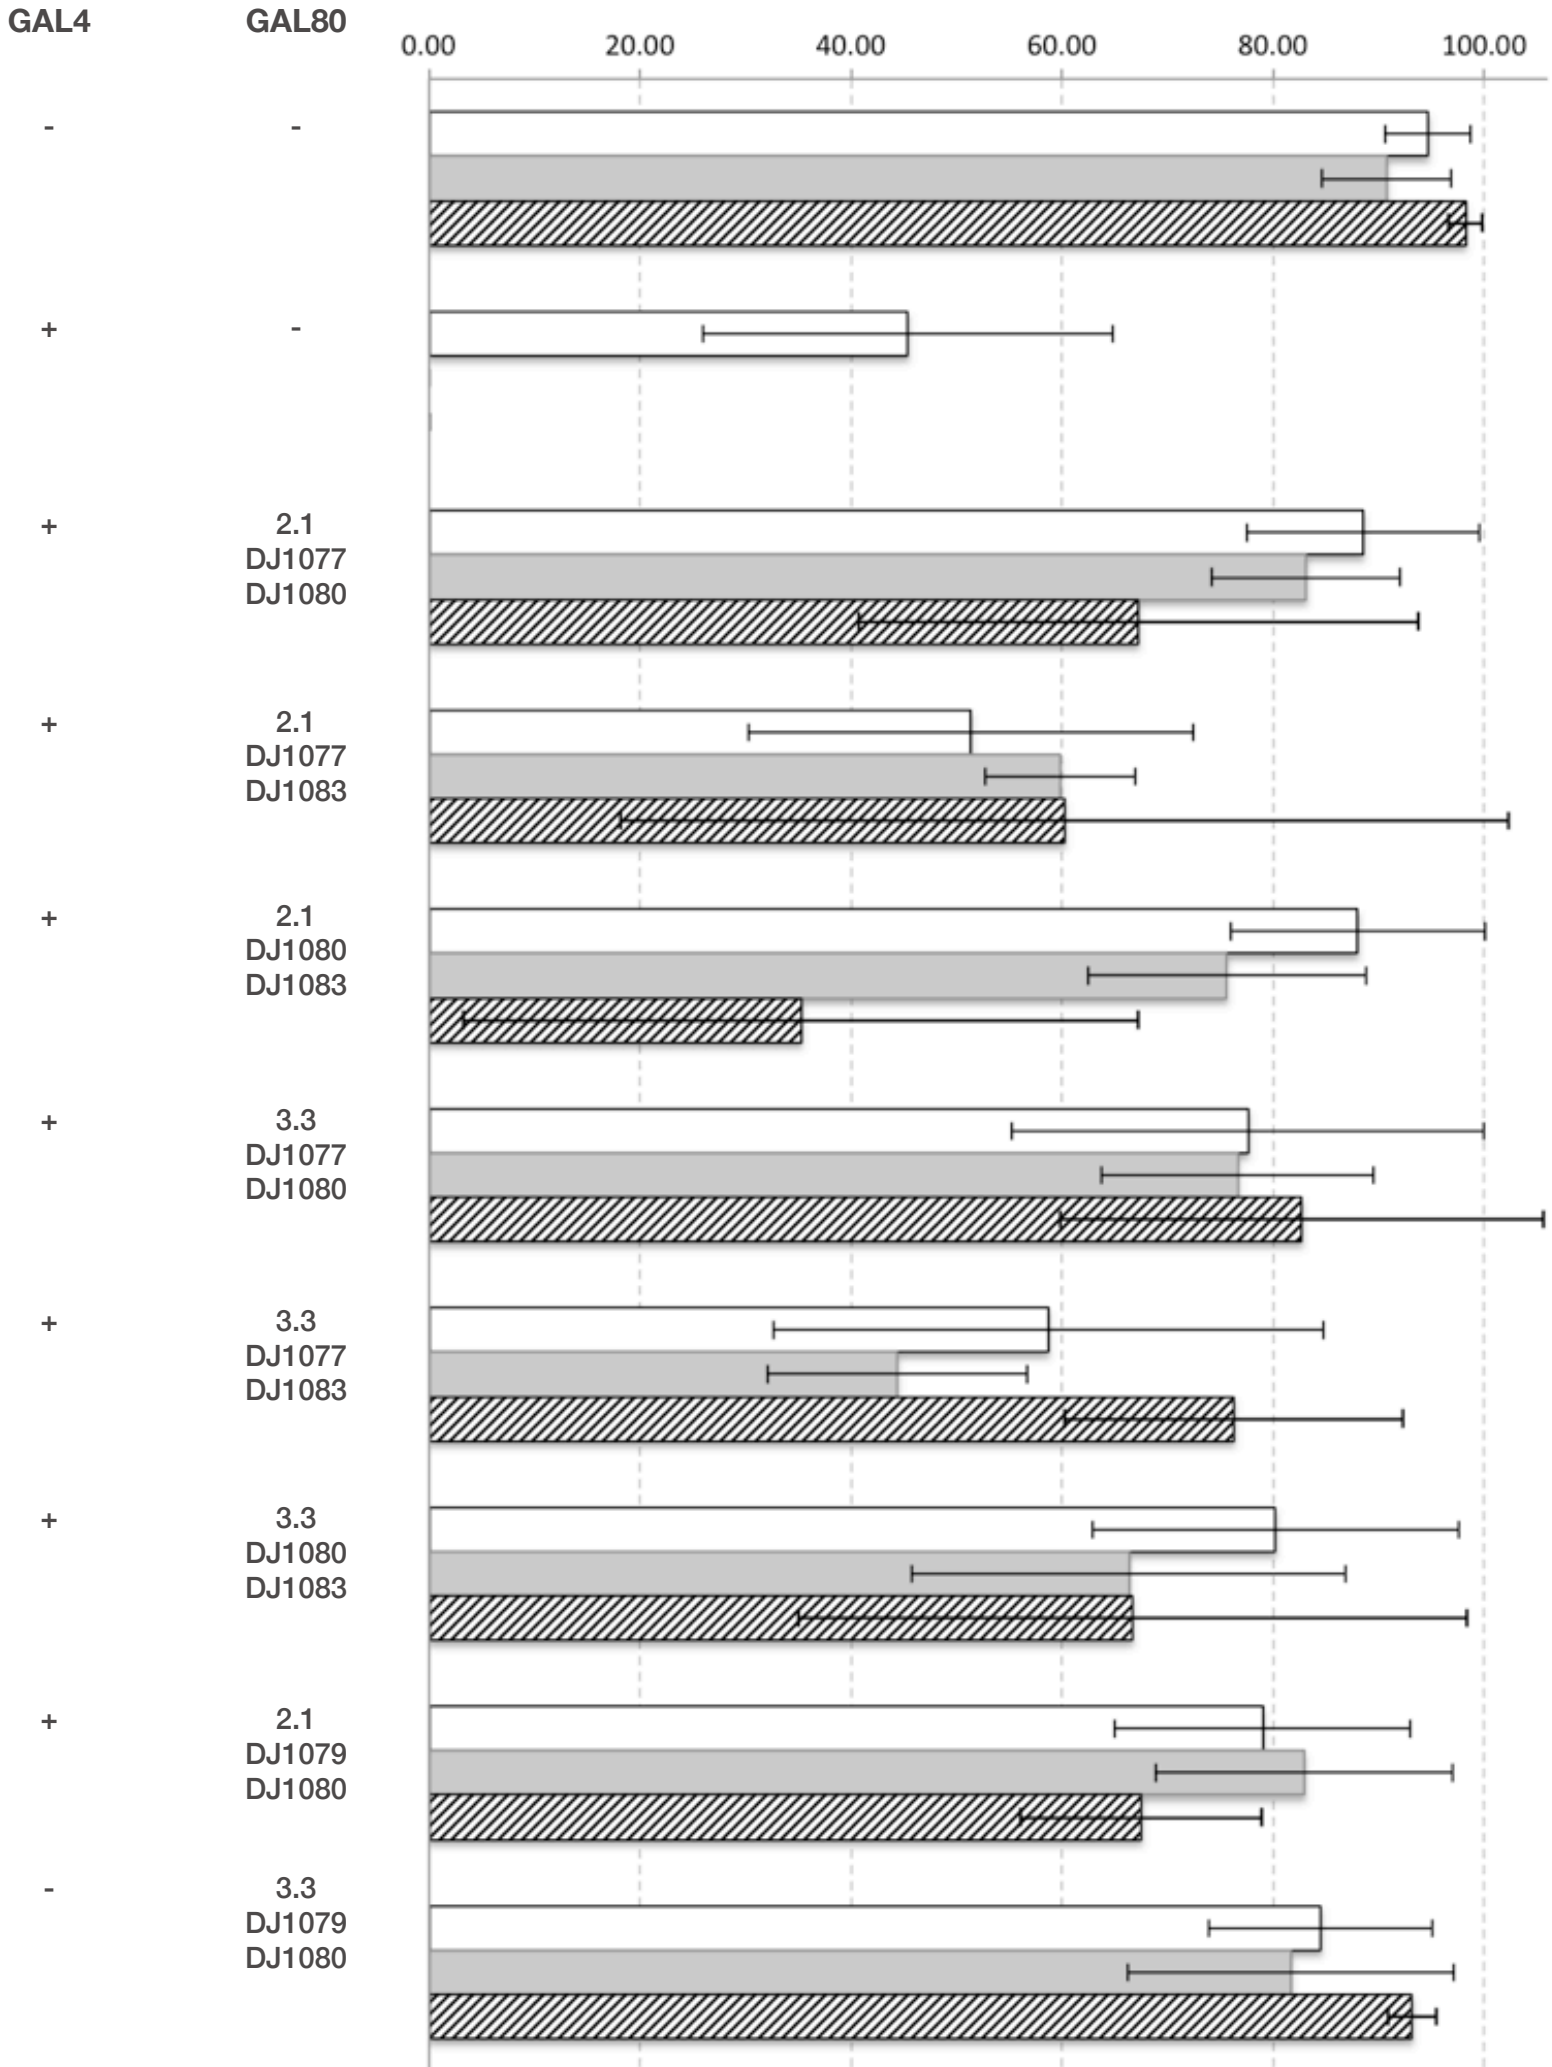

**Supplemental Figure 25** Grim lethality assay of 1 copy of DJ147 insertions and 2 copies of DJ146 insertions treated with ampicillin (30µg/ml). Horizontal axes shows average percent survival (% survival calculated as a % of the previous developmental stage). White bars indicate % of L1 larvae, grey bars indicate % of pupae, and striped bars indicate % of adults. Error bars represent  $\pm 2SD$ . Vertical axes indicates genotype, all genotypes contain a UAS-grim transgene but differ by the presence or absence of GAL4 and GAL80 insertion. GAL4 column displays presence (+) or absence (-) of GAL4 in the genotype, and the GAL80 column indicates the DJ146 and DJ147 insertions or an absence (-) of GAL80.

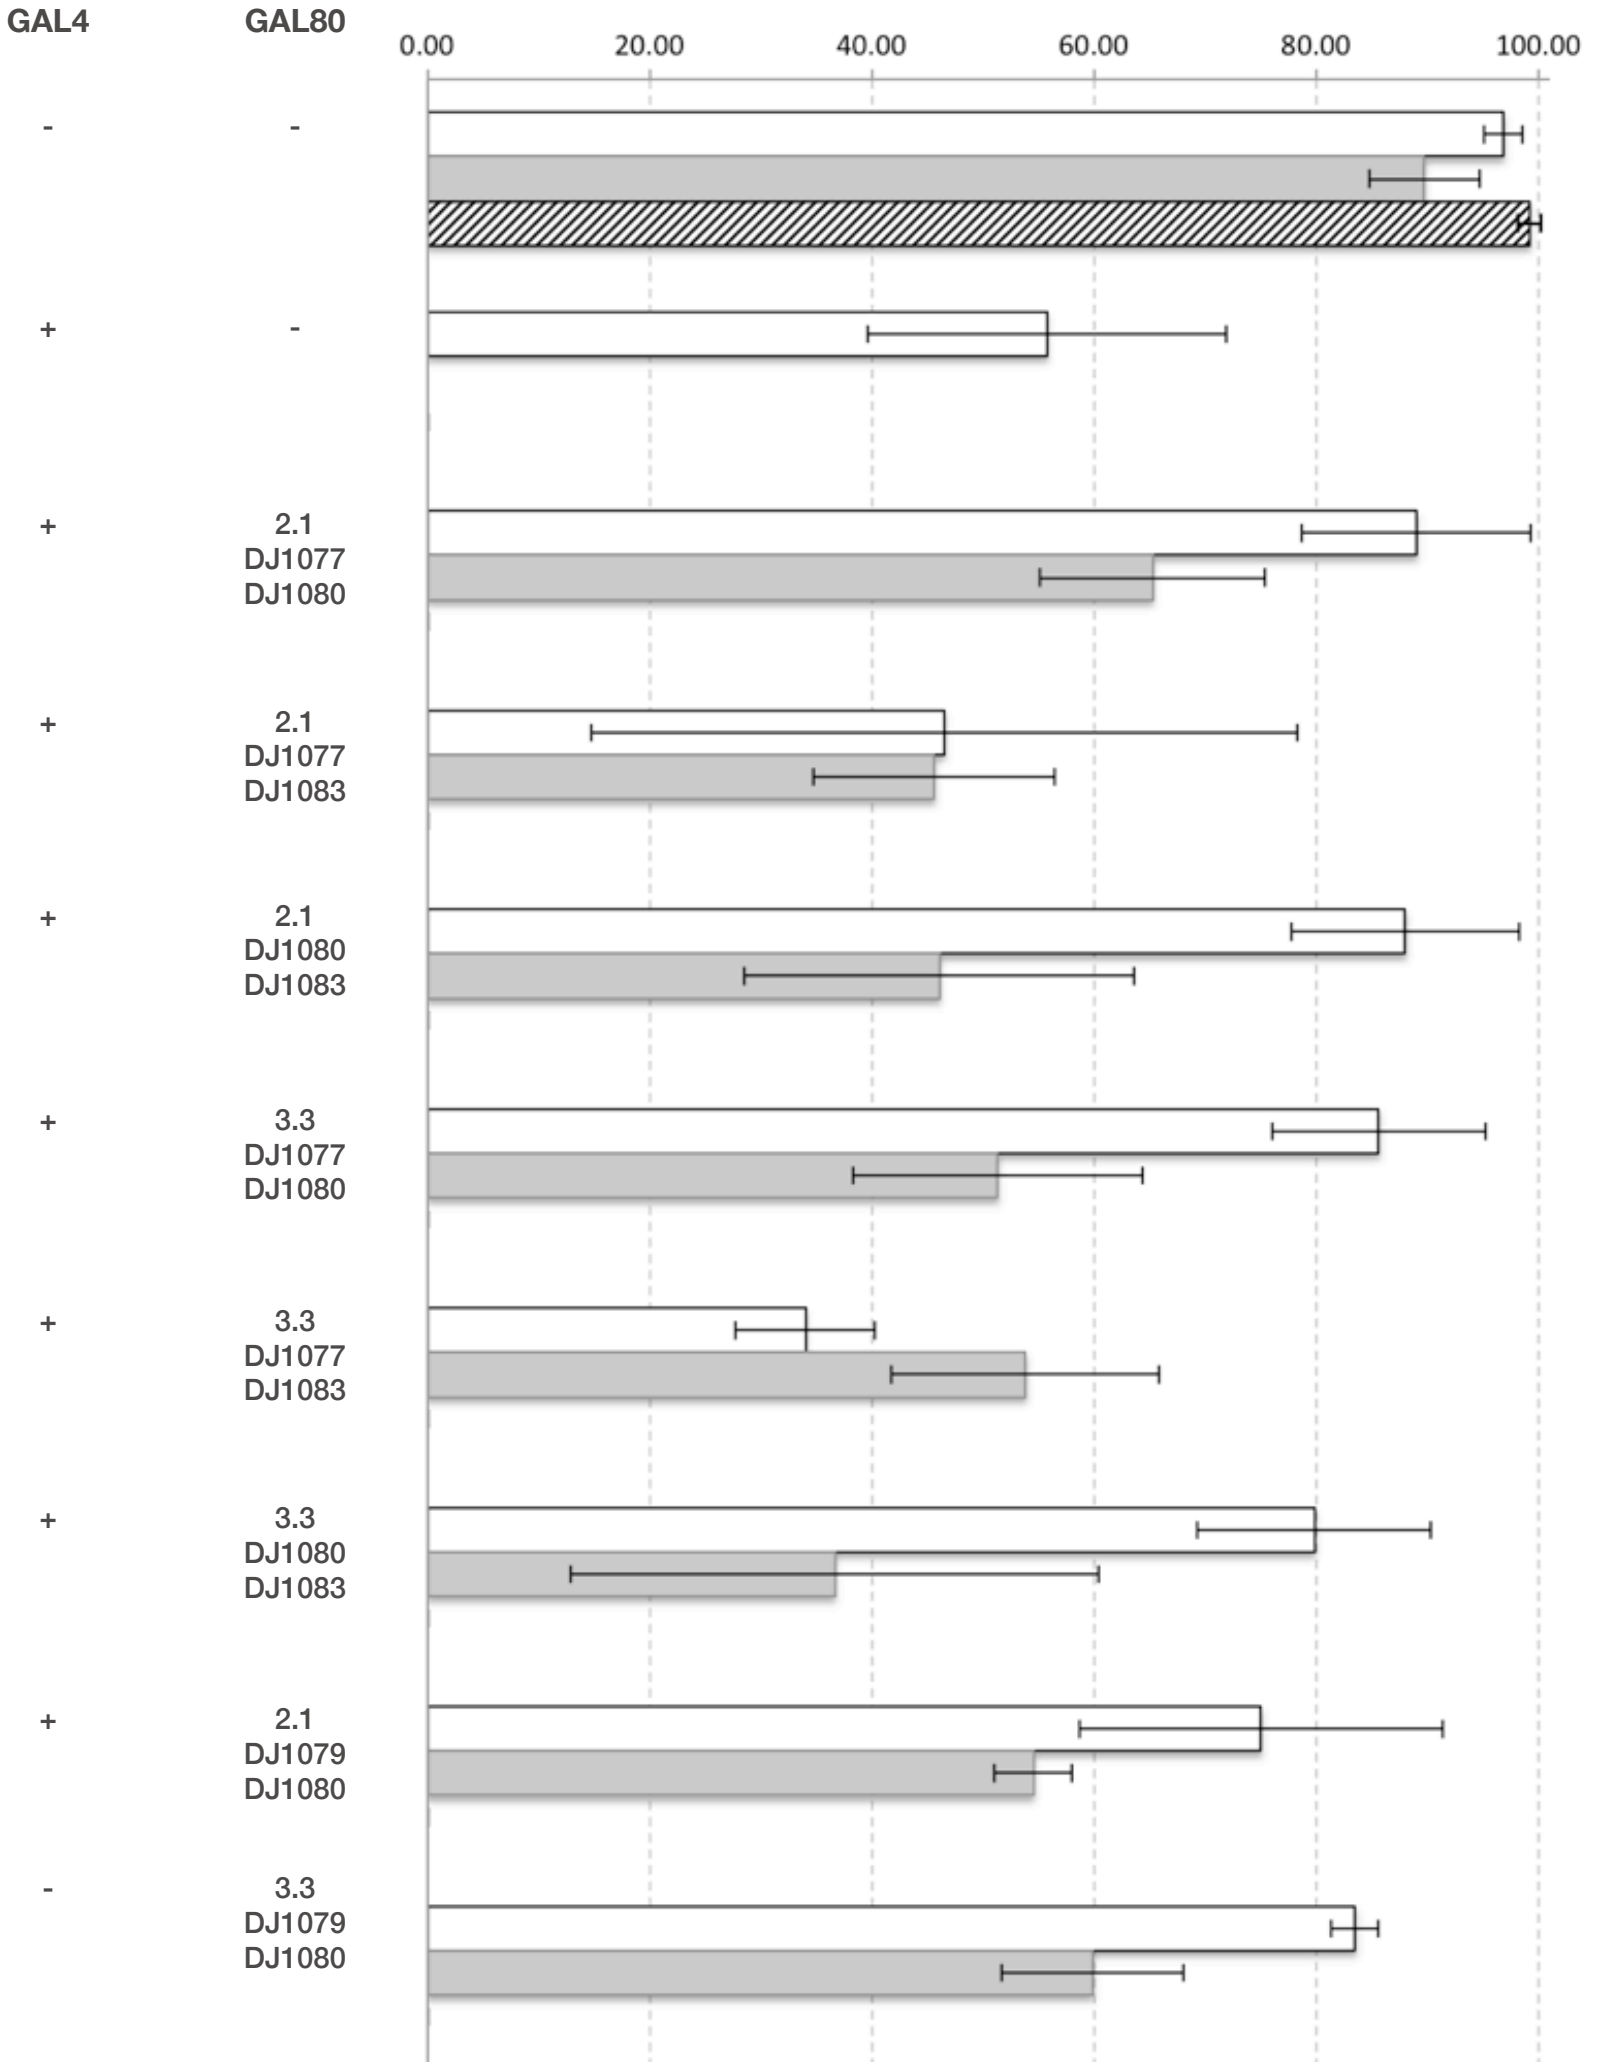

**Supplemental Figure 26** Grim lethality assay of 1 copy of DJ147 insertions and 2 copies of DJ146 insertions treated with ampicillin (30µg/ml) and tetracycline (50µg/ml). Horizontal axes shows average percent survival (% survival calculated as a % of the previous developmental stage). White bars indicate % of L1 larvae, grey bars indicate % of pupae, and striped bars indicate % of adults. Error bars represent  $\pm 2SD$ . Vertical axes indicates genotype, all genotypes contain a UAS-grim transgene but differ by the presence or absence of GAL4 and GAL80 insertion. GAL4 column displays presence (+) or absence (-) of GAL4 in the genotype, and the GAL80 column indicates the DJ146 and DJ147 insertions or an absence (-) of GAL80.



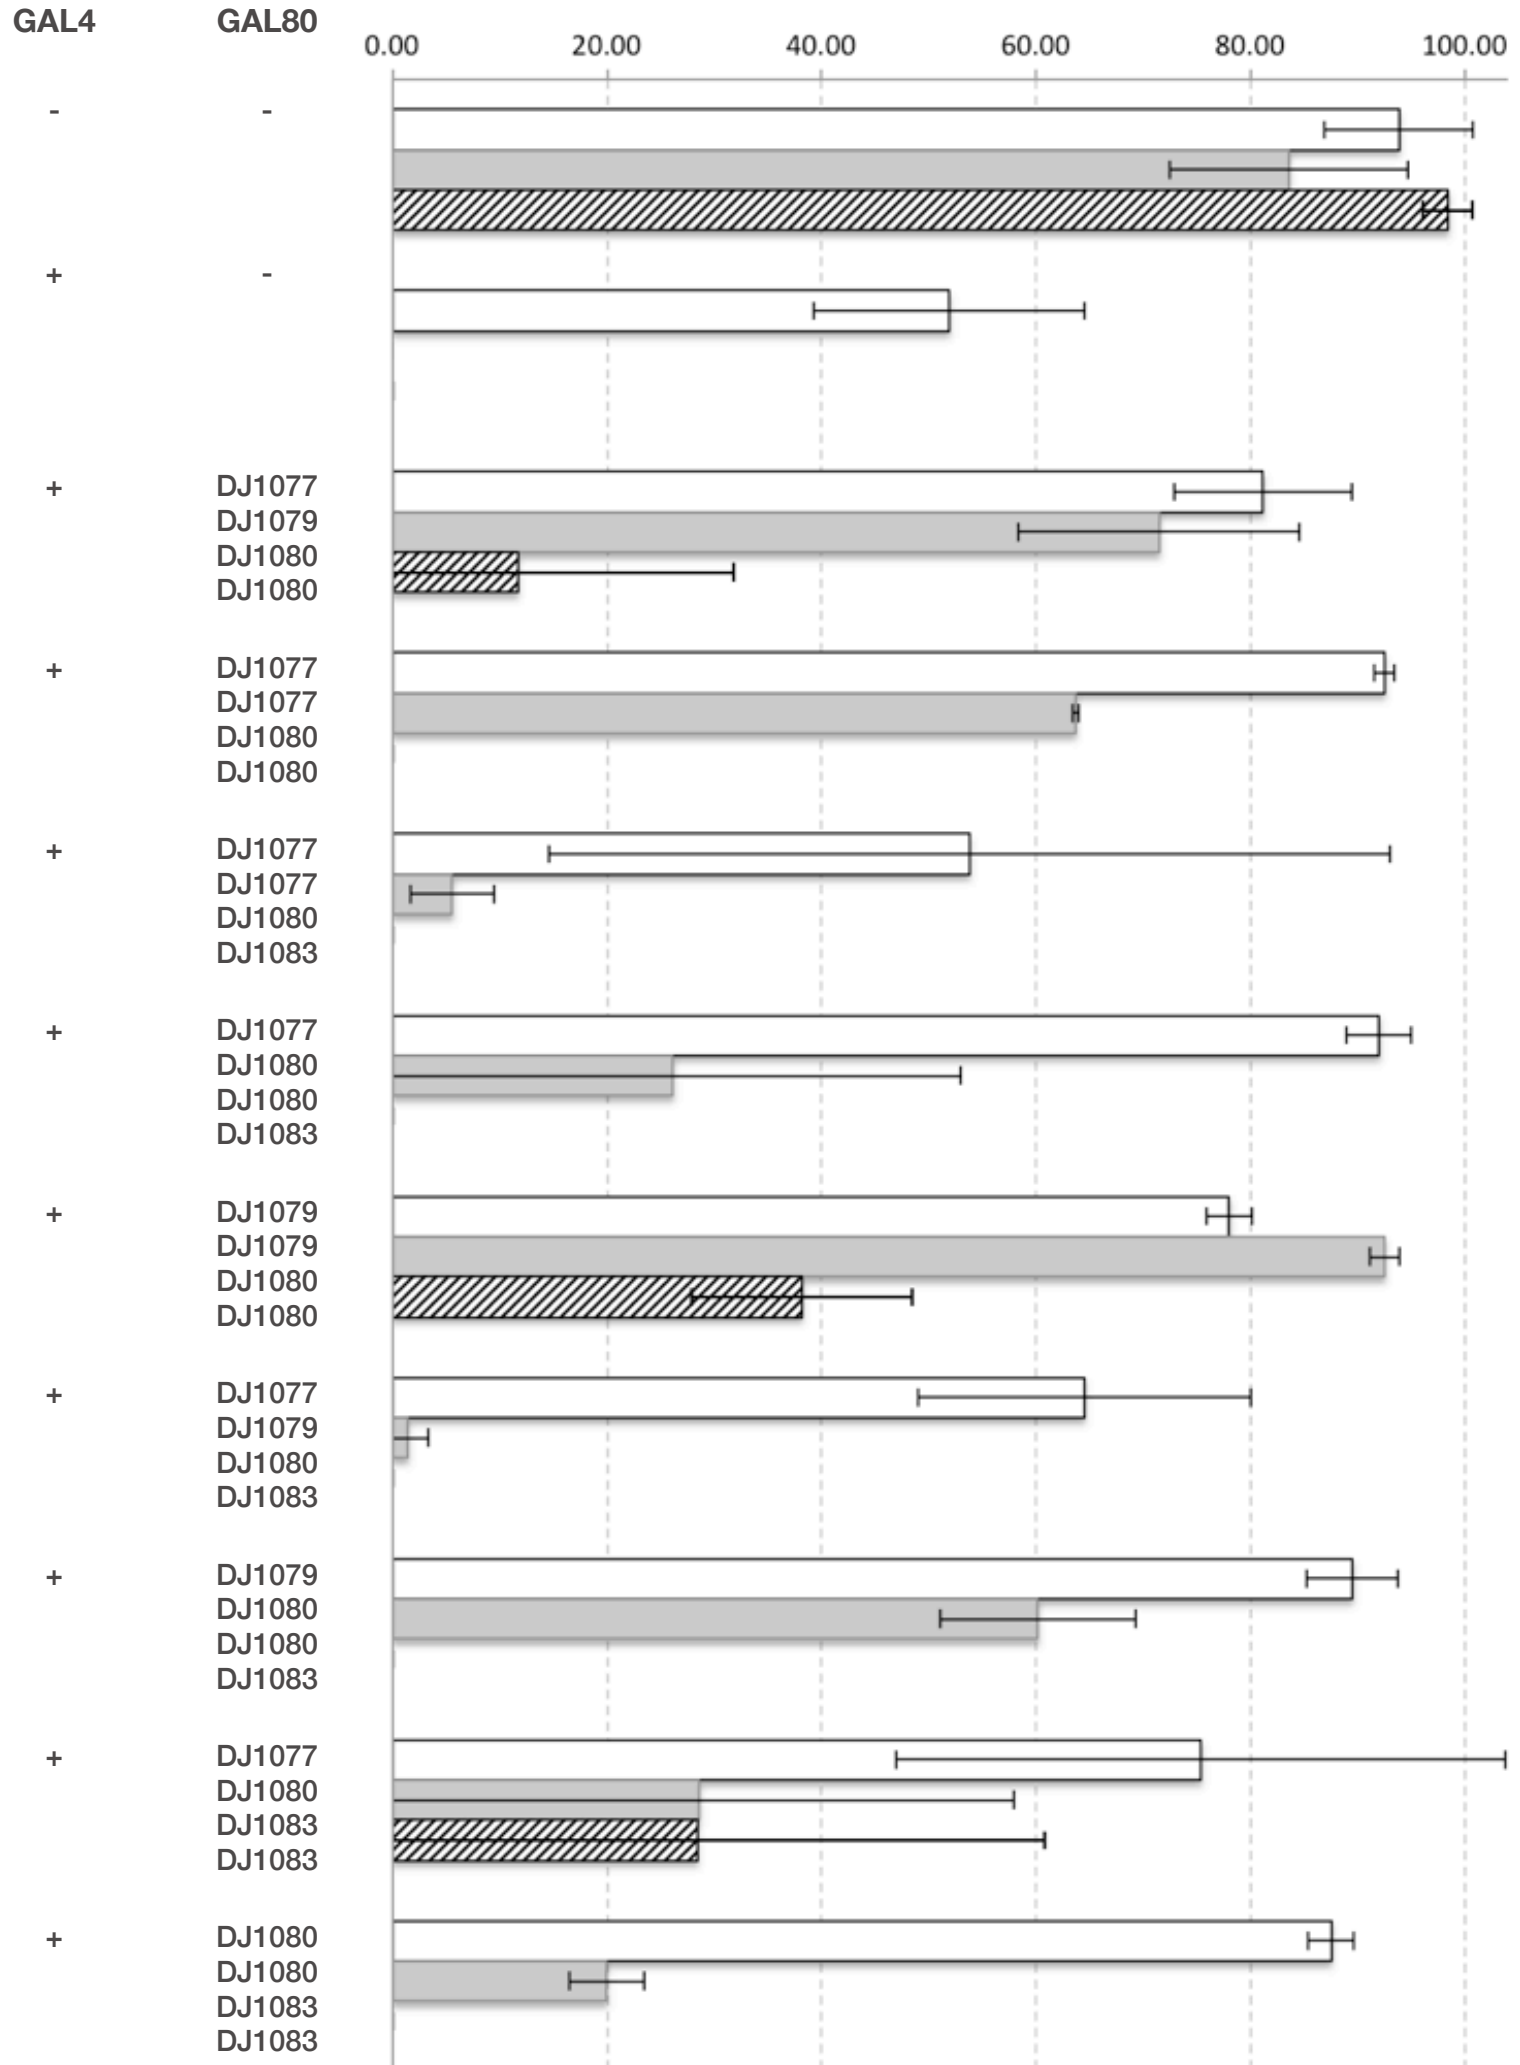

**Supplemental Figure 28** Grim lethality assay of 4 copies of DJ146 insertions treated with ampicillin (30µg/ml) and tetracycline (50µg/ml). Horizontal axes shows average percent survival (% survival calculated as a % of the previous developmental stage). White bars indicate % of L1 larvae, grey bars indicate % of pupae, and striped bars indicate % of adults. Error bars represent  $\pm 2SD$ . Vertical axes indicates genotype, all genotypes contain a UAS-grim transgene but differ by the presence or absence of GAL4 and GAL80 insertion. GAL4 column displays presence (+) or absence (-) of GAL4 in the genotype, and the GAL80 column indicates the DJ146 insertions or an absence (-) of GAL80.

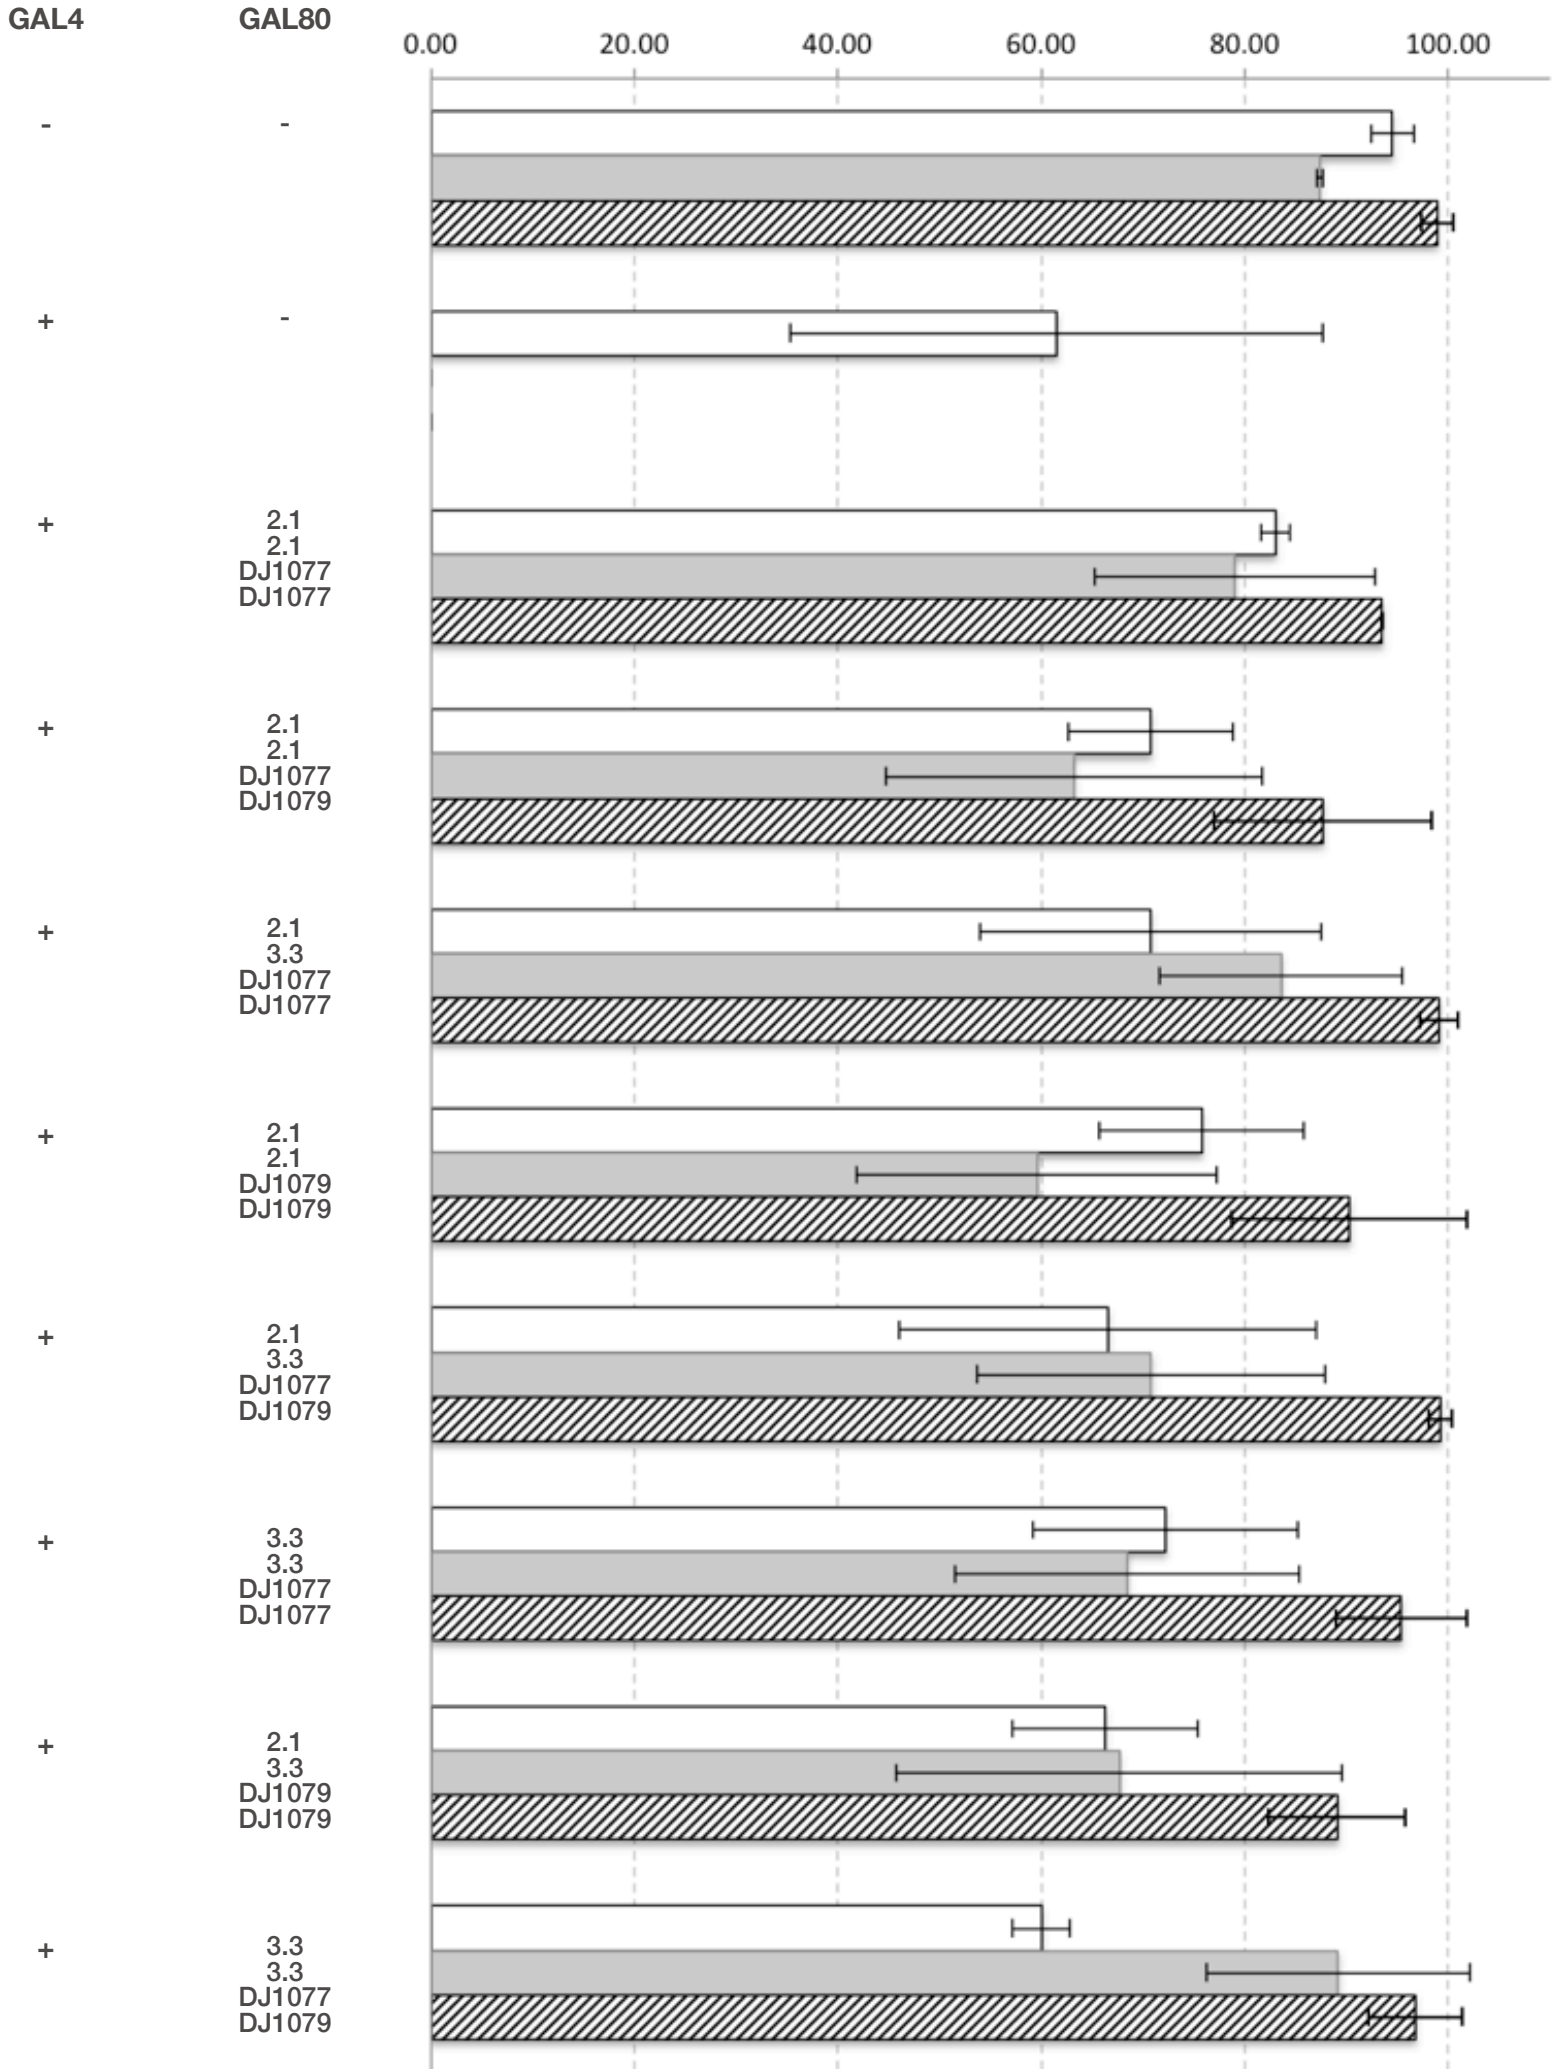

**Supplemental Figure 29** Grim lethality assay of 2 copies of DJ147 insertions and 2 copies of DJ146 insertions treated with ampicillin (30 $\mu$ g/ml). Horizontal axes shows average percent survival (% survival calculated as a % of the previous developmental stage). White bars indicate % of L1 larvae, grey bars indicate % of pupae, and striped bars indicate % of adults. Error bars represent  $\pm 2SD$ . Vertical axes indicates genotype, all genotypes contain a UAS-grim transgene but differ by the presence or absence of GAL4 and GAL80 insertion. GAL4 column displays presence (+) or absence (-) of GAL4 in the genotype, and the GAL80 column indicates the DJ147 and DJ146 insertions or an absence (-) of GAL80.



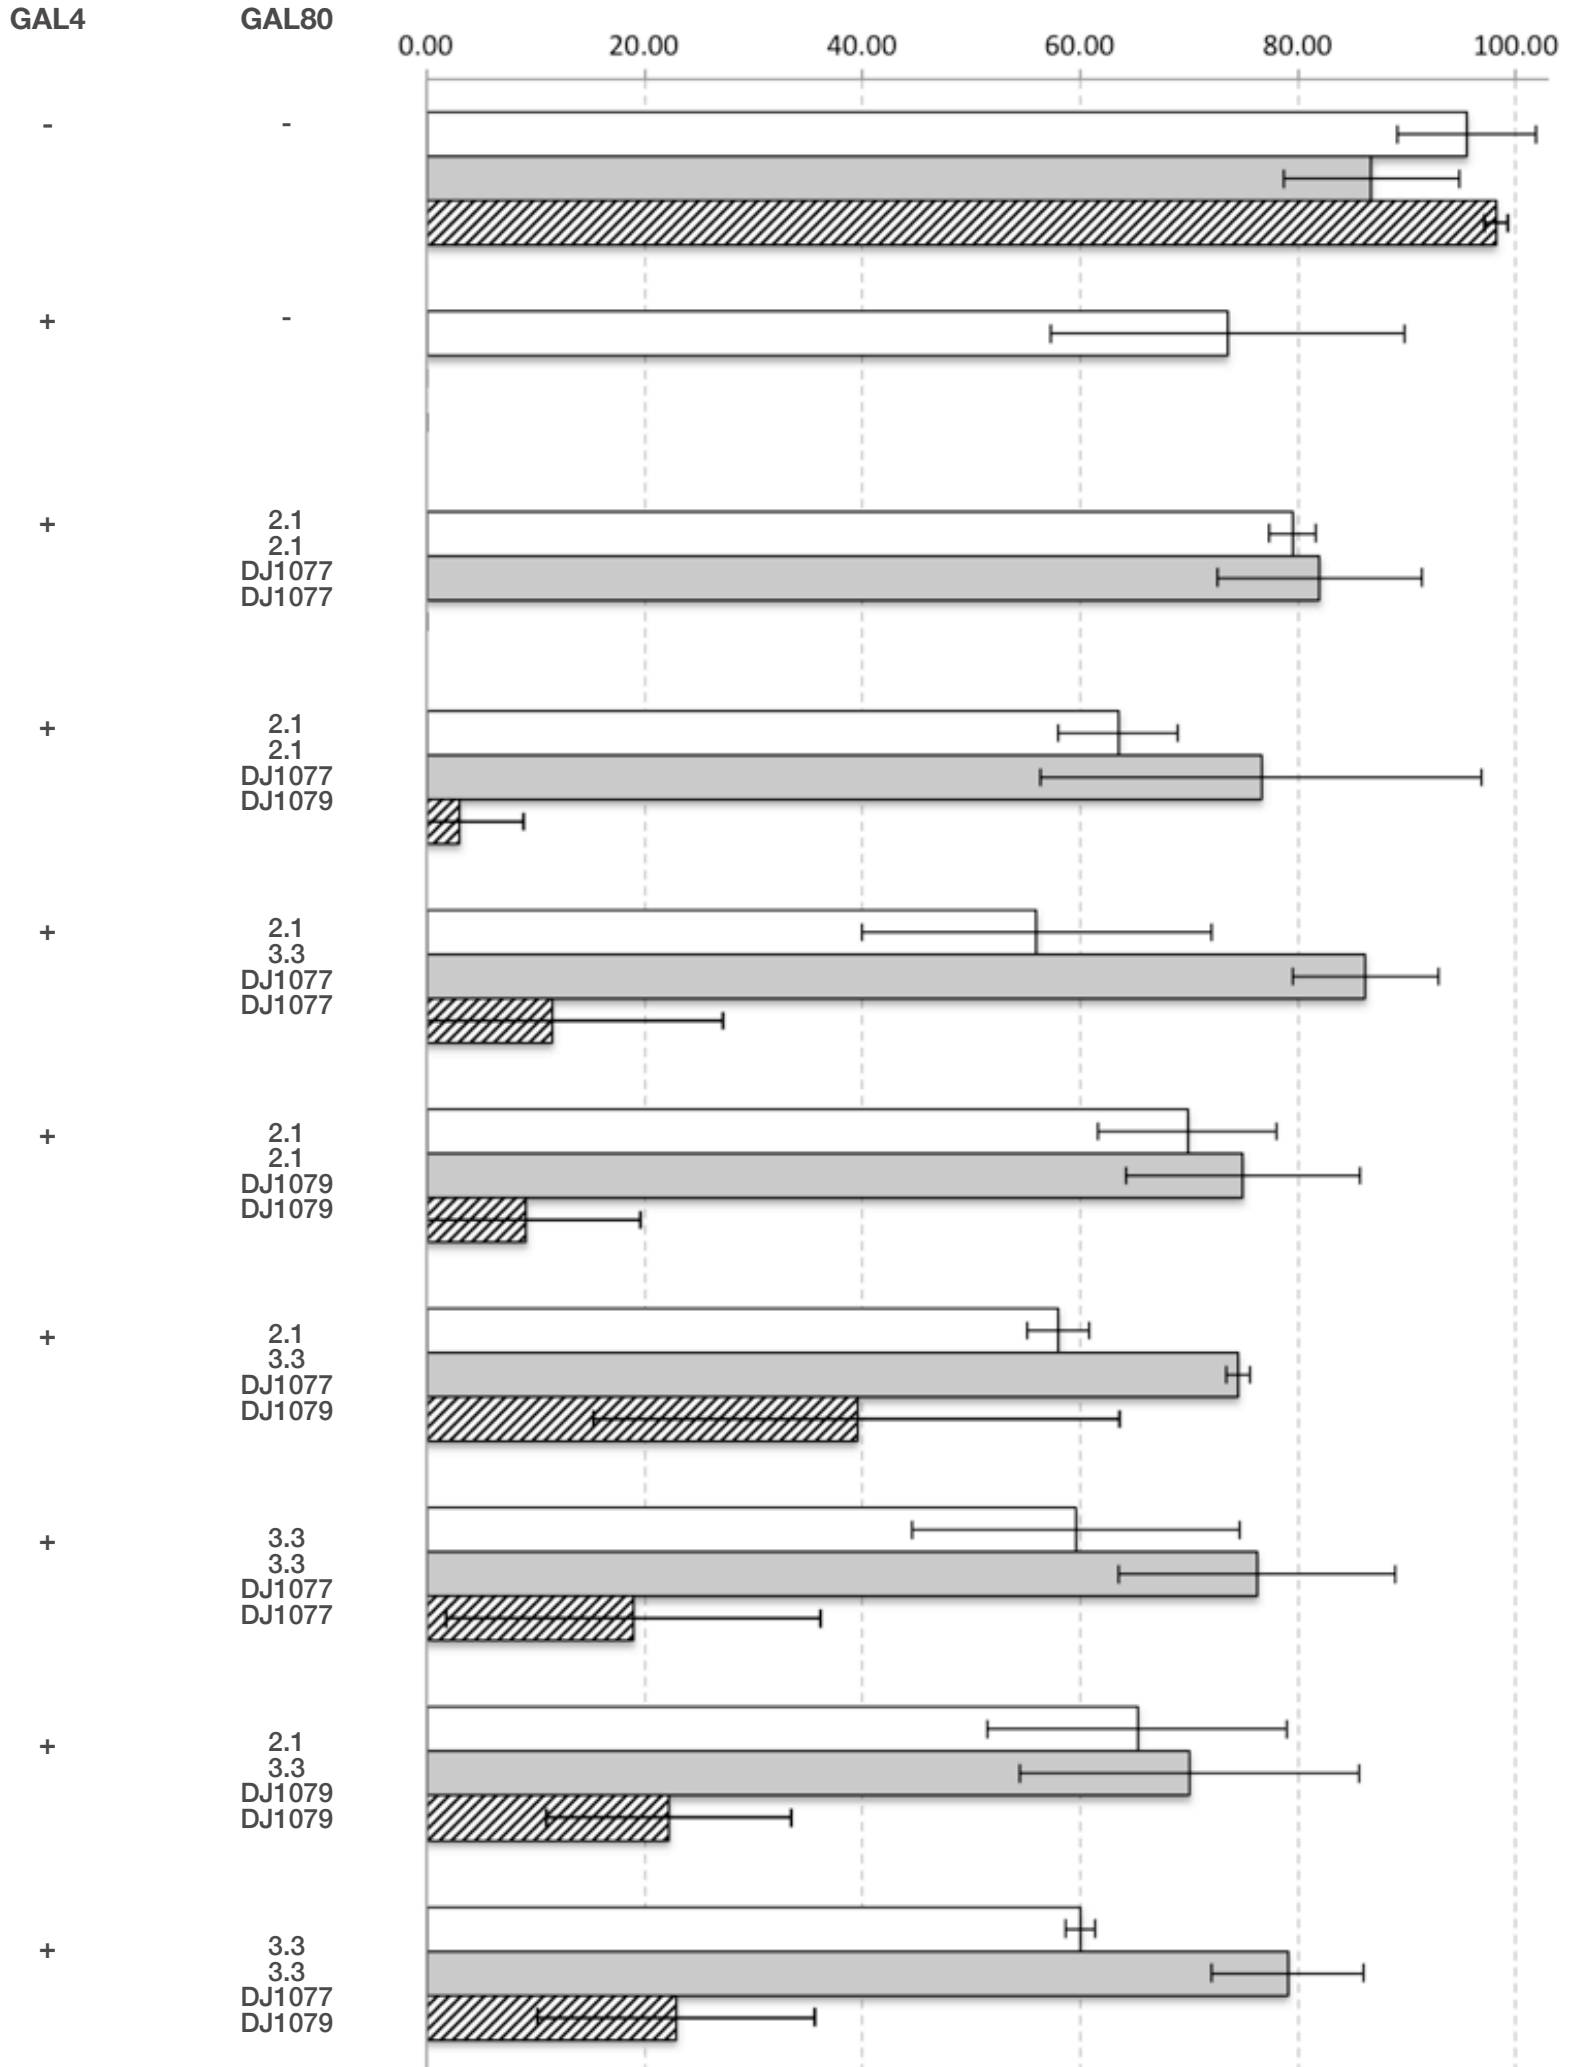

**Supplemental Figure 30** Grim lethality assay of 2 copies of DJ147 insertions and 2 copies of DJ146 insertions treated with ampicillin (30µg/ml) and tetracycline (50µg/ml). Horizontal axes shows average percent survival (% survival calculated as a % of the previous developmental stage). White bars indicate % of L1 larvae, grey bars indicate % of pupae, and striped bars indicate % of adults. Error bars represent  $\pm 2SD$ . Vertical axes indicates genotype, all genotypes contain a UAS-grim transgene but differ by the presence or absence of GAL4 and GAL80 insertion. GAL4 column displays presence (+) or absence (-) of GAL4 in the genotype, and the GAL80 column indicates the DJ147 and DJ146 insertions or an absence (-) of GAL80.

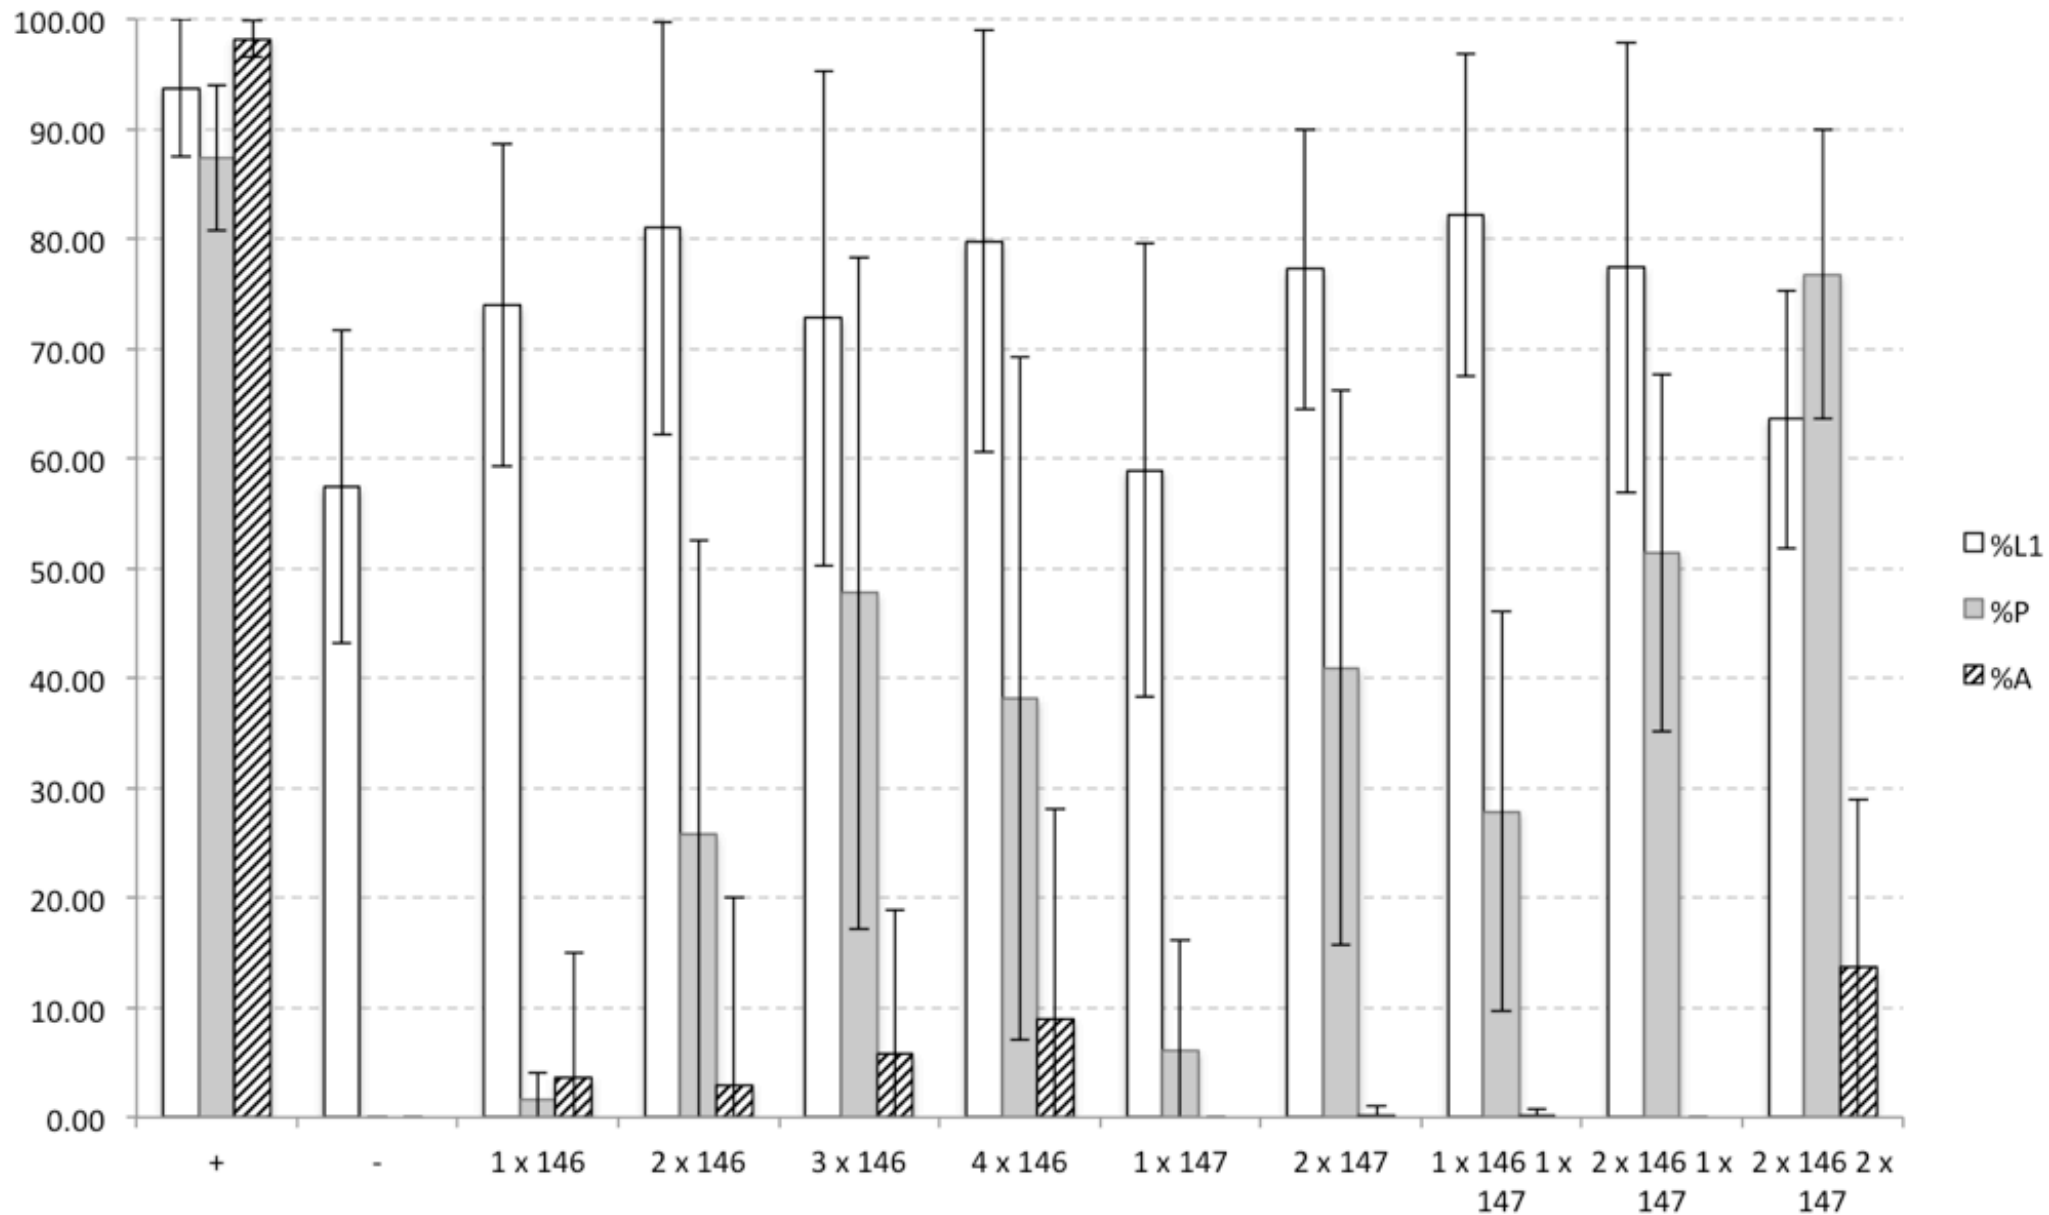

**Supplemental Figure 31** Relief of repression of GAL4 transcriptional activity by GAL80, as measured by grim lethality assay in the presence of inducer. Individuals are treated with tetracycline (50 $\mu$ g/ml) and ampicillin (30 $\mu$ g/ml) throughout development. Vertical axis represents average percent survival. White bars indicate percent L1. Grey bars indicate percent pupae. Striped bars indicate percent adults. Positive control animals (+) carry the UAS-grim transgene in the absence of GAL4 driver (UAS-grim/+). Negative control animals (-) carry the UAS-grim transgene and the GAL4 driver (DJ694/UAS-grim). Experimental animals carry the UAS-grim transgene, the GAL4 driver and GAL80 transgene(s). Error bars denote  $\pm 2SD$ .

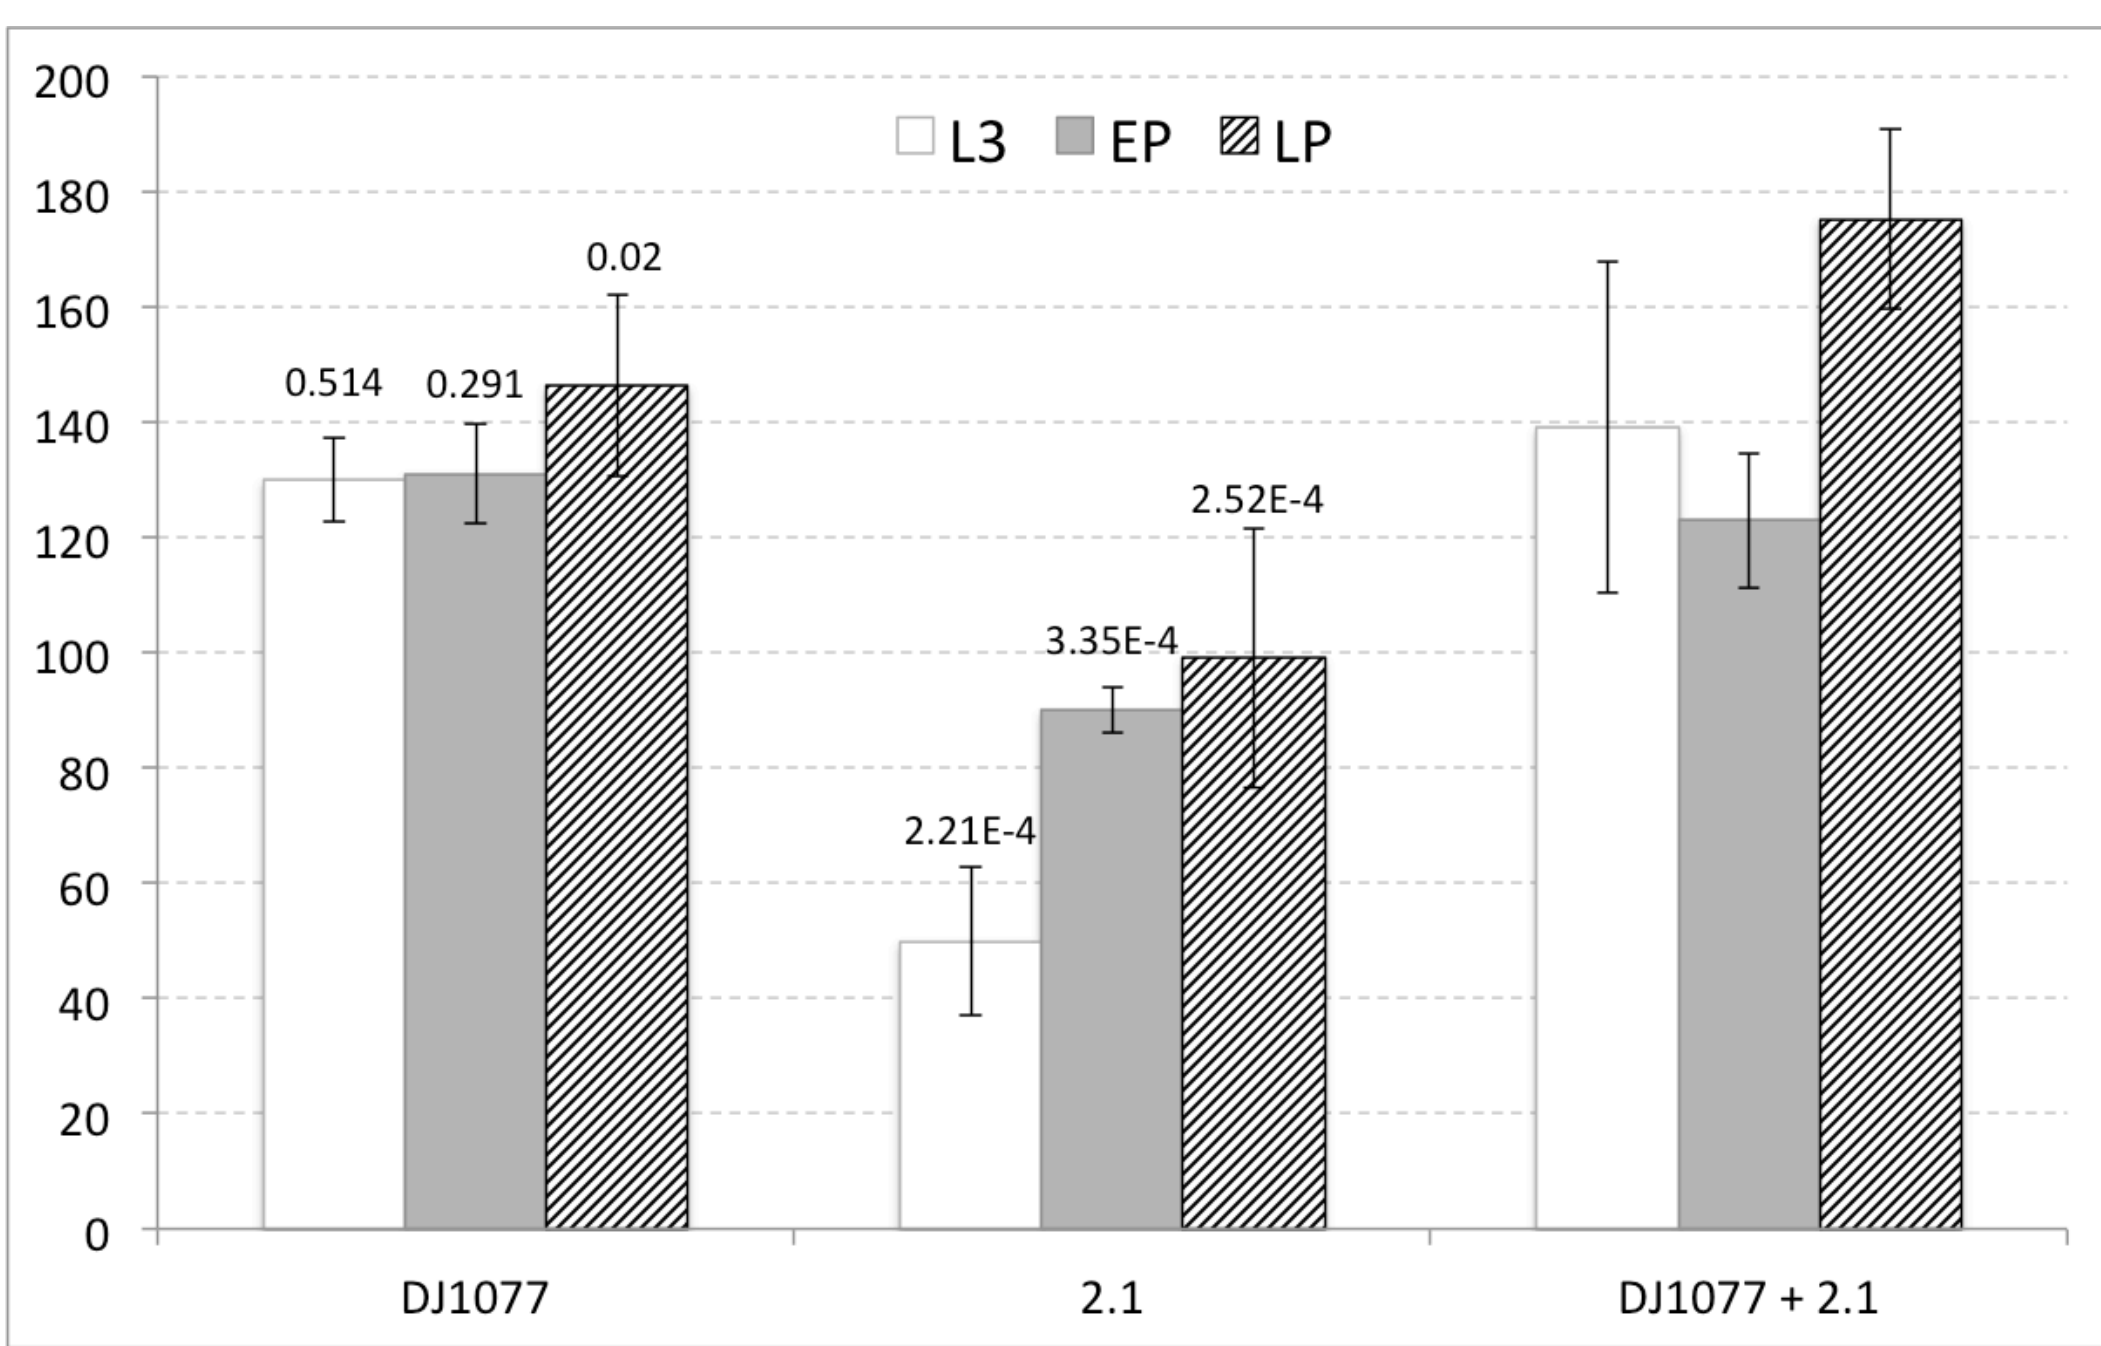

**Supplemental Figure 32** DJ146 and DJ147 tTA transcriptional activity during development measured using a tetO-lacZ reporter. The y-axis indicates the lacZ encoded  $\beta$ -galactosidase average specific activity ( $\Delta$ mOD562nm/min/ $\mu$ g protein). The x-axis indicates genotypes with one copy DJ146 (DJ1077), one copy DJ147 (2.1) and one copy of each (DJ1077 + 2.1). White bars represent measurements of L3 larvae, grey bars represent the measurements of early pupae and striped bars represent measurements of late pupae. Error bars represent  $\pm 2SD$  (n=5 per genotype, per stage). T-test statistical analysis was performed between the one copy genotypes and the two copy genotype for each measured stage, the p-values are indicated above the corresponding one copy bar.



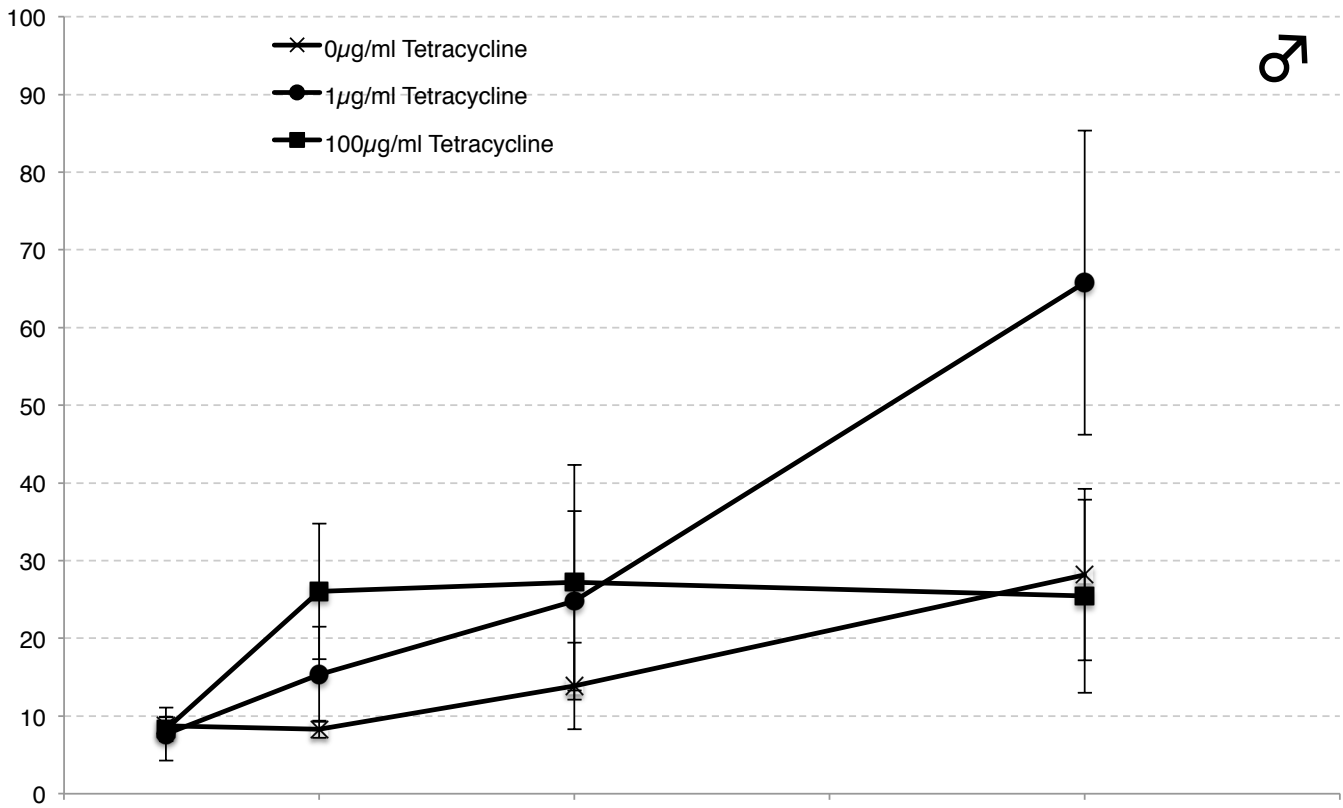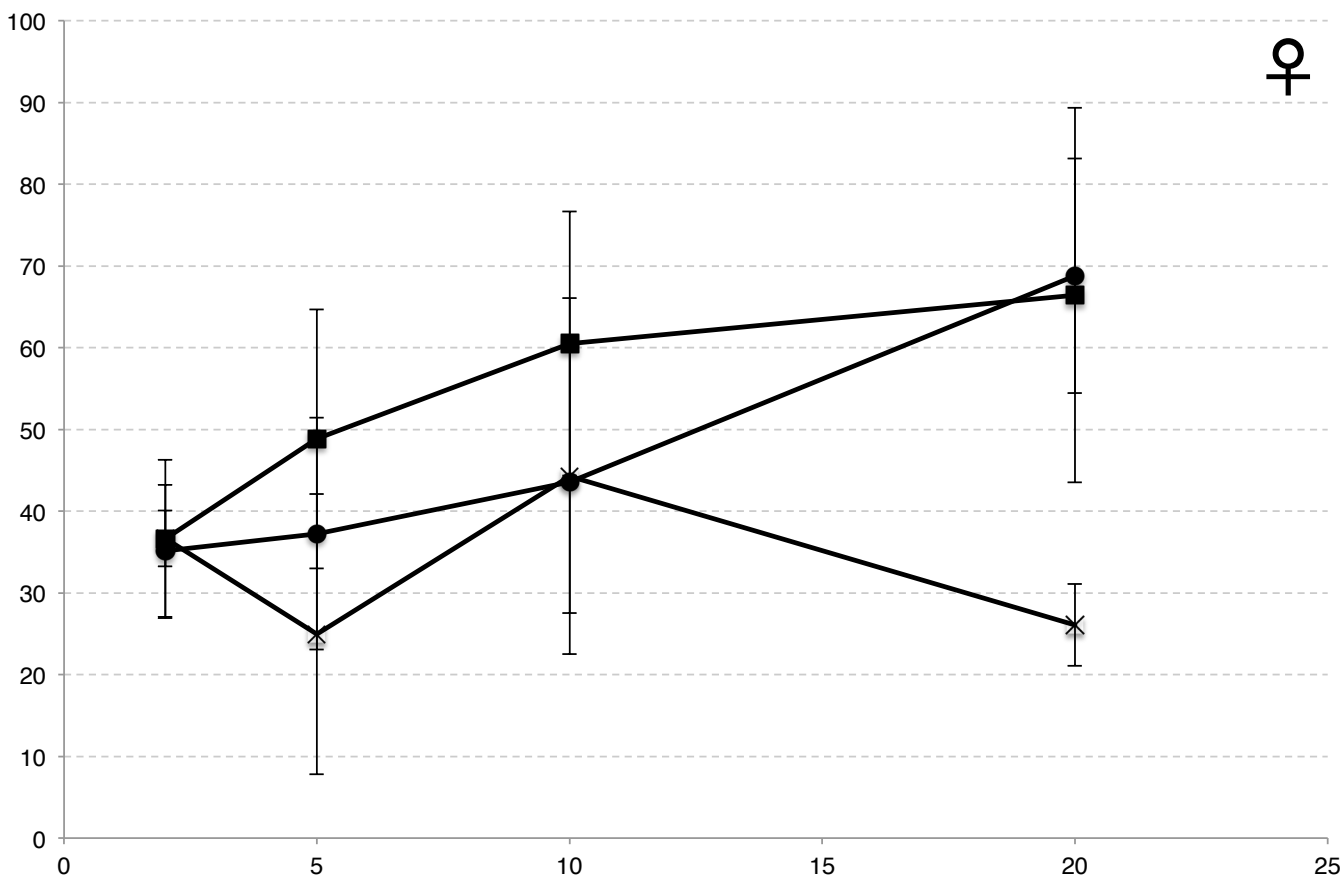

**Supplemental Figure 33** GAL4 transcriptional activity in 2x146 + 2x147 flies that were fed tetracycline (0, 1, or 100 μg/ml) starting at 20 days of age. The y-axis shows lacZ-encoded β-galactosidase activity normalized as a percentage of the positive control. β-galactosidase activity was measured as ΔmOD562nm per minute per fly. The x-axis shows the days on tetracycline (length of induction). Error bars represent ±SD (n=5 per tetracycline treatment per age).

0µg/ml

100µg/ml

Males

w1118

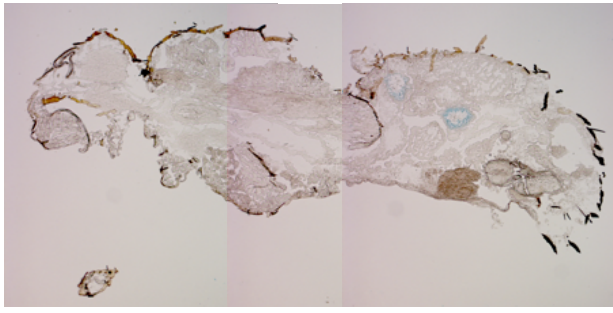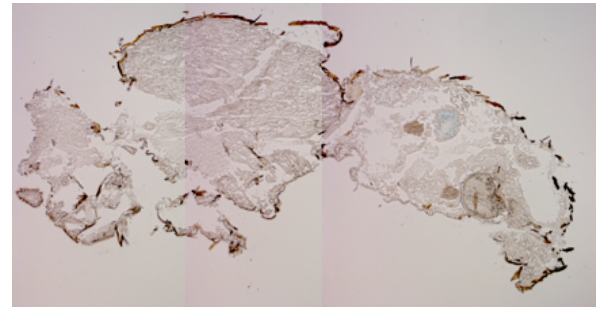

DJ694

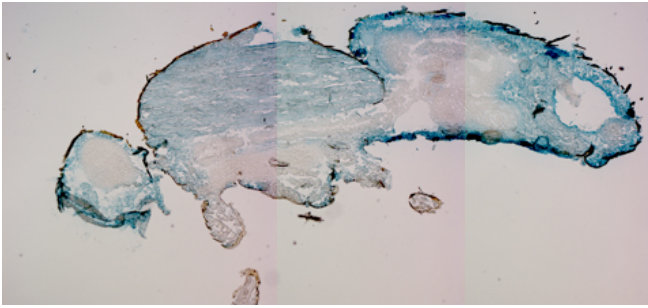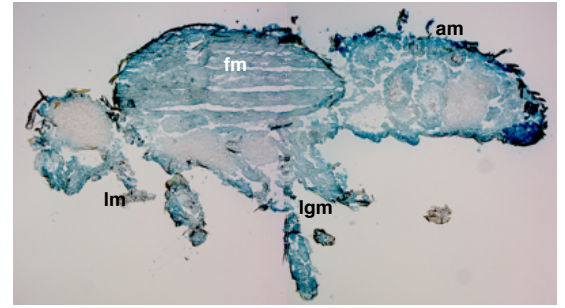

GAL80

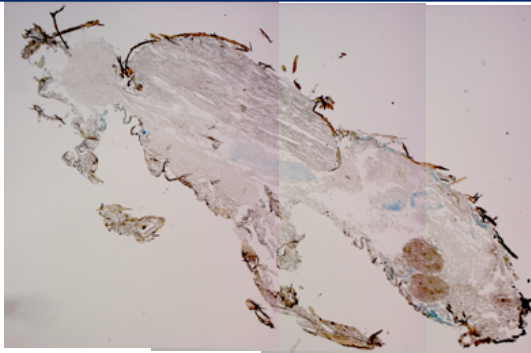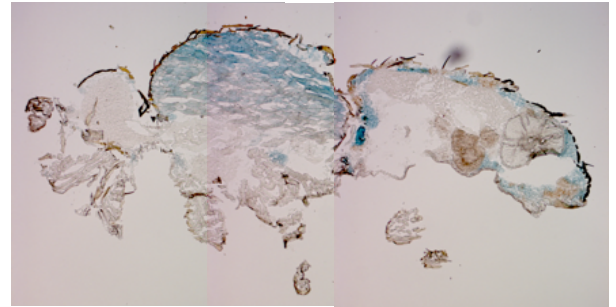

w1118

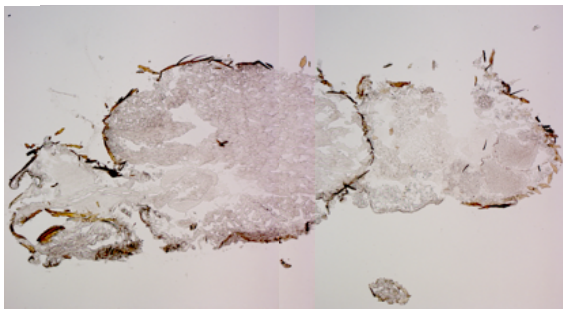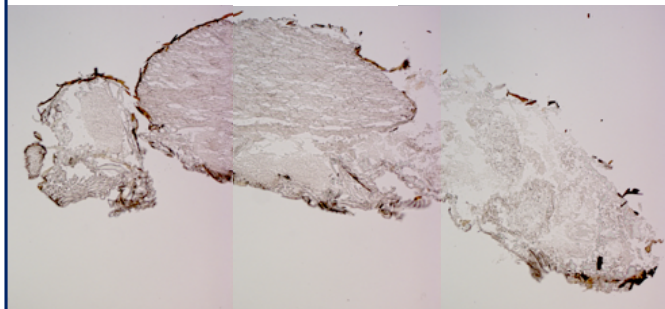

DJ694

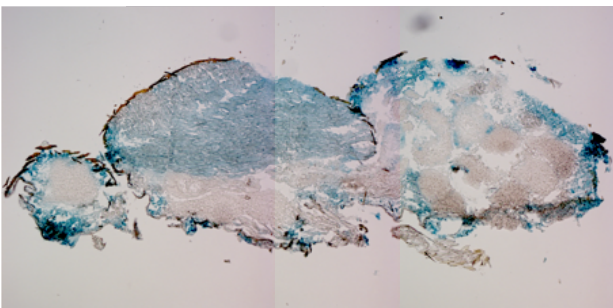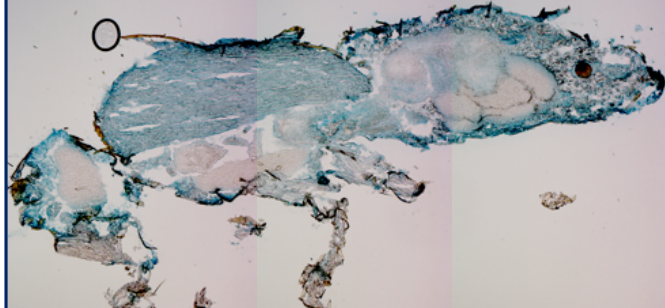

GAL80

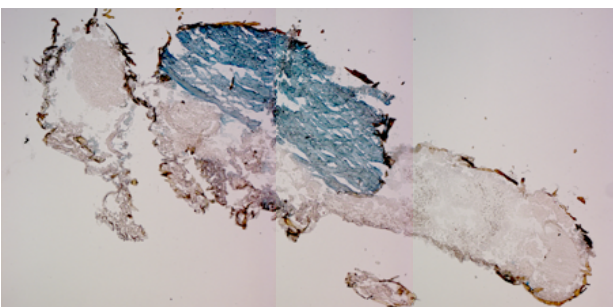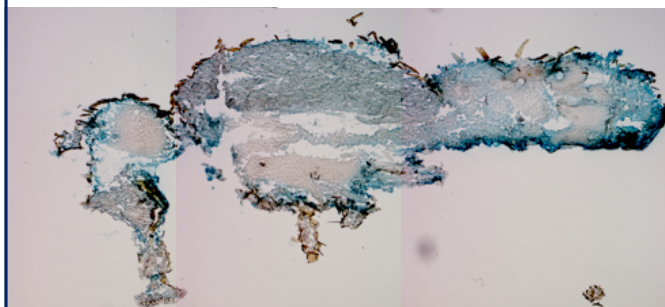

**Supplemental Figure 34** Tissue distribution of lacZ expression in 30 days old GAL80 male and female flies fed 0 or 100µg/ml of tetracycline beginning at 20 days of age. w1118 refers to negative control flies (w1118/+;UAS-lacZ/+). DJ694 refers to positive control flies (DJ694/UAS-lacZ). GAL80 refers to experimental flies with four copies of GAL80 (2X146 + 2X147) (DJ694/UAS-lacZ;3.3,DJ1077). Several pictures of the same section were stitched together to generate whole-fly views. lm: labial muscle; fm: flight muscle; lgm: leg muscle; am: abdominal muscle wall.

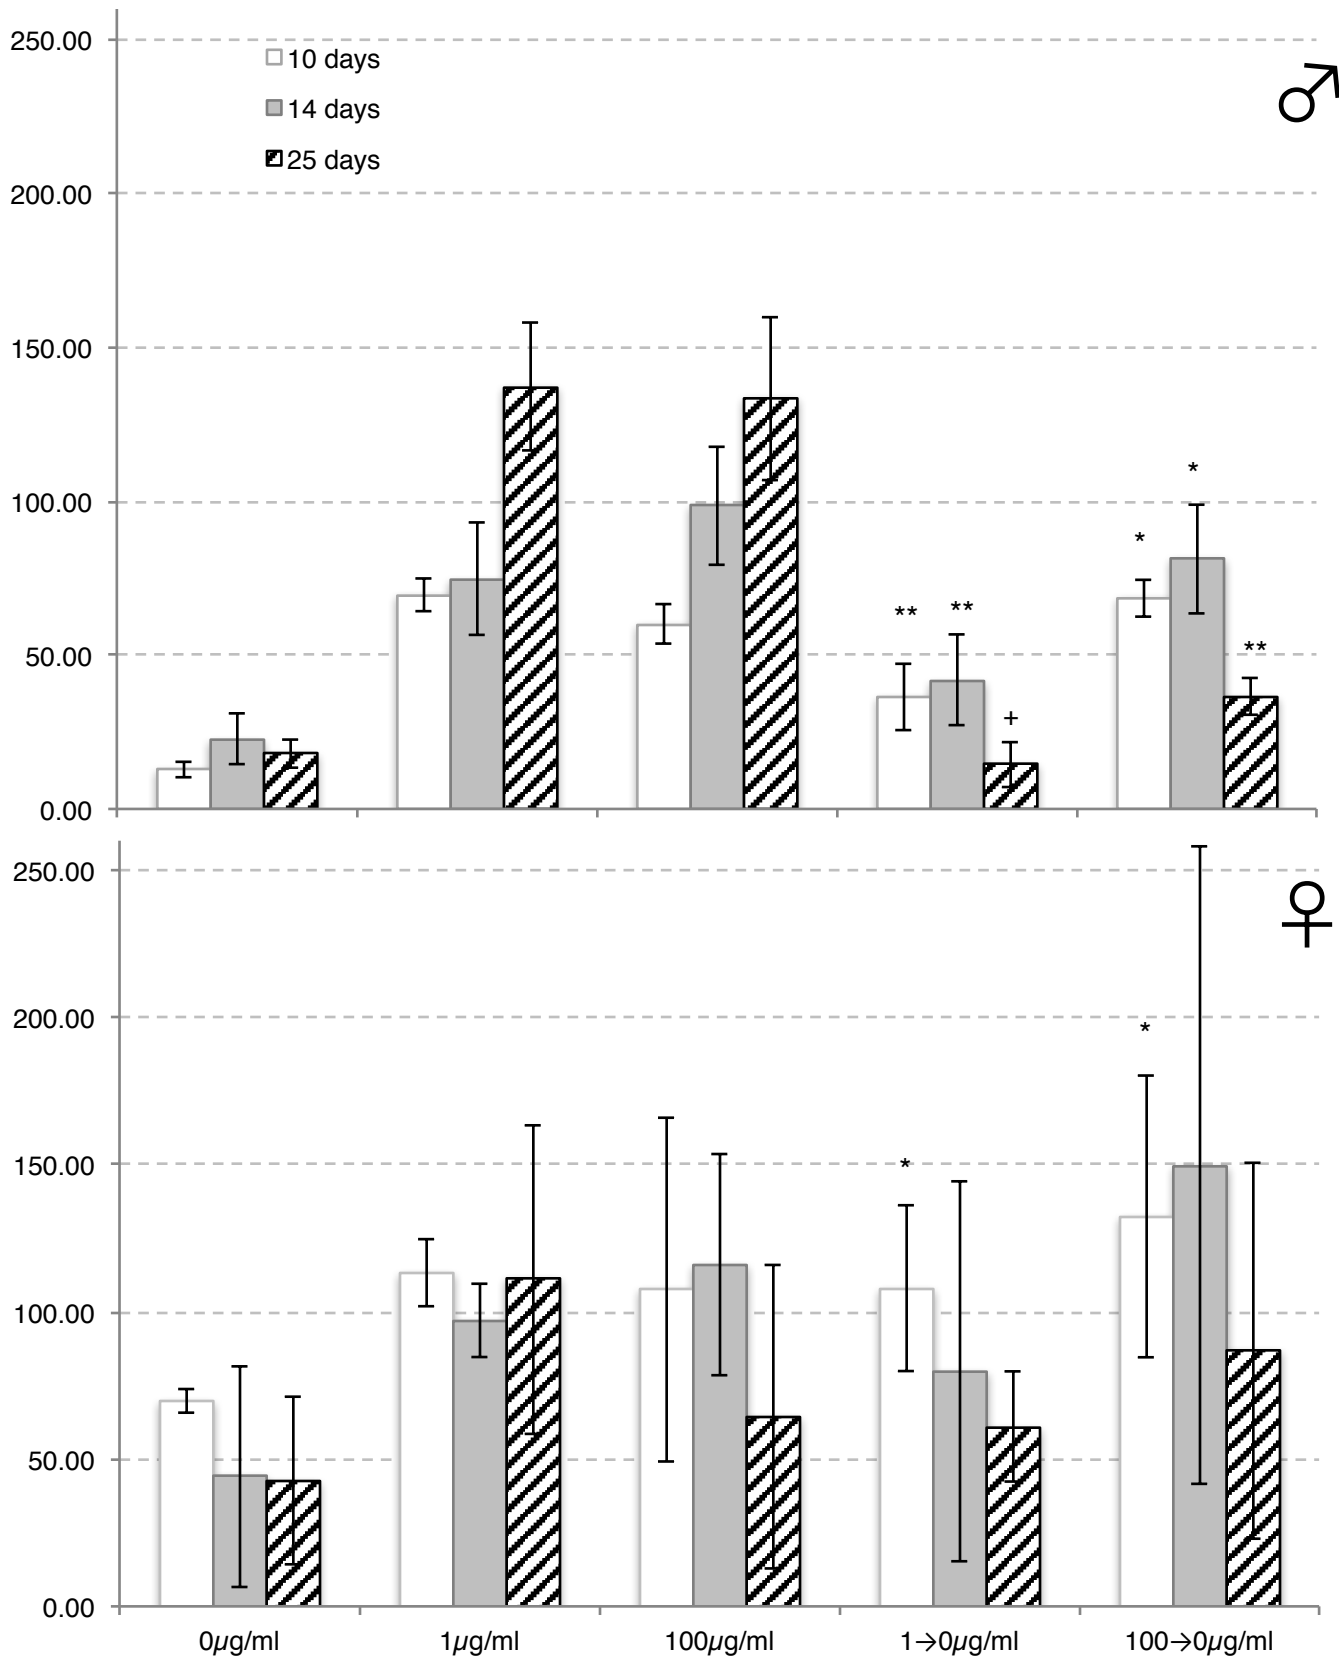

**Supplemental Figure 35** Kinetics of reestablishing repression of GAL4 transcriptional activity. Negative controls (0 μg/ml) were flies maintained on food containing no tetracycline for the duration of the experiment. Positive controls (1 and 100 μg/ml) were flies maintained on food containing 1 and 100 μg/ml of tetracycline for the duration of the experiment, respectively. Experimentals (1 → 0 and 100 → 0 μg/ml) were positive control flies switched to food with no tetracycline at 5 days of age. GAL4 transcriptional activity was measured at 10, 14, and 25 days of age. The y-axis shows the lacZ-encoded β-galactosidase activity normalized to the level seen with age and treatment matched DJ694 X UAS-lacZ flies. β-galactosidase activity was measured as ΔmOD562nm/min/fly. \*denotes significant difference (p<0.05) from the negative control; \*\*denotes significance from both the positive and negative controls; + denotes significance from the positive control. Error bars represent ±SD (n=5 per tetracycline treatment per age).

## **Supplemental tables**

*Supplemental Table 1: UAS-grim lethality assay data set.*

?: percentage of individuals remaining from the previous stage (average of at least 4 plates); SD: standard deviation.

| Parents    |                 | Date       | %L1                    | SD   | %P   | SD   | %A    | SD   | %L1     | SD   | %P   | SD  | %A    | SD  |
|------------|-----------------|------------|------------------------|------|------|------|-------|------|---------|------|------|-----|-------|-----|
| Male       | Female          |            | AMP                    |      |      |      |       |      | AMP/TET |      |      |     |       |     |
|            |                 |            | <b>DJ694 + 0 GAL80</b> |      |      |      |       |      |         |      |      |     |       |     |
| DJ694      | UAS-grim        | 04/13/2005 | 58.5                   | 11.1 | 0.0  | 0.0  | 0.0   | 0.0  |         |      |      |     |       |     |
|            |                 | 04/20/2005 | 54.0                   | 8.6  | 0.0  | 0.0  | 0.0   | 0.0  |         |      |      |     |       |     |
|            |                 | 04/27/2005 | 42.0                   | 20.3 | 0.0  | 0.0  | 0.0   | 0.0  | 80.5    | 5.8  | 0.0  | 0.0 | 0.0   | 0.0 |
|            |                 | 05/04/2005 | 68.0                   | 5.2  | 0.0  | 0.0  | 0.0   | 0.0  | 73.5    | 10.0 | 0.0  | 0.0 | 0.0   | 0.0 |
|            |                 | 05/11/2005 | 68.5                   | 11.0 | 0.7  | 1.9  | 0.0   | 0.0  | 52.0    | 6.8  | 0.0  | 0.0 | 0.0   | 0.0 |
|            |                 | 05/11/2005 | 66.0                   | 12.0 | 0.0  | 0.0  | 0.0   | 0.0  | 57.0    | 3.8  | 0.0  | 0.0 | 0.0   | 0.0 |
|            |                 | 05/18/2005 | 29.5                   | 6.8  | 0.0  | 0.0  | 0.0   | 0.0  | 25.0    | 27.6 | 0.0  | 0.0 | 0.0   | 0.0 |
|            |                 | 04/11/2006 | 72.0                   | 8.8  | 0.0  | 0.0  | 0.0   | 0.0  | 73.5    | 8.0  | 0.0  | 0.0 | 0.0   | 0.0 |
|            |                 | 01/26/2006 | 45.0                   | 4.8  | 0.0  | 0.0  | 0.0   | 0.0  | 44.5    | 4.7  | 0.0  | 0.0 | 0.0   | 0.0 |
|            |                 | 04/19/2006 | 59.0                   | 6.3  | 0.0  | 0.0  | 0.0   | 0.0  | 79.5    | 7.5  | 0.0  | 0.0 | 0.0   | 0.0 |
|            |                 | 04/25/2006 | 62.0                   | 9.1  | 0.0  | 0.0  | 0.0   | 0.0  | 58.5    | 9.1  | 0.0  | 0.0 | 0.0   | 0.0 |
|            |                 | 05/02/2006 | 57.5                   | 9.1  | 0.0  | 0.0  | 0.0   | 0.0  | 69.5    | 8.3  | 0.0  | 0.0 | 0.0   | 0.0 |
|            |                 | 05/09/2006 | 36.5                   | 8.9  | 0.0  | 0.0  | 0.0   | 0.0  | 56.0    | 9.3  | 0.0  | 0.0 | 0.0   | 0.0 |
|            |                 | 05/16/2006 | 49.5                   | 11.3 | 0.0  | 0.0  | 0.0   | 0.0  | 61.5    | 8.5  | 0.0  | 0.0 | 0.0   | 0.0 |
|            |                 | 05/24/2006 | 35.5                   | 8.7  | 0.0  | 0.0  | 0.0   | 0.0  | 47.5    | 9.2  | 0.0  | 0.0 | 0.0   | 0.0 |
|            |                 | 05/30/2006 | 50.5                   | 9.8  | 0.0  | 0.0  | 0.0   | 0.0  | 51.5    | 7.8  | 0.0  | 0.0 | 0.0   | 0.0 |
|            |                 | 06/06/2006 | 24.5                   | 7.2  | 0.0  | 0.0  | 0.0   | 0.0  | 47.5    | 11.0 | 0.0  | 0.0 | 0.0   | 0.0 |
|            |                 | 06/13/2006 | 24.0                   | 11.1 | 0.0  | 0.0  | 0.0   | 0.0  | 32.0    | 3.0  | 0.0  | 0.0 | 0.0   | 0.0 |
|            |                 | 06/20/2006 | 69.0                   | 8.5  | 0.0  | 0.0  | 0.0   | 0.0  | 62.5    | 7.4  | 0.0  | 0.0 | 0.0   | 0.0 |
|            |                 | 09/26/2006 | 61.0                   | 17.3 | 0.0  | 0.0  | 0.0   | 0.0  | 47.5    | 13.3 | 0.0  | 0.0 | 0.0   | 0.0 |
|            |                 | 10/05/2006 | 36.0                   | 10.3 | 0.0  | 0.0  | 0.0   | 0.0  | 38.0    | 10.6 | 0.0  | 0.0 | 0.0   | 0.0 |
|            |                 | 10/12/2006 | 36.0                   | 10.3 | 0.0  | 0.0  | 0.0   | 0.0  | 38.0    | 10.6 | 0.0  | 0.0 | 0.0   | 0.0 |
|            |                 | 10/19/2006 | 37.0                   | 6.0  | 0.0  | 0.0  | 0.0   | 0.0  | 52.0    | 5.7  | 0.0  | 0.0 | 0.0   | 0.0 |
|            |                 | 10/19/2006 | 37.0                   | 3.0  | 0.0  | 0.0  | 0.0   | 0.0  | 52.0    | 2.8  | 0.0  | 0.0 | 0.0   | 0.0 |
|            |                 | 10/23/2006 | 73.0                   | 13.2 | 0.0  | 0.0  | 0.0   | 0.0  | 63.0    | 3.8  | 0.0  | 0.0 | 0.0   | 0.0 |
|            |                 | 10/23/2006 | 73.0                   | 6.6  | 0.0  | 0.0  | 0.0   | 0.0  | 63.0    | 1.9  | 0.0  | 0.0 | 0.0   | 0.0 |
|            |                 | 11/02/2006 | 34.0                   | 14.0 | 0.0  | 0.0  | 0.0   | 0.0  | 57.0    | 12.8 | 0.0  | 0.0 | 0.0   | 0.0 |
|            |                 | 11/02/2006 | 34.0                   | 7.0  | 0.0  | 0.0  | 0.0   | 0.0  | 57.0    | 6.4  | 0.0  | 0.0 | 0.0   | 0.0 |
|            |                 | 11/16/2006 | 61.0                   | 5.7  | 0.0  | 0.0  | 0.0   | 0.0  | 63.0    | 1.0  | 0.0  | 0.0 | 0.0   | 0.0 |
|            |                 | 11/23/2006 | 42.0                   | 4.8  | 0.0  | 0.0  | 0.0   | 0.0  | 51.0    | 6.0  | 0.0  | 0.0 | 0.0   | 0.0 |
|            |                 | 12/07/2006 | 88.0                   | 3.3  | 0.0  | 0.0  | 0.0   | 0.0  | 89.0    | 2.5  | 0.0  | 0.0 | 0.0   | 0.0 |
|            |                 | 12/14/2006 | 63.0                   | 2.5  | 0.0  | 0.0  | 0.0   | 0.0  | 56.0    | 4.9  | 0.0  | 0.0 | 0.0   | 0.0 |
|            |                 | 12/14/2006 | 44.0                   | 3.7  | 0.0  | 0.0  | 0.0   | 0.0  | 51.0    | 3.4  | 0.0  | 0.0 | 0.0   | 0.0 |
| 05/18/2005 | 60.5            | 6.9        | 0.0                    | 0.0  | 0.0  | 0.0  | 55.5  | 9.4  | 0.0     | 0.0  | 0.0  | 0.0 |       |     |
| 11/27/2007 | 80.0            | 3.3        | 0.0                    | 0.0  | 0.0  | 0.0  | 85.0  | 6.0  | 0.0     | 0.0  | 0.0  | 0.0 |       |     |
| 12/18/2007 | 43.0            | 6.8        | 0.0                    | 0.0  | 0.0  | 0.0  | 62.0  | 14.8 | 0.0     | 0.0  | 0.0  | 0.0 |       |     |
|            |                 |            | 52.1                   | 3.9  | 0.0  | 0.3  | 0.0   | 0.0  | 57.4    | 4.9  | 0.0  | 0.0 | 0.0   | 0.0 |
|            |                 |            | <b>DJ1077</b>          |      |      |      |       |      |         |      |      |     |       |     |
| w          | UAS-grim;DJ1077 | 04/13/2005 | 93.5                   | 3.7  | 73.3 | 10.9 | 98.8  | 9.8  |         |      |      |     |       |     |
|            |                 | 05/11/2005 | 93.3                   | 7.0  | 90.0 | 6.0  | 97.5  | 2.7  | 91.6    | 8.6  | 84.5 | 7.6 | 100.0 | 0.0 |
|            |                 |            | 93.4                   | 0.1  | 81.6 | 11.8 | 98.2  | 0.9  | 91.6    | 8.6  | 84.5 | 7.6 | 100.0 | 0.0 |
|            |                 |            | <b>DJ1078</b>          |      |      |      |       |      |         |      |      |     |       |     |
| w          | UAS-grim;DJ1078 | 04/13/2005 | 96.5                   | 3.3  | 88.5 | 9.5  | 99.5  | 1.4  |         |      |      |     |       |     |
|            |                 | 05/11/2005 | 87.5                   | 9.7  | 88.6 | 8.3  | 100.0 | 0.0  | 91.6    | 8.6  | 91.6 | 8.7 | 98.9  | 2.1 |
|            |                 |            | 92.0                   | 6.4  | 88.5 | 0.1  | 99.7  | 0.4  | 91.6    | 8.6  | 91.6 | 8.7 | 98.9  | 2.1 |
|            |                 |            | <b>DJ1079</b>          |      |      |      |       |      |         |      |      |     |       |     |
| w          | UAS-grim;DJ1079 | 04/13/2005 | 90.5                   | 5.6  | 90.7 | 4.7  | 95.9  | 6.2  |         |      |      |     |       |     |
|            |                 | 05/11/2005 | 86.1                   | 7.5  | 93.9 | 5.9  | 99.4  | 1.6  | 93.0    | 7.9  | 87.8 | 7.1 | 98.8  | 2.2 |
|            |                 |            | 88.3                   | 3.1  | 92.3 | 2.3  | 97.7  | 2.5  | 93.0    | 7.9  | 87.8 | 7.1 | 98.8  | 2.2 |
|            |                 |            | <b>DJ1080</b>          |      |      |      |       |      |         |      |      |     |       |     |
| w          | UAS-grim;DJ1080 | 04/20/2005 | 96.5                   | 2.6  | 90.7 | 4.9  | 95.2  | 5.6  |         |      |      |     |       |     |
|            |                 | 05/11/2005 | 90.5                   | 9.5  | 84.3 | 4.9  | 97.5  | 3.9  | 93.5    | 4.8  | 91.4 | 4.1 | 98.3  | 2.3 |
|            |                 |            | 93.5                   | 4.2  | 87.5 | 4.5  | 96.4  | 1.6  | 93.5    | 4.8  | 91.4 | 4.1 | 98.3  | 2.3 |
|            |                 |            | <b>DJ1081</b>          |      |      |      |       |      |         |      |      |     |       |     |
| w          | UAS-grim;DJ1081 | 04/20/2005 | 95.5                   | 5.4  | 78.4 | 5.8  | 99.4  | 1.7  |         |      |      |     |       |     |
|            |                 | 05/11/2005 | 97.0                   | 2.8  | 91.3 | 3.3  | 96.1  | 3.8  | 94.5    | 3.7  | 93.1 | 3.4 | 97.1  | 3.4 |
|            |                 |            | 96.3                   | 1.1  | 84.9 | 9.1  | 97.7  | 2.4  | 94.5    | 3.7  | 93.1 | 3.4 | 97.1  | 3.4 |
|            |                 |            | <b>DJ1083</b>          |      |      |      |       |      |         |      |      |     |       |     |
| w          | UAS-grim;DJ1083 | 04/20/2005 | 97.0                   | 2.8  | 91.3 | 7.1  | 97.3  | 2.3  |         |      |      |     |       |     |
|            |                 | 05/11/2005 | 84.0                   | 6.0  | 91.6 | 5.2  | 95.2  | 6.1  | 87.5    | 5.4  | 93.3 | 7.0 | 97.0  | 3.5 |
|            |                 |            | 90.5                   | 9.2  | 91.5 | 0.3  | 96.2  | 1.5  | 87.5    | 5.4  | 93.3 | 7.0 | 97.0  | 3.5 |

| Parents                        |                         | Date       | %L1  | SD   | %P   | SD   | %A      | SD   | %L1  | SD   | %P   | SD   | %A    | SD   |
|--------------------------------|-------------------------|------------|------|------|------|------|---------|------|------|------|------|------|-------|------|
| Male                           | Female                  |            | AMP  |      |      |      | AMP/TET |      |      |      |      |      |       |      |
| <b>DJ694 + DJ1077</b>          |                         |            |      |      |      |      |         |      |      |      |      |      |       |      |
| DJ694                          | UAS-grim;DJ1077         | 04/27/2005 | 35.5 | 14.9 | 40.8 | 34.7 | 0.0     | 0.0  | 75.5 | 5.0  | 0.0  | 0.0  | 0.0   | 0.0  |
|                                |                         | 04/11/2006 | 66.0 | 6.0  | 61.3 | 7.5  | 0.0     | 0.0  | 69.5 | 2.8  | 0.0  | 0.0  | 0.0   | 0.0  |
| DJ694;DJ1077                   | UAS-grim                | 05/18/2005 | 59.3 | 9.9  | 64.5 | 10.6 | 0.0     | 0.0  | 52.0 | 8.6  | 0.8  | 2.2  | 12.5  | 35.4 |
|                                |                         | 01/26/2006 | 79.5 | 3.8  | 46.5 | 3.4  | 1.1     | 1.6  | 39.5 | 4.5  | 0.0  | 0.0  | 0.0   | 0.0  |
|                                |                         | 05/25/2005 | 89.0 | 6.0  | 86.8 | 7.8  | 8.8     | 6.5  | 93.5 | 3.7  | 3.3  | 3.1  | 0.0   | 0.0  |
|                                |                         |            | 65.9 | 20.5 | 60.0 | 18.0 | 2.0     | 3.8  | 66.0 | 21.0 | 0.8  | 1.4  | 2.5   | 5.6  |
| <b>DJ694 + DJ1078</b>          |                         |            |      |      |      |      |         |      |      |      |      |      |       |      |
| DJ694                          | UAS-grim;DJ1078         | 04/27/2005 | 37.5 | 6.7  | 18.7 | 17.0 | 0.0     | 0.0  | 64.5 | 9.7  | 5.3  | 6.8  | 0.0   | 0.0  |
|                                |                         | 05/18/2005 | 69.5 | 9.5  | 43.1 | 4.6  | 0.0     | 0.0  | 78.7 | 7.3  | 7.1  | 7.8  | 44.8  | 43.4 |
| DJ694;DJ1078                   | UAS-grim                | 05/25/2005 | 82.5 | 6.0  | 70.4 | 14.3 | 5.0     | 8.4  | 90.0 | 6.8  | 2.8  | 2.4  | 0.0   | 0.0  |
|                                |                         |            | 63.2 | 23.2 | 44.0 | 25.8 | 1.7     | 2.9  | 77.7 | 12.8 | 5.1  | 2.1  | 14.9  | 25.9 |
| <b>DJ694 + DJ1079</b>          |                         |            |      |      |      |      |         |      |      |      |      |      |       |      |
| DJ694                          | UAS-grim;DJ1079         | 04/27/2005 | 51.5 | 9.7  | 2.5  | 7.1  | 0.0     | 0.0  | 77.5 | 10.5 | 0.0  | 0.0  | 0.0   | 0.0  |
|                                |                         | 05/18/2005 | 70.5 | 4.2  | 6.6  | 6.2  | 0.0     | 0.0  | 69.0 | 6.7  | 0.0  | 0.0  | 0.0   | 0.0  |
| DJ694;DJ1079                   | UAS-grim                | 05/25/2005 | 91.5 | 6.2  | 85.4 | 8.0  | 0.0     | 0.0  | 95.0 | 4.7  | 5.7  | 4.4  | 0.0   | 0.0  |
|                                |                         |            | 71.2 | 20.0 | 31.5 | 46.7 | 0.0     | 0.0  | 80.5 | 13.3 | 1.9  | 3.3  | 0.0   | 0.0  |
| <b>DJ694 + DJ1080</b>          |                         |            |      |      |      |      |         |      |      |      |      |      |       |      |
| DJ694                          | UAS-grim;DJ1080         | 05/04/2005 | 73.5 | 7.7  | 17.0 | 11.5 | 0.0     | 0.0  | 74.0 | 11.7 | 0.0  | 0.0  | 0.0   | 0.0  |
|                                |                         | 05/18/2005 | 71.5 | 10.8 | 46.0 | 14.7 | 0.0     | 0.0  | 65.0 | 10.2 | 0.0  | 0.0  | 0.0   | 0.0  |
| DJ694;DJ1080                   | UAS-grim                | 05/25/2005 | 89.5 | 6.4  | 70.2 | 10.4 | 0.0     | 0.0  | 87.5 | 4.5  | 0.6  | 1.6  | 0.0   | 0.0  |
|                                |                         |            | 78.2 | 9.9  | 44.4 | 26.6 | 0.0     | 0.0  | 75.5 | 11.3 | 0.2  | 0.3  | 0.0   | 0.0  |
| <b>DJ694 + DJ1081</b>          |                         |            |      |      |      |      |         |      |      |      |      |      |       |      |
| DJ694                          | UAS-grim;DJ1081         | 05/04/2005 | 75.5 | 8.9  | 20.1 | 6.9  | 72.5    | 25.5 | 74.0 | 6.0  | 12.3 | 4.1  | 100.0 | 0.0  |
|                                |                         | 05/18/2005 | 45.5 | 9.1  | 31.5 | 18.1 | 35.8    | 26.1 | 47.5 | 11.0 | 7.3  | 8.0  | 62.5  | 51.8 |
|                                |                         |            | 60.5 | 21.2 | 25.8 | 8.1  | 54.2    | 25.9 | 60.8 | 18.7 | 9.8  | 3.5  | 81.3  | 26.5 |
| <b>DJ694 + DJ1083</b>          |                         |            |      |      |      |      |         |      |      |      |      |      |       |      |
| DJ694                          | UAS-grim;DJ1083         | 05/04/2005 | 76.0 | 6.8  | 15.7 | 12.5 | 0.0     | 0.0  | 71.5 | 11.4 | 0.0  | 0.0  | 0.0   | 0.0  |
|                                |                         | 05/18/2005 | 76.5 | 7.2  | 69.2 | 11.1 | 0.0     | 0.0  | 80.5 | 9.4  | 0.0  | 0.0  | 0.0   | 0.0  |
|                                |                         |            | 76.3 | 0.4  | 42.5 | 37.8 | 0.0     | 0.0  | 76.0 | 6.4  | 0.0  | 0.0  | 0.0   | 0.0  |
| <b>DJ694 + 2 copies DJ1077</b> |                         |            |      |      |      |      |         |      |      |      |      |      |       |      |
| DJ694;DJ1077                   | UAS-grim;DJ1077         | 06/01/2005 | 90.5 | 7.1  | 74.7 | 6.2  | 0.0     | 0.0  | 83.5 | 8.1  | 75.7 | 8.4  | 0.0   | 0.0  |
|                                |                         | 04/11/2006 | 78.5 | 4.5  | 79.4 | 6.4  | 78.8    | 5.4  | 84.0 | 4.0  | 66.7 | 3.7  | 0.0   | 0.0  |
|                                |                         | 01/26/2006 | 85.0 | 4.2  | 58.3 | 6.2  | 49.9    | 10.7 | 13.0 | 3.5  | 0.0  | 0.0  | 0.0   | 0.0  |
|                                |                         |            | 84.7 | 6.0  | 70.8 | 11.1 | 42.9    | 39.9 | 60.2 | 40.8 | 47.4 | 41.3 | 0.0   | 0.0  |
| <b>DJ694 + DJ1077 + DJ1078</b> |                         |            |      |      |      |      |         |      |      |      |      |      |       |      |
| DJ694;DJ1078                   | UAS-grim;DJ1077         | 06/01/2005 | 98.5 | 2.1  | 69.1 | 9.9  | 0.9     | 2.5  | 97.0 | 3.5  | 54.5 | 16.0 | 0.0   | 0.0  |
| DJ694;DJ1077                   | UAS-grim;DJ1078         | 06/01/2005 | 93.5 | 6.4  | 75.7 | 16.7 | 0.0     | 0.0  | 88.0 | 5.7  | 58.4 | 11.2 | 0.0   | 0.0  |
|                                |                         |            | 96.0 | 3.5  | 72.4 | 4.6  | 0.5     | 0.6  | 92.5 | 6.4  | 56.5 | 2.8  | 0.0   | 0.0  |
| <b>DJ694 + 2 copies DJ1078</b> |                         |            |      |      |      |      |         |      |      |      |      |      |       |      |
| DJ694;DJ1078                   | UAS-grim;DJ1078         | 06/01/2005 | 97.5 | 4.8  | 67.9 | 11.0 | 0.0     | 0.0  | 89.0 | 6.3  | 12.1 | 9.9  | 0.0   | 0.0  |
|                                |                         |            | 97.5 | 4.8  | 67.9 | 11.0 | 0.0     | 0.0  | 89.0 | 6.3  | 12.1 | 9.9  | 0.0   | 0.0  |
| <b>DJ694 + DJ1077 + DJ1079</b> |                         |            |      |      |      |      |         |      |      |      |      |      |       |      |
| DJ694;DJ1077                   | UAS-grim;DJ1079         | 06/08/2005 | 95.5 | 2.6  | 46.3 | 26.3 | 0.0     | 0.0  | 89.0 | 6.0  | 4.2  | 6.8  | 0.0   | 0.0  |
| DJ694;DJ1079                   | UAS-grim;DJ1077         | 06/15/2005 | 98.5 | 3.0  | 77.2 | 5.5  | 0.0     | 0.0  | 98.0 | 3.0  | 67.3 | 11.9 | 0.0   | 0.0  |
|                                |                         | 04/11/2006 | 75.5 | 4.9  | 80.1 | 8.4  | 77.6    | 5.9  | 81.5 | 3.5  | 76.4 | 6.6  | 0.0   | 0.0  |
|                                |                         |            | 89.8 | 12.5 | 67.9 | 18.7 | 25.9    | 44.8 | 89.5 | 8.3  | 49.3 | 39.3 | 0.0   | 0.0  |
| <b>DJ694 + DJ1078 + DJ1079</b> |                         |            |      |      |      |      |         |      |      |      |      |      |       |      |
| DJ694;DJ1078                   | UAS-grim;DJ1079         | 06/08/2005 | 89.0 | 4.1  | 26.0 | 22.0 | 0.0     | 0.0  | 84.5 | 5.0  | 0.6  | 1.7  | 0.0   | 0.0  |
| DJ694;DJ1079                   | UAS-grim;DJ1078         | 06/15/2005 | 97.5 | 3.7  | 69.0 | 13.1 | 0.0     | 0.0  | 98.0 | 2.1  | 43.0 | 15.2 | 0.0   | 0.0  |
|                                |                         |            | 93.3 | 6.0  | 47.5 | 30.4 | 0.0     | 0.0  | 91.3 | 9.5  | 21.8 | 30.0 | 0.0   | 0.0  |
| <b>DJ694 + DJ1077 + DJ1080</b> |                         |            |      |      |      |      |         |      |      |      |      |      |       |      |
| DJ694;DJ1077                   | UAS-grim;DJ1080         | 06/08/2005 | 97.5 | 3.0  | 75.0 | 7.1  | 0.0     | 0.0  | 90.0 | 8.0  | 25.0 | 8.6  | 0.0   | 0.0  |
| DJ694;DJ1080                   | UAS-grim;DJ1077         | 06/15/2005 | 97.0 | 3.5  | 71.9 | 8.7  | 0.0     | 0.0  | 91.5 | 4.0  | 58.5 | 11.4 | 0.0   | 0.0  |
|                                |                         | 04/11/2006 | 92.0 | 1.9  | 68.5 | 3.0  | 52.6    | 6.3  | 91.5 | 3.6  | 22.8 | 2.8  | 0.0   | 0.0  |
| UAS-grim;DJ1077                | DJ694;DJ1080            | 01/26/2006 | 93.5 | 2.4  | 73.6 | 6.7  | 25.2    | 9.5  | 89.0 | 2.3  | 57.8 | 3.3  | 0.0   | 0.0  |
| UAS-grim;DJ1080                | DJ694;DJ1077            | 01/26/2006 | 40.0 | 2.6  | 32.8 | 4.2  | 27.5    | 18.8 | 65.5 | 5.3  | 49.5 | 3.0  | 0.0   | 0.0  |
| DJ694                          | UAS-grim; DJ1077+DJ1080 | 05/30/2006 | 69.0 | 2.6  | 55.4 | 6.2  | 0.0     | 0.0  | 69.0 | 5.8  | 0.0  | 0.0  | 0.0   | 0.0  |
|                                |                         |            | 81.5 | 22.9 | 62.9 | 16.3 | 17.6    | 21.5 | 82.8 | 12.1 | 35.6 | 23.5 | 0.0   | 0.0  |

| Parents                 |                        | Date       | %L1                            | SD   | %P   | SD   | %A    | SD   | %L1     | SD   | %P   | SD   | %A    | SD   |
|-------------------------|------------------------|------------|--------------------------------|------|------|------|-------|------|---------|------|------|------|-------|------|
| Male                    | Female                 |            | AMP                            |      |      |      |       |      | AMP/TET |      |      |      |       |      |
|                         |                        |            | <b>DJ694 + DJ1078 + DJ1080</b> |      |      |      |       |      |         |      |      |      |       |      |
| DJ694;DJ1078            | UAS-grim;DJ1080        | 06/08/2005 | 98.5                           | 2.1  | 75.3 | 14.0 | 0.0   | 0.0  | 88.5    | 9.2  | 3.9  | 4.7  | 0.0   | 0.0  |
| DJ694;DJ1080            | UAS-grim;DJ1078        | 06/15/2005 | 95.5                           | 5.4  | 58.8 | 13.8 | 0.0   | 0.0  | 93.0    | 5.6  | 28.0 | 11.5 | 0.0   | 0.0  |
|                         |                        |            | 97.0                           | 2.1  | 67.0 | 11.6 | 0.0   | 0.0  | 90.8    | 3.2  | 16.0 | 17.0 | 0.0   | 0.0  |
|                         |                        |            | <b>DJ694 + DJ1077 + DJ1081</b> |      |      |      |       |      |         |      |      |      |       |      |
| DJ694;DJ1077            | UAS-grim;DJ1081        | 06/15/2005 | 87.5                           | 5.4  | 42.7 | 17.8 | 79.1  | 15.5 | 89.5    | 5.2  | 31.9 | 8.6  | 98.4  | 4.4  |
|                         |                        |            | 87.5                           | 5.4  | 42.7 | 17.8 | 79.1  | 15.5 | 89.5    | 5.2  | 31.9 | 8.6  | 98.4  | 4.4  |
|                         |                        |            | <b>DJ694 + DJ1078 + DJ1081</b> |      |      |      |       |      |         |      |      |      |       |      |
| DJ694;DJ1078            | UAS-grim;DJ1081        | 06/15/2005 | 94.0                           | 3.0  | 44.2 | 15.1 | 49.1  | 10.7 | 92.5    | 6.2  | 13.6 | 4.8  | 83.4  | 25.2 |
|                         |                        |            | 94.0                           | 3.0  | 44.2 | 15.1 | 49.1  | 10.7 | 92.5    | 6.2  | 13.6 | 4.8  | 83.4  | 25.2 |
|                         |                        |            | <b>DJ694 + DJ1077 + DJ1083</b> |      |      |      |       |      |         |      |      |      |       |      |
| DJ694;DJ1077            | UAS-grim;DJ1083        | 06/15/2005 | 94.0                           | 3.7  | 72.5 | 9.4  | 0.0   | 0.0  | 92.0    | 4.3  | 1.1  | 2.0  | 0.0   | 0.0  |
| UAS-grim;DJ1083         | DJ694;DJ1077           | 01/26/2006 | 57.0                           | 6.7  | 71.2 | 9.3  | 6.2   | 4.4  | 55.5    | 3.1  | 1.1  | 1.6  | 0.0   | 0.0  |
| DJ694                   | UAS-grim;DJ1077+DJ1083 | 04/25/2006 | 28.0                           | 10.4 | 21.6 | 7.1  | 4.2   | 5.9  | 28.0    | 4.8  | 0.0  | 0.0  | 0.0   | 0.0  |
|                         |                        |            | 45.0                           | 7.8  | 17.0 | 6.1  | 37.5  | 25.9 | 74.5    | 8.7  | 5.1  | 2.2  | 0.0   | 0.0  |
|                         |                        |            | 56.0                           | 28.0 | 45.6 | 30.4 | 12.0  | 17.2 | 62.5    | 27.4 | 1.8  | 2.2  | 0.0   | 0.0  |
|                         |                        |            | <b>DJ694 + DJ1078 + DJ1083</b> |      |      |      |       |      |         |      |      |      |       |      |
| DJ694;DJ1078            | UAS-grim;DJ1083        | 06/15/2005 | 87.5                           | 5.8  | 47.5 | 23.5 | 0.0   | 0.0  | 91.0    | 6.3  | 0.0  | 0.0  | 0.0   | 0.0  |
|                         |                        |            | 87.5                           | 5.8  | 47.5 | 23.5 | 0.0   | 0.0  | 91.0    | 6.3  | 0.0  | 0.0  | 0.0   | 0.0  |
|                         |                        |            | <b>DJ694 + 2 copies DJ1079</b> |      |      |      |       |      |         |      |      |      |       |      |
| DJ694;DJ1079            | UAS-grim;DJ1079        | 06/01/2005 | 87.0                           | 6.0  | 78.8 | 10.0 | 0.0   | 0.0  | 92.0    | 5.7  | 21.4 | 13.2 | 0.0   | 0.0  |
|                         |                        |            | 87.0                           | 6.0  | 78.8 | 10.0 | 0.0   | 0.0  | 92.0    | 5.7  | 21.4 | 13.2 | 0.0   | 0.0  |
|                         |                        |            | <b>DJ694 + DJ1079 + DJ1080</b> |      |      |      |       |      |         |      |      |      |       |      |
| DJ694;DJ1080            | UAS-grim;DJ1079        | 06/01/2005 | 93.5                           | 4.2  | 84.4 | 7.6  | 0.0   | 0.0  | 85.0    | 6.0  | 61.5 | 8.8  | 0.0   | 0.0  |
| DJ694;DJ1079            | UAS-grim;DJ1080        | 06/01/2005 | 94.0                           | 6.8  | 60.6 | 7.5  | 0.0   | 0.0  | 91.0    | 5.6  | 3.3  | 3.8  | 0.0   | 0.0  |
| DJ694                   | UAS-grim;DJ1079+DJ1080 | 05/02/2006 | 88.0                           | 3.9  | 64.9 | 10.6 | 41.8  | 6.8  | 72.0    | 2.6  | 27.1 | 5.8  | 100.0 | 0.0  |
|                         |                        |            | 91.8                           | 3.3  | 70.0 | 12.7 | 13.9  | 24.1 | 82.7    | 9.7  | 30.6 | 29.2 | 33.3  | 57.7 |
|                         |                        |            | <b>DJ694 + 2 copies DJ1080</b> |      |      |      |       |      |         |      |      |      |       |      |
| DJ694;DJ1080            | UAS-grim;DJ1080        | 06/01/2005 | 91.0                           | 4.1  | 81.3 | 3.4  | 0.0   | 0.0  | 86.0    | 9.8  | 23.0 | 14.5 | 0.0   | 0.0  |
| UAS-grim;DJ1080         | DJ694;DJ1080           | 01/26/2006 | 83.0                           | 4.9  | 74.9 | 8.7  | 6.6   | 3.1  | 85.0    | 2.6  | 25.8 | 6.0  | 0.0   | 0.0  |
|                         |                        |            | 87.0                           | 5.7  | 78.1 | 4.6  | 3.3   | 4.6  | 85.5    | 0.7  | 24.4 | 2.0  | 0.0   | 0.0  |
|                         |                        |            | <b>DJ694 + DJ1079 + DJ1081</b> |      |      |      |       |      |         |      |      |      |       |      |
| DJ694;DJ1079            | UAS-grim;DJ1081        | 06/08/2005 | 93.0                           | 6.0  | 69.9 | 11.7 | 43.6  | 20.2 | 95.0    | 2.8  | 29.0 | 9.4  | 85.6  | 20.9 |
|                         |                        |            | 93.0                           | 6.0  | 69.9 | 11.7 | 43.6  | 20.2 | 95.0    | 2.8  | 29.0 | 9.4  | 85.6  | 20.9 |
|                         |                        |            | <b>DJ694 + DJ1080 + DJ1081</b> |      |      |      |       |      |         |      |      |      |       |      |
| DJ694;DJ1080            | UAS-grim;DJ1081        | 06/08/2005 | 85.0                           | 11.5 | 32.5 | 16.7 | 60.3  | 29.0 | 95.0    | 4.7  | 31.9 | 11.3 | 100.0 | 0.0  |
|                         |                        |            | 85.0                           | 11.5 | 32.5 | 16.7 | 60.3  | 29.0 | 95.0    | 4.7  | 31.9 | 11.3 | 100.0 | 0.0  |
|                         |                        |            | <b>DJ694 + DJ1079 + DJ1083</b> |      |      |      |       |      |         |      |      |      |       |      |
| DJ694;DJ1079            | UAS-grim;DJ1083        | 06/08/2005 | 93.0                           | 5.1  | 69.8 | 10.4 | 0.0   | 0.0  | 92.0    | 6.4  | 3.6  | 7.3  | 0.0   | 0.0  |
|                         |                        |            | 93.0                           | 5.1  | 69.8 | 10.4 | 0.0   | 0.0  | 92.0    | 6.4  | 3.6  | 7.3  | 0.0   | 0.0  |
|                         |                        |            | <b>DJ694 + DJ1080 + DJ1083</b> |      |      |      |       |      |         |      |      |      |       |      |
| DJ694;DJ1080            | UAS-grim;DJ1083        | 06/08/2005 | 82.5                           | 4.2  | 50.8 | 20.2 | 0.0   | 0.0  | 93.5    | 5.2  | 0.0  | 0.0  | 0.0   | 0.0  |
| UAS-grim;DJ1083         | DJ694;DJ1080           | 01/26/2006 | 12.0                           | 2.8  | 0.0  | 0.0  | 0.0   | 0.0  | 36.0    | 8.8  | 0.0  | 0.0  | 0.0   | 0.0  |
| DJ694                   | UAS-grim;DJ1080+DJ1083 | 05/02/2006 | 56.5                           | 7.8  | 60.9 | 10.0 | 0.0   | 0.0  | 54.0    | 6.9  | 0.0  | 0.0  | 0.0   | 0.0  |
|                         |                        |            | 62.0                           | 8.4  | 65.2 | 6.1  | 7.5   | 3.5  | 77.5    | 7.6  | 0.0  | 0.0  | 0.0   | 0.0  |
|                         |                        |            | 53.3                           | 29.7 | 44.2 | 30.1 | 1.9   | 3.7  | 65.3    | 25.4 | 0.0  | 0.0  | 0.0   | 0.0  |
|                         |                        |            | <b>DJ1077 + DJ1080</b>         |      |      |      |       |      |         |      |      |      |       |      |
| UAS-grim; DJ1077+DJ1080 | w                      | 04/19/2006 | 87.0                           | 1.8  | 90.2 | 4.1  | 100.0 | 0.0  | 82.5    | 5.0  | 94.9 | 0.1  | 100.0 | 0.0  |
|                         |                        | 05/24/2006 | 99.0                           | 0.9  | 74.1 | 7.2  | 99.4  | 0.9  | 86.0    | 5.3  | 79.8 | 0.6  | 99.3  | 2.1  |
| DJ694; DJ1077+DJ1080    | w                      | 04/19/2006 | 87.0                           | 2.6  | 82.4 | 5.2  | 99.4  | 0.9  | 84.0    | 4.0  | 84.4 | 3.6  | 98.7  | 1.3  |
|                         |                        | 05/24/2006 | 93.0                           | 2.8  | 90.3 | 2.3  | 98.2  | 1.3  | 93.0    | 2.3  | 96.8 | 1.0  | 99.4  | 0.8  |
|                         |                        |            | 91.5                           | 5.7  | 84.3 | 7.7  | 99.2  | 0.8  | 86.4    | 4.6  | 89.0 | 8.2  | 99.3  | 0.6  |
|                         |                        |            | <b>DJ1077 + DJ1083</b>         |      |      |      |       |      |         |      |      |      |       |      |
| UAS-grim;DJ1077+DJ1083  | w                      | 04/19/2006 | 89.0                           | 3.5  | 90.7 | 4.1  | 98.9  | 1.6  | 89.0    | 3.7  | 94.5 | 2.7  | 98.9  | 1.0  |
|                         |                        | 05/24/2006 | 96.5                           | 1.7  | 76.1 | 4.8  | 99.4  | 0.8  | 92.0    | 3.4  | 86.2 | 4.8  | 98.2  | 1.3  |
| DJ694;DJ1077+DJ1083     | w                      | 04/19/2006 | 92.5                           | 2.0  | 90.9 | 1.3  | 100.0 | 0.0  | 90.5    | 3.4  | 95.4 | 2.2  | 99.5  | 0.7  |
|                         |                        | 05/24/2006 | 94.0                           | 1.9  | 96.3 | 1.8  | 97.3  | 1.1  | 95.5    | 1.7  | 95.3 | 2.1  | 97.3  | 1.6  |
|                         |                        |            | 93.0                           | 3.1  | 88.5 | 8.6  | 98.9  | 1.2  | 91.8    | 2.8  | 92.9 | 4.5  | 98.5  | 0.9  |



| Parents                                          |                         | Date       | %L1  | SD   | %P   | SD   | %A    | SD   | %L1     | SD   | %P   | SD   | %A   | SD   |
|--------------------------------------------------|-------------------------|------------|------|------|------|------|-------|------|---------|------|------|------|------|------|
| Male                                             | Female                  |            | AMP  |      |      |      |       |      | AMP/TET |      |      |      |      |      |
| <b>DJ1080 + DJ1083</b>                           |                         |            |      |      |      |      |       |      |         |      |      |      |      |      |
| UAS-grim;DJ1080+DJ1083                           | w                       | 05/24/2006 | 94.0 | 3.4  | 53.0 | 6.5  | 100.0 | 0.0  | 88.5    | 2.3  | 59.5 | 3.8  | 97.0 | 3.0  |
| DJ694;DJ1080+DJ1083                              | w                       | 04/19/2006 | 74.5 | 5.3  | 88.2 | 3.9  | 100.0 | 0.0  | 65.0    | 5.2  | 91.4 | 2.0  | 99.2 | 1.2  |
|                                                  |                         | 04/19/2006 | 90.0 | 2.6  | 88.1 | 4.5  | 99.3  | 1.0  | 87.0    | 3.0  | 83.9 | 3.5  | 98.0 | 1.4  |
|                                                  |                         |            | 86.2 | 10.3 | 76.4 | 20.3 | 99.8  | 0.4  | 80.2    | 13.2 | 78.2 | 16.7 | 98.1 | 1.1  |
| <b>DJ1079 + DJ1080</b>                           |                         |            |      |      |      |      |       |      |         |      |      |      |      |      |
| UAS-grim;DJ1079+DJ1080                           | w                       | 04/19/2006 | 88.5 | 4.6  | 92.9 | 1.9  | 99.3  | 1.0  | 92.5    | 2.9  | 88.7 | 2.5  | 98.2 | 1.3  |
|                                                  |                         | 05/24/2006 | 99.5 | 0.7  | 79.9 | 3.5  | 99.4  | 0.9  | 97.5    | 1.0  | 80.6 | 4.9  | 99.5 | 0.7  |
| DJ694;DJ1079+DJ1080                              | w                       | 04/19/2006 | 86.0 | 3.4  | 84.2 | 4.5  | 100.0 | 0.0  | 87.0    | 3.8  | 90.3 | 4.8  | 98.1 | 1.9  |
|                                                  |                         | 05/24/2006 | 91.5 | 2.9  | 93.8 | 3.8  | 96.7  | 3.3  | 96.0    | 1.1  | 94.3 | 3.1  | 98.9 | 1.0  |
|                                                  |                         |            | 91.4 | 5.9  | 87.7 | 6.8  | 98.8  | 1.5  | 93.3    | 4.7  | 88.5 | 5.8  | 98.7 | 0.7  |
| <b>DJ694 + 2 copies DJ1077 + DJ1080</b>          |                         |            |      |      |      |      |       |      |         |      |      |      |      |      |
| DJ694;DJ1077                                     | UAS-grim; DJ1077+DJ1080 | 04/25/2006 | 93.5 | 1.5  | 82.9 | 2.5  | 62.9  | 5.2  | 90.0    | 3.5  | 79.9 | 5.7  | 0.0  | 0.0  |
|                                                  |                         | 05/30/2006 | 79.5 | 4.9  | 74.1 | 5.4  | 20.4  | 8.0  | 92.0    | 1.5  | 56.7 | 9.0  | 0.0  | 0.0  |
|                                                  |                         |            | 86.5 | 9.9  | 78.5 | 6.2  | 41.6  | 30.1 | 91.0    | 1.4  | 68.3 | 16.4 | 0.0  | 0.0  |
| <b>DJ694 + DJ1077 + DJ1079 + DJ1080</b>          |                         |            |      |      |      |      |       |      |         |      |      |      |      |      |
| DJ694;DJ1079                                     | UAS-grim; DJ1077+DJ1080 | 04/25/2006 | 76.0 | 2.1  | 77.2 | 6.1  | 77.4  | 5.4  | 79.5    | 3.6  | 58.3 | 7.4  | 0.0  | 0.0  |
|                                                  |                         | 05/30/2006 | 82.0 | 2.4  | 69.7 | 8.8  | 31.4  | 8.5  | 89.0    | 4.0  | 67.5 | 6.2  | 0.0  | 0.0  |
| DJ694;DJ1077                                     | UAS-grim;DJ1079+DJ1080  | 05/02/2006 | 72.5 | 3.3  | 67.4 | 4.7  | 84.0  | 5.3  | 78.5    | 3.0  | 77.1 | 4.4  | 38.1 | 6.5  |
|                                                  |                         |            | 76.8 | 4.8  | 71.4 | 5.1  | 64.3  | 28.6 | 82.3    | 5.8  | 67.6 | 9.4  | 12.7 | 22.0 |
| <b>DJ694 + DJ1077 + 2 copies DJ1080</b>          |                         |            |      |      |      |      |       |      |         |      |      |      |      |      |
| DJ694;DJ1080                                     | UAS-grim; DJ1077+DJ1080 | 04/25/2006 | 90.5 | 3.2  | 89.8 | 3.5  | 68.4  | 3.8  | 87.0    | 3.2  | 79.6 | 5.2  | 0.0  | 0.0  |
|                                                  |                         | 05/30/2006 | 91.0 | 2.6  | 80.0 | 5.8  | 29.0  | 7.0  | 88.5    | 3.1  | 44.6 | 7.2  | 0.0  | 0.0  |
|                                                  |                         |            | 90.8 | 0.4  | 84.9 | 6.9  | 48.7  | 27.9 | 87.8    | 1.1  | 62.1 | 24.8 | 0.0  | 0.0  |
| <b>DJ694 + 2 copies DJ1077 + DJ1083</b>          |                         |            |      |      |      |      |       |      |         |      |      |      |      |      |
| DJ694;DJ1077                                     | UAS-grim;DJ1077+DJ1083  | 04/25/2006 | 45.5 | 5.3  | 43.7 | 6.5  | 73.8  | 9.1  | 42.0    | 8.6  | 10.8 | 4.6  | 0.0  | 0.0  |
|                                                  |                         | 05/30/2006 | 54.0 | 5.5  | 23.2 | 6.3  | 88.0  | 8.8  | 64.0    | 12.1 | 3.1  | 1.8  | 0.0  | 0.0  |
|                                                  |                         |            | 49.8 | 6.0  | 33.4 | 14.5 | 80.9  | 10.1 | 53.0    | 15.6 | 7.0  | 5.4  | 0.0  | 0.0  |
| <b>DJ694 + DJ1077 + DJ1080 + DJ1083</b>          |                         |            |      |      |      |      |       |      |         |      |      |      |      |      |
| DJ694;DJ1080                                     | UAS-grim;DJ1077+DJ1083  | 04/25/2006 | 43.5 | 6.0  | 57.5 | 8.2  | 74.5  | 6.1  | 48.5    | 5.2  | 19.5 | 7.7  | 0.0  | 0.0  |
| DJ694;DJ1077                                     | UAS-grim;DJ1080+DJ1083  | 05/02/2006 | 89.0 | 2.6  | 86.1 | 4.9  | 59.8  | 7.6  | 78.0    | 4.3  | 80.4 | 6.6  | 0.0  | 0.0  |
| DJ694;DJ1080                                     | UAS-grim;DJ1077+DJ1083  | 05/30/2006 | 42.5 | 22.8 | 12.8 | 7.4  | 14.1  | 11.5 | 42.0    | 10.7 | 1.9  | 2.7  | 6.3  | 8.8  |
|                                                  |                         |            | 58.3 | 26.6 | 52.1 | 36.9 | 49.5  | 31.5 | 56.2    | 19.2 | 33.9 | 41.2 | 2.1  | 3.6  |
| <b>DJ694 + DJ1077 + 2 copies DJ1083</b>          |                         |            |      |      |      |      |       |      |         |      |      |      |      |      |
| DJ694;DJ1083                                     | UAS-grim;DJ1077+DJ1083  | 04/25/2006 | 26.5 | 11.1 | 25.5 | 16.5 | 41.7  | 20.9 | 21.0    | 5.3  | 4.3  | 4.0  | 0.0  | 0.0  |
|                                                  |                         |            | 26.5 | 11.1 | 25.5 | 16.5 | 41.7  | 20.9 | 21.0    | 5.3  | 4.3  | 4.0  | 0.0  | 0.0  |
| <b>DJ694 + DJ1079 + DJ1080 + DJ1083</b>          |                         |            |      |      |      |      |       |      |         |      |      |      |      |      |
| DJ694;DJ1079                                     | UAS-grim;DJ1080+DJ1083  | 05/02/2006 | 82.0 | 4.1  | 90.9 | 3.9  | 60.5  | 5.0  | 84.0    | 1.5  | 83.7 | 6.8  | 0.0  | 0.0  |
|                                                  |                         | 06/06/2006 | 79.0 | 12.2 | 79.3 | 3.7  | 78.4  | 4.0  | 93.0    | 2.1  | 64.2 | 5.2  | 0.0  | 0.0  |
|                                                  |                         |            | 80.5 | 2.1  | 85.1 | 8.2  | 69.4  | 12.6 | 88.5    | 6.4  | 73.9 | 13.8 | 0.0  | 0.0  |
| <b>DJ694 + 2 copies DJ1080 + DJ1083</b>          |                         |            |      |      |      |      |       |      |         |      |      |      |      |      |
| DJ694;DJ1080                                     | UAS-grim;DJ1080+DJ1083  | 05/02/2006 | 80.0 | 4.7  | 78.4 | 4.2  | 43.2  | 6.0  | 80.0    | 3.7  | 71.6 | 3.6  | 0.0  | 0.0  |
|                                                  |                         | 06/06/2006 | 85.5 | 2.6  | 75.7 | 5.1  | 47.4  | 8.5  | 95.0    | 1.8  | 33.8 | 4.1  | 0.0  | 0.0  |
|                                                  |                         |            | 82.8 | 3.9  | 77.0 | 1.9  | 45.3  | 3.0  | 87.5    | 10.6 | 52.7 | 26.7 | 0.0  | 0.0  |
| <b>DJ694 + 2 copies DJ1079 + DJ1080</b>          |                         |            |      |      |      |      |       |      |         |      |      |      |      |      |
| DJ694;DJ1079                                     | UAS-grim;DJ1079+DJ1080  | 05/02/2006 | 49.0 | 20.5 | 56.4 | 23.5 | 56.9  | 23.6 | 34.0    | 19.0 | 29.8 | 16.8 | 23.3 | 13.9 |
|                                                  |                         |            | 49.0 | 20.5 | 56.4 | 23.5 | 56.9  | 23.6 | 34.0    | 19.0 | 29.8 | 16.8 | 23.3 | 13.9 |
| <b>DJ694 + DJ1079 + 2 copies DJ1080</b>          |                         |            |      |      |      |      |       |      |         |      |      |      |      |      |
| DJ694;DJ1080                                     | UAS-grim;DJ1079+DJ1080  | 05/02/2006 | 87.0 | 4.2  | 80.9 | 3.9  | 78.8  | 4.3  | 90.5    | 3.7  | 78.8 | 4.5  | 42.9 | 6.1  |
|                                                  |                         |            | 87.0 | 4.2  | 80.9 | 3.9  | 78.8  | 4.3  | 90.5    | 3.7  | 78.8 | 4.5  | 42.9 | 6.1  |
| <b>DJ694 + DJ1077 + DJ1079 + DJ1083</b>          |                         |            |      |      |      |      |       |      |         |      |      |      |      |      |
| DJ694;DJ1079                                     | UAS-grim;DJ1077+DJ1083  | 05/30/2006 | 82.5 | 4.9  | 38.9 | 5.4  | 75.5  | 5.6  | 79.0    | 5.0  | 9.5  | 3.2  | 6.3  | 8.8  |
|                                                  |                         |            | 82.5 | 4.9  | 38.9 | 5.4  | 75.5  | 5.6  | 79.0    | 5.0  | 9.5  | 3.2  | 6.3  | 8.8  |
| <b>DJ694 + DJ1077 + DJ1079 + 2 copies DJ1080</b> |                         |            |      |      |      |      |       |      |         |      |      |      |      |      |
| DJ694;DJ1079+DJ1080                              | UAS-grim; DJ1077+DJ1080 | 05/09/2006 | 71.0 | 2.6  | 64.7 | 9.4  | 44.5  | 8.4  | 72.5    | 4.7  | 57.8 | 6.1  | 0.0  | 0.0  |
|                                                  |                         | 06/13/2006 | 77.0 | 11.8 | 74.3 | 6.0  | 59.6  | 8.4  | 82.0    | 1.9  | 72.8 | 6.0  | 0.0  | 0.0  |
| DJ694; DJ1077+DJ1080                             | UAS-grim;DJ1079+DJ1080  | 05/09/2006 | 88.5 | 3.6  | 80.7 | 2.5  | 72.6  | 3.6  | 89.0    | 2.8  | 83.9 | 5.6  | 34.9 | 5.3  |
|                                                  |                         |            | 78.8 | 8.9  | 73.2 | 8.1  | 58.9  | 14.1 | 81.2    | 8.3  | 71.5 | 13.1 | 11.6 | 20.2 |
| <b>DJ694 + 2 copies DJ1077 + 2 copies DJ1080</b> |                         |            |      |      |      |      |       |      |         |      |      |      |      |      |
| DJ694; DJ1077+DJ1080                             | UAS-grim; DJ1077+DJ1080 | 05/09/2006 | 89.5 | 1.8  | 84.7 | 4.9  | 53.9  | 7.6  | 91.0    | 3.7  | 63.9 | 4.0  | 0.0  | 0.0  |
|                                                  |                         | 06/13/2006 | 85.5 | 3.5  | 78.1 | 5.8  | 57.4  | 6.9  | 94.0    | 2.4  | 63.5 | 6.5  | 0.0  | 0.0  |
|                                                  |                         |            | 87.5 | 2.8  | 81.4 | 4.7  | 55.7  | 2.5  | 92.5    | 0.9  | 63.7 | 0.3  | 0.0  | 0.0  |



| Parents                                          |                         | Date       | %L1  | SD   | %P   | SD   | %A   | SD   | %L1     | SD   | %P   | SD   | %A   | SD   |
|--------------------------------------------------|-------------------------|------------|------|------|------|------|------|------|---------|------|------|------|------|------|
| Male                                             | Female                  |            | AMP  |      |      |      |      |      | AMP/TET |      |      |      |      |      |
| <b>DJ694 + 2 copies DJ1077 + DJ1080 + DJ1083</b> |                         |            |      |      |      |      |      |      |         |      |      |      |      |      |
| DJ694;DJ1077+DJ1083                              | UAS-grim; DJ1077+DJ1080 | 05/09/2006 | 91.0 | 1.4  | 78.6 | 3.5  | 55.7 | 6.8  | 87.5    | 3.3  | 55.4 | 6.2  | 36.6 | 8.5  |
|                                                  |                         | 06/13/2006 | 93.5 | 2.4  | 82.9 | 4.7  | 80.4 | 4.6  | 94.0    | 2.6  | 68.2 | 6.4  | 78.9 | 5.3  |
| DJ694; DJ1077+DJ1080                             | UAS-grim;DJ1077+DJ1083  | 05/16/2006 | 56.5 | 7.4  | 24.8 | 8.0  | 15.3 | 6.5  | 26.0    | 13.0 | 2.8  | 3.0  | 0.0  | 0.0  |
|                                                  |                         | 06/06/2006 | 98.0 | 1.1  | 59.8 | 4.8  | 76.8 | 4.8  | 81.5    | 6.0  | 8.3  | 1.0  | 0.0  | 0.0  |
|                                                  |                         |            | 77.3 | 29.3 | 42.3 | 24.7 | 46.0 | 43.5 | 53.8    | 39.2 | 5.6  | 3.9  | 0.0  | 0.0  |
| <b>DJ694 + DJ1077 + 2 copies DJ1080 + DJ1083</b> |                         |            |      |      |      |      |      |      |         |      |      |      |      |      |
| DJ694;DJ1080+DJ1083                              | UAS-grim; DJ1077+DJ1080 | 05/09/2006 | 91.0 | 2.6  | 77.1 | 9.2  | 25.3 | 7.4  | 92.0    | 2.8  | 9.8  | 3.8  | 0.0  | 0.0  |
|                                                  |                         | 06/13/2006 | 88.0 | 2.6  | 65.4 | 5.6  | 34.3 | 5.2  | 89.0    | 3.0  | 11.5 | 3.5  | 0.0  | 0.0  |
| DJ694; DJ1077+DJ1080                             | UAS-grim;DJ1080+DJ1083  | 05/16/2006 | 94.5 | 1.8  | 86.8 | 3.1  | 73.7 | 4.7  | 95.0    | 2.1  | 57.1 | 6.0  | 0.0  | 0.0  |
|                                                  |                         |            | 91.2 | 3.3  | 76.4 | 10.7 | 44.4 | 25.8 | 92.0    | 3.0  | 26.1 | 26.8 | 0.0  | 0.0  |
| <b>DJ694 + 2 copies DJ1079 + 2 copies DJ1080</b> |                         |            |      |      |      |      |      |      |         |      |      |      |      |      |
| DJ694;DJ1079+DJ1080                              | UAS-grim;DJ1079+DJ1080  | 05/09/2006 | 83.5 | 3.6  | 83.1 | 5.3  | 84.7 | 5.3  | 78.0    | 2.1  | 92.5 | 1.4  | 38.2 | 10.3 |
|                                                  |                         |            | 83.5 | 3.6  | 83.1 | 5.3  | 84.7 | 5.3  | 78.0    | 2.1  | 92.5 | 1.4  | 38.2 | 10.3 |
| <b>DJ694 + DJ1077 + DJ1079 + DJ1080 + DJ1083</b> |                         |            |      |      |      |      |      |      |         |      |      |      |      |      |
| DJ694;DJ1077+DJ1083                              | UAS-grim;DJ1079+DJ1080  | 05/09/2006 | 89.5 | 3.4  | 88.9 | 3.4  | 81.7 | 4.0  | 92.0    | 2.6  | 77.8 | 3.9  | 81.0 | 6.7  |
|                                                  |                         | 05/16/2006 | 63.5 | 9.8  | 24.7 | 8.1  | 15.9 | 11.8 | 75.5    | 9.6  | 2.8  | 2.0  | 0.0  | 0.0  |
| DJ694;DJ1079+DJ1080                              | UAS-grim;DJ1077+DJ1083  | 06/06/2006 | 66.0 | 9.4  | 24.3 | 5.1  | 43.5 | 14.1 | 53.5    | 6.3  | 0.0  | 0.0  | 0.0  | 0.0  |
|                                                  |                         |            | 64.8 | 1.8  | 24.5 | 0.2  | 29.7 | 19.5 | 64.5    | 15.6 | 1.4  | 2.0  | 0.0  | 0.0  |
| <b>DJ694 + DJ1079 + 2 copies DJ1080 + DJ1083</b> |                         |            |      |      |      |      |      |      |         |      |      |      |      |      |
| DJ694;DJ1080+DJ1083                              | UAS-grim;DJ1079+DJ1080  | 05/09/2006 | 95.5 | 1.7  | 82.2 | 5.6  | 51.6 | 3.0  | 92.0    | 3.4  | 56.6 | 5.7  | 54.0 | 6.7  |
|                                                  |                         | 05/16/2006 | 92.0 | 2.4  | 79.3 | 7.4  | 67.7 | 7.3  | 86.5    | 3.8  | 66.6 | 7.7  | 0.0  | 0.0  |
| DJ694;DJ1079+DJ1080                              | UAS-grim;DJ1080+DJ1083  | 06/20/2006 | 75.0 | 11.6 | 59.3 | 10.4 | 20.1 | 5.5  | 92.5    | 1.3  | 53.7 | 9.2  | 0.0  | 0.0  |
|                                                  |                         |            | 83.5 | 12.0 | 69.3 | 14.1 | 43.9 | 33.6 | 89.5    | 4.2  | 60.2 | 9.1  | 0.0  | 0.0  |
| <b>DJ694 + DJ1077 + DJ1080 + 2 copies DJ1083</b> |                         |            |      |      |      |      |      |      |         |      |      |      |      |      |
| DJ694;DJ1077+DJ1083                              | UAS-grim;DJ1080+DJ1083  | 05/16/2006 | 93.0 | 1.8  | 80.5 | 4.6  | 75.1 | 4.6  | 88.5    | 3.6  | 58.5 | 7.6  | 45.5 | 13.0 |
|                                                  |                         | 06/20/2006 | 93.5 | 2.4  | 76.0 | 4.4  | 59.9 | 5.9  | 96.0    | 2.1  | 48.9 | 4.3  | 65.6 | 8.2  |
| DJ694;DJ1080+DJ1083                              | UAS-grim;DJ1077+DJ1083  | 05/16/2006 | 44.0 | 5.8  | 21.7 | 6.8  | 22.9 | 13.3 | 33.5    | 4.8  | 7.0  | 9.8  | 2.5  | 3.5  |
|                                                  |                         | 06/06/2006 | 82.0 | 4.5  | 39.8 | 8.1  | 24.6 | 11.8 | 83.5    | 3.9  | 0.0  | 0.0  | 0.0  | 0.0  |
|                                                  |                         |            | 78.1 | 23.4 | 54.5 | 28.4 | 45.7 | 26.0 | 75.4    | 28.4 | 28.6 | 29.4 | 28.4 | 32.4 |
| <b>DJ694 + 2 copies DJ1080 + 2 copies DJ1083</b> |                         |            |      |      |      |      |      |      |         |      |      |      |      |      |
| DJ694;DJ1080+DJ1083                              | UAS-grim;DJ1080+DJ1083  | 05/16/2006 | 94.0 | 2.4  | 69.7 | 4.8  | 44.6 | 6.4  | 86.0    | 4.0  | 22.4 | 3.4  | 0.0  | 0.0  |
|                                                  |                         | 06/20/2006 | 61.5 | 12.9 | 62.8 | 6.5  | 27.3 | 7.6  | 89.0    | 2.6  | 17.5 | 3.0  | 0.0  | 0.0  |
|                                                  |                         |            | 77.8 | 23.0 | 66.3 | 4.9  | 35.9 | 12.2 | 87.5    | 2.1  | 19.9 | 3.5  | 0.0  | 0.0  |

| Parents            |              | Date       | %L1  | SD   | %P    | SD   | %A    | SD      | %L1   | SD   | %P    | SD   | %A    | SD  |
|--------------------|--------------|------------|------|------|-------|------|-------|---------|-------|------|-------|------|-------|-----|
| Male               | Female       |            | AMP  |      |       |      |       | AMP/TET |       |      |       |      |       |     |
| <b>0 GAL80</b>     |              |            |      |      |       |      |       |         |       |      |       |      |       |     |
| w                  | UAS-grim     | 04/13/2005 | 95.0 | 3.5  | 88.4  | 8.1  | 97.3  | 4.1     |       |      |       |      |       |     |
| w                  | UAS-grim     | 04/20/2005 | 95.5 | 3.3  | 81.2  | 4.4  | 96.1  | 3.6     |       |      |       |      |       |     |
| w                  | UAS-grim     | 04/27/2005 | 98.5 | 2.1  | 79.8  | 7.6  | 93.1  | 4.5     | 97.5  | 3.0  | 83.2  | 9.0  | 96.8  | 2.7 |
| w                  | UAS-grim     | 05/04/2005 | 97.0 | 1.9  | 83.5  | 5.4  | 96.9  | 2.6     | 93.0  | 5.6  | 86.3  | 7.4  | 97.0  | 2.5 |
| w                  | UAS-grim     | 05/11/2005 | 93.0 | 4.7  | 83.3  | 5.3  | 98.0  | 2.7     | 93.5  | 5.6  | 89.9  | 6.8  | 96.3  | 4.3 |
| w                  | UAS-grim     | 05/11/2005 | 92.0 | 4.6  | 85.9  | 4.3  | 96.1  | 2.6     | 90.0  | 5.2  | 89.0  | 5.8  | 92.6  | 2.5 |
| w                  | UAS-grim     | 05/18/2005 | 99.0 | 2.0  | 89.9  | 2.2  | 97.8  | 2.5     | 94.0  | 50.3 | 96.9  | 4.0  | 99.0  | 2.1 |
| w                  | UAS-grim     | 04/11/2006 | 88.0 | 10.0 | 85.0  | 8.9  | 97.2  | 3.0     | 89.0  | 6.0  | 85.5  | 5.8  | 99.4  | 1.8 |
| UAS-grim           | w            | 01/26/2006 | 74.5 | 4.9  | 88.0  | 6.5  | 99.4  | 0.9     | 72.0  | 3.0  | 70.3  | 4.3  | 97.5  | 2.4 |
| w                  | UAS-grim     | 04/19/2006 | 90.5 | 5.6  | 87.8  | 5.3  | 98.7  | 2.4     | 93.5  | 8.3  | 82.8  | 10.8 | 98.3  | 3.4 |
| w                  | UAS-grim     | 04/25/2006 | 96.0 | 4.3  | 86.5  | 6.9  | 98.9  | 2.0     | 94.5  | 3.0  | 91.5  | 5.1  | 98.3  | 2.3 |
| w                  | UAS-grim     | 05/02/2006 | 99.0 | 1.9  | 90.4  | 5.2  | 99.5  | 1.5     | 97.0  | 4.1  | 90.8  | 5.1  | 98.3  | 2.4 |
| w                  | UAS-grim     | 05/09/2006 | 95.0 | 5.1  | 89.1  | 6.9  | 98.1  | 2.6     | 96.5  | 4.5  | 91.0  | 7.0  | 100.0 | 0.0 |
| w                  | UAS-grim     | 05/16/2006 | 92.5 | 10.4 | 84.5  | 11.3 | 99.3  | 2.1     | 86.0  | 12.1 | 70.8  | 12.0 | 95.8  | 4.9 |
| w                  | UAS-grim     | 05/24/2006 | 83.5 | 9.9  | 76.0  | 5.8  | 92.7  | 9.7     | 80.5  | 10.4 | 78.7  | 7.2  | 97.8  | 3.1 |
| w                  | UAS-grim     | 05/30/2006 | 98.5 | 3.0  | 78.7  | 6.2  | 98.7  | 2.5     | 100.0 | 0.0  | 83.0  | 6.0  | 100.0 | 0.0 |
| w                  | UAS-grim     | 06/06/2006 | 99.0 | 1.9  | 76.2  | 12.1 | 98.8  | 2.2     | 99.0  | 1.9  | 88.9  | 6.7  | 99.4  | 1.7 |
| w                  | UAS-grim     | 09/26/2006 | 98.5 | 2.1  | 92.4  | 2.7  | 98.9  | 2.0     | 98.5  | 2.1  | 91.9  | 3.0  | 98.4  | 2.2 |
| w                  | UAS-grim     | 10/05/2006 | 91.0 | 3.8  | 100.0 | 0.0  | 99.0  | 2.1     | 95.0  | 5.0  | 99.0  | 2.0  | 100.0 | 0.0 |
| w                  | UAS-grim     | 10/12/2006 | 97.0 | 6.0  | 93.0  | 8.2  | 100.0 | 0.0     | 98.0  | 2.3  | 88.8  | 6.1  | 100.0 | 0.0 |
| w                  | UAS-grim     | 10/19/2006 | 99.0 | 2.0  | 88.8  | 7.2  | 95.2  | 4.3     | 98.0  | 2.3  | 90.0  | 7.6  | 98.9  | 2.3 |
| w                  | UAS-grim     | 10/23/2006 | 94.0 | 7.7  | 89.4  | 7.8  | 98.8  | 2.5     | 98.0  | 2.3  | 87.8  | 6.8  | 100.0 | 0.0 |
| w                  | UAS-grim     | 11/02/2006 | 89.0 | 3.8  | 81.2  | 11.7 | 98.5  | 3.1     | 95.0  | 3.8  | 84.3  | 8.8  | 100.0 | 0.0 |
| w                  | UAS-grim     | 11/16/2006 | 94.0 | 3.5  | 90.6  | 1.8  | 97.6  | 1.4     | 96.0  | 2.3  | 89.5  | 4.2  | 97.5  | 1.5 |
| w                  | UAS-grim     | 12/07/2006 | 98.0 | 1.2  | 90.9  | 3.5  | 99.0  | 1.0     | 99.0  | 1.0  | 86.8  | 5.7  | 98.8  | 1.3 |
| w                  | UAS-grim     | 01/24/2007 | 99.0 | 1.0  | 91.9  | 2.8  | 100.0 | 0.0     | 96.0  | 2.3  | 89.7  | 2.6  | 97.7  | 1.3 |
| w                  | UAS-grim     | 05/18/2005 | 97.0 | 4.1  | 86.9  | 5.7  | 94.9  | 6.0     | 96.0  | 3.0  | 90.7  | 9.3  | 97.8  | 2.4 |
| w                  | UAS-grim     | 11/27/2007 | 96.0 | 3.3  | 87.6  | 9.0  | 100.0 | 0.0     | 100.0 | 0.0  | 81.0  | 6.0  | 97.4  | 5.3 |
| w                  | UAS-grim     | 12/18/2007 | 93.0 | 3.8  | 87.1  | 10.4 | 97.8  | 4.5     | 91.0  | 5.0  | 92.5  | 6.5  | 98.9  | 2.2 |
| w                  | UAS-grim     | 01/18/2007 | 88.0 | 1.6  | 92.1  | 3.4  | 98.9  | 1.1     | 87.0  | 2.5  | 95.4  | 0.1  | 97.5  | 1.4 |
|                    |              |            | 94.0 | 5.4  | 86.9  | 5.3  | 97.8  | 1.9     | 93.7  | 6.3  | 87.4  | 6.6  | 98.2  | 1.6 |
| <b>DJ694 + 2.1</b> |              |            |      |      |       |      |       |         |       |      |       |      |       |     |
| UAS-grim;2.1       | DJ694        | 09/26/2006 | 77.0 | 4.8  | 51.1  | 7.9  | 0.0   | 0.0     | 72.0  | 7.6  | 13.2  | 3.2  | 0.0   | 0.0 |
|                    |              | 09/26/2006 | 88.5 | 2.3  | 19.0  | 7.7  | 0.0   | 0.0     | 85.0  | 2.1  | 25.3  | 4.7  | 0.0   | 0.0 |
| DJ694;2.1          | UAS-grim     | 10/12/2006 | 21.0 | 3.0  | 0.0   | 0.0  | 0.0   | 0.0     | 40.0  | 5.2  | 0.0   | 0.0  | 0.0   | 0.0 |
|                    |              | 10/19/2006 | 22.0 | 5.3  | 0.0   | 0.0  | 0.0   | 0.0     | 39.0  | 2.5  | 0.0   | 0.0  | 0.0   | 0.0 |
|                    |              |            | 52.1 | 35.7 | 17.5  | 24.1 | 0.0   | 0.0     | 59.0  | 23.1 | 9.6   | 12.1 | 0.0   | 0.0 |
| <b>DJ694 + 3.2</b> |              |            |      |      |       |      |       |         |       |      |       |      |       |     |
| 3.2;DJ694          | UAS-grim     | 09/26/2006 | 37.5 | 6.3  | 14.9  | 7.6  | 0.0   | 0.0     | 47.0  | 4.8  | 3.6   | 2.5  | 0.0   | 0.0 |
|                    |              | 11/16/2006 | 85.0 | 3.8  | 17.3  | 3.2  | 0.0   | 0.0     | 81.0  | 3.4  | 0.0   | 0.0  | 0.0   | 0.0 |
| UAS-grim           | 3.2;DJ694    | 11/23/2006 | 85.0 | 4.1  | 7.4   | 3.3  | 0.0   | 0.0     | 72.0  | 2.8  | 0.0   | 0.0  | 0.0   | 0.0 |
|                    |              |            | 69.2 | 27.4 | 13.2  | 5.2  | 0.0   | 0.0     | 66.7  | 17.6 | 1.2   | 2.1  | 0.0   | 0.0 |
| <b>DJ694 + 3.3</b> |              |            |      |      |       |      |       |         |       |      |       |      |       |     |
| UAS-grim;3.3       | DJ694        | 09/26/2006 | 33.0 | 3.8  | 8.0   | 4.5  | 0.0   | 0.0     | 15.5  | 3.1  | 0.0   | 0.0  | 0.0   | 0.0 |
|                    |              | 09/26/2006 | 66.0 | 5.0  | 3.1   | 1.7  | 0.0   | 0.0     | 50.5  | 3.2  | 0.0   | 0.0  | 0.0   | 0.0 |
| DJ694;3.3          | UAS-grim     | 10/12/2006 | 32.0 | 2.3  | 0.0   | 0.0  | 0.0   | 0.0     | 43.0  | 7.5  | 0.0   | 0.0  | 0.0   | 0.0 |
|                    |              | 10/19/2006 | 33.0 | 3.4  | 0.0   | 0.0  | 0.0   | 0.0     | 51.0  | 3.4  | 0.0   | 0.0  | 0.0   | 0.0 |
|                    |              | 11/16/2006 | 60.0 | 4.9  | 23.7  | 8.4  | 0.0   | 0.0     | 53.0  | 4.4  | 31.4  | 15.9 | 0.0   | 0.0 |
| DJ694              | UAS-grim;3.3 | 12/07/2006 | 85.0 | 3.4  | 45.1  | 6.7  | 10.8  | 4.2     | 78.0  | 4.8  | 10.1  | 1.8  | 0.0   | 0.0 |
|                    |              |            | 51.5 | 22.2 | 13.3  | 17.9 | 1.8   | 4.4     | 48.5  | 20.1 | 6.9   | 12.6 | 0.0   | 0.0 |
| <b>DJ694 + 4</b>   |              |            |      |      |       |      |       |         |       |      |       |      |       |     |
| UAS-grim           | 4;DJ694      | 11/16/2006 | 91.0 | 3.0  | 10.3  | 5.1  | 0.0   | 0.0     | 87.0  | 4.1  | 6.9   | 2.9  | 0.0   | 0.0 |
|                    |              | 11/23/2006 | 77.0 | 4.1  | 3.8   | 2.3  | 0.0   | 0.0     | 70.0  | 4.8  | 0.0   | 0.0  | 0.0   | 0.0 |
|                    |              |            | 84.0 | 9.9  | 7.0   | 4.6  | 0.0   | 0.0     | 78.5  | 12.0 | 3.5   | 4.9  | 0.0   | 0.0 |
| <b>3.3</b>         |              |            |      |      |       |      |       |         |       |      |       |      |       |     |
| UAS-grim;3.3       | w            | 06/27/2006 | 76.5 | 6.3  | 83.5  | 4.5  | 88.7  | 4.4     | 82.0  | 4.0  | 100.0 | 0.0  | 90.2  | 3.6 |
|                    |              | 10/23/2006 | 93.0 | 3.0  | 78.5  | 1.7  | 91.2  | 7.0     | 95.0  | 1.0  | 90.6  | 4.3  | 100.0 | 0.0 |
|                    |              | 38986.00   | 76.5 | 6.6  | 83.5  | 5.6  | 88.7  | 2.1     | 82.0  | 6.3  | 89.6  | 6.2  | 91.0  | 2.1 |
| DJ694;3.3          | w            | 06/27/2006 | 79.0 | 12.1 | 88.2  | 4.8  | 100.0 | 0.0     | 82.0  | 3.4  | 87.4  | 3.9  | 99.4  | 0.9 |
|                    |              | 10/23/2006 | 82.0 | 4.8  | 63.2  | 5.7  | 100.0 | 0.0     | 92.0  | 0.0  | 56.6  | 1.8  | 100.0 | 0.0 |
|                    |              |            | 81.4 | 6.9  | 79.4  | 9.7  | 93.7  | 5.8     | 86.6  | 6.4  | 84.8  | 16.5 | 96.1  | 5.1 |

| 7 of 10                     |                 | Parents    |      | Date | %L1  | SD      | %P    | SD   | %A    | SD   | %L1   | SD   | %P    | SD    | %A    | SD  |
|-----------------------------|-----------------|------------|------|------|------|---------|-------|------|-------|------|-------|------|-------|-------|-------|-----|
| Male                        | Female          | AMP        |      |      |      | AMP/TET |       |      |       |      |       |      |       |       |       |     |
| <b>2.1</b>                  |                 |            |      |      |      |         |       |      |       |      |       |      |       |       |       |     |
| UAS-grim;2.1                | w               | 10/23/2006 | 99.0 | 1.0  | 88.9 | 4.5     | 100.0 | 0.0  | 100.0 | 0.0  | 100.0 | 6.0  | 81.0  | 6.0   | 100.0 | 0.0 |
|                             |                 | 38986.00   | 73.0 | 6.3  | 81.3 | 12.8    | 100.0 | 0.0  | 79.5  | 7.4  | 83.2  | 11.4 | 99.3  | 99.3  | 0.0   | 0.0 |
| DJ694;2.1                   | w               | 06/27/2006 | 73.0 | 3.2  | 81.3 | 6.4     | 100.0 | 0.0  | 79.5  | 3.3  | 83.2  | 2.8  | 99.3  | 99.3  | 1.0   | 1.0 |
|                             |                 | 10/23/2006 | 79.0 | 1.0  | 88.7 | 2.4     | 95.7  | 2.8  | 73.0  | 1.9  | 86.2  | 1.9  | 100.0 | 100.0 | 0.0   | 0.0 |
|                             |                 |            | 81.0 | 2.5  | 85.0 | 4.5     | 98.9  | 1.4  | 83.0  | 3.1  | 83.4  | 4.3  | 99.6  | 99.6  | 0.5   | 0.5 |
| <b>3.2</b>                  |                 |            |      |      |      |         |       |      |       |      |       |      |       |       |       |     |
| 3.2;DJ694                   | w               | 38986.00   | 78.5 | 6.2  | 72.6 | 11.0    | 100.0 | 0.0  | 72.0  | 4.2  | 76.6  | 10.3 | 97.2  | 97.2  | 0.0   | 0.0 |
|                             |                 | 06/27/2006 | 78.5 | 1.5  | 72.6 | 3.3     | 100.0 | 0.0  | 72.0  | 3.9  | 76.6  | 4.9  | 97.2  | 97.2  | 2.0   | 2.0 |
|                             |                 |            | 78.5 | 0.0  | 72.6 | 0.0     | 100.0 | 0.0  | 72.0  | 0.0  | 76.6  | 0.0  | 97.2  | 97.2  | 0.0   | 0.0 |
| <b>DJ694 + 2 copies 2.1</b> |                 |            |      |      |      |         |       |      |       |      |       |      |       |       |       |     |
| UAS-grim;2.1                | DJ694;2.1       | 09/26/2006 | 69.0 | 5.8  | 81.6 | 4.6     | 19.1  | 2.6  | 76.0  | 3.9  | 67.3  | 8.6  | 0.0   | 0.0   | 0.0   | 0.0 |
|                             |                 | 10/23/2006 | 93.0 | 1.9  | 85.1 | 2.6     | 51.4  | 12.7 | 94.0  | 3.5  | 69.4  | 3.0  | 0.0   | 0.0   | 0.0   | 0.0 |
| DJ694;2.1                   | UAS-grim;2.1    | 11/02/2006 | 89.0 | 1.0  | 85.4 | 2.3     | 67.6  | 9.6  | 88.0  | 2.8  | 81.9  | 2.4  | 4.1   | 4.1   | 1.4   | 1.4 |
|                             |                 | 11/16/2006 | 94.0 | 1.2  | 88.5 | 3.5     | 27.8  | 2.2  | 94.0  | 3.5  | 81.9  | 2.0  | 0.0   | 0.0   | 0.0   | 0.0 |
|                             |                 |            | 86.3 | 11.7 | 85.1 | 2.8     | 41.5  | 22.1 | 88.0  | 8.5  | 75.1  | 7.9  | 1.0   | 1.0   | 2.1   | 2.1 |
| <b>DJ694 + 2.1 + 3.3</b>    |                 |            |      |      |      |         |       |      |       |      |       |      |       |       |       |     |
| UAS-grim;2.1                | DJ694;3.3       | 09/26/2006 | 88.5 | 2.3  | 65.6 | 3.9     | 36.2  | 5.1  | 75.5  | 6.0  | 40.8  | 8.1  | 0.0   | 0.0   | 0.0   | 0.0 |
| UAS-grim;3.3                | DJ694;2.1       | 09/26/2006 | 81.5 | 4.4  | 46.8 | 6.4     | 16.7  | 7.4  | 74.0  | 2.8  | 26.9  | 3.6  | 0.0   | 0.0   | 0.0   | 0.0 |
|                             |                 | 10/12/2006 | 47.0 | 3.0  | 78.5 | 9.7     | 42.1  | 7.8  | 52.0  | 3.7  | 76.9  | 2.9  | 0.0   | 0.0   | 0.0   | 0.0 |
| DJ694;3.3                   | UAS-grim;2.1    | 10/23/2006 | 90.0 | 3.5  | 70.6 | 5.3     | 22.4  | 12.0 | 91.0  | 2.5  | 65.9  | 2.6  | 0.0   | 0.0   | 0.0   | 0.0 |
|                             |                 | 11/02/2006 | 79.0 | 2.5  | 73.4 | 4.3     | 77.7  | 9.2  | 74.0  | 2.6  | 52.5  | 2.4  | 0.0   | 0.0   | 0.0   | 0.0 |
|                             |                 | 11/16/2006 | 84.0 | 4.3  | 61.4 | 8.0     | 38.4  | 6.2  | 76.0  | 1.6  | 58.0  | 4.0  | 0.0   | 0.0   | 0.0   | 0.0 |
| DJ694;2.1                   | UAS-grim;3.3    | 11/16/2006 | 81.0 | 6.2  | 65.2 | 3.2     | 3.4   | 2.0  | 73.0  | 4.4  | 61.9  | 2.3  | 0.0   | 0.0   | 0.0   | 0.0 |
|                             |                 | 12/07/2006 | 90.0 | 1.2  | 71.2 | 2.1     | 53.0  | 2.8  | 86.0  | 1.2  | 28.0  | 4.4  | 0.0   | 0.0   | 0.0   | 0.0 |
|                             |                 |            | 80.1 | 14.0 | 66.6 | 9.6     | 36.2  | 23.0 | 75.2  | 11.4 | 51.3  | 18.0 | 0.0   | 0.0   | 0.0   | 0.0 |
| <b>DJ694 + 2.1 + 3.2</b>    |                 |            |      |      |      |         |       |      |       |      |       |      |       |       |       |     |
| UAS-grim;2.1                | 3.2;DJ694       | 09/26/2006 | 64.5 | 6.1  | 45.9 | 14.2    | 6.8   | 5.0  | 54.5  | 7.0  | 36.4  | 9.4  | 0.0   | 0.0   | 0.0   | 0.0 |
|                             |                 | 11/16/2006 | 89.0 | 4.4  | 54.0 | 8.3     | 0.0   | 0.0  | 86.0  | 3.5  | 51.1  | 2.7  | 0.0   | 0.0   | 0.0   | 0.0 |
|                             |                 | 11/23/2006 | 87.0 | 5.0  | 69.6 | 4.8     | 0.0   | 0.0  | 84.0  | 2.3  | 48.7  | 3.1  | 0.0   | 0.0   | 0.0   | 0.0 |
|                             |                 |            | 80.2 | 13.6 | 56.5 | 12.1    | 2.3   | 3.9  | 74.8  | 17.6 | 45.4  | 7.9  | 0.0   | 0.0   | 0.0   | 0.0 |
| <b>DJ694 + 2 copies 3.3</b> |                 |            |      |      |      |         |       |      |       |      |       |      |       |       |       |     |
| UAS-grim;3.3                | DJ694;3.3       | 09/26/2006 | 42.0 | 3.4  | 42.3 | 6.2     | 40.1  | 5.7  | 61.0  | 5.7  | 20.9  | 6.8  | 0.0   | 0.0   | 0.0   | 0.0 |
|                             |                 | 10/12/2006 | 44.0 | 9.4  | 60.1 | 7.0     | 9.8   | 6.1  | 66.0  | 5.0  | 8.3   | 3.2  | 0.0   | 0.0   | 0.0   | 0.0 |
| DJ694;3.3                   | UAS-grim;3.3    | 11/16/2006 | 67.0 | 3.0  | 52.5 | 6.1     | 0.0   | 0.0  | 68.0  | 7.8  | 64.2  | 7.3  | 0.0   | 0.0   | 0.0   | 0.0 |
|                             |                 | 12/07/2006 | 67.0 | 5.3  | 16.3 | 1.9     | 52.1  | 16.8 | 71.0  | 1.0  | 24.0  | 3.5  | 0.0   | 0.0   | 0.0   | 0.0 |
|                             |                 |            | 55.0 | 13.9 | 42.8 | 19.1    | 25.5  | 24.6 | 66.5  | 4.2  | 29.4  | 24.2 | 0.0   | 0.0   | 0.0   | 0.0 |
| <b>DJ694 + 3.2 + 3.3</b>    |                 |            |      |      |      |         |       |      |       |      |       |      |       |       |       |     |
| UAS-grim;3.3                | 3.2;DJ694       | 09/26/2006 | 58.0 | 7.0  | 51.9 | 6.6     | 6.7   | 3.9  | 52.0  | 4.8  | 9.9   | 3.7  | 0.0   | 0.0   | 0.0   | 0.0 |
|                             |                 | 11/16/2006 | 78.0 | 1.2  | 47.3 | 6.3     | 0.0   | 0.0  | 90.0  | 2.6  | 12.6  | 4.7  | 0.0   | 0.0   | 0.0   | 0.0 |
|                             |                 | 11/23/2006 | 82.0 | 2.6  | 39.5 | 5.4     | 0.0   | 0.0  | 76.0  | 3.7  | 11.1  | 3.6  | 0.0   | 0.0   | 0.0   | 0.0 |
|                             |                 |            | 72.7 | 12.9 | 46.2 | 6.3     | 2.2   | 3.9  | 72.7  | 19.2 | 11.2  | 1.3  | 0.0   | 0.0   | 0.0   | 0.0 |
| <b>DJ694 + 2.1 + 4</b>      |                 |            |      |      |      |         |       |      |       |      |       |      |       |       |       |     |
| UAS-grim;2.1                | 4;DJ694         | 11/16/2006 | 86.0 | 4.2  | 29.0 | 8.0     | 0.0   | 0.0  | 77.0  | 3.0  | 25.7  | 3.6  | 0.0   | 0.0   | 0.0   | 0.0 |
|                             |                 | 11/23/2006 | 77.0 | 4.1  | 44.2 | 11.0    | 0.0   | 0.0  | 87.0  | 3.4  | 25.2  | 2.2  | 0.0   | 0.0   | 0.0   | 0.0 |
|                             |                 |            | 81.5 | 6.4  | 36.6 | 10.7    | 0.0   | 0.0  | 82.0  | 7.1  | 25.4  | 0.4  | 0.0   | 0.0   | 0.0   | 0.0 |
| <b>DJ694 + 3.3 + 4</b>      |                 |            |      |      |      |         |       |      |       |      |       |      |       |       |       |     |
| UAS-grim;3.3                | 4;DJ694         | 11/16/2006 | 95.0 | 3.0  | 15.9 | 1.4     | 0.0   | 0.0  | 94.0  | 2.6  | 9.8   | 3.3  | 0.0   | 0.0   | 0.0   | 0.0 |
|                             |                 | 11/23/2006 | 90.0 | 2.0  | 23.1 | 5.8     | 0.0   | 0.0  | 88.0  | 3.7  | 4.8   | 2.1  | 0.0   | 0.0   | 0.0   | 0.0 |
|                             |                 |            | 92.5 | 3.5  | 19.5 | 5.1     | 0.0   | 0.0  | 91.0  | 4.2  | 7.3   | 3.6  | 0.0   | 0.0   | 0.0   | 0.0 |
| <b>DJ694 + DJ1077 + 3.3</b> |                 |            |      |      |      |         |       |      |       |      |       |      |       |       |       |     |
| DJ694;DJ1077                | UAS-grim;3.3    | 12/07/2006 | 92.0 | 3.7  | 63.0 | 7.6     | 78.3  | 2.9  | 77.0  | 4.4  | 19.7  | 4.3  | 0.0   | 0.0   | 0.0   | 0.0 |
|                             |                 | 11/30/2006 | 91.0 | 4.1  | 64.1 | 6.4     | 86.5  | 3.2  | 96.0  | 1.6  | 22.9  | 2.4  | 0.0   | 0.0   | 0.0   | 0.0 |
| DJ694;3.3                   | UAS-grim;DJ1077 | 12/14/2006 | 84.0 | 4.9  | 64.3 | 4.7     | 95.7  | 2.5  | 77.0  | 2.5  | 18.2  | 6.6  | 0.0   | 0.0   | 0.0   | 0.0 |
|                             |                 | 12/14/2006 | 50.0 | 5.8  | 38.5 | 6.0     | 100.0 | 0.0  | 42.0  | 2.0  | 14.6  | 3.1  | 0.0   | 0.0   | 0.0   | 0.0 |
|                             |                 |            | 79.3 | 19.8 | 57.4 | 12.7    | 90.1  | 9.7  | 73.0  | 22.5 | 18.8  | 3.4  | 0.0   | 0.0   | 0.0   | 0.0 |
| <b>DJ694 + DJ1080 + 3.3</b> |                 |            |      |      |      |         |       |      |       |      |       |      |       |       |       |     |
| DJ694;DJ1080                | UAS-grim;3.3    | 12/07/2006 | 97.0 | 1.9  | 49.6 | 1.0     | 77.1  | 8.6  | 95.0  | 1.9  | 11.6  | 3.6  | 0.0   | 0.0   | 0.0   | 0.0 |
|                             |                 | 11/30/2006 | 92.0 | 2.8  | 53.7 | 4.5     | 38.6  | 2.2  | 99.0  | 1.0  | 22.3  | 4.0  | 0.0   | 0.0   | 0.0   | 0.0 |
| DJ694;3.3                   | UAS-grim;DJ1080 | 12/14/2006 | 72.0 | 1.6  | 54.2 | 6.9     | 23.9  | 7.7  | 80.0  | 2.8  | 14.7  | 6.1  | 0.0   | 0.0   | 0.0   | 0.0 |
|                             |                 | 12/14/2006 | 41.0 | 5.7  | 32.7 | 10.6    | 57.9  | 16.5 | 38.0  | 6.2  | 0.0   | 0.0  | 0.0   | 0.0   | 0.0   | 0.0 |
|                             |                 |            | 75.5 | 25.4 | 47.6 | 10.1    | 49.4  | 23.2 | 78.0  | 27.9 | 12.1  | 9.3  | 0.0   | 0.0   | 0.0   | 0.0 |

| Parents      |                         | Date       | %L1                         | SD   | %P   | SD   | %A      | SD   | %L1  | SD   | %P   | SD   | %A    | SD  |
|--------------|-------------------------|------------|-----------------------------|------|------|------|---------|------|------|------|------|------|-------|-----|
| Male         | Female                  |            | AMP                         |      |      |      | AMP/TET |      |      |      |      |      |       |     |
|              |                         |            | <b>DJ694 + DJ1083 + 3.3</b> |      |      |      |         |      |      |      |      |      |       |     |
| DJ694;DJ1083 | UAS-grim;3.3            | 12/07/2006 | 97.0                        | 1.9  | 64.9 | 2.8  | 53.9    | 2.4  | 97.0 | 4.4  | 30.2 | 2.3  | 92.9  | 4.1 |
|              |                         | 11/30/2006 | 93.0                        | 3.0  | 50.4 | 3.6  | 82.6    | 7.7  | 82.0 | 6.0  | 45.9 | 4.3  | 94.4  | 3.3 |
| DJ694;3.3    | UAS-grim;DJ1083         | 12/07/2006 | 84.0                        | 2.8  | 69.1 | 2.0  | 34.2    | 6.2  | 60.0 | 2.8  | 28.0 | 4.0  | 0.0   | 0.0 |
|              |                         | 12/14/2006 | 84.0                        | 5.4  | 55.8 | 4.1  | 27.0    | 5.8  | 83.0 | 4.4  | 28.2 | 3.7  | 0.0   | 0.0 |
|              |                         |            | 84.0                        | 0.0  | 62.5 | 9.4  | 30.6    | 5.1  | 71.5 | 16.3 | 28.1 | 0.1  | 0.0   | 0.0 |
|              |                         |            | <b>DJ694 + DJ1079 + 3.3</b> |      |      |      |         |      |      |      |      |      |       |     |
| DJ694;3.3    | UAS-grim;DJ1079         | 12/07/2006 | 86.0                        | 3.8  | 44.5 | 5.9  | 16.5    | 9.7  | 78.0 | 2.6  | 11.7 | 1.4  | 0.0   | 0.0 |
|              |                         | 12/14/2006 | 72.0                        | 4.9  | 64.7 | 8.2  | 66.0    | 15.3 | 82.0 | 4.8  | 34.4 | 4.9  | 0.0   | 0.0 |
|              |                         | 12/14/2006 | 99.0                        | 1.0  | 71.9 | 8.7  | 88.9    | 4.8  | 92.0 | 1.6  | 44.4 | 4.7  | 0.0   | 0.0 |
|              |                         |            | 85.7                        | 13.5 | 60.4 | 14.2 | 57.1    | 37.0 | 84.0 | 7.2  | 30.2 | 16.8 | 0.0   | 0.0 |
|              |                         |            | <b>DJ694 + DJ1079 + 4</b>   |      |      |      |         |      |      |      |      |      |       |     |
| 4;DJ694      | UAS-grim;DJ1079         | 12/07/2006 | 84.0                        | 2.8  | 28.0 | 7.7  | 0.0     | 0.0  | 84.0 | 2.3  | 8.3  | 2.2  | 0.0   | 0.0 |
|              |                         | 12/14/2006 | 80.0                        | 2.8  | 11.6 | 6.7  | 0.0     | 0.0  | 75.0 | 3.4  | 0.0  | 0.0  | 0.0   | 0.0 |
|              |                         |            | 82.0                        | 2.8  | 19.8 | 11.6 | 0.0     | 0.0  | 79.5 | 6.4  | 4.2  | 5.9  | 0.0   | 0.0 |
|              |                         |            | <b>DJ694 + DJ1083 + 4</b>   |      |      |      |         |      |      |      |      |      |       |     |
| 4;DJ694      | UAS-grim;DJ1083         | 12/07/2006 | 85.0                        | 4.1  | 32.8 | 11.2 | 0.0     | 0.0  | 90.0 | 2.0  | 2.2  | 1.3  | 0.0   | 0.0 |
|              |                         | 12/14/2006 | 86.0                        | 2.0  | 62.0 | 8.2  | 0.0     | 0.0  | 74.0 | 2.6  | 9.1  | 6.2  | 0.0   | 0.0 |
|              |                         |            | 85.5                        | 0.7  | 47.4 | 20.7 | 0.0     | 0.0  | 82.0 | 11.3 | 5.7  | 4.9  | 0.0   | 0.0 |
|              |                         |            | <b>DJ694 + DJ1077 + 2.1</b> |      |      |      |         |      |      |      |      |      |       |     |
| DJ694;DJ1077 | UAS-grim;2.1            | 12/07/2006 | 94.0                        | 1.2  | 71.2 | 3.9  | 82.5    | 2.4  | 89.0 | 1.9  | 57.4 | 4.3  | 0.0   | 0.0 |
|              |                         | 02/01/2007 | 97.0                        | 1.0  | 66.1 | 4.3  | 91.2    | 3.5  | 90.0 | 4.2  | 46.8 | 1.4  | 0.0   | 0.0 |
|              |                         | 02/08/2007 | 97.0                        | 1.0  | 72.1 | 4.1  | 88.8    | 1.9  | 92.0 | 1.6  | 44.8 | 5.9  | 0.0   | 0.0 |
|              |                         | 01/18/2007 | 90.0                        | 3.5  | 62.6 | 5.7  | 89.9    | 5.3  | 76.0 | 4.9  | 48.3 | 3.1  | 0.0   | 0.0 |
| DJ694;2.1    | UAS-grim;DJ1077         | 01/24/2007 | 94.0                        | 2.6  | 54.5 | 2.4  | 84.5    | 4.3  | 87.0 | 1.9  | 34.5 | 3.8  | 0.0   | 0.0 |
|              |                         |            | 94.4                        | 2.9  | 69.8 | 3.2  | 87.5    | 4.5  | 90.3 | 1.5  | 49.6 | 6.8  | 0.0   | 0.0 |
|              |                         |            | <b>DJ694 + DJ1080 + 2.1</b> |      |      |      |         |      |      |      |      |      |       |     |
| DJ694;DJ1080 | UAS-grim;2.1            | 12/07/2006 | 88.0                        | 2.8  | 57.7 | 3.1  | 20.0    | 7.4  | 94.0 | 1.2  | 37.3 | 2.2  | 0.0   | 0.0 |
|              |                         | 02/01/2007 | 97.0                        | 1.0  | 58.8 | 5.5  | 37.5    | 12.9 | 95.0 | 1.9  | 41.0 | 3.7  | 0.0   | 0.0 |
|              |                         | 02/08/2007 | 97.0                        | 1.0  | 61.9 | 2.7  | 31.7    | 0.6  | 92.0 | 2.8  | 48.9 | 4.6  | 0.0   | 0.0 |
|              |                         | 01/18/2007 | 93.0                        | 3.4  | 67.0 | 5.0  | 39.5    | 5.5  | 84.0 | 4.3  | 38.1 | 7.7  | 0.0   | 0.0 |
| DJ694;2.1    | UAS-grim;DJ1080         | 01/24/2007 | 82.0                        | 4.8  | 63.6 | 2.9  | 57.6    | 4.7  | 85.0 | 1.9  | 37.2 | 13.5 | 1.8   | 1.8 |
|              |                         |            | 91.4                        | 6.4  | 61.8 | 3.7  | 37.3    | 13.7 | 90.0 | 5.1  | 40.5 | 5.0  | 0.4   | 0.8 |
|              |                         |            | <b>DJ694 + DJ1083 + 2.1</b> |      |      |      |         |      |      |      |      |      |       |     |
| DJ694;DJ1083 | UAS-grim;2.1            | 12/07/2006 | 89.0                        | 1.9  | 59.4 | 4.0  | 26.5    | 6.9  | 85.0 | 3.4  | 41.9 | 5.8  | 40.8  | 6.8 |
|              |                         | 02/01/2007 | 97.0                        | 1.9  | 63.1 | 7.1  | 42.8    | 6.4  | 92.0 | 3.3  | 45.5 | 2.2  | 0.0   | 0.0 |
|              |                         | 02/08/2007 | 98.0                        | 1.2  | 67.6 | 6.1  | 49.0    | 11.3 | 97.0 | 1.0  | 59.8 | 4.3  | 0.0   | 0.0 |
|              |                         |            | 97.5                        | 0.7  | 65.3 | 3.2  | 45.9    | 4.3  | 94.5 | 3.5  | 52.7 | 10.1 | 0.0   | 0.0 |
|              |                         |            | <b>DJ694 + DJ1077 + 4</b>   |      |      |      |         |      |      |      |      |      |       |     |
| 4;DJ694      | UAS-grim;DJ1077         | 12/14/2006 | 84.0                        | 5.2  | 67.3 | 4.8  | 6.0     | 4.0  | 85.0 | 4.1  | 7.3  | 2.6  | 0.0   | 0.0 |
|              |                         | 12/14/2006 | 84.0                        | 2.3  | 59.0 | 8.8  | 0.0     | 0.0  | 82.0 | 6.2  | 0.0  | 0.0  | 0.0   | 0.0 |
|              |                         |            | 84.0                        | 0.0  | 63.1 | 5.9  | 3.0     | 4.2  | 83.5 | 2.1  | 3.6  | 5.1  | 0.0   | 0.0 |
|              |                         |            | <b>DJ694 + DJ1080 + 4</b>   |      |      |      |         |      |      |      |      |      |       |     |
| 4;DJ694      | UAS-grim;DJ1080         | 12/14/2006 | 69.0                        | 10.0 | 11.4 | 6.9  | 0.0     | 0.0  | 56.0 | 5.2  | 9.6  | 2.9  | 0.0   | 0.0 |
|              |                         | 12/14/2006 | 63.0                        | 5.7  | 17.4 | 6.6  | 0.0     | 0.0  | 56.0 | 6.3  | 8.1  | 3.9  | 0.0   | 0.0 |
|              |                         |            | 66.0                        | 4.2  | 14.4 | 4.2  | 0.0     | 0.0  | 56.0 | 0.0  | 8.9  | 1.1  | 0.0   | 0.0 |
|              |                         |            | <b>DJ694 + DJ1079 + 2.1</b> |      |      |      |         |      |      |      |      |      |       |     |
| DJ694;2.1    | UAS-grim;DJ1079         | 01/18/2007 | 94.0                        | 2.0  | 88.2 | 4.1  | 89.8    | 5.4  | 88.0 | 2.8  | 44.4 | 1.9  | 0.0   | 0.0 |
|              |                         | 01/24/2007 | 94.0                        | 2.6  | 73.8 | 4.0  | 91.3    | 3.7  | 91.0 | 2.5  | 54.9 | 6.8  | 0.0   | 0.0 |
| DJ694;DJ1079 | UAS-grim;2.1            | 02/01/2007 | 97.0                        | 1.0  | 57.8 | 5.1  | 31.8    | 4.7  | 93.0 | 1.9  | 29.2 | 3.8  | 3.6   | 3.6 |
|              |                         | 02/08/2007 | 94.0                        | 3.5  | 57.7 | 8.1  | 3.8     | 2.4  | 93.0 | 3.0  | 47.5 | 4.0  | 0.0   | 0.0 |
|              |                         |            | 94.8                        | 1.5  | 69.4 | 14.7 | 54.2    | 43.5 | 91.3 | 2.4  | 44.0 | 10.8 | 0.9   | 1.8 |
|              |                         |            | <b>DJ1077 + 2.1</b>         |      |      |      |         |      |      |      |      |      |       |     |
| w            | UAS-grim;2.1+DJ1077     | 11/20/2007 | 100.0                       | 0.0  | 74.0 | 7.7  | 100.0   | 0.0  | 97.0 | 3.8  | 70.1 | 6.3  | 100.0 | 0.0 |
|              |                         | 12/11/2007 | 86.0                        | 8.3  | 78.6 | 10.9 | 97.4    | 5.3  | 91.0 | 8.9  | 75.5 | 8.8  | 95.0  | 6.4 |
|              |                         |            | 93.0                        | 9.9  | 76.3 | 3.2  | 98.7    | 1.9  | 94.0 | 4.2  | 72.8 | 3.9  | 97.5  | 3.5 |
|              |                         |            | <b>DJ1079 + 2.1</b>         |      |      |      |         |      |      |      |      |      |       |     |
| w            | UAS-grim;2.1+DJ1079(13) | 11/27/2007 | 75.0                        | 13.2 | 52.9 | 11.8 | 100.0   | 0.0  | 93.0 | 5.0  | 57.1 | 3.8  | 100.0 | 0.0 |
|              |                         | 12/18/2007 | 85.0                        | 6.0  | 60.0 | 15.1 | 100.0   | 0.0  | 80.3 | 4.9  | 69.2 | 13.8 | 100.0 | 0.0 |
| w            | UAS-grim;2.1+DJ1079(14) | 11/13/2007 | 94.0                        | 5.2  | 85.3 | 4.9  | 98.7    | 2.6  | 94.0 | 2.3  | 84.3 | 11.3 | 98.8  | 2.4 |
|              |                         | 12/04/2007 | 87.0                        | 3.8  | 80.7 | 11.7 | 100.0   | 0.0  | 79.0 | 5.0  | 74.6 | 4.4  | 98.5  | 3.1 |
|              |                         |            | 85.3                        | 7.8  | 69.7 | 15.7 | 99.7    | 0.6  | 86.6 | 8.0  | 71.3 | 11.4 | 99.3  | 0.8 |

| Parents                                       |                         | Date       | %L1  | SD   | %P   | SD   | %A    | SD   | %L1     | SD   | %P   | SD   | %A    | SD  |
|-----------------------------------------------|-------------------------|------------|------|------|------|------|-------|------|---------|------|------|------|-------|-----|
| Male                                          | Female                  |            | AMP  |      |      |      |       |      | AMP/TET |      |      |      |       |     |
| <b>DJ1077 + 3.3</b>                           |                         |            |      |      |      |      |       |      |         |      |      |      |       |     |
| w                                             | UAS-grim;3.3+DJ1077     | 11/20/2007 | 46.0 | 12.4 | 88.5 | 13.3 | 100.0 | 0.0  | 72.0    | 3.3  | 90.3 | 12.3 | 100.0 | 0.0 |
|                                               |                         | 12/11/2007 | 90.0 | 9.5  | 54.4 | 14.9 | 100.0 | 0.0  | 86.0    | 8.3  | 60.1 | 14.7 | 100.0 | 0.0 |
|                                               |                         |            | 68.0 | 31.1 | 71.4 | 24.1 | 100.0 | 0.0  | 79.0    | 9.9  | 75.2 | 21.3 | 100.0 | 0.0 |
| <b>DJ1079 + 3.3</b>                           |                         |            |      |      |      |      |       |      |         |      |      |      |       |     |
| w                                             | UAS-grim;3.3+DJ1079     | 11/13/2007 | 89.0 | 3.8  | 54.1 | 9.1  | 96.2  | 4.4  | 84.0    | 5.7  | 47.9 | 9.9  | 100.0 | 0.0 |
|                                               |                         | 12/04/2007 | 74.0 | 16.5 | 92.2 | 4.0  | 98.1  | 3.8  | 72.0    | 11.8 | 96.1 | 4.6  | 98.6  | 2.9 |
|                                               |                         |            | 81.5 | 10.6 | 73.1 | 26.9 | 97.2  | 1.3  | 78.0    | 8.5  | 72.0 | 34.1 | 99.3  | 1.0 |
| <b>DJ694 + DJ1077 + DJ1080 + 2.1</b>          |                         |            |      |      |      |      |       |      |         |      |      |      |       |     |
| DJ694;2.1                                     | UAS-grim; DJ1077+DJ1080 | 10/05/2006 | 90.0 | 1.2  | 66.6 | 4.7  | 15.2  | 5.2  | 96.0    | 1.6  | 70.7 | 8.4  | 0.0   | 0.0 |
|                                               |                         | 10/12/2006 | 69.0 | 6.6  | 80.5 | 5.2  | 69.6  | 7.1  | 69.0    | 1.9  | 59.6 | 4.5  | 0.0   | 0.0 |
|                                               |                         | 11/16/2006 | 99.0 | 1.0  | 84.9 | 0.9  | 83.4  | 5.7  | 96.0    | 1.6  | 77.0 | 3.0  | 0.0   | 0.0 |
| DJ694; DJ1077+DJ1080                          | UAS-grim;2.1            | 10/19/2006 | 95.0 | 1.0  | 87.5 | 1.6  | 85.4  | 5.5  | 94.0    | 4.8  | 53.4 | 12.5 | 0.0   | 0.0 |
|                                               |                         | 11/02/2006 | 95.0 | 3.0  | 91.9 | 4.3  | 81.8  | 4.8  | 91.0    | 2.5  | 74.7 | 2.4  | 0.0   | 0.0 |
|                                               |                         | 12/07/2006 | 83.0 | 3.8  | 87.5 | 3.8  | 67.9  | 5.1  | 88.0    | 2.3  | 56.1 | 6.8  | 0.0   | 0.0 |
|                                               |                         | 88.5       | 11.0 | 83.1 | 8.9  | 67.2 | 26.5  | 89.0 | 10.3    | 65.2 | 10.1 | 0.0  | 0.0   |     |
| <b>DJ694 + DJ1077 + DJ1083 + 2.1</b>          |                         |            |      |      |      |      |       |      |         |      |      |      |       |     |
| DJ694;2.1                                     | UAS-grim;DJ1077+DJ1083  | 10/05/2006 | 57.0 | 6.6  | 53.2 | 13.1 | 11.8  | 6.8  | 69.0    | 8.4  | 37.9 | 7.4  | 0.0   | 0.0 |
|                                               |                         | 10/12/2006 | 28.0 | 3.3  | 58.9 | 7.0  | 80.4  | 7.1  | 24.0    | 4.9  | 53.3 | 10.5 | 0.0   | 0.0 |
|                                               |                         | 11/16/2006 | 69.0 | 5.3  | 67.4 | 5.6  | 88.4  | 4.4  |         |      |      |      |       |     |
| DJ694;DJ1077+DJ1083                           | UAS-grim;2.1            | 10/19/2006 | 95.0 | 3.0  | 86.3 | 4.5  | 75.2  | 3.0  | 99.0    | 1.0  | 69.9 | 6.9  | 83.8  | 1.8 |
|                                               |                         |            | 51.3 | 21.1 | 59.8 | 7.1  | 60.2  | 42.1 | 46.5    | 31.8 | 45.6 | 10.9 | 0.0   | 0.0 |
|                                               |                         |            |      |      |      |      |       |      |         |      |      |      |       |     |
| <b>DJ694 + DJ1080 + DJ1083 + 2.1</b>          |                         |            |      |      |      |      |       |      |         |      |      |      |       |     |
| DJ694;2.1                                     | UAS-grim;DJ1080+DJ1083  | 10/05/2006 | 85.0 | 3.4  | 61.4 | 2.5  | 19.3  | 7.4  | 76.0    | 3.7  | 42.4 | 5.2  | 0.0   | 0.0 |
|                                               |                         | 10/12/2006 | 67.0 | 6.2  | 86.3 | 7.8  | 54.7  | 10.9 | 75.0    | 6.6  | 59.5 | 7.6  | 0.0   | 0.0 |
|                                               |                         | 11/16/2006 | 96.0 | 0.0  | 87.5 | 0.0  | 91.7  | 2.3  | 95.0    | 1.0  | 68.5 | 7.1  | 0.0   | 0.0 |
| DJ694;DJ1080+DJ1083                           | UAS-grim;2.1            | 10/19/2006 | 99.0 | 1.0  | 74.8 | 4.1  | 11.6  | 4.7  | 96.0    | 1.6  | 27.2 | 2.1  | 0.0   | 0.0 |
|                                               |                         | 11/02/2006 | 97.0 | 1.0  | 85.7 | 3.5  | 23.4  | 7.7  | 98.0    | 2.0  | 53.3 | 4.7  | 0.0   | 0.0 |
|                                               |                         | 12/07/2006 | 84.0 | 4.3  | 58.0 | 7.4  | 10.8  | 4.6  | 88.0    | 3.7  | 25.4 | 3.3  | 0.0   | 0.0 |
|                                               |                         | 88.0       | 12.1 | 75.6 | 13.2 | 35.2 | 32.0  | 88.0 | 10.3    | 46.1 | 17.5 | 0.0  | 0.0   |     |
| <b>DJ694 + DJ1077 + DJ1080 + 3.3</b>          |                         |            |      |      |      |      |       |      |         |      |      |      |       |     |
| DJ694;3.3                                     | UAS-grim; DJ1077+DJ1080 | 10/05/2006 | 44.0 | 5.7  | 60.7 | 8.3  | 41.9  | 16.9 | 82.0    | 4.8  | 41.6 | 3.5  | 0.0   | 0.0 |
|                                               |                         | 10/12/2006 | 66.0 | 4.8  | 83.3 | 2.7  | 90.9  | 1.8  | 71.0    | 4.1  | 69.4 | 14.2 | 0.0   | 0.0 |
|                                               |                         | 11/16/2006 | 97.0 | 1.0  | 75.3 | 3.0  | 95.8  | 2.6  | 95.0    | 1.9  | 60.9 | 9.6  | 0.0   | 0.0 |
| DJ694; DJ1077+DJ1080                          | UAS-grim;3.3            | 10/19/2006 | 94.0 | 2.6  | 69.6 | 5.1  | 92.5  | 3.0  | 87.0    | 1.0  | 40.4 | 5.1  | 0.0   | 0.0 |
|                                               |                         | 11/02/2006 | 87.0 | 1.9  | 94.3 | 1.1  | 92.5  | 3.2  | 93.0    | 1.9  | 44.4 | 7.9  | 0.0   | 0.0 |
|                                               |                         |            | 77.6 | 22.3 | 76.6 | 12.9 | 82.7  | 22.9 | 85.6    | 9.6  | 51.3 | 13.0 | 0.0   | 0.0 |
| <b>DJ694 + DJ1077 + DJ1083 + 3.3</b>          |                         |            |      |      |      |      |       |      |         |      |      |      |       |     |
| DJ694;3.3                                     | UAS-grim;DJ1077+DJ1083  | 10/05/2006 | 56.0 | 2.3  | 53.4 | 2.8  | 59.8  | 8.5  | 41.0    | 4.4  | 46.9 | 3.5  | 0.0   | 0.0 |
|                                               |                         | 10/12/2006 | 34.0 | 2.6  | 49.4 | 3.9  | 77.1  | 10.4 | 32.0    | 7.5  | 46.8 | 7.0  | 0.0   | 0.0 |
|                                               |                         | 11/16/2006 | 86.0 | 4.8  | 30.3 | 2.7  | 91.9  | 4.9  | 29.0    | 2.5  | 67.7 | 10.1 | 0.0   | 0.0 |
| DJ694;DJ1077+DJ1083                           | UAS-grim;3.3            | 10/19/2006 | 93.0 | 1.0  | 76.6 | 4.8  | 88.1  | 7.0  | 86.0    | 4.8  | 66.3 | 5.9  | 79.4  | 8.2 |
|                                               |                         |            | 58.7 | 26.1 | 44.3 | 12.3 | 76.3  | 16.1 | 34.0    | 6.2  | 53.8 | 12.0 | 0.0   | 0.0 |
|                                               |                         |            |      |      |      |      |       |      |         |      |      |      |       |     |
| <b>DJ694 + DJ1080 + DJ1083 + 3.3</b>          |                         |            |      |      |      |      |       |      |         |      |      |      |       |     |
| DJ694;3.3                                     | UAS-grim;DJ1080+DJ1083  | 10/05/2006 | 67.0 | 1.9  | 67.6 | 5.0  | 48.3  | 9.8  | 67.0    | 5.0  | 30.0 | 3.8  | 0.0   | 0.0 |
|                                               |                         | 10/12/2006 | 57.0 | 3.4  | 96.4 | 2.1  | 100.0 | 0.0  | 70.0    | 3.8  | 56.5 | 5.9  | 0.0   | 0.0 |
|                                               |                         | 11/16/2006 | 98.0 | 1.2  | 63.1 | 4.8  | 100.0 | 0.0  | 85.0    | 3.4  | 66.3 | 3.7  | 0.0   | 0.0 |
| DJ694;DJ1080+DJ1083                           | UAS-grim;3.3            | 10/19/2006 | 88.0 | 3.3  | 38.4 | 6.1  | 54.5  | 11.1 | 89.0    | 3.0  | 12.3 | 1.9  | 0.0   | 0.0 |
|                                               |                         | 11/02/2006 | 91.0 | 1.9  | 66.1 | 7.6  | 30.5  | 6.9  | 88.0    | 3.7  | 18.1 | 2.8  | 0.0   | 0.0 |
|                                               |                         |            | 80.2 | 17.4 | 66.3 | 20.6 | 66.6  | 31.7 | 79.8    | 10.5 | 36.6 | 23.7 | 0.0   | 0.0 |
| <b>DJ694 + DJ1079 + DJ1080 + 2.1</b>          |                         |            |      |      |      |      |       |      |         |      |      |      |       |     |
| DJ694;DJ1079+DJ1080                           | UAS-grim;2.1            | 10/19/2006 | 93.0 | 1.9  | 94.7 | 3.2  | 80.7  | 7.3  | 89.0    | 4.4  | 58.3 | 3.5  | 0.0   | 0.0 |
|                                               |                         | 11/02/2006 | 65.0 | 6.6  | 86.8 | 4.5  | 59.7  | 6.1  | 57.0    | 8.2  | 53.7 | 3.5  | 0.0   | 0.0 |
|                                               |                         | 12/07/2006 | 79.0 | 6.8  | 67.4 | 4.0  | 62.1  | 1.4  | 79.0    | 3.8  | 51.6 | 8.0  | 0.0   | 0.0 |
|                                               |                         |            | 79.0 | 14.0 | 83.0 | 14.0 | 67.5  | 11.5 | 75.0    | 16.4 | 54.5 | 3.5  | 0.0   | 0.0 |
| <b>DJ694 + DJ1079 + DJ1080 + 3.3</b>          |                         |            |      |      |      |      |       |      |         |      |      |      |       |     |
| DJ694;DJ1079+DJ1080                           | UAS-grim;3.3            | 10/19/2006 | 92.0 | 5.4  | 70.7 | 6.1  | 94.8  | 3.7  | 85.0    | 5.0  | 65.6 | 13.1 | 0.0   | 0.0 |
|                                               |                         | 11/02/2006 | 77.0 | 3.4  | 92.6 | 3.1  | 91.6  | 1.7  | 82.0    | 2.0  | 54.1 | 4.9  | 0.0   | 0.0 |
|                                               |                         |            | 84.5 | 10.6 | 81.7 | 15.5 | 93.2  | 2.3  | 83.5    | 2.1  | 59.9 | 8.2  | 0.0   | 0.0 |
| <b>DJ694 + 2 copies DJ1077 + 2 copies 2.1</b> |                         |            |      |      |      |      |       |      |         |      |      |      |       |     |
| DJ694;2.1+DJ1077                              | UAS-grim;2.1+DJ1077     | 11/20/2007 | 82.0 | 12.0 | 69.3 | 12.0 | 93.5  | 4.4  | 81.0    | 2.0  | 75.4 | 10.6 | 0.0   | 0.0 |
|                                               |                         | 12/11/2007 | 84.0 | 5.7  | 88.8 | 11.7 | 93.5  | 10.2 | 78.0    | 4.0  | 88.6 | 7.4  | 0.0   | 0.0 |
|                                               |                         |            | 83.0 | 1.4  | 79.0 | 13.8 | 93.5  | 0.0  | 79.5    | 2.1  | 82.0 | 9.4  | 0.0   | 0.0 |

| Parents                                       |                         | Date       | %L1  | SD   | %P   | SD   | %A    | SD   | %L1     | SD   | %P   | SD   | %A   | SD   |
|-----------------------------------------------|-------------------------|------------|------|------|------|------|-------|------|---------|------|------|------|------|------|
| Male                                          | Female                  |            | AMP  |      |      |      |       |      | AMP/TET |      |      |      |      |      |
| <b>DJ694 + DJ1077 + DJ1079 + 2 copies 2.1</b> |                         |            |      |      |      |      |       |      |         |      |      |      |      |      |
| DJ694;2.1+DJ1079(13)                          | UAS-grim;2.1+DJ1077     | 11/20/2007 | 67.0 | 13.2 | 50.4 | 10.9 | 86.7  | 10.8 | 56.0    | 3.3  | 50.4 | 10.1 | 0.0  | 0.0  |
|                                               |                         | 12/11/2007 | 80.0 | 3.3  | 50.0 | 6.8  | 88.5  | 8.6  | 62.0    | 23.2 | 81.0 | 14.1 | 0.0  | 0.0  |
| DJ694;2.1+DJ1077                              | UAS-grim;2.1+DJ1079(13) | 11/27/2007 | 72.0 | 8.6  | 49.1 | 9.8  | 72.5  | 22.2 | 69.0    | 7.6  | 55.6 | 9.6  | 0.0  | 0.0  |
|                                               |                         | 12/18/2007 | 70.0 | 6.9  | 46.6 | 9.1  | 90.8  | 6.7  | 69.0    | 8.2  | 53.4 | 7.9  | 0.0  | 0.0  |
| DJ694;2.1+DJ1079(14)                          | UAS-grim;2.1+DJ1077     | 11/20/2007 | 67.0 | 3.8  | 55.6 | 14.3 | 70.8  | 12.8 | 61.0    | 15.1 | 87.4 | 16.5 | 0.0  | 0.0  |
|                                               |                         | 12/11/2007 | 63.0 | 10.0 | 76.2 | 12.7 | 97.2  | 5.6  | 57.0    | 13.6 | 90.2 | 13.9 | 0.0  | 0.0  |
| DJ694;2.1+DJ1077                              | UAS-grim;2.1+DJ1079(14) | 11/13/2007 | 62.0 | 5.2  | 93.1 | 10.1 | 97.1  | 5.9  | 64.0    | 4.6  | 98.4 | 3.3  | 15.5 | 6.9  |
|                                               |                         | 12/04/2007 | 85.0 | 8.9  | 84.7 | 8.7  | 97.6  | 4.8  | 70.0    | 10.6 | 96.7 | 8.5  | 8.7  | 7.5  |
|                                               |                         |            | 70.8 | 8.1  | 63.2 | 18.5 | 87.7  | 10.7 | 63.5    | 5.5  | 76.6 | 20.2 | 3.0  | 5.9  |
| <b>DJ694 + 2 copies DJ1077 + 2.1 + 3.3</b>    |                         |            |      |      |      |      |       |      |         |      |      |      |      |      |
| DJ694;3.3+DJ1077                              | UAS-grim;2.1+DJ1077     | 11/20/2007 | 63.0 | 14.7 | 96.3 | 7.5  | 96.2  | 4.5  | 64.0    | 7.3  | 85.7 | 17.4 | 0.0  | 0.0  |
|                                               |                         | 12/11/2007 | 82.0 | 6.9  | 74.5 | 10.7 | 100.0 | 0.0  | 71.0    | 13.2 | 78.7 | 11.0 | 0.0  | 0.0  |
| DJ694;2.1+DJ1077                              | UAS-grim;3.3+DJ1077     | 11/20/2007 | 51.0 | 7.6  | 91.2 | 10.4 | 100.0 | 0.0  | 34.0    | 6.9  | 95.0 | 10.0 | 12.9 | 2.6  |
|                                               |                         | 12/11/2007 | 87.0 | 3.8  | 72.3 | 16.3 | 100.0 | 0.0  | 55.0    | 15.1 | 85.4 | 10.7 | 33.2 | 4.9  |
|                                               |                         |            | 70.8 | 16.7 | 83.6 | 12.0 | 99.1  | 1.9  | 56.0    | 16.1 | 86.2 | 6.7  | 11.5 | 15.7 |
| <b>DJ694 + 2 copies DJ1079 + 2 copies 2.1</b> |                         |            |      |      |      |      |       |      |         |      |      |      |      |      |
| DJ694;2.1+DJ1079(13)                          | UAS-grim;2.1+DJ1079(13) | 11/27/2007 | 59.0 | 8.9  | 55.2 | 15.2 | 94.7  | 6.1  | 66.0    | 10.1 | 76.9 | 25.2 | 0.0  | 0.0  |
|                                               |                         | 12/18/2007 | 78.0 | 6.9  | 32.9 | 14.2 | 91.7  | 10.6 | 58.0    | 4.0  | 61.6 | 27.0 | 0.0  | 0.0  |
| DJ694;2.1+DJ1079(14)                          | UAS-grim;2.1+DJ1079(14) | 11/13/2007 | 76.0 | 11.3 | 78.6 | 15.9 | 100.0 | 0.0  | 80.0    | 8.6  | 80.9 | 7.2  | 11.2 | 9.5  |
|                                               |                         | 12/04/2007 | 81.0 | 13.2 | 61.1 | 14.8 | 95.9  | 8.3  | 71.0    | 8.9  | 83.5 | 7.5  | 15.8 | 9.4  |
| DJ694;2.1+DJ1079(14)                          | UAS-grim;2.1+DJ1079(13) | 11/27/2007 | 64.0 | 16.3 | 63.9 | 12.1 | 69.0  | 22.2 | 65.0    | 11.0 | 68.1 | 15.8 | 0.0  | 0.0  |
|                                               |                         | 12/18/2007 | 77.0 | 3.8  | 35.0 | 10.1 | 75.8  | 21.4 | 76.0    | 5.7  | 59.4 | 9.3  | 0.0  | 0.0  |
| DJ694;2.1+DJ1079(13)                          | UAS-grim;2.1+DJ1079(14) | 11/13/2007 | 91.0 | 3.8  | 76.1 | 6.7  | 95.4  | 5.9  | 80.0    | 8.0  | 89.1 | 6.9  | 23.2 | 10.4 |
|                                               |                         | 12/04/2007 | 80.0 | 8.6  | 73.6 | 6.5  | 100.0 | 0.0  | 63.0    | 8.2  | 80.2 | 13.0 | 22.9 | 12.6 |
|                                               |                         |            | 75.8 | 10.0 | 59.5 | 17.7 | 90.3  | 11.5 | 69.9    | 8.2  | 74.9 | 10.8 | 9.1  | 10.5 |
| <b>DJ694 + DJ1077 + DJ1079 + 2.1 + 3.3</b>    |                         |            |      |      |      |      |       |      |         |      |      |      |      |      |
| DJ694;3.3+DJ1077                              | UAS-grim;2.1+DJ1079(13) | 11/27/2007 | 76.0 | 10.8 | 80.9 | 12.7 | 100.0 | 0.0  | 69.0    | 15.1 | 71.0 | 7.9  | 0.0  | 0.0  |
|                                               |                         | 12/18/2007 | 76.0 | 8.6  | 50.8 | 8.9  | 100.0 | 0.0  | 64.0    | 8.6  | 54.0 | 10.5 | 0.0  | 0.0  |
| DJ694;2.1+DJ1079(13)                          | UAS-grim;3.3+DJ1077     | 11/20/2007 | 49.0 | 6.8  | 47.6 | 9.4  | 81.7  | 13.7 | 31.0    | 10.0 | 89.8 | 13.5 | 53.5 | 21.8 |
|                                               |                         | 12/11/2007 | 78.0 | 6.9  | 55.4 | 5.6  | 100.0 | 0.0  | 59.0    | 13.2 | 60.8 | 5.6  | 7.8  | 9.0  |
| DJ694;3.3+DJ1077                              | UAS-grim;2.1+DJ1079(14) | 11/13/2007 | 79.0 | 6.0  | 90.2 | 5.1  | 91.5  | 5.7  | 78.0    | 7.7  | 86.1 | 16.4 | 1.4  | 2.8  |
|                                               |                         | 12/04/2007 | 92.0 | 7.3  | 77.4 | 11.0 | 98.7  | 2.6  | 77.0    | 8.9  | 77.0 | 10.8 | 20.3 | 4.1  |
| DJ694;2.1+DJ1079(14)                          | UAS-grim;3.3+DJ1077     | 11/20/2007 | 54.0 | 12.4 | 63.5 | 18.1 | 97.9  | 4.2  | 48.0    | 5.7  | 79.7 | 23.7 | 29.1 | 5.4  |
|                                               |                         | 12/11/2007 | 81.0 | 6.8  | 49.4 | 5.7  | 100.0 | 0.0  | 42.0    | 10.1 | 67.9 | 25.1 | 22.9 | 20.8 |
| DJ694;2.1+DJ1077                              | UAS-grim;3.3+DJ1079     | 11/13/2007 | 63.0 | 11.5 | 81.0 | 8.4  | 87.3  | 14.9 | 64.0    | 8.6  | 83.7 | 13.7 | 22.8 | 13.4 |
|                                               |                         | 12/04/2007 | 74.0 | 6.9  | 88.4 | 8.6  | 96.7  | 6.7  | 64.0    | 7.3  | 92.6 | 7.4  | 32.1 | 7.1  |
|                                               |                         |            | 72.2 | 13.1 | 68.5 | 16.9 | 95.4  | 6.4  | 59.6    | 15.1 | 76.3 | 12.7 | 19.0 | 17.2 |
| <b>DJ694 + 2 copies DJ1077 + 2 copies 3.3</b> |                         |            |      |      |      |      |       |      |         |      |      |      |      |      |
| DJ694;3.3+DJ1077                              | UAS-grim;3.3+DJ1077     | 11/20/2007 | 52.0 | 7.3  | 82.9 | 20.3 | 100.0 | 0.0  | 56.0    | 9.8  | 73.7 | 17.3 | 56.6 | 25.5 |
|                                               |                         | 12/11/2007 | 81.0 | 7.6  | 58.7 | 17.3 | 98.4  | 3.3  | 60.0    | 7.3  | 75.3 | 3.5  | 22.5 | 11.6 |
|                                               |                         |            | 66.5 | 20.5 | 70.8 | 17.1 | 99.2  | 1.2  | 58.0    | 2.8  | 74.5 | 1.1  | 39.5 | 24.1 |
| <b>DJ694 + 2 copies DJ1079 + 2.1 + 3.3</b>    |                         |            |      |      |      |      |       |      |         |      |      |      |      |      |
| DJ694;2.1+DJ1079(13)                          | UAS-grim;3.3+DJ1079     | 11/13/2007 | 78.0 | 12.0 | 41.3 | 5.8  | 81.8  | 10.2 | 83.0    | 5.0  | 51.4 | 22.0 | 33.6 | 38.5 |
|                                               |                         | 12/04/2007 | 69.0 | 10.5 | 78.5 | 5.9  | 97.8  | 4.5  | 69.0    | 2.0  | 88.5 | 12.6 | 7.2  | 8.4  |
| DJ694;2.1+DJ1079(14)                          | UAS-grim;3.3+DJ1079     | 11/13/2007 | 59.0 | 8.2  | 91.3 | 11.0 | 86.6  | 11.7 | 56.0    | 17.0 | 74.6 | 17.4 | 27.3 | 27.4 |
|                                               |                         | 12/04/2007 | 59.0 | 8.2  | 59.4 | 11.2 | 90.2  | 6.6  | 53.0    | 11.0 | 65.7 | 5.9  | 20.8 | 12.0 |
|                                               |                         |            | 66.3 | 9.1  | 67.6 | 21.9 | 89.1  | 6.7  | 65.3    | 13.7 | 70.0 | 15.6 | 22.2 | 11.3 |
| <b>DJ694 + DJ1077 + DJ1079 + 2 copies 3.3</b> |                         |            |      |      |      |      |       |      |         |      |      |      |      |      |
| DJ694;3.3+DJ1077                              | UAS-grim;3.3+DJ1079     | 11/13/2007 | 58.0 | 10.1 | 98.4 | 3.3  | 93.5  | 5.5  | 59.0    | 10.5 | 74.1 | 12.6 | 31.9 | 15.8 |
|                                               |                         | 12/04/2007 | 62.0 | 5.2  | 80.0 | 13.0 | 100.0 | 0.0  | 61.0    | 7.6  | 84.0 | 7.2  | 13.9 | 4.4  |
|                                               |                         |            | 60.0 | 2.8  | 89.2 | 13.0 | 96.7  | 4.6  | 60.0    | 1.4  | 79.0 | 7.0  | 22.9 | 12.7 |

*Supplemental Table 2: UAS-grim lethality assay statistical analysis (t-tests).*

|                                               |            | hatching |          | pupation |          | eclosion |          |
|-----------------------------------------------|------------|----------|----------|----------|----------|----------|----------|
|                                               |            | -tet     | +tet     | -tet     | +tet     | -tet     | +tet     |
| <b>1 copy DJ146</b>                           |            |          |          |          |          |          |          |
| <b>w1118;UAS-grim/+ compared to:</b>          |            |          |          |          |          |          |          |
| w1118;UAS-grim/+                              | ;DJ1077 /+ | 8.41E-01 | UD       | 2.29E-01 | UD       | 7.88E-01 | UD       |
| ""                                            | ;DJ1078 /+ | 5.84E-01 | UD       | 6.33E-01 | UD       | 1.66E-01 | UD       |
| ""                                            | ;DJ1079 /+ | 1.40E-01 | UD       | 1.51E-01 | UD       | 9.33E-01 | UD       |
| ""                                            | ;DJ1080 /+ | 8.59E-01 | UD       | 8.33E-01 | UD       | 3.09E-01 | UD       |
| ""                                            | ;DJ1081 /+ | 6.04E-01 | UD       | 6.51E-01 | UD       | 9.68E-01 | UD       |
| ""                                            | ;DJ1083 /+ | 3.72E-01 | UD       | 2.20E-01 | UD       | 2.65E-01 | UD       |
| <b>w1118;UAS-grim/+ compared to:</b>          |            |          |          |          |          |          |          |
| DJ694/ UAS-grim                               | ;DJ1077 /+ | 1.85E-07 | 1.28E-06 | 9.53E-08 | 5.76E-24 | 8.59E-40 | 3.27E-37 |
| ""                                            | ;DJ1078 /+ | 4.08E-07 | 6.83E-04 | 2.43E-09 | 3.34E-19 | 1.72E-36 | 2.61E-18 |
| ""                                            | ;DJ1079 /+ | 1.45E-05 | 4.13E-03 | 1.03E-07 | 1.37E-19 | 1.11E-37 | 8.78E-39 |
| ""                                            | ;DJ1080 /+ | 8.37E-05 | 1.18E-04 | 4.31E-09 | 6.22E-20 | 1.11E-37 | 8.78E-39 |
| ""                                            | ;DJ1081 /+ | 1.17E-07 | 7.36E-07 | 1.69E-15 | 8.27E-16 | 2.28E-12 | 1.43E-04 |
| ""                                            | ;DJ1083 /+ | 7.35E-05 | 6.17E-04 | 1.30E-07 | 3.43E-17 | 3.99E-34 | 3.11E-35 |
| <b>DJ694/ UAS-grim compared to:</b>           |            |          |          |          |          |          |          |
| DJ694/ UAS-grim                               | ;DJ1077 /+ | 9.62E-02 | 2.44E-01 | 1.92E-23 | 8.40E-04 | 1.62E-03 | 7.29E-03 |
| ""                                            | ;DJ1078 /+ | 2.82E-01 | 2.31E-02 | 1.59E-14 | 4.11E-18 | 1.97E-04 | 3.03E-04 |
| ""                                            | ;DJ1079 /+ | 6.48E-02 | 1.07E-02 | 2.42E-05 | 3.03E-04 | ~ 1      | ~ 1      |
| ""                                            | ;DJ1080 /+ | 1.09E-02 | 4.06E-02 | 3.14E-14 | 3.03E-04 | ~ 1      | ~ 1      |
| ""                                            | ;DJ1081 /+ | 4.90E-01 | 7.52E-01 | 4.71E-25 | 6.72E-22 | 5.43E-19 | 3.23E-23 |
| ""                                            | ;DJ1083 /+ | 4.80E-02 | 7.90E-02 | 4.52E-11 | ~ 1      | ~ 1      | ~ 1      |
| <b>DJ694/ UAS-grim; DJ1077/+ compared to:</b> |            |          |          |          |          |          |          |
| DJ694/ UAS-grim                               | ;DJ1078 /+ | 8.70E-01 | 4.22E-01 | 3.38E-01 | 1.38E-02 | 9.03E-01 | 3.17E-01 |
| ""                                            | ;DJ1079 /+ | 7.33E-01 | 3.30E-01 | 2.52E-01 | 5.32E-01 | 4.19E-01 | 4.82E-01 |
| ""                                            | ;DJ1080 /+ | 3.78E-01 | 5.04E-01 | 3.54E-01 | 4.90E-01 | 4.19E-01 | 4.82E-01 |
| ""                                            | ;DJ1081 /+ | 7.70E-01 | 7.72E-01 | 5.61E-02 | 3.18E-03 | 3.59E-03 | 7.49E-04 |
| ""                                            | ;DJ1083 /+ | 5.29E-01 | 5.56E-01 | 4.11E-01 | 4.79E-01 | 5.20E-01 | 5.76E-01 |
| <b>DJ694/ UAS-grim; DJ1078/+ compared to:</b> |            |          |          |          |          |          |          |
| DJ694/ UAS-grim                               | ;DJ1079 /+ | 6.74E-01 | 8.07E-01 | 7.05E-01 | 2.31E-01 | 3.74E-01 | 3.74E-01 |
| ""                                            | ;DJ1080 /+ | 3.60E-01 | 8.32E-01 | 9.88E-01 | 1.71E-02 | 3.74E-01 | 3.74E-01 |
| ""                                            | ;DJ1081 /+ | 9.05E-01 | 3.04E-01 | 4.23E-01 | 1.48E-01 | 3.21E-02 | 6.87E-02 |
| ""                                            | ;DJ1083 /+ | 5.04E-01 | 8.75E-01 | 9.58E-01 | 4.96E-02 | 4.95E-01 | 4.95E-01 |
| <b>DJ694/ UAS-grim; DJ1079/+ compared to:</b> |            |          |          |          |          |          |          |
| DJ694/ UAS-grim                               | ;DJ1080 /+ | 6.16E-01 | 6.45E-01 | 7.00E-01 | 4.20E-01 | ~ 1      | ~ 1      |
| ""                                            | ;DJ1081 /+ | 6.07E-01 | 2.52E-01 | 8.81E-01 | 8.18E-02 | 2.87E-02 | 1.01E-02 |
| ""                                            | ;DJ1083 /+ | 7.56E-01 | 6.95E-01 | 8.03E-01 | 4.95E-01 | ~ 1      | ~ 1      |
| <b>DJ694/ UAS-grim; DJ1080/+ compared to:</b> |            |          |          |          |          |          |          |
| DJ694/ UAS-grim                               | ;DJ1081 /+ | 2.78E-01 | 3.39E-01 | 4.27E-01 | 1.42E-02 | 2.87E-02 | 1.01E-02 |
| ""                                            | ;DJ1083 /+ | 8.11E-01 | 9.60E-01 | 9.50E-01 | 4.95E-01 | ~ 1      | ~ 1      |



|                                               |                | hatching |          | pupation |          | eclosion |          |
|-----------------------------------------------|----------------|----------|----------|----------|----------|----------|----------|
|                                               |                | -tet     | +tet     | -tet     | +tet     | -tet     | +tet     |
| <b>DJ694/ UAS-grim; DJ1081/+ compared to:</b> |                |          |          |          |          |          |          |
| DJ694/ UAS-grim                               | ;DJ1083 /+     | 4.04E-01 | 3.90E-01 | 6.04E-01 | 5.87E-02 | 9.80E-02 | 4.93E-02 |
| <b>1 copy DJ147</b>                           |                |          |          |          |          |          |          |
| <b>w1118;UAS-grim/+ compared to:</b>          |                |          |          |          |          |          |          |
| w1118; UAS-grim/+ <b>OR</b>                   |                |          |          |          |          |          |          |
| w1118; DJ694/+                                | ;2.1 /+        | 5.93E-04 | 7.73E-03 | 5.10E-01 | 2.48E-01 | 2.90E-01 | 8.79E-02 |
| ""                                            | ;3.2 /+        | 4.16E-04 | 4.57E-05 | 7.39E-04 | 3.13E-02 | 1.20E-01 | 3.83E-01 |
| ""                                            | ;3.3 /+        | 5.44E-05 | 2.67E-02 | 1.43E-02 | 5.46E-01 | 3.33E-03 | 8.07E-02 |
| <b>w1118;UAS-grim/+ compared to:</b>          |                |          |          |          |          |          |          |
| DJ694/ UAS-grim                               | ;2.1 /+        | 2.52E-07 | 1.21E-07 | 1.10E-15 | 8.75E-19 | 7.76E-42 | 9.75E-42 |
| ""                                            | ;3.2 /+        | 1.92E-06 | 5.67E-07 | 4.61E-23 | 5.20E-22 | 7.76E-42 | 9.75E-42 |
| ""                                            | ;3.3 /+        | 3.23E-11 | 1.26E-11 | 4.76E-20 | 2.47E-21 | 9.31E-42 | 8.04E-47 |
| <b>DJ694/ UAS-grim compared to:</b>           |                |          |          |          |          |          |          |
| DJ694/ UAS-grim                               | ;2.1 /+        | 9.94E-01 | 8.45E-01 | 1.78E-05 | 8.46E-06 | ~ 1      | ~ 1      |
| ""                                            | ;3.2 /+        | 1.08E-01 | 2.96E-01 | 5.05E-20 | 3.03E-04 | ~ 1      | ~ 1      |
| ""                                            | ;3.3 /+        | 9.42E-01 | 1.93E-01 | 2.52E-05 | 1.58E-03 | 1.24E-02 | ~ 1      |
| ""                                            | ;4 /+          | 1.08E-02 | 4.93E-02 | 1.67E-14 | 2.34E-06 | ~ 1      | ~ 1      |
| <b>DJ694/ UAS-grim; 2.1/+ compared to:</b>    |                |          |          |          |          |          |          |
| DJ694/ UAS-grim                               | ;3.2 /+        | 5.24E-01 | 6.54E-01 | 7.75E-01 | 2.99E-01 | ~ 1      | ~ 1      |
| ""                                            | ;3.3 /+        | 9.73E-01 | 4.67E-01 | 7.57E-01 | 7.46E-01 | 4.47E-01 | ~ 1      |
| ""                                            | ;4 /+          | 3.05E-01 | 3.42E-01 | 5.95E-01 | 5.47E-01 | ~ 1      | ~ 1      |
| <b>DJ694/ UAS-grim; 3.2/+ compared to:</b>    |                |          |          |          |          |          |          |
| DJ694/ UAS-grim                               | ;3.3 /+        | 3.29E-01 | 2.27E-01 | 9.90E-01 | 4.76E-01 | 5.16E-01 | ~ 1      |
| ""                                            | ;4 /+          | 5.33E-01 | 4.76E-01 | 2.72E-01 | 5.07E-01 | ~ 1      | ~ 1      |
| <b>DJ694/ UAS-grim; 3.3/+ compared to:</b>    |                |          |          |          |          |          |          |
| DJ694/ UAS-grim                               | ;4 /+          | 1.03E-01 | 1.01E-01 | 6.57E-01 | 7.30E-01 | 6.04E-01 | ~ 1      |
| <b>2 copies DJ146</b>                         |                |          |          |          |          |          |          |
| <b>w1118;UAS-grim/+ compared to:</b>          |                |          |          |          |          |          |          |
| w1118; UAS-grim/+ <b>OR</b>                   |                |          |          |          |          |          |          |
| w1118; DJ694/+                                | ;DJ1077/DJ1080 | 3.97E-01 | 3.29E-02 | 3.83E-01 | 6.55E-01 | 1.59E-01 | 1.72E-01 |
| ""                                            | ;DJ1077/DJ1083 | 7.24E-01 | 5.49E-01 | 6.00E-01 | 1.19E-01 | 2.84E-01 | 7.34E-01 |
| ""                                            | ;DJ1080/DJ1083 | 3.53E-02 | 3.33E-03 | 2.41E-02 | 6.18E-02 | 9.15E-02 | 9.02E-01 |
| ""                                            | ;DJ1079/DJ180  | 3.75E-01 | 8.92E-01 | 7.76E-01 | 7.50E-01 | 3.16E-01 | 5.62E-01 |
| <b>w1118;UAS-grim/+ compared to:</b>          |                |          |          |          |          |          |          |
| DJ694/ UAS-grim                               | ;DJ1077/DJ1077 | 8.43E-03 | 1.07E-04 | 7.78E-05 | 1.36E-05 | 5.93E-10 | 8.78E-39 |
| ""                                            | ;DJ1077/DJ1078 | 6.15E-01 | 7.96E-01 | 7.29E-04 | 4.87E-07 | 4.06E-35 | 3.11E-35 |
| ""                                            | ;DJ1078/DJ1078 | UD       | UD       | UD       | UD       | UD       | UD       |
| ""                                            | ;DJ1077/DJ1079 | 2.71E-01 | 2.91E-01 | 9.16E-05 | 1.60E-05 | 1.51E-11 | 8.78E-39 |
| ""                                            | ;DJ1078/DJ1079 | 8.52E-01 | 6.06E-01 | 6.83E-08 | 3.96E-11 | 3.33E-35 | 3.11E-35 |
| ""                                            | ;DJ1077/DJ1080 | 9.24E-03 | 2.70E-03 | 8.95E-08 | 8.97E-12 | 2.99E-21 | 8.04E-47 |

|    |                | hatching |          | pupation |          | eclosion |          |
|----|----------------|----------|----------|----------|----------|----------|----------|
|    |                | -tet     | +tet     | -tet     | +tet     | -tet     | +tet     |
| "" | ;DJ1078/DJ1080 | 4.50E-01 | 5.20E-01 | 3.71E-05 | 8.99E-14 | 3.33E-35 | 3.11E-35 |
| "" | ;DJ1077/DJ1081 | UD       | UD       | UD       | UD       | UD       | UD       |
| "" | ;DJ1078/DJ1081 | UD       | UD       | UD       | UD       | UD       | UD       |
| "" | ;DJ1077/DJ1083 | 4.32E-08 | 4.89E-06 | 2.49E-08 | 7.54E-22 | 1.57E-24 | 9.75E-42 |
| "" | ;DJ1078/DJ1083 | UD       | UD       | UD       | UD       | UD       | UD       |
| "" | ;DJ1079/DJ1079 | UD       | UD       | UD       | UD       | UD       | UD       |
| "" | ;DJ1079/DJ1080 | 5.07E-01 | 9.75E-03 | 6.37E-05 | 2.84E-10 | 2.78E-20 | 1.06E-07 |
| "" | ;DJ1080/DJ1080 | 8.86E-02 | 7.95E-02 | 2.96E-02 | 1.35E-13 | 1.57E-33 | 3.11E-35 |
| "" | ;DJ1079/DJ1081 | UD       | UD       | UD       | UD       | UD       | UD       |
| "" | ;DJ1080/DJ1081 | UD       | UD       | UD       | UD       | UD       | UD       |
| "" | ;DJ1079/DJ1083 | UD       | UD       | UD       | UD       | UD       | UD       |
| "" | ;DJ1080/DJ1083 | 2.55E-08 | 9.16E-06 | 1.06E-08 | 3.43E-22 | 3.33E-39 | 9.75E-42 |

**DJ694/ UAS-grim compared to:**

|                 |                |          |          |          |          |          |          |
|-----------------|----------------|----------|----------|----------|----------|----------|----------|
| DJ694/ UAS-grim | ;DJ1077/DJ1077 | 1.77E-03 | 7.89E-01 | 3.82E-34 | 2.22E-09 | 3.38E-09 | ~ 1      |
| ""              | ;DJ1077/DJ1078 | 6.85E-04 | 1.65E-03 | 1.79E-49 | 8.74E-51 | 1.14E-06 | ~ 1      |
| ""              | ;DJ1078/DJ1078 | UD       | UD       | UD       | UD       | UD       | UD       |
| ""              | ;DJ1077/DJ1079 | 4.46E-04 | 5.47E-04 | 2.51E-25 | 2.75E-10 | 1.97E-04 | ~ 1      |
| ""              | ;DJ1078/DJ1079 | 1.33E-03 | 2.38E-03 | 4.45E-15 | 1.44E-06 | ~ 1      | ~ 1      |
| ""              | ;DJ1077/DJ1080 | 4.42E-04 | 2.20E-04 | 8.01E-26 | 1.63E-11 | 5.50E-06 | ~ 1      |
| ""              | ;DJ1078/DJ1080 | 5.35E-04 | 2.57E-03 | 4.10E-34 | 9.88E-09 | ~ 1      | ~ 1      |
| ""              | ;DJ1077/DJ1081 | UD       | UD       | UD       | UD       | UD       | UD       |
| ""              | ;DJ1078/DJ1081 | UD       | UD       | UD       | UD       | UD       | UD       |
| ""              | ;DJ1077/DJ1083 | 6.74E-01 | 5.46E-01 | 2.51E-12 | 5.10E-06 | 3.41E-05 | ~ 1      |
| ""              | ;DJ1078/DJ1083 | UD       | UD       | UD       | UD       | UD       | UD       |
| ""              | ;DJ1079/DJ1079 | UD       | UD       | UD       | UD       | UD       | UD       |
| ""              | ;DJ1079/DJ1080 | 2.04E-04 | 5.17E-03 | 7.62E-32 | 1.73E-08 | 1.97E-04 | 3.03E-04 |
| ""              | ;DJ1080/DJ1080 | 5.53E-03 | 9.61E-03 | 8.42E-51 | 2.58E-43 | 1.14E-06 | ~ 1      |
| ""              | ;DJ1079/DJ1081 | UD       | UD       | UD       | UD       | UD       | UD       |
| ""              | ;DJ1080/DJ1081 | UD       | UD       | UD       | UD       | UD       | UD       |
| ""              | ;DJ1079/DJ1083 | UD       | UD       | UD       | UD       | UD       | UD       |
| ""              | ;DJ1080/DJ1083 | 9.00E-01 | 3.45E-01 | 4.29E-12 | ~ 1      | 1.71E-03 | ~ 1      |

**DJ694/ UAS-grim; DJ1077/DJ1077 compared to:**

|                 |                |          |          |          |          |          |     |
|-----------------|----------------|----------|----------|----------|----------|----------|-----|
| DJ694/ UAS-grim | ;DJ1077/DJ1078 | 1.02E-01 | 3.69E-01 | 8.64E-01 | 7.89E-01 | 2.49E-01 | ~ 1 |
| ""              | ;DJ1078/DJ1078 | UD       | UD       | UD       | UD       | UD       | UD  |
| ""              | ;DJ1077/DJ1079 | 5.54E-01 | 2.90E-01 | 8.28E-01 | 9.57E-01 | 6.48E-01 | ~ 1 |
| ""              | ;DJ1078/DJ1079 | 2.16E-01 | 3.88E-01 | 2.86E-01 | 5.13E-01 | 2.45E-01 | ~ 1 |
| ""              | ;DJ1077/DJ1080 | 8.26E-01 | 2.27E-01 | 4.79E-01 | 5.91E-01 | 2.41E-01 | ~ 1 |
| ""              | ;DJ1078/DJ1080 | 2.16E-01 | 3.90E-01 | 2.86E-01 | 3.99E-01 | 2.45E-01 | ~ 1 |
| ""              | ;DJ1077/DJ1081 | UD       | UD       | UD       | UD       | UD       | UD  |
| ""              | ;DJ1078/DJ1081 | UD       | UD       | UD       | UD       | UD       | UD  |

|    |                | hatching |          | pupation |          | eclosion |          |
|----|----------------|----------|----------|----------|----------|----------|----------|
|    |                | -tet     | +tet     | -tet     | +tet     | -tet     | +tet     |
| "" | ;DJ1077/DJ1083 | 1.49E-01 | 9.31E-01 | 2.37E-01 | 7.15E-02 | 2.15E-01 | ~ 1      |
| "" | ;DJ1078/DJ1083 | UD       | UD       | UD       | UD       | UD       | UD       |
| "" | ;DJ1079/DJ1079 | UD       | UD       | UD       | UD       | UD       | UD       |
| "" | ;DJ1079/DJ1080 | 1.45E-01 | 4.06E-01 | 9.36E-01 | 5.95E-01 | 3.42E-01 | 3.74E-01 |
| "" | ;DJ1080/DJ1080 | 6.94E-01 | 4.66E-01 | 4.59E-01 | 5.09E-01 | 2.76E-01 | ~ 1      |
| "" | ;DJ1079/DJ1081 | UD       | UD       | UD       | UD       | UD       | UD       |
| "" | ;DJ1080/DJ1081 | UD       | UD       | UD       | UD       | UD       | UD       |
| "" | ;DJ1079/DJ1083 | UD       | UD       | UD       | UD       | UD       | UD       |
| "" | ;DJ1080/DJ1083 | 1.38E-01 | 8.46E-01 | 2.12E-01 | 6.35E-02 | 8.80E-02 | ~ 1      |

**DJ694/ UAS-grim; DJ1077/DJ1078 compared to:**

|                 |                |          |          |          |          |          |          |
|-----------------|----------------|----------|----------|----------|----------|----------|----------|
| DJ694/ UAS-grim | ;DJ1078/DJ1078 | UD       | UD       | UD       | UD       | UD       | UD       |
| ""              | ;DJ1077/DJ1079 | 5.63E-01 | 6.98E-01 | 7.71E-01 | 8.23E-01 | 5.02E-01 | ~ 1      |
| ""              | ;DJ1078/DJ1079 | 6.33E-01 | 8.92E-01 | 3.70E-01 | 2.45E-01 | 4.23E-01 | ~ 1      |
| ""              | ;DJ1077/DJ1080 | 4.30E-01 | 3.33E-01 | 4.66E-01 | 2.79E-01 | 3.27E-01 | ~ 1      |
| ""              | ;DJ1078/DJ1080 | 7.64E-01 | 7.61E-01 | 6.06E-01 | 7.99E-02 | 4.23E-01 | ~ 1      |
| ""              | ;DJ1077/DJ1081 | UD       | UD       | UD       | UD       | UD       | UD       |
| ""              | ;DJ1078/DJ1081 | UD       | UD       | UD       | UD       | UD       | UD       |
| ""              | ;DJ1077/DJ1083 | 1.30E-01 | 2.22E-01 | 3.07E-01 | 1.20E-05 | 4.23E-01 | ~ 1      |
| ""              | ;DJ1078/DJ1083 | UD       | UD       | UD       | UD       | UD       | UD       |
| ""              | ;DJ1079/DJ1079 | UD       | UD       | UD       | UD       | UD       | UD       |
| ""              | ;DJ1079/DJ1080 | 2.72E-01 | 3.06E-01 | 8.19E-01 | 3.22E-01 | 5.08E-01 | 4.95E-01 |
| ""              | ;DJ1080/DJ1080 | 1.97E-01 | 2.62E-01 | 3.41E-01 | 5.61E-03 | 4.83E-01 | ~ 1      |
| ""              | ;DJ1079/DJ1081 | UD       | UD       | UD       | UD       | UD       | UD       |
| ""              | ;DJ1080/DJ1081 | UD       | UD       | UD       | UD       | UD       | UD       |
| ""              | ;DJ1079/DJ1083 | UD       | UD       | UD       | UD       | UD       | UD       |
| ""              | ;DJ1080/DJ1083 | 1.28E-01 | 2.29E-01 | 2.81E-01 | 1.23E-06 | 6.41E-01 | ~ 1      |

**DJ694/ UAS-grim; DJ1078/DJ1078 compared to:**

|                 |                |    |    |    |    |    |    |
|-----------------|----------------|----|----|----|----|----|----|
| DJ694/ UAS-grim | ;DJ1077/DJ1079 | UD | UD | UD | UD | UD | UD |
| ""              | ;DJ1078/DJ1079 | UD | UD | UD | UD | UD | UD |
| ""              | ;DJ1077/DJ1080 | UD | UD | UD | UD | UD | UD |
| ""              | ;DJ1078/DJ1080 | UD | UD | UD | UD | UD | UD |
| ""              | ;DJ1077/DJ1081 | UD | UD | UD | UD | UD | UD |
| ""              | ;DJ1078/DJ1081 | UD | UD | UD | UD | UD | UD |
| ""              | ;DJ1077/DJ1083 | UD | UD | UD | UD | UD | UD |
| ""              | ;DJ1078/DJ1083 | UD | UD | UD | UD | UD | UD |
| ""              | ;DJ1079/DJ1079 | UD | UD | UD | UD | UD | UD |
| ""              | ;DJ1079/DJ1080 | UD | UD | UD | UD | UD | UD |
| ""              | ;DJ1080/DJ1080 | UD | UD | UD | UD | UD | UD |
| ""              | ;DJ1079/DJ1081 | UD | UD | UD | UD | UD | UD |
| ""              | ;DJ1080/DJ1081 | UD | UD | UD | UD | UD | UD |

|                                                    |                | hatching |          | pupation |          | eclosion |          |
|----------------------------------------------------|----------------|----------|----------|----------|----------|----------|----------|
|                                                    |                | -tet     | +tet     | -tet     | +tet     | -tet     | +tet     |
| ""                                                 | ;DJ1079/DJ1083 | UD       | UD       | UD       | UD       | UD       | UD       |
| ""                                                 | ;DJ1080/DJ1083 | UD       | UD       | UD       | UD       | UD       | UD       |
| <b>DJ694/ UAS-grim; DJ1077/DJ1079 compared to:</b> |                |          |          |          |          |          |          |
| DJ694/ UAS-grim                                    | ;DJ1078/DJ1079 | 7.51E-01 | 8.40E-01 | 4.08E-01 | 4.69E-01 | 4.95E-01 | ~ 1      |
| ""                                                 | ;DJ1077/DJ1080 | 5.83E-01 | 4.20E-01 | 6.90E-01 | 5.24E-01 | 7.08E-01 | ~ 1      |
| ""                                                 | ;DJ1078/DJ1080 | 5.01E-01 | 8.57E-01 | 9.60E-01 | 3.56E-01 | 4.95E-01 | ~ 1      |
| ""                                                 | ;DJ1077/DJ1081 | UD       | UD       | UD       | UD       | UD       | UD       |
| ""                                                 | ;DJ1078/DJ1081 | UD       | UD       | UD       | UD       | UD       | UD       |
| ""                                                 | ;DJ1077/DJ1083 | 1.13E-01 | 1.67E-01 | 3.19E-01 | 5.48E-02 | 5.87E-01 | ~ 1      |
| ""                                                 | ;DJ1078/DJ1083 | UD       | UD       | UD       | UD       | UD       | UD       |
| ""                                                 | ;DJ1079/DJ1079 | UD       | UD       | UD       | UD       | UD       | UD       |
| ""                                                 | ;DJ1079/DJ1080 | 8.02E-01 | 4.06E-01 | 8.80E-01 | 5.45E-01 | 7.06E-01 | 3.74E-01 |
| ""                                                 | ;DJ1080/DJ1080 | 7.91E-01 | 5.63E-01 | 5.23E-01 | 4.58E-01 | 5.48E-01 | ~ 1      |
| ""                                                 | ;DJ1079/DJ1081 | UD       | UD       | UD       | UD       | UD       | UD       |
| ""                                                 | ;DJ1080/DJ1081 | UD       | UD       | UD       | UD       | UD       | UD       |
| ""                                                 | ;DJ1079/DJ1083 | UD       | UD       | UD       | UD       | UD       | UD       |
| ""                                                 | ;DJ1080/DJ1083 | 1.06E-01 | 1.79E-01 | 2.89E-01 | 4.84E-02 | 3.20E-01 | ~ 1      |
| <b>DJ694/ UAS-grim; DJ1078/DJ1079 compared to:</b> |                |          |          |          |          |          |          |
| DJ694/ UAS-grim                                    | ;DJ1077/DJ1080 | 5.20E-01 | 4.08E-01 | 3.69E-01 | 5.19E-01 | 3.15E-01 | ~ 1      |
| ""                                                 | ;DJ1078/DJ1080 | 4.93E-01 | 9.50E-01 | 4.84E-01 | 8.33E-01 | ~ 1      | ~ 1      |
| ""                                                 | ;DJ1077/DJ1081 | UD       | UD       | UD       | UD       | UD       | UD       |
| ""                                                 | ;DJ1078/DJ1081 | UD       | UD       | UD       | UD       | UD       | UD       |
| ""                                                 | ;DJ1077/DJ1083 | 1.53E-01 | 2.42E-01 | 9.46E-01 | 2.02E-01 | 4.06E-01 | ~ 1      |
| ""                                                 | ;DJ1078/DJ1083 | UD       | UD       | UD       | UD       | UD       | UD       |
| ""                                                 | ;DJ1079/DJ1079 | UD       | UD       | UD       | UD       | UD       | UD       |
| ""                                                 | ;DJ1079/DJ1080 | 7.48E-01 | 4.02E-01 | 3.13E-01 | 7.66E-01 | 4.95E-01 | 4.95E-01 |
| ""                                                 | ;DJ1080/DJ1080 | 3.96E-01 | 4.85E-01 | 2.94E-01 | 9.15E-01 | 4.23E-01 | ~ 1      |
| ""                                                 | ;DJ1079/DJ1081 | UD       | UD       | UD       | UD       | UD       | UD       |
| ""                                                 | ;DJ1080/DJ1081 | UD       | UD       | UD       | UD       | UD       | UD       |
| ""                                                 | ;DJ1079/DJ1083 | UD       | UD       | UD       | UD       | UD       | UD       |
| ""                                                 | ;DJ1080/DJ1083 | 2.07E-01 | 2.73E-01 | 7.47E-01 | 2.62E-01 | 5.41E-01 | ~ 1      |
| <b>DJ694/ UAS-grim; DJ1077/DJ1080 compared to:</b> |                |          |          |          |          |          |          |
| DJ694/ UAS-grim                                    | ;DJ1078/DJ1080 | 4.00E-01 | 4.12E-01 | 7.54E-01 | 3.27E-01 | 3.15E-01 | ~ 1      |
| ""                                                 | ;DJ1077/DJ1081 | UD       | UD       | UD       | UD       | UD       | UD       |
| ""                                                 | ;DJ1078/DJ1081 | UD       | UD       | UD       | UD       | UD       | UD       |
| ""                                                 | ;DJ1077/DJ1083 | 1.52E-01 | 1.43E-01 | 2.71E-01 | 2.27E-02 | 6.77E-01 | ~ 1      |
| ""                                                 | ;DJ1078/DJ1083 | UD       | UD       | UD       | UD       | UD       | UD       |
| ""                                                 | ;DJ1079/DJ1079 | UD       | UD       | UD       | UD       | UD       | UD       |
| ""                                                 | ;DJ1079/DJ1080 | 4.77E-01 | 9.92E-01 | 5.34E-01 | 7.87E-01 | 8.25E-01 | 1.70E-01 |
| ""                                                 | ;DJ1080/DJ1080 | 7.60E-01 | 7.71E-01 | 2.61E-01 | 5.45E-01 | 4.09E-01 | ~ 1      |

|                                                    |                | hatching |          | pupation |          | eclosion |          |
|----------------------------------------------------|----------------|----------|----------|----------|----------|----------|----------|
|                                                    |                | -tet     | +tet     | -tet     | +tet     | -tet     | +tet     |
| ""                                                 | ;DJ1079/DJ1081 | UD       | UD       | UD       | UD       | UD       | UD       |
| ""                                                 | ;DJ1080/DJ1081 | UD       | UD       | UD       | UD       | UD       | UD       |
| ""                                                 | ;DJ1079/DJ1083 | UD       | UD       | UD       | UD       | UD       | UD       |
| ""                                                 | ;DJ1080/DJ1083 | 1.27E-01 | 1.76E-01 | 2.35E-01 | 1.78E-02 | 1.94E-01 | ~ 1      |
| <b>DJ694/ UAS-grim; DJ1078/DJ1080 compared to:</b> |                |          |          |          |          |          |          |
| DJ694/ UAS-grim                                    | ;DJ1077/DJ1081 | UD       | UD       | UD       | UD       | UD       | UD       |
| ""                                                 | ;DJ1078/DJ1081 | UD       | UD       | UD       | UD       | UD       | UD       |
| ""                                                 | ;DJ1077/DJ1083 | 1.23E-01 | 2.42E-01 | 4.10E-01 | 1.34E-01 | 4.06E-01 | ~ 1      |
| ""                                                 | ;DJ1078/DJ1083 | UD       | UD       | UD       | UD       | UD       | UD       |
| ""                                                 | ;DJ1079/DJ1079 | UD       | UD       | UD       | UD       | UD       | UD       |
| ""                                                 | ;DJ1079/DJ1080 | 1.54E-01 | 3.56E-01 | 8.12E-01 | 5.79E-01 | 4.95E-01 | 4.95E-01 |
| ""                                                 | ;DJ1080/DJ1080 | 1.44E-01 | 1.50E-01 | 3.37E-01 | 5.60E-01 | 4.23E-01 | ~ 1      |
| ""                                                 | ;DJ1079/DJ1081 | UD       | UD       | UD       | UD       | UD       | UD       |
| ""                                                 | ;DJ1080/DJ1081 | UD       | UD       | UD       | UD       | UD       | UD       |
| ""                                                 | ;DJ1079/DJ1083 | UD       | UD       | UD       | UD       | UD       | UD       |
| ""                                                 | ;DJ1080/DJ1083 | 1.21E-01 | 2.52E-01 | 3.79E-01 | 9.61E-02 | 5.41E-01 | ~ 1      |
| <b>DJ694/ UAS-grim; DJ1077/DJ1081 compared to:</b> |                |          |          |          |          |          |          |
| DJ694/ UAS-grim                                    | ;DJ1078/DJ1081 | UD       | UD       | UD       | UD       | UD       | UD       |
| ""                                                 | ;DJ1077/DJ1083 | UD       | UD       | UD       | UD       | UD       | UD       |
| ""                                                 | ;DJ1078/DJ1083 | UD       | UD       | UD       | UD       | UD       | UD       |
| ""                                                 | ;DJ1079/DJ1079 | UD       | UD       | UD       | UD       | UD       | UD       |
| ""                                                 | ;DJ1079/DJ1080 | UD       | UD       | UD       | UD       | UD       | UD       |
| ""                                                 | ;DJ1080/DJ1080 | UD       | UD       | UD       | UD       | UD       | UD       |
| ""                                                 | ;DJ1079/DJ1081 | UD       | UD       | UD       | UD       | UD       | UD       |
| ""                                                 | ;DJ1080/DJ1081 | UD       | UD       | UD       | UD       | UD       | UD       |
| ""                                                 | ;DJ1079/DJ1083 | UD       | UD       | UD       | UD       | UD       | UD       |
| ""                                                 | ;DJ1080/DJ1083 | UD       | UD       | UD       | UD       | UD       | UD       |
| <b>DJ694/ UAS-grim; DJ1078/DJ1081 compared to:</b> |                |          |          |          |          |          |          |
| DJ694/ UAS-grim                                    | ;DJ1077/DJ1083 | UD       | UD       | UD       | UD       | UD       | UD       |
| ""                                                 | ;DJ1078/DJ1083 | UD       | UD       | UD       | UD       | UD       | UD       |
| ""                                                 | ;DJ1079/DJ1079 | UD       | UD       | UD       | UD       | UD       | UD       |
| ""                                                 | ;DJ1079/DJ1080 | UD       | UD       | UD       | UD       | UD       | UD       |
| ""                                                 | ;DJ1080/DJ1080 | UD       | UD       | UD       | UD       | UD       | UD       |
| ""                                                 | ;DJ1079/DJ1081 | UD       | UD       | UD       | UD       | UD       | UD       |
| ""                                                 | ;DJ1080/DJ1081 | UD       | UD       | UD       | UD       | UD       | UD       |
| ""                                                 | ;DJ1079/DJ1083 | UD       | UD       | UD       | UD       | UD       | UD       |
| ""                                                 | ;DJ1080/DJ1083 | UD       | UD       | UD       | UD       | UD       | UD       |
| <b>DJ694/ UAS-grim; DJ1077/DJ1083 compared to:</b> |                |          |          |          |          |          |          |
| DJ694/ UAS-grim                                    | ;DJ1078/DJ1083 | UD       | UD       | UD       | UD       | UD       | UD       |
| ""                                                 | ;DJ1079/DJ1079 | UD       | UD       | UD       | UD       | UD       | UD       |

|                                                    |                | hatching |          | pupation |          | eclosion |          |
|----------------------------------------------------|----------------|----------|----------|----------|----------|----------|----------|
|                                                    |                | -tet     | +tet     | -tet     | +tet     | -tet     | +tet     |
| ""                                                 | ;DJ1079/DJ1080 | 8.38E-02 | 2.86E-01 | 2.56E-01 | 9.83E-02 | 9.04E-01 | 2.86E-01 |
| ""                                                 | ;DJ1080/DJ1080 | 2.16E-01 | 3.26E-01 | 2.29E-01 | 2.78E-04 | 5.43E-01 | ~ 1      |
| ""                                                 | ;DJ1079/DJ1081 | UD       | UD       | UD       | UD       | UD       | UD       |
| ""                                                 | ;DJ1080/DJ1081 | UD       | UD       | UD       | UD       | UD       | UD       |
| ""                                                 | ;DJ1079/DJ1083 | UD       | UD       | UD       | UD       | UD       | UD       |
| ""                                                 | ;DJ1080/DJ1083 | 8.97E-01 | 8.88E-01 | 9.51E-01 | 1.53E-01 | 2.95E-01 | ~ 1      |
| <b>DJ694/ UAS-grim; DJ1078/DJ1083 compared to:</b> |                |          |          |          |          |          |          |
| DJ694/ UAS-grim                                    | ;DJ1079/DJ1079 | UD       | UD       | UD       | UD       | UD       | UD       |
| ""                                                 | ;DJ1079/DJ1080 | UD       | UD       | UD       | UD       | UD       | UD       |
| ""                                                 | ;DJ1080/DJ1080 | UD       | UD       | UD       | UD       | UD       | UD       |
| ""                                                 | ;DJ1079/DJ1081 | UD       | UD       | UD       | UD       | UD       | UD       |
| ""                                                 | ;DJ1080/DJ1081 | UD       | UD       | UD       | UD       | UD       | UD       |
| ""                                                 | ;DJ1079/DJ1083 | UD       | UD       | UD       | UD       | UD       | UD       |
| ""                                                 | ;DJ1080/DJ1083 | UD       | UD       | UD       | UD       | UD       | UD       |
| <b>DJ694/ UAS-grim; DJ1079/DJ1079 compared to:</b> |                |          |          |          |          |          |          |
| DJ694/ UAS-grim                                    | ;DJ1079/DJ1080 | UD       | UD       | UD       | UD       | UD       | UD       |
| ""                                                 | ;DJ1080/DJ1080 | UD       | UD       | UD       | UD       | UD       | UD       |
| ""                                                 | ;DJ1079/DJ1081 | UD       | UD       | UD       | UD       | UD       | UD       |
| ""                                                 | ;DJ1080/DJ1081 | UD       | UD       | UD       | UD       | UD       | UD       |
| ""                                                 | ;DJ1079/DJ1083 | UD       | UD       | UD       | UD       | UD       | UD       |
| ""                                                 | ;DJ1080/DJ1083 | UD       | UD       | UD       | UD       | UD       | UD       |
| <b>DJ694/ UAS-grim; DJ1079/DJ1080 compared to:</b> |                |          |          |          |          |          |          |
| DJ694/ UAS-grim                                    | ;DJ1080/DJ1080 | 3.01E-01 | 7.22E-01 | 4.66E-01 | 7.94E-01 | 5.99E-01 | 4.95E-01 |
| ""                                                 | ;DJ1079/DJ1081 | UD       | UD       | UD       | UD       | UD       | UD       |
| ""                                                 | ;DJ1080/DJ1081 | UD       | UD       | UD       | UD       | UD       | UD       |
| ""                                                 | ;DJ1079/DJ1083 | UD       | UD       | UD       | UD       | UD       | UD       |
| ""                                                 | ;DJ1080/DJ1083 | 8.03E-02 | 3.18E-01 | 2.29E-01 | 8.26E-02 | 3.56E-01 | 2.86E-01 |
| <b>DJ694/ UAS-grim; DJ1080/DJ1080 compared to:</b> |                |          |          |          |          |          |          |
| DJ694/ UAS-grim                                    | ;DJ1079/DJ1081 | UD       | UD       | UD       | UD       | UD       | UD       |
| ""                                                 | ;DJ1080/DJ1081 | UD       | UD       | UD       | UD       | UD       | UD       |
| ""                                                 | ;DJ1079/DJ1083 | UD       | UD       | UD       | UD       | UD       | UD       |
| ""                                                 | ;DJ1080/DJ1083 | 2.06E-01 | 3.47E-01 | 2.09E-01 | 9.28E-06 | 7.03E-01 | ~ 1      |
| <b>DJ694/ UAS-grim; DJ1079/DJ1081 compared to:</b> |                |          |          |          |          |          |          |
| DJ694/ UAS-grim                                    | ;DJ1080/DJ1081 | UD       | UD       | UD       | UD       | UD       | UD       |
| ""                                                 | ;DJ1079/DJ1083 | UD       | UD       | UD       | UD       | UD       | UD       |
| ""                                                 | ;DJ1080/DJ1083 | UD       | UD       | UD       | UD       | UD       | UD       |
| <b>DJ694/ UAS-grim; DJ1080/DJ1081 compared to:</b> |                |          |          |          |          |          |          |
| DJ694/ UAS-grim                                    | ;DJ1079/DJ1083 | UD       | UD       | UD       | UD       | UD       | UD       |
| ""                                                 | ;DJ1080/DJ1083 | UD       | UD       | UD       | UD       | UD       | UD       |
| <b>DJ694/ UAS-grim; DJ1079/DJ1083 compared to:</b> |                |          |          |          |          |          |          |

|                                             |                | hatching |          | pupation |          | eclosion |          |
|---------------------------------------------|----------------|----------|----------|----------|----------|----------|----------|
|                                             |                | -tet     | +tet     | -tet     | +tet     | -tet     | +tet     |
| DJ694/ UAS-grim                             | ;DJ1080/DJ1083 | UD       | UD       | UD       | UD       | UD       | UD       |
| <b>2 copies DJ147</b>                       |                |          |          |          |          |          |          |
| <b>w1118;UAS-grim/+ compared to:</b>        |                |          |          |          |          |          |          |
| DJ694/ UAS-grim                             | ;2.1/2.1       | 2.74E-02 | 1.13E-01 | 5.25E-01 | 1.93E-03 | 4.08E-16 | 1.59E-40 |
| '''                                         | ;2.1/3.3       | 8.67E-05 | 7.19E-07 | 1.58E-09 | 2.03E-10 | 3.91E-17 | 2.32E-51 |
| '''                                         | ;2.1/3.2       | 4.33E-03 | 2.10E-04 | 1.84E-11 | 6.92E-13 | 8.71E-13 | 2.40E-10 |
| '''                                         | ;3.3/3.3       | 2.42E-12 | 2.53E-09 | 3.99E-12 | 5.01E-12 | 5.66E-18 | 9.75E-42 |
| '''                                         | ;3.2/3.3       | 2.98E-06 | 1.36E-04 | 1.15E-13 | 2.54E-18 | 7.71E-37 | 8.78E-39 |
| '''                                         | ;2.1/4         | 3.90E-03 | 1.70E-02 | 2.46E-13 | 1.94E-13 | 3.33E-35 | 3.11E-35 |
| '''                                         | ;3.3/4         | 7.06E-01 | 5.57E-01 | 2.84E-17 | 3.72E-16 | 3.33E-35 | 3.11E-35 |
| <b>DJ694/UAS-grim compared to:</b>          |                |          |          |          |          |          |          |
| DJ694/ UAS-grim                             | ;2.1/2.1       | 2.73E-04 | 1.85E-04 | 3.41E-59 | 2.68E-38 | 3.36E-15 | 2.33E-03 |
| '''                                         | ;2.1/3.3       | 6.09E-05 | 2.20E-03 | 1.70E-36 | 3.45E-20 | 1.55E-12 | ~ 1      |
| '''                                         | ;2.1/3.2       | 7.65E-04 | 1.56E-02 | 6.33E-31 | 1.00E-33 | 5.98E-04 | 2.33E-03 |
| '''                                         | ;3.3/3.3       | 7.34E-01 | 2.18E-01 | 1.24E-17 | 1.97E-09 | 2.46E-08 | ~ 1      |
| '''                                         | ;3.2/3.3       | 4.25E-02 | 9.17E-02 | 2.31E-36 | 2.99E-36 | 1.97E-04 | ~ 1      |
| '''                                         | ;2.1/4         | 1.77E-02 | 2.23E-02 | 4.22E-26 | 1.08E-68 | ~ 1      | ~ 1      |
| '''                                         | ;3.3/4         | 1.57E-03 | 2.42E-03 | 8.19E-28 | 1.29E-17 | ~ 1      | ~ 1      |
| <b>DJ694/UAS-grim; 2.1/2.1 compared to:</b> |                |          |          |          |          |          |          |
| DJ694/ UAS-grim                             | ;2.1/3.3       | 4.72E-01 | 7.73E-02 | 4.10E-03 | 3.29E-02 | 7.15E-01 | 1.67E-01 |
| '''                                         | ;2.1/3.2       | 7.52E-01 | 2.32E-01 | 1.34E-03 | 1.13E-03 | 4.37E-01 | 3.76E-01 |
| '''                                         | ;3.3/3.3       | 1.38E-02 | 3.93E-03 | 4.67E-03 | 1.14E-02 | 3.72E-01 | 3.56E-01 |
| '''                                         | ;3.2/3.3       | 2.04E-01 | 2.06E-01 | 9.76E-05 | 3.88E-05 | 3.12E-02 | 4.37E-01 |
| '''                                         | ;2.1/4         | 6.33E-01 | 4.43E-01 | 6.79E-04 | 1.10E-03 | 6.69E-02 | 5.41E-01 |
| '''                                         | ;3.3/4         | 5.22E-01 | 6.74E-01 | 2.74E-05 | 3.76E-04 | 6.69E-02 | 5.41E-01 |
| <b>DJ694/UAS-grim; 2.1/3.3 compared to:</b> |                |          |          |          |          |          |          |
| DJ694/ UAS-grim                             | ;2.1/3.2       | 7.06E-01 | 8.55E-01 | 8.29E-02 | 5.53E-01 | 4.55E-01 | 1.67E-01 |
| '''                                         | ;3.3/3.3       | 1.50E-02 | 1.79E-01 | 1.48E-02 | 1.04E-01 | 4.73E-01 | ~ 1      |
| '''                                         | ;3.2/3.3       | 4.45E-01 | 7.90E-01 | 8.63E-03 | 4.70E-03 | 3.55E-02 | ~ 1      |
| '''                                         | ;2.1/4         | 8.99E-01 | 4.55E-01 | 4.64E-03 | 8.78E-02 | 6.53E-02 | ~ 1      |
| '''                                         | ;3.3/4         | 2.70E-01 | 1.01E-01 | 1.90E-04 | 1.10E-02 | 6.53E-02 | ~ 1      |
| <b>DJ694/UAS-grim; 2.1/3.2 compared to:</b> |                |          |          |          |          |          |          |
| DJ694/ UAS-grim                             | ;3.3/3.3       | 2.39E-02 | 2.37E-01 | 3.06E-01 | 2.44E-01 | 8.97E-01 | 3.56E-01 |
| '''                                         | ;3.2/3.3       | 3.25E-01 | 7.69E-01 | 2.57E-01 | 2.96E-04 | 4.39E-01 | 4.37E-01 |
| '''                                         | ;2.1/4         | 8.61E-01 | 6.66E-01 | 1.12E-01 | 1.40E-02 | 5.01E-01 | 5.41E-01 |
| '''                                         | ;3.3/4         | 4.02E-01 | 2.72E-01 | 1.16E-02 | 1.65E-03 | 5.01E-01 | 5.41E-01 |
| <b>DJ694/UAS-grim; 3.3/3.3 compared to:</b> |                |          |          |          |          |          |          |
| DJ694/ UAS-grim                             | ;3.2/3.3       | 1.47E-01 | 5.49E-01 | 7.80E-01 | 2.60E-01 | 1.74E-01 | ~ 1      |
| '''                                         | ;2.1/4         | 6.96E-02 | 2.43E-02 | 7.02E-01 | 8.39E-01 | 2.39E-01 | ~ 1      |
| '''                                         | ;3.3/4         | 2.35E-02 | 2.56E-03 | 1.84E-01 | 2.93E-01 | 2.39E-01 | ~ 1      |



|                                                |           | hatching |          | pupation |          | eclosion |          |
|------------------------------------------------|-----------|----------|----------|----------|----------|----------|----------|
|                                                |           | -tet     | +tet     | -tet     | +tet     | -tet     | +tet     |
| <b>DJ694/UAS-grim; 3.2/3.3 compared to:</b>    |           |          |          |          |          |          |          |
| DJ694/ UAS-grim                                | ;2.1/4    | 4.48E-01 | 5.73E-01 | 2.80E-01 | 7.99E-04 | 4.95E-01 | ~ 1      |
| "                                              | ;3.3/4    | 1.35E-01 | 2.95E-01 | 1.57E-02 | 1.69E-01 | 4.95E-01 | ~ 1      |
| <b>DJ694/UAS-grim; 2.1/4 compared to:</b>      |           |          |          |          |          |          |          |
| DJ694/ UAS-grim                                | ;3.3/4    | 1.66E-01 | 2.63E-01 | 1.78E-01 | 1.92E-02 | ~ 1      | ~ 1      |
| <b>1 copy DJ146 + 1 copy DJ147</b>             |           |          |          |          |          |          |          |
| <b>w1118;UAS-grim/+ compared to:</b>           |           |          |          |          |          |          |          |
| DJ694/ UAS-grim                                | ;3.3/1077 | 1.50E-03 | 2.37E-04 | 6.03E-10 | 5.17E-19 | 2.11E-04 | 9.75E-42 |
| "                                              | ;3.3/1080 | 7.66E-04 | 9.74E-03 | 7.39E-14 | 4.03E-19 | 8.35E-14 | 9.75E-42 |
| "                                              | ;3.3/1083 | 1.57E-02 | 1.39E-04 | 1.04E-06 | 5.59E-13 | 6.32E-29 | 3.11E-35 |
| "                                              | ;3.3/1079 | 3.61E-02 | 1.75E-02 | 7.64E-08 | 6.48E-13 | 6.93E-08 | 8.78E-39 |
| "                                              | ;4/1079   | 4.65E-03 | 4.45E-03 | 1.71E-16 | 1.76E-16 | 3.33E-35 | 3.11E-35 |
| "                                              | ;4/1083   | 3.76E-02 | 2.06E-02 | 2.16E-09 | 2.49E-16 | 3.33E-35 | 3.11E-35 |
| "                                              | ;2.1/1077 | 8.74E-01 | 3.06E-02 | 2.74E-09 | 1.53E-13 | 1.92E-11 | 2.24E-44 |
| "                                              | ;2.1/1080 | 3.41E-01 | 2.24E-01 | 1.16E-11 | 8.20E-16 | 7.63E-23 | 4.37E-44 |
| "                                              | ;2.1/1083 | 3.77E-01 | 8.60E-01 | 3.80E-06 | 1.23E-07 | 5.56E-26 | 3.11E-35 |
| "                                              | ;4/1077   | 1.57E-02 | 3.18E-02 | 9.92E-07 | 1.37E-16 | 9.06E-34 | 3.11E-35 |
| "                                              | ;4/1080   | 6.86E-08 | 4.18E-09 | 3.33E-18 | 5.44E-16 | 3.33E-35 | 3.11E-35 |
| "                                              | ;2.1/1079 | 7.88E-01 | 4.51E-01 | 2.84E-05 | 2.03E-12 | 8.12E-07 | 8.54E-41 |
| <b>DJ694/UAS-grim compared to:</b>             |           |          |          |          |          |          |          |
| DJ694/ UAS-grim                                | ;3.3/1077 | 3.90E-03 | 5.92E-02 | 2.16E-28 | 8.67E-30 | 5.39E-40 | ~ 1      |
| "                                              | ;3.3/1080 | 1.45E-02 | 1.90E-02 | 5.77E-29 | 3.05E-10 | 5.75E-17 | ~ 1      |
| "                                              | ;3.3/1083 | 1.04E-02 | 1.86E-01 | 3.43E-36 | 2.05E-84 | 9.98E-35 | ~ 1      |
| "                                              | ;3.3/1079 | 1.54E-03 | 3.25E-03 | 1.00E-27 | 1.90E-14 | 2.76E-13 | ~ 1      |
| "                                              | ;4/1079   | 1.58E-02 | 3.86E-02 | 3.15E-16 | 2.34E-06 | ~ 1      | ~ 1      |
| "                                              | ;4/1083   | 7.57E-03 | 2.31E-02 | 2.82E-20 | 7.62E-11 | ~ 1      | ~ 1      |
| "                                              | ;2.1/1077 | 1.50E-06 | 6.58E-05 | 6.66E-40 | 2.23E-30 | 4.15E-56 | ~ 1      |
| "                                              | ;2.1/1080 | 6.06E-06 | 1.38E-05 | 6.02E-50 | 3.73E-36 | 2.44E-20 | 7.29E-03 |
| "                                              | ;2.1/1083 | 4.73E-04 | 9.46E-04 | 1.31E-53 | 9.67E-31 | 1.53E-43 | ~ 1      |
| "                                              | ;4/1077   | 1.04E-02 | 1.55E-02 | 1.01E-43 | 2.34E-06 | 1.14E-06 | ~ 1      |
| "                                              | ;4/1080   | 2.46E-01 | 8.91E-01 | 5.97E-26 | 1.90E-37 | ~ 1      | ~ 1      |
| "                                              | ;2.1/1079 | 9.29E-06 | 4.01E-05 | 4.76E-29 | 2.68E-25 | 3.40E-10 | 2.33E-03 |
| <b>DJ694/UAS-grim; 3.3/DJ1077 compared to:</b> |           |          |          |          |          |          |          |
| DJ694/ UAS-grim                                | ;3.3/1080 | 8.24E-01 | 7.90E-01 | 2.68E-01 | 2.25E-01 | 1.76E-02 | ~ 1      |
| "                                              | ;3.3/1083 | 7.65E-01 | 9.39E-01 | 6.53E-01 | 2.29E-02 | 1.43E-03 | ~ 1      |
| "                                              | ;3.3/1079 | 6.53E-01 | 4.61E-01 | 7.85E-01 | 2.33E-01 | 1.39E-01 | ~ 1      |
| "                                              | ;4/1079   | 8.63E-01 | 7.23E-01 | 2.48E-02 | 1.55E-02 | 2.44E-04 | ~ 1      |
| "                                              | ;4/1083   | 6.96E-01 | 6.36E-01 | 4.84E-01 | 1.68E-02 | 2.44E-04 | ~ 1      |
| "                                              | ;2.1/1077 | 1.30E-01 | 2.26E-01 | 2.76E-01 | 4.32E-04 | 5.72E-01 | ~ 1      |
| "                                              | ;2.1/1080 | 2.32E-01 | 1.41E-01 | 4.82E-01 | 1.51E-04 | 3.36E-04 | 4.07E-01 |

|                                                |           | hatching |          | pupation |          | eclosion |          |
|------------------------------------------------|-----------|----------|----------|----------|----------|----------|----------|
|                                                |           | -tet     | +tet     | -tet     | +tet     | -tet     | +tet     |
| ""                                             | ;2.1/1083 | 2.87E-01 | 2.74E-01 | 4.58E-01 | 2.67E-03 | 4.15E-03 | ~ 1      |
| ""                                             | ;4/1077   | 7.65E-01 | 5.68E-01 | 5.93E-01 | 1.12E-02 | 3.13E-04 | ~ 1      |
| ""                                             | ;4/1080   | 4.26E-01 | 3.71E-01 | 1.12E-02 | 1.91E-02 | 2.44E-04 | ~ 1      |
| ""                                             | ;2.1/1079 | 1.70E-01 | 1.58E-01 | 2.65E-01 | 4.40E-03 | 1.58E-01 | 3.56E-01 |
| <b>DJ694/UAS-grim; 3.3/DJ1080 compared to:</b> |           |          |          |          |          |          |          |
| DJ694/ UAS-grim                                | ;3.3/1083 | 6.79E-01 | 7.83E-01 | 1.59E-01 | 8.34E-02 | 3.43E-01 | ~ 1      |
| ""                                             | ;3.3/1079 | 5.62E-01 | 7.37E-01 | 2.19E-01 | 1.25E-01 | 7.44E-01 | ~ 1      |
| ""                                             | ;4/1079   | 7.51E-01 | 9.47E-01 | 3.79E-02 | 3.42E-01 | 4.68E-02 | ~ 1      |
| ""                                             | ;4/1083   | 6.28E-01 | 8.61E-01 | 9.89E-01 | 4.22E-01 | 4.68E-02 | ~ 1      |
| ""                                             | ;2.1/1077 | 1.37E-01 | 5.09E-01 | 1.75E-02 | 6.09E-04 | 7.92E-03 | ~ 1      |
| ""                                             | ;2.1/1080 | 2.14E-01 | 3.70E-01 | 2.13E-02 | 5.82E-04 | 3.58E-01 | 4.07E-01 |
| ""                                             | ;2.1/1083 | 3.13E-01 | 4.75E-01 | 8.23E-02 | 7.87E-03 | 8.52E-01 | ~ 1      |
| ""                                             | ;4/1077   | 6.79E-01 | 8.06E-01 | 1.23E-01 | 3.09E-01 | 5.67E-02 | ~ 1      |
| ""                                             | ;4/1080   | 6.46E-01 | 3.52E-01 | 1.31E-02 | 6.62E-01 | 4.68E-02 | ~ 1      |
| ""                                             | ;2.1/1079 | 1.81E-01 | 3.80E-01 | 4.99E-02 | 4.23E-03 | 8.52E-01 | 3.56E-01 |
| <b>DJ694/UAS-grim; 3.3/DJ1083 compared to:</b> |           |          |          |          |          |          |          |
| DJ694/ UAS-grim                                | ;3.3/1079 | 8.79E-01 | 3.05E-01 | 8.70E-01 | 8.79E-01 | 4.08E-01 | ~ 1      |
| ""                                             | ;4/1079   | 4.23E-01 | 5.84E-01 | 5.63E-02 | 2.90E-02 | 1.36E-02 | ~ 1      |
| ""                                             | ;4/1083   | 9.55E-02 | 5.32E-01 | 4.47E-01 | 2.29E-02 | 1.36E-02 | ~ 1      |
| ""                                             | ;2.1/1077 | 4.78E-03 | 1.04E-01 | 6.77E-01 | 3.08E-02 | 1.29E-05 | ~ 1      |
| ""                                             | ;2.1/1080 | 1.84E-01 | 5.01E-02 | 8.89E-01 | 2.04E-02 | 5.47E-01 | 5.76E-01 |
| ""                                             | ;2.1/1083 | 1.37E-03 | 1.90E-01 | 7.24E-01 | 7.57E-02 | 8.33E-02 | ~ 1      |
| ""                                             | ;4/1077   | ~ 1      | 4.10E-01 | 9.38E-01 | 2.15E-02 | 2.76E-02 | ~ 1      |
| ""                                             | ;4/1080   | 2.67E-02 | 3.10E-01 | 2.23E-02 | 1.60E-03 | 1.36E-02 | ~ 1      |
| ""                                             | ;2.1/1079 | 6.70E-04 | 5.30E-02 | 5.88E-01 | 1.22E-01 | 5.10E-01 | 5.41E-01 |
| <b>DJ694/UAS-grim; 3.3/DJ1079 compared to:</b> |           |          |          |          |          |          |          |
| DJ694/ UAS-grim                                | ;4/1079   | 7.42E-01 | 5.29E-01 | 4.54E-02 | 1.37E-01 | 1.30E-01 | ~ 1      |
| ""                                             | ;4/1083   | 9.88E-01 | 8.19E-01 | 4.56E-01 | 1.51E-01 | 1.30E-01 | ~ 1      |
| ""                                             | ;2.1/1077 | 1.92E-01 | 5.83E-01 | 5.28E-01 | 1.09E-01 | 1.03E-01 | ~ 1      |
| ""                                             | ;2.1/1080 | 4.35E-01 | 2.14E-01 | 8.30E-01 | 2.26E-01 | 3.02E-01 | 4.82E-01 |
| ""                                             | ;2.1/1083 | 3.25E-01 | 1.62E-01 | 6.76E-01 | 1.97E-01 | 7.12E-01 | ~ 1      |
| ""                                             | ;4/1077   | 8.79E-01 | 9.33E-01 | 8.18E-01 | 1.30E-01 | 1.45E-01 | ~ 1      |
| ""                                             | ;4/1080   | 1.52E-01 | 1.37E-02 | 2.40E-02 | 1.88E-01 | 1.30E-01 | ~ 1      |
| ""                                             | ;2.1/1079 | 2.26E-01 | 1.11E-01 | 4.53E-01 | 2.39E-01 | 9.28E-01 | 4.37E-01 |
| <b>DJ694/UAS-grim; 4/DJ1079 compared to:</b>   |           |          |          |          |          |          |          |
| DJ694/ UAS-grim                                | ;4/1083   | 2.32E-01 | 8.11E-01 | 2.42E-01 | 8.09E-01 | ~ 1      | ~ 1      |
| ""                                             | ;2.1/1077 | 3.58E-03 | 2.26E-01 | 1.20E-03 | 1.31E-03 | 5.78E-07 | ~ 1      |
| ""                                             | ;2.1/1080 | 1.15E-01 | 6.82E-02 | 4.52E-04 | 3.88E-04 | 1.49E-02 | 5.76E-01 |
| ""                                             | ;2.1/1083 | 1.72E-02 | 1.00E-01 | 3.31E-02 | 2.80E-02 | 4.42E-03 | ~ 1      |
| ""                                             | ;4/1077   | 4.23E-01 | 4.88E-01 | 4.20E-02 | 9.33E-01 | 4.23E-01 | ~ 1      |

|                                                |                       | hatching |          | pupation |          | eclosion |          |
|------------------------------------------------|-----------------------|----------|----------|----------|----------|----------|----------|
|                                                |                       | -tet     | +tet     | -tet     | +tet     | -tet     | +tet     |
| ""                                             | ;4/1080               | 4.72E-02 | 3.48E-02 | 5.96E-01 | 3.82E-01 | ~ 1      | ~ 1      |
| ""                                             | ;2.1/1079             | 1.56E-03 | 2.30E-02 | 1.49E-02 | 9.42E-03 | 1.72E-01 | 5.41E-01 |
| <b>DJ694/UAS-grim; 4/DJ1083 compared to:</b>   |                       |          |          |          |          |          |          |
| DJ694/ UAS-grim                                | ;2.1/1077             | 9.38E-03 | 4.83E-01 | 1.15E-01 | 1.42E-03 | 5.78E-07 | ~ 1      |
| ""                                             | ;2.1/1080             | 2.75E-01 | 2.21E-01 | 1.40E-01 | 3.86E-04 | 1.49E-02 | 5.76E-01 |
| ""                                             | ;2.1/1083             | 3.45E-03 | 2.74E-01 | 3.49E-01 | 2.75E-02 | 4.42E-03 | ~ 1      |
| ""                                             | ;4/1077               | 9.55E-02 | 8.71E-01 | 4.09E-01 | 7.27E-01 | 4.23E-01 | ~ 1      |
| ""                                             | ;4/1080               | 2.35E-02 | 8.31E-02 | 1.58E-01 | 4.59E-01 | ~ 1      | ~ 1      |
| ""                                             | ;2.1/1079             | 1.37E-03 | 1.50E-01 | 1.96E-01 | 1.02E-02 | 1.72E-01 | 5.41E-01 |
| <b>DJ694/UAS-grim; 2.1/DJ1077 compared to:</b> |                       |          |          |          |          |          |          |
| DJ694/ UAS-grim                                | ;2.1/1080             | 3.69E-01 | 4.05E-01 | 3.61E-01 | 2.09E-01 | 4.75E-05 | 3.47E-01 |
| ""                                             | ;2.1/1083             | 2.13E-01 | 1.77E-01 | 9.97E-01 | 4.21E-01 | 4.80E-05 | ~ 1      |
| ""                                             | ;4/1077               | 4.78E-03 | 5.21E-01 | 7.25E-01 | 1.16E-03 | 1.40E-06 | ~ 1      |
| ""                                             | ;4/1080               | 1.29E-04 | 1.26E-03 | 2.67E-04 | 1.71E-03 | 5.78E-07 | ~ 1      |
| ""                                             | ;2.1/1079             | 8.33E-01 | 2.27E-01 | 5.99E-01 | 7.17E-01 | 1.28E-01 | 2.92E-01 |
| <b>DJ694/UAS-grim; 2.1/DJ1080 compared to:</b> |                       |          |          |          |          |          |          |
| DJ694/ UAS-grim                                | ;2.1/1083             | 2.61E-01 | 3.20E-01 | 2.97E-01 | 7.05E-02 | 4.43E-01 | 5.76E-01 |
| ""                                             | ;4/1077               | 1.84E-01 | 1.59E-01 | 7.19E-01 | 3.12E-04 | 2.13E-02 | 5.76E-01 |
| ""                                             | ;4/1080               | 4.05E-03 | 3.10E-04 | 2.53E-05 | 3.76E-04 | 1.49E-02 | 5.76E-01 |
| ""                                             | ;2.1/1079             | 3.47E-01 | 6.70E-01 | 2.97E-01 | 5.39E-01 | 4.33E-01 | 5.65E-01 |
| <b>DJ694/UAS-grim; 2.1/DJ1083 compared to:</b> |                       |          |          |          |          |          |          |
| DJ694/ UAS-grim                                | ;4/1077               | 1.37E-03 | 6.36E-02 | 6.89E-01 | 2.59E-02 | 9.80E-03 | ~ 1      |
| ""                                             | ;4/1080               | 9.19E-03 | 4.19E-03 | 5.30E-03 | 2.61E-02 | 4.42E-03 | ~ 1      |
| ""                                             | ;2.1/1079             | 7.78E-02 | 2.38E-01 | 7.34E-01 | 3.99E-01 | 8.13E-01 | 5.41E-01 |
| <b>DJ694/UAS-grim; 4/DJ1077 compared to:</b>   |                       |          |          |          |          |          |          |
| DJ694/ UAS-grim                                | ;4/1080               | 2.67E-02 | 2.96E-03 | 1.07E-02 | 2.95E-01 | 4.23E-01 | ~ 1      |
| ""                                             | ;2.1/1079             | 6.70E-04 | 1.78E-02 | 6.11E-01 | 8.67E-03 | 1.93E-01 | 5.41E-01 |
| <b>DJ694/UAS-grim; 4/DJ1080 compared to:</b>   |                       |          |          |          |          |          |          |
| DJ694/ UAS-grim                                | ;2.1/1079             | 1.82E-04 | 3.77E-05 | 7.86E-03 | 1.24E-02 | 1.72E-01 | 5.41E-01 |
| <b>3 copies DJ146</b>                          |                       |          |          |          |          |          |          |
| <b>w1118;UAS-grim/+ compared to:</b>           |                       |          |          |          |          |          |          |
| DJ694/ UAS-grim                                | ;DJ1077/DJ1077,DJ1080 | 7.89E-02 | 5.55E-01 | 4.00E-02 | 1.14E-03 | 4.37E-14 | 3.11E-35 |
| ""                                             | ;DJ1077/DJ1079,DJ1080 | 1.05E-05 | 5.50E-03 | 3.46E-05 | 4.98E-05 | 2.50E-08 | 1.94E-20 |
| ""                                             | ;DJ1080/DJ1077,DJ1080 | 4.12E-01 | 1.98E-01 | 6.20E-01 | 1.78E-04 | 2.35E-13 | 3.11E-35 |
| ""                                             | ;DJ1077/DJ1077,DJ1083 | 3.82E-12 | 7.09E-09 | 1.87E-13 | 4.00E-16 | 6.51E-10 | 3.11E-35 |
| ""                                             | ;DJ1077/DJ1080,DJ1083 | 1.02E-07 | 1.17E-08 | 7.49E-06 | 1.04E-07 | 6.11E-11 | 1.50E-36 |
| ""                                             | :DJ1083/DJ1077,DJ1083 | UD       | UD       | UD       | UD       | UD       | UD       |
| ""                                             | ;DJ1079/DJ1080,DJ1083 | 1.70E-03 | 2.67E-01 | 6.56E-01 | 1.37E-02 | 5.51E-14 | 3.11E-35 |
| ""                                             | ;DJ1080/DJ1080,DJ1083 | 7.73E-03 | 2.01E-01 | 1.48E-02 | 3.39E-06 | 1.17E-26 | 3.11E-35 |
| ""                                             | ;DJ1079/DJ1079,DJ1080 | UD       | UD       | UD       | UD       | UD       | UD       |

|                                                         |                       | hatching |          | pupation |          | eclosion |          |
|---------------------------------------------------------|-----------------------|----------|----------|----------|----------|----------|----------|
|                                                         |                       | -tet     | +tet     | -tet     | +tet     | -tet     | +tet     |
| ""                                                      | ;DJ1080/DJ1079,DJ1080 | UD       | UD       | UD       | UD       | UD       | UD       |
| ""                                                      | ;DJ1079/DJ1077,DJ1083 | UD       | UD       | UD       | UD       | UD       | UD       |
| <b>DJ694/UAS-grim compared to:</b>                      |                       |          |          |          |          |          |          |
| DJ694/ UAS-grim                                         | ;DJ1077/DJ1077,DJ1080 | 6.33E-03 | 2.39E-03 | 3.94E-46 | 1.50E-27 | 1.56E-13 | ~ 1      |
| ""                                                      | ;DJ1077/DJ1079,DJ1080 | 1.46E-02 | 5.35E-03 | 1.32E-46 | 3.90E-34 | 2.89E-18 | 3.03E-04 |
| ""                                                      | ;DJ1080/DJ1077,DJ1080 | 2.35E-03 | 5.51E-03 | 8.99E-46 | 1.99E-20 | 1.52E-16 | ~ 1      |
| ""                                                      | ;DJ1077/DJ1077,DJ1083 | 8.47E-01 | 6.75E-01 | 2.48E-20 | 5.71E-12 | 2.97E-39 | ~ 1      |
| ""                                                      | ;DJ1077/DJ1080,DJ1083 | 5.47E-01 | 8.88E-01 | 3.48E-12 | 1.77E-06 | 1.75E-13 | 3.03E-04 |
| ""                                                      | :DJ1083/DJ1077,DJ1083 | UD       | UD       | UD       | UD       | UD       | UD       |
| ""                                                      | ;DJ1079/DJ1080,DJ1083 | 2.14E-02 | 4.67E-03 | 4.46E-43 | 3.32E-31 | 2.18E-33 | ~ 1      |
| ""                                                      | ;DJ1080/DJ1080,DJ1083 | 1.36E-02 | 6.24E-03 | 2.37E-63 | 2.98E-17 | 4.96E-49 | ~ 1      |
| ""                                                      | ;DJ1079/DJ1079,DJ1080 | UD       | UD       | UD       | UD       | UD       | UD       |
| ""                                                      | ;DJ1080/DJ1079,DJ1080 | UD       | UD       | UD       | UD       | UD       | UD       |
| ""                                                      | ;DJ1079/DJ1077,DJ1083 | UD       | UD       | UD       | UD       | UD       | UD       |
| <b>DJ694/UAS-grim;DJ1077/DJ1077,DJ1080 compared to:</b> |                       |          |          |          |          |          |          |
| DJ694/ UAS-grim                                         | ;DJ1077/DJ1079,DJ1080 | 2.24E-01 | 1.42E-01 | 2.53E-01 | 9.56E-01 | 4.58E-01 | 4.95E-01 |
| ""                                                      | ;DJ1080/DJ1077,DJ1080 | 6.06E-01 | 1.22E-01 | 4.34E-01 | 7.96E-01 | 8.30E-01 | ~ 1      |
| ""                                                      | ;DJ1077/DJ1077,DJ1083 | 4.62E-02 | 7.51E-02 | 5.64E-02 | 3.75E-02 | 2.23E-01 | ~ 1      |
| ""                                                      | ;DJ1077/DJ1080,DJ1083 | 2.63E-01 | 9.31E-02 | 4.12E-01 | 3.60E-01 | 8.01E-01 | 4.95E-01 |
| ""                                                      | :DJ1083/DJ1077,DJ1083 | UD       | UD       | UD       | UD       | UD       | UD       |
| ""                                                      | ;DJ1079/DJ1080,DJ1083 | 4.90E-01 | 6.42E-01 | 4.64E-01 | 7.47E-01 | 3.52E-01 | ~ 1      |
| ""                                                      | ;DJ1080/DJ1080,DJ1083 | 6.67E-01 | 6.89E-01 | 7.77E-01 | 5.54E-01 | 8.80E-01 | ~ 1      |
| ""                                                      | ;DJ1079/DJ1079,DJ1080 | UD       | UD       | UD       | UD       | UD       | UD       |
| ""                                                      | ;DJ1080/DJ1079,DJ1080 | UD       | UD       | UD       | UD       | UD       | UD       |
| ""                                                      | ;DJ1079/DJ1077,DJ1083 | UD       | UD       | UD       | UD       | UD       | UD       |
| <b>DJ694/UAS-grim;DJ1077/DJ1079,DJ1080 compared to:</b> |                       |          |          |          |          |          |          |
| DJ694/ UAS-grim                                         | ;DJ1080/DJ1077,DJ1080 | 3.03E-02 | 3.02E-01 | 8.31E-02 | 7.34E-01 | 5.91E-01 | 4.95E-01 |
| ""                                                      | ;DJ1077/DJ1077,DJ1083 | 1.09E-02 | 5.07E-02 | 2.12E-02 | 4.05E-03 | 5.05E-01 | 4.95E-01 |
| ""                                                      | ;DJ1077/DJ1080,DJ1083 | 3.01E-01 | 8.65E-02 | 4.21E-01 | 2.39E-01 | 5.80E-01 | 4.56E-01 |
| ""                                                      | :DJ1083/DJ1077,DJ1083 | UD       | UD       | UD       | UD       | UD       | UD       |
| ""                                                      | ;DJ1079/DJ1080,DJ1083 | 4.00E-01 | 3.42E-01 | 9.87E-02 | 5.78E-01 | 8.32E-01 | 4.95E-01 |
| ""                                                      | ;DJ1080/DJ1080,DJ1083 | 2.47E-01 | 5.18E-01 | 2.49E-01 | 4.12E-01 | 4.41E-01 | 4.95E-01 |
| ""                                                      | ;DJ1079/DJ1079,DJ1080 | UD       | UD       | UD       | UD       | UD       | UD       |
| ""                                                      | ;DJ1080/DJ1079,DJ1080 | UD       | UD       | UD       | UD       | UD       | UD       |
| ""                                                      | ;DJ1079/DJ1077,DJ1083 | UD       | UD       | UD       | UD       | UD       | UD       |
| <b>DJ694/UAS-grim;DJ1080/DJ1077,DJ1080 compared to:</b> |                       |          |          |          |          |          |          |
| DJ694/ UAS-grim                                         | ;DJ1077/DJ1077,DJ1083 | 1.06E-02 | 8.76E-02 | 4.55E-02 | 9.16E-02 | 2.64E-01 | ~ 1      |
| ""                                                      | ;DJ1077/DJ1080,DJ1083 | 2.00E-01 | 1.14E-01 | 3.23E-01 | 4.61E-01 | 9.80E-01 | 4.95E-01 |
| ""                                                      | :DJ1083/DJ1077,DJ1083 | UD       | UD       | UD       | UD       | UD       | UD       |
| ""                                                      | ;DJ1079/DJ1080,DJ1083 | 2.13E-02 | 8.85E-01 | 9.83E-01 | 6.15E-01 | 4.39E-01 | ~ 1      |

|                                                         |                       | hatching |          | pupation |          | eclosion |          |
|---------------------------------------------------------|-----------------------|----------|----------|----------|----------|----------|----------|
|                                                         |                       | -tet     | +tet     | -tet     | +tet     | -tet     | +tet     |
| ""                                                      | ;DJ1080/DJ1080,DJ1083 | 1.01E-01 | 9.77E-01 | 2.61E-01 | 7.50E-01 | 8.79E-01 | ~ 1      |
| ""                                                      | ;DJ1079/DJ1079,DJ1080 | UD       | UD       | UD       | UD       | UD       | UD       |
| ""                                                      | ;DJ1080/DJ1079,DJ1080 | UD       | UD       | UD       | UD       | UD       | UD       |
| ""                                                      | ;DJ1079/DJ1077,DJ1083 | UD       | UD       | UD       | UD       | UD       | UD       |
| <b>DJ694/UAS-grim;DJ1077/DJ1077,DJ1083 compared to:</b> |                       |          |          |          |          |          |          |
| DJ694/ UAS-grim                                         | ;DJ1077/DJ1080,DJ1083 | 6.97E-01 | 8.60E-01 | 5.59E-01 | 4.46E-01 | 2.83E-01 | 4.95E-01 |
| ""                                                      | :DJ1083/DJ1077,DJ1083 | UD       | UD       | UD       | UD       | UD       | UD       |
| ""                                                      | ;DJ1079/DJ1080,DJ1083 | 2.08E-02 | 9.62E-02 | 4.85E-02 | 2.37E-02 | 4.21E-01 | ~ 1      |
| ""                                                      | ;DJ1080/DJ1080,DJ1083 | 2.27E-02 | 1.22E-01 | 5.22E-02 | 1.41E-01 | 4.09E-02 | ~ 1      |
| ""                                                      | ;DJ1079/DJ1079,DJ1080 | UD       | UD       | UD       | UD       | UD       | UD       |
| ""                                                      | ;DJ1080/DJ1079,DJ1080 | UD       | UD       | UD       | UD       | UD       | UD       |
| ""                                                      | ;DJ1079/DJ1077,DJ1083 | UD       | UD       | UD       | UD       | UD       | UD       |
| <b>DJ694/UAS-grim;DJ1077/DJ1080,DJ1083 compared to:</b> |                       |          |          |          |          |          |          |
| DJ694/ UAS-grim                                         | :DJ1083/DJ1077,DJ1083 | UD       | UD       | UD       | UD       | UD       | UD       |
| ""                                                      | ;DJ1079/DJ1080,DJ1083 | 3.45E-01 | 1.15E-01 | 3.22E-01 | 2.94E-01 | 4.73E-01 | 4.95E-01 |
| ""                                                      | ;DJ1080/DJ1080,DJ1083 | 3.07E-01 | 1.34E-01 | 4.33E-01 | 6.17E-01 | 8.71E-01 | 4.95E-01 |
| ""                                                      | ;DJ1079/DJ1079,DJ1080 | UD       | UD       | UD       | UD       | UD       | UD       |
| ""                                                      | ;DJ1080/DJ1079,DJ1080 | UD       | UD       | UD       | UD       | UD       | UD       |
| ""                                                      | ;DJ1079/DJ1077,DJ1083 | UD       | UD       | UD       | UD       | UD       | UD       |
| <b>DJ694/UAS-grim;DJ1083/DJ1077,DJ1083 compared to:</b> |                       |          |          |          |          |          |          |
| DJ694/ UAS-grim                                         | ;DJ1079/DJ1080,DJ1083 | UD       | UD       | UD       | UD       | UD       | UD       |
| ""                                                      | ;DJ1080/DJ1080,DJ1083 | UD       | UD       | UD       | UD       | UD       | UD       |
| ""                                                      | ;DJ1079/DJ1079,DJ1080 | UD       | UD       | UD       | UD       | UD       | UD       |
| ""                                                      | ;DJ1080/DJ1079,DJ1080 | UD       | UD       | UD       | UD       | UD       | UD       |
| ""                                                      | ;DJ1079/DJ1077,DJ1083 | UD       | UD       | UD       | UD       | UD       | UD       |
| <b>DJ694/UAS-grim;DJ1079/DJ1080,DJ1083 compared to:</b> |                       |          |          |          |          |          |          |
| DJ694/ UAS-grim                                         | ;DJ1080/DJ1080,DJ1083 | 5.47E-01 | 9.19E-01 | 3.11E-01 | 4.23E-01 | 1.19E-01 | ~ 1      |
| ""                                                      | ;DJ1079/DJ1079,DJ1080 | UD       | UD       | UD       | UD       | UD       | UD       |
| ""                                                      | ;DJ1080/DJ1079,DJ1080 | UD       | UD       | UD       | UD       | UD       | UD       |
| ""                                                      | ;DJ1079/DJ1077,DJ1083 | UD       | UD       | UD       | UD       | UD       | UD       |
| <b>DJ694/UAS-grim;DJ1080/DJ1080,DJ1083 compared to:</b> |                       |          |          |          |          |          |          |
| DJ694/ UAS-grim                                         | ;DJ1079/DJ1079,DJ1080 | UD       | UD       | UD       | UD       | UD       | UD       |
| ""                                                      | ;DJ1080/DJ1079,DJ1080 | UD       | UD       | UD       | UD       | UD       | UD       |
| ""                                                      | ;DJ1079/DJ1077,DJ1083 | UD       | UD       | UD       | UD       | UD       | UD       |
| <b>DJ694/UAS-grim;DJ1079/DJ1079,DJ1080 compared to:</b> |                       |          |          |          |          |          |          |
| DJ694/ UAS-grim                                         | ;DJ1080/DJ1079,DJ1080 | UD       | UD       | UD       | UD       | UD       | UD       |
| ""                                                      | ;DJ1079/DJ1077,DJ1083 | UD       | UD       | UD       | UD       | UD       | UD       |
| <b>DJ694/UAS-grim;DJ1080/DJ1079,DJ1080 compared to:</b> |                       |          |          |          |          |          |          |
| DJ694/ UAS-grim                                         | ;DJ1079/DJ1077,DJ1083 | UD       | UD       | UD       | UD       | UD       | UD       |

**2 copies DJ146 + 1 copy DJ147**

|                                                      |                   | hatching |          | pupation |          | eclosion |          |
|------------------------------------------------------|-------------------|----------|----------|----------|----------|----------|----------|
|                                                      |                   | -tet     | +tet     | -tet     | +tet     | -tet     | +tet     |
| <b>w1118;UAS-grim/+ compared to:</b>                 |                   |          |          |          |          |          |          |
| DJ694/ UAS-grim                                      | 2.1/DJ1077,DJ1080 | 6.97E-02 | 1.48E-01 | 1.70E-01 | 1.19E-07 | 1.31E-07 | 8.04E-47 |
| '''                                                  | 2.1/DJ1077,DJ1083 | 1.42E-10 | 2.79E-10 | 2.61E-09 | 1.16E-10 | 2.64E-06 | 8.78E-39 |
| '''                                                  | 2.1/DJ1080,DJ1083 | 5.80E-02 | 8.15E-02 | 1.05E-03 | 2.42E-11 | 4.80E-13 | 8.04E-47 |
| '''                                                  | 3.3/DJ1077,DJ1080 | 8.98E-04 | 1.99E-02 | 3.27E-03 | 8.41E-11 | 5.34E-04 | 2.24E-44 |
| '''                                                  | 3.3/DJ1077,DJ1083 | 9.92E-08 | 1.05E-15 | 6.48E-13 | 1.44E-08 | 5.29E-09 | 8.78E-39 |
| '''                                                  | 3.3/DJ1080,DJ1083 | 9.98E-04 | 2.64E-04 | 2.57E-05 | 3.77E-11 | 1.86E-06 | 2.24E-44 |
| '''                                                  | 2.1/DJ1079,DJ1080 | 4.81E-04 | 2.67E-04 | 3.07E-01 | 2.88E-09 | 2.00E-15 | 8.78E-39 |
| '''                                                  | 3.3/DJ1079,DJ1080 | 2.37E-03 | 3.70E-03 | 1.22E-02 | 3.03E-08 | 1.92E-05 | 8.78E-39 |
| <b>DJ694/UAS-grim compared to:</b>                   |                   |          |          |          |          |          |          |
| DJ694/ UAS-grim                                      | 2.1/DJ1077,DJ1080 | 6.40E-06 | 7.97E-06 | 1.00E-40 | 1.00E-32 | 3.28E-19 | ~ 1      |
| '''                                                  | 2.1/DJ1077,DJ1083 | 9.43E-01 | 1.04E-02 | 2.11E-38 | 4.92E-09 | 2.40E-12 | ~ 1      |
| '''                                                  | 2.1/DJ1080,DJ1083 | 8.89E-06 | 1.33E-05 | 1.88E-32 | 8.61E-19 | 1.53E-08 | ~ 1      |
| '''                                                  | 3.3/DJ1077,DJ1080 | 3.46E-03 | 1.39E-04 | 8.01E-33 | 8.58E-25 | 1.01E-24 | ~ 1      |
| '''                                                  | 3.3/DJ1077,DJ1083 | 5.25E-01 | 8.52E-03 | 3.31E-25 | 4.68E-27 | 1.64E-29 | ~ 1      |
| '''                                                  | 3.3/DJ1080,DJ1083 | 1.01E-03 | 1.82E-03 | 6.40E-23 | 8.03E-12 | 1.53E-16 | ~ 1      |
| '''                                                  | 2.1/DJ1079,DJ1080 | 9.44E-03 | 5.03E-02 | 6.33E-33 | 5.99E-46 | 7.02E-33 | ~ 1      |
| '''                                                  | 3.3/DJ1079,DJ1080 | 3.20E-03 | 5.77E-03 | 3.87E-32 | 5.67E-35 | 5.07E-29 | ~ 1      |
| <b>DJ694/UAS-grim;2.1/DJ1077,DJ1080 compared to:</b> |                   |          |          |          |          |          |          |
| DJ694/ UAS-grim                                      | 2.1/DJ1077,DJ1083 | 8.80E-03 | 5.36E-03 | 5.85E-03 | 2.29E-02 | 7.64E-01 | ~ 1      |
| '''                                                  | 2.1/DJ1080,DJ1083 | 9.42E-01 | 8.69E-01 | 2.74E-01 | 4.27E-02 | 8.92E-02 | ~ 1      |
| '''                                                  | 3.3/DJ1077,DJ1080 | 3.18E-01 | 5.88E-01 | 3.49E-01 | 7.67E-02 | 3.32E-01 | ~ 1      |
| '''                                                  | 3.3/DJ1077,DJ1083 | 4.01E-02 | 6.88E-05 | 9.28E-04 | 1.75E-01 | 6.10E-01 | ~ 1      |
| '''                                                  | 3.3/DJ1080,DJ1083 | 3.60E-01 | 1.77E-01 | 1.02E-01 | 2.46E-02 | 9.75E-01 | ~ 1      |
| '''                                                  | 2.1/DJ1079,DJ1080 | 2.98E-01 | 1.52E-01 | 9.82E-01 | 1.27E-01 | 9.86E-01 | ~ 1      |
| '''                                                  | 3.3/DJ1079,DJ1080 | 4.49E-01 | 2.99E-01 | 4.29E-01 | 2.61E-01 | 3.96E-01 | ~ 1      |
| <b>DJ694/UAS-grim;2.1/DJ1077,DJ1083 compared to:</b> |                   |          |          |          |          |          |          |
| DJ694/ UAS-grim                                      | 2.1/DJ1080,DJ1083 | 1.13E-02 | 1.92E-02 | 9.92E-02 | 2.18E-03 | 3.49E-01 | ~ 1      |
| '''                                                  | 3.3/DJ1077,DJ1080 | 1.52E-01 | 3.76E-02 | 8.71E-02 | 1.75E-03 | 3.54E-01 | ~ 1      |
| '''                                                  | 3.3/DJ1077,DJ1083 | 7.24E-01 | 5.25E-01 | 1.34E-01 | 4.97E-01 | 5.70E-01 | ~ 1      |
| '''                                                  | 3.3/DJ1080,DJ1083 | 7.88E-02 | 6.67E-02 | 6.24E-01 | 7.55E-03 | 8.12E-01 | ~ 1      |
| '''                                                  | 2.1/DJ1079,DJ1080 | 1.31E-01 | 2.63E-01 | 6.34E-02 | 2.34E-03 | 7.87E-01 | ~ 1      |
| '''                                                  | 3.3/DJ1079,DJ1080 | 7.42E-02 | 1.27E-01 | 1.27E-01 | 5.34E-03 | 4.40E-01 | ~ 1      |
| <b>DJ694/UAS-grim;2.1/DJ1080,DJ1083 compared to:</b> |                   |          |          |          |          |          |          |
| DJ694/ UAS-grim                                      | 3.3/DJ1077,DJ1080 | 3.50E-01 | 7.01E-01 | 9.00E-01 | 5.93E-01 | 2.19E-02 | ~ 1      |
| '''                                                  | 3.3/DJ1077,DJ1083 | 4.76E-02 | 7.65E-05 | 1.12E-02 | 5.19E-01 | 8.03E-02 | ~ 1      |
| '''                                                  | 3.3/DJ1080,DJ1083 | 4.03E-01 | 2.23E-01 | 3.86E-01 | 4.68E-01 | 1.38E-01 | ~ 1      |
| '''                                                  | 2.1/DJ1079,DJ1080 | 3.49E-01 | 1.79E-01 | 4.65E-01 | 4.49E-01 | 1.44E-01 | ~ 1      |
| '''                                                  | 3.3/DJ1079,DJ1080 | 5.19E-01 | 3.68E-01 | 8.95E-01 | 3.44E-01 | 5.16E-02 | ~ 1      |
| <b>DJ694/UAS-grim;3.3/DJ1077,DJ1080 compared to:</b> |                   |          |          |          |          |          |          |

|                                                      |                   | hatching |          | pupation |          | eclosion |      |
|------------------------------------------------------|-------------------|----------|----------|----------|----------|----------|------|
|                                                      |                   | -tet     | +tet     | -tet     | +tet     | -tet     | +tet |
| DJ694/ UAS-grim                                      | 3.3/DJ1077,DJ1083 | 3.15E-01 | 1.82E-04 | 1.31E-02 | 7.97E-01 | 6.87E-01 | ~ 1  |
| '''                                                  | 3.3/DJ1080,DJ1083 | 8.42E-01 | 3.89E-01 | 3.69E-01 | 2.60E-01 | 3.85E-01 | ~ 1  |
| '''                                                  | 2.1/DJ1079,DJ1080 | 9.27E-01 | 2.83E-01 | 5.39E-01 | 7.00E-01 | 3.34E-01 | ~ 1  |
| '''                                                  | 3.3/DJ1079,DJ1080 | 7.25E-01 | 5.63E-01 | 9.78E-01 | 5.18E-01 | 9.94E-01 | ~ 1  |
| <b>DJ694/UAS-grim;3.3/DJ1077,DJ1083 compared to:</b> |                   |          |          |          |          |          |      |
| DJ694/ UAS-grim                                      | 3.3/DJ1080,DJ1083 | 2.04E-01 | 5.12E-04 | 1.50E-01 | 2.97E-01 | 6.49E-01 | ~ 1  |
| '''                                                  | 2.1/DJ1079,DJ1080 | 3.00E-01 | 1.54E-02 | 2.32E-02 | 9.28E-01 | 4.84E-01 | ~ 1  |
| '''                                                  | 3.3/DJ1079,DJ1080 | 2.03E-01 | 2.76E-04 | 3.75E-02 | 7.10E-01 | 6.62E-01 | ~ 1  |
| <b>DJ694/UAS-grim;3.3/DJ1080,DJ1083 compared to:</b> |                   |          |          |          |          |          |      |
| DJ694/ UAS-grim                                      | 2.1/DJ1079,DJ1080 | 9.23E-01 | 6.25E-01 | 2.68E-01 | 2.56E-01 | 9.67E-01 | ~ 1  |
| '''                                                  | 3.3/DJ1079,DJ1080 | 8.29E-01 | 7.42E-01 | 4.64E-01 | 2.08E-01 | 4.57E-01 | ~ 1  |
| <b>DJ694/UAS-grim;2.1/DJ1079,DJ1080 compared to:</b> |                   |          |          |          |          |          |      |
| DJ694/ UAS-grim                                      | 3.3/DJ1079,DJ1080 | 7.15E-01 | 5.07E-01 | 6.21E-01 | 6.19E-01 | 2.81E-01 | ~ 1  |

#### 4 copies DJ146

| <b>w1118;UAS-grim/+ compared to:</b>                           |                             |          |          |          |          |          |          |
|----------------------------------------------------------------|-----------------------------|----------|----------|----------|----------|----------|----------|
| DJ694/ UAS-grim                                                | DJ1077,DJ1079/DJ1080,DJ1080 | 1.28E-04 | 3.24E-03 | 2.86E-04 | 1.13E-03 | 1.51E-16 | 1.48E-21 |
| '''                                                            | DJ1077,DJ1077/DJ1080,DJ1080 | 1.08E-01 | 7.93E-01 | 1.63E-01 | 2.82E-05 | 5.05E-24 | 3.11E-35 |
| '''                                                            | DJ1077,DJ1077/DJ1080,DJ1083 | 5.00E-03 | 4.54E-06 | 7.14E-10 | 2.21E-16 | 1.04E-09 | 3.11E-35 |
| '''                                                            | DJ1077,DJ1080/DJ1080,DJ1083 | 3.86E-01 | 6.50E-01 | 5.61E-03 | 1.68E-11 | 4.55E-14 | 8.78E-39 |
| '''                                                            | DJ1079,DJ1079/DJ1080,DJ1080 | UD       | UD       | UD       | UD       | UD       | UD       |
| '''                                                            | DJ1077,DJ1079/DJ1080,DJ1083 | 2.48E-08 | 2.75E-06 | 1.53E-16 | 5.44E-17 | 1.00E-20 | 3.11E-35 |
| '''                                                            | DJ1079,DJ1080/DJ1080,DJ1083 | 1.87E-02 | 3.63E-01 | 2.53E-04 | 6.30E-06 | 1.53E-12 | 3.11E-35 |
| '''                                                            | DJ1077,DJ1080/DJ1083,DJ1083 | 1.94E-03 | 3.38E-03 | 9.48E-07 | 7.04E-11 | 2.15E-13 | 1.63E-13 |
| '''                                                            | DJ1080,DJ1080/DJ1083,DJ1083 | 2.68E-03 | 1.81E-01 | 8.66E-06 | 2.79E-14 | 1.36E-23 | 3.11E-35 |
| '''                                                            | DJ1077,DJ1077/DJ1083,DJ1083 | 4.99E-06 | 1.56E-05 | 8.78E-15 | 9.11E-13 | 4.18E-19 | 1.76E-06 |
| <b>DJ694/UAS-grim compared to:</b>                             |                             |          |          |          |          |          |          |
| DJ694/ UAS-grim                                                | DJ1077,DJ1079/DJ1080,DJ1080 | 9.07E-03 | 7.93E-03 | 1.09E-39 | 5.43E-30 | 1.54E-27 | 3.03E-04 |
| '''                                                            | DJ1077,DJ1077/DJ1080,DJ1080 | 4.91E-03 | 1.61E-03 | 4.02E-51 | 5.98E-85 | 2.74E-55 | ~ 1      |
| '''                                                            | DJ1077,DJ1077/DJ1080,DJ1083 | 4.86E-02 | 7.49E-01 | 3.07E-16 | 2.89E-13 | 2.00E-10 | ~ 1      |
| '''                                                            | DJ1077,DJ1080/DJ1080,DJ1083 | 2.51E-04 | 2.10E-04 | 6.20E-36 | 7.79E-08 | 1.11E-14 | ~ 1      |
| '''                                                            | DJ1079,DJ1079/DJ1080,DJ1080 | UD       | UD       | UD       | UD       | UD       | UD       |
| '''                                                            | DJ1077,DJ1079/DJ1080,DJ1083 | 2.90E-01 | 5.01E-01 | 3.33E-62 | 2.34E-06 | 1.05E-14 | ~ 1      |
| '''                                                            | DJ1079,DJ1080/DJ1080,DJ1083 | 1.22E-02 | 3.57E-03 | 1.25E-31 | 3.02E-34 | 8.01E-13 | ~ 1      |
| '''                                                            | DJ1077,DJ1080/DJ1083,DJ1083 | 6.40E-03 | 3.99E-02 | 1.72E-15 | 2.21E-07 | 2.47E-14 | 1.54E-06 |
| '''                                                            | DJ1080,DJ1080/DJ1083,DJ1083 | 4.13E-02 | 5.88E-03 | 3.09E-47 | 4.61E-32 | 6.55E-24 | ~ 1      |
| '''                                                            | DJ1077,DJ1077/DJ1083,DJ1083 | 5.18E-01 | 5.59E-01 | 7.19E-52 | 2.74E-30 | 9.61E-49 | 9.02E-15 |
| <b>DJ694/UAS-grim;DJ1077,DJ1079/DJ1080,DJ1080 compared to:</b> |                             |          |          |          |          |          |          |
| DJ694/ UAS-grim                                                | DJ1077,DJ1077/DJ1080,DJ1080 | 2.92E-01 | 1.69E-01 | 3.00E-01 | 4.83E-01 | 7.82E-01 | 4.95E-01 |
| '''                                                            | DJ1077,DJ1077/DJ1080,DJ1083 | 9.31E-01 | 2.94E-01 | 1.20E-01 | 7.08E-03 | 6.45E-01 | 4.95E-01 |
| '''                                                            | DJ1077,DJ1080/DJ1080,DJ1083 | 8.71E-02 | 1.00E-01 | 7.00E-01 | 5.82E-02 | 4.42E-01 | 3.74E-01 |



|                                                                |                             | hatching |          | pupation |          | eclosion |          |
|----------------------------------------------------------------|-----------------------------|----------|----------|----------|----------|----------|----------|
|                                                                |                             | -tet     | +tet     | -tet     | +tet     | -tet     | +tet     |
| ""                                                             | DJ1079,DJ1079/DJ1080,DJ1080 | UD       | UD       | UD       | UD       | UD       | UD       |
| ""                                                             | DJ1077,DJ1079/DJ1080,DJ1083 | 1.26E-01 | 2.03E-01 | 3.94E-03 | 5.68E-03 | 1.41E-01 | 4.95E-01 |
| ""                                                             | DJ1079,DJ1080/DJ1080,DJ1083 | 6.46E-01 | 2.94E-01 | 7.08E-01 | 3.75E-01 | 5.19E-01 | 4.95E-01 |
| ""                                                             | DJ1077,DJ1080/DJ1083,DJ1083 | 9.63E-01 | 7.51E-01 | 3.28E-01 | 6.82E-02 | 4.67E-01 | 4.71E-01 |
| ""                                                             | DJ1080,DJ1080/DJ1083,DJ1083 | 9.42E-01 | 3.87E-01 | 3.65E-01 | 1.40E-02 | 1.59E-01 | 4.95E-01 |
| ""                                                             | DJ1077,DJ1077/DJ1083,DJ1083 | 4.13E-01 | 3.28E-01 | 7.15E-03 | 2.45E-02 | 4.77E-01 | 1.33E-01 |
| <b>DJ694/UAS-grim;DJ1077,DJ1077/DJ1080,DJ1080 compared to:</b> |                             |          |          |          |          |          |          |
| DJ694/ UAS-grim                                                | DJ1077,DJ1077/DJ1080,DJ1083 | 6.72E-01 | 2.98E-01 | 1.60E-01 | 2.24E-03 | 7.83E-01 | ~ 1      |
| ""                                                             | DJ1077,DJ1080/DJ1080,DJ1083 | 2.88E-01 | 8.54E-01 | 5.95E-01 | 1.57E-01 | 6.00E-01 | ~ 1      |
| ""                                                             | DJ1079,DJ1079/DJ1080,DJ1080 | UD       | UD       | UD       | UD       | UD       | UD       |
| ""                                                             | DJ1077,DJ1079/DJ1080,DJ1083 | 1.06E-02 | 1.28E-01 | 3.37E-03 | 5.17E-04 | 2.03E-01 | ~ 1      |
| ""                                                             | DJ1079,DJ1080/DJ1080,DJ1083 | 6.92E-01 | 4.65E-01 | 3.69E-01 | 6.41E-01 | 6.69E-01 | ~ 1      |
| ""                                                             | DJ1077,DJ1080/DJ1083,DJ1083 | 6.22E-01 | 4.67E-01 | 2.78E-01 | 1.86E-01 | 6.35E-01 | 3.08E-01 |
| ""                                                             | DJ1080,DJ1080/DJ1083,DJ1083 | 6.12E-01 | 1.43E-01 | 8.73E-02 | 3.23E-03 | 1.54E-01 | ~ 1      |
| ""                                                             | DJ1077,DJ1077/DJ1083,DJ1083 | 3.87E-01 | 2.57E-01 | 5.30E-03 | 1.28E-02 | 8.33E-02 | 1.48E-01 |
| <b>DJ694/UAS-grim;DJ1077,DJ1077/DJ1080,DJ1083 compared to:</b> |                             |          |          |          |          |          |          |
| DJ694/ UAS-grim                                                | DJ1077,DJ1080/DJ1080,DJ1083 | 4.40E-01 | 1.63E-01 | 1.12E-01 | 3.82E-01 | 9.61E-01 | ~ 1      |
| ""                                                             | DJ1079,DJ1079/DJ1080,DJ1080 | UD       | UD       | UD       | UD       | UD       | UD       |
| ""                                                             | DJ1077,DJ1079/DJ1080,DJ1083 | 6.09E-01 | 7.53E-01 | 4.16E-01 | 3.09E-01 | 6.76E-01 | ~ 1      |
| ""                                                             | DJ1079,DJ1080/DJ1080,DJ1083 | 8.07E-01 | 3.29E-01 | 3.12E-01 | 1.61E-02 | 9.61E-01 | ~ 1      |
| ""                                                             | DJ1077,DJ1080/DJ1083,DJ1083 | 9.70E-01 | 4.72E-01 | 6.37E-01 | 3.57E-01 | 9.90E-01 | 3.08E-01 |
| ""                                                             | DJ1080,DJ1080/DJ1083,DJ1083 | 9.87E-01 | 3.49E-01 | 3.12E-01 | 6.03E-02 | 7.82E-01 | ~ 1      |
| ""                                                             | DJ1077,DJ1077/DJ1083,DJ1083 | 6.51E-01 | 7.92E-01 | 6.55E-01 | 4.21E-02 | 5.57E-01 | 1.48E-01 |
| <b>DJ694/UAS-grim;DJ1077,DJ1080/DJ1080,DJ1083 compared to:</b> |                             |          |          |          |          |          |          |
| DJ694/ UAS-grim                                                | DJ1079,DJ1079/DJ1080,DJ1080 | UD       | UD       | UD       | UD       | UD       | UD       |
| ""                                                             | DJ1077,DJ1079/DJ1080,DJ1083 | 2.03E-03 | 4.80E-02 | 7.33E-03 | 3.05E-01 | 5.47E-01 | ~ 1      |
| ""                                                             | DJ1079,DJ1080/DJ1080,DJ1083 | 3.41E-01 | 4.87E-01 | 5.59E-01 | 1.97E-01 | 9.85E-01 | ~ 1      |
| ""                                                             | DJ1077,DJ1080/DJ1083,DJ1083 | 3.91E-01 | 3.69E-01 | 2.68E-01 | 9.14E-01 | 9.53E-01 | 1.99E-01 |
| ""                                                             | DJ1080,DJ1080/DJ1083,DJ1083 | 3.57E-01 | 1.70E-01 | 3.11E-01 | 7.78E-01 | 7.03E-01 | ~ 1      |
| ""                                                             | DJ1077,DJ1077/DJ1083,DJ1083 | 1.95E-01 | 1.33E-01 | 1.25E-02 | 9.14E-01 | 3.17E-01 | 5.40E-02 |
| <b>DJ694/UAS-grim;DJ1079,DJ1079/DJ1080,DJ1080 compared to:</b> |                             |          |          |          |          |          |          |
| DJ694/ UAS-grim                                                | DJ1077,DJ1079/DJ1080,DJ1083 | UD       | UD       | UD       | UD       | UD       | UD       |
| ""                                                             | DJ1079,DJ1080/DJ1080,DJ1083 | UD       | UD       | UD       | UD       | UD       | UD       |
| ""                                                             | DJ1077,DJ1080/DJ1083,DJ1083 | UD       | UD       | UD       | UD       | UD       | UD       |
| ""                                                             | DJ1080,DJ1080/DJ1083,DJ1083 | UD       | UD       | UD       | UD       | UD       | UD       |
| ""                                                             | DJ1077,DJ1077/DJ1083,DJ1083 | UD       | UD       | UD       | UD       | UD       | UD       |
| <b>DJ694/UAS-grim;DJ1077,DJ1079/DJ1080,DJ1083 compared to:</b> |                             |          |          |          |          |          |          |
| DJ694/ UAS-grim                                                | DJ1079,DJ1080/DJ1080,DJ1083 | 1.61E-01 | 1.60E-01 | 4.62E-02 | 1.24E-02 | 6.57E-01 | ~ 1      |
| ""                                                             | DJ1077,DJ1080/DJ1083,DJ1083 | 4.88E-01 | 6.52E-01 | 2.32E-01 | 2.85E-01 | 4.94E-01 | 3.08E-01 |
| ""                                                             | DJ1080,DJ1080/DJ1083,DJ1083 | 5.09E-01 | 1.74E-01 | 6.79E-03 | 2.28E-02 | 7.38E-01 | ~ 1      |

|                                                                |                             | hatching |          | pupation |          | eclosion |          |
|----------------------------------------------------------------|-----------------------------|----------|----------|----------|----------|----------|----------|
|                                                                |                             | -tet     | +tet     | -tet     | +tet     | -tet     | +tet     |
| ""                                                             | DJ1077,DJ1077/DJ1083,DJ1083 | 8.73E-01 | 9.75E-01 | 1.93E-02 | 2.37E-02 | 1.16E-01 | 1.48E-01 |
| <b>DJ694/UAS-grim;DJ1079,DJ1080/DJ1080,DJ1083 compared to:</b> |                             |          |          |          |          |          |          |
| DJ694/ UAS-grim                                                | DJ1077,DJ1080/DJ1083,DJ1083 | 7.83E-01 | 5.45E-01 | 5.41E-01 | 2.31E-01 | 9.45E-01 | 3.08E-01 |
| ""                                                             | DJ1080,DJ1080/DJ1083,DJ1083 | 7.84E-01 | 6.11E-01 | 8.01E-01 | 2.82E-02 | 7.83E-01 | ~ 1      |
| ""                                                             | DJ1077,DJ1077/DJ1083,DJ1083 | 4.68E-01 | 2.98E-01 | 6.95E-02 | 5.29E-02 | 4.27E-01 | 1.48E-01 |
| <b>DJ694/UAS-grim;DJ1077,DJ1080/DJ1083,DJ1083 compared to:</b> |                             |          |          |          |          |          |          |
| DJ694/ UAS-grim                                                | DJ1080,DJ1080/DJ1083,DJ1083 | 9.86E-01 | 6.00E-01 | 6.12E-01 | 7.16E-01 | 6.56E-01 | 3.08E-01 |
| ""                                                             | DJ1077,DJ1077/DJ1083,DJ1083 | 4.83E-01 | 6.54E-01 | 3.75E-01 | 9.97E-01 | 3.26E-01 | 2.92E-01 |
| <b>DJ694/UAS-grim;DJ1080,DJ1080/DJ1083,DJ1083 compared to:</b> |                             |          |          |          |          |          |          |
| DJ694/ UAS-grim                                                | DJ1077,DJ1077/DJ1083,DJ1083 | 6.14E-01 | 3.24E-01 | 1.20E-02 | 2.11E-01 | 7.54E-02 | 1.48E-01 |
| <b>2 copies DJ146 + 2 copies DJ147</b>                         |                             |          |          |          |          |          |          |
| <b>w1118;UAS-grim/+ compared to:</b>                           |                             |          |          |          |          |          |          |
| DJ694/ UAS-grim                                                | 2.1,DJ1077/2.1,DJ1077       | 8.57E-03 | 3.91E-03 | 7.19E-02 | 2.85E-01 | 3.27E-03 | 3.11E-35 |
| ""                                                             | 2.1,DJ1077/2.1,DJ1079       | 1.50E-11 | 6.99E-10 | 2.71E-07 | 2.36E-07 | 1.14E-05 | 9.75E-42 |
| ""                                                             | 2.1,DJ1077/3.3,DJ1077       | 1.10E-06 | 4.78E-10 | 3.24E-01 | 7.39E-01 | 2.34E-01 | 1.94E-24 |
| ""                                                             | 2.1,DJ1079/2.1,DJ1079       | 3.66E-08 | 2.39E-10 | 6.75E-09 | 2.75E-04 | 1.17E-03 | 8.82E-32 |
| ""                                                             | 2.1,DJ1077/3.3,DJ1079       | 4.89E-09 | 6.97E-12 | 4.43E-06 | 1.14E-03 | 6.57E-02 | 3.62E-24 |
| ""                                                             | 3.3,DJ1077/3.3,DJ1077       | 2.67E-06 | 1.34E-08 | 1.04E-03 | 1.13E-02 | 3.32E-01 | 4.97E-16 |
| ""                                                             | 3.3,DJ1077/3.3,DJ1079       | 1.15E-09 | 3.85E-08 | 5.87E-01 | 9.66E-02 | 4.64E-01 | 7.23E-25 |
| ""                                                             | 2.1,DJ1079/3.3,DJ1079       | 4.05E-10 | 4.76E-08 | 1.47E-04 | 3.19E-04 | 1.06E-06 | 1.93E-26 |
| <b>DJ694/UAS-grim compared to:</b>                             |                             |          |          |          |          |          |          |
| DJ694/ UAS-grim                                                | 2.1,DJ1077/2.1,DJ1077       | 1.29E-02 | 3.81E-02 | 5.40E-34 | 2.27E-38 | #####    | ~ 1      |
| ""                                                             | 2.1,DJ1077/2.1,DJ1079       | 3.43E-03 | 2.46E-01 | 3.30E-24 | 1.07E-24 | 1.77E-39 | 3.30E-03 |
| ""                                                             | 2.1,DJ1077/3.3,DJ1077       | 3.82E-02 | 8.54E-01 | 2.44E-35 | 6.49E-43 | 2.25E-68 | 2.62E-05 |
| ""                                                             | 2.1,DJ1079/2.1,DJ1079       | 3.58E-04 | 2.30E-02 | 5.53E-24 | 7.23E-35 | 1.08E-38 | 4.48E-06 |
| ""                                                             | 2.1,DJ1077/3.3,DJ1079       | 9.20E-04 | 6.76E-01 | 1.11E-27 | 2.86E-33 | 6.75E-52 | 4.80E-08 |
| ""                                                             | 3.3,DJ1077/3.3,DJ1077       | 2.39E-01 | 9.55E-01 | 4.73E-29 | 4.04E-68 | 4.62E-76 | 7.19E-15 |
| ""                                                             | 3.3,DJ1077/3.3,DJ1079       | 5.06E-01 | 8.02E-01 | 8.91E-37 | 4.49E-42 | 4.00E-54 | 4.88E-16 |
| ""                                                             | 2.1,DJ1079/3.3,DJ1079       | 1.01E-01 | 3.04E-01 | 2.14E-22 | 9.21E-27 | 8.14E-46 | 4.57E-15 |
| <b>DJ694/UAS-grim;2.1,DJ1077/2.1,DJ1077 compared to:</b>       |                             |          |          |          |          |          |          |
| DJ694/ UAS-grim                                                | 2.1,DJ1077/2.1,DJ1079       | 7.46E-02 | 4.49E-03 | 2.98E-01 | 7.32E-01 | 4.82E-01 | 5.07E-01 |
| ""                                                             | 2.1,DJ1077/3.3,DJ1077       | 3.85E-01 | 1.24E-01 | 6.94E-01 | 5.54E-01 | 1.76E-02 | 3.82E-01 |
| ""                                                             | 2.1,DJ1079/2.1,DJ1079       | 3.57E-01 | 1.53E-01 | 1.91E-01 | 4.23E-01 | 7.18E-01 | 2.72E-01 |
| ""                                                             | 2.1,DJ1077/3.3,DJ1079       | 2.87E-01 | 1.03E-01 | 4.31E-01 | 5.62E-01 | 6.99E-01 | 1.63E-01 |
| ""                                                             | 3.3,DJ1077/3.3,DJ1077       | 3.74E-01 | 1.33E-02 | 6.50E-01 | 3.78E-01 | 2.05E-02 | 1.46E-01 |
| ""                                                             | 3.3,DJ1077/3.3,DJ1079       | 9.32E-03 | 8.44E-03 | 5.27E-01 | 7.55E-01 | 4.29E-01 | 1.26E-01 |
| ""                                                             | 2.1,DJ1079/3.3,DJ1079       | 7.17E-02 | 2.40E-01 | 5.51E-01 | 3.89E-01 | 4.31E-01 | 5.85E-02 |
| <b>DJ694/UAS-grim;2.1,DJ1077/2.1,DJ1079 compared to:</b>       |                             |          |          |          |          |          |          |
| DJ694/ UAS-grim                                                | 2.1,DJ1077/3.3,DJ1077       | 1.00E+00 | 2.45E-01 | 7.60E-02 | 3.88E-01 | 6.64E-02 | 1.91E-01 |
| ""                                                             | 2.1,DJ1079/2.1,DJ1079       | 2.90E-01 | 8.89E-02 | 6.93E-01 | 8.40E-01 | 6.42E-01 | 1.72E-01 |

|                                                          |                       | hatching |          | pupation |          | eclosion |          |
|----------------------------------------------------------|-----------------------|----------|----------|----------|----------|----------|----------|
|                                                          |                       | -tet     | +tet     | -tet     | +tet     | -tet     | +tet     |
| '''                                                      | 2.1,DJ1077/3.3,DJ1079 | 7.88E-01 | 4.99E-01 | 5.38E-01 | 9.64E-01 | 7.56E-02 | 2.36E-02 |
| '''                                                      | 3.3,DJ1077/3.3,DJ1077 | 6.21E-01 | 2.19E-01 | 6.14E-01 | 8.92E-01 | 1.85E-01 | 1.88E-03 |
| '''                                                      | 3.3,DJ1077/3.3,DJ1079 | 1.12E-01 | 4.15E-01 | 1.04E-01 | 8.76E-01 | 2.92E-01 | 7.64E-03 |
| '''                                                      | 2.1,DJ1079/3.3,DJ1079 | 4.02E-01 | 7.52E-01 | 7.18E-01 | 5.84E-01 | 8.13E-01 | 2.65E-03 |
| <b>DJ694/UAS-grim;2.1,DJ1077/3.3,DJ1077 compared to:</b> |                       |          |          |          |          |          |          |
| DJ694/ UAS-grim                                          | 2.1,DJ1079/2.1,DJ1079 | 5.26E-01 | 6.97E-02 | 3.58E-02 | 8.84E-02 | 1.72E-01 | 7.58E-01 |
| '''                                                      | 2.1,DJ1077/3.3,DJ1079 | 8.65E-01 | 6.99E-01 | 1.32E-01 | 1.70E-01 | 2.94E-01 | 4.68E-01 |
| '''                                                      | 3.3,DJ1077/3.3,DJ1077 | 7.96E-01 | 8.77E-01 | 3.34E-01 | 8.25E-02 | 9.38E-01 | 1.50E-01 |
| '''                                                      | 3.3,DJ1077/3.3,DJ1079 | 4.42E-01 | 7.57E-01 | 6.24E-01 | 2.92E-01 | 3.98E-01 | 4.30E-01 |
| '''                                                      | 2.1,DJ1079/3.3,DJ1079 | 6.54E-01 | 4.15E-01 | 2.50E-01 | 1.06E-01 | 2.91E-02 | 3.10E-01 |
| <b>DJ694/UAS-grim;2.1,DJ1079/2.1,DJ1079 compared to:</b> |                       |          |          |          |          |          |          |
| DJ694/ UAS-grim                                          | 2.1,DJ1077/3.3,DJ1079 | 5.36E-01 | 1.04E-01 | 2.92E-01 | 8.18E-01 | 2.53E-01 | 1.75E-01 |
| '''                                                      | 3.3,DJ1077/3.3,DJ1077 | 3.53E-01 | 8.81E-02 | 4.42E-01 | 9.58E-01 | 3.29E-01 | 1.83E-02 |
| '''                                                      | 3.3,DJ1077/3.3,DJ1079 | 6.76E-02 | 1.43E-01 | 6.05E-02 | 6.30E-01 | 4.78E-01 | 1.45E-01 |
| '''                                                      | 2.1,DJ1079/3.3,DJ1079 | 1.43E-01 | 4.75E-01 | 5.03E-01 | 5.34E-01 | 8.53E-01 | 7.45E-02 |
| <b>DJ694/UAS-grim;2.1,DJ1077/3.3,DJ1079 compared to:</b> |                       |          |          |          |          |          |          |
| DJ694/ UAS-grim                                          | 3.3,DJ1077/3.3,DJ1077 | 6.10E-01 | 8.88E-01 | 8.61E-01 | 8.55E-01 | 4.42E-01 | 1.72E-01 |
| '''                                                      | 3.3,DJ1077/3.3,DJ1079 | 2.34E-01 | 9.72E-01 | 1.37E-01 | 7.74E-01 | 7.88E-01 | 7.69E-01 |
| '''                                                      | 2.1,DJ1079/3.3,DJ1079 | 4.26E-01 | 5.30E-01 | 9.42E-01 | 4.51E-01 | 1.28E-01 | 7.37E-01 |
| <b>DJ694/UAS-grim;3.3,DJ1077/3.3,DJ1077 compared to:</b> |                       |          |          |          |          |          |          |
| DJ694/ UAS-grim                                          | 3.3,DJ1077/3.3,DJ1079 | 7.00E-01 | 4.65E-01 | 3.50E-01 | 4.62E-01 | 5.44E-01 | 4.80E-01 |
| '''                                                      | 2.1,DJ1079/3.3,DJ1079 | 9.83E-01 | 5.23E-01 | 8.69E-01 | 7.23E-01 | 1.17E-01 | 2.68E-01 |
| <b>DJ694/UAS-grim;3.3,DJ1077/3.3,DJ1079 compared to:</b> |                       |          |          |          |          |          |          |
| DJ694/ UAS-grim                                          | 2.1,DJ1079/3.3,DJ1079 | 4.20E-01 | 6.37E-01 | 2.83E-01 | 4.98E-01 | 2.32E-01 | 9.49E-01 |

Supplemental Table 3: UAS-grim lethality assay statistical analysis (t-tests).

|                |                  | hatching                             |          | pupation |          | eclosion  |           |
|----------------|------------------|--------------------------------------|----------|----------|----------|-----------|-----------|
|                |                  | -tet                                 | +tet     | -tet     | +tet     | -tet      | +tet      |
|                |                  | <b>w1118;UAS-grim/+ compared to:</b> |          |          |          |           |           |
| DJ694/UAS-grim |                  | 4.08E-20                             | 2.54E-18 | 1.20E-71 | 8.17E-62 | 1.58E-103 | 2.66E-101 |
| ""             | + 1 copy 146     | 5.83E-09                             | 1.85E-07 | 8.00E-10 | 5.11E-39 | 3.19E-61  | 1.56E-36  |
| ""             | + 2 copy 146     | 2.73E-03                             | 1.13E-03 | 1.39E-09 | 2.31E-17 | 2.46E-29  | 3.39E-37  |
| ""             | + 3 copy 146     | 4.44E-07                             | 2.55E-05 | 7.40E-06 | 2.91E-08 | 4.75E-13  | 5.47E-36  |
| ""             | + 4 copy 146     | 2.69E-05                             | 7.40E-04 | 5.32E-07 | 1.47E-10 | 1.96E-16  | 1.88E-28  |
| ""             | + 1 copy 147     | 2.00E-08                             | 2.70E-10 | 9.14E-26 | 1.28E-30 | 1.42E-58  | 1.17E-65  |
| ""             | + 2 copy 147     | 1.22E-06                             | 1.41E-07 | 2.81E-10 | 8.17E-13 | 1.38E-23  | 3.80E-84  |
| ""             | + 2 copy 146+147 | 2.75E-03                             | 2.37E-04 | 9.65E-14 | 1.43E-24 | 5.12E-11  | 4.22E-104 |
| ""             | + 3 copy 146+147 | 6.30E-05                             | 1.53E-04 | 3.20E-05 | 8.94E-16 | 1.28E-07  | 1.26E-97  |
| ""             | + 4 copy 146+147 | 6.09E-15                             | 7.78E-19 | 1.05E-06 | 2.14E-04 | 2.31E-03  | 2.12E-39  |
|                |                  | <b>DJ694/UAS-grim compared to:</b>   |          |          |          |           |           |
| ""             | + 1 copy 146     | 7.60E-04                             | 4.25E-04 | 7.89E-14 | 3.46E-04 | 2.46E-02  | 7.05E-02  |
| ""             | + 2 copy 146     | 2.46E-10                             | 1.99E-07 | 1.53E-32 | 4.20E-07 | 1.91E-03  | 3.21E-01  |
| ""             | + 3 copy 146     | 2.53E-04                             | 3.39E-03 | 9.06E-23 | 1.94E-12 | 4.20E-22  | 1.12E-02  |
| ""             | + 4 copy 146     | 2.68E-08                             | 8.42E-06 | 1.06E-23 | 2.18E-09 | 4.89E-18  | 9.01E-03  |
| ""             | + 1 copy 147     | 2.28E-01                             | 7.67E-01 | 4.36E-06 | 8.94E-04 | 1.22E-01  | ~ 1       |
| ""             | + 2 copy 147     | 8.17E-08                             | 6.76E-07 | 1.50E-23 | 2.14E-13 | 8.53E-07  | 2.56E-01  |
| ""             | + 2 copy 146+147 | 1.09E-14                             | 6.28E-10 | 1.33E-29 | 3.88E-13 | 2.72E-11  | 1.98E-01  |
| ""             | + 3 copy 146+147 | 6.27E-08                             | 1.92E-05 | 1.30E-36 | 2.37E-27 | 2.02E-20  | ~ 1       |
| ""             | + 4 copy 146+147 | 5.80E-08                             | 4.54E-02 | 1.99E-35 | 4.74E-46 | 1.37E-66  | 1.65E-06  |
|                |                  | <b>1 copy 146 compared to:</b>       |          |          |          |           |           |
| ""             | + 2 copy 146     | 1.99E-02                             | 1.96E-01 | 1.13E-02 | 7.78E-04 | 5.43E-02  | 8.93E-01  |
| ""             | + 3 copy 146     | 8.01E-01                             | 8.59E-01 | 4.28E-02 | 8.55E-07 | 5.23E-12  | 5.89E-01  |
| ""             | + 4 copy 146     | 5.40E-02                             | 3.23E-01 | 5.55E-02 | 4.25E-05 | 1.14E-09  | 3.35E-01  |
| ""             | + 1 copy 147     | 2.01E-01                             | 2.62E-02 | 3.74E-04 | 9.69E-02 | 8.26E-01  | 2.35E-01  |
| ""             | + 2 copy 147     | 1.53E-01                             | 4.49E-01 | 2.01E-01 | 2.57E-07 | 1.27E-03  | 1.33E-01  |
| ""             | + 2 copy 146+147 | 4.75E-04                             | 6.83E-02 | 1.54E-01 | 5.40E-07 | 4.70E-06  | 7.07E-02  |
| ""             | + 3 copy 146+147 | 1.46E-01                             | 5.54E-01 | 1.76E-04 | 5.93E-16 | 2.74E-11  | 7.96E-02  |
| ""             | + 4 copy 146+147 | 6.88E-01                             | 7.59E-03 | 7.88E-04 | 3.69E-29 | 1.23E-42  | 2.05E-02  |
|                |                  | <b>2 copies of 146 compared to:</b>  |          |          |          |           |           |
| ""             | + 3 copy 146     | 3.67E-02                             | 1.58E-01 | 8.44E-01 | 7.98E-03 | 1.90E-09  | 5.17E-01  |
| ""             | + 4 copy 146     | 5.71E-01                             | 8.18E-01 | 8.99E-01 | 1.24E-01 | 7.35E-07  | 2.38E-01  |
| ""             | + 1 copy 147     | 8.25E-04                             | 6.35E-04 | 1.73E-12 | 8.20E-03 | 5.80E-02  | 5.12E-01  |
| ""             | + 2 copy 147     | 2.13E-01                             | 3.90E-01 | 1.57E-01 | 3.03E-02 | 1.15E-01  | 4.13E-01  |
| ""             | + 2 copy 146+147 | 4.42E-01                             | 7.69E-01 | 6.50E-02 | 7.05E-01 | 8.27E-06  | 3.25E-01  |
| ""             | + 3 copy 146+147 | 3.05E-01                             | 4.62E-01 | 3.37E-02 | 1.68E-05 | 1.00E-11  | 3.36E-01  |
| ""             | + 4 copy 146+147 | 1.55E-03                             | 7.35E-06 | 2.02E-01 | 2.11E-16 | 5.04E-32  | 5.71E-03  |
|                |                  | <b>3 copy 146 compared to:</b>       |          |          |          |           |           |
| ""             | + 4 copy 146     | 1.17E-01                             | 2.93E-01 | 8.04E-01 | 3.25E-01 | 1.33E-01  | 5.58E-01  |

|                                    |                  |          |          |          |          |          |          |
|------------------------------------|------------------|----------|----------|----------|----------|----------|----------|
| ""                                 | + 1 copy 147     | 1.38E-01 | 7.17E-02 | 2.95E-08 | 1.53E-05 | 1.60E-11 | 9.34E-02 |
| ""                                 | + 2 copy 147     | 2.72E-01 | 4.01E-01 | 2.20E-01 | 4.11E-01 | 4.13E-06 | 3.14E-02 |
| ""                                 | + 2 copy 146+147 | 1.84E-03 | 6.34E-02 | 1.13E-01 | 3.15E-03 | 1.91E-01 | 9.94E-03 |
| ""                                 | + 3 copy 146+147 | 2.30E-01 | 4.52E-01 | 1.58E-01 | 5.81E-01 | 3.55E-01 | 1.39E-02 |
| ""                                 | + 4 copy 146+147 | 9.95E-01 | 4.15E-02 | 4.45E-01 | 3.24E-06 | 4.64E-12 | 5.44E-02 |
| <b>4 copy 146 compared to:</b>     |                  |          |          |          |          |          |          |
| ""                                 | + 1 copy 147     | 5.06E-03 | 3.83E-03 | 1.68E-08 | 5.03E-04 | 2.79E-09 | 8.35E-02 |
| ""                                 | + 2 copy 147     | 5.13E-01 | 5.95E-01 | 3.14E-01 | 7.38E-01 | 5.36E-04 | 2.50E-02 |
| ""                                 | + 2 copy 146+147 | 1.40E-01 | 5.96E-01 | 1.84E-01 | 1.16E-01 | 9.17E-01 | 7.34E-03 |
| ""                                 | + 3 copy 146+147 | 6.80E-01 | 6.75E-01 | 7.24E-02 | 4.80E-02 | 2.22E-02 | 1.13E-02 |
| ""                                 | + 4 copy 146+147 | 1.21E-02 | 1.38E-04 | 2.58E-01 | 5.59E-09 | 2.84E-16 | 2.92E-01 |
| <b>1 copy 147 compared to:</b>     |                  |          |          |          |          |          |          |
| ""                                 | + 2 copy 147     | 9.79E-03 | 1.14E-03 | 3.69E-08 | 9.00E-06 | 1.63E-03 | 4.55E-01 |
| ""                                 | + 2 copy 146+147 | 1.48E-05 | 3.23E-05 | 1.47E-10 | 6.22E-05 | 8.04E-06 | 3.94E-01 |
| ""                                 | + 3 copy 146+147 | 8.21E-03 | 6.24E-03 | 4.94E-15 | 6.34E-13 | 7.67E-11 | ~ 1      |
| ""                                 | + 4 copy 146+147 | 2.24E-02 | 3.00E-01 | 1.74E-14 | 4.09E-25 | 2.49E-41 | 1.10E-03 |
| <b>2 copy 147 compared to:</b>     |                  |          |          |          |          |          |          |
| ""                                 | + 2 copy 146+147 | 2.14E-02 | 1.74E-01 | 8.90E-01 | 1.98E-02 | 3.08E-03 | 9.42E-01 |
| ""                                 | + 3 copy 146+147 | 8.48E-01 | 9.75E-01 | 1.73E-03 | 6.14E-02 | 1.12E-07 | 2.71E-01 |
| ""                                 | + 4 copy 146+147 | 8.18E-02 | 4.49E-05 | 1.25E-02 | 9.49E-11 | 1.94E-25 | 4.09E-05 |
| <b>2 copy 146+147 compared to:</b> |                  |          |          |          |          |          |          |
| ""                                 | + 3 copy 146+147 | 5.34E-02 | 2.67E-01 | 1.17E-04 | 3.77E-07 | 2.01E-02 | 2.11E-01 |
| ""                                 | + 4 copy 146+147 | 1.91E-06 | 3.59E-08 | 1.81E-03 | 5.96E-22 | 1.52E-11 | 7.90E-07 |
| <b>3 copy 146+147 compared to:</b> |                  |          |          |          |          |          |          |
| ""                                 | + 4 copy 146+147 | 6.65E-02 | 6.10E-04 | 3.64E-01 | 2.99E-10 | 4.59E-07 | 3.19E-06 |

*Supplemental Table 4: UAS-lacZ assay L1 data set.*

% DJ694 control: specific activity normalized to the positive control, bolded values are significantly different ( $p < 0.05$ ) from the positive control.

L1 larvae

| Parents                        |               | Date      | Specific activity<br>$\Delta$ mOD/min/ $\mu$ g protein | % DJ694 control |
|--------------------------------|---------------|-----------|--------------------------------------------------------|-----------------|
| Male                           | Female        |           |                                                        |                 |
| <b>DJ694 + DJ1077</b>          |               |           |                                                        |                 |
| DJ694;1077                     | Bg2           | 15-Jun-07 | 1.95                                                   | <b>55.27</b>    |
| DJ694;1077                     | Bg2           | 15-Jun-07 | 1.81                                                   | <b>51.36</b>    |
| DJ694;1077                     | Bg2           | 15-Jun-07 | 2.07                                                   | <b>58.45</b>    |
| DJ694;1077                     | Bg2           | 15-Jun-07 | 2.40                                                   | <b>67.95</b>    |
| DJ694;1077                     | Bg2           | 04-Jul-07 | 0.22                                                   | <b>47.33</b>    |
| DJ694;1077                     | Bg2           | 04-Jul-07 | 0.31                                                   | <b>68.97</b>    |
| DJ694;1077                     | Bg2           | 04-Jul-07 | 0.27                                                   | <b>59.03</b>    |
| DJ694;1077                     | Bg2           | 31-May-07 | 0.64                                                   | 54.91           |
| DJ694;1077                     | Bg2           | 31-May-07 | 0.96                                                   | 82.43           |
| DJ694;1077                     | Bg2           | 31-May-07 | 0.66                                                   | 56.22           |
| DJ694;1077                     | Bg2           | 31-May-07 | 0.93                                                   | 79.78           |
| <b>DJ694 + DJ1080</b>          |               |           |                                                        |                 |
| DJ694;1080                     | Bg2           | 15-Jun-07 | 2.37                                                   | 67.05           |
| DJ694;1080                     | Bg2           | 15-Jun-07 | 3.40                                                   | 96.35           |
| DJ694;1080                     | Bg2           | 15-Jun-07 | 2.93                                                   | 82.87           |
| DJ694;1080                     | Bg2           | 15-Jun-07 | 4.49                                                   | 127.17          |
| DJ694;1080                     | Bg2           | 31-May-07 | 0.85                                                   | 73.03           |
| DJ694;1080                     | Bg2           | 31-May-07 | 0.97                                                   | 82.87           |
| DJ694;1080                     | Bg2           | 31-May-07 | 1.40                                                   | 119.79          |
| DJ694;1080                     | Bg2           | 31-May-07 | 1.49                                                   | 127.36          |
| DJ694;1080                     | Bg2           | 04-Jul-07 | 0.24                                                   | <b>53.14</b>    |
| DJ694;1080                     | Bg2           | 04-Jul-07 | 0.31                                                   | <b>68.25</b>    |
| DJ694;1080                     | Bg2           | 04-Jul-07 | 0.37                                                   | <b>82.01</b>    |
| <b>DJ694 + DJ1077 + DJ1080</b> |               |           |                                                        |                 |
| DJ694                          | Bg2;1077,1080 | 03-Aug-07 | 2.43                                                   | 173.06          |
| DJ694                          | Bg2;1077,1080 | 03-Aug-07 | 0.36                                                   | 25.82           |
| DJ694                          | Bg2;1077,1080 | 03-Aug-07 | 0.70                                                   | 50.09           |
| DJ694                          | Bg2;1077,1080 | 15-Aug-07 | 0.07                                                   | 14.90           |
| DJ694                          | Bg2;1077,1080 | 15-Aug-07 | 0.09                                                   | 18.72           |
| DJ694;1077,1080                | Bg2           | 15-Jun-07 | 1.53                                                   | <b>43.42</b>    |
| DJ694;1077,1080                | Bg2           | 15-Jun-07 | 2.58                                                   | <b>72.99</b>    |
| DJ694;1077,1080                | Bg2           | 15-Jun-07 | 2.28                                                   | <b>64.45</b>    |
| DJ694;1077,1080                | Bg2           | 15-Jun-07 | 1.51                                                   | <b>42.60</b>    |
| DJ694;1077,1080                | Bg2           | 04-Jul-07 | 0.05                                                   | <b>10.06</b>    |
| DJ694;1077,1080                | Bg2           | 04-Jul-07 | 0.06                                                   | <b>13.16</b>    |
| DJ694;1077,1080                | Bg2           | 04-Jul-07 | 0.17                                                   | <b>37.57</b>    |
| <b>DJ694 + DJ1080 + DJ1083</b> |               |           |                                                        |                 |
| DJ694                          | Bg2;1080,1083 | 15-Aug-07 | 0.32                                                   | 66.47           |

L1 larvae

| Parents                                 |               | Date      | Specific activity<br>$\Delta$ mOD/min/ $\mu$ g protein | % DJ694 control |
|-----------------------------------------|---------------|-----------|--------------------------------------------------------|-----------------|
| Male                                    | Female        |           |                                                        |                 |
| DJ694                                   | Bg2;1080,1083 | 15-Aug-07 | 0.31                                                   | 64.11           |
| DJ694                                   | Bg2;1080,1083 | 15-Aug-07 | 0.47                                                   | 98.59           |
| DJ694                                   | Bg2;1080,1083 | 15-Jun-07 | 2.25                                                   | 63.74           |
| DJ694                                   | Bg2;1080,1083 | 15-Jun-07 | 2.39                                                   | 67.66           |
| DJ694                                   | Bg2;1080,1083 | 15-Jun-07 | 1.88                                                   | 53.26           |
| DJ694                                   | Bg2;1080,1083 | 15-Jun-07 | 3.48                                                   | 98.60           |
| DJ694                                   | Bg2;1080,1083 | 04-Jul-07 | 0.43                                                   | 95.60           |
| DJ694                                   | Bg2;1080,1083 | 04-Jul-07 | 0.62                                                   | 136.45          |
| DJ694                                   | Bg2;1080,1083 | 04-Jul-07 | 0.77                                                   | 169.49          |
| DJ694                                   | Bg2;1080,1083 | 12-Jul-07 | 0.37                                                   | <b>44.00</b>    |
| DJ694                                   | Bg2;1080,1083 | 12-Jul-07 | 0.38                                                   | <b>44.40</b>    |
| DJ694                                   | Bg2;1080,1083 | 12-Jul-07 | 0.21                                                   | <b>24.43</b>    |
| <b>DJ694 + DJ1077 + DJ1079</b>          |               |           |                                                        |                 |
| DJ694;1077,1079                         | Bg2           | 15-Aug-07 | 0.18                                                   | 38.30           |
| DJ694;1077,1079                         | Bg2           | 15-Aug-07 | 0.15                                                   | 32.17           |
| DJ694;1077,1079                         | Bg2           | 15-Aug-07 | 0.24                                                   | 49.62           |
| DJ694;1077,1079                         | Bg2           | 15-Jun-07 | 1.10                                                   | <b>31.13</b>    |
| DJ694;1077,1079                         | Bg2           | 15-Jun-07 | 1.17                                                   | <b>33.21</b>    |
| DJ694;1077,1079                         | Bg2           | 15-Jun-07 | 1.43                                                   | <b>40.51</b>    |
| DJ694;1077,1079                         | Bg2           | 15-Jun-07 | 1.26                                                   | <b>35.74</b>    |
| DJ694;1077,1079                         | Bg2           | 04-Jul-07 | 0.38                                                   | <b>83.63</b>    |
| DJ694;1077,1079                         | Bg2           | 04-Jul-07 | 0.24                                                   | <b>53.26</b>    |
| DJ694;1077,1079                         | Bg2           | 04-Jul-07 | 0.24                                                   | <b>51.86</b>    |
| <b>DJ694 + 2 copies DJ1077 + DJ1080</b> |               |           |                                                        |                 |
| DJ694;1077                              | Bg2;1077,1080 | 03-Aug-07 | 0.04                                                   | <b>3.07</b>     |
| DJ694;1077                              | Bg2;1077,1080 | 03-Aug-07 | 0.07                                                   | <b>4.72</b>     |
| DJ694;1077                              | Bg2;1077,1080 | 03-Aug-07 | 0.07                                                   | <b>5.23</b>     |
| DJ694;1077                              | Bg2;1077,1080 | 15-Aug-07 | 0.01                                                   | 2.28            |
| DJ694;1077                              | Bg2;1077,1080 | 15-Aug-07 | 0.03                                                   | 6.78            |
| DJ694;1077                              | Bg2;1077,1080 | 12-Jul-07 | 0.00                                                   | <b>0.00</b>     |
| DJ694;1077                              | Bg2;1077,1080 | 12-Jul-07 | 0.04                                                   | <b>5.12</b>     |
| DJ694;1077                              | Bg2;1077,1080 | 12-Jul-07 | 0.04                                                   | <b>4.62</b>     |
| DJ694;1077                              | Bg2;1080,1083 | 15-Aug-07 | 0.03                                                   | <b>5.21</b>     |
| DJ694;1077                              | Bg2;1080,1083 | 15-Aug-07 | 0.01                                                   | <b>2.40</b>     |
| DJ694;1077                              | Bg2;1080,1083 | 15-Aug-07 | 0.01                                                   | <b>2.94</b>     |
| <b>DJ694 + DJ1077 + 2 copies DJ1080</b> |               |           |                                                        |                 |
| DJ694;1080                              | Bg2;1077,1080 | 03-Aug-07 | 0.10                                                   | <b>6.90</b>     |
| DJ694;1080                              | Bg2;1077,1080 | 03-Aug-07 | 0.11                                                   | <b>8.08</b>     |
| DJ694;1080                              | Bg2;1077,1080 | 03-Aug-07 | 0.07                                                   | <b>4.77</b>     |



L1 larvae

| Parents                                          |               | Date      | Specific activity<br>$\Delta$ mOD/min/ $\mu$ g protein | % DJ694 control |
|--------------------------------------------------|---------------|-----------|--------------------------------------------------------|-----------------|
| Male                                             | Female        |           |                                                        |                 |
| DJ694;1080                                       | Bg2;1077,1080 | 15-Aug-07 | 0.03                                                   | 5.91            |
| DJ694;1080                                       | Bg2;1077,1080 | 15-Aug-07 | 0.02                                                   | 4.12            |
| DJ694;1080                                       | Bg2;1077,1080 | 15-Aug-07 | 0.04                                                   | 8.94            |
| DJ694;1080                                       | Bg2;1077,1080 | 12-Jul-07 | 0.07                                                   | 7.74            |
| DJ694;1080                                       | Bg2;1077,1080 | 12-Jul-07 | 0.06                                                   | 7.48            |
| DJ694;1080                                       | Bg2;1077,1080 | 12-Jul-07 | 0.06                                                   | 6.79            |
| <b>DJ694 + 2 copies DJ1080 + DJ1083</b>          |               |           |                                                        |                 |
| DJ694;1080                                       | Bg2;1080,1083 | 03-Aug-07 | 0.18                                                   | 12.88           |
| DJ694;1080                                       | Bg2;1080,1083 | 03-Aug-07 | 0.15                                                   | 11.03           |
| DJ694;1080                                       | Bg2;1080,1083 | 03-Aug-07 | 0.08                                                   | 5.80            |
| DJ694;1080                                       | Bg2;1080,1083 | 15-Aug-07 | 0.05                                                   | 10.52           |
| DJ694;1080                                       | Bg2;1080,1083 | 15-Aug-07 | 0.04                                                   | 9.12            |
| DJ694;1080                                       | Bg2;1080,1083 | 15-Aug-07 | 0.05                                                   | 10.58           |
| <b>DJ694 + 2 copies DJ1077 + DJ1079 + DJ1080</b> |               |           |                                                        |                 |
| DJ694;1077,1079                                  | Bg2;1077,1080 | 15-Jun-07 | 0.17                                                   | 4.70            |
| DJ694;1077,1079                                  | Bg2;1077,1080 | 15-Jun-07 | 0.07                                                   | 2.03            |
| DJ694;1077,1079                                  | Bg2;1077,1080 | 15-Jun-07 | 0.22                                                   | 6.37            |
| DJ694;1077,1079                                  | Bg2;1077,1080 | 15-Jun-07 | 0.20                                                   | 5.77            |
| DJ694;1077,1079                                  | Bg2;1077,1080 | 04-Jul-07 | 0.10                                                   | 21.26           |
| DJ694;1077,1079                                  | Bg2;1077,1080 | 04-Jul-07 | 0.00                                                   | 0.00            |
| DJ694;1077,1079                                  | Bg2;1077,1080 | 04-Jul-07 | 0.05                                                   | 11.22           |
| <b>DJ694 + DJ1077 + DJ1079 + DJ1080 + DJ1083</b> |               |           |                                                        |                 |
| DJ694;1077,1079                                  | Bg2;1080,1083 | 04-Jul-07 | 0.04                                                   | 8.51            |
| DJ694;1077,1079                                  | Bg2;1080,1083 | 04-Jul-07 | 0.03                                                   | 6.97            |
| DJ694;1077,1079                                  | Bg2;1080,1083 | 04-Jul-07 | 0.06                                                   | 12.38           |
| DJ694;1077,1079                                  | Bg2;1080,1083 | 12-Jul-07 | 0.01                                                   | 1.02            |
| DJ694;1077,1079                                  | Bg2;1080,1083 | 12-Jul-07 | 0.02                                                   | 2.71            |
| DJ694;1077,1079                                  | Bg2;1080,1083 | 12-Jul-07 | 0.00                                                   | 0.00            |
| <b>DJ694 + 2 copies DJ1077 + 2 copies DJ1080</b> |               |           |                                                        |                 |
| DJ694;1077,1080                                  | Bg2;1077,1080 | 15-Jun-07 | 0.19                                                   | 5.38            |
| DJ694;1077,1080                                  | Bg2;1077,1080 | 15-Jun-07 | 0.20                                                   | 5.65            |
| DJ694;1077,1080                                  | Bg2;1077,1080 | 15-Jun-07 | 0.10                                                   | 2.71            |
| DJ694;1077,1080                                  | Bg2;1077,1080 | 15-Jun-07 | 0.14                                                   | 3.99            |
| DJ694;1077,1080                                  | Bg2;1077,1080 | 31-May-07 | 0.02                                                   | 1.89            |
| DJ694;1077,1080                                  | Bg2;1077,1080 | 31-May-07 | 0.00                                                   | 0.00            |
| DJ694;1077,1080                                  | Bg2;1077,1080 | 31-May-07 | 0.00                                                   | 0.00            |
| DJ694;1077,1080                                  | Bg2;1077,1080 | 04-Jul-07 | 0.05                                                   | 10.48           |
| DJ694;1077,1080                                  | Bg2;1077,1080 | 04-Jul-07 | 0.07                                                   | 15.41           |
| DJ694;1077,1080                                  | Bg2;1077,1080 | 04-Jul-07 | 0.04                                                   | 8.97            |

L1 larvae

| Parents                           |             | Date      | Specific activity<br>$\Delta$ mOD/min/ $\mu$ g protein | % DJ694 control |
|-----------------------------------|-------------|-----------|--------------------------------------------------------|-----------------|
| Male                              | Female      |           |                                                        |                 |
| <b>DJ694 + 2.1</b>                |             |           |                                                        |                 |
| DJ694;2.1                         | Bg2         | 15-Jun-07 | 2.75                                                   | 77.72           |
| DJ694;2.1                         | Bg2         | 15-Jun-07 | 3.95                                                   | 111.67          |
| DJ694;2.1                         | Bg2         | 15-Jun-07 | 3.78                                                   | 107.03          |
| DJ694;2.1                         | Bg2         | 15-Jun-07 | 3.66                                                   | 103.54          |
| DJ694;2.1                         | Bg2         | 31-May-07 | 1.28                                                   | 109.90          |
| DJ694;2.1                         | Bg2         | 31-May-07 | 1.16                                                   | 99.67           |
| DJ694;2.1                         | Bg2         | 31-May-07 | 1.28                                                   | 109.64          |
| DJ694;2.1                         | Bg2         | 31-May-07 | 1.37                                                   | 117.60          |
| DJ694;2.1                         | Bg2         | 04-Jul-07 | 0.20                                                   | 43.04           |
| DJ694;2.1                         | Bg2         | 04-Jul-07 | 0.24                                                   | 52.28           |
| DJ694;2.1                         | Bg2         | 04-Jul-07 | 0.43                                                   | 93.74           |
| <b>DJ694 + 3.3</b>                |             |           |                                                        |                 |
| DJ694;3.3                         | Bg2         | 15-Jun-07 | 2.38                                                   | 67.24           |
| DJ694;3.3                         | Bg2         | 15-Jun-07 | 4.59                                                   | 129.94          |
| DJ694;3.3                         | Bg2         | 15-Jun-07 | 2.42                                                   | 68.50           |
| DJ694;3.3                         | Bg2         | 15-Jun-07 | 2.69                                                   | 76.07           |
| DJ694;3.3                         | Bg2         | 31-May-07 | 0.87                                                   | 74.91           |
| DJ694;3.3                         | Bg2         | 31-May-07 | 0.78                                                   | 66.96           |
| DJ694;3.3                         | Bg2         | 31-May-07 | 0.13                                                   | 11.18           |
| DJ694;3.3                         | Bg2         | 31-May-07 | 0.66                                                   | 56.57           |
| DJ694;3.3                         | Bg2         | 04-Jul-07 | 0.35                                                   | 76.42           |
| DJ694;3.3                         | Bg2         | 04-Jul-07 | 0.41                                                   | 89.64           |
| DJ694;3.3                         | Bg2         | 04-Jul-07 | 0.40                                                   | 88.06           |
| <b>DJ694 + 2.1 + 3.3</b>          |             |           |                                                        |                 |
| DJ694                             | Bg2;2.1,3.3 | 04-Jul-07 | 0.28                                                   | <b>60.60</b>    |
| DJ694                             | Bg2;2.1,3.3 | 04-Jul-07 | 0.27                                                   | <b>58.85</b>    |
| DJ694                             | Bg2;2.1,3.3 | 04-Jul-07 | 0.18                                                   | <b>40.06</b>    |
| DJ694                             | Bg2;2.1,3.3 | 12-Jul-07 | 0.35                                                   | <b>41.23</b>    |
| DJ694                             | Bg2;2.1,3.3 | 12-Jul-07 | 0.16                                                   | <b>18.52</b>    |
| DJ694                             | Bg2;2.1,3.3 | 12-Jul-07 | 0.49                                                   | <b>57.27</b>    |
| <b>DJ694 + 2 copies 2.1 + 3.3</b> |             |           |                                                        |                 |
| DJ694;2.1                         | Bg2;2.1,3.3 | 03-Aug-07 | 0.38                                                   | <b>27.02</b>    |
| DJ694;2.1                         | Bg2;2.1,3.3 | 03-Aug-07 | 0.44                                                   | <b>31.59</b>    |
| DJ694;2.1                         | Bg2;2.1,3.3 | 03-Aug-07 | 0.37                                                   | <b>26.21</b>    |
| DJ694;2.1                         | Bg2;2.1,3.3 | 15-Aug-07 | 0.25                                                   | 52.51           |
| DJ694;2.1                         | Bg2;2.1,3.3 | 15-Aug-07 | 0.24                                                   | 49.28           |
| DJ694;2.1                         | Bg2;2.1,3.3 | 15-Aug-07 | 0.17                                                   | 35.97           |
| DJ694;2.1                         | Bg2;2.1,3.3 | 12-Jul-07 | 0.40                                                   | <b>47.26</b>    |

L1 larvae

| Parents                           |                  | Date      | Specific activity<br>$\Delta$ mOD/min/ $\mu$ g protein | % DJ694 control |
|-----------------------------------|------------------|-----------|--------------------------------------------------------|-----------------|
| Male                              | Female           |           |                                                        |                 |
| DJ694;2.1                         | Bg2;2.1,3.3      | 12-Jul-07 | 0.32                                                   | 37.87           |
| DJ694;2.1                         | Bg2;2.1,3.3      | 12-Jul-07 | 0.17                                                   | 19.60           |
| <b>DJ694 + 2.1 + 2 copies 3.3</b> |                  |           |                                                        |                 |
| DJ694;3.3                         | Bg2;2.1,3.3      | 03-Aug-07 | 0.60                                                   | 42.57           |
| DJ694;3.3                         | Bg2;2.1,3.3      | 03-Aug-07 | 0.55                                                   | 39.19           |
| DJ694;3.3                         | Bg2;2.1,3.3      | 03-Aug-07 | 0.48                                                   | 34.07           |
| DJ694;3.3                         | Bg2;2.1,3.3      | 15-Aug-07 | 0.30                                                   | 61.81           |
| DJ694;3.3                         | Bg2;2.1,3.3      | 15-Aug-07 | 0.33                                                   | 67.92           |
| DJ694;3.3                         | Bg2;2.1,3.3      | 12-Jul-07 | 0.33                                                   | 38.78           |
| DJ694;3.3                         | Bg2;2.1,3.3      | 12-Jul-07 | 0.16                                                   | 19.19           |
| DJ694;3.3                         | Bg2;2.1,3.3      | 12-Jul-07 | 0.23                                                   | 26.74           |
| <b>DJ694 + 2.1 + DJ1077</b>       |                  |           |                                                        |                 |
| DJ694                             | Bg2;2.1,1077     | 13-Nov-07 | 0.16                                                   | 16.94           |
| DJ694                             | Bg2;2.1,1077     | 13-Nov-07 | 0.24                                                   | 26.31           |
| DJ694                             | Bg2;2.1,1077     | 13-Nov-07 | 0.09                                                   | 9.73            |
| DJ694                             | Bg2;2.1,1077     | 30-Nov-07 | 0.18                                                   | 28.32           |
| DJ694                             | Bg2;2.1,1077     | 30-Nov-07 | 0.03                                                   | 4.18            |
| DJ694                             | Bg2;2.1,1077     | 30-Nov-07 | 0.10                                                   | 16.24           |
| DJ694;2.1,1077                    | Bg2              | 22-Feb-08 | 0.02                                                   | 3.49            |
| DJ694;2.1,1077                    | Bg2              | 22-Feb-08 | 0.05                                                   | 7.73            |
| DJ694;2.1,1077                    | Bg2              | 22-Feb-08 | 0.31                                                   | 44.45           |
| <b>DJ694 + 2.1 + DJ1079</b>       |                  |           |                                                        |                 |
| DJ694                             | Bg2;2.1,1079(13) | 13-Nov-07 | 0.57                                                   | 62.15           |
| DJ694                             | Bg2;2.1,1079(13) | 13-Nov-07 | 0.38                                                   | 41.20           |
| DJ694                             | Bg2;2.1,1079(13) | 13-Nov-07 | 0.22                                                   | 23.29           |
| DJ694                             | Bg2;2.1,1079(13) | 30-Nov-07 | 0.26                                                   | 42.04           |
| DJ694                             | Bg2;2.1,1079(13) | 30-Nov-07 | 0.30                                                   | 47.68           |
| DJ694                             | Bg2;2.1,1079(13) | 30-Nov-07 | 0.58                                                   | 93.49           |
| DJ694                             | Bg2;2.1,1079(14) | 13-Nov-07 | 0.53                                                   | 57.14           |
| DJ694                             | Bg2;2.1,1079(14) | 13-Nov-07 | 0.28                                                   | 30.50           |
| DJ694                             | Bg2;2.1,1079(14) | 13-Nov-07 | 0.24                                                   | 26.14           |
| DJ694                             | Bg2;2.1,1079(14) | 30-Nov-07 | 0.23                                                   | 37.82           |
| DJ694                             | Bg2;2.1,1079(14) | 30-Nov-07 | 0.34                                                   | 54.26           |
| DJ694                             | Bg2;2.1,1079(14) | 30-Nov-07 | 0.13                                                   | 20.21           |
| DJ694;2.1,1079(13)                | Bg2              | 22-Feb-08 | 0.03                                                   | 3.70            |
| DJ694;2.1,1079(13)                | Bg2              | 22-Feb-08 | 0.00                                                   | 0.00            |
| DJ694;2.1,1079(13)                | Bg2              | 22-Feb-08 | 0.00                                                   | 0.00            |
| <b>DJ694 + 3.3 + DJ1077</b>       |                  |           |                                                        |                 |
| DJ694                             | Bg2;3.3,1077     | 13-Nov-07 | 0.04                                                   | 4.65            |

L1 larvae

| Parents                              |               | Date      | Specific activity<br>$\Delta$ mOD/min/ $\mu$ g protein | % DJ694 control |
|--------------------------------------|---------------|-----------|--------------------------------------------------------|-----------------|
| Male                                 | Female        |           |                                                        |                 |
| DJ694                                | Bg2;3.3,1077  | 13-Nov-07 | 0.04                                                   | 4.68            |
| DJ694                                | Bg2;3.3,1077  | 13-Nov-07 | 0.09                                                   | 10.00           |
| DJ694                                | Bg2;3.3,1077  | 30-Nov-07 | 0.09                                                   | 13.88           |
| DJ694                                | Bg2;3.3,1077  | 30-Nov-07 | 0.07                                                   | 11.27           |
| DJ694                                | Bg2;3.3,1077  | 30-Nov-07 | 0.09                                                   | 14.67           |
| DJ694;3.3,1077                       | Bg2           | 22-Feb-08 | 0.08                                                   | 11.63           |
| DJ694;3.3,1077                       | Bg2           | 22-Feb-08 | 0.17                                                   | 23.85           |
| DJ694;3.3,1077                       | Bg2           | 22-Feb-08 | 0.14                                                   | 19.63           |
| <b>DJ694 + 3.3 + DJ1079</b>          |               |           |                                                        |                 |
| DJ694                                | Bg2;3.3,1079  | 13-Nov-07 | 0.26                                                   | 27.67           |
| DJ694                                | Bg2;3.3,1079  | 13-Nov-07 | 0.30                                                   | 32.37           |
| DJ694                                | Bg2;3.3,1079  | 13-Nov-07 | 0.75                                                   | 81.08           |
| DJ694                                | Bg2;3.3,1079  | 30-Nov-07 | 0.72                                                   | 116.18          |
| DJ694                                | Bg2;3.3,1079  | 30-Nov-07 | 0.11                                                   | 17.25           |
| DJ694                                | Bg2;3.3,1079  | 30-Nov-07 | 0.19                                                   | 30.47           |
| <b>DJ694 + 2.1 + DJ1077 + DJ1080</b> |               |           |                                                        |                 |
| DJ694;2.1                            | Bg2;1077,1080 | 03-Aug-07 | 0.07                                                   | 4.80            |
| DJ694;2.1                            | Bg2;1077,1080 | 03-Aug-07 | 0.07                                                   | 4.72            |
| DJ694;2.1                            | Bg2;1077,1080 | 03-Aug-07 | 0.07                                                   | 4.67            |
| DJ694;2.1                            | Bg2;1077,1080 | 15-Aug-07 | 0.00                                                   | 0.00            |
| DJ694;2.1                            | Bg2;1077,1080 | 15-Aug-07 | 0.01                                                   | 2.28            |
| DJ694;2.1                            | Bg2;1077,1080 | 15-Aug-07 | 0.00                                                   | 0.00            |
| DJ694;2.1                            | Bg2;1077,1080 | 12-Jul-07 | 0.13                                                   | 15.05           |
| DJ694;2.1                            | Bg2;1077,1080 | 12-Jul-07 | 0.06                                                   | 6.79            |
| DJ694;2.1                            | Bg2;1077,1080 | 12-Jul-07 | 0.19                                                   | 22.33           |
| <b>DJ694 + 2.1 + DJ1080 + DJ1083</b> |               |           |                                                        |                 |
| DJ694;2.1                            | Bg2;1080,1083 | 03-Aug-07 | 0.19                                                   | 13.59           |
| DJ694;2.1                            | Bg2;1080,1083 | 03-Aug-07 | 0.14                                                   | 9.99            |
| DJ694;2.1                            | Bg2;1080,1083 | 03-Aug-07 | 0.19                                                   | 13.58           |
| DJ694;2.1                            | Bg2;1080,1083 | 15-Aug-07 | 0.02                                                   | 4.59            |
| DJ694;2.1                            | Bg2;1080,1083 | 15-Aug-07 | 0.02                                                   | 4.32            |
| DJ694;2.1                            | Bg2;1080,1083 | 15-Aug-07 | 0.05                                                   | 10.94           |
| DJ694;2.1                            | Bg2;1080,1083 | 12-Jul-07 | 0.00                                                   | 0.00            |
| DJ694;2.1                            | Bg2;1080,1083 | 12-Jul-07 | 0.00                                                   | 0.00            |
| DJ694;2.1                            | Bg2;1080,1083 | 12-Jul-07 | 0.02                                                   | 2.44            |
| <b>DJ694 + 3.3 + DJ1077 + DJ1080</b> |               |           |                                                        |                 |
| DJ694;3.3                            | Bg2;1077,1080 | 03-Aug-07 | 0.08                                                   | 5.73            |
| DJ694;3.3                            | Bg2;1077,1080 | 03-Aug-07 | 0.10                                                   | 6.87            |
| DJ694;3.3                            | Bg2;1077,1080 | 03-Aug-07 | 0.10                                                   | 7.04            |

L1 larvae

| <b>Parents</b>                       |               | <b>Date</b> | <b>Specific activity<br/><math>\Delta</math>mOD/min/<math>\mu</math>g protein</b> | <b>% DJ694 control</b> |
|--------------------------------------|---------------|-------------|-----------------------------------------------------------------------------------|------------------------|
| <b>Male</b>                          | <b>Female</b> |             |                                                                                   |                        |
| DJ694;3.3                            | Bg2;1077,1080 | 15-Aug-07   | 0.03                                                                              | <b>6.23</b>            |
| DJ694;3.3                            | Bg2;1077,1080 | 15-Aug-07   | 0.01                                                                              | <b>1.47</b>            |
| DJ694;3.3                            | Bg2;1077,1080 | 15-Aug-07   | 0.03                                                                              | <b>6.60</b>            |
| DJ694;3.3                            | Bg2;1077,1080 | 12-Jul-07   | 0.02                                                                              | <b>2.04</b>            |
| DJ694;3.3                            | Bg2;1077,1080 | 12-Jul-07   | 0.02                                                                              | <b>2.37</b>            |
| DJ694;3.3                            | Bg2;1077,1080 | 12-Jul-07   | 0.01                                                                              | <b>1.04</b>            |
| <b>DJ694 + 3.3 + DJ1080 + DJ1083</b> |               |             |                                                                                   |                        |
| DJ694;3.3                            | Bg2;1080,1083 | 03-Aug-07   | 0.11                                                                              | <b>7.92</b>            |
| DJ694;3.3                            | Bg2;1080,1083 | 03-Aug-07   | 0.21                                                                              | <b>15.26</b>           |
| DJ694;3.3                            | Bg2;1080,1083 | 03-Aug-07   | 0.16                                                                              | <b>11.45</b>           |
| DJ694;3.3                            | Bg2;1080,1083 | 15-Aug-07   | 0.07                                                                              | <b>14.67</b>           |
| DJ694;3.3                            | Bg2;1080,1083 | 15-Aug-07   | 0.05                                                                              | <b>9.70</b>            |
| DJ694;3.3                            | Bg2;1080,1083 | 15-Aug-07   | 0.05                                                                              | <b>10.46</b>           |
| DJ694;3.3                            | Bg2;1080,1083 | 12-Jul-07   | 0.15                                                                              | <b>17.99</b>           |
| DJ694;3.3                            | Bg2;1080,1083 | 12-Jul-07   | 0.11                                                                              | <b>13.50</b>           |
| DJ694;3.3                            | Bg2;1080,1083 | 12-Jul-07   | 0.13                                                                              | <b>15.42</b>           |
| <b>DJ694 + 2.1 + 3.3 + DJ1077</b>    |               |             |                                                                                   |                        |
| DJ694;1077                           | Bg2;2.1,3.3   | 03-Aug-07   | 0.19                                                                              | <b>13.49</b>           |
| DJ694;1077                           | Bg2;2.1,3.3   | 03-Aug-07   | 0.30                                                                              | <b>21.41</b>           |
| DJ694;1077                           | Bg2;2.1,3.3   | 03-Aug-07   | 0.13                                                                              | <b>9.56</b>            |
| DJ694;1077                           | Bg2;2.1,3.3   | 15-Aug-07   | 0.07                                                                              | <b>14.74</b>           |
| DJ694;1077                           | Bg2;2.1,3.3   | 15-Aug-07   | 0.06                                                                              | <b>13.43</b>           |
| DJ694;1077                           | Bg2;2.1,3.3   | 15-Aug-07   | 0.07                                                                              | <b>13.64</b>           |
| DJ694;1077                           | Bg2;2.1,3.3   | 04-Jul-07   | 0.13                                                                              | <b>29.57</b>           |
| DJ694;1077                           | Bg2;2.1,3.3   | 04-Jul-07   | 0.16                                                                              | <b>35.05</b>           |
| DJ694;1077                           | Bg2;2.1,3.3   | 04-Jul-07   | 0.11                                                                              | <b>24.72</b>           |
| DJ694;1077                           | Bg2;2.1,3.3   | 12-Jul-07   | 0.05                                                                              | <b>6.07</b>            |
| DJ694;1077                           | Bg2;2.1,3.3   | 12-Jul-07   | 0.04                                                                              | <b>5.11</b>            |
| DJ694;1077                           | Bg2;2.1,3.3   | 12-Jul-07   | 0.03                                                                              | <b>3.27</b>            |
| <b>DJ694 + 2.1 + 3.3 + DJ1080</b>    |               |             |                                                                                   |                        |
| DJ694;1080                           | Bg2;2.1,3.3   | 03-Aug-07   | 0.17                                                                              | <b>12.01</b>           |
| DJ694;1080                           | Bg2;2.1,3.3   | 03-Aug-07   | 0.30                                                                              | <b>21.52</b>           |
| DJ694;1080                           | Bg2;2.1,3.3   | 03-Aug-07   | 0.25                                                                              | <b>18.07</b>           |
| DJ694;1080                           | Bg2;2.1,3.3   | 15-Aug-07   | 0.15                                                                              | 32.19                  |
| DJ694;1080                           | Bg2;2.1,3.3   | 15-Aug-07   | 0.26                                                                              | 53.40                  |
| DJ694;1080                           | Bg2;2.1,3.3   | 15-Aug-07   | 0.29                                                                              | 59.33                  |
| DJ694;1080                           | Bg2;2.1,3.3   | 04-Jul-07   | 0.13                                                                              | <b>28.35</b>           |
| DJ694;1080                           | Bg2;2.1,3.3   | 04-Jul-07   | 0.14                                                                              | <b>30.37</b>           |
| DJ694;1080                           | Bg2;2.1,3.3   | 04-Jul-07   | 0.16                                                                              | <b>34.63</b>           |

L1 larvae

| <b>Parents</b>                                |                  | <b>Date</b> | <b>Specific activity<br/><math>\Delta</math>mOD/min/<math>\mu</math>g protein</b> | <b>% DJ694 control</b> |
|-----------------------------------------------|------------------|-------------|-----------------------------------------------------------------------------------|------------------------|
| <b>Male</b>                                   | <b>Female</b>    |             |                                                                                   |                        |
| DJ694;1080                                    | Bg2;2.1,3.3      | 12-Jul-07   | 0.46                                                                              | <b>53.64</b>           |
| DJ694;1080                                    | Bg2;2.1,3.3      | 12-Jul-07   | 0.44                                                                              | <b>51.52</b>           |
| DJ694;1080                                    | Bg2;2.1,3.3      | 12-Jul-07   | 0.28                                                                              | <b>33.10</b>           |
| <b>DJ694 + 2 copies 2.1 + 2 copies DJ1077</b> |                  |             |                                                                                   |                        |
| DJ694;2.1,1077                                | Bg2;2.1,1077     | 13-Nov-07   | 0.08                                                                              | <b>8.68</b>            |
| DJ694;2.1,1077                                | Bg2;2.1,1077     | 13-Nov-07   | 0.03                                                                              | <b>3.26</b>            |
| DJ694;2.1,1077                                | Bg2;2.1,1077     | 13-Nov-07   | 0.06                                                                              | <b>6.80</b>            |
| DJ694;2.1,1077                                | Bg2;2.1,1077     | 30-Nov-07   | 0.00                                                                              | <b>0.51</b>            |
| DJ694;2.1,1077                                | Bg2;2.1,1077     | 30-Nov-07   | 0.02                                                                              | <b>2.67</b>            |
| DJ694;2.1,1077                                | Bg2;2.1,1077     | 30-Nov-07   | 0.01                                                                              | <b>0.85</b>            |
| DJ694;2.1,1077                                | Bg2;2.1,1077     | 19-Dec-07   | 0.01                                                                              | <b>2.38</b>            |
| DJ694;2.1,1077                                | Bg2;2.1,1077     | 19-Dec-07   | 0.01                                                                              | <b>0.99</b>            |
| DJ694;2.1,1077                                | Bg2;2.1,1077     | 19-Dec-07   | 0.01                                                                              | <b>0.95</b>            |
| DJ694;2.1,1077                                | Bg2;2.1,1077     | 19-Dec-07   | 0.00                                                                              | <b>0.34</b>            |
| DJ694;2.1,1077                                | Bg2;2.1,1077     | 19-Dec-07   | 0.02                                                                              | <b>2.58</b>            |
| DJ694;2.1,1077                                | Bg2;2.1,1077     | 10-Feb-08   | 0.01                                                                              | <b>2.23</b>            |
| DJ694;2.1,1077                                | Bg2;2.1,1077     | 10-Feb-08   | 0.02                                                                              | <b>3.55</b>            |
| DJ694;2.1,1077                                | Bg2;2.1,1077     | 10-Feb-08   | 0.00                                                                              | <b>0.00</b>            |
| DJ694;2.1,1077                                | Bg2;2.1,1077     | 22-Feb-08   | 0.00                                                                              | <b>0.26</b>            |
| DJ694;2.1,1077                                | Bg2;2.1,1077     | 22-Feb-08   | 0.01                                                                              | <b>0.72</b>            |
| DJ694;2.1,1077                                | Bg2;2.1,1077     | 22-Feb-08   | 0.00                                                                              | <b>0.00</b>            |
| DJ694;2.1,1077                                | Bg2;2.1,1077     | 19-Dec-07   | 0.43                                                                              | <b>72.77</b>           |
| <b>DJ694 + 2 copies 2.1 + DJ1077 + DJ1079</b> |                  |             |                                                                                   |                        |
| DJ694;2.1,1077                                | Bg2;2.1,1079(13) | 13-Nov-07   | 0.10                                                                              | <b>10.71</b>           |
| DJ694;2.1,1077                                | Bg2;2.1,1079(13) | 13-Nov-07   | 0.16                                                                              | <b>16.84</b>           |
| DJ694;2.1,1077                                | Bg2;2.1,1079(13) | 30-Nov-07   | 0.15                                                                              | <b>23.59</b>           |
| DJ694;2.1,1077                                | Bg2;2.1,1079(13) | 30-Nov-07   | 0.16                                                                              | <b>25.48</b>           |
| DJ694;2.1,1077                                | Bg2;2.1,1079(13) | 30-Nov-07   | 0.03                                                                              | <b>5.41</b>            |
| DJ694;2.1,1077                                | Bg2;2.1,1079(14) | 13-Nov-07   | 0.02                                                                              | <b>1.96</b>            |
| DJ694;2.1,1077                                | Bg2;2.1,1079(14) | 13-Nov-07   | 0.06                                                                              | <b>6.97</b>            |
| DJ694;2.1,1077                                | Bg2;2.1,1079(14) | 13-Nov-07   | 0.02                                                                              | <b>2.06</b>            |
| DJ694;2.1,1077                                | Bg2;2.1,1079(14) | 30-Nov-07   | 0.05                                                                              | <b>8.59</b>            |
| DJ694;2.1,1077                                | Bg2;2.1,1079(14) | 30-Nov-07   | 0.13                                                                              | <b>21.61</b>           |
| DJ694;2.1,1077                                | Bg2;2.1,1079(14) | 30-Nov-07   | 0.04                                                                              | <b>5.85</b>            |
| DJ694;2.1,1077                                | Bg2;2.1,1079(14) | 19-Dec-07   | 0.09                                                                              | <b>15.75</b>           |
| DJ694;2.1,1077                                | Bg2;2.1,1079(14) | 19-Dec-07   | 0.07                                                                              | <b>12.61</b>           |
| DJ694;2.1,1077                                | Bg2;2.1,1079(14) | 19-Dec-07   | 0.00                                                                              | <b>0.75</b>            |
| DJ694;2.1,1077                                | Bg2;2.1,1079(14) | 19-Dec-07   | 0.02                                                                              | <b>3.38</b>            |
| DJ694;2.1,1077                                | Bg2;2.1,1079(14) | 19-Dec-07   | 0.02                                                                              | <b>3.79</b>            |
| DJ694;2.1,1079(13)                            | Bg2;2.1,1077     | 19-Dec-07   | 0.00                                                                              | <b>0.59</b>            |

L1 larvae

| Parents            |                  | Date      | Specific activity<br>$\Delta$ mOD/min/ $\mu$ g protein | % DJ694 control |
|--------------------|------------------|-----------|--------------------------------------------------------|-----------------|
| Male               | Female           |           |                                                        |                 |
| DJ694;2.1,1079(13) | Bg2;2.1,1077     | 19-Dec-07 | 0.01                                                   | 1.85            |
| DJ694;2.1,1079(13) | Bg2;2.1,1077     | 19-Dec-07 | 0.01                                                   | 2.43            |
| DJ694;2.1,1079(14) | Bg2;2.1,1077     | 19-Dec-07 | 0.07                                                   | 11.87           |
| DJ694;2.1,1079(14) | Bg2;2.1,1077     | 19-Dec-07 | 0.01                                                   | 1.00            |
| DJ694;2.1,1079(14) | Bg2;2.1,1077     | 19-Dec-07 | 0.01                                                   | 1.45            |
| DJ694;2.1,1079(14) | Bg2;2.1,1077     | 19-Dec-07 | 0.25                                                   | 43.09           |
| DJ694;2.1,1079(14) | Bg2;2.1,1077     | 19-Dec-07 | 0.02                                                   | 2.74            |
| DJ694;2.1,1077     | Bg2;2.1,1079(13) | 10-Feb-08 | 0.01                                                   | 2.53            |
| DJ694;2.1,1077     | Bg2;2.1,1079(13) | 10-Feb-08 | 0.03                                                   | 6.74            |
| DJ694;2.1,1077     | Bg2;2.1,1079(13) | 10-Feb-08 | 0.01                                                   | 1.24            |
| DJ694;2.1,1077     | Bg2;2.1,1079(13) | 22-Feb-08 | 0.00                                                   | 0.00            |
| DJ694;2.1,1077     | Bg2;2.1,1079(13) | 22-Feb-08 | 0.00                                                   | 0.17            |
| DJ694;2.1,1077     | Bg2;2.1,1079(13) | 22-Feb-08 | 0.02                                                   | 2.34            |
| DJ694;2.1,1077     | Bg2;2.1,1079(14) | 10-Feb-08 | 0.00                                                   | 0.00            |
| DJ694;2.1,1077     | Bg2;2.1,1079(14) | 10-Feb-08 | 0.00                                                   | 0.00            |
| DJ694;2.1,1077     | Bg2;2.1,1079(14) | 10-Feb-08 | 0.00                                                   | 0.00            |
| DJ694;2.1,1079(13) | Bg2;2.1,1077     | 10-Feb-08 | 0.00                                                   | 0.57            |
| DJ694;2.1,1079(13) | Bg2;2.1,1077     | 10-Feb-08 | 0.00                                                   | 0.15            |
| DJ694;2.1,1079(13) | Bg2;2.1,1077     | 10-Feb-08 | 0.02                                                   | 4.63            |
| DJ694;2.1,1079(14) | Bg2;2.1,1077     | 10-Feb-08 | 0.21                                                   | 47.42           |
| DJ694;2.1,1079(14) | Bg2;2.1,1077     | 10-Feb-08 | 0.02                                                   | 4.20            |
| DJ694;2.1,1079(14) | Bg2;2.1,1077     | 10-Feb-08 | 0.05                                                   | 10.98           |
| DJ694;2.1,1077     | Bg2;2.1,1079(14) | 19-Dec-07 | 0.43                                                   | 73.00           |
| DJ694;2.1,1079(14) | Bg2;2.1,1077     | 19-Dec-07 | 0.45                                                   | 75.73           |

**DJ694 + 2.1 + 3.3 + 2 copies DJ1077**

|                |              |           |      |       |
|----------------|--------------|-----------|------|-------|
| DJ694;2.1,1077 | Bg2;3.3,1077 | 13-Nov-07 | 0.05 | 5.94  |
| DJ694;2.1,1077 | Bg2;3.3,1077 | 13-Nov-07 | 0.03 | 3.43  |
| DJ694;2.1,1077 | Bg2;3.3,1077 | 13-Nov-07 | 0.08 | 8.52  |
| DJ694;2.1,1077 | Bg2;3.3,1077 | 30-Nov-07 | 0.02 | 2.69  |
| DJ694;2.1,1077 | Bg2;3.3,1077 | 30-Nov-07 | 0.09 | 14.27 |
| DJ694;2.1,1077 | Bg2;3.3,1077 | 30-Nov-07 | 0.02 | 2.54  |
| DJ694;2.1,1077 | Bg2;3.3,1077 | 19-Dec-07 | 0.11 | 18.81 |
| DJ694;2.1,1077 | Bg2;3.3,1077 | 19-Dec-07 | 0.01 | 2.00  |
| DJ694;2.1,1077 | Bg2;3.3,1077 | 19-Dec-07 | 0.01 | 2.16  |
| DJ694;2.1,1077 | Bg2;3.3,1077 | 19-Dec-07 | 0.15 | 26.28 |
| DJ694;2.1,1077 | Bg2;3.3,1077 | 19-Dec-07 | 0.12 | 19.84 |
| DJ694;3.3,1077 | Bg2;2.1,1077 | 13-Nov-07 | 0.12 | 12.47 |
| DJ694;3.3,1077 | Bg2;2.1,1077 | 13-Nov-07 | 0.02 | 2.55  |
| DJ694;3.3,1077 | Bg2;2.1,1077 | 13-Nov-07 | 0.03 | 3.36  |
| DJ694;3.3,1077 | Bg2;2.1,1077 | 30-Nov-07 | 0.08 | 12.67 |

L1 larvae

| Parents        |              | Date      | Specific activity<br>$\Delta$ mOD/min/ $\mu$ g protein | % DJ694 control |
|----------------|--------------|-----------|--------------------------------------------------------|-----------------|
| Male           | Female       |           |                                                        |                 |
| DJ694;3.3,1077 | Bg2;2.1,1077 | 30-Nov-07 | 0.03                                                   | 5.29            |
| DJ694;3.3,1077 | Bg2;2.1,1077 | 30-Nov-07 | 0.01                                                   | 2.15            |
| DJ694;3.3,1077 | Bg2;2.1,1077 | 19-Dec-07 | 0.01                                                   | 2.44            |
| DJ694;3.3,1077 | Bg2;2.1,1077 | 19-Dec-07 | 0.01                                                   | 1.75            |
| DJ694;3.3,1077 | Bg2;2.1,1077 | 19-Dec-07 | 0.02                                                   | 3.24            |
| DJ694;3.3,1077 | Bg2;2.1,1077 | 19-Dec-07 | 0.09                                                   | 16.09           |
| DJ694;3.3,1077 | Bg2;2.1,1077 | 19-Dec-07 | 0.08                                                   | 13.70           |
| DJ694;3.3,1077 | Bg2;2.1,1077 | 19-Dec-07 | 0.07                                                   | 11.82           |
| DJ694;2.1,1077 | Bg2;3.3,1077 | 10-Feb-08 | 0.01                                                   | 2.89            |
| DJ694;2.1,1077 | Bg2;3.3,1077 | 10-Feb-08 | 0.00                                                   | 0.00            |
| DJ694;2.1,1077 | Bg2;3.3,1077 | 10-Feb-08 | 0.00                                                   | 0.18            |
| DJ694;2.1,1077 | Bg2;3.3,1077 | 22-Feb-08 | 0.04                                                   | 5.46            |
| DJ694;2.1,1077 | Bg2;3.3,1077 | 22-Feb-08 | 0.00                                                   | 0.60            |
| DJ694;2.1,1077 | Bg2;3.3,1077 | 22-Feb-08 | 0.01                                                   | 1.00            |
| DJ694;3.3,1077 | Bg2;2.1,1077 | 10-Feb-08 | 0.01                                                   | 2.40            |
| DJ694;3.3,1077 | Bg2;2.1,1077 | 10-Feb-08 | 0.01                                                   | 1.21            |
| DJ694;3.3,1077 | Bg2;2.1,1077 | 10-Feb-08 | 0.00                                                   | 0.59            |
| DJ694;3.3,1077 | Bg2;2.1,1077 | 22-Feb-08 | 0.02                                                   | 2.77            |
| DJ694;3.3,1077 | Bg2;2.1,1077 | 22-Feb-08 | 0.01                                                   | 1.55            |
| DJ694;3.3,1077 | Bg2;2.1,1077 | 22-Feb-08 | 0.01                                                   | 1.28            |
| DJ694;2.1,1077 | Bg2;3.3,1077 | 19-Dec-07 | 0.02                                                   | 3.54            |

**DJ694 + 2.1 + 3.3 + DJ1077 + DJ1079**

|                    |              |           |      |       |
|--------------------|--------------|-----------|------|-------|
| DJ694;2.1,1077     | Bg2;3.3,1079 | 13-Nov-07 | 0.02 | 1.73  |
| DJ694;2.1,1077     | Bg2;3.3,1079 | 13-Nov-07 | 0.01 | 1.02  |
| DJ694;2.1,1077     | Bg2;3.3,1079 | 13-Nov-07 | 0.00 | 0.00  |
| DJ694;2.1,1077     | Bg2;3.3,1079 | 30-Nov-07 | 0.03 | 5.13  |
| DJ694;2.1,1077     | Bg2;3.3,1079 | 30-Nov-07 | 0.00 | 0.00  |
| DJ694;2.1,1077     | Bg2;3.3,1079 | 30-Nov-07 | 0.02 | 3.78  |
| DJ694;2.1,1077     | Bg2;3.3,1079 | 19-Dec-07 | 0.01 | 2.42  |
| DJ694;2.1,1077     | Bg2;3.3,1079 | 19-Dec-07 | 0.01 | 2.08  |
| DJ694;2.1,1077     | Bg2;3.3,1079 | 19-Dec-07 | 0.02 | 3.79  |
| DJ694;2.1,1077     | Bg2;3.3,1079 | 19-Dec-07 | 0.01 | 2.49  |
| DJ694;2.1,1077     | Bg2;3.3,1079 | 19-Dec-07 | 0.04 | 6.19  |
| DJ694;2.1,1079(13) | Bg2;3.3,1077 | 19-Dec-07 | 0.04 | 7.31  |
| DJ694;2.1,1079(13) | Bg2;3.3,1077 | 19-Dec-07 | 0.05 | 8.29  |
| DJ694;2.1,1079(13) | Bg2;3.3,1077 | 19-Dec-07 | 0.03 | 5.57  |
| DJ694;2.1,1079(14) | Bg2;3.3,1077 | 19-Dec-07 | 0.03 | 4.67  |
| DJ694;2.1,1079(14) | Bg2;3.3,1077 | 19-Dec-07 | 0.02 | 2.90  |
| DJ694;2.1,1079(14) | Bg2;3.3,1077 | 19-Dec-07 | 0.02 | 3.03  |
| DJ694;2.1,1079(14) | Bg2;3.3,1077 | 19-Dec-07 | 0.12 | 21.05 |



L1 larvae

| Parents            |                  | Date      | Specific activity<br>$\Delta$ mOD/min/ $\mu$ g protein | % DJ694 control |
|--------------------|------------------|-----------|--------------------------------------------------------|-----------------|
| Male               | Female           |           |                                                        |                 |
| DJ694;2.1,1079(14) | Bg2;3.3,1077     | 19-Dec-07 | 0.07                                                   | 12.52           |
| DJ694;3.3,1077     | Bg2;2.1,1079(13) | 13-Nov-07 | 0.05                                                   | 5.64            |
| DJ694;3.3,1077     | Bg2;2.1,1079(13) | 13-Nov-07 | 0.06                                                   | 6.82            |
| DJ694;3.3,1077     | Bg2;2.1,1079(13) | 13-Nov-07 | 0.04                                                   | 4.27            |
| DJ694;3.3,1077     | Bg2;2.1,1079(13) | 30-Nov-07 | 0.06                                                   | 9.95            |
| DJ694;3.3,1077     | Bg2;2.1,1079(13) | 30-Nov-07 | 0.04                                                   | 6.85            |
| DJ694;3.3,1077     | Bg2;2.1,1079(13) | 30-Nov-07 | 0.08                                                   | 12.12           |
| DJ694;3.3,1077     | Bg2;2.1,1079(13) | 19-Dec-07 | 0.04                                                   | 6.28            |
| DJ694;3.3,1077     | Bg2;2.1,1079(13) | 19-Dec-07 | 0.02                                                   | 3.00            |
| DJ694;3.3,1077     | Bg2;2.1,1079(13) | 19-Dec-07 | 0.02                                                   | 3.74            |
| DJ694;3.3,1077     | Bg2;2.1,1079(14) | 13-Nov-07 | 0.04                                                   | 4.58            |
| DJ694;3.3,1077     | Bg2;2.1,1079(14) | 13-Nov-07 | 0.04                                                   | 4.07            |
| DJ694;3.3,1077     | Bg2;2.1,1079(14) | 13-Nov-07 | 0.07                                                   | 7.19            |
| DJ694;3.3,1077     | Bg2;2.1,1079(14) | 30-Nov-07 | 0.04                                                   | 7.01            |
| DJ694;3.3,1077     | Bg2;2.1,1079(14) | 30-Nov-07 | 0.02                                                   | 3.26            |
| DJ694;3.3,1077     | Bg2;2.1,1079(14) | 30-Nov-07 | 0.02                                                   | 2.48            |
| DJ694;3.3,1077     | Bg2;2.1,1079(14) | 19-Dec-07 | 0.03                                                   | 4.78            |
| DJ694;3.3,1077     | Bg2;2.1,1079(14) | 19-Dec-07 | 0.01                                                   | 1.60            |
| DJ694;3.3,1077     | Bg2;2.1,1079(14) | 19-Dec-07 | 0.01                                                   | 1.56            |
| DJ694;3.3,1077     | Bg2;2.1,1079(14) | 19-Dec-07 | 0.05                                                   | 8.97            |
| DJ694;3.3,1077     | Bg2;2.1,1079(14) | 19-Dec-07 | 0.05                                                   | 8.25            |
| DJ694;3.3,1077     | Bg2;2.1,1079(14) | 19-Dec-07 | 0.03                                                   | 4.44            |
| DJ694;1077,1079    | Bg2;2.1,3.3      | 15-Jun-07 | 0.12                                                   | 3.37            |
| DJ694;1077,1079    | Bg2;2.1,3.3      | 15-Jun-07 | 0.24                                                   | 6.87            |
| DJ694;1077,1079    | Bg2;2.1,3.3      | 15-Jun-07 | 0.11                                                   | 3.05            |
| DJ694;1077,1079    | Bg2;2.1,3.3      | 15-Jun-07 | 0.18                                                   | 5.14            |
| DJ694;1077,1079    | Bg2;2.1,3.3      | 04-Jul-07 | 0.09                                                   | 19.57           |
| DJ694;1077,1079    | Bg2;2.1,3.3      | 04-Jul-07 | 0.18                                                   | 38.73           |
| DJ694;1077,1079    | Bg2;2.1,3.3      | 04-Jul-07 | 0.09                                                   | 19.47           |
| DJ694;2.1,1077     | Bg2;3.3,1079     | 10-Feb-08 | 0.00                                                   | 0.39            |
| DJ694;2.1,1077     | Bg2;3.3,1079     | 10-Feb-08 | 0.00                                                   | 0.79            |
| DJ694;2.1,1077     | Bg2;3.3,1079     | 10-Feb-08 | 0.00                                                   | 0.65            |
| DJ694;2.1,1079(13) | Bg2;3.3,1077     | 10-Feb-08 | 0.00                                                   | 0.00            |
| DJ694;2.1,1079(13) | Bg2;3.3,1077     | 10-Feb-08 | 0.00                                                   | 1.06            |
| DJ694;2.1,1079(13) | Bg2;3.3,1077     | 10-Feb-08 | 0.00                                                   | -0.08           |
| DJ694;2.1,1079(13) | Bg2;3.3,1077     | 22-Feb-08 | 0.00                                                   | 0.51            |
| DJ694;2.1,1079(13) | Bg2;3.3,1077     | 22-Feb-08 | 0.01                                                   | 1.22            |
| DJ694;2.1,1079(13) | Bg2;3.3,1077     | 22-Feb-08 | 0.01                                                   | 1.07            |
| DJ694;2.1,1079(14) | Bg2;3.3,1077     | 10-Feb-08 | 0.02                                                   | 4.62            |
| DJ694;2.1,1079(14) | Bg2;3.3,1077     | 10-Feb-08 | 0.07                                                   | 15.03           |

L1 larvae

| Parents            |                  | Date      | Specific activity<br>$\Delta$ mOD/min/ $\mu$ g protein | % DJ694 control |
|--------------------|------------------|-----------|--------------------------------------------------------|-----------------|
| Male               | Female           |           |                                                        |                 |
| DJ694;2.1,1079(14) | Bg2;3.3,1077     | 10-Feb-08 | 0.07                                                   | 16.94           |
| DJ694;3.3,1077     | Bg2;2.1,1079(13) | 10-Feb-08 | 0.00                                                   | 0.88            |
| DJ694;3.3,1077     | Bg2;2.1,1079(13) | 10-Feb-08 | 0.00                                                   | 0.74            |
| DJ694;3.3,1077     | Bg2;2.1,1079(13) | 10-Feb-08 | 0.01                                                   | 2.63            |
| DJ694;3.3,1077     | Bg2;2.1,1079(14) | 10-Feb-08 | 0.00                                                   | 1.12            |
| DJ694;3.3,1077     | Bg2;2.1,1079(14) | 10-Feb-08 | 0.01                                                   | 1.67            |
| DJ694;3.3,1077     | Bg2;2.1,1079(14) | 10-Feb-08 | 0.01                                                   | 2.99            |
| DJ694;2.1,1077     | Bg2;3.3,1079     | 19-Dec-07 | 0.10                                                   | 17.53           |
| DJ694;2.1,1079(14) | Bg2;3.3,1077     | 19-Dec-07 | 0.19                                                   | 32.56           |

**DJ694 + 2 copies 2.1 + 2 copies DJ1079**

|                    |                  |           |      |        |
|--------------------|------------------|-----------|------|--------|
| DJ694;2.1,1079(13) | Bg2;2.1,1079(14) | 19-Dec-07 | 0.05 | 8.32   |
| DJ694;2.1,1079(13) | Bg2;2.1,1079(14) | 19-Dec-07 | 0.05 | 8.62   |
| DJ694;2.1,1079(13) | Bg2;2.1,1079(14) | 19-Dec-07 | 0.01 | 2.25   |
| DJ694;2.1,1079(14) | Bg2;2.1,1079(13) | 19-Dec-07 | 0.08 | 14.28  |
| DJ694;2.1,1079(14) | Bg2;2.1,1079(13) | 19-Dec-07 | 0.04 | 6.32   |
| DJ694;2.1,1079(14) | Bg2;2.1,1079(14) | 19-Dec-07 | 0.10 | 16.78  |
| DJ694;2.1,1079(14) | Bg2;2.1,1079(14) | 19-Dec-07 | 0.04 | 7.27   |
| DJ694;2.1,1079(14) | Bg2;2.1,1079(14) | 19-Dec-07 | 0.03 | 4.78   |
| DJ694;2.1,1079(14) | Bg2;2.1,1079(14) | 19-Dec-07 | 0.06 | 10.07  |
| DJ694;2.1,1079(13) | Bg2;2.1,1079(13) | 10-Feb-08 | 0.00 | 0.05   |
| DJ694;2.1,1079(13) | Bg2;2.1,1079(13) | 10-Feb-08 | 0.01 | 2.70   |
| DJ694;2.1,1079(13) | Bg2;2.1,1079(13) | 10-Feb-08 | 0.01 | 1.38   |
| DJ694;2.1,1079(13) | Bg2;2.1,1079(14) | 10-Feb-08 | 0.00 | 0.00   |
| DJ694;2.1,1079(13) | Bg2;2.1,1079(14) | 10-Feb-08 | 0.01 | 1.25   |
| DJ694;2.1,1079(13) | Bg2;2.1,1079(14) | 10-Feb-08 | 0.01 | 2.15   |
| DJ694;2.1,1079(14) | Bg2;2.1,1079(13) | 10-Feb-08 | 0.01 | 3.09   |
| DJ694;2.1,1079(14) | Bg2;2.1,1079(13) | 10-Feb-08 | 0.03 | 7.32   |
| DJ694;2.1,1079(14) | Bg2;2.1,1079(13) | 10-Feb-08 | 0.04 | 9.16   |
| DJ694;2.1,1079(14) | Bg2;2.1,1079(14) | 10-Feb-08 | 0.03 | 6.16   |
| DJ694;2.1,1079(14) | Bg2;2.1,1079(14) | 10-Feb-08 | 0.04 | 9.07   |
| DJ694;2.1,1079(14) | Bg2;2.1,1079(14) | 10-Feb-08 | 0.01 | 2.82   |
| DJ694;2.1,1079(14) | Bg2;2.1,1079(13) | 19-Dec-07 | 0.35 | 59.85  |
| DJ694;2.1,1079(14) | Bg2;2.1,1079(14) | 19-Dec-07 | 0.16 | 27.82  |
| DJ694;2.1,1079(14) | Bg2;2.1,1079(14) | 19-Dec-07 | 0.98 | 166.18 |

**DJ694 + 2.1 + 3.3 + 2 copies DJ1079**

|                    |              |           |      |       |
|--------------------|--------------|-----------|------|-------|
| DJ694;2.1,1079(13) | Bg2;3.3,1079 | 19-Dec-07 | 0.20 | 33.24 |
| DJ694;2.1,1079(13) | Bg2;3.3,1079 | 19-Dec-07 | 0.08 | 14.37 |
| DJ694;2.1,1079(13) | Bg2;3.3,1079 | 19-Dec-07 | 0.03 | 5.05  |
| DJ694;2.1,1079(14) | Bg2;3.3,1079 | 19-Dec-07 | 0.02 | 3.57  |
| DJ694;2.1,1079(14) | Bg2;3.3,1079 | 19-Dec-07 | 0.08 | 12.95 |

L1 larvae

| Parents            |              | Date      | Specific activity<br>$\Delta$ mOD/min/ $\mu$ g protein | % DJ694 control |
|--------------------|--------------|-----------|--------------------------------------------------------|-----------------|
| Male               | Female       |           |                                                        |                 |
| DJ694;2.1,1079(14) | Bg2;3.3,1079 | 19-Dec-07 | 0.04                                                   | 6.18            |
| DJ694;2.1,1079(14) | Bg2;3.3,1079 | 19-Dec-07 | 0.01                                                   | 1.30            |
| DJ694;2.1,1079(14) | Bg2;3.3,1079 | 19-Dec-07 | 0.01                                                   | 2.26            |
| DJ694;2.1,1079(14) | Bg2;3.3,1079 | 19-Dec-07 | 0.01                                                   | 1.17            |
| DJ694;2.1,1079(13) | Bg2;3.3,1079 | 10-Feb-08 | 0.01                                                   | 1.20            |
| DJ694;2.1,1079(13) | Bg2;3.3,1079 | 10-Feb-08 | 0.00                                                   | 0.41            |
| DJ694;2.1,1079(13) | Bg2;3.3,1079 | 10-Feb-08 | 0.00                                                   | 0.59            |
| DJ694;2.1,1079(14) | Bg2;3.3,1079 | 10-Feb-08 | 0.00                                                   | 0.00            |
| DJ694;2.1,1079(14) | Bg2;3.3,1079 | 10-Feb-08 | 0.03                                                   | 7.11            |
| DJ694;2.1,1079(14) | Bg2;3.3,1079 | 10-Feb-08 | 0.02                                                   | 4.05            |

**DJ694 + 2 copies 3.3 + 2 copies DJ1077**

|                |              |           |      |       |
|----------------|--------------|-----------|------|-------|
| DJ694;3.3,1077 | Bg2;3.3,1077 | 13-Nov-07 | 0.03 | 3.58  |
| DJ694;3.3,1077 | Bg2;3.3,1077 | 13-Nov-07 | 0.04 | 4.17  |
| DJ694;3.3,1077 | Bg2;3.3,1077 | 13-Nov-07 | 0.23 | 24.58 |
| DJ694;3.3,1077 | Bg2;3.3,1077 | 30-Nov-07 | 0.07 | 11.80 |
| DJ694;3.3,1077 | Bg2;3.3,1077 | 30-Nov-07 | 0.02 | 2.92  |
| DJ694;3.3,1077 | Bg2;3.3,1077 | 30-Nov-07 | 0.07 | 11.80 |
| DJ694;3.3,1077 | Bg2;3.3,1077 | 19-Dec-07 | 0.09 | 15.24 |
| DJ694;3.3,1077 | Bg2;3.3,1077 | 19-Dec-07 | 0.03 | 4.29  |
| DJ694;3.3,1077 | Bg2;3.3,1077 | 19-Dec-07 | 0.01 | 2.23  |
| DJ694;3.3,1077 | Bg2;3.3,1077 | 19-Dec-07 | 0.03 | 4.89  |
| DJ694;3.3,1077 | Bg2;3.3,1077 | 10-Feb-08 | 0.04 | 8.49  |
| DJ694;3.3,1077 | Bg2;3.3,1077 | 10-Feb-08 | 0.00 | 0.66  |
| DJ694;3.3,1077 | Bg2;3.3,1077 | 10-Feb-08 | 0.05 | 10.95 |
| DJ694;3.3,1077 | Bg2;3.3,1077 | 22-Feb-08 | 0.04 | 5.61  |
| DJ694;3.3,1077 | Bg2;3.3,1077 | 22-Feb-08 | 0.00 | 0.38  |
| DJ694;3.3,1077 | Bg2;3.3,1077 | 22-Feb-08 | 0.00 | 0.71  |
| DJ694;3.3,1077 | Bg2;3.3,1077 | 19-Dec-07 | 0.14 | 23.44 |
| DJ694;3.3,1077 | Bg2;3.3,1077 | 19-Dec-07 | 0.18 | 30.35 |

**DJ694 + 2 copies 3.3 + DJ1077 + DJ1079**

|                |              |           |      |       |
|----------------|--------------|-----------|------|-------|
| DJ694;3.3,1077 | Bg2;3.3,1079 | 13-Nov-07 | 0.13 | 14.07 |
| DJ694;3.3,1077 | Bg2;3.3,1079 | 13-Nov-07 | 0.13 | 14.33 |
| DJ694;3.3,1077 | Bg2;3.3,1079 | 13-Nov-07 | 0.03 | 3.12  |
| DJ694;3.3,1077 | Bg2;3.3,1079 | 30-Nov-07 | 0.18 | 28.25 |
| DJ694;3.3,1077 | Bg2;3.3,1079 | 30-Nov-07 | 0.09 | 14.83 |
| DJ694;3.3,1077 | Bg2;3.3,1079 | 30-Nov-07 | 0.02 | 3.58  |
| DJ694;3.3,1077 | Bg2;3.3,1079 | 19-Dec-07 | 0.02 | 4.21  |
| DJ694;3.3,1077 | Bg2;3.3,1079 | 19-Dec-07 | 0.01 | 1.59  |
| DJ694;3.3,1077 | Bg2;3.3,1079 | 19-Dec-07 | 0.00 | 0.57  |
| DJ694;3.3,1077 | Bg2;3.3,1079 | 19-Dec-07 | 0.01 | 2.31  |

L1 larvae

| Parents                                       |                  | Date      | Specific activity<br>$\Delta$ mOD/min/ $\mu$ g protein | % DJ694 control |
|-----------------------------------------------|------------------|-----------|--------------------------------------------------------|-----------------|
| Male                                          | Female           |           |                                                        |                 |
| DJ694;3.3,1077                                | Bg2;3.3,1079     | 19-Dec-07 | 0.02                                                   | 3.61            |
| DJ694;3.3,1077                                | Bg2;3.3,1079     | 19-Dec-07 | 0.01                                                   | 2.17            |
| DJ694;3.3,1077                                | Bg2;3.3,1079     | 10-Feb-08 | 0.01                                                   | 1.18            |
| DJ694;3.3,1077                                | Bg2;3.3,1079     | 10-Feb-08 | 0.00                                                   | 0.42            |
| DJ694;3.3,1077                                | Bg2;3.3,1079     | 10-Feb-08 | 0.02                                                   | 4.07            |
| <b>DJ694 + 2.1 + 3.3 + DJ1077 + DJ1080</b>    |                  |           |                                                        |                 |
| DJ694;1077,1080                               | Bg2;2.1,3.3      | 15-Jun-07 | 0.39                                                   | 11.16           |
| DJ694;1077,1080                               | Bg2;2.1,3.3      | 15-Jun-07 | 0.36                                                   | 10.10           |
| DJ694;1077,1080                               | Bg2;2.1,3.3      | 15-Jun-07 | 0.46                                                   | 12.98           |
| DJ694;1077,1080                               | Bg2;2.1,3.3      | 15-Jun-07 | 0.33                                                   | 9.25            |
| DJ694;1077,1080                               | Bg2;2.1,3.3      | 04-Jul-07 | 0.21                                                   | 45.21           |
| DJ694;1077,1080                               | Bg2;2.1,3.3      | 04-Jul-07 | 0.05                                                   | 11.90           |
| DJ694;1077,1080                               | Bg2;2.1,3.3      | 04-Jul-07 | 0.33                                                   | 71.63           |
| DJ694;2.1,3.3                                 | Bg2;1077,1080    | 31-May-07 | 0.02                                                   | 1.58            |
| DJ694;2.1,3.3                                 | Bg2;1077,1080    | 31-May-07 | 0.00                                                   | 0.00            |
| DJ694;2.1,3.3                                 | Bg2;1077,1080    | 31-May-07 | 0.07                                                   | 5.90            |
| DJ694;2.1,3.3                                 | Bg2;1077,1080    | 31-May-07 | 0.01                                                   | 0.47            |
| <b>DJ694 + 2.1 + 2 copies DJ1077 + DJ1079</b> |                  |           |                                                        |                 |
| DJ694;1077,1079                               | Bg2;2.1,1077     | 19-Dec-07 | 0.02                                                   | 4.21            |
| DJ694;1077,1079                               | Bg2;2.1,1077     | 19-Dec-07 | 0.05                                                   | 8.73            |
| DJ694;1077,1079                               | Bg2;2.1,1077     | 19-Dec-07 | 0.01                                                   | 1.21            |
| <b>DJ694 + 2.1 + DJ1077 + 2 copies DJ1079</b> |                  |           |                                                        |                 |
| DJ694;1077,1079                               | Bg2;2.1,1079(14) | 19-Dec-07 | 0.01                                                   | 2.41            |
| DJ694;1077,1079                               | Bg2;2.1,1079(14) | 19-Dec-07 | 0.01                                                   | 1.03            |
| DJ694;1077,1079                               | Bg2;2.1,1079(14) | 19-Dec-07 | 0.00                                                   | 0.72            |
| <b>DJ694 + 3.3 + 2 copies DJ1077 + DJ1079</b> |                  |           |                                                        |                 |
| DJ694;1077,1079                               | Bg2;3.3,1077     | 19-Dec-07 | 0.01                                                   | 0.85            |
| DJ694;1077,1079                               | Bg2;3.3,1077     | 19-Dec-07 | 0.00                                                   | 0.47            |
| DJ694;1077,1079                               | Bg2;3.3,1077     | 19-Dec-07 | 0.00                                                   | 0.47            |
| <b>DJ694 + 3.3 + DJ1077 + 2 copies DJ1079</b> |                  |           |                                                        |                 |
| DJ694;1077,1079                               | Bg2;3.3,1079     | 19-Dec-07 | 0.00                                                   | 0.00            |
| DJ694;1077,1079                               | Bg2;3.3,1079     | 19-Dec-07 | 0.01                                                   | 1.60            |
| DJ694;1077,1079                               | Bg2;3.3,1079     | 19-Dec-07 | 0.00                                                   | 0.32            |
| <b>DJ694 + 2.1 + 2 copies DJ1077 + DJ1080</b> |                  |           |                                                        |                 |
| DJ694;1077,1080                               | Bg2;2.1,1077     | 10-Feb-08 | 0.01                                                   | 2.44            |
| DJ694;1077,1080                               | Bg2;2.1,1077     | 10-Feb-08 | 0.03                                                   | 7.19            |
| DJ694;1077,1080                               | Bg2;2.1,1077     | 10-Feb-08 | 0.02                                                   | 3.44            |
| DJ694;2.1,1077                                | Bg2;1077,1080    | 10-Feb-08 | 0.01                                                   | 1.78            |
| DJ694;2.1,1077                                | Bg2;1077,1080    | 10-Feb-08 | 0.00                                                   | 0.04            |

L1 larvae

| Parents                                       |                  | Date      | Specific activity<br>$\Delta$ mOD/min/ $\mu$ g protein | % DJ694 control |
|-----------------------------------------------|------------------|-----------|--------------------------------------------------------|-----------------|
| Male                                          | Female           |           |                                                        |                 |
| DJ694;2.1,1077                                | Bg2;1077,1080    | 10-Feb-08 | 0.02                                                   | 3.57            |
| <b>DJ694 + 2.1 + DJ1077 + DJ1079 + DJ1080</b> |                  |           |                                                        |                 |
| DJ694;1077,1080                               | Bg2;2.1,1079(13) | 10-Feb-08 | 0.06                                                   | 14.46           |
| DJ694;1077,1080                               | Bg2;2.1,1079(13) | 10-Feb-08 | 0.03                                                   | 6.18            |
| DJ694;1077,1080                               | Bg2;2.1,1079(13) | 10-Feb-08 | 0.31                                                   | 69.83           |
| DJ694;1077,1080                               | Bg2;2.1,1079(14) | 10-Feb-08 | 0.03                                                   | 6.59            |
| DJ694;1077,1080                               | Bg2;2.1,1079(14) | 10-Feb-08 | 0.03                                                   | 7.35            |
| DJ694;1077,1080                               | Bg2;2.1,1079(14) | 10-Feb-08 | 0.06                                                   | 14.54           |
| DJ694;2.1,1079(14)                            | Bg2;1077,1080    | 10-Feb-08 | 0.13                                                   | 29.15           |
| DJ694;2.1,1079(14)                            | Bg2;1077,1080    | 10-Feb-08 | 0.10                                                   | 22.92           |
| DJ694;2.1,1079(14)                            | Bg2;1077,1080    | 10-Feb-08 | 0.04                                                   | 8.86            |
| <b>DJ694 + 3.3 + 2 copies DJ1077 + DJ1080</b> |                  |           |                                                        |                 |
| DJ694;1077,1080                               | Bg2;3.3,1077     | 10-Feb-08 | 0.01                                                   | 2.64            |
| DJ694;1077,1080                               | Bg2;3.3,1077     | 10-Feb-08 | 0.01                                                   | 2.15            |
| DJ694;1077,1080                               | Bg2;3.3,1077     | 10-Feb-08 | 0.00                                                   | 0.17            |
| DJ694;3.3,1077                                | Bg2;1077,1080    | 10-Feb-08 | 0.00                                                   | -0.07           |
| DJ694;3.3,1077                                | Bg2;1077,1080    | 10-Feb-08 | 0.01                                                   | 1.27            |
| DJ694;3.3,1077                                | Bg2;1077,1080    | 10-Feb-08 | 0.00                                                   | 0.57            |
| <b>DJ694 + 3.3 + DJ1077 + DJ1079 + DJ1080</b> |                  |           |                                                        |                 |
| DJ694;1077,1080                               | Bg2;3.3,1079     | 10-Feb-08 | 0.04                                                   | 9.73            |
| DJ694;1077,1080                               | Bg2;3.3,1079     | 10-Feb-08 | 0.04                                                   | 8.36            |
| DJ694;1077,1080                               | Bg2;3.3,1079     | 10-Feb-08 | 0.02                                                   | 5.03            |
| <b>DJ694 + 2.1 + DJ1077 + DJ1080 + DJ1083</b> |                  |           |                                                        |                 |
| DJ694;2.1,1077                                | Bg2;1080,1083    | 10-Feb-08 | 0.00                                                   | 0.00            |
| DJ694;2.1,1077                                | Bg2;1080,1083    | 10-Feb-08 | 0.00                                                   | 0.90            |
| DJ694;2.1,1077                                | Bg2;1080,1083    | 10-Feb-08 | 0.01                                                   | 1.44            |
| <b>DJ694 + 2.1 + DJ1077 + DJ1079 + DJ1080</b> |                  |           |                                                        |                 |
| DJ694;2.1,1079(13)                            | Bg2;1077,1080    | 10-Feb-08 | 0.01                                                   | 2.07            |
| DJ694;2.1,1079(13)                            | Bg2;1077,1080    | 10-Feb-08 | 0.00                                                   | 0.71            |
| DJ694;2.1,1079(13)                            | Bg2;1077,1080    | 10-Feb-08 | 0.00                                                   | 0.34            |
| <b>DJ694 + 2.1 + DJ1079 + DJ1080 + DJ1083</b> |                  |           |                                                        |                 |
| DJ694;2.1,1079(13)                            | Bg2;1080,1083    | 10-Feb-08 | 0.00                                                   | 0.52            |
| DJ694;2.1,1079(13)                            | Bg2;1080,1083    | 10-Feb-08 | 0.00                                                   | 0.00            |
| DJ694;2.1,1079(13)                            | Bg2;1080,1083    | 10-Feb-08 | 0.00                                                   | 0.00            |
| DJ694;2.1,1079(14)                            | Bg2;1080,1083    | 10-Feb-08 | 0.17                                                   | 38.70           |
| DJ694;2.1,1079(14)                            | Bg2;1080,1083    | 10-Feb-08 | 0.04                                                   | 9.03            |
| <b>DJ694 + 3.3 + DJ1077 + DJ1080 + DJ1083</b> |                  |           |                                                        |                 |
| DJ694;3.3,1077                                | Bg2;1080,1083    | 10-Feb-08 | 0.00                                                   | 0.97            |
| DJ694;3.3,1077                                | Bg2;1080,1083    | 10-Feb-08 | 0.02                                                   | 3.84            |

L1 larvae

| <b>Parents</b> |               | <b>Date</b> | <b>Specific activity<br/><math>\Delta</math>mOD/min/<math>\mu</math>g protein</b> | <b>% DJ694 control</b> |
|----------------|---------------|-------------|-----------------------------------------------------------------------------------|------------------------|
| <b>Male</b>    | <b>Female</b> |             |                                                                                   |                        |
| DJ694;3.3,1077 | Bg2;1080,1083 | 10-Feb-08   | 0.01                                                                              | 1.82                   |

*Supplemental Table 5: UAS-lacZ assay L3 data set.*

% DJ694 control: specific activity normalized to the positive control, bolded values are significantly different ( $p < 0.05$ ) from the positive control.

| Parents                        |               | Date     | Specific activity                 | % DJ694 control |
|--------------------------------|---------------|----------|-----------------------------------|-----------------|
| Male                           | Female        |          | $\Delta$ mOD/min/ $\mu$ g protein |                 |
| <b>DJ694 + DJ1077</b>          |               |          |                                   |                 |
| DJ694;1077                     | Bg2           | 07-06-15 | 6.66                              | <b>48.45</b>    |
| DJ694;1077                     | Bg2           | 07-06-15 | 6.72                              | <b>48.91</b>    |
| DJ694;1077                     | Bg2           | 07-06-15 | 6.31                              | <b>45.87</b>    |
| DJ694;1077                     | Bg2           | 07-07-04 | 2.91                              | 79.29           |
| DJ694;1077                     | Bg2           | 07-07-04 | 1.74                              | 47.37           |
| DJ694;1077                     | Bg2           | 07-07-04 | 3.27                              | 88.99           |
| DJ694;1077                     | Bg2           | 07-05-31 | 1.59                              | <b>48.94</b>    |
| DJ694;1077                     | Bg2           | 07-05-31 | 2.34                              | <b>71.86</b>    |
| DJ694;1077                     | Bg2           | 07-05-31 | 2.30                              | <b>70.58</b>    |
| DJ694;1077                     | Bg2           | 07-05-31 | 2.26                              | <b>69.53</b>    |
| DJ694;1077                     | Bg2           | 07-05-31 | 1.45                              | <b>44.47</b>    |
| <b>DJ694 + DJ1080</b>          |               |          |                                   |                 |
| DJ694;1080                     | Bg2           | 07-06-15 | 6.22                              | <b>45.23</b>    |
| DJ694;1080                     | Bg2           | 07-06-15 | 9.28                              | <b>67.52</b>    |
| DJ694;1080                     | Bg2           | 07-06-15 | 9.00                              | <b>65.49</b>    |
| DJ694;1080                     | Bg2           | 07-05-31 | 1.81                              | <b>55.72</b>    |
| DJ694;1080                     | Bg2           | 07-05-31 | 1.74                              | <b>53.43</b>    |
| DJ694;1080                     | Bg2           | 07-05-31 | 1.41                              | <b>43.18</b>    |
| DJ694;1080                     | Bg2           | 07-05-31 | 1.68                              | <b>51.60</b>    |
| DJ694;1080                     | Bg2           | 07-05-31 | 2.22                              | <b>68.14</b>    |
| DJ694;1080                     | Bg2           | 07-07-04 | 2.22                              | 60.38           |
| DJ694;1080                     | Bg2           | 07-07-04 | 1.07                              | 29.06           |
| DJ694;1080                     | Bg2           | 07-07-04 | 4.68                              | 127.42          |
| <b>DJ694 + DJ1077 + DJ1080</b> |               |          |                                   |                 |
| DJ694                          | Bg2;1077,1080 | 07-08-03 | 1.86                              | 61.46           |
| DJ694                          | Bg2;1077,1080 | 07-08-03 | 2.65                              | 87.58           |
| DJ694                          | Bg2;1077,1080 | 07-08-03 | 2.04                              | 67.37           |
| DJ694                          | Bg2;1077,1080 | 07-08-15 | 1.63                              | 139.03          |
| DJ694                          | Bg2;1077,1080 | 07-08-15 | 0.82                              | 69.63           |
| DJ694                          | Bg2;1077,1080 | 07-08-15 | 1.25                              | 107.03          |
| DJ694                          | Bg2;1077,1080 | 07-07-30 | 1.38                              | 91.59           |
| DJ694                          | Bg2;1077,1080 | 07-07-30 | 1.11                              | 73.76           |
| DJ694                          | Bg2;1077,1080 | 07-07-30 | 1.12                              | 74.23           |
| <b>DJ694 + DJ1080 + DJ1083</b> |               |          |                                   |                 |
| DJ694                          | Bg2;1080,1083 | 07-06-15 | 11.19                             | <b>81.39</b>    |
| DJ694                          | Bg2;1080,1083 | 07-06-15 | 5.20                              | <b>37.85</b>    |
| DJ694                          | Bg2;1080,1083 | 07-06-15 | 7.24                              | <b>52.68</b>    |
| DJ694                          | Bg2;1080,1083 | 07-07-04 | 3.06                              | <b>83.43</b>    |



L3 larvae

| Parents                                 |               | Date     | Specific activity<br>$\Delta$ mOD/min/ $\mu$ g protein | % DJ694 control |
|-----------------------------------------|---------------|----------|--------------------------------------------------------|-----------------|
| Male                                    | Female        |          |                                                        |                 |
| DJ694                                   | Bg2;1080,1083 | 07-07-04 | 2.88                                                   | <b>78.39</b>    |
| DJ694                                   | Bg2;1080,1083 | 07-07-04 | 2.84                                                   | <b>77.29</b>    |
| DJ694                                   | Bg2;1080,1083 | 07-07-12 | 1.15                                                   | 74.09           |
| DJ694                                   | Bg2;1080,1083 | 07-07-12 | 1.10                                                   | 70.90           |
| DJ694                                   | Bg2;1080,1083 | 07-07-12 | 1.60                                                   | 102.61          |
| <b>DJ694 + DJ1077 + DJ1079</b>          |               |          |                                                        |                 |
| DJ694;1077,1079                         | Bg2           | 07-08-15 | 0.89                                                   | <b>76.33</b>    |
| DJ694;1077,1079                         | Bg2           | 07-08-15 | 0.84                                                   | <b>71.27</b>    |
| DJ694;1077,1079                         | Bg2           | 07-08-15 | 1.07                                                   | <b>91.17</b>    |
| DJ694;1077,1079                         | Bg2           | 07-06-15 | 3.86                                                   | <b>28.07</b>    |
| DJ694;1077,1079                         | Bg2           | 07-06-15 | 4.17                                                   | <b>30.33</b>    |
| DJ694;1077,1079                         | Bg2           | 07-06-15 | 3.70                                                   | <b>26.93</b>    |
| DJ694;1077,1079                         | Bg2           | 07-07-04 | 1.28                                                   | <b>34.79</b>    |
| DJ694;1077,1079                         | Bg2           | 07-07-04 | 2.65                                                   | <b>72.29</b>    |
| DJ694;1077,1079                         | Bg2           | 07-07-04 | 2.55                                                   | <b>69.33</b>    |
| <b>DJ694 + DJ1077 + DJ1080</b>          |               |          |                                                        |                 |
| DJ694;1077,1080                         | Bg2           | 07-06-15 | 5.72                                                   | <b>41.59</b>    |
| DJ694;1077,1080                         | Bg2           | 07-06-15 | 7.24                                                   | <b>52.65</b>    |
| DJ694;1077,1080                         | Bg2           | 07-06-15 | 7.38                                                   | <b>53.66</b>    |
| DJ694;1077,1080                         | Bg2           | 07-07-04 | 2.89                                                   | <b>78.70</b>    |
| DJ694;1077,1080                         | Bg2           | 07-07-04 | 2.24                                                   | <b>60.91</b>    |
| DJ694;1077,1080                         | Bg2           | 07-07-04 | 2.27                                                   | <b>61.80</b>    |
| <b>DJ694 + 2 copies DJ1077 + DJ1080</b> |               |          |                                                        |                 |
| DJ694;1077                              | Bg2;1077,1080 | 07-08-03 | 1.07                                                   | <b>35.23</b>    |
| DJ694;1077                              | Bg2;1077,1080 | 07-08-03 | 0.49                                                   | <b>16.35</b>    |
| DJ694;1077                              | Bg2;1077,1080 | 07-08-03 | 0.48                                                   | <b>15.81</b>    |
| DJ694;1077                              | Bg2;1077,1080 | 07-08-15 | 0.24                                                   | <b>20.49</b>    |
| DJ694;1077                              | Bg2;1077,1080 | 07-08-15 | 0.82                                                   | <b>70.27</b>    |
| DJ694;1077                              | Bg2;1077,1080 | 07-08-15 | 0.60                                                   | <b>51.01</b>    |
| DJ694;1077                              | Bg2;1077,1080 | 07-07-12 | 0.58                                                   | <b>37.30</b>    |
| DJ694;1077                              | Bg2;1077,1080 | 07-07-12 | 0.38                                                   | <b>24.72</b>    |
| DJ694;1077                              | Bg2;1077,1080 | 07-07-12 | 0.57                                                   | <b>36.87</b>    |
| DJ694;1077                              | Bg2;1077,1080 | 07-07-30 | 0.97                                                   | 64.11           |
| DJ694;1077                              | Bg2;1077,1080 | 07-07-30 | 1.19                                                   | 79.02           |
| DJ694;1077                              | Bg2;1077,1080 | 07-07-30 | 0.92                                                   | 61.25           |
| <b>DJ694 + DJ1077 + DJ1080 + DJ1083</b> |               |          |                                                        |                 |
| DJ694;1077                              | Bg2;1080,1083 | 07-08-03 | 0.61                                                   | <b>20.01</b>    |
| DJ694;1077                              | Bg2;1080,1083 | 07-08-03 | 0.58                                                   | <b>19.11</b>    |
| DJ694;1077                              | Bg2;1080,1083 | 07-08-03 | 0.80                                                   | <b>26.59</b>    |

L3 larvae

| Parents                                          |               | Date     | Specific activity<br>$\Delta$ mOD/min/ $\mu$ g protein | % DJ694 control |
|--------------------------------------------------|---------------|----------|--------------------------------------------------------|-----------------|
| Male                                             | Female        |          |                                                        |                 |
| DJ694;1077                                       | Bg2;1080,1083 | 07-08-15 | 0.51                                                   | 43.82           |
| DJ694;1077                                       | Bg2;1080,1083 | 07-08-15 | 0.67                                                   | 56.90           |
| DJ694;1077                                       | Bg2;1080,1083 | 07-08-15 | 0.56                                                   | 47.94           |
| DJ694;1077                                       | Bg2;1080,1083 | 07-07-30 | 0.59                                                   | 39.36           |
| DJ694;1077                                       | Bg2;1080,1083 | 07-07-30 | 0.54                                                   | 35.62           |
| DJ694;1077                                       | Bg2;1080,1083 | 07-07-30 | 0.72                                                   | 47.54           |
| <b>DJ694 + DJ1077 + 2 copies DJ1080</b>          |               |          |                                                        |                 |
| DJ694;1080                                       | Bg2;1077,1080 | 07-08-03 | 0.95                                                   | 31.33           |
| DJ694;1080                                       | Bg2;1077,1080 | 07-08-03 | 0.37                                                   | 12.34           |
| DJ694;1080                                       | Bg2;1077,1080 | 07-08-03 | 0.72                                                   | 23.85           |
| DJ694;1080                                       | Bg2;1077,1080 | 07-08-15 | 0.22                                                   | 18.64           |
| DJ694;1080                                       | Bg2;1077,1080 | 07-08-15 | 0.26                                                   | 22.10           |
| DJ694;1080                                       | Bg2;1077,1080 | 07-08-15 | 0.28                                                   | 23.54           |
| DJ694;1080                                       | Bg2;1077,1080 | 07-07-12 | 0.66                                                   | 42.43           |
| DJ694;1080                                       | Bg2;1077,1080 | 07-07-12 | 0.70                                                   | 45.14           |
| DJ694;1080                                       | Bg2;1077,1080 | 07-07-12 | 0.67                                                   | 43.04           |
| DJ694;1080                                       | Bg2;1077,1080 | 07-07-30 | 0.94                                                   | 62.32           |
| DJ694;1080                                       | Bg2;1077,1080 | 07-07-30 | 0.73                                                   | 48.51           |
| DJ694;1080                                       | Bg2;1077,1080 | 07-07-30 | 0.60                                                   | 39.58           |
| <b>DJ694 + 2 copies DJ1080 + DJ1083</b>          |               |          |                                                        |                 |
| DJ694;1080                                       | Bg2;1080,1083 | 07-08-03 | 0.98                                                   | 32.35           |
| DJ694;1080                                       | Bg2;1080,1083 | 07-08-03 | 1.02                                                   | 33.84           |
| DJ694;1080                                       | Bg2;1080,1083 | 07-08-03 | 0.95                                                   | 31.45           |
| DJ694;1080                                       | Bg2;1080,1083 | 07-08-15 | 1.44                                                   | 122.79          |
| DJ694;1080                                       | Bg2;1080,1083 | 07-08-15 | 0.93                                                   | 79.54           |
| DJ694;1080                                       | Bg2;1080,1083 | 07-08-15 | 0.96                                                   | 82.02           |
| DJ694;1080                                       | Bg2;1080,1083 | 07-07-30 | 0.82                                                   | 54.31           |
| DJ694;1080                                       | Bg2;1080,1083 | 07-07-30 | 0.59                                                   | 38.93           |
| DJ694;1080                                       | Bg2;1080,1083 | 07-07-30 | 0.83                                                   | 55.33           |
| <b>DJ694 + 2 copies DJ1077 + DJ1079 + DJ1080</b> |               |          |                                                        |                 |
| DJ694;1077,1079                                  | Bg2;1077,1080 | 07-06-15 | 2.07                                                   | 15.04           |
| DJ694;1077,1079                                  | Bg2;1077,1080 | 07-06-15 | 1.84                                                   | 13.38           |
| DJ694;1077,1079                                  | Bg2;1077,1080 | 07-06-15 | 2.27                                                   | 16.53           |
| DJ694;1077,1079                                  | Bg2;1077,1080 | 07-07-04 | 0.91                                                   | 24.68           |
| DJ694;1077,1079                                  | Bg2;1077,1080 | 07-07-04 | 0.46                                                   | 12.49           |
| DJ694;1077,1079                                  | Bg2;1077,1080 | 07-07-04 | 0.78                                                   | 21.24           |
| <b>DJ694 + DJ1077 + DJ1079 + DJ1080 + DJ1083</b> |               |          |                                                        |                 |
| DJ694;1077,1079                                  | Bg2;1080,1083 | 07-07-04 | 1.33                                                   | 36.11           |
| DJ694;1077,1079                                  | Bg2;1080,1083 | 07-07-04 | 0.90                                                   | 24.60           |

L3 larvae

| <b>Parents</b>                                   |               | <b>Date</b> | <b>Specific activity<br/><math>\Delta</math>mOD/min/<math>\mu</math>g protein</b> | <b>% DJ694 control</b> |
|--------------------------------------------------|---------------|-------------|-----------------------------------------------------------------------------------|------------------------|
| <b>Male</b>                                      | <b>Female</b> |             |                                                                                   |                        |
| DJ694;1077,1079                                  | Bg2;1080,1083 | 07-07-04    | 0.68                                                                              | <b>18.46</b>           |
| DJ694;1077,1079                                  | Bg2;1080,1083 | 07-07-12    | 0.66                                                                              | <b>42.60</b>           |
| DJ694;1077,1079                                  | Bg2;1080,1083 | 07-07-12    | 0.55                                                                              | <b>35.12</b>           |
| DJ694;1077,1079                                  | Bg2;1080,1083 | 07-07-12    | 0.44                                                                              | <b>28.11</b>           |
| <b>DJ694 + 2 copies DJ1077 + 2 copies DJ1080</b> |               |             |                                                                                   |                        |
| DJ694;1077,1080                                  | Bg2;1077,1080 | 07-06-15    | 3.33                                                                              | <b>24.20</b>           |
| DJ694;1077,1080                                  | Bg2;1077,1080 | 07-06-15    | 2.14                                                                              | <b>15.59</b>           |
| DJ694;1077,1080                                  | Bg2;1077,1080 | 07-06-15    | 1.87                                                                              | <b>13.57</b>           |
| DJ694;1077,1080                                  | Bg2;1077,1080 | 07-05-31    | 0.80                                                                              | <b>24.55</b>           |
| DJ694;1077,1080                                  | Bg2;1077,1080 | 07-05-31    | 1.00                                                                              | <b>30.58</b>           |
| DJ694;1077,1080                                  | Bg2;1077,1080 | 07-05-31    | 0.76                                                                              | <b>23.45</b>           |
| DJ694;1077,1080                                  | Bg2;1077,1080 | 07-05-31    | 0.82                                                                              | <b>25.25</b>           |
| DJ694;1077,1080                                  | Bg2;1077,1080 | 07-05-31    | 0.53                                                                              | <b>16.42</b>           |
| DJ694;1077,1080                                  | Bg2;1077,1080 | 08-02-10    | 1.82                                                                              | <b>34.88</b>           |
| DJ694;1077,1080                                  | Bg2;1077,1080 | 08-02-10    | 1.19                                                                              | <b>22.82</b>           |
| DJ694;1077,1080                                  | Bg2;1077,1080 | 08-02-10    | 2.14                                                                              | <b>40.93</b>           |
| DJ694;1077,1080                                  | Bg2;1077,1080 | 07-07-04    | 1.36                                                                              | <b>36.92</b>           |
| DJ694;1077,1080                                  | Bg2;1077,1080 | 07-07-04    | 0.83                                                                              | <b>22.67</b>           |
| DJ694;1077,1080                                  | Bg2;1077,1080 | 07-07-04    | 1.34                                                                              | <b>36.61</b>           |
| <b>DJ694 + 2.1</b>                               |               |             |                                                                                   |                        |
| DJ694;2.1                                        | Bg2           | 07-06-15    | 14.15                                                                             | 102.93                 |
| DJ694;2.1                                        | Bg2           | 07-06-15    | 10.12                                                                             | 73.57                  |
| DJ694;2.1                                        | Bg2           | 07-06-15    | 10.19                                                                             | 74.13                  |
| DJ694;2.1                                        | Bg2           | 07-05-31    | 2.09                                                                              | <b>64.24</b>           |
| DJ694;2.1                                        | Bg2           | 07-05-31    | 1.93                                                                              | <b>59.28</b>           |
| DJ694;2.1                                        | Bg2           | 07-05-31    | 1.22                                                                              | <b>37.62</b>           |
| DJ694;2.1                                        | Bg2           | 07-05-31    | 2.84                                                                              | <b>87.24</b>           |
| DJ694;2.1                                        | Bg2           | 07-05-31    | 2.75                                                                              | <b>84.64</b>           |
| DJ694;2.1                                        | Bg2           | 07-07-04    | 4.13                                                                              | 112.38                 |
| DJ694;2.1                                        | Bg2           | 07-07-04    | 2.96                                                                              | 80.61                  |
| DJ694;2.1                                        | Bg2           | 07-07-04    | 3.33                                                                              | 90.68                  |
| <b>DJ694 + 3.3</b>                               |               |             |                                                                                   |                        |
| DJ694;3.3                                        | Bg2           | 07-06-15    | 6.88                                                                              | <b>50.01</b>           |
| DJ694;3.3                                        | Bg2           | 07-06-15    | 6.38                                                                              | <b>46.40</b>           |
| DJ694;3.3                                        | Bg2           | 07-06-15    | 7.77                                                                              | <b>56.50</b>           |
| DJ694;3.3                                        | Bg2           | 07-05-31    | 1.94                                                                              | <b>59.51</b>           |
| DJ694;3.3                                        | Bg2           | 07-05-31    | 2.00                                                                              | <b>61.48</b>           |
| DJ694;3.3                                        | Bg2           | 07-05-31    | 2.72                                                                              | <b>83.64</b>           |
| DJ694;3.3                                        | Bg2           | 07-05-31    | 1.99                                                                              | <b>61.27</b>           |

L3 larvae

| Parents                           |              | Date     | Specific activity<br>$\Delta$ mOD/min/ $\mu$ g protein | % DJ694 control |
|-----------------------------------|--------------|----------|--------------------------------------------------------|-----------------|
| Male                              | Female       |          |                                                        |                 |
| DJ694;3.3                         | Bg2          | 07-05-31 | 1.88                                                   | 57.92           |
| DJ694;3.3                         | Bg2          | 07-07-04 | 3.51                                                   | 95.59           |
| DJ694;3.3                         | Bg2          | 07-07-04 | 2.47                                                   | 67.41           |
| DJ694;3.3                         | Bg2          | 07-07-04 | 2.13                                                   | 58.01           |
| <b>DJ694 + 2.1 + 3.3</b>          |              |          |                                                        |                 |
| DJ694                             | Bg2;2.1,3.3  | 07-07-04 | 3.58                                                   | 97.63           |
| DJ694                             | Bg2;2.1,3.3  | 07-07-04 | 2.32                                                   | 63.11           |
| DJ694                             | Bg2;2.1,3.3  | 07-07-12 | 1.10                                                   | 70.43           |
| DJ694                             | Bg2;2.1,3.3  | 07-07-12 | 1.42                                                   | 91.17           |
| DJ694                             | Bg2;2.1,3.3  | 07-07-04 | 4.27                                                   | 116.40          |
| DJ694                             | Bg2;2.1,3.3  | 07-07-12 | 2.18                                                   | 140.36          |
| <b>DJ694 + 2 copies 2.1 + 3.3</b> |              |          |                                                        |                 |
| DJ694;2.1                         | Bg2;2.1,3.3  | 07-08-03 | 2.25                                                   | 74.34           |
| DJ694;2.1                         | Bg2;2.1,3.3  | 07-08-03 | 1.42                                                   | 46.85           |
| DJ694;2.1                         | Bg2;2.1,3.3  | 07-08-03 | 2.44                                                   | 80.51           |
| DJ694;2.1                         | Bg2;2.1,3.3  | 07-08-15 | 1.35                                                   | 115.17          |
| DJ694;2.1                         | Bg2;2.1,3.3  | 07-08-15 | 1.26                                                   | 107.81          |
| DJ694;2.1                         | Bg2;2.1,3.3  | 07-08-15 | 0.70                                                   | 59.88           |
| DJ694;2.1                         | Bg2;2.1,3.3  | 07-07-12 | 1.71                                                   | 110.19          |
| DJ694;2.1                         | Bg2;2.1,3.3  | 07-07-12 | 1.31                                                   | 83.96           |
| DJ694;2.1                         | Bg2;2.1,3.3  | 07-07-12 | 1.44                                                   | 92.84           |
| DJ694;2.1                         | Bg2;2.1,3.3  | 07-07-30 | 2.55                                                   | 169.56          |
| DJ694;2.1                         | Bg2;2.1,3.3  | 07-07-30 | 3.27                                                   | 216.85          |
| <b>DJ694 + 2.1 + 2 copies 3.3</b> |              |          |                                                        |                 |
| DJ694;3.3                         | Bg2;2.1,3.3  | 07-08-15 | 0.78                                                   | 66.65           |
| DJ694;3.3                         | Bg2;2.1,3.3  | 07-08-15 | 1.19                                                   | 101.27          |
| DJ694;3.3                         | Bg2;2.1,3.3  | 07-08-15 | 0.62                                                   | 52.70           |
| DJ694;3.3                         | Bg2;2.1,3.3  | 07-07-12 | 1.15                                                   | 73.77           |
| DJ694;3.3                         | Bg2;2.1,3.3  | 07-07-12 | 1.36                                                   | 87.19           |
| DJ694;3.3                         | Bg2;2.1,3.3  | 07-07-12 | 1.18                                                   | 76.10           |
| DJ694;3.3                         | Bg2;2.1,3.3  | 07-07-30 | 0.90                                                   | 59.59           |
| DJ694;3.3                         | Bg2;2.1,3.3  | 07-07-30 | 0.91                                                   | 60.50           |
| DJ694;3.3                         | Bg2;2.1,3.3  | 07-07-30 | 0.92                                                   | 60.80           |
| <b>DJ694 + 2.1 + DJ1077</b>       |              |          |                                                        |                 |
| DJ694                             | Bg2;2.1,1077 | 07-11-13 | 0.70                                                   | 24.65           |
| DJ694                             | Bg2;2.1,1077 | 07-11-13 | 0.80                                                   | 28.17           |
| DJ694                             | Bg2;2.1,1077 | 07-11-13 | 0.73                                                   | 25.65           |
| DJ694                             | Bg2;2.1,1077 | 07-11-30 | 0.70                                                   | 29.17           |
| DJ694                             | Bg2;2.1,1077 | 07-11-30 | 0.74                                                   | 30.87           |

L3 larvae

| Parents                              |                  | Date     | Specific activity<br>$\Delta$ mOD/min/ $\mu$ g protein | % DJ694 control |
|--------------------------------------|------------------|----------|--------------------------------------------------------|-----------------|
| Male                                 | Female           |          |                                                        |                 |
| DJ694                                | Bg2;2.1,1077     | 07-11-30 | 0.90                                                   | 37.79           |
| DJ694;2.1,1077                       | Bg2              | 08-02-22 | 2.31                                                   | 26.70           |
| DJ694;2.1,1077                       | Bg2              | 08-02-22 | 1.41                                                   | 16.28           |
| DJ694;2.1,1077                       | Bg2              | 08-02-22 | 2.24                                                   | 25.86           |
| <b>DJ694 + 2.1 + DJ1079</b>          |                  |          |                                                        |                 |
| DJ694                                | Bg2;2.1,1079(13) | 07-11-13 | 0.74                                                   | 26.04           |
| DJ694                                | Bg2;2.1,1079(13) | 07-11-13 | 1.30                                                   | 45.55           |
| DJ694                                | Bg2;2.1,1079(13) | 07-11-13 | 0.86                                                   | 30.29           |
| DJ694                                | Bg2;2.1,1079(13) | 07-11-30 | 0.59                                                   | 24.82           |
| DJ694                                | Bg2;2.1,1079(13) | 07-11-30 | 0.61                                                   | 25.43           |
| DJ694                                | Bg2;2.1,1079(13) | 07-11-30 | 0.66                                                   | 27.66           |
| DJ694                                | Bg2;2.1,1079(14) | 07-11-13 | 1.42                                                   | 49.73           |
| DJ694                                | Bg2;2.1,1079(14) | 07-11-13 | 1.07                                                   | 37.73           |
| DJ694                                | Bg2;2.1,1079(14) | 07-11-13 | 0.90                                                   | 31.45           |
| DJ694                                | Bg2;2.1,1079(14) | 07-11-30 | 1.28                                                   | 53.50           |
| DJ694                                | Bg2;2.1,1079(14) | 07-11-30 | 0.84                                                   | 35.30           |
| DJ694                                | Bg2;2.1,1079(14) | 07-11-30 | 0.78                                                   | 32.90           |
| DJ694;2.1,1079(13)                   | Bg2              | 08-02-22 | 2.65                                                   | 30.58           |
| DJ694;2.1,1079(13)                   | Bg2              | 08-02-22 | 2.20                                                   | 25.46           |
| DJ694;2.1,1079(13)                   | Bg2              | 08-02-22 | 2.11                                                   | 24.40           |
| <b>DJ694 + 3.3 + DJ1077</b>          |                  |          |                                                        |                 |
| DJ694                                | Bg2;3.3,1077     | 07-11-13 | 0.52                                                   | 18.38           |
| DJ694                                | Bg2;3.3,1077     | 07-11-13 | 0.42                                                   | 14.93           |
| DJ694                                | Bg2;3.3,1077     | 07-11-13 | 0.86                                                   | 30.18           |
| DJ694                                | Bg2;3.3,1077     | 07-11-30 | 0.50                                                   | 21.11           |
| DJ694                                | Bg2;3.3,1077     | 07-11-30 | 0.59                                                   | 24.52           |
| DJ694                                | Bg2;3.3,1077     | 07-11-30 | 0.58                                                   | 24.45           |
| DJ694;3.3,1077                       | Bg2              | 08-02-22 | 1.83                                                   | 21.10           |
| DJ694;3.3,1077                       | Bg2              | 08-02-22 | 2.26                                                   | 26.15           |
| DJ694;3.3,1077                       | Bg2              | 08-02-22 | 3.93                                                   | 45.36           |
| <b>DJ694 + 3.3 + DJ1079</b>          |                  |          |                                                        |                 |
| DJ694                                | Bg2;3.3,1079     | 07-11-13 | 0.90                                                   | 31.54           |
| DJ694                                | Bg2;3.3,1079     | 07-11-13 | 1.56                                                   | 54.63           |
| DJ694                                | Bg2;3.3,1079     | 07-11-13 | 1.46                                                   | 51.43           |
| DJ694                                | Bg2;3.3,1079     | 07-11-30 | 0.93                                                   | 39.15           |
| DJ694                                | Bg2;3.3,1079     | 07-11-30 | 1.11                                                   | 46.44           |
| DJ694                                | Bg2;3.3,1079     | 07-11-30 | 0.72                                                   | 30.10           |
| <b>DJ694 + 2.1 + DJ1077 + DJ1080</b> |                  |          |                                                        |                 |
| DJ694;2.1                            | Bg2;1077,1080    | 07-08-03 | 0.54                                                   | 17.89           |

L3 larvae

| Parents                              |               | Date     | Specific activity<br>$\Delta$ mOD/min/ $\mu$ g protein | % DJ694 control |
|--------------------------------------|---------------|----------|--------------------------------------------------------|-----------------|
| Male                                 | Female        |          |                                                        |                 |
| DJ694;2.1                            | Bg2;1077,1080 | 07-08-03 | 0.55                                                   | 18.09           |
| DJ694;2.1                            | Bg2;1077,1080 | 07-08-03 | 0.46                                                   | 15.11           |
| DJ694;2.1                            | Bg2;1077,1080 | 07-08-15 | 0.73                                                   | 62.06           |
| DJ694;2.1                            | Bg2;1077,1080 | 07-08-15 | 0.41                                                   | 34.80           |
| DJ694;2.1                            | Bg2;1077,1080 | 07-08-15 | 0.44                                                   | 37.17           |
| DJ694;2.1                            | Bg2;1077,1080 | 07-07-12 | 1.73                                                   | 111.04          |
| DJ694;2.1                            | Bg2;1077,1080 | 07-07-12 | 1.92                                                   | 123.59          |
| DJ694;2.1                            | Bg2;1077,1080 | 07-07-12 | 1.91                                                   | 123.04          |
| DJ694;2.1                            | Bg2;1077,1080 | 07-07-30 | 0.96                                                   | 64.05           |
| DJ694;2.1                            | Bg2;1077,1080 | 07-07-30 | 0.91                                                   | 60.44           |
| DJ694;2.1                            | Bg2;1077,1080 | 07-07-30 | 1.16                                                   | 76.93           |
| <b>DJ694 + 2.1 + DJ1080 + DJ1083</b> |               |          |                                                        |                 |
| DJ694;2.1                            | Bg2;1080,1083 | 07-08-03 | 0.68                                                   | 22.41           |
| DJ694;2.1                            | Bg2;1080,1083 | 07-08-03 | 0.73                                                   | 24.13           |
| DJ694;2.1                            | Bg2;1080,1083 | 07-08-03 | 0.92                                                   | 30.38           |
| DJ694;2.1                            | Bg2;1080,1083 | 07-08-15 | 0.55                                                   | 47.33           |
| DJ694;2.1                            | Bg2;1080,1083 | 07-08-15 | 0.39                                                   | 33.09           |
| DJ694;2.1                            | Bg2;1080,1083 | 07-08-15 | 0.51                                                   | 43.91           |
| DJ694;2.1                            | Bg2;1080,1083 | 07-07-12 | 0.75                                                   | 47.92           |
| DJ694;2.1                            | Bg2;1080,1083 | 07-07-12 | 0.92                                                   | 59.12           |
| DJ694;2.1                            | Bg2;1080,1083 | 07-07-12 | 0.94                                                   | 60.47           |
| DJ694;2.1                            | Bg2;1080,1083 | 07-07-30 | 0.79                                                   | 52.40           |
| DJ694;2.1                            | Bg2;1080,1083 | 07-07-30 | 0.86                                                   | 57.12           |
| DJ694;2.1                            | Bg2;1080,1083 | 07-07-30 | 0.67                                                   | 44.72           |
| <b>DJ694 + 3.3 + DJ1077 + DJ1080</b> |               |          |                                                        |                 |
| DJ694;3.3                            | Bg2;1077,1080 | 07-08-03 | 0.69                                                   | 22.89           |
| DJ694;3.3                            | Bg2;1077,1080 | 07-08-03 | 0.94                                                   | 30.98           |
| DJ694;3.3                            | Bg2;1077,1080 | 07-08-03 | 1.10                                                   | 36.47           |
| DJ694;3.3                            | Bg2;1077,1080 | 07-08-15 | 0.60                                                   | 51.48           |
| DJ694;3.3                            | Bg2;1077,1080 | 07-08-15 | 0.53                                                   | 45.46           |
| DJ694;3.3                            | Bg2;1077,1080 | 07-08-15 | 0.41                                                   | 35.01           |
| DJ694;3.3                            | Bg2;1077,1080 | 07-07-12 | 0.51                                                   | 32.54           |
| DJ694;3.3                            | Bg2;1077,1080 | 07-07-12 | 0.46                                                   | 29.42           |
| DJ694;3.3                            | Bg2;1077,1080 | 07-07-12 | 0.36                                                   | 23.28           |
| DJ694;3.3                            | Bg2;1077,1080 | 07-07-30 | 0.45                                                   | 29.59           |
| DJ694;3.3                            | Bg2;1077,1080 | 07-07-30 | 0.40                                                   | 26.40           |
| DJ694;3.3                            | Bg2;1077,1080 | 07-07-30 | 1.04                                                   | 69.30           |
| <b>DJ694 + 3.3 + DJ1080 + DJ1083</b> |               |          |                                                        |                 |
| DJ694;3.3                            | Bg2;1080,1083 | 07-08-03 | 1.16                                                   | 38.48           |

L3 larvae

| Parents                           |               | Date     | Specific activity<br>$\Delta$ mOD/min/ $\mu$ g protein | % DJ694 control |
|-----------------------------------|---------------|----------|--------------------------------------------------------|-----------------|
| Male                              | Female        |          |                                                        |                 |
| DJ694;3.3                         | Bg2;1080,1083 | 07-08-03 | 1.09                                                   | 36.15           |
| DJ694;3.3                         | Bg2;1080,1083 | 07-08-03 | 0.58                                                   | 19.28           |
| DJ694;3.3                         | Bg2;1080,1083 | 07-08-15 | 0.42                                                   | 35.89           |
| DJ694;3.3                         | Bg2;1080,1083 | 07-08-15 | 0.59                                                   | 50.16           |
| DJ694;3.3                         | Bg2;1080,1083 | 07-08-15 | 0.55                                                   | 46.77           |
| DJ694;3.3                         | Bg2;1080,1083 | 07-07-12 | 0.17                                                   | 11.17           |
| DJ694;3.3                         | Bg2;1080,1083 | 07-07-12 | 0.51                                                   | 33.07           |
| DJ694;3.3                         | Bg2;1080,1083 | 07-07-12 | 0.49                                                   | 31.30           |
| DJ694;3.3                         | Bg2;1080,1083 | 07-07-30 | 0.65                                                   | 43.15           |
| DJ694;3.3                         | Bg2;1080,1083 | 07-07-30 | 0.71                                                   | 47.37           |
| DJ694;3.3                         | Bg2;1080,1083 | 07-07-30 | 0.76                                                   | 50.14           |
| <b>DJ694 + 2.1 + 3.3 + DJ1077</b> |               |          |                                                        |                 |
| DJ694;1077                        | Bg2;2.1,3.3   | 07-08-03 | 0.58                                                   | 19.19           |
| DJ694;1077                        | Bg2;2.1,3.3   | 07-08-03 | 0.43                                                   | 14.17           |
| DJ694;1077                        | Bg2;2.1,3.3   | 07-08-03 | 0.69                                                   | 22.78           |
| DJ694;1077                        | Bg2;2.1,3.3   | 07-08-15 | 0.30                                                   | 25.55           |
| DJ694;1077                        | Bg2;2.1,3.3   | 07-08-15 | 0.47                                                   | 39.78           |
| DJ694;1077                        | Bg2;2.1,3.3   | 07-08-15 | 0.32                                                   | 27.10           |
| DJ694;1077                        | Bg2;2.1,3.3   | 07-07-04 | 0.88                                                   | 24.08           |
| DJ694;1077                        | Bg2;2.1,3.3   | 07-07-04 | 1.32                                                   | 35.92           |
| DJ694;1077                        | Bg2;2.1,3.3   | 07-07-04 | 0.79                                                   | 21.58           |
| DJ694;1077                        | Bg2;2.1,3.3   | 07-07-12 | 0.33                                                   | 21.25           |
| DJ694;1077                        | Bg2;2.1,3.3   | 07-07-12 | 0.31                                                   | 19.83           |
| DJ694;1077                        | Bg2;2.1,3.3   | 07-07-12 | 0.29                                                   | 18.70           |
| DJ694;1077                        | Bg2;2.1,3.3   | 07-07-30 | 0.75                                                   | 50.01           |
| DJ694;1077                        | Bg2;2.1,3.3   | 07-07-30 | 0.75                                                   | 50.05           |
| DJ694;1077                        | Bg2;2.1,3.3   | 07-07-30 | 0.76                                                   | 50.16           |
| <b>DJ694 + 2.1 + 3.3 + DJ1080</b> |               |          |                                                        |                 |
| DJ694;1080                        | Bg2;2.1,3.3   | 07-08-03 | 1.14                                                   | 37.68           |
| DJ694;1080                        | Bg2;2.1,3.3   | 07-08-03 | 0.78                                                   | 25.86           |
| DJ694;1080                        | Bg2;2.1,3.3   | 07-08-03 | 0.67                                                   | 22.23           |
| DJ694;1080                        | Bg2;2.1,3.3   | 07-08-15 | 0.76                                                   | 65.10           |
| DJ694;1080                        | Bg2;2.1,3.3   | 07-08-15 | 0.65                                                   | 55.63           |
| DJ694;1080                        | Bg2;2.1,3.3   | 07-08-15 | 0.55                                                   | 46.54           |
| DJ694;1080                        | Bg2;2.1,3.3   | 07-07-04 | 2.06                                                   | 56.14           |
| DJ694;1080                        | Bg2;2.1,3.3   | 07-07-04 | 1.49                                                   | 40.62           |
| DJ694;1080                        | Bg2;2.1,3.3   | 07-07-04 | 1.62                                                   | 44.04           |
| DJ694;1080                        | Bg2;2.1,3.3   | 07-07-12 | 0.73                                                   | 46.94           |
| DJ694;1080                        | Bg2;2.1,3.3   | 07-07-12 | 0.62                                                   | 39.81           |
| DJ694;1080                        | Bg2;2.1,3.3   | 07-07-12 | 0.58                                                   | 37.20           |

| Parents                                       |                  | Date     | Specific activity                 | % DJ694 control |
|-----------------------------------------------|------------------|----------|-----------------------------------|-----------------|
| Male                                          | Female           |          | $\Delta$ mOD/min/ $\mu$ g protein |                 |
| DJ694;1080                                    | Bg2;2.1,3.3      | 07-07-30 | 1.81                              | 120.29          |
| DJ694;1080                                    | Bg2;2.1,3.3      | 07-07-30 | 0.95                              | 62.97           |
| DJ694;1080                                    | Bg2;2.1,3.3      | 07-07-30 | 0.61                              | 40.39           |
| <b>DJ694 + 2 copies 2.1 + 2 copies DJ1077</b> |                  |          |                                   |                 |
| DJ694;2.1,1077                                | Bg2;2.1,1077     | 07-11-13 | 0.28                              | <b>9.85</b>     |
| DJ694;2.1,1077                                | Bg2;2.1,1077     | 07-11-13 | 0.29                              | <b>10.29</b>    |
| DJ694;2.1,1077                                | Bg2;2.1,1077     | 07-11-13 | 0.41                              | <b>14.26</b>    |
| DJ694;2.1,1077                                | Bg2;2.1,1077     | 07-11-30 | 0.45                              | <b>18.97</b>    |
| DJ694;2.1,1077                                | Bg2;2.1,1077     | 07-11-30 | 0.44                              | <b>18.45</b>    |
| DJ694;2.1,1077                                | Bg2;2.1,1077     | 07-11-30 | 0.65                              | <b>27.23</b>    |
| DJ694;2.1,1077                                | Bg2;2.1,1077     | 07-12-19 | 1.39                              | <b>35.29</b>    |
| DJ694;2.1,1077                                | Bg2;2.1,1077     | 07-12-19 | 1.30                              | <b>33.06</b>    |
| DJ694;2.1,1077                                | Bg2;2.1,1077     | 07-12-19 | 1.04                              | <b>26.41</b>    |
| DJ694;2.1,1077                                | Bg2;2.1,1077     | 07-12-19 | 1.72                              | <b>43.84</b>    |
| DJ694;2.1,1077                                | Bg2;2.1,1077     | 07-12-19 | 1.09                              | <b>27.76</b>    |
| DJ694;2.1,1077                                | Bg2;2.1,1077     | 07-12-19 | 1.64                              | <b>41.73</b>    |
| DJ694;2.1,1077                                | Bg2;2.1,1077     | 08-02-10 | 0.66                              | <b>12.72</b>    |
| DJ694;2.1,1077                                | Bg2;2.1,1077     | 08-02-10 | 0.89                              | <b>16.98</b>    |
| DJ694;2.1,1077                                | Bg2;2.1,1077     | 08-02-10 | 1.07                              | <b>20.45</b>    |
| DJ694;2.1,1077                                | Bg2;2.1,1077     | 08-02-22 | 1.26                              | <b>14.61</b>    |
| DJ694;2.1,1077                                | Bg2;2.1,1077     | 08-02-22 | 1.63                              | <b>18.87</b>    |
| DJ694;2.1,1077                                | Bg2;2.1,1077     | 08-02-22 | 2.00                              | <b>23.15</b>    |
| <b>DJ694 + 2 copies 2.1 + DJ1077 + DJ1079</b> |                  |          |                                   |                 |
| DJ694;2.1,1077                                | Bg2;2.1,1079(13) | 07-11-13 | 0.39                              | <b>13.72</b>    |
| DJ694;2.1,1077                                | Bg2;2.1,1079(13) | 07-11-13 | 0.60                              | <b>21.10</b>    |
| DJ694;2.1,1077                                | Bg2;2.1,1079(13) | 07-11-13 | 0.56                              | <b>19.58</b>    |
| DJ694;2.1,1077                                | Bg2;2.1,1079(13) | 07-11-30 | 0.53                              | <b>22.41</b>    |
| DJ694;2.1,1077                                | Bg2;2.1,1079(13) | 07-11-30 | 0.43                              | <b>17.87</b>    |
| DJ694;2.1,1077                                | Bg2;2.1,1079(13) | 07-11-30 | 0.45                              | <b>18.68</b>    |
| DJ694;2.1,1077                                | Bg2;2.1,1079(13) | 07-12-19 | 1.05                              | <b>26.61</b>    |
| DJ694;2.1,1077                                | Bg2;2.1,1079(13) | 07-12-19 | 1.02                              | <b>26.00</b>    |
| DJ694;2.1,1077                                | Bg2;2.1,1079(13) | 07-12-19 | 0.96                              | <b>24.30</b>    |
| DJ694;2.1,1077                                | Bg2;2.1,1079(14) | 07-12-19 | 1.65                              | <b>41.86</b>    |
| DJ694;2.1,1077                                | Bg2;2.1,1079(14) | 07-12-19 | 1.87                              | <b>47.66</b>    |
| DJ694;2.1,1077                                | Bg2;2.1,1079(14) | 07-12-19 | 2.12                              | <b>53.86</b>    |
| DJ694;2.1,1077                                | Bg2;2.1,1079(14) | 07-11-13 | 0.39                              | <b>13.82</b>    |
| DJ694;2.1,1077                                | Bg2;2.1,1079(14) | 07-11-13 | 0.29                              | <b>10.32</b>    |
| DJ694;2.1,1077                                | Bg2;2.1,1079(14) | 07-11-13 | 0.33                              | <b>11.62</b>    |
| DJ694;2.1,1077                                | Bg2;2.1,1079(14) | 07-11-30 | 0.67                              | <b>28.26</b>    |
| DJ694;2.1,1077                                | Bg2;2.1,1079(14) | 07-11-30 | 0.63                              | <b>26.22</b>    |



L3 larvae

| <b>Parents</b>                             |                  | <b>Date</b> | <b>Specific activity<br/><math>\Delta</math>mOD/min/<math>\mu</math>g protein</b> | <b>% DJ694 control</b> |
|--------------------------------------------|------------------|-------------|-----------------------------------------------------------------------------------|------------------------|
| <b>Male</b>                                | <b>Female</b>    |             |                                                                                   |                        |
| DJ694;2.1,1077                             | Bg2;2.1,1079(14) | 07-11-30    | 0.45                                                                              | <b>18.84</b>           |
| DJ694;2.1,1077                             | Bg2;2.1,1079(14) | 07-12-19    | 1.25                                                                              | <b>31.72</b>           |
| DJ694;2.1,1077                             | Bg2;2.1,1079(14) | 07-12-19    | 1.35                                                                              | <b>34.23</b>           |
| DJ694;2.1,1077                             | Bg2;2.1,1079(14) | 07-12-19    | 1.55                                                                              | <b>39.49</b>           |
| DJ694;2.1,1079(13)                         | Bg2;2.1,1077     | 07-12-19    | 0.54                                                                              | <b>13.61</b>           |
| DJ694;2.1,1079(13)                         | Bg2;2.1,1077     | 07-12-19    | 1.49                                                                              | <b>37.77</b>           |
| DJ694;2.1,1079(13)                         | Bg2;2.1,1077     | 07-12-19    | 1.01                                                                              | <b>25.70</b>           |
| DJ694;2.1,1079(14)                         | Bg2;2.1,1077     | 07-12-19    | 1.46                                                                              | <b>37.18</b>           |
| DJ694;2.1,1079(14)                         | Bg2;2.1,1077     | 07-12-19    | 1.17                                                                              | <b>29.76</b>           |
| DJ694;2.1,1079(14)                         | Bg2;2.1,1077     | 07-12-19    | 1.01                                                                              | <b>25.55</b>           |
| DJ694;2.1,1079(14)                         | Bg2;2.1,1077     | 07-12-19    | 0.63                                                                              | <b>15.92</b>           |
| DJ694;2.1,1079(14)                         | Bg2;2.1,1077     | 07-12-19    | 1.03                                                                              | <b>26.06</b>           |
| DJ694;2.1,1079(14)                         | Bg2;2.1,1077     | 07-12-19    | 1.25                                                                              | <b>31.73</b>           |
| DJ694;2.1,1077                             | Bg2;2.1,1079(13) | 08-02-10    | 0.75                                                                              | <b>14.26</b>           |
| DJ694;2.1,1077                             | Bg2;2.1,1079(13) | 08-02-10    | 0.54                                                                              | <b>10.38</b>           |
| DJ694;2.1,1077                             | Bg2;2.1,1079(13) | 08-02-10    | 0.70                                                                              | <b>13.49</b>           |
| DJ694;2.1,1077                             | Bg2;2.1,1079(13) | 08-02-22    | 1.65                                                                              | <b>19.07</b>           |
| DJ694;2.1,1077                             | Bg2;2.1,1079(13) | 08-02-22    | 1.42                                                                              | <b>16.44</b>           |
| DJ694;2.1,1077                             | Bg2;2.1,1079(13) | 08-02-22    | 1.38                                                                              | <b>16.00</b>           |
| DJ694;2.1,1077                             | Bg2;2.1,1079(14) | 08-02-10    | 0.48                                                                              | <b>9.10</b>            |
| DJ694;2.1,1077                             | Bg2;2.1,1079(14) | 08-02-10    | 0.78                                                                              | <b>14.97</b>           |
| DJ694;2.1,1077                             | Bg2;2.1,1079(14) | 08-02-10    | 0.61                                                                              | <b>11.58</b>           |
| DJ694;2.1,1079(13)                         | Bg2;2.1,1077     | 08-02-10    | 0.46                                                                              | <b>8.86</b>            |
| DJ694;2.1,1079(13)                         | Bg2;2.1,1077     | 08-02-10    | 0.56                                                                              | <b>10.67</b>           |
| DJ694;2.1,1079(13)                         | Bg2;2.1,1077     | 08-02-10    | 0.66                                                                              | <b>12.67</b>           |
| DJ694;2.1,1079(13)                         | Bg2;2.1,1077     | 08-02-22    | 3.60                                                                              | <b>41.65</b>           |
| DJ694;2.1,1079(13)                         | Bg2;2.1,1077     | 08-02-22    | 2.29                                                                              | <b>26.47</b>           |
| DJ694;2.1,1079(13)                         | Bg2;2.1,1077     | 08-02-22    | 4.44                                                                              | <b>51.31</b>           |
| DJ694;2.1,1079(14)                         | Bg2;2.1,1077     | 08-02-10    | 0.86                                                                              | <b>16.42</b>           |
| DJ694;2.1,1079(14)                         | Bg2;2.1,1077     | 08-02-10    | 0.90                                                                              | <b>17.23</b>           |
| DJ694;2.1,1079(14)                         | Bg2;2.1,1077     | 08-02-10    | 0.83                                                                              | <b>15.92</b>           |
| <b>DJ694 + 2.1 + 3.3 + 2 copies DJ1077</b> |                  |             |                                                                                   |                        |
| DJ694;2.1,1077                             | Bg2;3.3,1077     | 07-12-19    | 1.24                                                                              | <b>31.58</b>           |
| DJ694;2.1,1077                             | Bg2;3.3,1077     | 07-12-19    | 1.19                                                                              | <b>30.35</b>           |
| DJ694;2.1,1077                             | Bg2;3.3,1077     | 07-12-19    | 0.49                                                                              | <b>12.38</b>           |
| DJ694;2.1,1077                             | Bg2;3.3,1077     | 07-11-13    | 0.41                                                                              | <b>14.46</b>           |
| DJ694;2.1,1077                             | Bg2;3.3,1077     | 07-11-13    | 0.38                                                                              | <b>13.42</b>           |
| DJ694;2.1,1077                             | Bg2;3.3,1077     | 07-11-13    | 0.41                                                                              | <b>14.30</b>           |
| DJ694;2.1,1077                             | Bg2;3.3,1077     | 07-11-30    | 0.48                                                                              | <b>20.23</b>           |
| DJ694;2.1,1077                             | Bg2;3.3,1077     | 07-11-30    | 0.28                                                                              | <b>11.61</b>           |

L3 larvae

| <b>Parents</b>                             |               | <b>Date</b> | <b>Specific activity<br/><math>\Delta</math>mOD/min/<math>\mu</math>g protein</b> | <b>% DJ694 control</b> |
|--------------------------------------------|---------------|-------------|-----------------------------------------------------------------------------------|------------------------|
| <b>Male</b>                                | <b>Female</b> |             |                                                                                   |                        |
| DJ694;2.1,1077                             | Bg2;3.3,1077  | 07-11-30    | 0.44                                                                              | 18.56                  |
| DJ694;2.1,1077                             | Bg2;3.3,1077  | 07-12-19    | 1.20                                                                              | 30.52                  |
| DJ694;2.1,1077                             | Bg2;3.3,1077  | 07-12-19    | 0.93                                                                              | 23.62                  |
| DJ694;2.1,1077                             | Bg2;3.3,1077  | 07-12-19    | 1.33                                                                              | 33.89                  |
| DJ694;3.3,1077                             | Bg2;2.1,1077  | 07-11-13    | 0.51                                                                              | 17.95                  |
| DJ694;3.3,1077                             | Bg2;2.1,1077  | 07-11-13    | 0.47                                                                              | 16.34                  |
| DJ694;3.3,1077                             | Bg2;2.1,1077  | 07-11-13    | 0.62                                                                              | 21.88                  |
| DJ694;3.3,1077                             | Bg2;2.1,1077  | 07-11-30    | 0.37                                                                              | 15.67                  |
| DJ694;3.3,1077                             | Bg2;2.1,1077  | 07-11-30    | 0.57                                                                              | 23.85                  |
| DJ694;3.3,1077                             | Bg2;2.1,1077  | 07-11-30    | 0.47                                                                              | 19.62                  |
| DJ694;3.3,1077                             | Bg2;2.1,1077  | 07-12-19    | 0.99                                                                              | 25.17                  |
| DJ694;3.3,1077                             | Bg2;2.1,1077  | 07-12-19    | 1.01                                                                              | 25.66                  |
| DJ694;3.3,1077                             | Bg2;2.1,1077  | 07-12-19    | 1.44                                                                              | 36.52                  |
| DJ694;3.3,1077                             | Bg2;2.1,1077  | 07-12-19    | 0.83                                                                              | 21.00                  |
| DJ694;3.3,1077                             | Bg2;2.1,1077  | 07-12-19    | 1.45                                                                              | 36.96                  |
| DJ694;3.3,1077                             | Bg2;2.1,1077  | 07-12-19    | 0.94                                                                              | 23.99                  |
| DJ694;2.1,1077                             | Bg2;3.3,1077  | 08-02-10    | 0.71                                                                              | 13.65                  |
| DJ694;2.1,1077                             | Bg2;3.3,1077  | 08-02-10    | 0.71                                                                              | 13.56                  |
| DJ694;2.1,1077                             | Bg2;3.3,1077  | 08-02-10    | 0.64                                                                              | 12.22                  |
| DJ694;2.1,1077                             | Bg2;3.3,1077  | 08-02-22    | 1.90                                                                              | 21.98                  |
| DJ694;2.1,1077                             | Bg2;3.3,1077  | 08-02-22    | 1.96                                                                              | 22.66                  |
| DJ694;2.1,1077                             | Bg2;3.3,1077  | 08-02-22    | 1.42                                                                              | 16.36                  |
| DJ694;3.3,1077                             | Bg2;2.1,1077  | 08-02-10    | 0.76                                                                              | 14.60                  |
| DJ694;3.3,1077                             | Bg2;2.1,1077  | 08-02-10    | 1.09                                                                              | 20.88                  |
| DJ694;3.3,1077                             | Bg2;2.1,1077  | 08-02-10    | 1.01                                                                              | 19.28                  |
| DJ694;3.3,1077                             | Bg2;2.1,1077  | 08-02-22    | 0.96                                                                              | 11.06                  |
| DJ694;3.3,1077                             | Bg2;2.1,1077  | 08-02-22    | 1.05                                                                              | 12.14                  |
| DJ694;3.3,1077                             | Bg2;2.1,1077  | 08-02-22    | 0.91                                                                              | 10.51                  |
| <b>DJ694 + 2.1 + 3.3 + DJ1077 + DJ1079</b> |               |             |                                                                                   |                        |
| DJ694;2.1,1077                             | Bg2;3.3,1079  | 07-11-13    | 0.37                                                                              | 13.03                  |
| DJ694;2.1,1077                             | Bg2;3.3,1079  | 07-11-13    | 0.39                                                                              | 13.65                  |
| DJ694;2.1,1077                             | Bg2;3.3,1079  | 07-11-13    | 0.65                                                                              | 22.74                  |
| DJ694;2.1,1077                             | Bg2;3.3,1079  | 07-11-30    | 0.44                                                                              | 18.47                  |
| DJ694;2.1,1077                             | Bg2;3.3,1079  | 07-11-30    | 0.41                                                                              | 17.10                  |
| DJ694;2.1,1077                             | Bg2;3.3,1079  | 07-11-30    | 0.62                                                                              | 26.06                  |
| DJ694;2.1,1077                             | Bg2;3.3,1079  | 07-12-19    | 1.20                                                                              | 30.61                  |
| DJ694;2.1,1077                             | Bg2;3.3,1079  | 07-12-19    | 1.55                                                                              | 39.47                  |
| DJ694;2.1,1077                             | Bg2;3.3,1079  | 07-12-19    | 1.25                                                                              | 31.76                  |
| DJ694;2.1,1077                             | Bg2;3.3,1079  | 07-12-19    | 1.10                                                                              | 28.03                  |
| DJ694;2.1,1077                             | Bg2;3.3,1079  | 07-12-19    | 1.72                                                                              | 43.70                  |

| <b>Parents</b>     |                  | <b>Date</b> | <b>Specific activity<br/><math>\Delta</math>mOD/min/<math>\mu</math>g protein</b> | <b>% DJ694 control</b> |
|--------------------|------------------|-------------|-----------------------------------------------------------------------------------|------------------------|
| <b>Male</b>        | <b>Female</b>    |             |                                                                                   |                        |
| DJ694;2.1,1077     | Bg2;3.3,1079     | 07-12-19    | 1.85                                                                              | 47.16                  |
| DJ694;2.1,1079(13) | Bg2;3.3,1077     | 07-12-19    | 0.81                                                                              | 20.60                  |
| DJ694;2.1,1079(13) | Bg2;3.3,1077     | 07-12-19    | 0.72                                                                              | 18.29                  |
| DJ694;2.1,1079(13) | Bg2;3.3,1077     | 07-12-19    | 0.88                                                                              | 22.44                  |
| DJ694;2.1,1079(14) | Bg2;3.3,1077     | 07-12-19    | 0.88                                                                              | 22.47                  |
| DJ694;2.1,1079(14) | Bg2;3.3,1077     | 07-12-19    | 0.91                                                                              | 23.21                  |
| DJ694;2.1,1079(14) | Bg2;3.3,1077     | 07-12-19    | 0.73                                                                              | 18.44                  |
| DJ694;2.1,1079(14) | Bg2;3.3,1077     | 07-12-19    | 0.99                                                                              | 25.28                  |
| DJ694;2.1,1079(14) | Bg2;3.3,1077     | 07-12-19    | 0.99                                                                              | 25.23                  |
| DJ694;2.1,1079(14) | Bg2;3.3,1077     | 07-12-19    | 1.02                                                                              | 25.88                  |
| DJ694;3.3,1077     | Bg2;2.1,1079(13) | 07-11-13    | 0.36                                                                              | 12.60                  |
| DJ694;3.3,1077     | Bg2;2.1,1079(13) | 07-11-13    | 0.19                                                                              | 6.84                   |
| DJ694;3.3,1077     | Bg2;2.1,1079(13) | 07-11-13    | 0.59                                                                              | 20.69                  |
| DJ694;3.3,1077     | Bg2;2.1,1079(13) | 07-11-30    | 0.38                                                                              | 15.91                  |
| DJ694;3.3,1077     | Bg2;2.1,1079(13) | 07-11-30    | 0.42                                                                              | 17.77                  |
| DJ694;3.3,1077     | Bg2;2.1,1079(13) | 07-11-30    | 0.46                                                                              | 19.37                  |
| DJ694;3.3,1077     | Bg2;2.1,1079(13) | 07-12-19    | 0.87                                                                              | 22.05                  |
| DJ694;3.3,1077     | Bg2;2.1,1079(13) | 07-12-19    | 0.79                                                                              | 19.96                  |
| DJ694;3.3,1077     | Bg2;2.1,1079(13) | 07-12-19    | 0.91                                                                              | 23.20                  |
| DJ694;3.3,1077     | Bg2;2.1,1079(14) | 07-11-13    | 0.48                                                                              | 16.78                  |
| DJ694;3.3,1077     | Bg2;2.1,1079(14) | 07-11-13    | 0.35                                                                              | 12.27                  |
| DJ694;3.3,1077     | Bg2;2.1,1079(14) | 07-11-13    | 0.25                                                                              | 8.81                   |
| DJ694;3.3,1077     | Bg2;2.1,1079(14) | 07-11-30    | 0.38                                                                              | 15.87                  |
| DJ694;3.3,1077     | Bg2;2.1,1079(14) | 07-11-30    | 0.41                                                                              | 17.08                  |
| DJ694;3.3,1077     | Bg2;2.1,1079(14) | 07-11-30    | 0.39                                                                              | 16.42                  |
| DJ694;3.3,1077     | Bg2;2.1,1079(14) | 07-12-19    | 1.36                                                                              | 34.63                  |
| DJ694;3.3,1077     | Bg2;2.1,1079(14) | 07-12-19    | 0.72                                                                              | 18.40                  |
| DJ694;3.3,1077     | Bg2;2.1,1079(14) | 07-12-19    | 0.74                                                                              | 18.73                  |
| DJ694;3.3,1077     | Bg2;2.1,1079(14) | 07-12-19    | 1.10                                                                              | 27.87                  |
| DJ694;3.3,1077     | Bg2;2.1,1079(14) | 07-12-19    | 1.11                                                                              | 28.20                  |
| DJ694;3.3,1077     | Bg2;2.1,1079(14) | 07-12-19    | 1.11                                                                              | 28.30                  |
| DJ694;1077,1079    | Bg2;2.1,3.3      | 07-06-15    | 1.44                                                                              | 10.50                  |
| DJ694;1077,1079    | Bg2;2.1,3.3      | 07-06-15    | 1.45                                                                              | 10.52                  |
| DJ694;1077,1079    | Bg2;2.1,3.3      | 07-06-15    | 1.34                                                                              | 9.78                   |
| DJ694;1077,1079    | Bg2;2.1,3.3      | 07-07-04    | 0.89                                                                              | 24.20                  |
| DJ694;1077,1079    | Bg2;2.1,3.3      | 07-07-04    | 0.88                                                                              | 23.87                  |
| DJ694;1077,1079    | Bg2;2.1,3.3      | 07-07-04    | 0.80                                                                              | 21.82                  |
| DJ694;2.1,1077     | Bg2;3.3,1079     | 08-02-10    | 0.96                                                                              | 18.43                  |
| DJ694;2.1,1077     | Bg2;3.3,1079     | 08-02-10    | 1.25                                                                              | 23.99                  |
| DJ694;2.1,1077     | Bg2;3.3,1079     | 08-02-10    | 1.00                                                                              | 19.11                  |

L3 larvae

| Parents            |                  | Date     | Specific activity<br>$\Delta$ mOD/min/ $\mu$ g protein | % DJ694 control |
|--------------------|------------------|----------|--------------------------------------------------------|-----------------|
| Male               | Female           |          |                                                        |                 |
| DJ694;2.1,1079(13) | Bg2;3.3,1077     | 08-02-10 | 0.73                                                   | 13.92           |
| DJ694;2.1,1079(13) | Bg2;3.3,1077     | 08-02-10 | 0.82                                                   | 15.63           |
| DJ694;2.1,1079(13) | Bg2;3.3,1077     | 08-02-10 | 0.57                                                   | 10.83           |
| DJ694;2.1,1079(13) | Bg2;3.3,1077     | 08-02-22 | 2.17                                                   | 25.08           |
| DJ694;2.1,1079(13) | Bg2;3.3,1077     | 08-02-22 | 2.87                                                   | 33.18           |
| DJ694;2.1,1079(14) | Bg2;3.3,1077     | 08-02-10 | 1.32                                                   | 25.20           |
| DJ694;2.1,1079(14) | Bg2;3.3,1077     | 08-02-10 | 1.39                                                   | 26.54           |
| DJ694;2.1,1079(14) | Bg2;3.3,1077     | 08-02-10 | 1.62                                                   | 31.05           |
| DJ694;3.3,1077     | Bg2;2.1,1079(13) | 08-02-10 | 1.11                                                   | 21.19           |
| DJ694;3.3,1077     | Bg2;2.1,1079(13) | 08-02-10 | 0.97                                                   | 18.56           |
| DJ694;3.3,1077     | Bg2;2.1,1079(13) | 08-02-10 | 0.82                                                   | 15.70           |
| DJ694;3.3,1077     | Bg2;2.1,1079(13) | 08-02-22 | 1.98                                                   | 22.84           |
| DJ694;3.3,1077     | Bg2;2.1,1079(13) | 08-02-22 | 2.55                                                   | 29.47           |
| DJ694;3.3,1077     | Bg2;2.1,1079(13) | 08-02-22 | 2.95                                                   | 34.10           |
| DJ694;3.3,1077     | Bg2;2.1,1079(14) | 08-02-10 | 0.74                                                   | 14.13           |
| DJ694;3.3,1077     | Bg2;2.1,1079(14) | 08-02-10 | 0.69                                                   | 13.24           |
| DJ694;3.3,1077     | Bg2;2.1,1079(14) | 08-02-10 | 1.12                                                   | 21.36           |
| DJ694;2.1,1079(13) | Bg2;3.3,1077     | 08-02-22 | 7.98                                                   | 92.26           |

**DJ694 + 2 copies 2.1 + 2 copies DJ1079**

|                    |                  |          |      |       |
|--------------------|------------------|----------|------|-------|
| DJ694;2.1,1079(13) | Bg2;2.1,1079(13) | 07-12-19 | 1.13 | 28.63 |
| DJ694;2.1,1079(13) | Bg2;2.1,1079(13) | 07-12-19 | 0.81 | 20.53 |
| DJ694;2.1,1079(13) | Bg2;2.1,1079(13) | 07-12-19 | 0.89 | 22.55 |
| DJ694;2.1,1079(13) | Bg2;2.1,1079(14) | 07-12-19 | 0.72 | 18.33 |
| DJ694;2.1,1079(13) | Bg2;2.1,1079(14) | 07-12-19 | 0.88 | 22.38 |
| DJ694;2.1,1079(13) | Bg2;2.1,1079(14) | 07-12-19 | 0.79 | 20.16 |
| DJ694;2.1,1079(14) | Bg2;2.1,1079(13) | 07-12-19 | 1.23 | 31.17 |
| DJ694;2.1,1079(14) | Bg2;2.1,1079(13) | 07-12-19 | 1.39 | 35.34 |
| DJ694;2.1,1079(14) | Bg2;2.1,1079(13) | 07-12-19 | 1.09 | 27.64 |
| DJ694;2.1,1079(14) | Bg2;2.1,1079(14) | 07-12-19 | 1.37 | 34.84 |
| DJ694;2.1,1079(14) | Bg2;2.1,1079(14) | 07-12-19 | 0.98 | 24.86 |
| DJ694;2.1,1079(14) | Bg2;2.1,1079(14) | 07-12-19 | 1.61 | 40.87 |
| DJ694;2.1,1079(14) | Bg2;2.1,1079(14) | 07-12-19 | 1.03 | 26.12 |
| DJ694;2.1,1079(14) | Bg2;2.1,1079(14) | 07-12-19 | 1.62 | 41.28 |
| DJ694;2.1,1079(14) | Bg2;2.1,1079(14) | 07-12-19 | 1.60 | 40.60 |
| DJ694;2.1,1079(13) | Bg2;2.1,1079(13) | 08-02-10 | 0.73 | 13.93 |
| DJ694;2.1,1079(13) | Bg2;2.1,1079(13) | 08-02-10 | 0.96 | 18.36 |
| DJ694;2.1,1079(13) | Bg2;2.1,1079(13) | 08-02-10 | 0.79 | 15.18 |
| DJ694;2.1,1079(13) | Bg2;2.1,1079(14) | 08-02-10 | 0.62 | 11.93 |
| DJ694;2.1,1079(13) | Bg2;2.1,1079(14) | 08-02-10 | 0.77 | 14.77 |
| DJ694;2.1,1079(13) | Bg2;2.1,1079(14) | 08-02-10 | 0.83 | 15.91 |

L3 larvae

| <b>Parents</b>                                |                  | <b>Date</b> | <b>Specific activity<br/><math>\Delta</math>mOD/min/<math>\mu</math>g protein</b> | <b>% DJ694 control</b> |
|-----------------------------------------------|------------------|-------------|-----------------------------------------------------------------------------------|------------------------|
| <b>Male</b>                                   | <b>Female</b>    |             |                                                                                   |                        |
| DJ694;2.1,1079(14)                            | Bg2;2.1,1079(13) | 08-02-10    | 0.69                                                                              | <b>13.14</b>           |
| DJ694;2.1,1079(14)                            | Bg2;2.1,1079(13) | 08-02-10    | 0.62                                                                              | <b>11.81</b>           |
| DJ694;2.1,1079(14)                            | Bg2;2.1,1079(13) | 08-02-10    | 0.63                                                                              | <b>12.00</b>           |
| DJ694;2.1,1079(14)                            | Bg2;2.1,1079(14) | 08-02-10    | 0.87                                                                              | <b>16.58</b>           |
| DJ694;2.1,1079(14)                            | Bg2;2.1,1079(14) | 08-02-10    | 0.91                                                                              | <b>17.37</b>           |
| DJ694;2.1,1079(14)                            | Bg2;2.1,1079(14) | 08-02-10    | 1.09                                                                              | <b>20.90</b>           |
| <b>DJ694 + 2.1 + 3.3 + 2 copies DJ1079</b>    |                  |             |                                                                                   |                        |
| DJ694;2.1,1079(13)                            | Bg2;3.3,1079     | 07-12-19    | 1.11                                                                              | <b>28.32</b>           |
| DJ694;2.1,1079(13)                            | Bg2;3.3,1079     | 07-12-19    | 1.30                                                                              | <b>33.03</b>           |
| DJ694;2.1,1079(13)                            | Bg2;3.3,1079     | 07-12-19    | 1.10                                                                              | <b>28.04</b>           |
| DJ694;2.1,1079(14)                            | Bg2;3.3,1079     | 07-12-19    | 0.91                                                                              | <b>23.16</b>           |
| DJ694;2.1,1079(14)                            | Bg2;3.3,1079     | 07-12-19    | 0.91                                                                              | <b>23.19</b>           |
| DJ694;2.1,1079(14)                            | Bg2;3.3,1079     | 07-12-19    | 1.29                                                                              | <b>32.84</b>           |
| DJ694;2.1,1079(14)                            | Bg2;3.3,1079     | 07-12-19    | 1.03                                                                              | <b>26.26</b>           |
| DJ694;2.1,1079(14)                            | Bg2;3.3,1079     | 07-12-19    | 0.88                                                                              | <b>22.25</b>           |
| DJ694;2.1,1079(14)                            | Bg2;3.3,1079     | 07-12-19    | 1.55                                                                              | <b>39.37</b>           |
| DJ694;2.1,1079(13)                            | Bg2;3.3,1079     | 08-02-10    | 0.74                                                                              | <b>14.13</b>           |
| DJ694;2.1,1079(13)                            | Bg2;3.3,1079     | 08-02-10    | 0.80                                                                              | <b>15.28</b>           |
| DJ694;2.1,1079(14)                            | Bg2;3.3,1079     | 08-02-10    | 0.07                                                                              | <b>1.41</b>            |
| DJ694;2.1,1079(14)                            | Bg2;3.3,1079     | 08-02-10    | 1.05                                                                              | <b>20.08</b>           |
| DJ694;2.1,1079(14)                            | Bg2;3.3,1079     | 08-02-10    | 1.36                                                                              | <b>26.06</b>           |
| <b>DJ694 + 2 copies 3.3 + 2 copies DJ1077</b> |                  |             |                                                                                   |                        |
| DJ694;3.3,1077                                | Bg2;3.3,1077     | 07-11-13    | 0.51                                                                              | <b>17.84</b>           |
| DJ694;3.3,1077                                | Bg2;3.3,1077     | 07-11-13    | 0.37                                                                              | <b>12.89</b>           |
| DJ694;3.3,1077                                | Bg2;3.3,1077     | 07-11-13    | 0.54                                                                              | <b>18.92</b>           |
| DJ694;3.3,1077                                | Bg2;3.3,1077     | 07-11-30    | 0.53                                                                              | <b>22.31</b>           |
| DJ694;3.3,1077                                | Bg2;3.3,1077     | 07-11-30    | 0.57                                                                              | <b>23.82</b>           |
| DJ694;3.3,1077                                | Bg2;3.3,1077     | 07-11-30    | 0.67                                                                              | <b>28.21</b>           |
| DJ694;3.3,1077                                | Bg2;3.3,1077     | 07-12-19    | 0.81                                                                              | <b>20.71</b>           |
| DJ694;3.3,1077                                | Bg2;3.3,1077     | 07-12-19    | 0.84                                                                              | <b>21.42</b>           |
| DJ694;3.3,1077                                | Bg2;3.3,1077     | 07-12-19    | 0.78                                                                              | <b>19.93</b>           |
| DJ694;3.3,1077                                | Bg2;3.3,1077     | 07-12-19    | 1.20                                                                              | <b>30.47</b>           |
| DJ694;3.3,1077                                | Bg2;3.3,1077     | 07-12-19    | 1.07                                                                              | <b>27.16</b>           |
| DJ694;3.3,1077                                | Bg2;3.3,1077     | 07-12-19    | 0.96                                                                              | <b>24.32</b>           |
| DJ694;3.3,1077                                | Bg2;3.3,1077     | 08-02-10    | 0.65                                                                              | <b>12.45</b>           |
| DJ694;3.3,1077                                | Bg2;3.3,1077     | 08-02-10    | 0.80                                                                              | <b>15.36</b>           |
| DJ694;3.3,1077                                | Bg2;3.3,1077     | 08-02-10    | 0.79                                                                              | <b>15.03</b>           |
| DJ694;3.3,1077                                | Bg2;3.3,1077     | 08-02-22    | 1.74                                                                              | <b>20.10</b>           |
| DJ694;3.3,1077                                | Bg2;3.3,1077     | 08-02-22    | 1.49                                                                              | <b>17.17</b>           |
| DJ694;3.3,1077                                | Bg2;3.3,1077     | 08-02-22    | 1.59                                                                              | <b>18.33</b>           |

| Parents                                       |                  | Date     | Specific activity                 | % DJ694 control |
|-----------------------------------------------|------------------|----------|-----------------------------------|-----------------|
| Male                                          | Female           |          | $\Delta$ mod/min/ $\mu$ g protein |                 |
| <b>DJ694 + 2 copies 3.3 + DJ1077 + DJ1079</b> |                  |          |                                   |                 |
| DJ694;3.3,1077                                | Bg2;3.3,1079     | 07-11-13 | 0.36                              | 12.76           |
| DJ694;3.3,1077                                | Bg2;3.3,1079     | 07-11-13 | 0.54                              | 19.09           |
| DJ694;3.3,1077                                | Bg2;3.3,1079     | 07-11-13 | 0.34                              | 12.00           |
| DJ694;3.3,1077                                | Bg2;3.3,1079     | 07-11-30 | 0.40                              | 16.81           |
| DJ694;3.3,1077                                | Bg2;3.3,1079     | 07-11-30 | 0.32                              | 13.55           |
| DJ694;3.3,1077                                | Bg2;3.3,1079     | 07-11-30 | 0.48                              | 20.25           |
| DJ694;3.3,1077                                | Bg2;3.3,1079     | 07-12-19 | 1.38                              | 35.00           |
| DJ694;3.3,1077                                | Bg2;3.3,1079     | 07-12-19 | 1.74                              | 44.29           |
| DJ694;3.3,1077                                | Bg2;3.3,1079     | 07-12-19 | 1.42                              | 36.09           |
| DJ694;3.3,1077                                | Bg2;3.3,1079     | 07-12-19 | 0.97                              | 24.67           |
| DJ694;3.3,1077                                | Bg2;3.3,1079     | 07-12-19 | 1.47                              | 37.32           |
| DJ694;3.3,1077                                | Bg2;3.3,1079     | 07-12-19 | 0.84                              | 21.30           |
| DJ694;3.3,1077                                | Bg2;3.3,1079     | 08-02-10 | 0.48                              | 9.14            |
| DJ694;3.3,1077                                | Bg2;3.3,1079     | 08-02-10 | 0.90                              | 17.12           |
| DJ694;3.3,1077                                | Bg2;3.3,1079     | 08-02-10 | 0.89                              | 17.06           |
| <b>DJ694 + 2.1 + 3.3 + DJ1077 + DJ1080</b>    |                  |          |                                   |                 |
| DJ694;1077,1080                               | Bg2;2.1,3.3      | 07-06-15 | 2.08                              | 15.14           |
| DJ694;1077,1080                               | Bg2;2.1,3.3      | 07-06-15 | 1.48                              | 10.80           |
| DJ694;1077,1080                               | Bg2;2.1,3.3      | 07-06-15 | 1.57                              | 11.42           |
| DJ694;1077,1080                               | Bg2;2.1,3.3      | 07-07-04 | 0.89                              | 24.13           |
| DJ694;1077,1080                               | Bg2;2.1,3.3      | 07-07-04 | 1.31                              | 35.73           |
| DJ694;1077,1080                               | Bg2;2.1,3.3      | 07-07-04 | 1.16                              | 31.59           |
| DJ694;2.1,3.3                                 | Bg2;1077,1080    | 07-05-31 | 0.30                              | 9.24            |
| DJ694;2.1,3.3                                 | Bg2;1077,1080    | 07-05-31 | 0.41                              | 12.47           |
| DJ694;2.1,3.3                                 | Bg2;1077,1080    | 07-05-31 | 0.12                              | 3.75            |
| DJ694;2.1,3.3                                 | Bg2;1077,1080    | 07-05-31 | 0.29                              | 8.77            |
| DJ694;2.1,3.3                                 | Bg2;1077,1080    | 07-05-31 | 0.10                              | 3.06            |
| <b>DJ694 + 2.1 + 3.3 + DJ1080 + DJ1083</b>    |                  |          |                                   |                 |
| DJ694;1080,1083                               | Bg2;2.1,3.3      | 07-05-31 | 0.84                              | 25.90           |
| DJ694;1080,1083                               | Bg2;2.1,3.3      | 07-05-31 | 1.42                              | 43.59           |
| DJ694;1080,1083                               | Bg2;2.1,3.3      | 07-05-31 | 0.92                              | 28.19           |
| <b>DJ694 + 2.1 + 2 copies DJ1077 + DJ1079</b> |                  |          |                                   |                 |
| DJ694;1077,1079                               | Bg2;2.1,1077     | 07-12-19 | 1.22                              | 30.94           |
| DJ694;1077,1079                               | Bg2;2.1,1077     | 07-12-19 | 1.09                              | 27.71           |
| DJ694;1077,1079                               | Bg2;2.1,1077     | 07-12-19 | 1.09                              | 27.64           |
| <b>DJ694 + 2.1 + DJ1077 + 2 copies DJ1079</b> |                  |          |                                   |                 |
| DJ694;1077,1079                               | Bg2;2.1,1079(14) | 07-12-19 | 1.00                              | 25.36           |
| DJ694;1077,1079                               | Bg2;2.1,1079(14) | 07-12-19 | 0.82                              | 20.87           |

L3 larvae

| Parents                                       |                  | Date     | Specific activity<br>$\Delta$ mOD/min/ $\mu$ g protein | % DJ694 control |
|-----------------------------------------------|------------------|----------|--------------------------------------------------------|-----------------|
| Male                                          | Female           |          |                                                        |                 |
| DJ694;1077,1079                               | Bg2;2.1,1079(14) | 07-12-19 | 0.83                                                   | 21.16           |
| <b>DJ694 + 3.3 + 2 copies DJ1077 + DJ1079</b> |                  |          |                                                        |                 |
| DJ694;1077,1079                               | Bg2;3.3,1077     | 07-12-19 | 1.19                                                   | 30.19           |
| DJ694;1077,1079                               | Bg2;3.3,1077     | 07-12-19 | 0.92                                                   | 23.48           |
| DJ694;1077,1079                               | Bg2;3.3,1077     | 07-12-19 | 1.18                                                   | 29.99           |
| <b>DJ694 + 3.3 + DJ1077 + 2 copies DJ1079</b> |                  |          |                                                        |                 |
| DJ694;1077,1079                               | Bg2;3.3,1079     | 07-12-19 | 1.20                                                   | 30.51           |
| DJ694;1077,1079                               | Bg2;3.3,1079     | 07-12-19 | 1.04                                                   | 26.55           |
| DJ694;1077,1079                               | Bg2;3.3,1079     | 07-12-19 | 1.32                                                   | 33.62           |
| <b>DJ694 + 2.1 + 2 copies DJ1077 + DJ1080</b> |                  |          |                                                        |                 |
| DJ694;1077,1080                               | Bg2;2.1,1077     | 08-02-10 | 0.79                                                   | 15.19           |
| DJ694;1077,1080                               | Bg2;2.1,1077     | 08-02-10 | 0.74                                                   | 14.07           |
| DJ694;1077,1080                               | Bg2;2.1,1077     | 08-02-10 | 0.67                                                   | 12.80           |
| DJ694;2.1,1077                                | Bg2;1077,1080    | 08-02-10 | 1.12                                                   | 21.45           |
| DJ694;2.1,1077                                | Bg2;1077,1080    | 08-02-10 | 0.86                                                   | 16.49           |
| DJ694;2.1,1077                                | Bg2;1077,1080    | 08-02-10 | 0.72                                                   | 13.78           |
| <b>DJ694 + 2.1 + DJ1077 + DJ1079 + DJ1080</b> |                  |          |                                                        |                 |
| DJ694;1077,1080                               | Bg2;2.1,1079(13) | 08-02-10 | 0.51                                                   | 9.70            |
| DJ694;1077,1080                               | Bg2;2.1,1079(13) | 08-02-10 | 1.22                                                   | 23.43           |
| DJ694;1077,1080                               | Bg2;2.1,1079(13) | 08-02-10 | 0.68                                                   | 12.96           |
| DJ694;1077,1080                               | Bg2;2.1,1079(14) | 08-02-10 | 0.88                                                   | 16.79           |
| DJ694;1077,1080                               | Bg2;2.1,1079(14) | 08-02-10 | 0.68                                                   | 12.96           |
| DJ694;1077,1080                               | Bg2;2.1,1079(14) | 08-02-10 | 0.74                                                   | 14.23           |
| DJ694;2.1,1079(13)                            | Bg2;1077,1080    | 08-02-10 | 0.32                                                   | 6.13            |
| DJ694;2.1,1079(13)                            | Bg2;1077,1080    | 08-02-10 | 0.18                                                   | 3.49            |
| DJ694;2.1,1079(14)                            | Bg2;1077,1080    | 08-02-10 | 0.99                                                   | 18.88           |
| DJ694;2.1,1079(14)                            | Bg2;1077,1080    | 08-02-10 | 0.86                                                   | 16.47           |
| DJ694;2.1,1079(14)                            | Bg2;1077,1080    | 08-02-10 | 1.09                                                   | 20.77           |
| <b>DJ694 + 3.3 + 2 copies DJ1077 + DJ1080</b> |                  |          |                                                        |                 |
| DJ694;1077,1080                               | Bg2;3.3,1077     | 08-02-10 | 0.74                                                   | 14.21           |
| DJ694;1077,1080                               | Bg2;3.3,1077     | 08-02-10 | 0.77                                                   | 14.79           |
| DJ694;1077,1080                               | Bg2;3.3,1077     | 08-02-10 | 0.84                                                   | 15.98           |
| DJ694;3.3,1077                                | Bg2;1077,1080    | 08-02-10 | 0.65                                                   | 12.51           |
| DJ694;3.3,1077                                | Bg2;1077,1080    | 08-02-10 | 0.66                                                   | 12.69           |
| DJ694;3.3,1077                                | Bg2;1077,1080    | 08-02-10 | 0.69                                                   | 13.24           |
| <b>DJ694 + 3.3 + DJ1077 + DJ1079 + DJ1080</b> |                  |          |                                                        |                 |
| DJ694;1077,1080                               | Bg2;3.3,1079     | 08-02-10 | 1.05                                                   | 20.06           |
| DJ694;1077,1080                               | Bg2;3.3,1079     | 08-02-10 | 1.52                                                   | 29.10           |
| DJ694;1077,1080                               | Bg2;3.3,1079     | 08-02-10 | 0.93                                                   | 17.73           |

L3 larvae

| Parents                                       |               | Date     | Specific activity                 | % DJ694 control |
|-----------------------------------------------|---------------|----------|-----------------------------------|-----------------|
| Male                                          | Female        |          | $\Delta$ mOD/min/ $\mu$ g protein |                 |
| <b>DJ694 + 2.1 + DJ1077 + DJ1080 + DJ1083</b> |               |          |                                   |                 |
| DJ694;2.1,1077                                | Bg2;1080,1083 | 08-02-10 | 0.69                              | 13.16           |
| DJ694;2.1,1077                                | Bg2;1080,1083 | 08-02-10 | 0.76                              | 14.56           |
| DJ694;2.1,1077                                | Bg2;1080,1083 | 08-02-10 | 0.76                              | 14.63           |
| <b>DJ694 + 2.1 + DJ1079 + DJ1080 + DJ1083</b> |               |          |                                   |                 |
| DJ694;2.1,1079(13)                            | Bg2;1080,1083 | 08-02-10 | 0.54                              | 10.27           |
| DJ694;2.1,1079(13)                            | Bg2;1080,1083 | 08-02-10 | 0.62                              | 11.88           |
| DJ694;2.1,1079(13)                            | Bg2;1080,1083 | 08-02-10 | 0.57                              | 10.86           |
| DJ694;2.1,1079(14)                            | Bg2;1080,1083 | 08-02-10 | 0.85                              | 16.24           |
| DJ694;2.1,1079(14)                            | Bg2;1080,1083 | 08-02-10 | 1.24                              | 23.76           |
| DJ694;2.1,1079(14)                            | Bg2;1080,1083 | 08-02-10 | 1.33                              | 25.39           |
| <b>DJ694 + 3.3 + DJ1077 + DJ1080 + DJ1083</b> |               |          |                                   |                 |
| DJ694;3.3,1077                                | Bg2;1080,1083 | 08-02-10 | 0.58                              | 11.06           |
| DJ694;3.3,1077                                | Bg2;1080,1083 | 08-02-10 | 0.63                              | 12.11           |
| DJ694;3.3,1077                                | Bg2;1080,1083 | 08-02-10 | 0.55                              | 10.50           |



*Supplemental Table 6: UAS-lacZ assay EP data set.*

% DJ694 control: specific activity normalized to the positive control, bolded values are significantly different ( $p < 0.05$ ) from the positive control.

| Parents                        |               | Date      | Specific activity                 | % DJ694 control |
|--------------------------------|---------------|-----------|-----------------------------------|-----------------|
| Male                           | Female        |           | $\Delta$ mOD/min/ $\mu$ g protein |                 |
| <b>DJ694 + DJ1077</b>          |               |           |                                   |                 |
| DJ694;1077                     | Bg2           | 15-Jun-07 | 4.13                              | <b>49.47</b>    |
| DJ694;1077                     | Bg2           | 15-Jun-07 | 3.99                              | <b>47.72</b>    |
| DJ694;1077                     | Bg2           | 15-Jun-07 | 4.09                              | <b>48.93</b>    |
| DJ694;1077                     | Bg2           | 04-Jul-07 | 1.47                              | <b>65.16</b>    |
| DJ694;1077                     | Bg2           | 04-Jul-07 | 1.30                              | <b>57.32</b>    |
| DJ694;1077                     | Bg2           | 04-Jul-07 | 1.32                              | <b>58.44</b>    |
| DJ694;1077                     | Bg2           | 31-May-07 | 3.09                              | <b>62.66</b>    |
| DJ694;1077                     | Bg2           | 31-May-07 | 2.68                              | <b>54.49</b>    |
| DJ694;1077                     | Bg2           | 31-May-07 | 3.52                              | <b>71.39</b>    |
| DJ694;1077                     | Bg2           | 31-May-07 | 3.75                              | <b>76.06</b>    |
| DJ694;1077                     | Bg2           | 31-May-07 | 2.36                              | <b>47.85</b>    |
| <b>DJ694 + DJ1080</b>          |               |           |                                   |                 |
| DJ694;1080                     | Bg2           | 15-Jun-07 | 6.68                              | 79.95           |
| DJ694;1080                     | Bg2           | 15-Jun-07 | 8.13                              | 97.34           |
| DJ694;1080                     | Bg2           | 15-Jun-07 | 6.74                              | 80.65           |
| DJ694;1080                     | Bg2           | 31-May-07 | 4.31                              | 87.39           |
| DJ694;1080                     | Bg2           | 31-May-07 | 4.80                              | 97.39           |
| DJ694;1080                     | Bg2           | 31-May-07 | 3.56                              | 72.30           |
| DJ694;1080                     | Bg2           | 31-May-07 | 4.18                              | 84.94           |
| DJ694;1080                     | Bg2           | 31-May-07 | 2.50                              | 50.79           |
| DJ694;1080                     | Bg2           | 04-Jul-07 | 1.97                              | 87.11           |
| DJ694;1080                     | Bg2           | 04-Jul-07 | 2.08                              | 91.88           |
| DJ694;1080                     | Bg2           | 04-Jul-07 | 2.13                              | 94.06           |
| <b>DJ694 + DJ1077 + DJ1080</b> |               |           |                                   |                 |
| DJ694                          | Bg2;1077,1080 | 03-Aug-07 | 1.33                              | <b>46.34</b>    |
| DJ694                          | Bg2;1077,1080 | 03-Aug-07 | 1.90                              | <b>66.34</b>    |
| DJ694                          | Bg2;1077,1080 | 03-Aug-07 | 1.77                              | <b>61.95</b>    |
| DJ694                          | Bg2;1077,1080 | 15-Aug-07 | 1.21                              | 86.84           |
| DJ694                          | Bg2;1077,1080 | 15-Aug-07 | 0.97                              | 69.63           |
| DJ694                          | Bg2;1077,1080 | 15-Aug-07 | 1.15                              | 82.01           |
| DJ694                          | Bg2;1077,1080 | 30-Jul-07 | 1.20                              | <b>67.26</b>    |
| DJ694                          | Bg2;1077,1080 | 30-Jul-07 | 0.91                              | <b>51.23</b>    |
| DJ694                          | Bg2;1077,1080 | 30-Jul-07 | 0.68                              | <b>38.22</b>    |
| DJ694;1077,1080                | Bg2           | 15-Jun-07 | 5.01                              | <b>59.93</b>    |
| DJ694;1077,1080                | Bg2           | 15-Jun-07 | 5.67                              | <b>67.82</b>    |
| DJ694;1077,1080                | Bg2           | 15-Jun-07 | 4.09                              | <b>48.94</b>    |
| DJ694;1077,1080                | Bg2           | 04-Jul-07 | 0.94                              | <b>41.50</b>    |
| DJ694;1077,1080                | Bg2           | 04-Jul-07 | 1.39                              | <b>61.35</b>    |

| Parents                                 |               | Date      | Specific activity<br>$\Delta$ mOD/min/ $\mu$ g protein | % DJ694 control |
|-----------------------------------------|---------------|-----------|--------------------------------------------------------|-----------------|
| Male                                    | Female        |           |                                                        |                 |
| DJ694;1077,1080                         | Bg2           | 04-Jul-07 | 0.85                                                   | 37.46           |
| <b>DJ694 + DJ1080 + DJ1083</b>          |               |           |                                                        |                 |
| DJ694                                   | Bg2;1080,1083 | 15-Aug-07 | 2.15                                                   | 154.06          |
| DJ694                                   | Bg2;1080,1083 | 15-Aug-07 | 1.59                                                   | 113.71          |
| DJ694                                   | Bg2;1080,1083 | 15-Aug-07 | 1.40                                                   | 100.32          |
| DJ694                                   | Bg2;1080,1083 | 15-Jun-07 | 8.60                                                   | 102.95          |
| DJ694                                   | Bg2;1080,1083 | 15-Jun-07 | 6.73                                                   | 80.57           |
| DJ694                                   | Bg2;1080,1083 | 15-Jun-07 | 6.82                                                   | 81.62           |
| DJ694                                   | Bg2;1080,1083 | 04-Jul-07 | 1.14                                                   | 50.55           |
| DJ694                                   | Bg2;1080,1083 | 04-Jul-07 | 1.81                                                   | 79.91           |
| DJ694                                   | Bg2;1080,1083 | 04-Jul-07 | 1.46                                                   | 64.58           |
| DJ694                                   | Bg2;1080,1083 | 12-Jul-07 | 1.28                                                   | 47.88           |
| DJ694                                   | Bg2;1080,1083 | 12-Jul-07 | 1.85                                                   | 69.16           |
| DJ694                                   | Bg2;1080,1083 | 12-Jul-07 | 2.37                                                   | 88.66           |
| <b>DJ694 + DJ1077 + DJ1079</b>          |               |           |                                                        |                 |
| DJ694;1077,1079                         | Bg2           | 15-Aug-07 | 0.63                                                   | 44.98           |
| DJ694;1077,1079                         | Bg2           | 15-Aug-07 | 0.69                                                   | 49.51           |
| DJ694;1077,1079                         | Bg2           | 15-Aug-07 | 0.90                                                   | 64.28           |
| DJ694;1077,1079                         | Bg2           | 15-Jun-07 | 3.24                                                   | <b>38.83</b>    |
| DJ694;1077,1079                         | Bg2           | 15-Jun-07 | 3.24                                                   | <b>38.78</b>    |
| DJ694;1077,1079                         | Bg2           | 15-Jun-07 | 3.87                                                   | <b>46.34</b>    |
| DJ694;1077,1079                         | Bg2           | 04-Jul-07 | 1.08                                                   | <b>47.55</b>    |
| DJ694;1077,1079                         | Bg2           | 04-Jul-07 | 1.18                                                   | <b>52.31</b>    |
| DJ694;1077,1079                         | Bg2           | 04-Jul-07 | 1.05                                                   | <b>46.56</b>    |
| <b>DJ694 + 2 copies DJ1077 + DJ1080</b> |               |           |                                                        |                 |
| DJ694;1077                              | Bg2;1077,1080 | 03-Aug-07 | 0.41                                                   | <b>14.46</b>    |
| DJ694;1077                              | Bg2;1077,1080 | 03-Aug-07 | 0.79                                                   | <b>27.61</b>    |
| DJ694;1077                              | Bg2;1077,1080 | 03-Aug-07 | 0.60                                                   | <b>20.95</b>    |
| DJ694;1077                              | Bg2;1077,1080 | 12-Jul-07 | 0.34                                                   | <b>12.87</b>    |
| DJ694;1077                              | Bg2;1077,1080 | 12-Jul-07 | 0.28                                                   | <b>10.42</b>    |
| DJ694;1077                              | Bg2;1077,1080 | 12-Jul-07 | 0.33                                                   | <b>12.30</b>    |
| DJ694;1077                              | Bg2;1077,1080 | 30-Jul-07 | 0.33                                                   | <b>18.33</b>    |
| DJ694;1077                              | Bg2;1077,1080 | 30-Jul-07 | 0.64                                                   | <b>35.89</b>    |
| DJ694;1077                              | Bg2;1077,1080 | 30-Jul-07 | 0.30                                                   | <b>16.54</b>    |
| <b>DJ694 + DJ1077 + DJ1080 + DJ1083</b> |               |           |                                                        |                 |
| DJ694;1077                              | Bg2;1080,1083 | 03-Aug-07 | 0.74                                                   | <b>25.82</b>    |
| DJ694;1077                              | Bg2;1080,1083 | 03-Aug-07 | 0.57                                                   | <b>20.00</b>    |
| DJ694;1077                              | Bg2;1080,1083 | 03-Aug-07 | 0.78                                                   | <b>27.25</b>    |
| DJ694;1077                              | Bg2;1080,1083 | 15-Aug-07 | 0.42                                                   | 29.99           |

| Parents                                          |               | Date      | Specific activity<br>$\Delta$ mOD/min/ $\mu$ g protein | % DJ694 control |
|--------------------------------------------------|---------------|-----------|--------------------------------------------------------|-----------------|
| Male                                             | Female        |           |                                                        |                 |
| DJ694;1077                                       | Bg2;1080,1083 | 15-Aug-07 | 0.67                                                   | 47.98           |
| DJ694;1077                                       | Bg2;1080,1083 | 15-Aug-07 | 0.52                                                   | 37.53           |
| DJ694;1077                                       | Bg2;1080,1083 | 30-Jul-07 | 0.41                                                   | <b>22.70</b>    |
| DJ694;1077                                       | Bg2;1080,1083 | 30-Jul-07 | 0.63                                                   | <b>35.48</b>    |
| DJ694;1077                                       | Bg2;1080,1083 | 30-Jul-07 | 0.61                                                   | <b>34.23</b>    |
| <b>DJ694 + DJ1077 + 2 copies DJ1080</b>          |               |           |                                                        |                 |
| DJ694;1080                                       | Bg2;1077,1080 | 03-Aug-07 | 0.75                                                   | <b>26.27</b>    |
| DJ694;1080                                       | Bg2;1077,1080 | 03-Aug-07 | 0.77                                                   | <b>26.83</b>    |
| DJ694;1080                                       | Bg2;1077,1080 | 03-Aug-07 | 0.88                                                   | <b>30.58</b>    |
| DJ694;1080                                       | Bg2;1077,1080 | 15-Aug-07 | 0.42                                                   | 29.97           |
| DJ694;1080                                       | Bg2;1077,1080 | 15-Aug-07 | 0.45                                                   | 32.07           |
| DJ694;1080                                       | Bg2;1077,1080 | 15-Aug-07 | 0.40                                                   | 28.95           |
| DJ694;1080                                       | Bg2;1077,1080 | 12-Jul-07 | 0.47                                                   | <b>17.67</b>    |
| DJ694;1080                                       | Bg2;1077,1080 | 12-Jul-07 | 0.35                                                   | <b>13.05</b>    |
| DJ694;1080                                       | Bg2;1077,1080 | 12-Jul-07 | 0.46                                                   | <b>17.37</b>    |
| DJ694;1080                                       | Bg2;1077,1080 | 30-Jul-07 | 0.36                                                   | <b>20.13</b>    |
| DJ694;1080                                       | Bg2;1077,1080 | 30-Jul-07 | 0.39                                                   | <b>21.74</b>    |
| DJ694;1080                                       | Bg2;1077,1080 | 30-Jul-07 | 0.32                                                   | <b>17.97</b>    |
| <b>DJ694 + 2 copies DJ1080 + DJ1083</b>          |               |           |                                                        |                 |
| DJ694;1080                                       | Bg2;1080,1083 | 03-Aug-07 | 1.33                                                   | <b>46.40</b>    |
| DJ694;1080                                       | Bg2;1080,1083 | 03-Aug-07 | 0.95                                                   | <b>33.05</b>    |
| DJ694;1080                                       | Bg2;1080,1083 | 03-Aug-07 | 1.14                                                   | <b>39.80</b>    |
| DJ694;1080                                       | Bg2;1080,1083 | 15-Aug-07 | 0.64                                                   | 45.65           |
| DJ694;1080                                       | Bg2;1080,1083 | 15-Aug-07 | 0.71                                                   | 50.74           |
| DJ694;1080                                       | Bg2;1080,1083 | 15-Aug-07 | 0.72                                                   | 51.30           |
| DJ694;1080                                       | Bg2;1080,1083 | 30-Jul-07 | 0.64                                                   | <b>36.02</b>    |
| DJ694;1080                                       | Bg2;1080,1083 | 30-Jul-07 | 0.74                                                   | <b>41.28</b>    |
| DJ694;1080                                       | Bg2;1080,1083 | 30-Jul-07 | 0.65                                                   | <b>36.21</b>    |
| <b>DJ694 + 2 copies DJ1077 + DJ1079 + DJ1080</b> |               |           |                                                        |                 |
| DJ694;1077,1079                                  | Bg2;1077,1080 | 15-Jun-07 | 0.70                                                   | <b>8.39</b>     |
| DJ694;1077,1079                                  | Bg2;1077,1080 | 15-Jun-07 | 0.91                                                   | <b>10.93</b>    |
| DJ694;1077,1079                                  | Bg2;1077,1080 | 15-Jun-07 | 0.72                                                   | <b>8.58</b>     |
| DJ694;1077,1079                                  | Bg2;1077,1080 | 04-Jul-07 | 0.39                                                   | <b>17.39</b>    |
| DJ694;1077,1079                                  | Bg2;1077,1080 | 04-Jul-07 | 0.45                                                   | <b>20.08</b>    |
| DJ694;1077,1079                                  | Bg2;1077,1080 | 04-Jul-07 | 0.47                                                   | <b>20.98</b>    |
| <b>DJ694 + DJ1077 + DJ1079 + DJ1080 + DJ1083</b> |               |           |                                                        |                 |
| DJ694;1077,1079                                  | Bg2;1080,1083 | 04-Jul-07 | 0.70                                                   | <b>30.71</b>    |
| DJ694;1077,1079                                  | Bg2;1080,1083 | 04-Jul-07 | 0.62                                                   | <b>27.28</b>    |
| DJ694;1077,1079                                  | Bg2;1080,1083 | 04-Jul-07 | 0.50                                                   | <b>22.17</b>    |

| Parents                                          |               | Date      | Specific activity<br>$\Delta$ mOD/min/ $\mu$ g protein | % DJ694 control |
|--------------------------------------------------|---------------|-----------|--------------------------------------------------------|-----------------|
| Male                                             | Female        |           |                                                        |                 |
| DJ694;1077,1079                                  | Bg2;1080,1083 | 12-Jul-07 | 0.53                                                   | 19.72           |
| DJ694;1077,1079                                  | Bg2;1080,1083 | 12-Jul-07 | 0.45                                                   | 16.99           |
| DJ694;1077,1079                                  | Bg2;1080,1083 | 12-Jul-07 | 0.50                                                   | 18.58           |
| <b>DJ694 + 2 copies DJ1077 + 2 copies DJ1080</b> |               |           |                                                        |                 |
| DJ694;1077,1080                                  | Bg2;1077,1080 | 15-Jun-07 | 1.34                                                   | 16.02           |
| DJ694;1077,1080                                  | Bg2;1077,1080 | 15-Jun-07 | 1.41                                                   | 16.89           |
| DJ694;1077,1080                                  | Bg2;1077,1080 | 15-Jun-07 | 0.68                                                   | 8.15            |
| DJ694;1077,1080                                  | Bg2;1077,1080 | 31-May-07 | 0.75                                                   | 15.22           |
| DJ694;1077,1080                                  | Bg2;1077,1080 | 31-May-07 | 0.89                                                   | 18.06           |
| DJ694;1077,1080                                  | Bg2;1077,1080 | 31-May-07 | 0.62                                                   | 12.65           |
| DJ694;1077,1080                                  | Bg2;1077,1080 | 31-May-07 | 0.62                                                   | 12.63           |
| DJ694;1077,1080                                  | Bg2;1077,1080 | 10-Feb-08 | 0.58                                                   | 14.38           |
| DJ694;1077,1080                                  | Bg2;1077,1080 | 10-Feb-08 | 1.09                                                   | 26.99           |
| DJ694;1077,1080                                  | Bg2;1077,1080 | 10-Feb-08 | 0.83                                                   | 20.71           |
| DJ694;1077,1080                                  | Bg2;1077,1080 | 04-Jul-07 | 0.56                                                   | 24.85           |
| DJ694;1077,1080                                  | Bg2;1077,1080 | 04-Jul-07 | 0.71                                                   | 31.38           |
| DJ694;1077,1080                                  | Bg2;1077,1080 | 04-Jul-07 | 0.39                                                   | 17.20           |
| <b>DJ694 + DJ1077 + 2 copies DJ1080 + DJ1083</b> |               |           |                                                        |                 |
| DJ694;1077,1080                                  | Bg2;1080,1083 | 10-Feb-08 | 1.84                                                   | 45.65           |
| DJ694;1077,1080                                  | Bg2;1080,1083 | 10-Feb-08 | 1.79                                                   | 44.32           |
| DJ694;1077,1080                                  | Bg2;1080,1083 | 10-Feb-08 | 3.10                                                   | 77.06           |
| <b>DJ694 + 2.1</b>                               |               |           |                                                        |                 |
| DJ694;2.1                                        | Bg2           | 15-Jun-07 | 6.97                                                   | 83.38           |
| DJ694;2.1                                        | Bg2           | 15-Jun-07 | 7.69                                                   | 92.10           |
| DJ694;2.1                                        | Bg2           | 15-Jun-07 | 7.53                                                   | 90.17           |
| DJ694;2.1                                        | Bg2           | 31-May-07 | 4.74                                                   | 96.29           |
| DJ694;2.1                                        | Bg2           | 31-May-07 | 4.69                                                   | 95.18           |
| DJ694;2.1                                        | Bg2           | 31-May-07 | 4.87                                                   | 98.93           |
| DJ694;2.1                                        | Bg2           | 31-May-07 | 3.25                                                   | 65.91           |
| DJ694;2.1                                        | Bg2           | 31-May-07 | 4.74                                                   | 96.30           |
| DJ694;2.1                                        | Bg2           | 04-Jul-07 | 2.56                                                   | 113.29          |
| DJ694;2.1                                        | Bg2           | 04-Jul-07 | 2.42                                                   | 107.08          |
| DJ694;2.1                                        | Bg2           | 04-Jul-07 | 2.70                                                   | 119.21          |
| <b>DJ694 + 3.3</b>                               |               |           |                                                        |                 |
| DJ694;3.3                                        | Bg2           | 15-Jun-07 | 6.92                                                   | 82.87           |
| DJ694;3.3                                        | Bg2           | 15-Jun-07 | 8.71                                                   | 104.26          |
| DJ694;3.3                                        | Bg2           | 15-Jun-07 | 7.65                                                   | 91.62           |
| DJ694;3.3                                        | Bg2           | 31-May-07 | 4.23                                                   | 85.85           |
| DJ694;3.3                                        | Bg2           | 31-May-07 | 4.24                                                   | 86.06           |

| Parents                           |              | Date      | Specific activity<br>$\Delta$ mOD/min/ $\mu$ g protein | % DJ694 control |
|-----------------------------------|--------------|-----------|--------------------------------------------------------|-----------------|
| Male                              | Female       |           |                                                        |                 |
| DJ694;3.3                         | Bg2          | 31-May-07 | 4.32                                                   | 87.60           |
| DJ694;3.3                         | Bg2          | 31-May-07 | 3.55                                                   | 72.05           |
| DJ694;3.3                         | Bg2          | 31-May-07 | 3.75                                                   | 76.13           |
| DJ694;3.3                         | Bg2          | 04-Jul-07 | 1.83                                                   | 81.05           |
| DJ694;3.3                         | Bg2          | 04-Jul-07 | 1.94                                                   | 85.75           |
| DJ694;3.3                         | Bg2          | 04-Jul-07 | 2.14                                                   | 94.62           |
| <b>DJ694 + 2.1 + 3.3</b>          |              |           |                                                        |                 |
| DJ694                             | Bg2;2.1,3.3  | 04-Jul-07 | 1.36                                                   | 60.30           |
| DJ694                             | Bg2;2.1,3.3  | 04-Jul-07 | 1.61                                                   | 70.97           |
| DJ694                             | Bg2;2.1,3.3  | 04-Jul-07 | 2.44                                                   | 107.96          |
| DJ694                             | Bg2;2.1,3.3  | 12-Jul-07 | 1.68                                                   | <b>62.84</b>    |
| DJ694                             | Bg2;2.1,3.3  | 12-Jul-07 | 1.41                                                   | <b>52.81</b>    |
| DJ694                             | Bg2;2.1,3.3  | 12-Jul-07 | 1.33                                                   | <b>49.76</b>    |
| <b>DJ694 + 2 copies 2.1 + 3.3</b> |              |           |                                                        |                 |
| DJ694;2.1                         | Bg2;2.1,3.3  | 03-Aug-07 | 1.81                                                   | <b>63.01</b>    |
| DJ694;2.1                         | Bg2;2.1,3.3  | 03-Aug-07 | 1.80                                                   | <b>62.73</b>    |
| DJ694;2.1                         | Bg2;2.1,3.3  | 03-Aug-07 | 1.80                                                   | <b>62.66</b>    |
| DJ694;2.1                         | Bg2;2.1,3.3  | 15-Aug-07 | 1.02                                                   | 73.14           |
| DJ694;2.1                         | Bg2;2.1,3.3  | 15-Aug-07 | 1.75                                                   | 125.27          |
| DJ694;2.1                         | Bg2;2.1,3.3  | 15-Aug-07 | 1.53                                                   | 109.88          |
| DJ694;2.1                         | Bg2;2.1,3.3  | 12-Jul-07 | 1.75                                                   | <b>65.64</b>    |
| DJ694;2.1                         | Bg2;2.1,3.3  | 12-Jul-07 | 1.72                                                   | <b>64.39</b>    |
| DJ694;2.1                         | Bg2;2.1,3.3  | 12-Jul-07 | 1.71                                                   | <b>64.07</b>    |
| DJ694;2.1                         | Bg2;2.1,3.3  | 30-Jul-07 | 1.69                                                   | 94.50           |
| DJ694;2.1                         | Bg2;2.1,3.3  | 30-Jul-07 | 1.99                                                   | 111.71          |
| DJ694;2.1                         | Bg2;2.1,3.3  | 30-Jul-07 | 0.72                                                   | 40.41           |
| <b>DJ694 + 2.1 + 2 copies 3.3</b> |              |           |                                                        |                 |
| DJ694;3.3                         | Bg2;2.1,3.3  | 15-Aug-07 | 1.52                                                   | 108.56          |
| DJ694;3.3                         | Bg2;2.1,3.3  | 15-Aug-07 | 1.09                                                   | 78.21           |
| DJ694;3.3                         | Bg2;2.1,3.3  | 15-Aug-07 | 0.82                                                   | 58.45           |
| DJ694;3.3                         | Bg2;2.1,3.3  | 12-Jul-07 | 1.24                                                   | <b>46.36</b>    |
| DJ694;3.3                         | Bg2;2.1,3.3  | 12-Jul-07 | 1.88                                                   | <b>70.26</b>    |
| DJ694;3.3                         | Bg2;2.1,3.3  | 12-Jul-07 | 1.42                                                   | <b>53.08</b>    |
| DJ694;3.3                         | Bg2;2.1,3.3  | 30-Jul-07 | 0.74                                                   | <b>41.27</b>    |
| DJ694;3.3                         | Bg2;2.1,3.3  | 30-Jul-07 | 0.54                                                   | <b>30.00</b>    |
| DJ694;3.3                         | Bg2;2.1,3.3  | 30-Jul-07 | 0.74                                                   | <b>41.70</b>    |
| <b>DJ694 + 2.1 + DJ1077</b>       |              |           |                                                        |                 |
| DJ694                             | Bg2;2.1,1077 | 13-Nov-07 | 0.91                                                   | <b>35.82</b>    |
| DJ694                             | Bg2;2.1,1077 | 13-Nov-07 | 0.42                                                   | <b>16.56</b>    |

| Parents                     |                  | Date      | Specific activity<br>$\Delta$ mOD/min/ $\mu$ g protein | % DJ694 control |
|-----------------------------|------------------|-----------|--------------------------------------------------------|-----------------|
| Male                        | Female           |           |                                                        |                 |
| DJ694                       | Bg2;2.1,1077     | 13-Nov-07 | 0.69                                                   | 27.14           |
| DJ694                       | Bg2;2.1,1077     | 30-Nov-07 | 1.15                                                   | 51.52           |
| DJ694                       | Bg2;2.1,1077     | 30-Nov-07 | 0.49                                                   | 21.82           |
| DJ694                       | Bg2;2.1,1077     | 30-Nov-07 | 1.02                                                   | 45.51           |
| DJ694;2.1,1077              | Bg2              | 22-Feb-08 | 4.32                                                   | 44.47           |
| DJ694;2.1,1077              | Bg2              | 22-Feb-08 | 1.92                                                   | 19.79           |
| DJ694;2.1,1077              | Bg2              | 22-Feb-08 | 7.19                                                   | 74.00           |
| <b>DJ694 + 2.1 + DJ1079</b> |                  |           |                                                        |                 |
| DJ694                       | Bg2;2.1,1079(13) | 13-Nov-07 | 0.29                                                   | 11.36           |
| DJ694                       | Bg2;2.1,1079(13) | 13-Nov-07 | 0.60                                                   | 23.65           |
| DJ694                       | Bg2;2.1,1079(13) | 13-Nov-07 | 0.39                                                   | 15.55           |
| DJ694                       | Bg2;2.1,1079(13) | 30-Nov-07 | 0.15                                                   | 6.54            |
| DJ694                       | Bg2;2.1,1079(13) | 30-Nov-07 | 0.39                                                   | 17.40           |
| DJ694                       | Bg2;2.1,1079(13) | 30-Nov-07 | 0.27                                                   | 11.94           |
| DJ694                       | Bg2;2.1,1079(14) | 13-Nov-07 | 1.62                                                   | 63.93           |
| DJ694                       | Bg2;2.1,1079(14) | 13-Nov-07 | 1.78                                                   | 70.12           |
| DJ694                       | Bg2;2.1,1079(14) | 13-Nov-07 | 1.29                                                   | 50.84           |
| DJ694                       | Bg2;2.1,1079(14) | 30-Nov-07 | 0.78                                                   | 34.84           |
| DJ694                       | Bg2;2.1,1079(14) | 30-Nov-07 | 0.77                                                   | 34.58           |
| DJ694                       | Bg2;2.1,1079(14) | 30-Nov-07 | 1.48                                                   | 66.29           |
| DJ694;2.1,1079(13)          | Bg2              | 22-Feb-08 | 2.27                                                   | 23.42           |
| DJ694;2.1,1079(13)          | Bg2              | 22-Feb-08 | 2.43                                                   | 25.01           |
| DJ694;2.1,1079(13)          | Bg2              | 22-Feb-08 | 2.00                                                   | 20.56           |
| <b>DJ694 + 3.3 + DJ1077</b> |                  |           |                                                        |                 |
| DJ694                       | Bg;3.3,1077      | 13-Nov-07 | 0.28                                                   | 11.13           |
| DJ694                       | Bg;3.3,1077      | 13-Nov-07 | 0.33                                                   | 13.19           |
| DJ694                       | Bg;3.3,1077      | 13-Nov-07 | 0.65                                                   | 25.65           |
| DJ694                       | Bg;3.3,1077      | 30-Nov-07 | 0.59                                                   | 26.50           |
| DJ694                       | Bg;3.3,1077      | 30-Nov-07 | 0.60                                                   | 26.81           |
| DJ694                       | Bg;3.3,1077      | 30-Nov-07 | 0.30                                                   | 13.51           |
| DJ694;3.3,1077              | Bg2              | 22-Feb-08 | 4.13                                                   | 42.57           |
| DJ694;3.3,1077              | Bg2              | 22-Feb-08 | 2.20                                                   | 22.66           |
| DJ694;3.3,1077              | Bg2              | 22-Feb-08 | 5.42                                                   | 55.84           |
| <b>DJ694 + 3.3 + DJ1079</b> |                  |           |                                                        |                 |
| DJ694                       | Bg2;3.3,1079     | 13-Nov-07 | 1.45                                                   | 57.08           |
| DJ694                       | Bg2;3.3,1079     | 13-Nov-07 | 1.81                                                   | 71.46           |
| DJ694                       | Bg2;3.3,1079     | 13-Nov-07 | 1.50                                                   | 59.04           |
| DJ694                       | Bg2;3.3,1079     | 30-Nov-07 | 0.54                                                   | 24.35           |
| DJ694                       | Bg2;3.3,1079     | 30-Nov-07 | 1.47                                                   | 65.65           |

| Parents                              |               | Date      | Specific activity<br>$\Delta$ mOD/min/ $\mu$ g protein | % DJ694 control |
|--------------------------------------|---------------|-----------|--------------------------------------------------------|-----------------|
| Male                                 | Female        |           |                                                        |                 |
| DJ694                                | Bg2;3.3,1079  | 30-Nov-07 | 1.04                                                   | 46.58           |
| <b>DJ694 + 2.1 + DJ1077 + DJ1080</b> |               |           |                                                        |                 |
| DJ694;2.1                            | Bg2;1077+1080 | 03-Aug-07 | 0.30                                                   | <b>10.49</b>    |
| DJ694;2.1                            | Bg2;1077+1080 | 03-Aug-07 | 0.25                                                   | <b>8.75</b>     |
| DJ694;2.1                            | Bg2;1077+1080 | 03-Aug-07 | 0.30                                                   | <b>10.47</b>    |
| DJ694;2.1                            | Bg2;1077+1080 | 15-Aug-07 | 0.27                                                   | 19.65           |
| DJ694;2.1                            | Bg2;1077+1080 | 15-Aug-07 | 0.17                                                   | 12.29           |
| DJ694;2.1                            | Bg2;1077+1080 | 15-Aug-07 | 0.23                                                   | 16.33           |
| DJ694;2.1                            | Bg2;1077+1080 | 12-Jul-07 | 2.03                                                   | <b>75.90</b>    |
| DJ694;2.1                            | Bg2;1077+1080 | 12-Jul-07 | 1.87                                                   | <b>69.80</b>    |
| DJ694;2.1                            | Bg2;1077+1080 | 12-Jul-07 | 1.76                                                   | <b>65.97</b>    |
| DJ694;2.1                            | Bg2;1077+1080 | 30-Jul-07 | 0.24                                                   | <b>13.61</b>    |
| DJ694;2.1                            | Bg2;1077+1080 | 30-Jul-07 | 0.26                                                   | <b>14.33</b>    |
| DJ694;2.1                            | Bg2;1077+1080 | 30-Jul-07 | 0.30                                                   | <b>16.73</b>    |
| <b>DJ694 + 2.1 + DJ1080 + DJ1083</b> |               |           |                                                        |                 |
| DJ694;2.1                            | Bg2;1080,1083 | 03-Aug-07 | 0.76                                                   | <b>26.42</b>    |
| DJ694;2.1                            | Bg2;1080,1083 | 03-Aug-07 | 0.99                                                   | <b>34.61</b>    |
| DJ694;2.1                            | Bg2;1080,1083 | 03-Aug-07 | 0.73                                                   | <b>25.49</b>    |
| DJ694;2.1                            | Bg2;1080,1083 | 15-Aug-07 | 0.29                                                   | 20.55           |
| DJ694;2.1                            | Bg2;1080,1083 | 15-Aug-07 | 0.52                                                   | 37.25           |
| DJ694;2.1                            | Bg2;1080,1083 | 15-Aug-07 | 0.37                                                   | 26.37           |
| DJ694;2.1                            | Bg2;1080,1083 | 12-Jul-07 | 0.68                                                   | <b>25.32</b>    |
| DJ694;2.1                            | Bg2;1080,1083 | 12-Jul-07 | 0.77                                                   | <b>28.92</b>    |
| DJ694;2.1                            | Bg2;1080,1083 | 12-Jul-07 | 0.65                                                   | <b>24.43</b>    |
| DJ694;2.1                            | Bg2;1080,1083 | 30-Jul-07 | 0.77                                                   | <b>43.39</b>    |
| DJ694;2.1                            | Bg2;1080,1083 | 30-Jul-07 | 0.57                                                   | <b>31.83</b>    |
| DJ694;2.1                            | Bg2;1080,1083 | 30-Jul-07 | 0.72                                                   | <b>40.33</b>    |
| <b>DJ694 + 3.3 + DJ1077 + DJ1080</b> |               |           |                                                        |                 |
| DJ694;3.3                            | Bg2;1077+1080 | 03-Aug-07 | 0.31                                                   | <b>10.81</b>    |
| DJ694;3.3                            | Bg2;1077+1080 | 03-Aug-07 | 0.45                                                   | <b>15.64</b>    |
| DJ694;3.3                            | Bg2;1077+1080 | 03-Aug-07 | 0.27                                                   | <b>9.28</b>     |
| DJ694;3.3                            | Bg2;1077+1080 | 15-Aug-07 | 0.33                                                   | 23.40           |
| DJ694;3.3                            | Bg2;1077+1080 | 15-Aug-07 | 0.27                                                   | 19.24           |
| DJ694;3.3                            | Bg2;1077+1080 | 15-Aug-07 | 0.23                                                   | 16.78           |
| DJ694;3.3                            | Bg2;1077+1080 | 12-Jul-07 | 0.31                                                   | <b>11.57</b>    |
| DJ694;3.3                            | Bg2;1077+1080 | 12-Jul-07 | 0.20                                                   | <b>7.50</b>     |
| DJ694;3.3                            | Bg2;1077+1080 | 12-Jul-07 | 0.27                                                   | <b>10.17</b>    |
| DJ694;3.3                            | Bg2;1077+1080 | 30-Jul-07 | 0.33                                                   | <b>18.54</b>    |
| DJ694;3.3                            | Bg2;1077+1080 | 30-Jul-07 | 0.25                                                   | <b>14.02</b>    |



| Parents                              |               | Date      | Specific activity<br>$\Delta$ mOD/min/ $\mu$ g protein | % DJ694 control |
|--------------------------------------|---------------|-----------|--------------------------------------------------------|-----------------|
| Male                                 | Female        |           |                                                        |                 |
| DJ694;3.3                            | Bg2;1077+1080 | 30-Jul-07 | 0.25                                                   | 14.13           |
| <b>DJ694 + 3.3 + DJ1080 + DJ1083</b> |               |           |                                                        |                 |
| DJ694;3.3                            | Bg2;1080,1083 | 03-Aug-07 | 0.40                                                   | 14.11           |
| DJ694;3.3                            | Bg2;1080,1083 | 03-Aug-07 | 0.66                                                   | 23.09           |
| DJ694;3.3                            | Bg2;1080,1083 | 03-Aug-07 | 0.64                                                   | 22.28           |
| DJ694;3.3                            | Bg2;1080,1083 | 15-Aug-07 | 0.48                                                   | 34.31           |
| DJ694;3.3                            | Bg2;1080,1083 | 15-Aug-07 | 0.30                                                   | 21.56           |
| DJ694;3.3                            | Bg2;1080,1083 | 15-Aug-07 | 0.40                                                   | 28.90           |
| DJ694;3.3                            | Bg2;1080,1083 | 12-Jul-07 | 0.41                                                   | 15.28           |
| DJ694;3.3                            | Bg2;1080,1083 | 12-Jul-07 | 0.49                                                   | 18.52           |
| DJ694;3.3                            | Bg2;1080,1083 | 12-Jul-07 | 0.49                                                   | 18.43           |
| DJ694;3.3                            | Bg2;1080,1083 | 30-Jul-07 | 0.52                                                   | 28.91           |
| DJ694;3.3                            | Bg2;1080,1083 | 30-Jul-07 | 0.35                                                   | 19.67           |
| DJ694;3.3                            | Bg2;1080,1083 | 30-Jul-07 | 0.41                                                   | 23.03           |
| <b>DJ694 + 2.1 + 3.3 + DJ1077</b>    |               |           |                                                        |                 |
| DJ694;1077                           | Bg2;2.1,3.3   | 03-Aug-07 | 0.60                                                   | 20.79           |
| DJ694;1077                           | Bg2;2.1,3.3   | 03-Aug-07 | 0.47                                                   | 16.38           |
| DJ694;1077                           | Bg2;2.1,3.3   | 03-Aug-07 | 0.75                                                   | 26.08           |
| DJ694;1077                           | Bg2;2.1,3.3   | 15-Aug-07 | 0.26                                                   | 18.38           |
| DJ694;1077                           | Bg2;2.1,3.3   | 15-Aug-07 | 0.14                                                   | 9.99            |
| DJ694;1077                           | Bg2;2.1,3.3   | 15-Aug-07 | 0.29                                                   | 20.86           |
| DJ694;1077                           | Bg2;2.1,3.3   | 04-Jul-07 | 0.54                                                   | 24.06           |
| DJ694;1077                           | Bg2;2.1,3.3   | 04-Jul-07 | 0.89                                                   | 39.28           |
| DJ694;1077                           | Bg2;2.1,3.3   | 04-Jul-07 | 0.85                                                   | 37.33           |
| DJ694;1077                           | Bg2;2.1,3.3   | 12-Jul-07 | 0.37                                                   | 13.69           |
| DJ694;1077                           | Bg2;2.1,3.3   | 12-Jul-07 | 0.34                                                   | 12.86           |
| DJ694;1077                           | Bg2;2.1,3.3   | 12-Jul-07 | 0.29                                                   | 10.69           |
| DJ694;1077                           | Bg2;2.1,3.3   | 30-Jul-07 | 0.40                                                   | 22.58           |
| DJ694;1077                           | Bg2;2.1,3.3   | 30-Jul-07 | 0.35                                                   | 19.62           |
| DJ694;1077                           | Bg2;2.1,3.3   | 30-Jul-07 | 0.46                                                   | 25.65           |
| <b>DJ694 + 2.1 + 3.3 + DJ1080</b>    |               |           |                                                        |                 |
| DJ694;1080                           | Bg2;2.1,3.3   | 03-Aug-07 | 0.65                                                   | 22.81           |
| DJ694;1080                           | Bg2;2.1,3.3   | 03-Aug-07 | 0.88                                                   | 30.88           |
| DJ694;1080                           | Bg2;2.1,3.3   | 03-Aug-07 | 0.65                                                   | 22.86           |
| DJ694;1080                           | Bg2;2.1,3.3   | 15-Aug-07 | 0.78                                                   | 56.00           |
| DJ694;1080                           | Bg2;2.1,3.3   | 15-Aug-07 | 1.04                                                   | 74.63           |
| DJ694;1080                           | Bg2;2.1,3.3   | 15-Aug-07 | 0.44                                                   | 31.26           |
| DJ694;1080                           | Bg2;2.1,3.3   | 04-Jul-07 | 0.92                                                   | 40.63           |
| DJ694;1080                           | Bg2;2.1,3.3   | 04-Jul-07 | 0.69                                                   | 30.39           |

| <b>Parents</b>                                |                  | <b>Date</b> | <b>Specific activity<br/><math>\Delta</math>mOD/min/<math>\mu</math>g protein</b> | <b>% DJ694 control</b> |
|-----------------------------------------------|------------------|-------------|-----------------------------------------------------------------------------------|------------------------|
| <b>Male</b>                                   | <b>Female</b>    |             |                                                                                   |                        |
| DJ694;1080                                    | Bg2;2.1,3.3      | 04-Jul-07   | 0.67                                                                              | <b>29.47</b>           |
| DJ694;1080                                    | Bg2;2.1,3.3      | 12-Jul-07   | 0.57                                                                              | <b>21.45</b>           |
| DJ694;1080                                    | Bg2;2.1,3.3      | 12-Jul-07   | 0.75                                                                              | <b>27.97</b>           |
| DJ694;1080                                    | Bg2;2.1,3.3      | 12-Jul-07   | 0.98                                                                              | <b>36.62</b>           |
| DJ694;1080                                    | Bg2;2.1,3.3      | 30-Jul-07   | 0.73                                                                              | <b>41.09</b>           |
| DJ694;1080                                    | Bg2;2.1,3.3      | 30-Jul-07   | 0.51                                                                              | <b>28.63</b>           |
| DJ694;1080                                    | Bg2;2.1,3.3      | 30-Jul-07   | 0.58                                                                              | <b>32.60</b>           |
| <b>DJ694 + 2 copies 2.1 + 2 copies DJ1077</b> |                  |             |                                                                                   |                        |
| DJ694;2.1,1077                                | Bg2;2.1,1077     | 13-Nov-07   | 0.16                                                                              | <b>6.50</b>            |
| DJ694;2.1,1077                                | Bg2;2.1,1077     | 13-Nov-07   | 0.13                                                                              | <b>5.12</b>            |
| DJ694;2.1,1077                                | Bg2;2.1,1077     | 13-Nov-07   | 0.16                                                                              | <b>6.42</b>            |
| DJ694;2.1,1077                                | Bg2;2.1,1077     | 30-Nov-07   | 0.17                                                                              | <b>7.41</b>            |
| DJ694;2.1,1077                                | Bg2;2.1,1077     | 30-Nov-07   | 0.17                                                                              | <b>7.47</b>            |
| DJ694;2.1,1077                                | Bg2;2.1,1077     | 30-Nov-07   | 0.35                                                                              | <b>15.50</b>           |
| DJ694;2.1,1077                                | Bg2;2.1,1077     | 19-Dec-07   | 0.35                                                                              | <b>5.94</b>            |
| DJ694;2.1,1077                                | Bg2;2.1,1077     | 19-Dec-07   | 0.29                                                                              | <b>4.87</b>            |
| DJ694;2.1,1077                                | Bg2;2.1,1077     | 19-Dec-07   | 0.39                                                                              | <b>6.65</b>            |
| DJ694;2.1,1077                                | Bg2;2.1,1077     | 19-Dec-07   | 0.72                                                                              | <b>12.19</b>           |
| DJ694;2.1,1077                                | Bg2;2.1,1077     | 19-Dec-07   | 0.90                                                                              | <b>15.34</b>           |
| DJ694;2.1,1077                                | Bg2;2.1,1077     | 19-Dec-07   | 0.95                                                                              | <b>16.20</b>           |
| DJ694;2.1,1077                                | Bg2;2.1,1077     | 10-Feb-08   | 0.17                                                                              | <b>4.30</b>            |
| DJ694;2.1,1077                                | Bg2;2.1,1077     | 10-Feb-08   | 0.11                                                                              | <b>2.82</b>            |
| DJ694;2.1,1077                                | Bg2;2.1,1077     | 10-Feb-08   | 0.13                                                                              | <b>3.17</b>            |
| DJ694;2.1,1077                                | Bg2;2.1,1077     | 22-Feb-08   | 0.53                                                                              | <b>5.41</b>            |
| DJ694;2.1,1077                                | Bg2;2.1,1077     | 22-Feb-08   | 0.39                                                                              | <b>4.07</b>            |
| DJ694;2.1,1077                                | Bg2;2.1,1077     | 22-Feb-08   | 0.34                                                                              | <b>3.55</b>            |
| <b>DJ694 + 2 copies 2.1 + DJ1077 + DJ1079</b> |                  |             |                                                                                   |                        |
| DJ694;2.1,1077                                | Bg2;2.1,1079(13) | 13-Nov-07   | 0.15                                                                              | <b>5.91</b>            |
| DJ694;2.1,1077                                | Bg2;2.1,1079(13) | 13-Nov-07   | 0.16                                                                              | <b>6.48</b>            |
| DJ694;2.1,1077                                | Bg2;2.1,1079(13) | 13-Nov-07   | 0.30                                                                              | <b>11.66</b>           |
| DJ694;2.1,1077                                | Bg2;2.1,1079(13) | 30-Nov-07   | 0.32                                                                              | <b>14.35</b>           |
| DJ694;2.1,1077                                | Bg2;2.1,1079(13) | 30-Nov-07   | 0.17                                                                              | <b>7.77</b>            |
| DJ694;2.1,1077                                | Bg2;2.1,1079(13) | 30-Nov-07   | 0.24                                                                              | <b>10.63</b>           |
| DJ694;2.1,1077                                | Bg2;2.1,1079(13) | 19-Dec-07   | 0.44                                                                              | <b>7.56</b>            |
| DJ694;2.1,1077                                | Bg2;2.1,1079(13) | 19-Dec-07   | 0.50                                                                              | <b>8.56</b>            |
| DJ694;2.1,1077                                | Bg2;2.1,1079(13) | 19-Dec-07   | 0.49                                                                              | <b>8.42</b>            |
| DJ694;2.1,1077                                | Bg2;2.1,1079(14) | 13-Nov-07   | 0.16                                                                              | <b>6.37</b>            |
| DJ694;2.1,1077                                | Bg2;2.1,1079(14) | 13-Nov-07   | 0.31                                                                              | <b>12.42</b>           |
| DJ694;2.1,1077                                | Bg2;2.1,1079(14) | 13-Nov-07   | 0.34                                                                              | <b>13.40</b>           |
| DJ694;2.1,1077                                | Bg2;2.1,1079(14) | 30-Nov-07   | 0.38                                                                              | <b>17.12</b>           |

| Parents                                    |                  | Date      | Specific activity<br>$\Delta$ mOD/min/ $\mu$ g protein | % DJ694 control |
|--------------------------------------------|------------------|-----------|--------------------------------------------------------|-----------------|
| Male                                       | Female           |           |                                                        |                 |
| DJ694;2.1,1077                             | Bg2;2.1,1079(14) | 30-Nov-07 | 0.31                                                   | 13.85           |
| DJ694;2.1,1077                             | Bg2;2.1,1079(14) | 30-Nov-07 | 0.32                                                   | 14.42           |
| DJ694;2.1,1077                             | Bg2;2.1,1079(14) | 19-Dec-07 | 0.65                                                   | 11.09           |
| DJ694;2.1,1077                             | Bg2;2.1,1079(14) | 19-Dec-07 | 0.43                                                   | 7.31            |
| DJ694;2.1,1077                             | Bg2;2.1,1079(14) | 19-Dec-07 | 0.66                                                   | 11.28           |
| DJ694;2.1,1077                             | Bg2;2.1,1079(14) | 19-Dec-07 | 3.71                                                   | 63.27           |
| DJ694;2.1,1077                             | Bg2;2.1,1079(14) | 19-Dec-07 | 1.77                                                   | 30.17           |
| DJ694;2.1,1077                             | Bg2;2.1,1079(14) | 19-Dec-07 | 2.18                                                   | 37.18           |
| DJ694;2.1,1079(13)                         | Bg2;2.1,1077     | 19-Dec-07 | 0.49                                                   | 8.35            |
| DJ694;2.1,1079(13)                         | Bg2;2.1,1077     | 19-Dec-07 | 0.25                                                   | 4.30            |
| DJ694;2.1,1079(13)                         | Bg2;2.1,1077     | 19-Dec-07 | 0.56                                                   | 9.57            |
| DJ694;2.1,1079(14)                         | Bg2;2.1,1077     | 19-Dec-07 | 0.32                                                   | 5.49            |
| DJ694;2.1,1079(14)                         | Bg2;2.1,1077     | 19-Dec-07 | 0.70                                                   | 11.89           |
| DJ694;2.1,1079(14)                         | Bg2;2.1,1077     | 19-Dec-07 | 0.23                                                   | 3.90            |
| DJ694;2.1,1079(14)                         | Bg2;2.1,1077     | 19-Dec-07 | 0.34                                                   | 5.76            |
| DJ694;2.1,1079(14)                         | Bg2;2.1,1077     | 19-Dec-07 | 0.34                                                   | 5.72            |
| DJ694;2.1,1079(14)                         | Bg2;2.1,1077     | 19-Dec-07 | 0.38                                                   | 6.51            |
| DJ694;2.1,1077                             | Bg2;2.1,1079(13) | 10-Feb-08 | 0.13                                                   | 3.15            |
| DJ694;2.1,1077                             | Bg2;2.1,1079(13) | 10-Feb-08 | 0.15                                                   | 3.68            |
| DJ694;2.1,1077                             | Bg2;2.1,1079(13) | 10-Feb-08 | 0.10                                                   | 2.53            |
| DJ694;2.1,1077                             | Bg2;2.1,1079(13) | 22-Feb-08 | 0.83                                                   | 8.59            |
| DJ694;2.1,1077                             | Bg2;2.1,1079(13) | 22-Feb-08 | 0.55                                                   | 5.68            |
| DJ694;2.1,1077                             | Bg2;2.1,1079(13) | 22-Feb-08 | 0.49                                                   | 5.05            |
| DJ694;2.1,1077                             | Bg2;2.1,1079(14) | 10-Feb-08 | 0.17                                                   | 4.28            |
| DJ694;2.1,1077                             | Bg2;2.1,1079(14) | 10-Feb-08 | 0.15                                                   | 3.79            |
| DJ694;2.1,1077                             | Bg2;2.1,1079(14) | 10-Feb-08 | 0.21                                                   | 5.33            |
| DJ694;2.1,1079(13)                         | Bg2;2.1,1077     | 10-Feb-08 | 0.09                                                   | 2.22            |
| DJ694;2.1,1079(13)                         | Bg2;2.1,1077     | 10-Feb-08 | 0.13                                                   | 3.15            |
| DJ694;2.1,1079(13)                         | Bg2;2.1,1077     | 10-Feb-08 | 0.10                                                   | 2.56            |
| DJ694;2.1,1079(13)                         | Bg2;2.1,1077     | 22-Feb-08 | 0.55                                                   | 5.67            |
| DJ694;2.1,1079(13)                         | Bg2;2.1,1077     | 22-Feb-08 | 0.81                                                   | 8.38            |
| DJ694;2.1,1079(13)                         | Bg2;2.1,1077     | 22-Feb-08 | 0.57                                                   | 5.85            |
| DJ694;2.1,1079(14)                         | Bg2;2.1,1077     | 10-Feb-08 | 0.65                                                   | 16.10           |
| DJ694;2.1,1079(14)                         | Bg2;2.1,1077     | 10-Feb-08 | 1.68                                                   | 41.83           |
| DJ694;2.1,1079(14)                         | Bg2;2.1,1077     | 10-Feb-08 | 0.57                                                   | 14.25           |
| <b>DJ694 + 2.1 + 3.3 + 2 copies DJ1077</b> |                  |           |                                                        |                 |
| DJ694;2.1,1077                             | Bg2;3.3,1077     | 13-Nov-07 | 0.15                                                   | 6.01            |
| DJ694;2.1,1077                             | Bg2;3.3,1077     | 13-Nov-07 | 0.15                                                   | 5.76            |
| DJ694;2.1,1077                             | Bg2;3.3,1077     | 13-Nov-07 | 0.18                                                   | 6.93            |
| DJ694;2.1,1077                             | Bg2;3.3,1077     | 30-Nov-07 | 0.17                                                   | 7.42            |

| <b>Parents</b>                             |               | <b>Date</b> | <b>Specific activity<br/><math>\Delta</math>mOD/min/<math>\mu</math>g protein</b> | <b>% DJ694 control</b> |
|--------------------------------------------|---------------|-------------|-----------------------------------------------------------------------------------|------------------------|
| <b>Male</b>                                | <b>Female</b> |             |                                                                                   |                        |
| DJ694;2.1,1077                             | Bg2;3.3,1077  | 30-Nov-07   | 0.33                                                                              | 14.65                  |
| DJ694;2.1,1077                             | Bg2;3.3,1077  | 30-Nov-07   | 0.31                                                                              | 13.79                  |
| DJ694;2.1,1077                             | Bg2;3.3,1077  | 19-Dec-07   | 0.63                                                                              | 10.73                  |
| DJ694;2.1,1077                             | Bg2;3.3,1077  | 19-Dec-07   | 0.65                                                                              | 11.15                  |
| DJ694;2.1,1077                             | Bg2;3.3,1077  | 19-Dec-07   | 0.33                                                                              | 5.57                   |
| DJ694;2.1,1077                             | Bg2;3.3,1077  | 19-Dec-07   | 1.41                                                                              | 24.04                  |
| DJ694;2.1,1077                             | Bg2;3.3,1077  | 19-Dec-07   | 1.00                                                                              | 17.08                  |
| DJ694;2.1,1077                             | Bg2;3.3,1077  | 19-Dec-07   | 1.22                                                                              | 20.77                  |
| DJ694;3.3,1077                             | Bg2;2.1,1077  | 13-Nov-07   | 0.18                                                                              | 6.93                   |
| DJ694;3.3,1077                             | Bg2;2.1,1077  | 13-Nov-07   | 0.29                                                                              | 11.43                  |
| DJ694;3.3,1077                             | Bg2;2.1,1077  | 13-Nov-07   | 0.20                                                                              | 8.04                   |
| DJ694;3.3,1077                             | Bg2;2.1,1077  | 30-Nov-07   | 0.26                                                                              | 11.74                  |
| DJ694;3.3,1077                             | Bg2;2.1,1077  | 30-Nov-07   | 0.11                                                                              | 4.82                   |
| DJ694;3.3,1077                             | Bg2;2.1,1077  | 30-Nov-07   | 0.27                                                                              | 12.12                  |
| DJ694;3.3,1077                             | Bg2;2.1,1077  | 19-Dec-07   | 0.36                                                                              | 6.22                   |
| DJ694;3.3,1077                             | Bg2;2.1,1077  | 19-Dec-07   | 0.44                                                                              | 7.56                   |
| DJ694;3.3,1077                             | Bg2;2.1,1077  | 19-Dec-07   | 0.49                                                                              | 8.38                   |
| DJ694;3.3,1077                             | Bg2;2.1,1077  | 19-Dec-07   | 0.45                                                                              | 7.75                   |
| DJ694;3.3,1077                             | Bg2;2.1,1077  | 19-Dec-07   | 0.61                                                                              | 10.36                  |
| DJ694;3.3,1077                             | Bg2;2.1,1077  | 19-Dec-07   | 0.34                                                                              | 5.73                   |
| DJ694;2.1,1077                             | Bg2;3.3,1077  | 10-Feb-08   | 0.12                                                                              | 3.01                   |
| DJ694;2.1,1077                             | Bg2;3.3,1077  | 10-Feb-08   | 0.14                                                                              | 3.45                   |
| DJ694;2.1,1077                             | Bg2;3.3,1077  | 10-Feb-08   | 0.15                                                                              | 3.78                   |
| DJ694;2.1,1077                             | Bg2;3.3,1077  | 22-Feb-08   | 0.81                                                                              | 8.32                   |
| DJ694;2.1,1077                             | Bg2;3.3,1077  | 22-Feb-08   | 0.90                                                                              | 9.29                   |
| DJ694;2.1,1077                             | Bg2;3.3,1077  | 22-Feb-08   | 0.66                                                                              | 6.81                   |
| DJ694;3.3,1077                             | Bg2;2.1,1077  | 10-Feb-08   | 0.18                                                                              | 4.47                   |
| DJ694;3.3,1077                             | Bg2;2.1,1077  | 10-Feb-08   | 0.18                                                                              | 4.51                   |
| DJ694;3.3,1077                             | Bg2;2.1,1077  | 10-Feb-08   | 0.09                                                                              | 2.30                   |
| DJ694;3.3,1077                             | Bg2;2.1,1077  | 22-Feb-08   | 0.63                                                                              | 6.49                   |
| DJ694;3.3,1077                             | Bg2;2.1,1077  | 22-Feb-08   | 0.49                                                                              | 5.08                   |
| DJ694;3.3,1077                             | Bg2;2.1,1077  | 22-Feb-08   | 0.47                                                                              | 4.87                   |
| <b>DJ694 + 2.1 + 3.3 + DJ1077 + DJ1079</b> |               |             |                                                                                   |                        |
| DJ694;2.1,1077                             | Bg2;3.3,1079  | 13-Nov-07   | 0.32                                                                              | 12.75                  |
| DJ694;2.1,1077                             | Bg2;3.3,1079  | 13-Nov-07   | 0.30                                                                              | 11.70                  |
| DJ694;2.1,1077                             | Bg2;3.3,1079  | 13-Nov-07   | 0.25                                                                              | 9.99                   |
| DJ694;2.1,1077                             | Bg2;3.3,1079  | 30-Nov-07   | 0.21                                                                              | 9.42                   |
| DJ694;2.1,1077                             | Bg2;3.3,1079  | 30-Nov-07   | 0.22                                                                              | 9.94                   |
| DJ694;2.1,1077                             | Bg2;3.3,1079  | 30-Nov-07   | 0.14                                                                              | 6.31                   |
| DJ694;2.1,1077                             | Bg2;3.3,1079  | 19-Dec-07   | 1.38                                                                              | 23.55                  |

| <b>Parents</b>     |                  | <b>Date</b> | <b>Specific activity<br/><math>\Delta</math>mOD/min/<math>\mu</math>g protein</b> | <b>% DJ694 control</b> |
|--------------------|------------------|-------------|-----------------------------------------------------------------------------------|------------------------|
| <b>Male</b>        | <b>Female</b>    |             |                                                                                   |                        |
| DJ694;2.1,1077     | Bg2;3.3,1079     | 19-Dec-07   | 1.10                                                                              | <b>18.73</b>           |
| DJ694;2.1,1077     | Bg2;3.3,1079     | 19-Dec-07   | 0.95                                                                              | <b>16.16</b>           |
| DJ694;2.1,1077     | Bg2;3.3,1079     | 19-Dec-07   | 1.94                                                                              | <b>32.99</b>           |
| DJ694;2.1,1077     | Bg2;3.3,1079     | 19-Dec-07   | 1.62                                                                              | <b>27.59</b>           |
| DJ694;2.1,1077     | Bg2;3.3,1079     | 19-Dec-07   | 1.56                                                                              | <b>26.65</b>           |
| DJ694;2.1,1079(13) | Bg2;3.3,1077     | 19-Dec-07   | 0.58                                                                              | <b>9.85</b>            |
| DJ694;2.1,1079(13) | Bg2;3.3,1077     | 19-Dec-07   | 0.45                                                                              | <b>7.72</b>            |
| DJ694;2.1,1079(13) | Bg2;3.3,1077     | 19-Dec-07   | 0.25                                                                              | <b>4.23</b>            |
| DJ694;2.1,1079(14) | Bg2;3.3,1077     | 19-Dec-07   | 2.28                                                                              | <b>38.93</b>           |
| DJ694;2.1,1079(14) | Bg2;3.3,1077     | 19-Dec-07   | 1.15                                                                              | <b>19.52</b>           |
| DJ694;2.1,1079(14) | Bg2;3.3,1077     | 19-Dec-07   | 1.01                                                                              | <b>17.25</b>           |
| DJ694;2.1,1079(14) | Bg2;3.3,1077     | 19-Dec-07   | 0.83                                                                              | <b>14.10</b>           |
| DJ694;2.1,1079(14) | Bg2;3.3,1077     | 19-Dec-07   | 0.61                                                                              | <b>10.44</b>           |
| DJ694;2.1,1079(14) | Bg2;3.3,1077     | 19-Dec-07   | 0.60                                                                              | <b>10.29</b>           |
| DJ694;3.3,1077     | Bg2;2.1,1079(13) | 13-Nov-07   | 0.39                                                                              | <b>15.35</b>           |
| DJ694;3.3,1077     | Bg2;2.1,1079(13) | 13-Nov-07   | 0.28                                                                              | <b>10.97</b>           |
| DJ694;3.3,1077     | Bg2;2.1,1079(13) | 13-Nov-07   | 0.23                                                                              | <b>8.93</b>            |
| DJ694;3.3,1077     | Bg2;2.1,1079(13) | 30-Nov-07   | 0.39                                                                              | <b>17.36</b>           |
| DJ694;3.3,1077     | Bg2;2.1,1079(13) | 30-Nov-07   | 0.43                                                                              | <b>19.05</b>           |
| DJ694;3.3,1077     | Bg2;2.1,1079(13) | 30-Nov-07   | 0.22                                                                              | <b>9.84</b>            |
| DJ694;3.3,1077     | Bg2;2.1,1079(13) | 19-Dec-07   | 0.35                                                                              | <b>6.03</b>            |
| DJ694;3.3,1077     | Bg2;2.1,1079(13) | 19-Dec-07   | 0.35                                                                              | <b>5.93</b>            |
| DJ694;3.3,1077     | Bg2;2.1,1079(13) | 19-Dec-07   | 0.42                                                                              | <b>7.13</b>            |
| DJ694;3.3,1077     | Bg2;2.1,1079(14) | 13-Nov-07   | 0.23                                                                              | <b>9.10</b>            |
| DJ694;3.3,1077     | Bg2;2.1,1079(14) | 13-Nov-07   | 0.43                                                                              | <b>17.09</b>           |
| DJ694;3.3,1077     | Bg2;2.1,1079(14) | 13-Nov-07   | 0.17                                                                              | <b>6.58</b>            |
| DJ694;3.3,1077     | Bg2;2.1,1079(14) | 30-Nov-07   | 0.20                                                                              | <b>9.00</b>            |
| DJ694;3.3,1077     | Bg2;2.1,1079(14) | 30-Nov-07   | 0.26                                                                              | <b>11.57</b>           |
| DJ694;3.3,1077     | Bg2;2.1,1079(14) | 30-Nov-07   | 0.23                                                                              | <b>10.48</b>           |
| DJ694;3.3,1077     | Bg2;2.1,1079(14) | 19-Dec-07   | 0.43                                                                              | <b>7.29</b>            |
| DJ694;3.3,1077     | Bg2;2.1,1079(14) | 19-Dec-07   | 1.09                                                                              | <b>18.56</b>           |
| DJ694;3.3,1077     | Bg2;2.1,1079(14) | 19-Dec-07   | 1.48                                                                              | <b>25.14</b>           |
| DJ694;3.3,1077     | Bg2;2.1,1079(14) | 19-Dec-07   | 1.76                                                                              | <b>29.98</b>           |
| DJ694;3.3,1077     | Bg2;2.1,1079(14) | 19-Dec-07   | 1.74                                                                              | <b>29.62</b>           |
| DJ694;3.3,1077     | Bg2;2.1,1079(14) | 19-Dec-07   | 2.51                                                                              | <b>42.72</b>           |
| DJ694;1077,1079    | Bg2;2.1,3.3      | 15-Jun-07   | 0.50                                                                              | <b>6.02</b>            |
| DJ694;1077,1079    | Bg2;2.1,3.3      | 15-Jun-07   | 0.55                                                                              | <b>6.56</b>            |
| DJ694;1077,1079    | Bg2;2.1,3.3      | 15-Jun-07   | 0.46                                                                              | <b>5.56</b>            |
| DJ694;1077,1079    | Bg2;2.1,3.3      | 04-Jul-07   | 0.35                                                                              | <b>15.41</b>           |
| DJ694;1077,1079    | Bg2;2.1,3.3      | 04-Jul-07   | 0.28                                                                              | <b>12.40</b>           |

Early pupae

| <b>Parents</b>     |                  | <b>Date</b> | <b>Specific activity<br/><math>\Delta</math>mOD/min/<math>\mu</math>g protein</b> | <b>% DJ694 control</b> |
|--------------------|------------------|-------------|-----------------------------------------------------------------------------------|------------------------|
| <b>Male</b>        | <b>Female</b>    |             |                                                                                   |                        |
| DJ694;1077,1079    | Bg2;2.1,3.3      | 04-Jul-07   | 0.32                                                                              | <b>13.93</b>           |
| DJ694;1077,1079    | Bg2;2.1,3.3      | 15-Jun-07   | 0.95                                                                              | <b>11.42</b>           |
| DJ694;2.1,1077     | Bg2;3.3,1079     | 10-Feb-08   | 0.12                                                                              | <b>2.96</b>            |
| DJ694;2.1,1077     | Bg2;3.3,1079     | 10-Feb-08   | 0.17                                                                              | <b>4.21</b>            |
| DJ694;2.1,1077     | Bg2;3.3,1079     | 10-Feb-08   | 0.21                                                                              | <b>5.09</b>            |
| DJ694;2.1,1079(14) | Bg2;3.3,1077     | 10-Feb-08   | 3.78                                                                              | <b>93.94</b>           |
| DJ694;2.1,1079(14) | Bg2;3.3,1077     | 10-Feb-08   | 0.94                                                                              | <b>23.40</b>           |
| DJ694;2.1,1079(14) | Bg2;3.3,1077     | 10-Feb-08   | 0.87                                                                              | <b>21.63</b>           |
| DJ694;2.1,1079(13) | Bg2;3.3,1077     | 10-Feb-08   | 0.13                                                                              | <b>3.34</b>            |
| DJ694;2.1,1079(13) | Bg2;3.3,1077     | 10-Feb-08   | 0.16                                                                              | <b>3.86</b>            |
| DJ694;2.1,1079(13) | Bg2;3.3,1077     | 10-Feb-08   | 0.11                                                                              | <b>2.78</b>            |
| DJ694;2.1,1079(13) | Bg2;3.3,1077     | 22-Feb-08   | 0.79                                                                              | <b>8.16</b>            |
| DJ694;2.1,1079(13) | Bg2;3.3,1077     | 22-Feb-08   | 1.11                                                                              | <b>11.38</b>           |
| DJ694;2.1,1079(13) | Bg2;3.3,1077     | 22-Feb-08   | 1.02                                                                              | <b>10.45</b>           |
| DJ694;3.3,1077     | Bg2;2.1,1079(13) | 10-Feb-08   | 0.28                                                                              | <b>6.95</b>            |
| DJ694;3.3,1077     | Bg2;2.1,1079(13) | 10-Feb-08   | 0.30                                                                              | <b>7.54</b>            |
| DJ694;3.3,1077     | Bg2;2.1,1079(13) | 10-Feb-08   | 0.28                                                                              | <b>7.01</b>            |
| DJ694;3.3,1077     | Bg2;2.1,1079(13) | 22-Feb-08   | 0.62                                                                              | <b>6.34</b>            |
| DJ694;3.3,1077     | Bg2;2.1,1079(13) | 22-Feb-08   | 0.71                                                                              | <b>7.29</b>            |
| DJ694;3.3,1077     | Bg2;2.1,1079(13) | 22-Feb-08   | 0.63                                                                              | <b>6.49</b>            |
| DJ694;3.3,1077     | Bg2;2.1,1079(14) | 10-Feb-08   | 0.17                                                                              | <b>4.28</b>            |
| DJ694;3.3,1077     | Bg2;2.1,1079(14) | 10-Feb-08   | 0.19                                                                              | <b>4.79</b>            |
| DJ694;3.3,1077     | Bg2;2.1,1079(14) | 10-Feb-08   | 0.28                                                                              | <b>6.86</b>            |

**DJ694 + 2 copies 2.1 + 2 copies DJ1079**

|                    |                  |           |      |              |
|--------------------|------------------|-----------|------|--------------|
| DJ694;2.1,1079(13) | Bg2;2.1,1079(13) | 19-Dec-07 | 0.60 | <b>10.17</b> |
| DJ694;2.1,1079(13) | Bg2;2.1,1079(13) | 19-Dec-07 | 0.32 | <b>5.49</b>  |
| DJ694;2.1,1079(13) | Bg2;2.1,1079(13) | 19-Dec-07 | 0.30 | <b>5.20</b>  |
| DJ694;2.1,1079(13) | Bg2;2.1,1079(14) | 19-Dec-07 | 0.49 | <b>8.31</b>  |
| DJ694;2.1,1079(13) | Bg2;2.1,1079(14) | 19-Dec-07 | 0.27 | <b>4.64</b>  |
| DJ694;2.1,1079(13) | Bg2;2.1,1079(14) | 19-Dec-07 | 0.60 | <b>10.30</b> |
| DJ694;2.1,1079(14) | Bg2;2.1,1079(13) | 19-Dec-07 | 0.21 | <b>3.59</b>  |
| DJ694;2.1,1079(14) | Bg2;2.1,1079(13) | 19-Dec-07 | 0.25 | <b>4.20</b>  |
| DJ694;2.1,1079(14) | Bg2;2.1,1079(13) | 19-Dec-07 | 0.39 | <b>6.62</b>  |
| DJ694;2.1,1079(14) | Bg2;2.1,1079(14) | 19-Dec-07 | 1.62 | <b>27.56</b> |
| DJ694;2.1,1079(14) | Bg2;2.1,1079(14) | 19-Dec-07 | 0.95 | <b>16.11</b> |
| DJ694;2.1,1079(14) | Bg2;2.1,1079(14) | 19-Dec-07 | 1.18 | <b>20.09</b> |
| DJ694;2.1,1079(14) | Bg2;2.1,1079(14) | 19-Dec-07 | 0.86 | <b>14.64</b> |
| DJ694;2.1,1079(14) | Bg2;2.1,1079(14) | 19-Dec-07 | 1.07 | <b>18.15</b> |
| DJ694;2.1,1079(14) | Bg2;2.1,1079(14) | 19-Dec-07 | 0.70 | <b>11.94</b> |
| DJ694;2.1,1079(14) | Bg2;2.1,1079(13) | 10-Feb-08 | 0.75 | <b>18.69</b> |

Early pupae

| <b>Parents</b>                                |                  | <b>Date</b> | <b>Specific activity<br/><math>\Delta</math>mOD/min/<math>\mu</math>g protein</b> | <b>% DJ694 control</b> |
|-----------------------------------------------|------------------|-------------|-----------------------------------------------------------------------------------|------------------------|
| <b>Male</b>                                   | <b>Female</b>    |             |                                                                                   |                        |
| DJ694;2.1,1079(14)                            | Bg2;2.1,1079(13) | 10-Feb-08   | 1.19                                                                              | <b>29.46</b>           |
| DJ694;2.1,1079(14)                            | Bg2;2.1,1079(13) | 10-Feb-08   | 0.58                                                                              | <b>14.45</b>           |
| DJ694;2.1,1079(14)                            | Bg2;2.1,1079(14) | 10-Feb-08   | 1.19                                                                              | <b>29.48</b>           |
| DJ694;2.1,1079(14)                            | Bg2;2.1,1079(14) | 10-Feb-08   | 0.51                                                                              | <b>12.70</b>           |
| DJ694;2.1,1079(14)                            | Bg2;2.1,1079(14) | 10-Feb-08   | 0.71                                                                              | <b>17.65</b>           |
| DJ694;2.1,1079(13)                            | Bg2;2.1,1079(13) | 10-Feb-08   | 0.22                                                                              | <b>5.56</b>            |
| DJ694;2.1,1079(13)                            | Bg2;2.1,1079(13) | 10-Feb-08   | 0.24                                                                              | <b>6.07</b>            |
| DJ694;2.1,1079(13)                            | Bg2;2.1,1079(13) | 10-Feb-08   | 0.26                                                                              | <b>6.58</b>            |
| DJ694;2.1,1079(13)                            | Bg2;2.1,1079(14) | 10-Feb-08   | 0.10                                                                              | <b>2.56</b>            |
| DJ694;2.1,1079(13)                            | Bg2;2.1,1079(14) | 10-Feb-08   | 0.13                                                                              | <b>3.35</b>            |
| DJ694;2.1,1079(13)                            | Bg2;2.1,1079(14) | 10-Feb-08   | 0.18                                                                              | <b>4.47</b>            |
| <b>DJ694 + 2.1 + 3.3 + 2 copies DJ1079</b>    |                  |             |                                                                                   |                        |
| DJ694;2.1,1079(13)                            | Bg2;3.3,1079     | 19-Dec-07   | 0.49                                                                              | <b>8.30</b>            |
| DJ694;2.1,1079(13)                            | Bg2;3.3,1079     | 19-Dec-07   | 0.45                                                                              | <b>7.65</b>            |
| DJ694;2.1,1079(13)                            | Bg2;3.3,1079     | 19-Dec-07   | 0.58                                                                              | <b>9.80</b>            |
| DJ694;2.1,1079(14)                            | Bg2;3.3,1079     | 19-Dec-07   | 1.13                                                                              | <b>19.30</b>           |
| DJ694;2.1,1079(14)                            | Bg2;3.3,1079     | 19-Dec-07   | 1.79                                                                              | <b>30.44</b>           |
| DJ694;2.1,1079(14)                            | Bg2;3.3,1079     | 19-Dec-07   | 1.34                                                                              | <b>22.77</b>           |
| DJ694;2.1,1079(14)                            | Bg2;3.3,1079     | 19-Dec-07   | 0.86                                                                              | <b>14.61</b>           |
| DJ694;2.1,1079(14)                            | Bg2;3.3,1079     | 19-Dec-07   | 0.51                                                                              | <b>8.62</b>            |
| DJ694;2.1,1079(14)                            | Bg2;3.3,1079     | 19-Dec-07   | 1.52                                                                              | <b>25.93</b>           |
| DJ694;2.1,1079(13)                            | Bg2;3.3,1079     | 10-Feb-08   | 0.27                                                                              | <b>6.82</b>            |
| DJ694;2.1,1079(13)                            | Bg2;3.3,1079     | 10-Feb-08   | 0.35                                                                              | <b>8.70</b>            |
| DJ694;2.1,1079(13)                            | Bg2;3.3,1079     | 10-Feb-08   | 0.45                                                                              | <b>11.26</b>           |
| DJ694;2.1,1079(14)                            | Bg2;3.3,1079     | 10-Feb-08   | 2.04                                                                              | <b>50.55</b>           |
| DJ694;2.1,1079(14)                            | Bg2;3.3,1079     | 10-Feb-08   | 2.37                                                                              | <b>58.79</b>           |
| DJ694;2.1,1079(14)                            | Bg2;3.3,1079     | 10-Feb-08   | 2.48                                                                              | <b>61.64</b>           |
| <b>DJ694 + 2 copies 3.3 + 2 copies DJ1077</b> |                  |             |                                                                                   |                        |
| DJ694;3.3,1077                                | Bg2;3.3,1077     | 13-Nov-07   | 0.20                                                                              | <b>8.02</b>            |
| DJ694;3.3,1077                                | Bg2;3.3,1077     | 13-Nov-07   | 0.15                                                                              | <b>5.79</b>            |
| DJ694;3.3,1077                                | Bg2;3.3,1077     | 13-Nov-07   | 0.17                                                                              | <b>6.87</b>            |
| DJ694;3.3,1077                                | Bg2;3.3,1077     | 30-Nov-07   | 0.40                                                                              | <b>17.74</b>           |
| DJ694;3.3,1077                                | Bg2;3.3,1077     | 30-Nov-07   | 0.28                                                                              | <b>12.61</b>           |
| DJ694;3.3,1077                                | Bg2;3.3,1077     | 30-Nov-07   | 0.27                                                                              | <b>11.88</b>           |
| DJ694;3.3,1077                                | Bg2;3.3,1077     | 19-Dec-07   | 0.58                                                                              | <b>9.86</b>            |
| DJ694;3.3,1077                                | Bg2;3.3,1077     | 19-Dec-07   | 0.62                                                                              | <b>10.49</b>           |
| DJ694;3.3,1077                                | Bg2;3.3,1077     | 19-Dec-07   | 0.50                                                                              | <b>8.58</b>            |
| DJ694;3.3,1077                                | Bg2;3.3,1077     | 19-Dec-07   | 0.93                                                                              | <b>15.88</b>           |
| DJ694;3.3,1077                                | Bg2;3.3,1077     | 19-Dec-07   | 0.80                                                                              | <b>13.57</b>           |
| DJ694;3.3,1077                                | Bg2;3.3,1077     | 19-Dec-07   | 0.42                                                                              | <b>7.15</b>            |

Early pupae

| <b>Parents</b>                                |               | <b>Date</b> | <b>Specific activity<br/><math>\Delta</math>mOD/min/<math>\mu</math>g protein</b> | <b>% DJ694 control</b> |
|-----------------------------------------------|---------------|-------------|-----------------------------------------------------------------------------------|------------------------|
| <b>Male</b>                                   | <b>Female</b> |             |                                                                                   |                        |
| DJ694;3.3,1077                                | Bg2;3.3,1077  | 10-Feb-08   | 0.21                                                                              | <b>5.24</b>            |
| DJ694;3.3,1077                                | Bg2;3.3,1077  | 10-Feb-08   | 0.19                                                                              | <b>4.79</b>            |
| DJ694;3.3,1077                                | Bg2;3.3,1077  | 10-Feb-08   | 0.21                                                                              | <b>5.10</b>            |
| DJ694;3.3,1077                                | Bg2;3.3,1077  | 22-Feb-08   | 0.67                                                                              | <b>6.91</b>            |
| DJ694;3.3,1077                                | Bg2;3.3,1077  | 22-Feb-08   | 1.30                                                                              | <b>13.37</b>           |
| DJ694;3.3,1077                                | Bg2;3.3,1077  | 22-Feb-08   | 0.85                                                                              | <b>8.73</b>            |
| <b>DJ694 + 2 copies 3.3 + DJ1077 + DJ1079</b> |               |             |                                                                                   |                        |
| DJ694;3.3,1077                                | Bg2;3.3,1079  | 13-Nov-07   | 0.26                                                                              | <b>10.31</b>           |
| DJ694;3.3,1077                                | Bg2;3.3,1079  | 13-Nov-07   | 0.21                                                                              | <b>8.29</b>            |
| DJ694;3.3,1077                                | Bg2;3.3,1079  | 13-Nov-07   | 0.21                                                                              | <b>8.33</b>            |
| DJ694;3.3,1077                                | Bg2;3.3,1079  | 30-Nov-07   | 0.28                                                                              | <b>12.44</b>           |
| DJ694;3.3,1077                                | Bg2;3.3,1079  | 30-Nov-07   | 0.21                                                                              | <b>9.23</b>            |
| DJ694;3.3,1077                                | Bg2;3.3,1079  | 30-Nov-07   | 0.18                                                                              | <b>8.21</b>            |
| DJ694;3.3,1077                                | Bg2;3.3,1079  | 19-Dec-07   | 1.27                                                                              | <b>21.62</b>           |
| DJ694;3.3,1077                                | Bg2;3.3,1079  | 19-Dec-07   | 0.52                                                                              | <b>8.91</b>            |
| DJ694;3.3,1077                                | Bg2;3.3,1079  | 19-Dec-07   | 0.50                                                                              | <b>8.58</b>            |
| DJ694;3.3,1077                                | Bg2;3.3,1079  | 19-Dec-07   | 0.51                                                                              | <b>8.66</b>            |
| DJ694;3.3,1077                                | Bg2;3.3,1079  | 19-Dec-07   | 0.42                                                                              | <b>7.14</b>            |
| DJ694;3.3,1077                                | Bg2;3.3,1079  | 19-Dec-07   | 0.46                                                                              | <b>7.83</b>            |
| DJ694;3.3,1077                                | Bg2;3.3,1079  | 10-Feb-08   | 0.13                                                                              | <b>3.22</b>            |
| DJ694;3.3,1077                                | Bg2;3.3,1079  | 10-Feb-08   | 0.13                                                                              | <b>3.29</b>            |
| DJ694;3.3,1077                                | Bg2;3.3,1079  | 10-Feb-08   | 0.29                                                                              | <b>7.23</b>            |
| <b>DJ694 + 2.1 + 3.3 + DJ1077 + DJ1080</b>    |               |             |                                                                                   |                        |
| DJ694;2.1,3.3                                 | Bg2;1077,1080 | 31-May-07   | 0.07                                                                              | <b>1.33</b>            |
| DJ694;2.1,3.3                                 | Bg2;1077,1080 | 31-May-07   | 0.06                                                                              | <b>1.16</b>            |
| DJ694;2.1,3.3                                 | Bg2;1077,1080 | 31-May-07   | 0.08                                                                              | <b>1.63</b>            |
| DJ694;2.1,3.3                                 | Bg2;1077,1080 | 31-May-07   | 0.04                                                                              | <b>0.76</b>            |
| DJ694;2.1,3.3                                 | Bg2;1077,1080 | 31-May-07   | 0.41                                                                              | <b>8.28</b>            |
| DJ694;1077,1080                               | Bg2;2.1,3.3   | 15-Jun-07   | 1.73                                                                              | <b>20.69</b>           |
| DJ694;1077,1080                               | Bg2;2.1,3.3   | 15-Jun-07   | 0.86                                                                              | <b>10.30</b>           |
| DJ694;1077,1080                               | Bg2;2.1,3.3   | 04-Jul-07   | 0.15                                                                              | <b>6.57</b>            |
| DJ694;1077,1080                               | Bg2;2.1,3.3   | 04-Jul-07   | 0.67                                                                              | <b>29.71</b>           |
| DJ694;1077,1080                               | Bg2;2.1,3.3   | 04-Jul-07   | 0.52                                                                              | <b>23.16</b>           |
| <b>DJ694 + 2.1 + 3.3 + DJ1080 + DJ1083</b>    |               |             |                                                                                   |                        |
| DJ694;1080,1083                               | Bg2;2.1,3.3   | 31-May-07   | 2.12                                                                              | <b>43.05</b>           |
| DJ694;1080,1083                               | Bg2;2.1,3.3   | 31-May-07   | 2.30                                                                              | <b>46.71</b>           |
| DJ694;1080,1083                               | Bg2;2.1,3.3   | 31-May-07   | 3.38                                                                              | <b>68.52</b>           |
| DJ694;1080,1083                               | Bg2;2.1,3.3   | 31-May-07   | 2.39                                                                              | <b>48.61</b>           |
| DJ694;1080,1083                               | Bg2;2.1,3.3   | 31-May-07   | 0.86                                                                              | <b>17.51</b>           |



| Parents                                       |                  | Date      | Specific activity<br>$\Delta$ mOD/min/ $\mu$ g protein | % DJ694 control |
|-----------------------------------------------|------------------|-----------|--------------------------------------------------------|-----------------|
| Male                                          | Female           |           |                                                        |                 |
| <b>DJ694 + 2.1 + 2 copies DJ1077 + DJ1079</b> |                  |           |                                                        |                 |
| DJ694;1077,1079                               | Bg2;2.1,1077     | 19-Dec-07 | 0.76                                                   | 12.99           |
| DJ694;1077,1079                               | Bg2;2.1,1077     | 19-Dec-07 | 0.43                                                   | 7.32            |
| DJ694;1077,1079                               | Bg2;2.1,1077     | 19-Dec-07 | 0.37                                                   | 6.32            |
| <b>DJ694 + 2.1 + DJ1077 + 2 copies DJ1079</b> |                  |           |                                                        |                 |
| DJ694;1077,1079                               | Bg2;2.1,1079(14) | 19-Dec-07 | 0.65                                                   | 11.03           |
| DJ694;1077,1079                               | Bg2;2.1,1079(14) | 19-Dec-07 | 0.56                                                   | 9.47            |
| DJ694;1077,1079                               | Bg2;2.1,1079(14) | 19-Dec-07 | 0.81                                                   | 13.80           |
| <b>DJ694 + 3.3 + 2 copies DJ1077 + DJ1079</b> |                  |           |                                                        |                 |
| DJ694;1077,1079                               | Bg2;3.3,1077     | 19-Dec-07 | 0.87                                                   | 14.84           |
| DJ694;1077,1079                               | Bg2;3.3,1077     | 19-Dec-07 | 0.71                                                   | 12.13           |
| DJ694;1077,1079                               | Bg2;3.3,1077     | 19-Dec-07 | 0.68                                                   | 11.52           |
| <b>DJ694 + 3.3 + DJ1077 + 2 copies DJ1079</b> |                  |           |                                                        |                 |
| DJ694;1077,1079                               | Bg2;3.3,1079     | 19-Dec-07 | 0.81                                                   | 13.88           |
| DJ694;1077,1079                               | Bg2;3.3,1079     | 19-Dec-07 | 0.87                                                   | 14.84           |
| DJ694;1077,1079                               | Bg2;3.3,1079     | 19-Dec-07 | 0.94                                                   | 15.95           |
| <b>DJ694 + 2.1 + 2 copies DJ1077 + DJ1080</b> |                  |           |                                                        |                 |
| DJ694;1077,1080                               | Bg2;2.1,1077     | 10-Feb-08 | 1.56                                                   | 38.74           |
| DJ694;1077,1080                               | Bg2;2.1,1077     | 10-Feb-08 | 0.57                                                   | 14.20           |
| DJ694;1077,1080                               | Bg2;2.1,1077     | 10-Feb-08 | 1.34                                                   | 33.23           |
| DJ694;2.1,1077                                | Bg2;1077,1080    | 10-Feb-08 | 0.12                                                   | 3.04            |
| DJ694;2.1,1077                                | Bg2;1077,1080    | 10-Feb-08 | 0.10                                                   | 2.38            |
| DJ694;2.1,1077                                | Bg2;1077,1080    | 10-Feb-08 | 0.13                                                   | 3.17            |
| <b>DJ694 + 2.1 + DJ1077 + DJ1079 + DJ1080</b> |                  |           |                                                        |                 |
| DJ694;2.1,1079(13)                            | Bg2;1077,1080    | 10-Feb-08 | 0.30                                                   | 7.34            |
| DJ694;2.1,1079(13)                            | Bg2;1077,1080    | 10-Feb-08 | 0.20                                                   | 5.05            |
| DJ694;1077,1080                               | Bg2;2.1,1079(13) | 10-Feb-08 | 0.33                                                   | 8.27            |
| DJ694;1077,1080                               | Bg2;2.1,1079(13) | 10-Feb-08 | 1.77                                                   | 44.03           |
| DJ694;1077,1080                               | Bg2;2.1,1079(13) | 10-Feb-08 | 1.26                                                   | 31.17           |
| DJ694;1077,1080                               | Bg2;2.1,1079(14) | 10-Feb-08 | 0.62                                                   | 15.49           |
| DJ694;1077,1080                               | Bg2;2.1,1079(14) | 10-Feb-08 | 0.45                                                   | 11.18           |
| DJ694;1077,1080                               | Bg2;2.1,1079(14) | 10-Feb-08 | 1.06                                                   | 26.20           |
| DJ694;2.1,1079(14)                            | Bg2;1077,1080    | 10-Feb-08 | 0.39                                                   | 9.76            |
| DJ694;2.1,1079(14)                            | Bg2;1077,1080    | 10-Feb-08 | 0.32                                                   | 7.87            |
| DJ694;2.1,1079(14)                            | Bg2;1077,1080    | 10-Feb-08 | 1.29                                                   | 32.03           |
| <b>DJ694 + 3.3 + 2 copies DJ1077 + DJ1080</b> |                  |           |                                                        |                 |
| DJ694;1077,1080                               | Bg2;3.3,1077     | 10-Feb-08 | 0.29                                                   | 7.29            |
| DJ694;1077,1080                               | Bg2;3.3,1077     | 10-Feb-08 | 1.09                                                   | 27.10           |
| DJ694;1077,1080                               | Bg2;3.3,1077     | 10-Feb-08 | 0.73                                                   | 18.10           |

Early pupae

| Parents                                       |               | Date      | Specific activity<br>$\Delta$ mOD/min/ $\mu$ g protein | % DJ694 control |
|-----------------------------------------------|---------------|-----------|--------------------------------------------------------|-----------------|
| Male                                          | Female        |           |                                                        |                 |
| DJ694;3.3,1077                                | Bg2;1077,1080 | 10-Feb-08 | 0.20                                                   | 5.02            |
| DJ694;3.3,1077                                | Bg2;1077,1080 | 10-Feb-08 | 0.17                                                   | 4.10            |
| DJ694;3.3,1077                                | Bg2;1077,1080 | 10-Feb-08 | 0.24                                                   | 5.85            |
| <b>DJ694 + 3.3 + DJ1077 + DJ1079 + DJ1080</b> |               |           |                                                        |                 |
| DJ694;1077,1080                               | Bg2;3.3,1079  | 10-Feb-08 | 0.31                                                   | 7.66            |
| DJ694;1077,1080                               | Bg2;3.3,1079  | 10-Feb-08 | 0.70                                                   | 17.45           |
| DJ694;1077,1080                               | Bg2;3.3,1079  | 10-Feb-08 | 0.92                                                   | 22.92           |
| <b>DJ694 + 2.1 + DJ1077 + DJ1080 + DJ1083</b> |               |           |                                                        |                 |
| DJ694;2.1,1077                                | Bg2;1080,1083 | 10-Feb-08 | 0.23                                                   | 5.59            |
| DJ694;2.1,1077                                | Bg2;1080,1083 | 10-Feb-08 | 0.19                                                   | 4.79            |
| DJ694;2.1,1077                                | Bg2;1080,1083 | 10-Feb-08 | 0.18                                                   | 4.35            |
| <b>DJ694 + 2.1 + DJ1079 + DJ1080 + DJ1083</b> |               |           |                                                        |                 |
| DJ694;2.1,1079(13)                            | Bg2;1080,1083 | 10-Feb-08 | 0.18                                                   | 4.55            |
| DJ694;2.1,1079(13)                            | Bg2;1080,1083 | 10-Feb-08 | 0.26                                                   | 6.44            |
| DJ694;2.1,1079(13)                            | Bg2;1080,1083 | 10-Feb-08 | 0.11                                                   | 2.72            |
| DJ694;2.1,1079(14)                            | Bg2;1080,1083 | 10-Feb-08 | 0.46                                                   | 11.47           |
| DJ694;2.1,1079(14)                            | Bg2;1080,1083 | 10-Feb-08 | 0.24                                                   | 5.97            |
| DJ694;2.1,1079(14)                            | Bg2;1080,1083 | 10-Feb-08 | 0.71                                                   | 17.55           |
| <b>DJ694 + 3.3 + DJ1077 + DJ1080 + DJ1083</b> |               |           |                                                        |                 |
| DJ694;3.3,1077                                | Bg2;1080,1083 | 10-Feb-08 | 0.27                                                   | 6.63            |
| DJ694;3.3,1077                                | Bg2;1080,1083 | 10-Feb-08 | 0.22                                                   | 5.50            |
| DJ694;3.3,1077                                | Bg2;1080,1083 | 10-Feb-08 | 0.19                                                   | 4.72            |

*Supplemental Table 7: UAS-lacZ assay LP data set.*

% DJ694 control: specific activity normalized to the positive control, bolded values are significantly different ( $p < 0.05$ ) from the positive control.

Late pupae

| Parents                        |               | Date      | Specific activity                 | % DJ694 control |
|--------------------------------|---------------|-----------|-----------------------------------|-----------------|
| Male                           | Female        |           | $\Delta$ mOD/min/ $\mu$ g protein |                 |
| <b>DJ694 + DJ1077</b>          |               |           |                                   |                 |
| DJ694;1077                     | Bg2           | 15-Jun-07 | 7.50                              | 35.56           |
| DJ694;1077                     | Bg2           | 15-Jun-07 | 7.29                              | 34.56           |
| DJ694;1077                     | Bg2           | 15-Jun-07 | 7.59                              | 35.97           |
| DJ694;1077                     | Bg2           | 04-Jul-07 | 1.60                              | 20.60           |
| DJ694;1077                     | Bg2           | 04-Jul-07 | 2.75                              | 35.48           |
| DJ694;1077                     | Bg2           | 04-Jul-07 | 2.76                              | 35.63           |
| DJ694;1077                     | Bg2           | 31-May-07 | 11.99                             | 27.84           |
| DJ694;1077                     | Bg2           | 31-May-07 | 12.64                             | 29.36           |
| DJ694;1077                     | Bg2           | 31-May-07 | 14.03                             | 32.57           |
| DJ694;1077                     | Bg2           | 31-May-07 | 13.68                             | 31.76           |
| <b>DJ694 + DJ1080</b>          |               |           |                                   |                 |
| DJ694;1080                     | Bg2           | 15-Jun-07 | 11.36                             | 53.82           |
| DJ694;1080                     | Bg2           | 15-Jun-07 | 14.25                             | 67.53           |
| DJ694;1080                     | Bg2           | 15-Jun-07 | 8.38                              | 39.72           |
| DJ694;1080                     | Bg2           | 31-May-07 | 13.44                             | 31.22           |
| DJ694;1080                     | Bg2           | 31-May-07 | 17.07                             | 39.65           |
| DJ694;1080                     | Bg2           | 31-May-07 | 11.27                             | 26.17           |
| DJ694;1080                     | Bg2           | 31-May-07 | 10.37                             | 24.08           |
| DJ694;1080                     | Bg2           | 04-Jul-07 | 3.41                              | 44.00           |
| DJ694;1080                     | Bg2           | 04-Jul-07 | 3.04                              | 39.22           |
| DJ694;1080                     | Bg2           | 04-Jul-07 | 4.80                              | 61.94           |
| <b>DJ694 + DJ1077 + DJ1080</b> |               |           |                                   |                 |
| DJ694                          | Bg2;1077,1080 | 03-Aug-07 | 4.09                              | 17.97           |
| DJ694                          | Bg2;1077,1080 | 03-Aug-07 | 2.56                              | 11.26           |
| DJ694                          | Bg2;1077,1080 | 15-Aug-07 | 1.29                              | 35.36           |
| DJ694                          | Bg2;1077,1080 | 15-Aug-07 | 0.74                              | 20.20           |
| DJ694                          | Bg2;1077,1080 | 15-Aug-07 | 0.89                              | 24.37           |
| DJ694                          | Bg2;1077,1080 | 30-Jul-07 | 3.53                              | 28.96           |
| DJ694                          | Bg2;1077,1080 | 30-Jul-07 | 3.47                              | 28.46           |
| DJ694                          | Bg2;1077,1080 | 30-Jul-07 | 3.76                              | 30.82           |
| <b>DJ694 + DJ1080 + DJ1083</b> |               |           |                                   |                 |
| DJ694                          | Bg2;1080,1083 | 15-Jun-07 | 12.38                             | 58.69           |
| DJ694                          | Bg2;1080,1083 | 15-Jun-07 | 13.00                             | 61.59           |
| DJ694                          | Bg2;1080,1083 | 15-Jun-07 | 13.40                             | 63.52           |
| DJ694                          | Bg2;1080,1083 | 04-Jul-07 | 3.98                              | 51.41           |
| DJ694                          | Bg2;1080,1083 | 04-Jul-07 | 4.22                              | 54.52           |
| DJ694                          | Bg2;1080,1083 | 04-Jul-07 | 4.05                              | 52.28           |
| DJ694                          | Bg2;1080,1083 | 12-Jul-07 | 7.42                              | 71.27           |

Late pupae

| Parents                                 |               | Date      | Specific activity<br>$\Delta$ mOD/min/ $\mu$ g protein | % DJ694 control |
|-----------------------------------------|---------------|-----------|--------------------------------------------------------|-----------------|
| Male                                    | Female        |           |                                                        |                 |
| DJ694                                   | Bg2;1080,1083 | 12-Jul-07 | 6.13                                                   | 58.88           |
| DJ694                                   | Bg2;1080,1083 | 12-Jul-07 | 6.09                                                   | 58.49           |
| <b>DJ694 + DJ1077 + DJ1079</b>          |               |           |                                                        |                 |
| DJ694;1077,1079                         | Bg2           | 15-Aug-07 | 1.60                                                   | 43.82           |
| DJ694;1077,1079                         | Bg2           | 15-Aug-07 | 1.75                                                   | 47.97           |
| DJ694;1077,1079                         | Bg2           | 15-Aug-07 | 1.37                                                   | 37.66           |
| DJ694;1077,1079                         | Bg2           | 15-Jun-07 | 8.18                                                   | 38.75           |
| DJ694;1077,1079                         | Bg2           | 15-Jun-07 | 11.98                                                  | 56.76           |
| DJ694;1077,1079                         | Bg2           | 15-Jun-07 | 7.07                                                   | 33.51           |
| DJ694;1077,1079                         | Bg2           | 04-Jul-07 | 3.37                                                   | 43.50           |
| DJ694;1077,1079                         | Bg2           | 04-Jul-07 | 3.74                                                   | 48.29           |
| DJ694;1077,1079                         | Bg2           | 04-Jul-07 | 3.33                                                   | 42.94           |
| <b>DJ694 + DJ1077 + DJ1080</b>          |               |           |                                                        |                 |
| DJ694;1077,1080                         | Bg2           | 15-Jun-07 | 9.72                                                   | 46.08           |
| DJ694;1077,1080                         | Bg2           | 15-Jun-07 | 9.98                                                   | 47.32           |
| DJ694;1077,1080                         | Bg2           | 15-Jun-07 | 13.69                                                  | 64.88           |
| DJ694;1077,1080                         | Bg2           | 04-Jul-07 | 2.88                                                   | 37.23           |
| DJ694;1077,1080                         | Bg2           | 04-Jul-07 | 3.29                                                   | 42.47           |
| DJ694;1077,1080                         | Bg2           | 04-Jul-07 | 3.53                                                   | 45.54           |
| <b>DJ694 + 2 copies DJ1077 + DJ1080</b> |               |           |                                                        |                 |
| DJ694;1077                              | Bg2;1077,1080 | 03-Aug-07 | 4.83                                                   | 21.22           |
| DJ694;1077                              | Bg2;1077,1080 | 03-Aug-07 | 4.67                                                   | 20.53           |
| DJ694;1077                              | Bg2;1077,1080 | 03-Aug-07 | 4.59                                                   | 20.17           |
| DJ694;1077                              | Bg2;1077,1080 | 15-Aug-07 | 0.34                                                   | 9.25            |
| DJ694;1077                              | Bg2;1077,1080 | 15-Aug-07 | 0.87                                                   | 23.91           |
| DJ694;1077                              | Bg2;1077,1080 | 15-Aug-07 | 0.18                                                   | 5.02            |
| DJ694;1077                              | Bg2;1077,1080 | 12-Jul-07 | 3.15                                                   | 30.23           |
| DJ694;1077                              | Bg2;1077,1080 | 12-Jul-07 | 3.03                                                   | 29.10           |
| DJ694;1077                              | Bg2;1077,1080 | 12-Jul-07 | 3.48                                                   | 33.39           |
| DJ694;1077                              | Bg2;1077,1080 | 30-Jul-07 | 2.58                                                   | 21.12           |
| DJ694;1077                              | Bg2;1077,1080 | 30-Jul-07 | 2.32                                                   | 18.98           |
| DJ694;1077                              | Bg2;1077,1080 | 30-Jul-07 | 2.50                                                   | 20.46           |
| <b>DJ694 + DJ1077 + DJ0180 + DJ1083</b> |               |           |                                                        |                 |
| DJ694;1077                              | Bg2;1080,1083 | 03-Aug-07 | 4.55                                                   | 19.99           |
| DJ694;1077                              | Bg2;1080,1083 | 03-Aug-07 | 4.84                                                   | 21.25           |
| DJ694;1077                              | Bg2;1080,1083 | 03-Aug-07 | 3.38                                                   | 14.86           |
| DJ694;1077                              | Bg2;1080,1083 | 15-Aug-07 | 0.94                                                   | 25.73           |
| DJ694;1077                              | Bg2;1080,1083 | 15-Aug-07 | 1.23                                                   | 33.76           |
| DJ694;1077                              | Bg2;1080,1083 | 15-Aug-07 | 1.01                                                   | 27.67           |

Late pupae

| Parents                                          |               | Date      | Specific activity<br>$\Delta$ mOD/min/ $\mu$ g protein | % DJ694 control |
|--------------------------------------------------|---------------|-----------|--------------------------------------------------------|-----------------|
| Male                                             | Female        |           |                                                        |                 |
| DJ694;1077                                       | Bg2;1080,1083 | 30-Jul-07 | 3.80                                                   | 31.13           |
| DJ694;1077                                       | Bg2;1080,1083 | 30-Jul-07 | 3.30                                                   | 27.02           |
| DJ694;1077                                       | Bg2;1080,1083 | 30-Jul-07 | 3.51                                                   | 28.76           |
| <b>DJ694 + DJ1077 + 2 copies DJ1080</b>          |               |           |                                                        |                 |
| DJ694;1080                                       | Bg2;1077,1080 | 03-Aug-07 | 5.37                                                   | 23.59           |
| DJ694;1080                                       | Bg2;1077,1080 | 03-Aug-07 | 3.94                                                   | 17.30           |
| DJ694;1080                                       | Bg2;1077,1080 | 03-Aug-07 | 4.10                                                   | 18.04           |
| DJ694;1080                                       | Bg2;1077,1080 | 15-Aug-07 | 0.82                                                   | 22.44           |
| DJ694;1080                                       | Bg2;1077,1080 | 15-Aug-07 | 0.88                                                   | 24.01           |
| DJ694;1080                                       | Bg2;1077,1080 | 15-Aug-07 | 0.91                                                   | 24.95           |
| DJ694;1080                                       | Bg2;1077,1080 | 12-Jul-07 | 3.40                                                   | 32.68           |
| DJ694;1080                                       | Bg2;1077,1080 | 12-Jul-07 | 3.13                                                   | 30.11           |
| DJ694;1080                                       | Bg2;1077,1080 | 12-Jul-07 | 3.28                                                   | 31.48           |
| DJ694;1080                                       | Bg2;1077,1080 | 30-Jul-07 | 2.37                                                   | 19.44           |
| DJ694;1080                                       | Bg2;1077,1080 | 30-Jul-07 | 2.65                                                   | 21.70           |
| DJ694;1080                                       | Bg2;1077,1080 | 30-Jul-07 | 3.28                                                   | 26.87           |
| <b>DJ694 + 2 copies DJ1080 + DJ1083</b>          |               |           |                                                        |                 |
| DJ694;1080                                       | Bg2;1080,1083 | 03-Aug-07 | 2.86                                                   | 12.58           |
| DJ694;1080                                       | Bg2;1080,1083 | 03-Aug-07 | 3.97                                                   | 17.43           |
| DJ694;1080                                       | Bg2;1080,1083 | 03-Aug-07 | 3.37                                                   | 14.81           |
| DJ694;1080                                       | Bg2;1080,1083 | 15-Aug-07 | 1.35                                                   | 36.93           |
| DJ694;1080                                       | Bg2;1080,1083 | 15-Aug-07 | 0.99                                                   | 27.23           |
| DJ694;1080                                       | Bg2;1080,1083 | 15-Aug-07 | 1.11                                                   | 30.42           |
| DJ694;1080                                       | Bg2;1080,1083 | 30-Jul-07 | 3.77                                                   | 30.91           |
| DJ694;1080                                       | Bg2;1080,1083 | 30-Jul-07 | 3.98                                                   | 32.64           |
| DJ694;1080                                       | Bg2;1080,1083 | 30-Jul-07 | 4.19                                                   | 34.34           |
| <b>DJ694 + 2 copies DJ1077 + DJ1079 + DJ1080</b> |               |           |                                                        |                 |
| DJ694;1077,1079                                  | Bg2;1077,1080 | 15-Jun-07 | 5.95                                                   | 28.19           |
| DJ694;1077,1079                                  | Bg2;1077,1080 | 15-Jun-07 | 7.33                                                   | 34.72           |
| DJ694;1077,1079                                  | Bg2;1077,1080 | 15-Jun-07 | 5.76                                                   | 27.29           |
| DJ694;1077,1079                                  | Bg2;1077,1080 | 04-Jul-07 | 1.98                                                   | 25.53           |
| DJ694;1077,1079                                  | Bg2;1077,1080 | 04-Jul-07 | 2.71                                                   | 34.98           |
| DJ694;1077,1079                                  | Bg2;1077,1080 | 04-Jul-07 | 2.15                                                   | 27.76           |
| <b>DJ694 + DJ1077 + DJ1079 + DJ1080 + DJ1083</b> |               |           |                                                        |                 |
| DJ694;1077,1079                                  | Bg2;1080,1083 | 04-Jul-07 | 2.47                                                   | 31.84           |
| DJ694;1077,1079                                  | Bg2;1080,1083 | 04-Jul-07 | 2.52                                                   | 32.57           |
| DJ694;1077,1079                                  | Bg2;1080,1083 | 04-Jul-07 | 1.94                                                   | 25.03           |
| DJ694;1077,1079                                  | Bg2;1080,1083 | 12-Jul-07 | 3.96                                                   | 38.05           |
| DJ694;1077,1079                                  | Bg2;1080,1083 | 12-Jul-07 | 3.68                                                   | 35.32           |

Late pupae

| Parents                                          |               | Date      | Specific activity<br>$\Delta$ mOD/min/ $\mu$ g protein | % DJ694 control |
|--------------------------------------------------|---------------|-----------|--------------------------------------------------------|-----------------|
| Male                                             | Female        |           |                                                        |                 |
| DJ694;1077,1079                                  | Bg2;1080,1083 | 12-Jul-07 | 3.89                                                   | 37.36           |
| <b>DJ694 + 2 copies DJ1077 + 2 copies DJ1080</b> |               |           |                                                        |                 |
| DJ694;1077,1080                                  | Bg2;1077,1080 | 15-Jun-07 | 6.99                                                   | 33.12           |
| DJ694;1077,1080                                  | Bg2;1077,1080 | 15-Jun-07 | 6.74                                                   | 31.96           |
| DJ694;1077,1080                                  | Bg2;1077,1080 | 15-Jun-07 | 7.44                                                   | 35.27           |
| DJ694;1077,1080                                  | Bg2;1077,1080 | 31-May-07 | 9.03                                                   | 20.96           |
| DJ694;1077,1080                                  | Bg2;1077,1080 | 31-May-07 | 8.56                                                   | 19.87           |
| DJ694;1077,1080                                  | Bg2;1077,1080 | 31-May-07 | 7.31                                                   | 16.98           |
| DJ694;1077,1080                                  | Bg2;1077,1080 | 31-May-07 | 9.07                                                   | 21.07           |
| DJ694;1077,1080                                  | Bg2;1077,1080 | 10-Feb-08 | 19.30                                                  | 66.52           |
| DJ694;1077,1080                                  | Bg2;1077,1080 | 10-Feb-08 | 4.35                                                   | 15.01           |
| DJ694;1077,1080                                  | Bg2;1077,1080 | 10-Feb-08 | 7.17                                                   | 24.70           |
| DJ694;1077,1080                                  | Bg2;1077,1080 | 04-Jul-07 | 2.84                                                   | 36.68           |
| DJ694;1077,1080                                  | Bg2;1077,1080 | 04-Jul-07 | 3.07                                                   | 39.67           |
| DJ694;1077,1080                                  | Bg2;1077,1080 | 04-Jul-07 | 2.65                                                   | 34.16           |
| <b>DJ694 + 2.1</b>                               |               |           |                                                        |                 |
| DJ694;2.1                                        | Bg2           | 15-Jun-07 | 10.46                                                  | 49.55           |
| DJ694;2.1                                        | Bg2           | 15-Jun-07 | 10.10                                                  | 47.86           |
| DJ694;2.1                                        | Bg2           | 15-Jun-07 | 10.96                                                  | 51.93           |
| DJ694;2.1                                        | Bg2           | 31-May-07 | 12.47                                                  | 28.96           |
| DJ694;2.1                                        | Bg2           | 31-May-07 | 17.19                                                  | 39.92           |
| DJ694;2.1                                        | Bg2           | 31-May-07 | 16.86                                                  | 39.16           |
| DJ694;2.1                                        | Bg2           | 31-May-07 | 14.92                                                  | 34.66           |
| DJ694;2.1                                        | Bg2           | 04-Jul-07 | 4.22                                                   | 54.46           |
| DJ694;2.1                                        | Bg2           | 04-Jul-07 | 3.85                                                   | 49.70           |
| DJ694;2.1                                        | Bg2           | 04-Jul-07 | 4.85                                                   | 62.59           |
| <b>DJ694 + 3.3</b>                               |               |           |                                                        |                 |
| DJ694;3.3                                        | Bg2           | 15-Jun-07 | 8.78                                                   | 41.60           |
| DJ694;3.3                                        | Bg2           | 15-Jun-07 | 9.96                                                   | 47.19           |
| DJ694;3.3                                        | Bg2           | 15-Jun-07 | 9.15                                                   | 43.36           |
| DJ694;3.3                                        | Bg2           | 31-May-07 | 9.98                                                   | 23.18           |
| DJ694;3.3                                        | Bg2           | 31-May-07 | 10.88                                                  | 25.27           |
| DJ694;3.3                                        | Bg2           | 31-May-07 | 11.86                                                  | 27.54           |
| DJ694;3.3                                        | Bg2           | 31-May-07 | 9.88                                                   | 22.95           |
| DJ694;3.3                                        | Bg2           | 04-Jul-07 | 3.65                                                   | 47.12           |
| DJ694;3.3                                        | Bg2           | 04-Jul-07 | 2.87                                                   | 37.01           |
| DJ694;3.3                                        | Bg2           | 04-Jul-07 | 3.19                                                   | 41.15           |
| <b>DJ694 + 2.1 + 3.3</b>                         |               |           |                                                        |                 |
| DJ694                                            | Bg2;2.1,3.3   | 04-Jul-07 | 3.74                                                   | 48.24           |

Late pupae

| Parents                           |                  | Date      | Specific activity<br>$\Delta$ mOD/min/ $\mu$ g protein | % DJ694 control |
|-----------------------------------|------------------|-----------|--------------------------------------------------------|-----------------|
| Male                              | Female           |           |                                                        |                 |
| DJ694                             | Bg2;2.1,3.3      | 04-Jul-07 | 3.60                                                   | 46.44           |
| DJ694                             | Bg2;2.1,3.3      | 04-Jul-07 | 4.20                                                   | 54.26           |
| DJ694                             | Bg2;2.1,3.3      | 12-Jul-07 | 4.99                                                   | 47.93           |
| DJ694                             | Bg2;2.1,3.3      | 12-Jul-07 | 4.18                                                   | 40.12           |
| DJ694                             | Bg2;2.1,3.3      | 12-Jul-07 | 5.63                                                   | 54.12           |
| <b>DJ694 + 2 copies 2.1 + 3.3</b> |                  |           |                                                        |                 |
| DJ694;2,1                         | Bg2;2.1,3.3      | 03-Aug-07 | 3.01                                                   | 13.22           |
| DJ694;2,1                         | Bg2;2.1,3.3      | 03-Aug-07 | 4.88                                                   | 21.46           |
| DJ694;2,1                         | Bg2;2.1,3.3      | 03-Aug-07 | 5.45                                                   | 23.98           |
| DJ694;2,1                         | Bg2;2.1,3.3      | 15-Aug-07 | 1.29                                                   | 35.34           |
| DJ694;2,1                         | Bg2;2.1,3.3      | 15-Aug-07 | 0.98                                                   | 26.75           |
| DJ694;2,1                         | Bg2;2.1,3.3      | 15-Aug-07 | 1.22                                                   | 33.39           |
| DJ694;2,1                         | Bg2;2.1,3.3      | 12-Jul-07 | 2.18                                                   | 20.90           |
| DJ694;2,1                         | Bg2;2.1,3.3      | 12-Jul-07 | 3.56                                                   | 34.23           |
| DJ694;2,1                         | Bg2;2.1,3.3      | 12-Jul-07 | 2.67                                                   | 25.62           |
| <b>DJ694 + 2.1 + 2 copies 3.3</b> |                  |           |                                                        |                 |
| DJ694;3.3                         | Bg2;2.1,3.3      | 03-Aug-07 | 3.46                                                   | 15.21           |
| DJ694;3.3                         | Bg2;2.1,3.3      | 15-Aug-07 | 1.32                                                   | 36.24           |
| DJ694;3.3                         | Bg2;2.1,3.3      | 15-Aug-07 | 1.35                                                   | 37.07           |
| DJ694;3.3                         | Bg2;2.1,3.3      | 15-Aug-07 | 1.36                                                   | 37.21           |
| DJ694;3.3                         | Bg2;2.1,3.3      | 12-Jul-07 | 2.24                                                   | 21.54           |
| DJ694;3.3                         | Bg2;2.1,3.3      | 12-Jul-07 | 2.18                                                   | 20.97           |
| DJ694;3.3                         | Bg2;2.1,3.3      | 12-Jul-07 | 3.25                                                   | 31.21           |
| DJ694;3.3                         | Bg2;2.1,3.3      | 30-Jul-07 | 1.44                                                   | 11.81           |
| DJ694;3.3                         | Bg2;2.1,3.3      | 30-Jul-07 | 1.67                                                   | 13.70           |
| <b>DJ694 + 2.1 + DJ1077</b>       |                  |           |                                                        |                 |
| DJ694                             | Bg2;2.1,1077     | 13-Nov-07 | 1.79                                                   | 22.65           |
| DJ694                             | Bg2;2.1,1077     | 13-Nov-07 | 1.62                                                   | 20.48           |
| DJ694                             | Bg2;2.1,1077     | 13-Nov-07 | 1.62                                                   | 20.42           |
| DJ694                             | Bg2;2.1,1077     | 30-Nov-07 | 1.93                                                   | 19.10           |
| DJ694                             | Bg2;2.1,1077     | 30-Nov-07 | 2.64                                                   | 26.14           |
| DJ694                             | Bg2;2.1,1077     | 30-Nov-07 | 3.12                                                   | 30.90           |
| DJ694;2.1,1077                    | Bg2              | 22-Feb-08 | 1.79                                                   | 9.47            |
| DJ694;2.1,1077                    | Bg2              | 22-Feb-08 | 1.66                                                   | 8.78            |
| DJ694;2.1,1077                    | Bg2              | 22-Feb-08 | 2.02                                                   | 10.69           |
| <b>DJ694 + 2.1 + DJ1079</b>       |                  |           |                                                        |                 |
| DJ694                             | Bg2;2.1,1079(13) | 13-Nov-07 | 0.90                                                   | 11.37           |
| DJ694                             | Bg2;2.1,1079(13) | 13-Nov-07 | 0.77                                                   | 9.76            |
| DJ694                             | Bg2;2.1,1079(13) | 13-Nov-07 | 0.94                                                   | 11.82           |



Late pupae

| Parents                              |                  | Date      | Specific activity<br>$\Delta$ mOD/min/ $\mu$ g protein | % DJ694 control |
|--------------------------------------|------------------|-----------|--------------------------------------------------------|-----------------|
| Male                                 | Female           |           |                                                        |                 |
| DJ694                                | Bg2;2.1,1079(13) | 30-Nov-07 | 0.77                                                   | 7.64            |
| DJ694                                | Bg2;2.1,1079(13) | 30-Nov-07 | 2.04                                                   | 20.19           |
| DJ694                                | Bg2;2.1,1079(13) | 30-Nov-07 | 1.88                                                   | 18.58           |
| DJ694                                | Bg2;2.1,1079(14) | 13-Nov-07 | 3.33                                                   | 42.06           |
| DJ694                                | Bg2;2.1,1079(14) | 13-Nov-07 | 3.47                                                   | 43.76           |
| DJ694                                | Bg2;2.1,1079(14) | 13-Nov-07 | 3.19                                                   | 40.32           |
| DJ694                                | Bg2;2.1,1079(14) | 30-Nov-07 | 4.26                                                   | 42.12           |
| DJ694                                | Bg2;2.1,1079(14) | 30-Nov-07 | 0.84                                                   | 8.35            |
| DJ694                                | Bg2;2.1,1079(14) | 30-Nov-07 | 3.29                                                   | 32.57           |
| DJ694;2.1,1079(13)                   | Bg2              | 22-Feb-08 | 1.34                                                   | 7.06            |
| DJ694;2.1,1079(13)                   | Bg2              | 22-Feb-08 | 0.96                                                   | 5.06            |
| DJ694;2.1,1079(13)                   | Bg2              | 22-Feb-08 | 1.58                                                   | 8.35            |
| <b>DJ694 + 3.3 + DJ1077</b>          |                  |           |                                                        |                 |
| DJ694                                | Bg2;3.3,1077     | 13-Nov-07 | 2.21                                                   | 27.86           |
| DJ694                                | Bg2;3.3,1077     | 13-Nov-07 | 1.96                                                   | 24.78           |
| DJ694                                | Bg2;3.3,1077     | 13-Nov-07 | 1.79                                                   | 22.56           |
| DJ694                                | Bg2;3.3,1077     | 30-Nov-07 | 1.44                                                   | 14.25           |
| DJ694                                | Bg2;3.3,1077     | 30-Nov-07 | 1.94                                                   | 19.16           |
| DJ694                                | Bg2;3.3,1077     | 30-Nov-07 | 1.08                                                   | 10.64           |
| DJ694;3.3,1077                       | Bg2              | 22-Feb-08 | 1.84                                                   | 9.70            |
| DJ694;3.3,1077                       | Bg2              | 22-Feb-08 | 1.45                                                   | 7.68            |
| DJ694;3.3,1077                       | Bg2              | 22-Feb-08 | 4.17                                                   | 22.04           |
| <b>DJ694 + 3.3 + DJ1079</b>          |                  |           |                                                        |                 |
| DJ694                                | Bg2;3.3,1079     | 13-Nov-07 | 3.08                                                   | 38.84           |
| DJ694                                | Bg2;3.3,1079     | 13-Nov-07 | 3.93                                                   | 49.63           |
| DJ694                                | Bg2;3.3,1079     | 13-Nov-07 | 4.29                                                   | 54.12           |
| DJ694                                | Bg2;3.3,1079     | 30-Nov-07 | 3.89                                                   | 38.48           |
| DJ694                                | Bg2;3.3,1079     | 30-Nov-07 | 3.92                                                   | 38.75           |
| DJ694                                | Bg2;3.3,1079     | 30-Nov-07 | 4.40                                                   | 43.49           |
| <b>DJ694 + 2.1 + DJ1077 + DJ1080</b> |                  |           |                                                        |                 |
| DJ694;2.1                            | Bg2;1077,1080    | 03-Aug-07 | 1.70                                                   | 7.49            |
| DJ694;2.1                            | Bg2;1077,1080    | 03-Aug-07 | 2.44                                                   | 10.74           |
| DJ694;2.1                            | Bg2;1077,1080    | 03-Aug-07 | 2.07                                                   | 9.11            |
| DJ694;2.1                            | Bg2;1077,1080    | 15-Aug-07 | 0.38                                                   | 10.30           |
| DJ694;2.1                            | Bg2;1077,1080    | 15-Aug-07 | 0.32                                                   | 8.81            |
| DJ694;2.1                            | Bg2;1077,1080    | 15-Aug-07 | 0.37                                                   | 10.26           |
| DJ694;2.1                            | Bg2;1077,1080    | 12-Jul-07 | 2.74                                                   | 26.35           |
| DJ694;2.1                            | Bg2;1077,1080    | 12-Jul-07 | 3.80                                                   | 36.53           |
| DJ694;2.1                            | Bg2;1077,1080    | 12-Jul-07 | 3.03                                                   | 29.14           |

Late pupae

| Parents                              |               | Date      | Specific activity<br>$\Delta$ mOD/min/ $\mu$ g protein | % DJ694 control |
|--------------------------------------|---------------|-----------|--------------------------------------------------------|-----------------|
| Male                                 | Female        |           |                                                        |                 |
| DJ694;2.1                            | Bg2;1077,1080 | 30-Jul-07 | 0.85                                                   | 6.94            |
| DJ694;2.1                            | Bg2;1077,1080 | 30-Jul-07 | 1.73                                                   | 14.17           |
| DJ694;2.1                            | Bg2;1077,1080 | 30-Jul-07 | 0.99                                                   | 8.12            |
| <b>DJ694 + 2.1 + DJ1080 + DJ1083</b> |               |           |                                                        |                 |
| DJ694;2.1                            | Bg2;1080,1083 | 03-Aug-07 | 1.73                                                   | 7.62            |
| DJ694;2.1                            | Bg2;1080,1083 | 03-Aug-07 | 3.09                                                   | 13.58           |
| DJ694;2.1                            | Bg2;1080,1083 | 03-Aug-07 | 4.67                                                   | 20.53           |
| DJ694;2.1                            | Bg2;1080,1083 | 15-Aug-07 | 0.64                                                   | 17.53           |
| DJ694;2.1                            | Bg2;1080,1083 | 15-Aug-07 | 0.51                                                   | 13.84           |
| DJ694;2.1                            | Bg2;1080,1083 | 15-Aug-07 | 0.78                                                   | 21.38           |
| DJ694;2.1                            | Bg2;1080,1083 | 12-Jul-07 | 1.87                                                   | 17.93           |
| DJ694;2.1                            | Bg2;1080,1083 | 12-Jul-07 | 1.74                                                   | 16.75           |
| DJ694;2.1                            | Bg2;1080,1083 | 12-Jul-07 | 2.04                                                   | 19.58           |
| DJ694;2.1                            | Bg2;1080,1083 | 30-Jul-07 | 2.36                                                   | 19.31           |
| DJ694;2.1                            | Bg2;1080,1083 | 30-Jul-07 | 2.22                                                   | 18.18           |
| DJ694;2.1                            | Bg2;1080,1083 | 30-Jul-07 | 2.42                                                   | 19.84           |
| <b>DJ694 + 3.3 + DJ1077 + DJ1080</b> |               |           |                                                        |                 |
| DJ694;3.3                            | Bg2;1077,1080 | 03-Aug-07 | 1.29                                                   | 5.65            |
| DJ694;3.3                            | Bg2;1077,1080 | 03-Aug-07 | 1.10                                                   | 4.84            |
| DJ694;3.3                            | Bg2;1077,1080 | 03-Aug-07 | 0.87                                                   | 3.84            |
| DJ694;3.3                            | Bg2;1077,1080 | 15-Aug-07 | 0.18                                                   | 4.81            |
| DJ694;3.3                            | Bg2;1077,1080 | 15-Aug-07 | 0.25                                                   | 6.94            |
| DJ694;3.3                            | Bg2;1077,1080 | 15-Aug-07 | 0.22                                                   | 6.15            |
| DJ694;3.3                            | Bg2;1077,1080 | 12-Jul-07 | 0.84                                                   | 8.05            |
| DJ694;3.3                            | Bg2;1077,1080 | 12-Jul-07 | 0.87                                                   | 8.35            |
| DJ694;3.3                            | Bg2;1077,1080 | 12-Jul-07 | 1.16                                                   | 11.18           |
| DJ694;3.3                            | Bg2;1077,1080 | 30-Jul-07 | 0.56                                                   | 4.63            |
| DJ694;3.3                            | Bg2;1077,1080 | 30-Jul-07 | 0.69                                                   | 5.67            |
| DJ694;3.3                            | Bg2;1077,1080 | 30-Jul-07 | 0.58                                                   | 4.78            |
| <b>DJ694 + 3.3 + DJ1080 + DJ1083</b> |               |           |                                                        |                 |
| DJ694;3.3                            | Bg2;1080,1083 | 03-Aug-07 | 2.47                                                   | 10.87           |
| DJ694;3.3                            | Bg2;1080,1083 | 03-Aug-07 | 3.16                                                   | 13.88           |
| DJ694;3.3                            | Bg2;1080,1083 | 03-Aug-07 | 3.13                                                   | 13.76           |
| DJ694;3.3                            | Bg2;1080,1083 | 15-Aug-07 | 0.42                                                   | 11.47           |
| DJ694;3.3                            | Bg2;1080,1083 | 15-Aug-07 | 0.50                                                   | 13.74           |
| DJ694;3.3                            | Bg2;1080,1083 | 15-Aug-07 | 0.49                                                   | 13.38           |
| DJ694;3.3                            | Bg2;1080,1083 | 12-Jul-07 | 1.21                                                   | 11.65           |
| DJ694;3.3                            | Bg2;1080,1083 | 12-Jul-07 | 1.79                                                   | 17.18           |
| DJ694;3.3                            | Bg2;1080,1083 | 12-Jul-07 | 1.50                                                   | 14.44           |

Late pupae

| Parents                                       |               | Date      | Specific activity<br>$\Delta$ mOD/min/ $\mu$ g protein | % DJ694 control |
|-----------------------------------------------|---------------|-----------|--------------------------------------------------------|-----------------|
| Male                                          | Female        |           |                                                        |                 |
| DJ694;3.3                                     | Bg2;1080,1083 | 30-Jul-07 | 1.02                                                   | 8.34            |
| DJ694;3.3                                     | Bg2;1080,1083 | 30-Jul-07 | 1.14                                                   | 9.37            |
| DJ694;3.3                                     | Bg2;1080,1083 | 30-Jul-07 | 1.25                                                   | 10.25           |
| <b>DJ694 + 2.1 + 3.3 + DJ1077</b>             |               |           |                                                        |                 |
| DJ694;1077                                    | Bg2;2.1,3.3   | 03-Aug-07 | 0.69                                                   | 3.05            |
| DJ694;1077                                    | Bg2;2.1,3.3   | 03-Aug-07 | 0.79                                                   | 3.48            |
| DJ694;1077                                    | Bg2;2.1,3.3   | 03-Aug-07 | 0.66                                                   | 2.89            |
| DJ694;1077                                    | Bg2;2.1,3.3   | 15-Aug-07 | 0.13                                                   | 3.44            |
| DJ694;1077                                    | Bg2;2.1,3.3   | 15-Aug-07 | 0.14                                                   | 3.93            |
| DJ694;1077                                    | Bg2;2.1,3.3   | 15-Aug-07 | 0.11                                                   | 3.11            |
| DJ694;1077                                    | Bg2;2.1,3.3   | 04-Jul-07 | 0.60                                                   | 7.78            |
| DJ694;1077                                    | Bg2;2.1,3.3   | 04-Jul-07 | 0.82                                                   | 10.63           |
| DJ694;1077                                    | Bg2;2.1,3.3   | 04-Jul-07 | 0.42                                                   | 5.44            |
| DJ694;1077                                    | Bg2;2.1,3.3   | 12-Jul-07 | 1.37                                                   | 13.12           |
| DJ694;1077                                    | Bg2;2.1,3.3   | 12-Jul-07 | 0.65                                                   | 6.22            |
| DJ694;1077                                    | Bg2;2.1,3.3   | 12-Jul-07 | 0.43                                                   | 4.16            |
| DJ694;1077                                    | Bg2;2.1,3.3   | 30-Jul-07 | 0.36                                                   | 2.95            |
| DJ694;1077                                    | Bg2;2.1,3.3   | 30-Jul-07 | 0.26                                                   | 2.16            |
| <b>DJ694 + 2.1 + 3.3 + DJ1080</b>             |               |           |                                                        |                 |
| DJ694;1080                                    | Bg2;2.1,3.3   | 03-Aug-07 | 1.59                                                   | 7.01            |
| DJ694;1080                                    | Bg2;2.1,3.3   | 03-Aug-07 | 1.06                                                   | 4.67            |
| DJ694;1080                                    | Bg2;2.1,3.3   | 03-Aug-07 | 1.06                                                   | 4.65            |
| DJ694;1080                                    | Bg2;2.1,3.3   | 15-Aug-07 | 0.31                                                   | 8.44            |
| DJ694;1080                                    | Bg2;2.1,3.3   | 15-Aug-07 | 0.17                                                   | 4.75            |
| DJ694;1080                                    | Bg2;2.1,3.3   | 15-Aug-07 | 0.28                                                   | 7.70            |
| DJ694;1080                                    | Bg2;2.1,3.3   | 04-Jul-07 | 0.79                                                   | 10.15           |
| DJ694;1080                                    | Bg2;2.1,3.3   | 04-Jul-07 | 1.48                                                   | 19.04           |
| DJ694;1080                                    | Bg2;2.1,3.3   | 04-Jul-07 | 0.85                                                   | 10.92           |
| DJ694;1080                                    | Bg2;2.1,3.3   | 12-Jul-07 | 1.05                                                   | 10.14           |
| DJ694;1080                                    | Bg2;2.1,3.3   | 12-Jul-07 | 0.99                                                   | 9.48            |
| DJ694;1080                                    | Bg2;2.1,3.3   | 12-Jul-07 | 0.56                                                   | 5.35            |
| DJ694;1080                                    | Bg2;2.1,3.3   | 30-Jul-07 | 0.94                                                   | 7.70            |
| DJ694;1080                                    | Bg2;2.1,3.3   | 30-Jul-07 | 0.57                                                   | 4.68            |
| DJ694;1080                                    | Bg2;2.1,3.3   | 30-Jul-07 | 0.96                                                   | 7.87            |
| <b>DJ694 + 2 copies 2.1 + 2 copies DJ1077</b> |               |           |                                                        |                 |
| DJ694;2.1,1077                                | Bg2;2.1,1077  | 13-Nov-07 | 0.41                                                   | 5.14            |
| DJ694;2.1,1077                                | Bg2;2.1,1077  | 13-Nov-07 | 0.34                                                   | 4.34            |
| DJ694;2.1,1077                                | Bg2;2.1,1077  | 13-Nov-07 | 0.35                                                   | 4.43            |
| DJ694;2.1,1077                                | Bg2;2.1,1077  | 30-Nov-07 | 0.36                                                   | 3.61            |

Late pupae

| Parents                                       |                  | Date      | Specific activity<br>$\Delta$ mOD/min/ $\mu$ g protein | % DJ694 control |
|-----------------------------------------------|------------------|-----------|--------------------------------------------------------|-----------------|
| Male                                          | Female           |           |                                                        |                 |
| DJ694;2.1,1077                                | Bg2;2.1,1077     | 30-Nov-07 | 0.36                                                   | 3.55            |
| DJ694;2.1,1077                                | Bg2;2.1,1077     | 30-Nov-07 | 0.33                                                   | 3.26            |
| DJ694;2.1,1077                                | Bg2;2.1,1077     | 19-Dec-07 | 0.66                                                   | 5.31            |
| DJ694;2.1,1077                                | Bg2;2.1,1077     | 19-Dec-07 | 0.94                                                   | 7.58            |
| DJ694;2.1,1077                                | Bg2;2.1,1077     | 19-Dec-07 | 1.19                                                   | 9.62            |
| DJ694;2.1,1077                                | Bg2;2.1,1077     | 19-Dec-07 | 0.96                                                   | 7.75            |
| DJ694;2.1,1077                                | Bg2;2.1,1077     | 19-Dec-07 | 0.88                                                   | 7.10            |
| DJ694;2.1,1077                                | Bg2;2.1,1077     | 19-Dec-07 | 1.42                                                   | 11.51           |
| DJ694;2.1,1077                                | Bg2;2.1,1077     | 10-Feb-08 | 0.87                                                   | 2.99            |
| DJ694;2.1,1077                                | Bg2;2.1,1077     | 10-Feb-08 | 0.58                                                   | 2.01            |
| DJ694;2.1,1077                                | Bg2;2.1,1077     | 10-Feb-08 | 0.55                                                   | 1.91            |
| DJ694;2.1,1077                                | Bg2;2.1,1077     | 22-Feb-08 | 0.69                                                   | 3.66            |
| DJ694;2.1,1077                                | Bg2;2.1,1077     | 22-Feb-08 | 0.55                                                   | 2.91            |
| DJ694;2.1,1077                                | Bg2;2.1,1077     | 22-Feb-08 | 0.58                                                   | 3.04            |
| <b>DJ694 + 2 copies 2.1 + DJ1077 + DJ1079</b> |                  |           |                                                        |                 |
| DJ694;2.1,1077                                | Bg2;2.1,1079(13) | 13-Nov-07 | 0.73                                                   | 9.20            |
| DJ694;2.1,1077                                | Bg2;2.1,1079(13) | 13-Nov-07 | 0.29                                                   | 3.66            |
| DJ694;2.1,1077                                | Bg2;2.1,1079(13) | 13-Nov-07 | 0.36                                                   | 4.52            |
| DJ694;2.1,1077                                | Bg2;2.1,1079(13) | 30-Nov-07 | 0.40                                                   | 3.94            |
| DJ694;2.1,1077                                | Bg2;2.1,1079(13) | 30-Nov-07 | 0.36                                                   | 3.60            |
| DJ694;2.1,1077                                | Bg2;2.1,1079(13) | 30-Nov-07 | 0.46                                                   | 4.55            |
| DJ694;2.1,1077                                | Bg2;2.1,1079(13) | 19-Dec-07 | 0.64                                                   | 5.18            |
| DJ694;2.1,1077                                | Bg2;2.1,1079(13) | 19-Dec-07 | 0.45                                                   | 3.63            |
| DJ694;2.1,1077                                | Bg2;2.1,1079(13) | 19-Dec-07 | 0.56                                                   | 4.50            |
| DJ694;2.1,1077                                | Bg2;2.1,1079(14) | 13-Nov-07 | 0.43                                                   | 5.42            |
| DJ694;2.1,1077                                | Bg2;2.1,1079(14) | 13-Nov-07 | 0.44                                                   | 5.58            |
| DJ694;2.1,1077                                | Bg2;2.1,1079(14) | 13-Nov-07 | 0.35                                                   | 4.39            |
| DJ694;2.1,1077                                | Bg2;2.1,1079(14) | 30-Nov-07 | 0.26                                                   | 2.52            |
| DJ694;2.1,1077                                | Bg2;2.1,1079(14) | 30-Nov-07 | 0.46                                                   | 4.52            |
| DJ694;2.1,1077                                | Bg2;2.1,1079(14) | 30-Nov-07 | 0.38                                                   | 3.75            |
| DJ694;2.1,1077                                | Bg2;2.1,1079(14) | 19-Dec-07 | 2.64                                                   | 21.38           |
| DJ694;2.1,1077                                | Bg2;2.1,1079(14) | 19-Dec-07 | 2.09                                                   | 16.88           |
| DJ694;2.1,1077                                | Bg2;2.1,1079(14) | 19-Dec-07 | 1.55                                                   | 12.52           |
| DJ694;2.1,1077                                | Bg2;2.1,1079(14) | 19-Dec-07 | 1.51                                                   | 12.18           |
| DJ694;2.1,1077                                | Bg2;2.1,1079(14) | 19-Dec-07 | 3.17                                                   | 25.61           |
| DJ694;2.1,1077                                | Bg2;2.1,1079(14) | 19-Dec-07 | 1.92                                                   | 15.52           |
| DJ694;2.1,1079(13)                            | Bg2;2.1,1077     | 19-Dec-07 | 0.78                                                   | 6.33            |
| DJ694;2.1,1079(13)                            | Bg2;2.1,1077     | 19-Dec-07 | 0.72                                                   | 5.85            |
| DJ694;2.1,1079(13)                            | Bg2;2.1,1077     | 19-Dec-07 | 0.93                                                   | 7.50            |
| DJ694;2.1,1079(14)                            | Bg2;2.1,1077     | 19-Dec-07 | 1.07                                                   | 8.64            |

Late pupae

| Parents            |                  | Date      | Specific activity<br>$\Delta$ mOD/min/ $\mu$ g protein | % DJ694 control |
|--------------------|------------------|-----------|--------------------------------------------------------|-----------------|
| Male               | Female           |           |                                                        |                 |
| DJ694;2.1,1079(14) | Bg2;2.1,1077     | 19-Dec-07 | 2.21                                                   | 17.85           |
| DJ694;2.1,1079(14) | Bg2;2.1,1077     | 19-Dec-07 | 0.44                                                   | 3.53            |
| DJ694;2.1,1079(14) | Bg2;2.1,1077     | 19-Dec-07 | 0.35                                                   | 2.81            |
| DJ694;2.1,1079(14) | Bg2;2.1,1077     | 19-Dec-07 | 0.31                                                   | 2.55            |
| DJ694;2.1,1077     | Bg2;2.1,1079(13) | 10-Feb-08 | 0.92                                                   | 3.17            |
| DJ694;2.1,1077     | Bg2;2.1,1079(13) | 10-Feb-08 | 2.00                                                   | 6.91            |
| DJ694;2.1,1077     | Bg2;2.1,1079(13) | 10-Feb-08 | 1.96                                                   | 6.77            |
| DJ694;2.1,1077     | Bg2;2.1,1079(13) | 22-Feb-08 | 0.34                                                   | 1.82            |
| DJ694;2.1,1077     | Bg2;2.1,1079(13) | 22-Feb-08 | 0.74                                                   | 3.93            |
| DJ694;2.1,1077     | Bg2;2.1,1079(13) | 22-Feb-08 | 0.40                                                   | 2.14            |
| DJ694;2.1,1077     | Bg2;2.1,1079(14) | 10-Feb-08 | 0.65                                                   | 2.25            |
| DJ694;2.1,1077     | Bg2;2.1,1079(14) | 10-Feb-08 | 0.94                                                   | 3.24            |
| DJ694;2.1,1077     | Bg2;2.1,1079(14) | 10-Feb-08 | 1.88                                                   | 6.49            |
| DJ694;2.1,1079(13) | Bg2;2.1,1077     | 10-Feb-08 | 0.96                                                   | 3.30            |
| DJ694;2.1,1079(13) | Bg2;2.1,1077     | 10-Feb-08 | 1.01                                                   | 3.48            |
| DJ694;2.1,1079(13) | Bg2;2.1,1077     | 10-Feb-08 | 1.78                                                   | 6.14            |
| DJ694;2.1,1079(13) | Bg2;2.1,1077     | 22-Feb-08 | 2.95                                                   | 15.57           |
| DJ694;2.1,1079(13) | Bg2;2.1,1077     | 22-Feb-08 | 1.12                                                   | 5.91            |
| DJ694;2.1,1079(13) | Bg2;2.1,1077     | 22-Feb-08 | 0.57                                                   | 2.99            |
| DJ694;2.1,1079(14) | Bg2;2.1,1077     | 10-Feb-08 | 2.30                                                   | 7.94            |
| DJ694;2.1,1079(14) | Bg2;2.1,1077     | 10-Feb-08 | 2.75                                                   | 9.47            |
| DJ694;2.1,1079(14) | Bg2;2.1,1077     | 10-Feb-08 | 3.35                                                   | 11.55           |
| DJ694;2.1,1079(14) | Bg2;2.1,1077     | 19-Dec-07 | 3.41                                                   | 27.56           |

**DJ694 + 2.1 + 3.3 + 2 copies DJ1077**

|                |              |           |      |      |
|----------------|--------------|-----------|------|------|
| DJ694;2.1,1077 | Bg2;3.3,1077 | 13-Nov-07 | 0.43 | 5.40 |
| DJ694;2.1,1077 | Bg2;3.3,1077 | 13-Nov-07 | 0.29 | 3.66 |
| DJ694;2.1,1077 | Bg2;3.3,1077 | 13-Nov-07 | 0.30 | 3.79 |
| DJ694;2.1,1077 | Bg2;3.3,1077 | 30-Nov-07 | 0.26 | 2.61 |
| DJ694;2.1,1077 | Bg2;3.3,1077 | 30-Nov-07 | 0.23 | 2.28 |
| DJ694;2.1,1077 | Bg2;3.3,1077 | 30-Nov-07 | 0.29 | 2.91 |
| DJ694;2.1,1077 | Bg2;3.3,1077 | 19-Dec-07 | 0.74 | 6.02 |
| DJ694;2.1,1077 | Bg2;3.3,1077 | 19-Dec-07 | 1.01 | 8.21 |
| DJ694;2.1,1077 | Bg2;3.3,1077 | 19-Dec-07 | 0.81 | 6.58 |
| DJ694;2.1,1077 | Bg2;3.3,1077 | 19-Dec-07 | 0.71 | 5.72 |
| DJ694;2.1,1077 | Bg2;3.3,1077 | 19-Dec-07 | 0.98 | 7.91 |
| DJ694;3.3,1077 | Bg2;2.1,1077 | 13-Nov-07 | 0.23 | 2.88 |
| DJ694;3.3,1077 | Bg2;2.1,1077 | 13-Nov-07 | 0.36 | 4.50 |
| DJ694;3.3,1077 | Bg2;2.1,1077 | 13-Nov-07 | 0.33 | 4.10 |
| DJ694;3.3,1077 | Bg2;2.1,1077 | 30-Nov-07 | 0.34 | 3.36 |
| DJ694;3.3,1077 | Bg2;2.1,1077 | 30-Nov-07 | 0.41 | 4.10 |

Late pupae

| Parents        |              | Date      | Specific activity<br>$\Delta$ mOD/min/ $\mu$ g protein | % DJ694 control |
|----------------|--------------|-----------|--------------------------------------------------------|-----------------|
| Male           | Female       |           |                                                        |                 |
| DJ694;3.3,1077 | Bg2;2.1,1077 | 30-Nov-07 | 0.48                                                   | 4.78            |
| DJ694;3.3,1077 | Bg2;2.1,1077 | 19-Dec-07 | 0.89                                                   | 7.16            |
| DJ694;3.3,1077 | Bg2;2.1,1077 | 19-Dec-07 | 0.81                                                   | 6.55            |
| DJ694;3.3,1077 | Bg2;2.1,1077 | 19-Dec-07 | 0.78                                                   | 6.32            |
| DJ694;3.3,1077 | Bg2;2.1,1077 | 19-Dec-07 | 1.05                                                   | 8.48            |
| DJ694;3.3,1077 | Bg2;2.1,1077 | 19-Dec-07 | 0.45                                                   | 3.68            |
| DJ694;2.1,1077 | Bg2;3.3,1077 | 10-Feb-08 | 0.55                                                   | 1.90            |
| DJ694;2.1,1077 | Bg2;3.3,1077 | 10-Feb-08 | 0.61                                                   | 2.12            |
| DJ694;2.1,1077 | Bg2;3.3,1077 | 10-Feb-08 | 0.54                                                   | 1.86            |
| DJ694;2.1,1077 | Bg2;3.3,1077 | 22-Feb-08 | 1.26                                                   | 6.63            |
| DJ694;2.1,1077 | Bg2;3.3,1077 | 22-Feb-08 | 0.40                                                   | 2.12            |
| DJ694;2.1,1077 | Bg2;3.3,1077 | 22-Feb-08 | 0.37                                                   | 1.98            |
| DJ694;3.3,1077 | Bg2;2.1,1077 | 10-Feb-08 | 0.56                                                   | 1.93            |
| DJ694;3.3,1077 | Bg2;2.1,1077 | 10-Feb-08 | 0.57                                                   | 1.98            |
| DJ694;3.3,1077 | Bg2;2.1,1077 | 10-Feb-08 | 0.63                                                   | 2.16            |
| DJ694;3.3,1077 | Bg2;2.1,1077 | 22-Feb-08 | 0.61                                                   | 3.22            |
| DJ694;3.3,1077 | Bg2;2.1,1077 | 22-Feb-08 | 0.61                                                   | 3.22            |
| DJ694;3.3,1077 | Bg2;2.1,1077 | 22-Feb-08 | 0.69                                                   | 3.66            |
| DJ694;2.1,1077 | Bg2;3.3,1077 | 19-Dec-07 | 1.70                                                   | 13.72           |
| DJ694;3.3,1077 | Bg2;2.1,1077 | 19-Dec-07 | 2.13                                                   | 17.25           |

**DJ694 + 2.1 + 3.3 + DJ1077 + DJ1079**

|                    |              |           |      |       |
|--------------------|--------------|-----------|------|-------|
| DJ694;2.1,1077     | Bg2;3.3,1079 | 13-Nov-07 | 0.32 | 4.06  |
| DJ694;2.1,1077     | Bg2;3.3,1079 | 13-Nov-07 | 0.30 | 3.82  |
| DJ694;2.1,1077     | Bg2;3.3,1079 | 13-Nov-07 | 0.45 | 5.71  |
| DJ694;2.1,1077     | Bg2;3.3,1079 | 30-Nov-07 | 0.30 | 2.99  |
| DJ694;2.1,1077     | Bg2;3.3,1079 | 30-Nov-07 | 0.48 | 4.78  |
| DJ694;2.1,1077     | Bg2;3.3,1079 | 30-Nov-07 | 0.83 | 8.21  |
| DJ694;2.1,1077     | Bg2;3.3,1079 | 19-Dec-07 | 1.28 | 10.36 |
| DJ694;2.1,1077     | Bg2;3.3,1079 | 19-Dec-07 | 1.69 | 13.70 |
| DJ694;2.1,1077     | Bg2;3.3,1079 | 19-Dec-07 | 1.49 | 12.02 |
| DJ694;2.1,1077     | Bg2;3.3,1079 | 19-Dec-07 | 1.52 | 12.32 |
| DJ694;2.1,1077     | Bg2;3.3,1079 | 19-Dec-07 | 2.12 | 17.14 |
| DJ694;2.1,1079(13) | Bg2;3.3,1077 | 19-Dec-07 | 0.56 | 4.56  |
| DJ694;2.1,1079(13) | Bg2;3.3,1077 | 19-Dec-07 | 0.55 | 4.43  |
| DJ694;2.1,1079(14) | Bg2;3.3,1077 | 19-Dec-07 | 1.94 | 15.67 |
| DJ694;2.1,1079(14) | Bg2;3.3,1077 | 19-Dec-07 | 1.63 | 13.17 |
| DJ694;2.1,1079(14) | Bg2;3.3,1077 | 19-Dec-07 | 2.36 | 19.08 |
| DJ694;2.1,1079(14) | Bg2;3.3,1077 | 19-Dec-07 | 0.69 | 5.58  |
| DJ694;2.1,1079(14) | Bg2;3.3,1077 | 19-Dec-07 | 0.43 | 3.49  |
| DJ694;2.1,1079(14) | Bg2;3.3,1077 | 19-Dec-07 | 0.77 | 6.25  |

Late pupae

| <b>Parents</b>     |                  | <b>Date</b> | <b>Specific activity<br/><math>\Delta</math>OD/min/<math>\mu</math>g protein</b> | <b>% DJ694 control</b> |
|--------------------|------------------|-------------|----------------------------------------------------------------------------------|------------------------|
| <b>Male</b>        | <b>Female</b>    |             |                                                                                  |                        |
| DJ694;3.3,1077     | Bg2;2.1,1079(13) | 13-Nov-07   | 0.25                                                                             | <b>3.14</b>            |
| DJ694;3.3,1077     | Bg2;2.1,1079(13) | 13-Nov-07   | 0.23                                                                             | <b>2.94</b>            |
| DJ694;3.3,1077     | Bg2;2.1,1079(13) | 13-Nov-07   | 0.26                                                                             | <b>3.26</b>            |
| DJ694;3.3,1077     | Bg2;2.1,1079(13) | 30-Nov-07   | 0.31                                                                             | <b>3.03</b>            |
| DJ694;3.3,1077     | Bg2;2.1,1079(13) | 30-Nov-07   | 0.28                                                                             | <b>2.81</b>            |
| DJ694;3.3,1077     | Bg2;2.1,1079(13) | 30-Nov-07   | 0.34                                                                             | <b>3.35</b>            |
| DJ694;3.3,1077     | Bg2;2.1,1079(13) | 19-Dec-07   | 0.77                                                                             | <b>6.20</b>            |
| DJ694;3.3,1077     | Bg2;2.1,1079(13) | 19-Dec-07   | 0.71                                                                             | <b>5.74</b>            |
| DJ694;3.3,1077     | Bg2;2.1,1079(13) | 19-Dec-07   | 0.75                                                                             | <b>6.08</b>            |
| DJ694;3.3,1077     | Bg2;2.1,1079(14) | 13-Nov-07   | 0.30                                                                             | <b>3.79</b>            |
| DJ694;3.3,1077     | Bg2;2.1,1079(14) | 13-Nov-07   | 0.57                                                                             | <b>7.19</b>            |
| DJ694;3.3,1077     | Bg2;2.1,1079(14) | 13-Nov-07   | 0.52                                                                             | <b>6.51</b>            |
| DJ694;3.3,1077     | Bg2;2.1,1079(14) | 30-Nov-07   | 0.45                                                                             | <b>4.46</b>            |
| DJ694;3.3,1077     | Bg2;2.1,1079(14) | 30-Nov-07   | 0.47                                                                             | <b>4.63</b>            |
| DJ694;3.3,1077     | Bg2;2.1,1079(14) | 30-Nov-07   | 0.31                                                                             | <b>3.06</b>            |
| DJ694;3.3,1077     | Bg2;2.1,1079(14) | 19-Dec-07   | 1.37                                                                             | <b>11.09</b>           |
| DJ694;3.3,1077     | Bg2;2.1,1079(14) | 19-Dec-07   | 1.99                                                                             | <b>16.12</b>           |
| DJ694;3.3,1077     | Bg2;2.1,1079(14) | 19-Dec-07   | 1.76                                                                             | <b>14.26</b>           |
| DJ694;3.3,1077     | Bg2;2.1,1079(14) | 19-Dec-07   | 1.51                                                                             | <b>12.24</b>           |
| DJ694;3.3,1077     | Bg2;2.1,1079(14) | 19-Dec-07   | 1.42                                                                             | <b>11.53</b>           |
| DJ694;1077,1079    | Bg2;2.1,3.3      | 15-Jun-07   | 0.68                                                                             | <b>3.23</b>            |
| DJ694;1077,1079    | Bg2;2.1,3.3      | 15-Jun-07   | 2.05                                                                             | <b>9.70</b>            |
| DJ694;1077,1079    | Bg2;2.1,3.3      | 15-Jun-07   | 0.85                                                                             | <b>4.01</b>            |
| DJ694;1077,1079    | Bg2;2.1,3.3      | 04-Jul-07   | 0.72                                                                             | <b>9.24</b>            |
| DJ694;1077,1079    | Bg2;2.1,3.3      | 04-Jul-07   | 0.48                                                                             | <b>6.16</b>            |
| DJ694;1077,1079    | Bg2;2.1,3.3      | 04-Jul-07   | 0.28                                                                             | <b>3.68</b>            |
| DJ694;2.1,1077     | Bg2;3.3,1079     | 10-Feb-08   | 0.68                                                                             | <b>2.34</b>            |
| DJ694;2.1,1077     | Bg2;3.3,1079     | 10-Feb-08   | 1.54                                                                             | <b>5.32</b>            |
| DJ694;2.1,1077     | Bg2;3.3,1079     | 10-Feb-08   | 0.71                                                                             | <b>2.44</b>            |
| DJ694;2.1,1079(13) | Bg2;3.3,1077     | 10-Feb-08   | 0.60                                                                             | <b>2.08</b>            |
| DJ694;2.1,1079(13) | Bg2;3.3,1077     | 10-Feb-08   | 0.60                                                                             | <b>2.07</b>            |
| DJ694;2.1,1079(13) | Bg2;3.3,1077     | 10-Feb-08   | 0.64                                                                             | <b>2.22</b>            |
| DJ694;2.1,1079(13) | Bg2;3.3,1077     | 10-Feb-08   | 0.67                                                                             | <b>2.32</b>            |
| DJ694;2.1,1079(13) | Bg2;3.3,1077     | 22-Feb-08   | 0.37                                                                             | <b>1.97</b>            |
| DJ694;2.1,1079(13) | Bg2;3.3,1077     | 22-Feb-08   | 0.55                                                                             | <b>2.90</b>            |
| DJ694;2.1,1079(13) | Bg2;3.3,1077     | 22-Feb-08   | 0.48                                                                             | <b>2.53</b>            |
| DJ694;2.1,1079(14) | Bg2;3.3,1077     | 10-Feb-08   | 1.64                                                                             | <b>5.65</b>            |
| DJ694;2.1,1079(14) | Bg2;3.3,1077     | 10-Feb-08   | 1.72                                                                             | <b>5.92</b>            |
| DJ694;2.1,1079(14) | Bg2;3.3,1077     | 10-Feb-08   | 1.33                                                                             | <b>4.57</b>            |
| DJ694;3.3,1077     | Bg2;2.1,1079(13) | 10-Feb-08   | 0.58                                                                             | <b>2.00</b>            |

Late pupae

| Parents            |                  | Date      | Specific activity<br>$\Delta$ mOD/min/ $\mu$ g protein | % DJ694 control |
|--------------------|------------------|-----------|--------------------------------------------------------|-----------------|
| Male               | Female           |           |                                                        |                 |
| DJ694;3.3,1077     | Bg2;2.1,1079(13) | 10-Feb-08 | 0.86                                                   | <b>2.98</b>     |
| DJ694;3.3,1077     | Bg2;2.1,1079(13) | 10-Feb-08 | 0.57                                                   | <b>1.97</b>     |
| DJ694;3.3,1077     | Bg2;2.1,1079(13) | 22-Feb-08 | 0.55                                                   | <b>2.90</b>     |
| DJ694;3.3,1077     | Bg2;2.1,1079(13) | 22-Feb-08 | 0.46                                                   | <b>2.42</b>     |
| DJ694;3.3,1077     | Bg2;2.1,1079(13) | 22-Feb-08 | 0.55                                                   | <b>2.89</b>     |
| DJ694;3.3,1077     | Bg2;2.1,1079(14) | 10-Feb-08 | 0.58                                                   | <b>1.99</b>     |
| DJ694;3.3,1077     | Bg2;2.1,1079(14) | 10-Feb-08 | 0.96                                                   | <b>3.29</b>     |
| DJ694;3.3,1077     | Bg2;2.1,1079(14) | 10-Feb-08 | 0.73                                                   | <b>2.53</b>     |
| DJ694;2.1,1077     | Bg2;3.3,1079     | 19-Dec-07 | 2.70                                                   | 21.84           |
| DJ694;2.1,1079(13) | Bg2;3.3,1077     | 19-Dec-07 | 1.23                                                   | 9.93            |
| DJ694;3.3,1077     | Bg2;2.1,1079(14) | 19-Dec-07 | 0.36                                                   | 2.90            |

**DJ694 + 2 copies 2.1 + 2 copies DJ1079**

|                    |                  |           |      |              |
|--------------------|------------------|-----------|------|--------------|
| DJ694;2.1,1079(13) | Bg2;2.1,1079(13) | 10-Feb-08 | 0.73 | <b>2.52</b>  |
| DJ694;2.1,1079(13) | Bg2;2.1,1079(13) | 10-Feb-08 | 0.50 | <b>1.71</b>  |
| DJ694;2.1,1079(13) | Bg2;2.1,1079(13) | 10-Feb-08 | 0.63 | <b>2.17</b>  |
| DJ694;2.1,1079(13) | Bg2;2.1,1079(14) | 10-Feb-08 | 0.70 | <b>2.42</b>  |
| DJ694;2.1,1079(13) | Bg2;2.1,1079(14) | 10-Feb-08 | 0.90 | <b>3.10</b>  |
| DJ694;2.1,1079(13) | Bg2;2.1,1079(13) | 19-Dec-07 | 0.39 | <b>3.15</b>  |
| DJ694;2.1,1079(13) | Bg2;2.1,1079(13) | 19-Dec-07 | 0.49 | <b>3.95</b>  |
| DJ694;2.1,1079(13) | Bg2;2.1,1079(14) | 19-Dec-07 | 0.60 | <b>4.83</b>  |
| DJ694;2.1,1079(13) | Bg2;2.1,1079(14) | 19-Dec-07 | 0.73 | <b>5.93</b>  |
| DJ694;2.1,1079(14) | Bg2;2.1,1079(13) | 19-Dec-07 | 1.38 | <b>11.15</b> |
| DJ694;2.1,1079(14) | Bg2;2.1,1079(13) | 19-Dec-07 | 1.35 | <b>10.96</b> |
| DJ694;2.1,1079(14) | Bg2;2.1,1079(13) | 19-Dec-07 | 1.35 | <b>10.94</b> |
| DJ694;2.1,1079(14) | Bg2;2.1,1079(14) | 19-Dec-07 | 2.46 | <b>19.93</b> |
| DJ694;2.1,1079(14) | Bg2;2.1,1079(14) | 19-Dec-07 | 2.58 | <b>20.90</b> |
| DJ694;2.1,1079(14) | Bg2;2.1,1079(14) | 19-Dec-07 | 2.52 | <b>20.42</b> |
| DJ694;2.1,1079(14) | Bg2;2.1,1079(14) | 19-Dec-07 | 0.78 | <b>6.35</b>  |
| DJ694;2.1,1079(14) | Bg2;2.1,1079(14) | 19-Dec-07 | 0.91 | <b>7.33</b>  |
| DJ694;2.1,1079(14) | Bg2;2.1,1079(14) | 19-Dec-07 | 0.53 | <b>4.30</b>  |
| DJ694;2.1,1079(14) | Bg2;2.1,1079(13) | 10-Feb-08 | 3.23 | <b>11.13</b> |
| DJ694;2.1,1079(14) | Bg2;2.1,1079(13) | 10-Feb-08 | 3.07 | <b>10.58</b> |
| DJ694;2.1,1079(14) | Bg2;2.1,1079(13) | 10-Feb-08 | 3.89 | <b>13.41</b> |
| DJ694;2.1,1079(14) | Bg2;2.1,1079(14) | 10-Feb-08 | 1.60 | <b>5.50</b>  |
| DJ694;2.1,1079(14) | Bg2;2.1,1079(14) | 10-Feb-08 | 3.50 | <b>12.05</b> |
| DJ694;2.1,1079(14) | Bg2;2.1,1079(14) | 10-Feb-08 | 1.60 | <b>5.53</b>  |
| DJ694;2.1,1079(13) | Bg2;2.1,1079(13) | 19-Dec-07 | 1.03 | 8.33         |
| DJ694;2.1,1079(13) | Bg2;2.1,1079(14) | 19-Dec-07 | 3.16 | 25.56        |

**DJ694 + 2.1 + 3.3 + 2 copies DJ1079**

|                    |              |           |      |              |
|--------------------|--------------|-----------|------|--------------|
| DJ694;2.1,1079(13) | Bg2;3.3,1079 | 19-Dec-07 | 1.25 | <b>10.09</b> |
|--------------------|--------------|-----------|------|--------------|



Late pupae

| Parents            |              | Date      | Specific activity<br>$\Delta$ mOD/min/ $\mu$ g protein | % DJ694 control |
|--------------------|--------------|-----------|--------------------------------------------------------|-----------------|
| Male               | Female       |           |                                                        |                 |
| DJ694;2.1,1079(13) | Bg2;3.3,1079 | 19-Dec-07 | 1.02                                                   | 8.27            |
| DJ694;2.1,1079(14) | Bg2;3.3,1079 | 19-Dec-07 | 3.31                                                   | 26.77           |
| DJ694;2.1,1079(14) | Bg2;3.3,1079 | 19-Dec-07 | 3.52                                                   | 28.46           |
| DJ694;2.1,1079(14) | Bg2;3.3,1079 | 19-Dec-07 | 2.90                                                   | 23.49           |
| DJ694;2.1,1079(14) | Bg2;3.3,1079 | 19-Dec-07 | 0.67                                                   | 5.45            |
| DJ694;2.1,1079(14) | Bg2;3.3,1079 | 19-Dec-07 | 0.43                                                   | 3.45            |
| DJ694;2.1,1079(14) | Bg2;3.3,1079 | 19-Dec-07 | 0.57                                                   | 4.61            |
| DJ694;2.1,1079(13) | Bg2;3.3,1079 | 10-Feb-08 | 0.73                                                   | 2.51            |
| DJ694;2.1,1079(13) | Bg2;3.3,1079 | 10-Feb-08 | 1.25                                                   | 4.31            |
| DJ694;2.1,1079(13) | Bg2;3.3,1079 | 10-Feb-08 | 1.02                                                   | 3.51            |
| DJ694;2.1,1079(14) | Bg2;3.3,1079 | 10-Feb-08 | 2.87                                                   | 9.88            |
| DJ694;2.1,1079(14) | Bg2;3.3,1079 | 10-Feb-08 | 1.92                                                   | 6.62            |
| DJ694;2.1,1079(14) | Bg2;3.3,1079 | 10-Feb-08 | 1.76                                                   | 6.05            |
| DJ694;2.1,1079(13) | Bg2;3.3,1079 | 19-Dec-07 | 0.48                                                   | 3.89            |

**DJ694 + 2 copies 3.3 + 2 copies DJ1077**

|                |              |           |      |      |
|----------------|--------------|-----------|------|------|
| DJ694;3.3,1077 | Bg2;3.3,1077 | 13-Nov-07 | 0.20 | 2.49 |
| DJ694;3.3,1077 | Bg2;3.3,1077 | 13-Nov-07 | 0.16 | 1.96 |
| DJ694;3.3,1077 | Bg2;3.3,1077 | 13-Nov-07 | 0.13 | 1.60 |
| DJ694;3.3,1077 | Bg2;3.3,1077 | 30-Nov-07 | 0.15 | 1.46 |
| DJ694;3.3,1077 | Bg2;3.3,1077 | 30-Nov-07 | 0.24 | 2.33 |
| DJ694;3.3,1077 | Bg2;3.3,1077 | 30-Nov-07 | 0.29 | 2.91 |
| DJ694;3.3,1077 | Bg2;3.3,1077 | 19-Dec-07 | 1.19 | 9.62 |
| DJ694;3.3,1077 | Bg2;3.3,1077 | 19-Dec-07 | 1.21 | 9.79 |
| DJ694;3.3,1077 | Bg2;3.3,1077 | 19-Dec-07 | 1.07 | 8.63 |
| DJ694;3.3,1077 | Bg2;3.3,1077 | 19-Dec-07 | 0.66 | 5.33 |
| DJ694;3.3,1077 | Bg2;3.3,1077 | 19-Dec-07 | 1.08 | 8.71 |
| DJ694;3.3,1077 | Bg2;3.3,1077 | 10-Feb-08 | 1.04 | 3.57 |
| DJ694;3.3,1077 | Bg2;3.3,1077 | 10-Feb-08 | 1.06 | 3.66 |
| DJ694;3.3,1077 | Bg2;3.3,1077 | 10-Feb-08 | 0.95 | 3.29 |
| DJ694;3.3,1077 | Bg2;3.3,1077 | 22-Feb-08 | 0.49 | 2.57 |
| DJ694;3.3,1077 | Bg2;3.3,1077 | 22-Feb-08 | 0.61 | 3.20 |
| DJ694;3.3,1077 | Bg2;3.3,1077 | 22-Feb-08 | 0.55 | 2.91 |
| DJ694;3.3,1077 | Bg2;3.3,1077 | 19-Dec-07 | 0.60 | 4.81 |

**DJ694 + 2 copies 3.3 + DJ1077 + DJ1079**

|                |              |           |      |      |
|----------------|--------------|-----------|------|------|
| DJ694;3.3,1077 | Bg2;3.3,1079 | 13-Nov-07 | 0.28 | 3.53 |
| DJ694;3.3,1077 | Bg2;3.3,1079 | 13-Nov-07 | 0.28 | 3.57 |
| DJ694;3.3,1077 | Bg2;3.3,1079 | 13-Nov-07 | 0.38 | 4.77 |
| DJ694;3.3,1077 | Bg2;3.3,1079 | 30-Nov-07 | 0.36 | 3.56 |
| DJ694;3.3,1077 | Bg2;3.3,1079 | 30-Nov-07 | 0.30 | 3.00 |
| DJ694;3.3,1077 | Bg2;3.3,1079 | 30-Nov-07 | 0.38 | 3.78 |

Late pupae

| Parents                                       |                  | Date      | Specific activity<br>$\Delta$ mOD/min/ $\mu$ g protein | % DJ694 control |
|-----------------------------------------------|------------------|-----------|--------------------------------------------------------|-----------------|
| Male                                          | Female           |           |                                                        |                 |
| DJ694;3.3,1077                                | Bg2;3.3,1079     | 19-Dec-07 | 0.96                                                   | 7.80            |
| DJ694;3.3,1077                                | Bg2;3.3,1079     | 19-Dec-07 | 1.71                                                   | 13.86           |
| DJ694;3.3,1077                                | Bg2;3.3,1079     | 19-Dec-07 | 1.23                                                   | 9.99            |
| DJ694;3.3,1077                                | Bg2;3.3,1079     | 19-Dec-07 | 1.72                                                   | 13.95           |
| DJ694;3.3,1077                                | Bg2;3.3,1079     | 19-Dec-07 | 1.16                                                   | 9.39            |
| DJ694;3.3,1077                                | Bg2;3.3,1079     | 19-Dec-07 | 1.13                                                   | 9.10            |
| DJ694;3.3,1077                                | Bg2;3.3,1079     | 10-Feb-08 | 0.55                                                   | 1.91            |
| DJ694;3.3,1077                                | Bg2;3.3,1079     | 10-Feb-08 | 0.67                                                   | 2.31            |
| DJ694;3.3,1077                                | Bg2;3.3,1079     | 10-Feb-08 | 0.74                                                   | 2.54            |
| <b>DJ694 + 2.1 + 3.3 + DJ1077 + DJ1080</b>    |                  |           |                                                        |                 |
| DJ694;1077,1080                               | Bg2;2.1,3.3      | 15-Jun-07 | 2.09                                                   | 9.89            |
| DJ694;1077,1080                               | Bg2;2.1,3.3      | 15-Jun-07 | 1.40                                                   | 6.61            |
| DJ694;1077,1080                               | Bg2;2.1,3.3      | 15-Jun-07 | 3.62                                                   | 17.15           |
| DJ694;1077,1080                               | Bg2;2.1,3.3      | 04-Jul-07 | 0.34                                                   | 4.35            |
| DJ694;1077,1080                               | Bg2;2.1,3.3      | 04-Jul-07 | 1.27                                                   | 16.35           |
| DJ694;1077,1080                               | Bg2;2.1,3.3      | 04-Jul-07 | 0.48                                                   | 6.16            |
| DJ694;2.1,3.3                                 | Bg2;1077,1080    | 31-May-07 | 0.97                                                   | 2.25            |
| DJ694;2.1,3.3                                 | Bg2;1077,1080    | 31-May-07 | 0.69                                                   | 1.61            |
| DJ694;2.1,3.3                                 | Bg2;1077,1080    | 31-May-07 | 0.81                                                   | 1.88            |
| DJ694;2.1,3.3                                 | Bg2;1077,1080    | 31-May-07 | 0.25                                                   | 0.57            |
| <b>DJ694 + 2.1 + 3.3 + DJ1080 + DJ1083</b>    |                  |           |                                                        |                 |
| DJ694;1080,1083                               | Bg2;2.1,3.3      | 31-May-07 | 1.67                                                   | 3.88            |
| DJ694;1080,1083                               | Bg2;2.1,3.3      | 31-May-07 | 4.55                                                   | 10.56           |
| DJ694;1080,1083                               | Bg2;2.1,3.3      | 31-May-07 | 3.61                                                   | 8.39            |
| DJ694;1080,1083                               | Bg2;2.1,3.3      | 31-May-07 | 2.02                                                   | 4.70            |
| <b>DJ694 + 2.1 + 2 copies DJ1077 + DJ1079</b> |                  |           |                                                        |                 |
| DJ694;1077,1079                               | Bg2;2.1,1077     | 19-Dec-07 | 0.63                                                   | 5.11            |
| DJ694;1077,1079                               | Bg2;2.1,1077     | 19-Dec-07 | 0.56                                                   | 4.55            |
| DJ694;1077,1079                               | Bg2;2.1,1077     | 19-Dec-07 | 0.51                                                   | 4.11            |
| <b>DJ694 + 2.1 + DJ1077 + 2 copies DJ1079</b> |                  |           |                                                        |                 |
| DJ694;1077,1079                               | Bg2;2.1,1079(14) | 19-Dec-07 | 0.89                                                   | 7.20            |
| DJ694;1077,1079                               | Bg2;2.1,1079(14) | 19-Dec-07 | 1.17                                                   | 9.43            |
| DJ694;1077,1079                               | Bg2;2.1,1079(14) | 19-Dec-07 | 1.83                                                   | 14.80           |
| <b>DJ694 + 3.3 + 2 copies DJ1077 + DJ1079</b> |                  |           |                                                        |                 |
| DJ694;1077,1079                               | Bg2;3.3,1077     | 19-Dec-07 | 0.87                                                   | 7.07            |
| DJ694;1077,1079                               | Bg2;3.3,1077     | 19-Dec-07 | 0.62                                                   | 4.98            |
| DJ694;1077,1079                               | Bg2;3.3,1077     | 19-Dec-07 | 0.68                                                   | 5.48            |
| <b>DJ694 + 3.3 + DJ1077 + 2 copies DJ1079</b> |                  |           |                                                        |                 |
| DJ694;1077,1079                               | Bg2;3.3,1079     | 19-Dec-07 | 1.67                                                   | 13.55           |

Late pupae

| Parents                                       |                  | Date      | Specific activity<br>$\Delta$ mOD/min/ $\mu$ g protein | % DJ694 control |
|-----------------------------------------------|------------------|-----------|--------------------------------------------------------|-----------------|
| Male                                          | Female           |           |                                                        |                 |
| DJ694;1077,1079                               | Bg2;3.3,1079     | 19-Dec-07 | 1.11                                                   | 8.96            |
| DJ694;1077,1079                               | Bg2;3.3,1079     | 19-Dec-07 | 1.40                                                   | 11.34           |
| <b>DJ694 + 2.1 + 2 copies DJ1077 + DJ1080</b> |                  |           |                                                        |                 |
| DJ694;1077,1080                               | Bg2;2.1,1077     | 10-Feb-08 | 1.95                                                   | 6.73            |
| DJ694;1077,1080                               | Bg2;2.1,1077     | 10-Feb-08 | 2.90                                                   | 9.98            |
| DJ694;1077,1080                               | Bg2;2.1,1077     | 10-Feb-08 | 2.29                                                   | 7.91            |
| <b>DJ694 + 2.1 + DJ1077 + DJ1079 + DJ1080</b> |                  |           |                                                        |                 |
| DJ694;1077,1080                               | Bg2;2.1,1079(13) | 10-Feb-08 | 2.63                                                   | 9.06            |
| DJ694;1077,1080                               | Bg2;2.1,1079(13) | 10-Feb-08 | 2.40                                                   | 8.26            |
| DJ694;1077,1080                               | Bg2;2.1,1079(13) | 10-Feb-08 | 1.31                                                   | 4.51            |
| DJ694;1077,1080                               | Bg2;2.1,1079(14) | 10-Feb-08 | 3.37                                                   | 11.61           |
| DJ694;1077,1080                               | Bg2;2.1,1079(14) | 10-Feb-08 | 2.76                                                   | 9.53            |
| DJ694;1077,1080                               | Bg2;2.1,1079(14) | 10-Feb-08 | 5.85                                                   | 20.15           |
| DJ694;2.1,1079(13)                            | Bg2;1077,1080    | 10-Feb-08 | 0.58                                                   | 2.00            |
| DJ694;2.1,1079(13)                            | Bg2;1077,1080    | 10-Feb-08 | 0.47                                                   | 1.62            |
| DJ694;2.1,1079(13)                            | Bg2;1077,1080    | 10-Feb-08 | 0.41                                                   | 1.40            |
| DJ694;2.1,1079(14)                            | Bg2;1077,1080    | 10-Feb-08 | 1.12                                                   | 3.85            |
| DJ694;2.1,1079(14)                            | Bg2;1077,1080    | 10-Feb-08 | 2.61                                                   | 8.99            |
| DJ694;2.1,1079(14)                            | Bg2;1077,1080    | 10-Feb-08 | 1.16                                                   | 4.01            |
| <b>DJ694 + 3.3 + 2 copies DJ1077 + DJ1080</b> |                  |           |                                                        |                 |
| DJ694;1077,1080                               | Bg2;3.3,1077     | 10-Feb-08 | 3.05                                                   | 10.51           |
| DJ694;1077,1080                               | Bg2;3.3,1077     | 10-Feb-08 | 3.12                                                   | 10.75           |
| DJ694;1077,1080                               | Bg2;3.3,1077     | 10-Feb-08 | 3.75                                                   | 12.91           |
| DJ694;3.3,1077                                | Bg2;1077,1080    | 10-Feb-08 | 1.48                                                   | 5.09            |
| DJ694;3.3,1077                                | Bg2;1077,1080    | 10-Feb-08 | 1.20                                                   | 4.15            |
| DJ694;3.3,1077                                | Bg2;1077,1080    | 10-Feb-08 | 1.25                                                   | 4.31            |
| <b>DJ694 + 3.3 + DJ1077 + DJ1079 + DJ1080</b> |                  |           |                                                        |                 |
| DJ694;1077,1080                               | Bg2;3.3,1079     | 10-Feb-08 | 1.23                                                   | 4.22            |
| DJ694;1077,1080                               | Bg2;3.3,1079     | 10-Feb-08 | 4.76                                                   | 16.40           |
| DJ694;1077,1080                               | Bg2;3.3,1079     | 10-Feb-08 | 3.49                                                   | 12.01           |
| <b>DJ694 + 2.1 + 2 copies DJ1077 + DJ1080</b> |                  |           |                                                        |                 |
| DJ694;2.1,1077                                | Bg2;1077,1080    | 10-Feb-08 | 2.38                                                   | 8.20            |
| DJ694;2.1,1077                                | Bg2;1077,1080    | 10-Feb-08 | 0.84                                                   | 2.89            |
| DJ694;2.1,1077                                | Bg2;1077,1080    | 10-Feb-08 | 0.65                                                   | 2.24            |
| <b>DJ694 + 2.1 + DJ1077 + DJ1080 + DJ1083</b> |                  |           |                                                        |                 |
| DJ694;2.1,1077                                | Bg2;1080,1083    | 10-Feb-08 | 1.97                                                   | 6.80            |
| DJ694;2.1,1077                                | Bg2;1080,1083    | 10-Feb-08 | 4.21                                                   | 14.51           |
| DJ694;2.1,1077                                | Bg2;1080,1083    | 10-Feb-08 | 3.60                                                   | 12.42           |
| <b>DJ694 + 2.1 + DJ1079 + DJ1080 + DJ1083</b> |                  |           |                                                        |                 |

Late pupae

| <b>Parents</b>                                |               | <b>Date</b> | <b>Specific activity<br/><math>\Delta</math>mOD/min/<math>\mu</math>g protein</b> | <b>% DJ694 control</b> |
|-----------------------------------------------|---------------|-------------|-----------------------------------------------------------------------------------|------------------------|
| <b>Male</b>                                   | <b>Female</b> |             |                                                                                   |                        |
| DJ694;2.1,1079(13)                            | Bg2;1080,1083 | 10-Feb-08   | 1.19                                                                              | <b>4.10</b>            |
| DJ694;2.1,1079(13)                            | Bg2;1080,1083 | 10-Feb-08   | 1.12                                                                              | <b>3.87</b>            |
| DJ694;2.1,1079(13)                            | Bg2;1080,1083 | 10-Feb-08   | 0.81                                                                              | <b>2.79</b>            |
| DJ694;2.1,1079(14)                            | Bg2;1080,1083 | 10-Feb-08   | 1.46                                                                              | <b>5.04</b>            |
| DJ694;2.1,1079(14)                            | Bg2;1080,1083 | 10-Feb-08   | 1.75                                                                              | <b>6.03</b>            |
| DJ694;2.1,1079(14)                            | Bg2;1080,1083 | 10-Feb-08   | 1.55                                                                              | <b>5.35</b>            |
| <b>DJ694 + 3.3 + DJ1077 + DJ1080 + DJ1083</b> |               |             |                                                                                   |                        |
| DJ694;3.3,1077                                | Bg2;1080,1083 | 10-Feb-08   | 1.45                                                                              | <b>4.99</b>            |
| DJ694;3.3,1077                                | Bg2;1080,1083 | 10-Feb-08   | 1.72                                                                              | <b>5.94</b>            |
| DJ694;3.3,1077                                | Bg2;1080,1083 | 10-Feb-08   | 1.34                                                                              | <b>4.62</b>            |

*Supplemental Table 8: UAS-lacZ assay statistical analysis (t-tests).*

|                                | L1         | L3         | EP         | LP         |
|--------------------------------|------------|------------|------------|------------|
| <b>1 copy 146 compared to:</b> |            |            |            |            |
| 2 copy 146                     | 0.07009452 | 0.10739306 | 0.34418726 | 0.09753996 |
| 3 copy 146                     | 4.6455E-19 | 0.00299309 | 9.4825E-17 | 1.0518E-06 |
| 4 copy 146                     | 2.9076E-17 | 1.6604E-11 | 1.4828E-14 | 0.0596847  |
| 1 copy 147                     | 0.32952063 | 0.03752734 | 8.3178E-05 | 0.35191187 |
| 2 copy 147                     | 0.00863281 | 0.00040376 | 0.67111125 | 0.03671816 |
| 3 copy 147                     | 1.6585E-06 | 0.00280185 | 0.85102789 | 0.00149374 |
| 1 copy 146 + 1 copy 147        | 2.9931E-09 | 4.4585E-11 | 2.6056E-09 | 0.0002597  |
| 2 copy 146 + 1 copy 147        | 4.2565E-23 | 0.01315022 | 6.9832E-18 | 3.1082E-16 |
| 1 copy 146 + 2 copy 147        | 1.2546E-10 | 0.00056488 | 1.6271E-13 | 3.6108E-17 |
| 2 copy 146 + 2 copy 147        | 3.4105E-48 | 5.0396E-39 | 8.6409E-61 | 2.23E-63   |
| 3 copy 146 + 1 copy 147        | 7.2153E-26 | 6.7846E-23 | 4.6195E-28 | 1.2061E-24 |
| <b>2 copy 146 compared to:</b> |            |            |            |            |
| 3 copy 146                     | 7.1657E-09 | 4.6915E-06 | 3.2099E-12 | 6.6773E-11 |
| 4 copy 146                     | 4.0231E-08 | 2.8557E-12 | 2.0745E-11 | 0.00040294 |
| 1 copy 147                     | 0.01234006 | 0.73902451 | 3.2102E-05 | 0.41341207 |
| 2 copy 147                     | 0.45744807 | 0.0167807  | 0.84181842 | 0.4531964  |
| 3 copy 147                     | 0.05051782 | 0.0240573  | 0.52180499 | 1.3538E-05 |
| 1 copy 146 + 1 copy 147        | 0.00022545 | 3.5655E-13 | 1.7123E-07 | 4.8933E-08 |
| 2 copy 146 + 1 copy 147        | 7.6965E-11 | 2.8247E-05 | 6.5125E-15 | 4.85E-21   |
| 1 copy 146 + 2 copy 147        | 0.00030284 | 2.237E-06  | 5.0833E-10 | 2.0492E-19 |
| 2 copy 146 + 2 copy 147        | 9.9955E-33 | 1.6013E-57 | 3.2725E-61 | 4.2773E-87 |
| 3 copy 146 + 1 copy 147        | 1.2209E-13 | 1.1666E-23 | 6.6905E-23 | 3.2349E-28 |
| <b>3 copy 146 compared to:</b> |            |            |            |            |
| 4 copy 146                     | 0.81325587 | 0.00030482 | 0.04852396 | 0.00189258 |
| 1 copy 147                     | 3.6801E-18 | 3.3303E-06 | 8.03E-28   | 1.5244E-09 |
| 2 copy 147                     | 3.5016E-13 | 2.4906E-06 | 1.7638E-08 | 2.9546E-10 |
| 3 copy 147                     | 1.4596E-14 | 1.9257E-07 | 9.642E-12  | 0.51507179 |
| 1 copy 146 + 1 copy 147        | 5.0394E-05 | 0.00475991 | 0.07252262 | 0.66472621 |
| 2 copy 146 + 1 copy 147        | 0.26930174 | 0.69334129 | 0.09854234 | 1.2274E-11 |
| 1 copy 146 + 2 copy 147        | 2.4569E-07 | 0.52554701 | 0.90303297 | 1.6366E-18 |
| 2 copy 146 + 2 copy 147        | 0.45176244 | 6.7247E-20 | 2.9975E-14 | 4.8574E-53 |
| 3 copy 146 + 1 copy 147        | 0.98055004 | 6.0319E-11 | 3.379E-10  | 1.4256E-24 |
| <b>4 copy 146 compared to:</b> |            |            |            |            |
| 1 copy 147                     | 1.6902E-16 | 2.3785E-14 | 8.5839E-23 | 0.00349934 |
| 2 copy 147                     | 8.5856E-11 | 5.1036E-12 | 2.7773E-07 | 0.00032519 |
| 3 copy 147                     | 1.2326E-12 | 7.9843E-10 | 1.7117E-10 | 0.07397915 |
| 1 copy 146 + 1 copy 147        | 0.00012147 | 0.01479651 | 0.00459995 | 0.01717501 |
| 2 copy 146 + 1 copy 147        | 0.26963059 | 0.00023312 | 0.6823459  | 9.8385E-14 |
| 1 copy 146 + 2 copy 147        | 1.4739E-06 | 0.00230957 | 0.10956928 | 1.3217E-16 |
| 2 copy 146 + 2 copy 147        | 0.42723063 | 0.13858641 | 4.94E-05   | 1.0122E-55 |

|                                             |            |            |            |            |
|---------------------------------------------|------------|------------|------------|------------|
| 3 copy 146 + 1 copy 147                     | 0.92776288 | 0.00027873 | 0.00072429 | 3.2476E-23 |
| <b>1 copy 147 compared to:</b>              |            |            |            |            |
| 2 copy 147                                  | 0.00473671 | 0.01568184 | 0.00172565 | 0.11259027 |
| 3 copy 147                                  | 5.9372E-07 | 0.06222065 | 0.00144373 | 4.2483E-05 |
| 1 copy 146 + 1 copy 147                     | 1.9962E-10 | 2.429E-15  | 3.5761E-17 | 7.678E-06  |
| 2 copy 146 + 1 copy 147                     | 3.0595E-22 | 3.0321E-05 | 4.8528E-28 | 1.5179E-19 |
| 1 copy 146 + 2 copy 147                     | 5.3858E-11 | 8.6368E-07 | 1.6669E-22 | 5.4275E-20 |
| 2 copy 146 + 2 copy 147                     | 2.1261E-53 | 6.42E-55   | 8.0643E-89 | 2.0556E-73 |
| 3 copy 146 + 1 copy 147                     | 8.6345E-26 | 7.0678E-27 | 3.2865E-40 | 1.2688E-28 |
| <b>2 copy 147 compared to:</b>              |            |            |            |            |
| 3 copy 147                                  | 0.29119495 | 0.71474846 | 0.84426375 | 4.962E-06  |
| 1 copy 146 + 1 copy 147                     | 0.11936543 | 6.8958E-14 | 0.00072283 | 7.4976E-05 |
| 2 copy 146 + 1 copy 147                     | 1.0584E-13 | 1.4218E-05 | 3.6185E-08 | 3.4694E-17 |
| 1 copy 146 + 2 copy 147                     | 0.01054415 | 1.8137E-06 | 1.1094E-06 | 5.7321E-22 |
| 2 copy 146 + 2 copy 147                     | 3.0905E-08 | 1.6365E-42 | 1.9428E-23 | 5.6081E-52 |
| 3 copy 146 + 1 copy 147                     | 7.5198E-10 | 1.3268E-22 | 1.284E-15  | 2.9619E-29 |
| <b>3 copy 147 compared to:</b>              |            |            |            |            |
| 1 copy 146 + 1 copy 147                     | 0.13933676 | 1.2413E-11 | 4.298E-07  | 0.49275503 |
| 2 copy 146 + 1 copy 147                     | 6.6598E-16 | 4.3376E-07 | 1.4387E-13 | 2.8494E-08 |
| 1 copy 146 + 2 copy 147                     | 0.01109755 | 6.609E-07  | 1.5795E-09 | 3.0288E-13 |
| 2 copy 146 + 2 copy 147                     | 4.7957E-13 | 1.8203E-55 | 9.428E-52  | 6.4547E-34 |
| 3 copy 146 + 1 copy 147                     | 1.3336E-13 | 1.6916E-18 | 7.7168E-21 | 1.0222E-17 |
| <b>1 copy 146 + 1 copy 147 compared to:</b> |            |            |            |            |
| 2 copy 146 + 1 copy 147                     | 1.0799E-05 | 0.002266   | 0.0028108  | 1.7684E-05 |
| 1 copy 146 + 2 copy 147                     | 0.63026461 | 0.04068154 | 0.10060908 | 5.5346E-08 |
| 2 copy 146 + 2 copy 147                     | 1.972E-10  | 2.6921E-07 | 7.6157E-21 | 2.3567E-33 |
| 3 copy 146 + 1 copy 147                     | 5.3612E-07 | 1.2909E-10 | 5.5185E-10 | 2.9372E-11 |
| <b>2 copy 146 + 1 copy 147 compared to:</b> |            |            |            |            |
| 1 copy 146 + 2 copy 147                     | 7.9679E-08 | 0.33360573 | 0.18568044 | 4.9253E-05 |
| 2 copy 146 + 2 copy 147                     | 0.71984686 | 1.3848E-22 | 1.3371E-08 | 1.8162E-11 |
| 3 copy 146 + 1 copy 147                     | 0.5020725  | 6.8156E-11 | 3.4079E-05 | 9.0616E-06 |
| <b>1 copy 146 + 2 copy 147 compared to:</b> |            |            |            |            |
| 2 copy 146 + 2 copy 147                     | 8.4526E-07 | 4.5666E-13 | 5.4463E-11 | 0.8735066  |
| 3 copy 146 + 1 copy 147                     | 1.3347E-07 | 3.8672E-09 | 7.3415E-08 | 0.48343005 |
| <b>2 copy 146 + 2 copy 147 compared to:</b> |            |            |            |            |
| 3 copy 146 + 1 copy 147                     | 0.30992956 | 0.00709331 | 0.86283639 | 0.29785406 |

**Supplemental Table 9.** Repression ability of 2x146 + 2x147 in adults fed through life. Significant p-values (>0.05) from comparison between experimental and negative or positive controls are bolded. Complete repression and total absence of repression result in insignificant difference with the negative control and positive control respectively.

| Age (days) | Tetracycline (µg/ml) | vs negative control |                | vs positive control |                |
|------------|----------------------|---------------------|----------------|---------------------|----------------|
|            |                      | ♂                   | ♀              | ♂                   | ♀              |
| 2          | 0                    | <b>1.5E-06</b>      | <b>1.1E-08</b> | <b>1.8E-07</b>      | <b>3.7E-06</b> |
|            | 1                    | <b>3.8E-06</b>      | <b>1.1E-07</b> | <b>1.9E-09</b>      | <b>5.2E-09</b> |
|            | 10                   | <b>2.4E-05</b>      | <b>3.4E-07</b> | <b>1.5E-08</b>      | <b>1.4E-08</b> |
|            | 100                  | <b>4.2E-06</b>      | <b>7.7E-06</b> | <b>3.7E-07</b>      | <b>6.0E-06</b> |
| 5          | 0                    | <b>9.0E-05</b>      | <b>2.6E-04</b> | <b>7.7E-10</b>      | <b>1.2E-05</b> |
|            | 1                    | <b>8.5E-05</b>      | <b>7.3E-05</b> | <b>5.6E-09</b>      | <b>2.7E-04</b> |
|            | 10                   | <b>3.5E-06</b>      | <b>2.2E-07</b> | <b>9.1E-07</b>      | <b>8.0E-07</b> |
|            | 100                  | <b>6.8E-05</b>      | <b>8.7E-06</b> | <b>1.4E-05</b>      | <b>2.0E-05</b> |
| 10         | 0                    | <b>5.2E-06</b>      | <b>2.4E-07</b> | <b>3.2E-12</b>      | <b>8.0E-08</b> |
|            | 1                    | <b>5.4E-06</b>      | <b>2.9E-07</b> | <b>5.9E-07</b>      | <b>4.3E-03</b> |
|            | 10                   | <b>4.0E-04</b>      | <b>1.5E-06</b> | <b>1.8E-05</b>      | <b>4.3E-04</b> |
|            | 100                  | <b>6.8E-08</b>      | <b>3.3E-09</b> | <b>1.5E-06</b>      | <b>6.1E-04</b> |
| 20         | 0                    | <b>3.0E-05</b>      | <b>2.0E-04</b> | <b>9.6E-08</b>      | <b>3.9E-05</b> |
|            | 1                    | <b>2.0E-06</b>      | <b>2.3E-03</b> | <b>6.3E-04</b>      | 0.86           |
|            | 10                   | <b>1.2E-04</b>      | <b>4.1E-04</b> | 0.11                | 0.53           |
|            | 100                  | <b>1.7E-08</b>      | <b>1.4E-04</b> | 0.52                | 0.14           |
| 30         | 0                    | <b>0.02</b>         | <b>6.8E-03</b> | <b>2.3E-04</b>      | <b>4.3E-04</b> |
|            | 1                    | <b>1.2E-04</b>      | <b>4.5E-05</b> | <b>7.8E-03</b>      | <b>3.1E-04</b> |
|            | 10                   | <b>3.6E-04</b>      | <b>5.3E-04</b> | <b>2.2E-03</b>      | <b>0.02</b>    |
|            | 100                  | <b>4.7E-04</b>      | <b>3.2E-03</b> | 0.70                | 0.82           |
| 40         | 0                    | <b>1.3E-05</b>      | <b>1.8E-03</b> | <b>9.7E-04</b>      | <b>7.6E-03</b> |
|            | 1                    | <b>7.4E-04</b>      | <b>2.5E-05</b> | <b>6.2E-05</b>      | <b>2.9E-04</b> |
|            | 10                   | <b>7.9E-04</b>      | <b>2.5E-03</b> | <b>1.4E-03</b>      | <b>1.8E-03</b> |
|            | 100                  | <b>2.5E-03</b>      | <b>3.7E-03</b> | <b>4.2E-03</b>      | 0.07           |



**Supplemental Table 10.** Induction abilities of 2x146 + 2x147 in adults fed through life. Significant p-values (<0.05) are bolded. Comparisons and grouping as described in Poirier et al, 2008.

|                                   | Compared to         | Tetracycline<br>( $\mu\text{g/ml}$ ) | P values          |                |                |                |             |      |
|-----------------------------------|---------------------|--------------------------------------|-------------------|----------------|----------------|----------------|-------------|------|
|                                   |                     |                                      | Days of induction |                |                |                |             |      |
|                                   |                     |                                      | 2                 | 5              | 10             | 20             | 30          | 40   |
| Males                             | 0 $\mu\text{g/ml}$  | 1                                    | 0.13              | <b>2.2E-03</b> | <b>1.1E-05</b> | <b>3.4E-06</b> | 0.06        | 0.18 |
|                                   |                     | 10                                   | 0.56              | <b>1.9E-05</b> | <b>6.5E-04</b> | <b>1.8E-04</b> | 0.07        | 0.15 |
|                                   |                     | 100                                  | 0.39              | <b>4.2E-04</b> | <b>1.2E-07</b> | <b>2.6E-08</b> | <b>0.01</b> | 0.97 |
|                                   | 1 $\mu\text{g/ml}$  | 10                                   | 0.43              | <b>2.1E-03</b> | 0.45           | 0.76           | 0.92        | 0.93 |
|                                   |                     | 100                                  | 0.50              | <b>0.04</b>    | <b>0.02</b>    | <b>0.02</b>    | 0.12        | 0.35 |
|                                   | 10 $\mu\text{g/ml}$ | 100                                  | 0.86              | 0.25           | 0.41           | 0.17           | 0.16        | 0.32 |
| Females                           | 0 $\mu\text{g/ml}$  | 1                                    | 3.8E-04           | <b>9.4E-03</b> | <b>3.0E-06</b> | <b>0.01</b>    | <b>0.02</b> | 0.66 |
|                                   |                     | 10                                   | 0.28              | <b>4.4E-04</b> | <b>3.1E-05</b> | <b>2.2E-03</b> | <b>0.04</b> | 0.70 |
|                                   |                     | 100                                  | 0.93              | <b>8.7E-04</b> | <b>2.8E-07</b> | <b>3.7E-03</b> | 0.06        | 0.94 |
|                                   | 1 $\mu\text{g/ml}$  | 10                                   | <b>8.2E-03</b>    | 0.74           | 0.04           | 0.77           | 0.87        | 0.96 |
|                                   |                     | 100                                  | <b>0.01</b>       | 0.27           | 3.2E-03        | 0.21           | 0.61        | 0.76 |
|                                   | 10 $\mu\text{g/ml}$ | 100                                  | 0.44              | 0.27           | 0.38           | 0.08           | 0.72        | 0.77 |
| Number of inducing concentrations |                     | Different levels of induction        | Grouping          |                |                |                |             |      |
| 3                                 | 3                   |                                      |                   |                |                |                |             |      |
|                                   | 2                   |                                      | ♂                 | ♂              | ♂              |                |             |      |
|                                   | 1                   |                                      | ♀                 | ♀              | ♀              |                |             |      |
| 2                                 | 2                   |                                      |                   |                |                |                |             |      |
|                                   | 1                   |                                      |                   |                |                | ♀              |             |      |
| 1                                 | 1                   |                                      |                   |                |                | ♂              |             |      |
| None                              | 0                   | ♂ ♀                                  |                   |                |                |                | ♂ ♀         |      |

**Supplemental Table 11.** Repression ability of 2x146 + 2x147 in adults fed starting at 20 days old. Significant p-values (>0.05) from comparison between experimental and negative or positive controls are bolded. Complete repression and total absence of repression result in insignificant difference with the negative control and positive control respectively.

| Induction length (days) | Tetracycline ( $\mu\text{g/ml}$ ) | vs negative control |                | vs positive control |                |
|-------------------------|-----------------------------------|---------------------|----------------|---------------------|----------------|
|                         |                                   | ♂                   | ♀              | ♂                   | ♀              |
| 2                       | 0                                 | <b>1.8E-07</b>      | <b>9.7E-09</b> | <b>8.0E-07</b>      | <b>1.6E-06</b> |
|                         | 1                                 | <b>1.0E-03</b>      | <b>1.0E-05</b> | <b>6.7E-09</b>      | <b>8.3E-05</b> |
|                         | 100                               | <b>2.3E-06</b>      | <b>2.9E-05</b> | <b>1.2E-05</b>      | <b>1.1E-06</b> |
| 5                       | 0                                 | <b>1.6E-07</b>      | <b>0.01</b>    | <b>1.6E-12</b>      | <b>1.0E-03</b> |
|                         | 1                                 | <b>5.0E-04</b>      | <b>3.7E-04</b> | <b>1.5E-05</b>      | <b>6.4E-05</b> |
|                         | 100                               | <b>1.6E-04</b>      | <b>1.3E-04</b> | <b>6.1E-03</b>      | <b>4.7E-04</b> |
| 10                      | 0                                 | <b>5.3E-04</b>      | <b>1.9E-03</b> | <b>3.6E-04</b>      | <b>9.7E-03</b> |
|                         | 1                                 | <b>1.3E-03</b>      | <b>3.0E-04</b> | <b>6.4E-05</b>      | <b>1.9E-03</b> |
|                         | 100                               | <b>3.8E-03</b>      | <b>3.1E-05</b> | <b>1.8E-04</b>      | <b>8.3E-04</b> |
| 20                      | 0                                 | <b>4.5E-04</b>      | <b>2.6E-06</b> | <b>1.4E-04</b>      | <b>1.0E-07</b> |
|                         | 1                                 | <b>6.8E-05</b>      | <b>5.0E-06</b> | <b>5.4E-03</b>      | <b>0.03</b>    |
|                         | 100                               | <b>1.8E-03</b>      | <b>1.9E-04</b> | <b>4.9E-06</b>      | <b>0.02</b>    |

**Supplemental Table 12.** Induction abilities of 2x146 + 2x147 in adults fed starting at 20 days old. Significant p-values (<0.05) are bolded. Comparisons and grouping as described in Poirier et al, 2008.

|                                   | Compared to        | Tetracycline<br>( $\mu\text{g/ml}$ ) | P values          |             |             |                |
|-----------------------------------|--------------------|--------------------------------------|-------------------|-------------|-------------|----------------|
|                                   |                    |                                      | Days of induction |             |             |                |
|                                   |                    |                                      | 2                 | 5           | 10          | 20             |
| Males                             | 0 $\mu\text{g/ml}$ | 1                                    | 0.76              | <b>0.02</b> | 0.06        | <b>8.4E-03</b> |
|                                   |                    | 100                                  | 0.28              | <b>0.01</b> | 0.15        | 0.71           |
|                                   | 1 $\mu\text{g/ml}$ | 100                                  | 0.82              | 0.82        | 0.74        | <b>6.6E-03</b> |
| Females                           | 0 $\mu\text{g/ml}$ | 1                                    | 0.18              | 0.20        | 0.40        | <b>2.0E-04</b> |
|                                   |                    | 100                                  | 0.63              | 0.13        | <b>0.04</b> | <b>0.01</b>    |
|                                   | 1 $\mu\text{g/ml}$ | 100                                  | 0.50              | 0.82        | 0.14        | 0.16           |
| Number of inducing concentrations |                    | Different levels of induction        | Grouping          |             |             |                |
| 2                                 |                    | 2                                    |                   |             |             |                |
|                                   |                    | 1                                    |                   | ♂           |             | ♀              |
| 1                                 |                    | 1                                    |                   |             | ♀           | ♂              |
| None                              |                    | 0                                    | ♂ ♀               | ♀           | ♂           |                |

*Supplemental Table 13: GAL4 driver survey data set.*

?: percentage of individuals remaining from previous stage; Plate#. Exp#: plate number and experiment number; SD: standard deviation.

| 1 of 17                        | Parents             | Plate #. | %L1   | SD   | %P    | SD   | %A    | SD      | %L1   | SD   | %P    | SD   | %A    | SD  |
|--------------------------------|---------------------|----------|-------|------|-------|------|-------|---------|-------|------|-------|------|-------|-----|
| Male                           | Female              | Exp #    | AMP   |      |       |      |       | AMP/TET |       |      |       |      |       |     |
| <b>da-GAL4 + 0 GAL80</b>       |                     |          |       |      |       |      |       |         |       |      |       |      |       |     |
| da-GAL4                        | UAS-grim            | 1.1      | 0.0   |      | 0.0   |      | 0.0   |         | 0.0   |      | 0.0   |      | 0.0   |     |
|                                |                     | 2.1      | 0.0   |      | 0.0   |      | 0.0   |         | 0.0   |      | 0.0   |      | 0.0   |     |
|                                |                     | 3.1      | 0.0   |      | 0.0   |      | 0.0   |         | 0.0   |      | 0.0   |      | 0.0   |     |
|                                |                     | 4.1      | 0.0   |      | 0.0   |      | 0.0   |         | 0.0   |      | 0.0   |      | 0.0   |     |
|                                |                     | 1.2      | 0.0   |      | 0.0   |      | 0.0   |         | 0.0   |      | 0.0   |      | 0.0   |     |
|                                |                     | 2.2      | 0.0   |      | 0.0   |      | 0.0   |         | 0.0   |      | 0.0   |      | 0.0   |     |
|                                |                     | 3.2      | 0.0   |      | 0.0   |      | 0.0   |         | 0.0   |      | 0.0   |      | 0.0   |     |
|                                |                     | 4.2      | 0.0   |      | 0.0   |      | 0.0   |         | 0.0   |      | 0.0   |      | 0.0   |     |
|                                |                     |          | 0.0   | 0.0  | 0.0   | 0.0  | 0.0   | 0.0     | 0.0   | 0.0  | 0.0   | 0.0  | 0.0   | 0.0 |
| <b>0 GAL80</b>                 |                     |          |       |      |       |      |       |         |       |      |       |      |       |     |
| da-GAL4                        | w                   | 1.1      | 96.0  |      | 66.7  |      | 93.8  |         | 88.0  |      | 54.6  |      | 91.7  |     |
|                                |                     | 2.1      | 96.0  |      | 70.9  |      | 100.0 |         | 84.0  |      | 71.5  |      | 93.4  |     |
|                                |                     | 3.1      | 92.0  |      | 69.6  |      | 100.0 |         | 64.0  |      | 100.0 |      | 100.0 |     |
|                                |                     | 4.1      | 64.0  |      | 68.8  |      | 91.0  |         | 60.0  |      | 46.7  |      | 85.8  |     |
|                                |                     | 1.2      | 96.0  |      | 79.2  |      | 94.8  |         | 96.0  |      | 75.0  |      | 100.0 |     |
|                                |                     | 2.2      | 88.0  |      | 77.3  |      | 88.3  |         | 100.0 |      | 92.0  |      | 100.0 |     |
|                                |                     | 3.2      | 100.0 |      | 84.0  |      | 100.0 |         | 100.0 |      | 96.0  |      | 100.0 |     |
|                                |                     | 4.2      | 100.0 |      | 92.0  |      | 100.0 |         | 92.0  |      | 87.0  |      | 100.0 |     |
|                                |                     |          | 91.5  | 11.8 | 76.1  | 8.8  | 96.0  | 4.7     | 85.5  | 15.6 | 77.9  | 19.5 | 96.4  | 5.5 |
| <b>da-GAL4 + DJ1077</b>        |                     |          |       |      |       |      |       |         |       |      |       |      |       |     |
| da-GAL4                        | UAS-grim;DJ1077     | 1.1      | 0.0   |      | 0.0   |      | 0.0   |         | 0.0   |      | 0.0   |      | 0.0   |     |
|                                |                     | 2.1      | 0.0   |      | 0.0   |      | 0.0   |         | 0.0   |      | 0.0   |      | 0.0   |     |
|                                |                     | 3.1      | 0.0   |      | 0.0   |      | 0.0   |         | 0.0   |      | 0.0   |      | 0.0   |     |
|                                |                     | 4.1      | 0.0   |      | 0.0   |      | 0.0   |         | 0.0   |      | 0.0   |      | 0.0   |     |
|                                |                     |          | 0.0   | 0.0  | 0.0   | 0.0  | 0.0   | 0.0     | 0.0   | 0.0  | 0.0   | 0.0  | 0.0   | 0.0 |
| <b>da-GAL4 + 3.3</b>           |                     |          |       |      |       |      |       |         |       |      |       |      |       |     |
| da-GAL4                        | UAS-grim;3.3        | 1.1      | 0.0   |      | 0.0   |      | 0.0   |         | 0.0   |      | 0.0   |      | 0.0   |     |
|                                |                     | 2.1      | 0.0   |      | 0.0   |      | 0.0   |         | 0.0   |      | 0.0   |      | 0.0   |     |
|                                |                     | 3.1      | 0.0   |      | 0.0   |      | 0.0   |         | 0.0   |      | 0.0   |      | 0.0   |     |
|                                |                     | 4.1      | 0.0   |      | 0.0   |      | 0.0   |         | 0.0   |      | 0.0   |      | 0.0   |     |
|                                |                     |          | 0.0   | 0.0  | 0.0   | 0.0  | 0.0   | 0.0     | 0.0   | 0.0  | 0.0   | 0.0  | 0.0   | 0.0 |
| <b>da-GAL4 + 1X146 + 1X147</b> |                     |          |       |      |       |      |       |         |       |      |       |      |       |     |
| da-GAL4                        | UAS-grim;2.1+DJ1077 | 1.1      | 0.0   |      | 0.0   |      | 0.0   |         | 0.0   |      | 0.0   |      | 0.0   |     |
|                                |                     | 2.1      | 0.0   |      | 0.0   |      | 0.0   |         | 0.0   |      | 0.0   |      | 0.0   |     |
|                                |                     | 3.1      | 0.0   |      | 0.0   |      | 0.0   |         | 0.0   |      | 0.0   |      | 0.0   |     |
|                                |                     | 4.1      | 0.0   |      | 0.0   |      | 0.0   |         | 0.0   |      | 0.0   |      | 0.0   |     |
| da-GAL4                        | UAS-grim;2.1+DJ1079 | 1.2      | 0.0   |      | 0.0   |      | 0.0   |         | 0.0   |      | 0.0   |      | 0.0   |     |
|                                |                     | 2.2      | 0.0   |      | 0.0   |      | 0.0   |         | 0.0   |      | 0.0   |      | 0.0   |     |
|                                |                     | 3.2      | 0.0   |      | 0.0   |      | 0.0   |         | 0.0   |      | 0.0   |      | 0.0   |     |
|                                |                     | 4.2      | 0.0   |      | 0.0   |      | 0.0   |         | 0.0   |      | 0.0   |      | 0.0   |     |
|                                |                     |          | 0.0   | 0.0  | 0.0   | 0.0  | 0.0   | 0.0     | 0.0   | 0.0  | 0.0   | 0.0  | 0.0   | 0.0 |
| <b>tubGAL4 + 0 GAL80</b>       |                     |          |       |      |       |      |       |         |       |      |       |      |       |     |
| tubGAL4                        | UAS-grim            | 1.1      | 0.0   |      | 0.0   |      | 0.0   |         | 0.0   |      | 0.0   |      | 0.0   |     |
|                                |                     | 2.1      | 0.0   |      | 0.0   |      | 0.0   |         | 0.0   |      | 0.0   |      | 0.0   |     |
|                                |                     | 3.1      | 0.0   |      | 0.0   |      | 0.0   |         | 0.0   |      | 0.0   |      | 0.0   |     |
|                                |                     | 4.1      | 0.0   |      | 0.0   |      | 0.0   |         | 0.0   |      | 0.0   |      | 0.0   |     |
|                                |                     |          | 0.0   | 0.0  | 0.0   | 0.0  | 0.0   | 0.0     | 0.0   | 0.0  | 0.0   | 0.0  | 0.0   | 0.0 |
| <b>0 GAL80</b>                 |                     |          |       |      |       |      |       |         |       |      |       |      |       |     |
| tubGAL4                        | w                   | 1.1      | 92.0  |      | 91.4  |      | 100.0 |         | 100.0 |      | 96.0  |      | 95.9  |     |
|                                |                     | 2.1      | 100.0 |      | 92.0  |      | 95.7  |         | 96.0  |      | 83.4  |      | 100.0 |     |
|                                |                     | 3.1      | 100.0 |      | 72.0  |      | 94.5  |         | 92.0  |      | 91.4  |      | 100.0 |     |
|                                |                     | 4.1      | 96.0  |      | 95.9  |      | 95.7  |         | 96.0  |      | 100.0 |      | 100.0 |     |
|                                |                     | 1.2      | 100.0 |      | 100.0 |      | 100.0 |         | 96.0  |      | 100.0 |      | 95.9  |     |
|                                |                     | 2.2      | 100.0 |      | 92.0  |      | 95.7  |         | 96.0  |      | 95.9  |      | 100.0 |     |
|                                |                     | 3.2      | 100.0 |      | 84.0  |      | 100.0 |         | 92.0  |      | 95.7  |      | 100.0 |     |
|                                |                     | 4.2      | 100.0 |      | 84.0  |      | 100.0 |         | 84.0  |      | 85.8  |      | 100.0 |     |
|                                |                     |          | 97.0  | 3.8  | 87.8  | 10.7 | 96.5  | 2.4     | 96.0  | 3.3  | 92.7  | 7.1  | 99.0  | 2.1 |
| <b>tubGAL4 + DJ1077</b>        |                     |          |       |      |       |      |       |         |       |      |       |      |       |     |
| tubGAL4                        | UAS-grim;DJ1077     | 1.1      | 0.0   |      | 0.0   |      | 0.0   |         | 0.0   |      | 0.0   |      | 0.0   |     |
|                                |                     | 2.1      | 0.0   |      | 0.0   |      | 0.0   |         | 0.0   |      | 0.0   |      | 0.0   |     |
|                                |                     | 3.1      | 0.0   |      | 0.0   |      | 0.0   |         | 0.0   |      | 0.0   |      | 0.0   |     |
|                                |                     | 4.1      | 0.0   |      | 0.0   |      | 0.0   |         | 0.0   |      | 0.0   |      | 0.0   |     |
|                                |                     |          | 0.0   | 0.0  | 0.0   | 0.0  | 0.0   | 0.0     | 0.0   | 0.0  | 0.0   | 0.0  | 0.0   | 0.0 |

| 2 of 17                        | Parents             | Plate #. | %L1   | SD   | %P   | SD   | %A    | SD  | %L1     | SD  | %P    | SD  | %A    | SD  |
|--------------------------------|---------------------|----------|-------|------|------|------|-------|-----|---------|-----|-------|-----|-------|-----|
| Male                           | Female              | Exp #    | AMP   |      |      |      |       |     | AMP/TET |     |       |     |       |     |
| <b>tubGAL4 + 3.3</b>           |                     |          |       |      |      |      |       |     |         |     |       |     |       |     |
| tubGAL4                        | UAS-grim;3.3        | 1.1      | 0.0   |      | 0.0  |      | 0.0   |     | 0.0     |     | 0.0   |     | 0.0   |     |
|                                |                     | 2.1      | 0.0   |      | 0.0  |      | 0.0   |     | 0.0     |     | 0.0   |     | 0.0   |     |
|                                |                     | 3.1      | 0.0   |      | 0.0  |      | 0.0   |     | 0.0     |     | 0.0   |     | 0.0   |     |
|                                |                     | 4.1      | 0.0   |      | 0.0  |      | 0.0   |     | 0.0     |     | 0.0   |     | 0.0   |     |
|                                |                     |          | 0.0   | 0.0  | 0.0  | 0.0  | 0.0   | 0.0 | 0.0     | 0.0 | 0.0   | 0.0 | 0.0   | 0.0 |
| <b>tubGAL4 + 1X146 + 1X147</b> |                     |          |       |      |      |      |       |     |         |     |       |     |       |     |
| tubGAL4                        | UAS-grim;2.1+DJ1077 | 1.1      | 20.0  |      | 0.0  |      | 0.0   |     | 16.0    |     | 0.0   |     | 0.0   |     |
|                                |                     | 2.1      | 8.0   |      | 0.0  |      | 0.0   |     | 4.0     |     | 0.0   |     | 0.0   |     |
|                                |                     | 3.1      | 8.0   |      | 0.0  |      | 0.0   |     | 0.0     |     | 0.0   |     | 0.0   |     |
|                                |                     | 4.1      | 0.0   |      | 0.0  |      | 0.0   |     | 8.0     |     | 0.0   |     | 0.0   |     |
| tubGAL4                        | UAS-grim;2.1+DJ1079 | 1.2      | 12.0  |      | 0.0  |      | 0.0   |     | 8.0     |     | 0.0   |     | 0.0   |     |
|                                |                     | 2.2      | 4.0   |      | 0.0  |      | 0.0   |     | 8.0     |     | 0.0   |     | 0.0   |     |
|                                |                     | 3.2      | 0.0   |      | 0.0  |      | 0.0   |     | 8.0     |     | 0.0   |     | 0.0   |     |
|                                |                     | 4.2      | 4.0   |      | 0.0  |      | 0.0   |     | 8.0     |     | 0.0   |     | 0.0   |     |
|                                |                     |          | 7.0   | 6.7  | 0.0  | 0.0  | 0.0   | 0.0 | 7.5     | 4.5 | 0.0   | 0.0 | 0.0   | 0.0 |
| <b>DJ634 + 0 GAL80</b>         |                     |          |       |      |      |      |       |     |         |     |       |     |       |     |
| DJ634                          | UAS-grim            | 1.1      | 44.0  |      | 0.0  |      | 0.0   |     | 96.0    |     | 0.0   |     | 0.0   |     |
|                                |                     | 2.1      | 64.0  |      | 0.0  |      | 0.0   |     | 100.0   |     | 0.0   |     | 0.0   |     |
|                                |                     | 3.1      | 68.0  |      | 0.0  |      | 0.0   |     | 92.0    |     | 0.0   |     | 0.0   |     |
|                                |                     | 4.1      | 48.0  |      | 0.0  |      | 0.0   |     | 92.0    |     | 0.0   |     | 0.0   |     |
|                                |                     | 1.2      | 44.0  |      | 0.0  |      | 0.0   |     | 84.0    |     | 0.0   |     | 0.0   |     |
|                                |                     | 2.2      | 56.0  |      | 0.0  |      | 0.0   |     | 72.0    |     | 0.0   |     | 0.0   |     |
|                                |                     | 3.2      | 56.0  |      | 0.0  |      | 0.0   |     | 48.0    |     | 0.0   |     | 0.0   |     |
|                                |                     | 4.2      | 68.0  |      | 0.0  |      | 0.0   |     | 76.0    |     | 0.0   |     | 0.0   |     |
|                                |                     |          | 56.0  | 11.8 | 0.0  | 0.0  | 0.0   | 0.0 | 95.0    | 3.8 | 0.0   | 0.0 | 0.0   | 0.0 |
| <b>0 GAL80</b>                 |                     |          |       |      |      |      |       |     |         |     |       |     |       |     |
| DJ634                          | w                   | 1.1      | 92.0  |      | 69.6 |      | 100.0 |     | 92.0    |     | 100.0 |     | 100.0 |     |
|                                |                     | 2.1      | 92.0  |      | 60.9 |      | 100.0 |     | 96.0    |     | 95.9  |     | 95.7  |     |
|                                |                     | 3.1      | 92.0  |      | 65.3 |      | 100.0 |     | 100.0   |     | 92.0  |     | 100.0 |     |
|                                |                     | 4.1      | 92.0  |      | 91.4 |      | 100.0 |     | 96.0    |     | 91.7  |     | 100.0 |     |
|                                |                     | 1.2      | 96.0  |      | 79.2 |      | 94.8  |     | 92.0    |     | 100.0 |     | 100.0 |     |
|                                |                     | 2.2      | 92.0  |      | 87.0 |      | 95.0  |     | 92.0    |     | 100.0 |     | 95.7  |     |
|                                |                     | 3.2      | 100.0 |      | 96.0 |      | 100.0 |     | 100.0   |     | 88.0  |     | 100.0 |     |
|                                |                     | 4.2      | 100.0 |      | 96.0 |      | 100.0 |     | 96.0    |     | 95.9  |     | 100.0 |     |
|                                |                     |          | 92.0  | 0.0  | 71.8 | 13.5 | 100.0 | 0.0 | 96.0    | 3.3 | 94.9  | 3.9 | 98.9  | 2.2 |
| <b>DJ634 + DJ1077</b>          |                     |          |       |      |      |      |       |     |         |     |       |     |       |     |
| DJ634                          | UAS-grim;DJ1077     | 1.1      | 64.0  |      | 0.0  |      | 0.0   |     | 72.0    |     | 0.0   |     | 0.0   |     |
|                                |                     | 2.1      | 72.0  |      | 0.0  |      | 0.0   |     | 88.0    |     | 0.0   |     | 0.0   |     |
|                                |                     | 3.1      | 84.0  |      | 0.0  |      | 0.0   |     | 76.0    |     | 0.0   |     | 0.0   |     |
|                                |                     | 4.1      | 64.0  |      | 0.0  |      | 0.0   |     | 88.0    |     | 0.0   |     | 0.0   |     |
|                                |                     |          | 71.0  | 9.5  | 0.0  | 0.0  | 0.0   | 0.0 | 81.0    | 8.2 | 0.0   | 0.0 | 0.0   | 0.0 |
| <b>DJ634 + 3.3</b>             |                     |          |       |      |      |      |       |     |         |     |       |     |       |     |
| DJ634                          | UAS-grim;3.3        | 1.1      | 92.0  |      | 0.0  |      | 0.0   |     | 84.0    |     | 0.0   |     | 0.0   |     |
|                                |                     | 2.1      | 92.0  |      | 0.0  |      | 0.0   |     | 88.0    |     | 0.0   |     | 0.0   |     |
|                                |                     | 3.1      | 96.0  |      | 0.0  |      | 0.0   |     | 88.0    |     | 0.0   |     | 0.0   |     |
|                                |                     | 4.1      | 88.0  |      | 0.0  |      | 0.0   |     | 84.0    |     | 0.0   |     | 0.0   |     |
|                                |                     |          | 92.0  | 3.3  | 0.0  | 0.0  | 0.0   | 0.0 | 86.0    | 2.3 | 0.0   | 0.0 | 0.0   | 0.0 |
| <b>DJ634 + 1X146 + 1X147</b>   |                     |          |       |      |      |      |       |     |         |     |       |     |       |     |
| DJ634                          | UAS-grim;2.1+DJ1077 | 1.1      | 32.0  |      | 12.5 |      | 0.0   |     | 68.0    |     | 0.0   |     | 0.0   |     |
|                                |                     | 2.1      | 64.0  |      | 0.0  |      | 0.0   |     | 68.0    |     | 0.0   |     | 0.0   |     |
|                                |                     | 3.1      | 52.0  |      | 0.0  |      | 0.0   |     | 60.0    |     | 6.7   |     | 0.0   |     |
|                                |                     | 4.1      | 68.0  |      | 0.0  |      | 0.0   |     | 68.0    |     | 0.0   |     | 0.0   |     |
| DJ634                          | UAS-grim;2.1+DJ1079 | 1.2      | 52.0  |      | 7.7  |      | 0.0   |     | 80.0    |     | 0.0   |     | 0.0   |     |
|                                |                     | 2.2      | 56.0  |      | 14.3 |      | 0.0   |     | 56.0    |     | 0.0   |     | 0.0   |     |
|                                |                     | 3.2      | 68.0  |      | 0.0  |      | 0.0   |     | 72.0    |     | 0.0   |     | 0.0   |     |
|                                |                     | 4.2      | 52.0  |      | 23.1 |      | 0.0   |     | 80.0    |     | 0.0   |     | 0.0   |     |
|                                |                     |          | 55.5  | 11.8 | 7.2  | 8.8  | 0.0   | 0.0 | 69.0    | 8.5 | 0.8   | 2.4 | 0.0   | 0.0 |
| <b>D42 + 0 GAL80</b>           |                     |          |       |      |      |      |       |     |         |     |       |     |       |     |
| D42                            | UAS-grim            | 1.1      | 0.0   |      | 0.0  |      | 0.0   |     | 0.0     |     | 0.0   |     | 0.0   |     |
|                                |                     | 2.1      | 0.0   |      | 0.0  |      | 0.0   |     | 0.0     |     | 0.0   |     | 0.0   |     |
|                                |                     | 3.1      | 0.0   |      | 0.0  |      | 0.0   |     | 0.0     |     | 0.0   |     | 0.0   |     |
|                                |                     | 4.1      | 0.0   |      | 0.0  |      | 0.0   |     | 0.0     |     | 0.0   |     | 0.0   |     |
|                                |                     | 1.2      | 8.0   |      | 0.0  |      | 0.0   |     | 0.0     |     | 0.0   |     | 0.0   |     |
|                                |                     | 2.2      | 8.0   |      | 0.0  |      | 0.0   |     | 0.0     |     | 0.0   |     | 0.0   |     |
|                                |                     | 3.2      | 12.0  |      | 0.0  |      | 0.0   |     | 0.0     |     | 0.0   |     | 0.0   |     |
|                                |                     | 4.2      | 8.0   |      | 0.0  |      | 0.0   |     | 0.0     |     | 0.0   |     | 0.0   |     |
|                                |                     |          | 4.5   | 5.0  | 0.0  | 0.0  | 0.0   | 0.0 | 0.0     | 0.0 | 0.0   | 0.0 | 0.0   | 0.0 |

| 3 of 17 Parents            |                     | Plate #. | %L1   | SD   | %P    | SD   | %A    | SD      | %L1   | SD   | %P    | SD   | %A    | SD  |
|----------------------------|---------------------|----------|-------|------|-------|------|-------|---------|-------|------|-------|------|-------|-----|
| Male                       | Female              | Exp #    | AMP   |      |       |      |       | AMP/TET |       |      |       |      |       |     |
| <b>0 GAL80</b>             |                     |          |       |      |       |      |       |         |       |      |       |      |       |     |
| D42                        | w                   | 1.1      | 96.0  |      | 33.4  |      | 100.0 |         | 100.0 |      | 60.0  |      | 100.0 |     |
|                            |                     | 2.1      | 76.0  |      | 79.0  |      | 100.0 |         | 100.0 |      | 80.0  |      | 100.0 |     |
|                            |                     | 3.1      | 76.0  |      | 68.5  |      | 92.4  |         | 96.0  |      | 91.7  |      | 100.0 |     |
|                            |                     | 4.1      | 84.0  |      | 66.7  |      | 100.0 |         | 100.0 |      | 92.0  |      | 100.0 |     |
|                            |                     | 1.2      | 100.0 |      | 80.0  |      | 100.0 |         | 100.0 |      | 96.0  |      | 100.0 |     |
|                            |                     | 2.2      | 100.0 |      | 92.0  |      | 100.0 |         | 100.0 |      | 80.0  |      | 100.0 |     |
|                            |                     | 3.2      | 100.0 |      | 88.0  |      | 100.0 |         | 100.0 |      | 100.0 |      | 100.0 |     |
|                            |                     | 4.2      | 100.0 |      | 72.0  |      | 94.5  |         | 100.0 |      | 100.0 |      | 100.0 |     |
|                            |                     |          | 91.5  | 11.0 | 72.5  | 18.1 | 98.4  | 3.1     | 99.5  | 1.4  | 87.5  | 13.6 | 99.0  | 2.9 |
| <b>D42 + DJ1077</b>        |                     |          |       |      |       |      |       |         |       |      |       |      |       |     |
| D42                        | UAS-grim;DJ1077     | 1.1      | 8.0   |      | 0.0   |      | 0.0   |         | 52.0  |      | 0.0   |      | 0.0   |     |
|                            |                     | 2.1      | 20.0  |      | 0.0   |      | 0.0   |         | 60.0  |      | 0.0   |      | 0.0   |     |
|                            |                     | 3.1      | 24.0  |      | 0.0   |      | 0.0   |         | 60.0  |      | 0.0   |      | 0.0   |     |
|                            |                     | 4.1      | 40.0  |      | 0.0   |      | 0.0   |         | 60.0  |      | 0.0   |      | 0.0   |     |
|                            |                     |          | 23.0  | 13.2 | 0.0   | 0.0  | 0.0   | 0.0     | 58.0  | 4.0  | 0.0   | 0.0  | 0.0   | 0.0 |
| <b>D42 + 3.3</b>           |                     |          |       |      |       |      |       |         |       |      |       |      |       |     |
| D42                        | UAS-grim;3.3        | 1.1      | 0.0   |      | 0.0   |      | 0.0   |         | 0.0   |      | 0.0   |      | 0.0   |     |
|                            |                     | 2.1      | 0.0   |      | 0.0   |      | 0.0   |         | 0.0   |      | 0.0   |      | 0.0   |     |
|                            |                     | 3.1      | 0.0   |      | 0.0   |      | 0.0   |         | 0.0   |      | 0.0   |      | 0.0   |     |
|                            |                     | 4.1      | 0.0   |      | 0.0   |      | 0.0   |         | 0.0   |      | 0.0   |      | 0.0   |     |
|                            |                     |          | 0.0   | 0.0  | 0.0   | 0.0  | 0.0   | 0.0     | 0.0   | 0.0  | 0.0   | 0.0  | 0.0   | 0.0 |
| <b>D42 + 1X146 + 1X147</b> |                     |          |       |      |       |      |       |         |       |      |       |      |       |     |
| D42                        | UAS-grim;2.1+DJ1077 | 1.1      | 40.0  |      | 30.0  |      | 0.0   |         | 52.0  |      | 15.4  |      | 0.0   |     |
|                            |                     | 2.1      | 44.0  |      | 27.3  |      | 0.0   |         | 36.0  |      | 22.3  |      | 0.0   |     |
|                            |                     | 3.1      | 40.0  |      | 10.0  |      | 0.0   |         | 36.0  |      | 0.0   |      | 0.0   |     |
|                            |                     | 4.1      | 36.0  |      | 0.0   |      | 0.0   |         | 20.0  |      | 0.0   |      | 0.0   |     |
| D42                        | UAS-grim;2.1+DJ1079 | 1.2      | 40.0  |      | 40.0  |      | 0.0   |         | 52.0  |      | 7.7   |      | 0.0   |     |
|                            |                     | 2.2      | 56.0  |      | 42.9  |      | 0.0   |         | 84.0  |      | 9.6   |      | 0.0   |     |
|                            |                     | 3.2      | 56.0  |      | 21.5  |      | 0.0   |         | 64.0  |      | 6.3   |      | 0.0   |     |
|                            |                     | 4.2      | 48.0  |      | 16.7  |      | 0.0   |         | 48.0  |      | 8.4   |      | 0.0   |     |
|                            |                     |          | 45.0  | 7.6  | 23.6  | 14.6 | 0.0   | 0.0     | 49.0  | 19.4 | 8.7   | 7.5  | 0.0   | 0.0 |
| <b>24B + 0 GAL80</b>       |                     |          |       |      |       |      |       |         |       |      |       |      |       |     |
| 24B                        | UAS-grim            | 1.1      | 0.0   |      | 0.0   |      | 0.0   |         | 0.0   |      | 0.0   |      | 0.0   |     |
|                            |                     | 2.1      | 0.0   |      | 0.0   |      | 0.0   |         | 0.0   |      | 0.0   |      | 0.0   |     |
|                            |                     | 3.1      | 0.0   |      | 0.0   |      | 0.0   |         | 0.0   |      | 0.0   |      | 0.0   |     |
|                            |                     | 4.1      | 0.0   |      | 0.0   |      | 0.0   |         | 0.0   |      | 0.0   |      | 0.0   |     |
|                            |                     | 1.2      | 0.0   |      | 0.0   |      | 0.0   |         | 0.0   |      | 0.0   |      | 0.0   |     |
|                            |                     | 2.2      | 0.0   |      | 0.0   |      | 0.0   |         | 0.0   |      | 0.0   |      | 0.0   |     |
|                            |                     | 3.2      | 0.0   |      | 0.0   |      | 0.0   |         | 0.0   |      | 0.0   |      | 0.0   |     |
|                            |                     | 4.2      | 0.0   |      | 0.0   |      | 0.0   |         | 0.0   |      | 0.0   |      | 0.0   |     |
|                            |                     |          | 0.0   | 0.0  | 0.0   | 0.0  | 0.0   | 0.0     | 0.0   | 0.0  | 0.0   | 0.0  | 0.0   | 0.0 |
| <b>0 GAL80</b>             |                     |          |       |      |       |      |       |         |       |      |       |      |       |     |
| 24B                        | w                   | 1.1      | 100.0 |      | 92.0  |      | 100.0 |         | 96.0  |      | 100.0 |      | 100.0 |     |
|                            |                     | 2.1      | 100.0 |      | 84.0  |      | 95.3  |         | 100.0 |      | 100.0 |      | 96.0  |     |
|                            |                     | 3.1      | 100.0 |      | 84.0  |      | 100.0 |         | 100.0 |      | 92.0  |      | 100.0 |     |
|                            |                     | 4.1      | 96.0  |      | 100.0 |      | 100.0 |         | 96.0  |      | 91.7  |      | 100.0 |     |
|                            |                     | 1.2      | 96.0  |      | 100.0 |      | 100.0 |         | 96.0  |      | 100.0 |      | 100.0 |     |
|                            |                     | 2.2      | 96.0  |      | 87.5  |      | 100.0 |         | 100.0 |      | 100.0 |      | 100.0 |     |
|                            |                     | 3.2      | 96.0  |      | 91.7  |      | 100.0 |         | 100.0 |      | 92.0  |      | 100.0 |     |
|                            |                     | 4.2      | 96.0  |      | 83.4  |      | 100.0 |         | 96.0  |      | 95.9  |      | 95.7  |     |
|                            |                     |          | 97.5  | 2.1  | 90.3  | 6.8  | 99.4  | 1.7     | 98.0  | 2.1  | 96.5  | 4.0  | 99.0  | 1.9 |
| <b>24B + DJ1077</b>        |                     |          |       |      |       |      |       |         |       |      |       |      |       |     |
| 24B                        | UAS-grim;DJ1077     | 1.1      | 0.0   |      | 0.0   |      | 0.0   |         | 0.0   |      | 0.0   |      | 0.0   |     |
|                            |                     | 2.1      | 0.0   |      | 0.0   |      | 0.0   |         | 0.0   |      | 0.0   |      | 0.0   |     |
|                            |                     | 3.1      | 0.0   |      | 0.0   |      | 0.0   |         | 0.0   |      | 0.0   |      | 0.0   |     |
|                            |                     | 4.1      | 0.0   |      | 0.0   |      | 0.0   |         | 0.0   |      | 0.0   |      | 0.0   |     |
|                            |                     |          | 0.0   | 0.0  | 0.0   | 0.0  | 0.0   | 0.0     | 0.0   | 0.0  | 0.0   | 0.0  | 0.0   | 0.0 |
| <b>24B + 3.3</b>           |                     |          |       |      |       |      |       |         |       |      |       |      |       |     |
| 24B                        | UAS-grim;3.3        | 1.1      | 0.0   |      | 0.0   |      | 0.0   |         | 0.0   |      | 0.0   |      | 0.0   |     |
|                            |                     | 2.1      | 0.0   |      | 0.0   |      | 0.0   |         | 0.0   |      | 0.0   |      | 0.0   |     |
|                            |                     | 3.1      | 0.0   |      | 0.0   |      | 0.0   |         | 0.0   |      | 0.0   |      | 0.0   |     |
|                            |                     | 4.1      | 0.0   |      | 0.0   |      | 0.0   |         | 0.0   |      | 0.0   |      | 0.0   |     |
|                            |                     |          | 0.0   | 0.0  | 0.0   | 0.0  | 0.0   | 0.0     | 0.0   | 0.0  | 0.0   | 0.0  | 0.0   | 0.0 |

| 4 of 17              | Parents             | Plate #. | %L1   | SD   | %P    | SD   | %A    | SD   | %L1     | SD   | %P    | SD   | %A    | SD  |
|----------------------|---------------------|----------|-------|------|-------|------|-------|------|---------|------|-------|------|-------|-----|
| Male                 | Female              | Exp #    | AMP   |      |       |      |       |      | AMP/TET |      |       |      |       |     |
| 24B + 1X146 + 1X147  |                     |          |       |      |       |      |       |      |         |      |       |      |       |     |
| 24B                  | UAS-grim;2.1+DJ1077 | 1.1      | 32.0  |      | 0.0   |      | 0.0   |      | 8.0     |      | 0.0   |      | 0.0   |     |
|                      |                     | 2.1      | 20.0  |      | 0.0   |      | 0.0   |      | 12.0    |      | 0.0   |      | 0.0   |     |
|                      |                     | 3.1      | 36.0  |      | 0.0   |      | 0.0   |      | 12.0    |      | 0.0   |      | 0.0   |     |
|                      |                     | 4.1      | 44.0  |      | 0.0   |      | 0.0   |      | 12.0    |      | 0.0   |      | 0.0   |     |
| 24B                  | UAS-grim;2.1+DJ1079 | 1.2      | 40.0  |      | 0.0   |      | 0.0   |      | 20.0    |      | 0.0   |      | 0.0   |     |
|                      |                     | 2.2      | 36.0  |      | 0.0   |      | 0.0   |      | 20.0    |      | 0.0   |      | 0.0   |     |
|                      |                     | 3.2      | 24.0  |      | 0.0   |      | 0.0   |      | 32.0    |      | 0.0   |      | 0.0   |     |
|                      |                     | 4.2      | 16.0  |      | 0.0   |      | 0.0   |      | 32.0    |      | 0.0   |      | 0.0   |     |
|                      |                     |          | 31.0  | 10.0 | 0.0   | 0.0  | 0.0   | 0.0  | 18.5    | 9.3  | 0.0   | 0.0  | 0.0   | 0.0 |
| ELAV + 0 GAL80       |                     |          |       |      |       |      |       |      |         |      |       |      |       |     |
| ELAV                 | UAS-grim            | 1.1      | 0.0   |      | 0.0   |      | 0.0   |      | 0.0     |      | 0.0   |      | 0.0   |     |
|                      |                     | 2.1      | 0.0   |      | 0.0   |      | 0.0   |      | 0.0     |      | 0.0   |      | 0.0   |     |
|                      |                     | 3.1      | 0.0   |      | 0.0   |      | 0.0   |      | 0.0     |      | 0.0   |      | 0.0   |     |
|                      |                     | 4.1      | 0.0   |      | 0.0   |      | 0.0   |      | 0.0     |      | 0.0   |      | 0.0   |     |
|                      |                     |          | 0.0   | 0.0  | 0.0   | 0.0  | 0.0   | 0.0  | 0.0     | 0.0  | 0.0   | 0.0  | 0.0   | 0.0 |
| 0 GAL80              |                     |          |       |      |       |      |       |      |         |      |       |      |       |     |
| ELAV                 | w                   | 1.1      | 96.0  |      | 83.4  |      | 100.0 |      | 100.0   |      | 84.0  |      | 100.0 |     |
|                      |                     | 2.1      | 100.0 |      | 96.0  |      | 100.0 |      | 100.0   |      | 100.0 |      | 100.0 |     |
|                      |                     | 3.1      | 92.0  |      | 100.0 |      | 95.7  |      | 100.0   |      | 92.0  |      | 100.0 |     |
|                      |                     | 4.1      | 92.0  |      | 69.6  |      | 81.3  |      | 100.0   |      | 84.0  |      | 100.0 |     |
|                      |                     | 1.2      | 100.0 |      | 88.0  |      | 100.0 |      | 100.0   |      | 88.0  |      | 100.0 |     |
|                      |                     | 2.2      | 92.0  |      | 100.0 |      | 100.0 |      | 100.0   |      | 80.0  |      | 100.0 |     |
|                      |                     | 3.2      | 92.0  |      | 87.0  |      | 100.0 |      | 96.0    |      | 87.5  |      | 100.0 |     |
|                      |                     | 4.2      | 96.0  |      | 79.2  |      | 100.0 |      | 96.0    |      | 79.2  |      | 100.0 |     |
|                      |                     |          | 95.0  | 3.5  | 87.9  | 10.6 | 97.1  | 6.6  | 99.0    | 1.9  | 86.8  | 6.8  | 100.0 | 0.0 |
| ELAV + DJ1077        |                     |          |       |      |       |      |       |      |         |      |       |      |       |     |
| ELAV                 | UAS-grim;DJ1077     | 1.1      | 36.0  |      | 0.0   |      | 0.0   |      | 64.0    |      | 0.0   |      | 0.0   |     |
|                      |                     | 2.1      | 44.0  |      | 0.0   |      | 0.0   |      | 40.0    |      | 0.0   |      | 0.0   |     |
|                      |                     | 3.1      | 68.0  |      | 0.0   |      | 0.0   |      | 56.0    |      | 0.0   |      | 0.0   |     |
|                      |                     | 4.1      | 60.0  |      | 0.0   |      | 0.0   |      | 52.0    |      | 0.0   |      | 0.0   |     |
|                      |                     |          | 52.0  | 14.6 | 0.0   | 0.0  | 0.0   | 0.0  | 53.0    | 10.0 | 0.0   | 0.0  | 0.0   | 0.0 |
| ELAV + 3.3           |                     |          |       |      |       |      |       |      |         |      |       |      |       |     |
| ELAV                 | UAS-grim;3.3        | 1.1      | 0.0   |      | 0.0   |      | 0.0   |      | 0.0     |      | 0.0   |      | 0.0   |     |
|                      |                     | 2.1      | 0.0   |      | 0.0   |      | 0.0   |      | 0.0     |      | 0.0   |      | 0.0   |     |
|                      |                     | 3.1      | 0.0   |      | 0.0   |      | 0.0   |      | 0.0     |      | 0.0   |      | 0.0   |     |
|                      |                     | 4.1      | 0.0   |      | 0.0   |      | 0.0   |      | 0.0     |      | 0.0   |      | 0.0   |     |
|                      |                     |          | 0.0   | 0.0  | 0.0   | 0.0  | 0.0   | 0.0  | 0.0     | 0.0  | 0.0   | 0.0  | 0.0   | 0.0 |
| ELAV + 1X146 + 1X147 |                     |          |       |      |       |      |       |      |         |      |       |      |       |     |
| ELAV                 | UAS-grim;2.1+DJ1077 | 1.1      | 80.0  |      | 0.0   |      | 0.0   |      | 68.0    |      | 0.0   |      | 0.0   |     |
|                      |                     | 2.1      | 68.0  |      | 0.0   |      | 0.0   |      | 72.0    |      | 0.0   |      | 0.0   |     |
|                      |                     | 3.1      | 64.0  |      | 0.0   |      | 0.0   |      | 52.0    |      | 0.0   |      | 0.0   |     |
|                      |                     | 4.1      | 72.0  |      | 0.0   |      | 0.0   |      | 84.0    |      | 0.0   |      | 0.0   |     |
| ELAV                 | UAS-grim;2.1+DJ1079 | 1.2      | 16.0  |      | 0.0   |      | 0.0   |      | 56.0    |      | 0.0   |      | 0.0   |     |
|                      |                     | 2.2      | 44.0  |      | 0.0   |      | 0.0   |      | 44.0    |      | 0.0   |      | 0.0   |     |
|                      |                     | 3.2      | 28.0  |      | 0.0   |      | 0.0   |      | 52.0    |      | 0.0   |      | 0.0   |     |
|                      |                     | 4.2      | 44.0  |      | 0.0   |      | 0.0   |      | 36.0    |      | 0.0   |      | 0.0   |     |
|                      |                     |          | 52.0  | 22.6 | 0.0   | 0.0  | 0.0   | 0.0  | 58.0    | 15.7 | 0.0   | 0.0  | 0.0   | 0.0 |
| DJ646 + 0 GAL80      |                     |          |       |      |       |      |       |      |         |      |       |      |       |     |
| DJ646                | UAS-grim            | 1.1      | 88.0  |      | 18.2  |      | 25.0  |      | 76.0    |      | 57.9  |      | 0.0   |     |
|                      |                     | 2.1      | 52.0  |      | 7.7   |      | 100.0 |      | 60.0    |      | 60.0  |      | 0.0   |     |
|                      |                     | 3.1      | 84.0  |      | 0.0   |      | 0.0   |      | 64.0    |      | 31.3  |      | 0.0   |     |
|                      |                     | 4.1      | 88.0  |      | 13.7  |      | 0.0   |      | 76.0    |      | 52.7  |      | 0.0   |     |
|                      |                     | 1.2      | 92.0  |      | 30.5  |      | 28.6  |      | 100.0   |      | 36.0  |      | 0.0   |     |
|                      |                     | 2.2      | 96.0  |      | 37.5  |      | 11.2  |      | 92.0    |      | 34.8  |      | 0.0   |     |
|                      |                     | 3.2      | 96.0  |      | 29.2  |      | 14.3  |      | 92.0    |      | 26.1  |      | 16.7  |     |
|                      |                     | 4.2      | 96.0  |      | 29.2  |      | 14.3  |      | 92.0    |      | 34.8  |      | 25.0  |     |
|                      |                     |          | 86.5  | 14.6 | 20.8  | 13.0 | 24.2  | 32.3 | 81.5    | 14.6 | 41.7  | 13.1 | 5.2   | 9.9 |
| 0 GAL80              |                     |          |       |      |       |      |       |      |         |      |       |      |       |     |
| DJ646                | w                   | 1.1      | 92.0  |      | 87.0  |      | 95.0  |      | 88.0    |      | 63.7  |      | 100.0 |     |
|                      |                     | 2.1      | 92.0  |      | 91.4  |      | 95.3  |      | 68.0    |      | 53.0  |      | 88.9  |     |
|                      |                     | 3.1      | 92.0  |      | 78.3  |      | 100.0 |      | 40.0    |      | 70.0  |      | 100.0 |     |
|                      |                     | 4.1      | 96.0  |      | 83.4  |      | 90.0  |      | 52.0    |      | 92.4  |      | 75.0  |     |
|                      |                     | 1.2      | 96.0  |      | 79.2  |      | 94.8  |      | 96.0    |      | 91.7  |      | 100.0 |     |
|                      |                     | 2.2      | 92.0  |      | 87.0  |      | 100.0 |      | 96.0    |      | 95.9  |      | 100.0 |     |
|                      |                     | 3.2      | 100.0 |      | 88.0  |      | 100.0 |      | 100.0   |      | 88.0  |      | 100.0 |     |
|                      |                     | 4.2      | 96.0  |      | 70.9  |      | 94.2  |      | 100.0   |      | 88.0  |      | 100.0 |     |
|                      |                     |          | 94.5  | 3.0  | 83.2  | 6.7  | 96.2  | 3.6  | 80.0    | 23.6 | 80.3  | 15.9 | 95.5  | 9.1 |



| 5 of 17                      | Parents             | Plate #. | %L1   | SD   | %P   | SD   | %A      | SD   | %L1   | SD   | %P    | SD   | %A    | SD   |
|------------------------------|---------------------|----------|-------|------|------|------|---------|------|-------|------|-------|------|-------|------|
| Male                         | Female              | Exp #    | AMP   |      |      |      | AMP/TET |      |       |      |       |      |       |      |
| <b>DJ646 + DJ1077</b>        |                     |          |       |      |      |      |         |      |       |      |       |      |       |      |
| DJ646                        | UAS-grim;DJ1077     | 1.1      | 56.0  |      | 85.8 |      | 100.0   |      | 92.0  |      | 87.0  |      | 80.0  |      |
|                              |                     | 2.1      | 80.0  |      | 75.0 |      | 86.7    |      | 84.0  |      | 76.2  |      | 62.5  |      |
|                              |                     | 3.1      | 80.0  |      | 90.0 |      | 94.5    |      | 92.0  |      | 65.3  |      | 73.4  |      |
|                              |                     | 4.1      | 92.0  |      | 56.6 |      | 84.7    |      | 80.0  |      | 90.0  |      | 77.8  |      |
|                              |                     |          | 77.0  | 15.1 | 76.9 | 14.9 | 91.5    | 7.1  | 87.0  | 6.0  | 79.6  | 11.2 | 73.4  | 7.8  |
| <b>DJ646 + 3.3</b>           |                     |          |       |      |      |      |         |      |       |      |       |      |       |      |
| DJ646                        | UAS-grim;3.3        | 1.1      | 92.0  |      | 52.2 |      | 66.7    |      | 80.0  |      | 75.0  |      | 13.4  |      |
|                              |                     | 2.1      | 96.0  |      | 62.5 |      | 100.0   |      | 72.0  |      | 50.0  |      | 33.4  |      |
|                              |                     | 3.1      | 88.0  |      | 54.6 |      | 75.0    |      | 88.0  |      | 54.6  |      | 83.4  |      |
|                              |                     | 4.1      | 92.0  |      | 26.1 |      | 66.7    |      | 80.0  |      | 70.0  |      | 71.5  |      |
|                              |                     |          | 92.0  | 3.3  | 48.9 | 15.8 | 77.1    | 15.8 | 80.0  | 6.5  | 62.4  | 12.0 | 50.4  | 32.6 |
| <b>DJ646 + 1X146 + 1X147</b> |                     |          |       |      |      |      |         |      |       |      |       |      |       |      |
| DJ646                        | UAS-grim;2.1+DJ1077 | 1.1      | 84.0  |      | 47.7 |      | 90.0    |      | 92.0  |      | 69.6  |      | 93.8  |      |
|                              |                     | 2.1      | 80.0  |      | 55.0 |      | 100.0   |      | 84.0  |      | 57.2  |      | 100.0 |      |
|                              |                     | 3.1      | 92.0  |      | 60.9 |      | 92.9    |      | 96.0  |      | 83.4  |      | 100.0 |      |
|                              |                     | 4.1      | 96.0  |      | 62.5 |      | 100.0   |      | 96.0  |      | 62.5  |      | 100.0 |      |
| DJ646                        | UAS-grim;2.1+DJ1079 | 1.2      | 88.0  |      | 91.0 |      | 100.0   |      | 88.0  |      | 45.5  |      | 100.0 |      |
|                              |                     | 2.2      | 76.0  |      | 79.0 |      | 93.4    |      | 80.0  |      | 85.0  |      | 100.0 |      |
|                              |                     | 3.2      | 72.0  |      | 72.3 |      | 100.0   |      | 76.0  |      | 63.2  |      | 100.0 |      |
|                              |                     | 4.2      | 68.0  |      | 64.8 |      | 100.0   |      | 72.0  |      | 55.6  |      | 100.0 |      |
|                              |                     |          | 82.0  | 9.8  | 66.7 | 13.8 | 97.0    | 4.2  | 85.5  | 9.1  | 65.3  | 13.6 | 99.2  | 2.2  |
| <b>YPI-GAL4 + 0 GAL80</b>    |                     |          |       |      |      |      |         |      |       |      |       |      |       |      |
| YPI-GAL4                     | UAS-grim            | 1.1      | 96.0  |      | 58.4 |      | 100.0   |      | 100.0 |      | 80.0  |      | 100.0 |      |
|                              |                     | 2.1      | 92.0  |      | 56.6 |      | 100.0   |      | 100.0 |      | 88.0  |      | 95.5  |      |
|                              |                     | 3.1      | 88.0  |      | 63.7 |      | 100.0   |      | 100.0 |      | 84.0  |      | 100.0 |      |
|                              |                     | 4.1      | 92.0  |      | 60.9 |      | 100.0   |      | 96.0  |      | 91.7  |      | 100.0 |      |
|                              |                     | 1.2      | 100.0 |      | 80.0 |      | 100.0   |      | 88.0  |      | 59.1  |      | 100.0 |      |
|                              |                     | 2.2      | 96.0  |      | 70.9 |      | 100.0   |      | 92.0  |      | 82.7  |      | 100.0 |      |
|                              |                     | 3.2      | 96.0  |      | 75.0 |      | 100.0   |      | 100.0 |      | 84.0  |      | 100.0 |      |
|                              |                     | 4.2      | 92.0  |      | 47.9 |      | 91.0    |      | 92.0  |      | 91.4  |      | 100.0 |      |
|                              |                     |          | 94.0  | 3.7  | 64.2 | 10.6 | 98.9    | 3.2  | 96.0  | 4.8  | 82.6  | 10.4 | 99.4  | 1.6  |
| <b>0 GAL80</b>               |                     |          |       |      |      |      |         |      |       |      |       |      |       |      |
| YPI-GAL4                     | w                   | 1.1      | 64.0  |      | 56.3 |      | 77.8    |      | 32.0  |      | 62.5  |      | 100.0 |      |
|                              |                     | 2.1      | 40.0  |      | 60.0 |      | 83.4    |      | 44.0  |      | 63.7  |      | 85.8  |      |
|                              |                     | 3.1      | 44.0  |      | 81.9 |      | 100.0   |      | 44.0  |      | 72.8  |      | 87.5  |      |
|                              |                     | 4.1      | 28.0  |      | 85.8 |      | 100.0   |      | 36.0  |      | 66.7  |      | 100.0 |      |
|                              |                     | 1.2      | 100.0 |      | 76.0 |      | 100.0   |      | 96.0  |      | 87.5  |      | 100.0 |      |
|                              |                     | 2.2      | 92.0  |      | 78.3 |      | 100.0   |      | 92.0  |      | 87.0  |      | 100.0 |      |
|                              |                     | 3.2      | 96.0  |      | 79.2 |      | 100.0   |      | 92.0  |      | 87.0  |      | 100.0 |      |
|                              |                     | 4.2      | 100.0 |      | 76.0 |      | 100.0   |      | 100.0 |      | 96.0  |      | 100.0 |      |
|                              |                     |          | 70.5  | 30.1 | 74.2 | 10.4 | 95.2    | 9.1  | 67.0  | 30.3 | 77.9  | 13.0 | 96.7  | 6.2  |
| <b>YPI-GAL4 + DJ1077</b>     |                     |          |       |      |      |      |         |      |       |      |       |      |       |      |
| YPI-GAL4                     | UAS-grim;DJ1077     | 1.1      | 72.0  |      | 66.7 |      | 100.0   |      | 80.0  |      | 85.0  |      | 100.0 |      |
|                              |                     | 2.1      | 80.0  |      | 80.0 |      | 87.5    |      | 84.0  |      | 85.8  |      | 100.0 |      |
|                              |                     | 3.1      | 88.0  |      | 81.9 |      | 100.0   |      | 84.0  |      | 100.0 |      | 100.0 |      |
|                              |                     | 4.1      | 84.0  |      | 66.7 |      | 100.0   |      | 88.0  |      | 95.5  |      | 100.0 |      |
|                              |                     |          | 81.0  | 6.8  | 73.8 | 8.3  | 96.9    | 6.3  | 84.0  | 3.3  | 91.6  | 7.4  | 100.0 | 0.0  |
| <b>YPI-GAL4 + 3.3</b>        |                     |          |       |      |      |      |         |      |       |      |       |      |       |      |
| YPI-GAL4                     | UAS-grim;3.3        | 1.1      | 96.0  |      | 83.4 |      | 95.0    |      | 96.0  |      | 66.7  |      | 100.0 |      |
|                              |                     | 2.1      | 96.0  |      | 75.0 |      | 94.5    |      | 100.0 |      | 64.0  |      | 87.5  |      |
|                              |                     | 3.1      | 88.0  |      | 81.9 |      | 94.5    |      | 92.0  |      | 82.7  |      | 100.0 |      |
|                              |                     | 4.1      | 100.0 |      | 72.0 |      | 100.0   |      | 100.0 |      | 76.0  |      | 100.0 |      |
|                              |                     |          | 95.0  | 5.0  | 78.1 | 5.5  | 96.0    | 2.7  | 97.0  | 3.8  | 72.4  | 8.6  | 96.9  | 6.3  |
| <b>DJ628 + 0 GAL80</b>       |                     |          |       |      |      |      |         |      |       |      |       |      |       |      |
| DJ628                        | UAS-grim            | 1.1      | 88.0  |      | 0.0  |      | 0.0     |      | 96.0  |      | 0.0   |      | 0.0   |      |
|                              |                     | 2.1      | 100.0 |      | 0.0  |      | 0.0     |      | 96.0  |      | 0.0   |      | 0.0   |      |
|                              |                     | 3.1      | 100.0 |      | 0.0  |      | 0.0     |      | 100.0 |      | 0.0   |      | 0.0   |      |
|                              |                     | 4.1      | 96.0  |      | 0.0  |      | 0.0     |      | 96.0  |      | 0.0   |      | 0.0   |      |
|                              |                     | 1.2      | 88.0  |      | 0.0  |      | 0.0     |      | 76.0  |      | 0.0   |      | 0.0   |      |
|                              |                     | 2.2      | 64.0  |      | 0.0  |      | 0.0     |      | 76.0  |      | 0.0   |      | 0.0   |      |
|                              |                     | 3.2      | 68.0  |      | 0.0  |      | 0.0     |      | 84.0  |      | 0.0   |      | 0.0   |      |
|                              |                     | 4.2      | 68.0  |      | 0.0  |      | 0.0     |      | 80.0  |      | 0.0   |      | 0.0   |      |
|                              |                     |          | 84.0  | 15.1 | 0.0  | 0.0  | 0.0     | 0.0  | 88.0  | 10.0 | 0.0   | 0.0  | 0.0   | 0.0  |

| 6 of 17                      | Parents             | Plate #. | %L1   | SD   | %P    | SD   | %A    | SD      | %L1   | SD   | %P   | SD   | %A    | SD   |
|------------------------------|---------------------|----------|-------|------|-------|------|-------|---------|-------|------|------|------|-------|------|
| Male                         | Female              | Exp #    | AMP   |      |       |      |       | AMP/TET |       |      |      |      |       |      |
| <b>0 GAL80</b>               |                     |          |       |      |       |      |       |         |       |      |      |      |       |      |
| DJ628                        | w                   | 1.1      | 96.0  |      | 95.9  |      | 100.0 |         | 96.0  |      | 91.7 |      | 100.0 |      |
|                              |                     | 2.1      | 96.0  |      | 87.5  |      | 95.3  |         | 92.0  |      | 95.7 |      | 91.0  |      |
|                              |                     | 3.1      | 88.0  |      | 95.5  |      | 100.0 |         | 100.0 |      | 88.0 |      | 100.0 |      |
|                              |                     | 4.1      | 100.0 |      | 100.0 |      | 100.0 |         | 96.0  |      | 91.7 |      | 100.0 |      |
|                              |                     | 1.2      | 96.0  |      | 87.5  |      | 100.0 |         | 92.0  |      | 91.4 |      | 100.0 |      |
|                              |                     | 2.2      | 100.0 |      | 100.0 |      | 100.0 |         | 96.0  |      | 87.5 |      | 100.0 |      |
|                              |                     | 3.2      | 92.0  |      | 87.0  |      | 100.0 |         | 92.0  |      | 91.4 |      | 100.0 |      |
|                              |                     | 4.2      | 88.0  |      | 100.0 |      | 100.0 |         | 100.0 |      | 96.0 |      | 100.0 |      |
|                              |                     |          |       |      | 94.5  | 4.8  | 94.2  | 5.9     | 99.4  | 1.7  | 95.5 | 3.3  | 91.7  | 3.1  |
| <b>DJ628 + DJ1077</b>        |                     |          |       |      |       |      |       |         |       |      |      |      |       |      |
| DJ628                        | UAS-grim;DJ1077     | 1.1      | 84.0  |      | 33.4  |      | 0.0   |         | 100.0 |      | 0.0  |      | 0.0   |      |
|                              |                     | 2.1      | 84.0  |      | 28.6  |      | 0.0   |         | 92.0  |      | 0.0  |      | 0.0   |      |
|                              |                     | 3.1      | 100.0 |      | 28.0  |      | 0.0   |         | 88.0  |      | 0.0  |      | 0.0   |      |
|                              |                     | 4.1      | 84.0  |      | 28.6  |      | 0.0   |         | 84.0  |      | 0.0  |      | 0.0   |      |
|                              |                     | 1.2      | 52.0  |      | 0.0   |      | 0.0   |         | 68.0  |      | 0.0  |      | 0.0   |      |
|                              |                     | 2.2      | 48.0  |      | 0.0   |      | 0.0   |         | 56.0  |      | 0.0  |      | 0.0   |      |
|                              |                     | 3.2      | 52.0  |      | 0.0   |      | 0.0   |         | 56.0  |      | 0.0  |      | 0.0   |      |
|                              |                     | 4.2      | 64.0  |      | 0.0   |      | 0.0   |         | 52.0  |      | 0.0  |      | 0.0   |      |
|                              |                     |          |       |      | 71.0  | 19.4 | 14.8  | 15.9    | 0.0   | 0.0  | 74.5 | 18.8 | 0.0   | 0.0  |
| <b>DJ628 + 3.3</b>           |                     |          |       |      |       |      |       |         |       |      |      |      |       |      |
| DJ628                        | UAS-grim;3.3        | 1.1      | 96.0  |      | 16.7  |      | 0.0   |         | 84.0  |      | 4.8  |      | 0.0   |      |
|                              |                     | 2.1      | 92.0  |      | 0.0   |      | 0.0   |         | 76.0  |      | 0.0  |      | 0.0   |      |
|                              |                     | 3.1      | 84.0  |      | 9.6   |      | 0.0   |         | 80.0  |      | 0.0  |      | 0.0   |      |
|                              |                     | 4.1      | 84.0  |      | 19.1  |      | 0.0   |         | 76.0  |      | 0.0  |      | 0.0   |      |
|                              |                     | 1.2      | 56.0  |      | 35.8  |      | 0.0   |         | 40.0  |      | 30.0 |      | 0.0   |      |
|                              |                     | 2.2      | 56.0  |      | 0.0   |      | 0.0   |         | 36.0  |      | 11.2 |      | 0.0   |      |
|                              |                     | 3.2      | 64.0  |      | 6.3   |      | 0.0   |         | 56.0  |      | 7.2  |      | 0.0   |      |
|                              |                     | 4.2      | 68.0  |      | 0.0   |      | 0.0   |         | 28.0  |      | 28.6 |      | 0.0   |      |
|                              |                     |          |       |      | 75.0  | 16.0 | 10.9  | 12.5    | 0.0   | 0.0  | 59.5 | 22.4 | 10.2  | 12.4 |
| <b>DJ628 + 1X146 + 1X147</b> |                     |          |       |      |       |      |       |         |       |      |      |      |       |      |
| DJ628                        | UAS-grim;2.1+DJ1077 | 1.1      | 76.0  |      | 42.2  |      | 0.0   |         | 84.0  |      | 14.3 |      | 0.0   |      |
|                              |                     | 2.1      | 76.0  |      | 73.7  |      | 0.0   |         | 80.0  |      | 35.0 |      | 0.0   |      |
|                              |                     | 3.1      | 80.0  |      | 15.0  |      | 0.0   |         | 84.0  |      | 4.8  |      | 0.0   |      |
|                              |                     | 4.1      | 84.0  |      | 71.5  |      | 0.0   |         | 84.0  |      | 14.3 |      | 0.0   |      |
|                              |                     | 1.2      | 40.0  |      | 30.0  |      | 0.0   |         | 56.0  |      | 0.0  |      | 0.0   |      |
| DJ628                        | UAS-grim;2.1+DJ1079 | 2.2      | 32.0  |      | 25.0  |      | 0.0   |         | 48.0  |      | 0.0  |      | 0.0   |      |
|                              |                     | 3.2      | 36.0  |      | 0.0   |      | 0.0   |         | 76.0  |      | 0.0  |      | 0.0   |      |
|                              |                     | 4.2      | 48.0  |      | 16.7  |      | 0.0   |         | 52.0  |      | 0.0  |      | 0.0   |      |
|                              |                     |          | 59.0  | 22.0 | 34.3  | 26.6 | 0.0   | 0.0     | 70.5  | 15.7 | 8.6  | 12.4 | 0.0   | 0.0  |
| <b>DJ695 + 0 GAL80</b>       |                     |          |       |      |       |      |       |         |       |      |      |      |       |      |
| DJ695                        | UAS-grim            | 1.1      | 68.0  |      | 0.0   |      | 0.0   |         | 88.0  |      | 0.0  |      | 0.0   |      |
|                              |                     | 2.1      | 84.0  |      | 0.0   |      | 0.0   |         | 84.0  |      | 0.0  |      | 0.0   |      |
|                              |                     | 3.1      | 76.0  |      | 0.0   |      | 0.0   |         | 88.0  |      | 0.0  |      | 0.0   |      |
|                              |                     | 4.1      | 84.0  |      | 0.0   |      | 0.0   |         | 96.0  |      | 0.0  |      | 0.0   |      |
|                              |                     |          |       |      | 78.0  | 7.7  | 0.0   | 0.0     | 0.0   | 0.0  | 89.0 | 5.0  | 0.0   | 0.0  |
| <b>0 GAL80</b>               |                     |          |       |      |       |      |       |         |       |      |      |      |       |      |
| DJ695                        | w                   | 1.1      | 96.0  |      | 91.7  |      | 100.0 |         | 88.0  |      | 95.5 |      | 100.0 |      |
|                              |                     | 2.1      | 92.0  |      | 78.3  |      | 100.0 |         | 80.0  |      | 95.0 |      | 100.0 |      |
|                              |                     | 3.1      | 92.0  |      | 91.4  |      | 100.0 |         | 96.0  |      | 95.9 |      | 95.7  |      |
|                              |                     | 4.1      | 92.0  |      | 91.4  |      | 95.3  |         | 88.0  |      | 86.4 |      | 100.0 |      |
|                              |                     |          |       |      | 93.0  | 2.0  | 88.2  | 6.6     | 98.8  | 2.4  | 88.0 | 6.5  | 93.2  | 4.5  |
| <b>DJ695 + DJ1077</b>        |                     |          |       |      |       |      |       |         |       |      |      |      |       |      |
| DJ695                        | UAS-grim;DJ1077     | 1.1      | 100.0 |      | 0.0   |      | 0.0   |         | 92.0  |      | 0.0  |      | 0.0   |      |
|                              |                     | 2.1      | 92.0  |      | 0.0   |      | 0.0   |         | 84.0  |      | 0.0  |      | 0.0   |      |
|                              |                     | 3.1      | 96.0  |      | 0.0   |      | 0.0   |         | 84.0  |      | 0.0  |      | 0.0   |      |
|                              |                     | 4.1      | 96.0  |      | 0.0   |      | 0.0   |         | 96.0  |      | 0.0  |      | 0.0   |      |
|                              |                     |          |       |      | 96.0  | 3.3  | 0.0   | 0.0     | 0.0   | 0.0  | 89.0 | 6.0  | 0.0   | 0.0  |
| <b>DJ695 + 3.3</b>           |                     |          |       |      |       |      |       |         |       |      |      |      |       |      |
| DJ695                        | UAS-grim;3.3        | 1.1      | 80.0  |      | 0.0   |      | 0.0   |         | 72.0  |      | 0.0  |      | 0.0   |      |
|                              |                     | 2.1      | 80.0  |      | 0.0   |      | 0.0   |         | 80.0  |      | 0.0  |      | 0.0   |      |
|                              |                     | 3.1      | 80.0  |      | 0.0   |      | 0.0   |         | 60.0  |      | 0.0  |      | 0.0   |      |
|                              |                     | 4.1      | 84.0  |      | 0.0   |      | 0.0   |         | 72.0  |      | 0.0  |      | 0.0   |      |
|                              |                     |          |       |      | 81.0  | 2.0  | 0.0   | 0.0     | 0.0   | 0.0  | 71.0 | 8.2  | 0.0   | 0.0  |

| 7 of 17               | Parents             | Plate #. | %L1   | SD   | %P    | SD   | %A    | SD      | %L1   | SD   | %P    | SD  | %A    | SD  |
|-----------------------|---------------------|----------|-------|------|-------|------|-------|---------|-------|------|-------|-----|-------|-----|
| Male                  | Female              | Exp #    | AMP   |      |       |      |       | AMP/TET |       |      |       |     |       |     |
| DJ695 + 1X146 + 1X147 |                     |          |       |      |       |      |       |         |       |      |       |     |       |     |
| DJ695                 | UAS-grim;2.1+DJ1077 | 1.1      | 76.0  |      | 0.0   |      | 0.0   |         | 80.0  |      | 0.0   |     | 0.0   |     |
|                       |                     | 2.1      | 88.0  |      | 0.0   |      | 0.0   |         | 76.0  |      | 0.0   |     | 0.0   |     |
|                       |                     | 3.1      | 96.0  |      | 0.0   |      | 0.0   |         | 80.0  |      | 0.0   |     | 0.0   |     |
|                       |                     | 4.1      | 92.0  |      | 0.0   |      | 0.0   |         | 80.0  |      | 0.0   |     | 0.0   |     |
| DJ695                 | UAS-grim;2.1+DJ1079 | 1.2      | 40.0  |      | 0.0   |      | 0.0   |         | 68.0  |      | 0.0   |     | 0.0   |     |
|                       |                     | 2.2      | 52.0  |      | 0.0   |      | 0.0   |         | 56.0  |      | 0.0   |     | 0.0   |     |
|                       |                     | 3.2      | 48.0  |      | 0.0   |      | 0.0   |         | 76.0  |      | 0.0   |     | 0.0   |     |
|                       |                     | 4.2      | 28.0  |      | 0.0   |      | 0.0   |         | 72.0  |      | 0.0   |     | 0.0   |     |
|                       |                     |          | 65.0  | 26.2 | 0.0   | 0.0  | 0.0   | 0.0     | 73.5  | 8.3  | 0.0   | 0.0 | 0.0   | 0.0 |
| DJ715 + 0 GAL80       |                     |          |       |      |       |      |       |         |       |      |       |     |       |     |
| DJ715                 | UAS-grim;2.1+DJ1079 | 1.1      | 80.0  |      | 0.0   |      | 0.0   |         | 68.0  |      | 0.0   |     | 0.0   |     |
|                       |                     | 2.1      | 84.0  |      | 0.0   |      | 0.0   |         | 92.0  |      | 0.0   |     | 0.0   |     |
|                       |                     | 3.1      | 80.0  |      | 0.0   |      | 0.0   |         | 76.0  |      | 0.0   |     | 0.0   |     |
|                       |                     | 4.1      | 68.0  |      | 0.0   |      | 0.0   |         | 72.0  |      | 0.0   |     | 0.0   |     |
|                       |                     | 1.2      | 60.0  |      | 0.0   |      | 0.0   |         | 52.0  |      | 0.0   |     | 0.0   |     |
|                       |                     | 2.2      | 56.0  |      | 0.0   |      | 0.0   |         | 56.0  |      | 0.0   |     | 0.0   |     |
|                       |                     | 3.2      | 72.0  |      | 0.0   |      | 0.0   |         | 52.0  |      | 0.0   |     | 0.0   |     |
|                       |                     | 4.2      | 48.0  |      | 0.0   |      | 0.0   |         | 60.0  |      | 0.0   |     | 0.0   |     |
|                       |                     |          | 68.5  | 12.9 | 0.0   | 0.0  | 0.0   | 0.0     | 66.0  | 13.9 | 0.0   | 0.0 | 0.0   | 0.0 |
| 0 GAL80               |                     |          |       |      |       |      |       |         |       |      |       |     |       |     |
| DJ715                 | w                   | 1.1      | 96.0  |      | 62.5  |      | 93.4  |         | 84.0  |      | 81.0  |     | 100.0 |     |
|                       |                     | 2.1      | 96.0  |      | 100.0 |      | 95.9  |         | 80.0  |      | 80.0  |     | 100.0 |     |
|                       |                     | 3.1      | 96.0  |      | 83.4  |      | 100.0 |         | 84.0  |      | 81.0  |     | 100.0 |     |
|                       |                     | 4.1      | 100.0 |      | 84.0  |      | 100.0 |         | 68.0  |      | 76.5  |     | 92.4  |     |
|                       |                     | 1.2      | 80.0  |      | 100.0 |      | 100.0 |         | 92.0  |      | 91.4  |     | 100.0 |     |
|                       |                     | 2.2      | 84.0  |      | 76.2  |      | 100.0 |         | 92.0  |      | 87.0  |     | 100.0 |     |
|                       |                     | 3.2      | 96.0  |      | 87.5  |      | 100.0 |         | 96.0  |      | 83.4  |     | 100.0 |     |
|                       |                     | 4.2      | 92.0  |      | 87.0  |      | 100.0 |         | 96.0  |      | 100.0 |     | 100.0 |     |
|                       |                     |          | 92.5  | 6.9  | 85.1  | 12.2 | 98.7  | 2.6     | 86.5  | 9.5  | 85.0  | 7.6 | 99.1  | 2.7 |
| DJ715 + DJ1077        |                     |          |       |      |       |      |       |         |       |      |       |     |       |     |
| DJ715                 | UAS-grim;DJ1077     | 1.1      | 52.0  |      | 0.0   |      | 0.0   |         | 52.0  |      | 0.0   |     | 0.0   |     |
|                       |                     | 2.1      | 40.0  |      | 0.0   |      | 0.0   |         | 36.0  |      | 0.0   |     | 0.0   |     |
|                       |                     | 3.1      | 52.0  |      | 0.0   |      | 0.0   |         | 48.0  |      | 0.0   |     | 0.0   |     |
|                       |                     | 4.1      | 60.0  |      | 0.0   |      | 0.0   |         | 52.0  |      | 0.0   |     | 0.0   |     |
|                       |                     |          | 51.0  | 8.2  | 0.0   | 0.0  | 0.0   | 0.0     | 47.0  | 7.6  | 0.0   | 0.0 | 0.0   | 0.0 |
| DJ715 + 3.3           |                     |          |       |      |       |      |       |         |       |      |       |     |       |     |
| DJ715                 | UAS-grim;3.3        | 1.1      | 32.0  |      | 0.0   |      | 0.0   |         | 56.0  |      | 0.0   |     | 0.0   |     |
|                       |                     | 2.1      | 40.0  |      | 0.0   |      | 0.0   |         | 56.0  |      | 0.0   |     | 0.0   |     |
|                       |                     | 3.1      | 44.0  |      | 0.0   |      | 0.0   |         | 56.0  |      | 0.0   |     | 0.0   |     |
|                       |                     | 4.1      | 68.0  |      | 0.0   |      | 0.0   |         | 48.0  |      | 0.0   |     | 0.0   |     |
|                       |                     | 1.2      | 44.0  |      | 0.0   |      | 0.0   |         | 48.0  |      | 0.0   |     | 0.0   |     |
|                       |                     | 2.2      | 32.0  |      | 0.0   |      | 0.0   |         | 36.0  |      | 0.0   |     | 0.0   |     |
|                       |                     | 3.2      | 44.0  |      | 0.0   |      | 0.0   |         | 48.0  |      | 0.0   |     | 0.0   |     |
|                       |                     | 4.2      | 32.0  |      | 0.0   |      | 0.0   |         | 24.0  |      | 0.0   |     | 0.0   |     |
|                       |                     |          | 42.0  | 11.9 | 0.0   | 0.0  | 0.0   | 0.0     | 46.5  | 11.3 | 0.0   | 0.0 | 0.0   | 0.0 |
| DJ715 + 1X146 + 1X147 |                     |          |       |      |       |      |       |         |       |      |       |     |       |     |
| DJ715                 | UAS-grim;2.1+DJ1077 | 1.1      | 32.0  |      | 0.0   |      | 0.0   |         | 20.0  |      | 0.0   |     | 0.0   |     |
|                       |                     | 2.1      | 32.0  |      | 0.0   |      | 0.0   |         | 32.0  |      | 0.0   |     | 0.0   |     |
|                       |                     | 3.1      | 40.0  |      | 0.0   |      | 0.0   |         | 24.0  |      | 0.0   |     | 0.0   |     |
|                       |                     | 4.1      | 28.0  |      | 0.0   |      | 0.0   |         | 52.0  |      | 0.0   |     | 0.0   |     |
| DJ715                 | UAS-grim;2.1+DJ1079 | 1.2      | 16.0  |      | 0.0   |      | 0.0   |         | 24.0  |      | 0.0   |     | 0.0   |     |
|                       |                     | 2.2      | 36.0  |      | 0.0   |      | 0.0   |         | 16.0  |      | 0.0   |     | 0.0   |     |
|                       |                     | 3.2      | 32.0  |      | 0.0   |      | 0.0   |         | 32.0  |      | 0.0   |     | 0.0   |     |
|                       |                     | 4.2      | 32.0  |      | 0.0   |      | 0.0   |         | 28.0  |      | 0.0   |     | 0.0   |     |
|                       |                     |          | 31.0  | 7.0  | 0.0   | 0.0  | 0.0   | 0.0     | 28.5  | 11.0 | 0.0   | 0.0 | 0.0   | 0.0 |
| DJ752 + 0 GAL80       |                     |          |       |      |       |      |       |         |       |      |       |     |       |     |
| DJ752                 | UAS-grim            | 1.1      | 0.0   |      | 0.0   |      | 0.0   |         | 0.0   |      | 0.0   |     | 0.0   |     |
|                       |                     | 2.1      | 0.0   |      | 0.0   |      | 0.0   |         | 0.0   |      | 0.0   |     | 0.0   |     |
|                       |                     | 3.1      | 0.0   |      | 0.0   |      | 0.0   |         | 0.0   |      | 0.0   |     | 0.0   |     |
|                       |                     | 4.1      | 0.0   |      | 0.0   |      | 0.0   |         | 0.0   |      | 0.0   |     | 0.0   |     |
|                       |                     |          | 0.0   | 0.0  | 0.0   | 0.0  | 0.0   | 0.0     | 0.0   | 0.0  | 0.0   | 0.0 | 0.0   | 0.0 |
| 0 GAL80               |                     |          |       |      |       |      |       |         |       |      |       |     |       |     |
| DJ752                 | w                   | 1.1      | 100.0 |      | 80.0  |      | 95.0  |         | 80.0  |      | 95.0  |     | 94.8  |     |
|                       |                     | 2.1      | 96.0  |      | 95.9  |      | 100.0 |         | 100.0 |      | 100.0 |     | 100.0 |     |
|                       |                     | 3.1      | 92.0  |      | 100.0 |      | 100.0 |         | 100.0 |      | 96.0  |     | 100.0 |     |
|                       |                     | 4.1      | 96.0  |      | 91.7  |      | 100.0 |         | 96.0  |      | 100.0 |     | 100.0 |     |
|                       |                     |          |       |      | 96.0  | 3.3  | 91.9  | 8.6     | 98.8  | 2.5  | 94.0  | 9.5 | 97.8  | 2.6 |

| 8 of 17                      | Parents             | Plate #. | %L1   | SD   | %P   | SD   | %A      | SD  | %L1   | SD   | %P   | SD  | %A    | SD  |
|------------------------------|---------------------|----------|-------|------|------|------|---------|-----|-------|------|------|-----|-------|-----|
| Male                         | Female              | Exp #    | AMP   |      |      |      | AMP/TET |     |       |      |      |     |       |     |
| <b>DJ752 + DJ1077</b>        |                     |          |       |      |      |      |         |     |       |      |      |     |       |     |
| DJ752                        | UAS-grim;DJ1077     | 1.1      | 36.0  |      | 0.0  |      | 0.0     |     | 20.0  |      | 0.0  |     | 0.0   |     |
|                              |                     | 2.1      | 20.0  |      | 0.0  |      | 0.0     |     | 20.0  |      | 0.0  |     | 0.0   |     |
|                              |                     | 3.1      | 16.0  |      | 0.0  |      | 0.0     |     | 0.0   |      | 0.0  |     | 0.0   |     |
|                              |                     | 4.1      | 20.0  |      | 0.0  |      | 0.0     |     | 20.0  |      | 0.0  |     | 0.0   |     |
|                              |                     |          | 23.0  | 8.9  | 0.0  | 0.0  | 0.0     | 0.0 | 15.0  | 10.0 | 0.0  | 0.0 | 0.0   | 0.0 |
| <b>DJ752 + 3.3</b>           |                     |          |       |      |      |      |         |     |       |      |      |     |       |     |
| DJ752                        | UAS-grim;3.3        | 1.1      | 0.0   |      | 0.0  |      | 0.0     |     | 0.0   |      | 0.0  |     | 0.0   |     |
|                              |                     | 2.1      | 0.0   |      | 0.0  |      | 0.0     |     | 0.0   |      | 0.0  |     | 0.0   |     |
|                              |                     | 3.1      | 0.0   |      | 0.0  |      | 0.0     |     | 0.0   |      | 0.0  |     | 0.0   |     |
|                              |                     | 4.1      | 0.0   |      | 0.0  |      | 0.0     |     | 0.0   |      | 0.0  |     | 0.0   |     |
|                              |                     |          | 0.0   | 0.0  | 0.0  | 0.0  | 0.0     | 0.0 | 0.0   | 0.0  | 0.0  | 0.0 | 0.0   | 0.0 |
| <b>DJ752 + 1X146 + 1X147</b> |                     |          |       |      |      |      |         |     |       |      |      |     |       |     |
| DJ752                        | UAS-grim;2.1+DJ1077 | 1.1      | 84.0  |      | 38.1 |      | 0.0     |     | 88.0  |      | 9.1  |     | 0.0   |     |
|                              |                     | 2.1      | 84.0  |      | 66.7 |      | 0.0     |     | 80.0  |      | 10.0 |     | 0.0   |     |
|                              |                     | 3.1      | 68.0  |      | 64.8 |      | 0.0     |     | 92.0  |      | 13.1 |     | 0.0   |     |
|                              |                     | 4.1      | 88.0  |      | 45.5 |      | 0.0     |     | 76.0  |      | 15.8 |     | 0.0   |     |
| DJ752                        | UAS-grim;2.1+DJ1079 | 1.2      | 36.0  |      | 11.2 |      | 0.0     |     | 56.0  |      | 14.3 |     | 0.0   |     |
|                              |                     | 2.2      | 48.0  |      | 33.4 |      | 0.0     |     | 72.0  |      | 5.6  |     | 0.0   |     |
|                              |                     | 3.2      | 52.0  |      | 30.8 |      | 0.0     |     | 48.0  |      | 0.0  |     | 0.0   |     |
|                              |                     | 4.2      | 40.0  |      | 30.0 |      | 0.0     |     | 44.0  |      | 9.1  |     | 0.0   |     |
|                              |                     |          | 62.5  | 21.2 | 40.1 | 18.6 | 0.0     | 0.0 | 69.5  | 18.1 | 9.6  | 5.1 | 0.0   | 0.0 |
| <b>DJ761 + 0 GAL80</b>       |                     |          |       |      |      |      |         |     |       |      |      |     |       |     |
| DJ761                        | UAS-grim            | 1.1      | 0.0   |      | 0.0  |      | 0.0     |     | 0.0   |      | 0.0  |     | 0.0   |     |
|                              |                     | 2.1      | 0.0   |      | 0.0  |      | 0.0     |     | 0.0   |      | 0.0  |     | 0.0   |     |
|                              |                     | 3.1      | 0.0   |      | 0.0  |      | 0.0     |     | 0.0   |      | 0.0  |     | 0.0   |     |
|                              |                     | 4.1      | 0.0   |      | 0.0  |      | 0.0     |     | 0.0   |      | 0.0  |     | 0.0   |     |
|                              |                     |          | 0.0   | 0.0  | 0.0  | 0.0  | 0.0     | 0.0 | 0.0   | 0.0  | 0.0  | 0.0 | 0.0   | 0.0 |
| <b>0 GAL80</b>               |                     |          |       |      |      |      |         |     |       |      |      |     |       |     |
| DJ761                        | w                   | 1.1      | 96.0  |      | 87.5 |      | 95.3    |     | 96.0  |      | 83.4 |     | 95.0  |     |
|                              |                     | 2.1      | 100.0 |      | 92.0 |      | 100.0   |     | 92.0  |      | 78.3 |     | 100.0 |     |
|                              |                     | 3.1      | 100.0 |      | 84.0 |      | 100.0   |     | 96.0  |      | 75.0 |     | 94.5  |     |
|                              |                     | 4.1      | 96.0  |      | 83.4 |      | 100.0   |     | 92.0  |      | 82.7 |     | 100.0 |     |
|                              |                     |          | 98.0  | 2.3  | 86.7 | 4.0  | 98.8    | 2.4 | 94.0  | 2.3  | 79.9 | 3.9 | 97.4  | 3.0 |
| <b>DJ761 + DJ1077</b>        |                     |          |       |      |      |      |         |     |       |      |      |     |       |     |
| DJ761                        | UAS-grim;DJ1077     | 1.1      | 48.0  |      | 0.0  |      | 0.0     |     | 72.0  |      | 0.0  |     | 0.0   |     |
|                              |                     | 2.1      | 32.0  |      | 0.0  |      | 0.0     |     | 56.0  |      | 0.0  |     | 0.0   |     |
|                              |                     | 3.1      | 36.0  |      | 0.0  |      | 0.0     |     | 56.0  |      | 0.0  |     | 0.0   |     |
|                              |                     | 4.1      | 56.0  |      | 0.0  |      | 0.0     |     | 56.0  |      | 0.0  |     | 0.0   |     |
|                              |                     |          | 43.0  | 11.0 | 0.0  | 0.0  | 0.0     | 0.0 | 60.0  | 8.0  | 0.0  | 0.0 | 0.0   | 0.0 |
| <b>DJ761 + 3.3</b>           |                     |          |       |      |      |      |         |     |       |      |      |     |       |     |
| DJ761                        | UAS-grim;3.3        | 1.1      | 0.0   |      | 0.0  |      | 0.0     |     | 0.0   |      | 0.0  |     | 0.0   |     |
|                              |                     | 2.1      | 0.0   |      | 0.0  |      | 0.0     |     | 0.0   |      | 0.0  |     | 0.0   |     |
|                              |                     | 3.1      | 0.0   |      | 0.0  |      | 0.0     |     | 0.0   |      | 0.0  |     | 0.0   |     |
|                              |                     | 4.1      | 0.0   |      | 0.0  |      | 0.0     |     | 0.0   |      | 0.0  |     | 0.0   |     |
|                              |                     |          | 0.0   | 0.0  | 0.0  | 0.0  | 0.0     | 0.0 | 0.0   | 0.0  | 0.0  | 0.0 | 0.0   | 0.0 |
| <b>DJ761 + 1X146 + 1X147</b> |                     |          |       |      |      |      |         |     |       |      |      |     |       |     |
| DJ761                        | UAS-grim;2.1+DJ1077 | 1.1      | 76.0  |      | 0.0  |      | 0.0     |     | 56.0  |      | 0.0  |     | 0.0   |     |
|                              |                     | 2.1      | 72.0  |      | 0.0  |      | 0.0     |     | 80.0  |      | 0.0  |     | 0.0   |     |
|                              |                     | 3.1      | 80.0  |      | 0.0  |      | 0.0     |     | 76.0  |      | 0.0  |     | 0.0   |     |
|                              |                     | 4.1      | 80.0  |      | 0.0  |      | 0.0     |     | 56.0  |      | 0.0  |     | 0.0   |     |
| DJ761                        | UAS-grim;2.1+DJ1079 | 1.2      | 52.0  |      | 0.0  |      | 0.0     |     | 52.0  |      | 0.0  |     | 0.0   |     |
|                              |                     | 2.2      | 60.0  |      | 0.0  |      | 0.0     |     | 44.0  |      | 0.0  |     | 0.0   |     |
|                              |                     | 3.2      | 60.0  |      | 0.0  |      | 0.0     |     | 48.0  |      | 0.0  |     | 0.0   |     |
|                              |                     | 4.2      | 64.0  |      | 0.0  |      | 0.0     |     | 52.0  |      | 0.0  |     | 0.0   |     |
|                              |                     |          | 68.0  | 10.5 | 0.0  | 0.0  | 0.0     | 0.0 | 58.0  | 13.0 | 0.0  | 0.0 | 0.0   | 0.0 |
| <b>DJ710 + 0 GAL80</b>       |                     |          |       |      |      |      |         |     |       |      |      |     |       |     |
| DJ710                        | UAS-grim            | 1.1      | 100.0 |      | 0.0  |      | 0.0     |     | 100.0 |      | 0.0  |     | 0.0   |     |
|                              |                     | 2.1      | 92.0  |      | 0.0  |      | 0.0     |     | 100.0 |      | 0.0  |     | 0.0   |     |
|                              |                     | 3.1      | 96.0  |      | 0.0  |      | 0.0     |     | 100.0 |      | 0.0  |     | 0.0   |     |
|                              |                     | 4.1      | 100.0 |      | 0.0  |      | 0.0     |     | 96.0  |      | 0.0  |     | 0.0   |     |
|                              |                     |          | 97.0  | 3.8  | 0.0  | 0.0  | 0.0     | 0.0 | 99.0  | 2.0  | 0.0  | 0.0 | 0.0   | 0.0 |

| 9 of 17                      | Parents             | Plate #. | %L1   | SD   | %P    | SD   | %A    | SD   | %L1     | SD   | %P    | SD   | %A    | SD  |
|------------------------------|---------------------|----------|-------|------|-------|------|-------|------|---------|------|-------|------|-------|-----|
| Male                         | Female              | Exp #    | AMP   |      |       |      |       |      | AMP/TET |      |       |      |       |     |
| <b>0 GAL80</b>               |                     |          |       |      |       |      |       |      |         |      |       |      |       |     |
| DJ710                        | w                   | 1.1      | 100.0 |      | 92.0  |      | 100.0 |      | 104.0   |      | 80.8  |      | 100.0 |     |
|                              |                     | 2.1      | 96.0  |      | 79.2  |      | 100.0 |      | 100.0   |      | 100.0 |      | 88.0  |     |
|                              |                     | 3.1      | 100.0 |      | 84.0  |      | 100.0 |      | 88.0    |      | 86.4  |      | 100.0 |     |
|                              |                     | 4.1      | 96.0  |      | 91.7  |      | 100.0 |      | 96.0    |      | 91.7  |      | 100.0 |     |
|                              |                     |          | 98.0  | 2.3  | 86.7  | 6.2  | 100.0 | 0.0  | 97.0    | 6.8  | 89.7  | 8.2  | 97.0  | 6.0 |
| <b>DJ710 + DJ1077</b>        |                     |          |       |      |       |      |       |      |         |      |       |      |       |     |
| DJ710                        | UAS-grim;DJ1077     | 1.1      | 92.0  |      | 74.0  |      | 64.8  |      | 80.0    |      | 0.0   |      | 0.0   |     |
|                              |                     | 2.1      | 92.0  |      | 60.9  |      | 35.8  |      | 84.0    |      | 0.0   |      | 0.0   |     |
|                              |                     | 3.1      | 80.0  |      | 55.0  |      | 54.6  |      | 100.0   |      | 0.0   |      | 0.0   |     |
|                              |                     | 4.1      | 84.0  |      | 66.7  |      | 42.9  |      | 96.0    |      | 0.0   |      | 0.0   |     |
|                              |                     |          | 87.0  | 6.0  | 64.2  | 8.1  | 49.5  | 12.8 | 90.0    | 9.5  | 0.0   | 0.0  | 0.0   | 0.0 |
| <b>DJ710 + 3.3</b>           |                     |          |       |      |       |      |       |      |         |      |       |      |       |     |
| DJ710                        | UAS-grim;3.3        | 1.1      | 100.0 |      | 72.0  |      | 0.0   |      | 100.0   |      | 0.0   |      | 0.0   |     |
|                              |                     | 2.1      | 96.0  |      | 50.0  |      | 0.0   |      | 80.0    |      | 0.0   |      | 0.0   |     |
|                              |                     | 3.1      | 96.0  |      | 79.2  |      | 0.0   |      | 88.0    |      | 0.0   |      | 0.0   |     |
|                              |                     | 4.1      | 100.0 |      | 72.0  |      | 0.0   |      | 84.0    |      | 0.0   |      | 0.0   |     |
|                              |                     |          | 98.0  | 2.3  | 68.3  | 12.7 | 0.0   | 0.0  | 88.0    | 8.6  | 0.0   | 0.0  | 0.0   | 0.0 |
| <b>DJ710 + 1X146 + 1X147</b> |                     |          |       |      |       |      |       |      |         |      |       |      |       |     |
| DJ710                        | UAS-grim;2.1+DJ1077 | 1.1      | 80.0  |      | 90.0  |      | 38.9  |      | 100.0   |      | 0.0   |      | 0.0   |     |
|                              |                     | 2.1      | 96.0  |      | 79.2  |      | 36.9  |      | 100.0   |      | 16.0  |      | 0.0   |     |
|                              |                     | 3.1      | 92.0  |      | 78.3  |      | 33.4  |      | 96.0    |      | 12.5  |      | 0.0   |     |
|                              |                     | 4.1      | 92.0  |      | 87.0  |      | 35.0  |      | 100.0   |      | 4.0   |      | 0.0   |     |
| DJ710                        | UAS-grim;2.1+DJ1079 | 1.2      | 52.0  |      | 38.5  |      | 40.0  |      | 76.0    |      | 10.6  |      | 0.0   |     |
|                              |                     | 2.2      | 56.0  |      | 57.2  |      | 12.5  |      | 80.0    |      | 35.0  |      | 1.0   |     |
|                              |                     | 3.2      | 48.0  |      | 25.0  |      | 0.0   |      | 68.0    |      | 41.2  |      | 2.0   |     |
|                              |                     | 4.2      | 48.0  |      | 33.4  |      | 25.0  |      | 72.0    |      | 16.7  |      | 3.0   |     |
|                              | 70.5                | 21.5     | 61.1  | 26.0 | 27.7  | 14.4 | 86.5  | 13.8 | 17.0    | 14.3 | 0.8   | 1.2  |       |     |
| <b>DJ849 + 0 GAL80</b>       |                     |          |       |      |       |      |       |      |         |      |       |      |       |     |
| DJ849                        | UAS-grim            | 1.1      | 92.0  |      | 52.2  |      | 91.7  |      | 100.0   |      | 64.0  |      | 87.5  |     |
|                              |                     | 2.1      | 92.0  |      | 56.6  |      | 92.4  |      | 92.0    |      | 56.6  |      | 77.0  |     |
|                              |                     | 3.1      | 88.0  |      | 50.0  |      | 100.0 |      | 92.0    |      | 60.9  |      | 78.6  |     |
|                              |                     | 4.1      | 92.0  |      | 52.2  |      | 91.7  |      | 92.0    |      | 65.3  |      | 93.4  |     |
|                              |                     | 1.2      | 76.0  |      | 68.5  |      | 100.0 |      | 84.0    |      | 100.0 |      | 71.5  |     |
|                              |                     | 2.2      | 68.0  |      | 53.0  |      | 55.6  |      | 76.0    |      | 100.0 |      | 36.9  |     |
|                              |                     | 3.2      | 60.0  |      | 53.4  |      | 87.5  |      | 76.0    |      | 84.3  |      | 56.3  |     |
|                              |                     | 4.2      | 68.0  |      | 64.8  |      | 72.8  |      | 80.0    |      | 85.0  |      | 82.4  |     |
|                              | 79.5                | 13.1     | 56.3  | 6.7  | 86.5  | 15.1 | 86.5  | 8.8  | 77.0    | 17.6 | 73.0  | 18.3 |       |     |
| <b>0 GAL80</b>               |                     |          |       |      |       |      |       |      |         |      |       |      |       |     |
| DJ849                        | w                   | 1.1      | 100.0 |      | 100.0 |      | 100.0 |      | 96.0    |      | 95.9  |      | 100.0 |     |
|                              |                     | 2.1      | 100.0 |      | 100.0 |      | 96.0  |      | 96.0    |      | 95.9  |      | 95.7  |     |
|                              |                     | 3.1      | 100.0 |      | 96.0  |      | 100.0 |      | 100.0   |      | 92.0  |      | 100.0 |     |
|                              |                     | 4.1      | 92.0  |      | 87.0  |      | 95.0  |      | 96.0    |      | 95.9  |      | 100.0 |     |
|                              |                     | 1.2      | 96.0  |      | 91.7  |      | 95.5  |      | 100.0   |      | 88.0  |      | 100.0 |     |
|                              |                     | 2.2      | 100.0 |      | 96.0  |      | 95.9  |      | 96.0    |      | 87.5  |      | 95.3  |     |
|                              |                     | 3.2      | 92.0  |      | 100.0 |      | 100.0 |      | 100.0   |      | 96.0  |      | 100.0 |     |
|                              |                     | 4.2      | 100.0 |      | 100.0 |      | 100.0 |      | 100.0   |      | 96.0  |      | 100.0 |     |
|                              | 97.5                | 3.7      | 96.3  | 4.8  | 97.8  | 2.4  | 98.0  | 2.1  | 93.4    | 3.7  | 98.9  | 2.1  |       |     |
| <b>DJ849 + DJ1077</b>        |                     |          |       |      |       |      |       |      |         |      |       |      |       |     |
| DJ849                        | UAS-grim;DJ1077     | 1.1      | 84.0  |      | 62.0  |      | 92.4  |      | 92.0    |      | 69.6  |      | 93.8  |     |
|                              |                     | 2.1      | 92.0  |      | 56.6  |      | 92.4  |      | 96.0    |      | 66.7  |      | 93.8  |     |
|                              |                     | 3.1      | 80.0  |      | 55.0  |      | 100.0 |      | 96.0    |      | 83.4  |      | 90.0  |     |
|                              |                     | 4.1      | 92.0  |      | 69.6  |      | 87.5  |      | 92.0    |      | 65.3  |      | 86.7  |     |
|                              |                     |          | 87.0  | 6.0  | 60.8  | 6.6  | 93.1  | 5.2  | 94.0    | 2.3  | 71.3  | 8.3  | 91.1  | 3.4 |
| <b>DJ849 + 3.3</b>           |                     |          |       |      |       |      |       |      |         |      |       |      |       |     |
| DJ849                        | UAS-grim;3.3        | 1.1      | 88.0  |      | 59.1  |      | 84.7  |      | 96.0    |      | 79.2  |      | 89.5  |     |
|                              |                     | 2.1      | 92.0  |      | 69.6  |      | 81.3  |      | 96.0    |      | 54.2  |      | 61.6  |     |
|                              |                     | 3.1      | 92.0  |      | 74.0  |      | 70.6  |      | 80.0    |      | 60.0  |      | 83.4  |     |
|                              |                     | 4.1      | 92.0  |      | 69.6  |      | 93.8  |      | 84.0    |      | 81.0  |      | 70.6  |     |
|                              |                     | 1.2      | 92.0  |      | 65.3  |      | 93.4  |      | 80.0    |      | 55.0  |      | 100.0 |     |
|                              |                     | 2.2      | 96.0  |      | 70.9  |      | 88.3  |      | 88.0    |      | 86.4  |      | 89.5  |     |
|                              |                     | 3.2      | 88.0  |      | 68.2  |      | 100.0 |      | 88.0    |      | 86.4  |      | 100.0 |     |
|                              |                     | 4.2      | 80.0  |      | 65.0  |      | 77.0  |      | 88.0    |      | 50.0  |      | 100.0 |     |
|                              | 90.0                | 4.8      | 67.7  | 4.5  | 86.1  | 9.7  | 87.5  | 6.2  | 69.0    | 15.6 | 86.8  | 14.4 |       |     |

| 10 of 17 Parents                |                     | Plate #. | %L1   | SD   | %P    | SD   | %A    | SD      | %L1   | SD   | %P    | SD   | %A    | SD   |
|---------------------------------|---------------------|----------|-------|------|-------|------|-------|---------|-------|------|-------|------|-------|------|
| Male                            | Female              | Exp #    | AMP   |      |       |      |       | AMP/TET |       |      |       |      |       |      |
| <b>DJ849 + 1X146 + 1X147</b>    |                     |          |       |      |       |      |       |         |       |      |       |      |       |      |
| DJ849                           | UAS-grim;2.1+DJ1077 | 1.1      | 60.0  |      | 100.0 |      | 100.0 |         | 72.0  |      | 83.4  |      | 100.0 |      |
|                                 |                     | 2.1      | 72.0  |      | 66.7  |      | 100.0 |         | 84.0  |      | 52.4  |      | 100.0 |      |
|                                 |                     | 3.1      | 76.0  |      | 68.5  |      | 100.0 |         | 88.0  |      | 86.4  |      | 100.0 |      |
|                                 |                     | 4.1      | 64.0  |      | 81.3  |      | 100.0 |         | 72.0  |      | 83.4  |      | 100.0 |      |
| DJ849                           | UAS-grim;2.1+DJ1079 | 1.2      | 64.0  |      | 37.5  |      | 100.0 |         | 96.0  |      | 33.4  |      | 100.0 |      |
|                                 |                     | 2.2      | 52.0  |      | 38.5  |      | 100.0 |         | 76.0  |      | 52.7  |      | 100.0 |      |
|                                 |                     | 3.2      | 68.0  |      | 58.9  |      | 100.0 |         | 60.0  |      | 40.0  |      | 83.4  |      |
|                                 |                     | 4.2      | 64.0  |      | 56.3  |      | 88.9  |         | 48.0  |      | 41.7  |      | 100.0 |      |
|                                 |                     |          | 65.0  | 7.3  | 63.5  | 20.9 | 98.6  | 3.9     | 74.5  | 15.4 | 59.2  | 21.8 | 97.9  | 5.9  |
| <b>cha-GAL4 + 0 GAL80</b>       |                     |          |       |      |       |      |       |         |       |      |       |      |       |      |
| cha-GAL4                        | UAS-grim            | 1.1      | 96.0  |      | 0.0   |      | 0.0   |         | 100.0 |      | 0.0   |      | 0.0   |      |
|                                 |                     | 2.1      | 96.0  |      | 0.0   |      | 0.0   |         | 100.0 |      | 0.0   |      | 0.0   |      |
|                                 |                     | 3.1      | 100.0 |      | 0.0   |      | 0.0   |         | 92.0  |      | 0.0   |      | 0.0   |      |
|                                 |                     | 4.1      | 100.0 |      | 0.0   |      | 0.0   |         | 92.0  |      | 0.0   |      | 0.0   |      |
|                                 |                     | 1.2      | 96.0  |      | 0.0   |      | 0.0   |         | 100.0 |      | 0.0   |      | 0.0   |      |
|                                 |                     | 2.2      | 100.0 |      | 0.0   |      | 0.0   |         | 100.0 |      | 0.0   |      | 0.0   |      |
|                                 |                     | 3.2      | 96.0  |      | 0.0   |      | 0.0   |         | 100.0 |      | 0.0   |      | 0.0   |      |
|                                 |                     | 4.2      | 100.0 |      | 0.0   |      | 0.0   |         | 100.0 |      | 0.0   |      | 0.0   |      |
|                                 |                     |          | 98.0  | 2.1  | 0.0   | 0.0  | 0.0   | 0.0     | 98.0  | 3.7  | 0.0   | 0.0  | 0.0   | 0.0  |
| <b>0 GAL80</b>                  |                     |          |       |      |       |      |       |         |       |      |       |      |       |      |
| cha-GAL4                        | w                   | 1.1      | 100.0 |      | 92.0  |      | 100.0 |         | 100.0 |      | 88.0  |      | 86.4  |      |
|                                 |                     | 2.1      | 100.0 |      | 88.0  |      | 100.0 |         | 100.0 |      | 92.0  |      | 87.0  |      |
|                                 |                     | 3.1      | 100.0 |      | 92.0  |      | 91.4  |         | 96.0  |      | 95.9  |      | 47.9  |      |
|                                 |                     | 4.1      | 100.0 |      | 92.0  |      | 100.0 |         | 92.0  |      | 87.0  |      | 75.0  |      |
|                                 |                     | 1.2      | 96.0  |      | 95.9  |      | 100.0 |         | 100.0 |      | 84.0  |      | 100.0 |      |
|                                 |                     | 2.2      | 96.0  |      | 87.5  |      | 100.0 |         | 100.0 |      | 92.0  |      | 100.0 |      |
|                                 |                     | 3.2      | 100.0 |      | 80.0  |      | 100.0 |         | 100.0 |      | 84.0  |      | 100.0 |      |
|                                 |                     | 4.2      | 100.0 |      | 88.0  |      | 100.0 |         | 96.0  |      | 100.0 |      | 100.0 |      |
|                                 |                     |          | 99.0  | 1.9  | 89.4  | 4.8  | 98.9  | 3.0     | 98.0  | 3.0  | 90.4  | 5.7  | 87.0  | 18.3 |
| <b>cha-GAL4 + DJ1077</b>        |                     |          |       |      |       |      |       |         |       |      |       |      |       |      |
| cha-GAL4                        | UAS-grim;DJ1077     | 1.1      | 96.0  |      | 0.0   |      | 0.0   |         | 88.0  |      | 0.0   |      | 0.0   |      |
|                                 |                     | 2.1      | 100.0 |      | 0.0   |      | 0.0   |         | 92.0  |      | 0.0   |      | 0.0   |      |
|                                 |                     | 3.1      | 96.0  |      | 0.0   |      | 0.0   |         | 92.0  |      | 0.0   |      | 0.0   |      |
|                                 |                     | 4.1      | 88.0  |      | 0.0   |      | 0.0   |         | 96.0  |      | 0.0   |      | 0.0   |      |
|                                 |                     |          | 95.0  | 5.0  | 0.0   | 0.0  | 0.0   | 0.0     | 92.0  | 3.3  | 0.0   | 0.0  | 0.0   | 0.0  |
| <b>cha-GAL4 + 3.3</b>           |                     |          |       |      |       |      |       |         |       |      |       |      |       |      |
| cha-GAL4                        | UAS-grim;3.3        | 1.1      | 88.0  |      | 0.0   |      | 0.0   |         | 92.0  |      | 0.0   |      | 0.0   |      |
|                                 |                     | 2.1      | 88.0  |      | 0.0   |      | 1.0   |         | 100.0 |      | 0.0   |      | 0.0   |      |
|                                 |                     | 3.1      | 100.0 |      | 0.0   |      | 2.0   |         | 100.0 |      | 0.0   |      | 0.0   |      |
|                                 |                     | 4.1      | 92.0  |      | 0.0   |      | 3.0   |         | 100.0 |      | 0.0   |      | 0.0   |      |
|                                 |                     |          | 92.0  | 5.7  | 0.0   | 0.0  | 1.5   | 1.3     | 98.0  | 4.0  | 0.0   | 0.0  | 0.0   | 0.0  |
| <b>cha-GAL4 + 1X146 + 1X147</b> |                     |          |       |      |       |      |       |         |       |      |       |      |       |      |
| cha-GAL4                        | UAS-grim;2.1+DJ1077 | 1.1      | 96.0  |      | 0.0   |      | 0.0   |         | 92.0  |      | 0.0   |      | 0.0   |      |
|                                 |                     | 2.1      | 92.0  |      | 0.0   |      | 0.0   |         | 84.0  |      | 0.0   |      | 0.0   |      |
|                                 |                     | 3.1      | 88.0  |      | 0.0   |      | 0.0   |         | 72.0  |      | 0.0   |      | 0.0   |      |
|                                 |                     | 4.1      | 80.0  |      | 0.0   |      | 0.0   |         | 84.0  |      | 0.0   |      | 0.0   |      |
| cha-GAL4                        | UAS-grim;2.1+DJ1079 | 1.2      | 96.0  |      | 4.2   |      | 0.0   |         | 76.0  |      | 0.0   |      | 0.0   |      |
|                                 |                     | 2.2      | 84.0  |      | 9.6   |      | 0.0   |         | 100.0 |      | 0.0   |      | 0.0   |      |
|                                 |                     | 3.2      | 72.0  |      | 0.0   |      | 0.0   |         | 96.0  |      | 0.0   |      | 0.0   |      |
|                                 |                     | 4.2      | 80.0  |      | 0.0   |      | 0.0   |         | 84.0  |      | 0.0   |      | 0.0   |      |
|                                 |                     |          | 86.0  | 8.6  | 1.7   | 3.5  | 0.0   | 0.0     | 86.0  | 9.6  | 0.0   | 0.0  | 0.0   | 0.0  |
| <b>ddc-GAL4 + 0 GAL80</b>       |                     |          |       |      |       |      |       |         |       |      |       |      |       |      |
| ddc-GAL4                        | UAS-grim            | 1.1      | 76.0  |      | 0.0   |      | 0.0   |         | 76.0  |      | 0.0   |      | 0.0   |      |
|                                 |                     | 2.1      | 80.0  |      | 0.0   |      | 0.0   |         | 72.0  |      | 0.0   |      | 0.0   |      |
|                                 |                     | 3.1      | 76.0  |      | 0.0   |      | 0.0   |         | 76.0  |      | 0.0   |      | 0.0   |      |
|                                 |                     | 4.1      | 64.0  |      | 0.0   |      | 0.0   |         | 72.0  |      | 0.0   |      | 0.0   |      |
|                                 |                     | 1.2      | 84.0  |      | 0.0   |      | 0.0   |         | 96.0  |      | 0.0   |      | 0.0   |      |
|                                 |                     | 2.2      | 92.0  |      | 0.0   |      | 0.0   |         | 84.0  |      | 0.0   |      | 0.0   |      |
|                                 |                     | 3.2      | 92.0  |      | 0.0   |      | 0.0   |         | 84.0  |      | 0.0   |      | 0.0   |      |
|                                 |                     | 4.2      | 92.0  |      | 0.0   |      | 0.0   |         | 88.0  |      | 0.0   |      | 0.0   |      |
|                                 |                     |          | 82.0  | 10.0 | 0.0   | 0.0  | 0.0   | 0.0     | 81.0  | 8.5  | 0.0   | 0.0  | 0.0   | 0.0  |

| 11 of 17 Parents                |                     | Plate #. | %L1   | SD  | %P    | SD   | %A    | SD      | %L1   | SD  | %P    | SD   | %A    | SD  |
|---------------------------------|---------------------|----------|-------|-----|-------|------|-------|---------|-------|-----|-------|------|-------|-----|
| Male                            | Female              | Exp #    | AMP   |     |       |      |       | AMP/TET |       |     |       |      |       |     |
| <b>0 GAL80</b>                  |                     |          |       |     |       |      |       |         |       |     |       |      |       |     |
| ddc-GAL4                        | w                   | 1.1      | 92.0  |     | 91.4  |      | 95.3  |         | 96.0  |     | 83.4  |      | 90.0  |     |
|                                 |                     | 2.1      | 96.0  |     | 95.9  |      | 95.7  |         | 100.0 |     | 100.0 |      | 92.0  |     |
|                                 |                     | 3.1      | 96.0  |     | 95.9  |      | 95.7  |         | 96.0  |     | 100.0 |      | 95.9  |     |
|                                 |                     | 4.1      | 100.0 |     | 100.0 |      | 96.0  |         | 100.0 |     | 88.0  |      | 95.5  |     |
|                                 |                     | 1.2      | 100.0 |     | 84.0  |      | 95.3  |         | 88.0  |     | 86.4  |      | 100.0 |     |
|                                 |                     | 2.2      | 100.0 |     | 96.0  |      | 100.0 |         | 88.0  |     | 81.9  |      | 100.0 |     |
|                                 |                     | 3.2      | 100.0 |     | 72.0  |      | 100.0 |         | 96.0  |     | 83.4  |      | 90.0  |     |
|                                 |                     | 4.2      | 100.0 |     | 76.0  |      | 100.0 |         | 96.0  |     | 83.4  |      | 100.0 |     |
|                                 |                     |          | 98.0  | 3.0 | 88.9  | 10.4 | 97.3  | 2.3     | 95.0  | 4.7 | 88.3  | 7.5  | 95.4  | 4.4 |
| <b>ddc-GAL4 + DJ1077</b>        |                     |          |       |     |       |      |       |         |       |     |       |      |       |     |
| ddc-GAL4                        | UAS-grim;DJ1077     | 1.1      | 92.0  |     | 0.0   |      | 0.0   |         | 92.0  |     | 0.0   |      | 0.0   |     |
|                                 |                     | 2.1      | 88.0  |     | 0.0   |      | 0.0   |         | 100.0 |     | 0.0   |      | 0.0   |     |
|                                 |                     | 3.1      | 88.0  |     | 0.0   |      | 0.0   |         | 92.0  |     | 0.0   |      | 0.0   |     |
|                                 |                     | 4.1      | 80.0  |     | 0.0   |      | 0.0   |         | 80.0  |     | 0.0   |      | 0.0   |     |
|                                 |                     |          | 87.0  | 5.0 | 0.0   | 0.0  | 0.0   | 0.0     | 91.0  | 8.2 | 0.0   | 0.0  | 0.0   | 0.0 |
| <b>ddc-GAL4 + 3.3</b>           |                     |          |       |     |       |      |       |         |       |     |       |      |       |     |
| ddc-GAL4                        | UAS-grim;3.3        | 1.1      | 92.0  |     | 0.0   |      | 0.0   |         | 100.0 |     | 0.0   |      | 0.0   |     |
|                                 |                     | 2.1      | 92.0  |     | 0.0   |      | 0.0   |         | 88.0  |     | 0.0   |      | 0.0   |     |
|                                 |                     | 3.1      | 96.0  |     | 0.0   |      | 0.0   |         | 100.0 |     | 0.0   |      | 0.0   |     |
|                                 |                     | 4.1      | 84.0  |     | 0.0   |      | 0.0   |         | 100.0 |     | 0.0   |      | 0.0   |     |
|                                 |                     |          | 91.0  | 5.0 | 0.0   | 0.0  | 0.0   | 0.0     | 97.0  | 6.0 | 0.0   | 0.0  | 0.0   | 0.0 |
| <b>ddc-GAL4 + 1X146 + 1X147</b> |                     |          |       |     |       |      |       |         |       |     |       |      |       |     |
| ddc-GAL4                        | UAS-grim;2.1+DJ1077 | 1.1      | 88.0  |     | 0.0   |      | 0.0   |         | 88.0  |     | 0.0   |      | 0.0   |     |
|                                 |                     | 2.1      | 88.0  |     | 0.0   |      | 0.0   |         | 84.0  |     | 0.0   |      | 0.0   |     |
|                                 |                     | 3.1      | 88.0  |     | 0.0   |      | 0.0   |         | 88.0  |     | 0.0   |      | 0.0   |     |
|                                 |                     | 4.1      | 88.0  |     | 0.0   |      | 0.0   |         | 88.0  |     | 0.0   |      | 0.0   |     |
| ddc-GAL4                        | UAS-grim;2.1+DJ1079 | 1.2      | 76.0  |     | 0.0   |      | 0.0   |         | 92.0  |     | 0.0   |      | 0.0   |     |
|                                 |                     | 2.2      | 64.0  |     | 0.0   |      | 0.0   |         | 84.0  |     | 0.0   |      | 0.0   |     |
|                                 |                     | 3.2      | 76.0  |     | 0.0   |      | 0.0   |         | 88.0  |     | 0.0   |      | 0.0   |     |
|                                 |                     | 4.2      | 68.0  |     | 0.0   |      | 0.0   |         | 72.0  |     | 0.0   |      | 0.0   |     |
|                                 |                     |          | 79.5  | 9.9 | 0.0   | 0.0  | 0.0   | 0.0     | 85.5  | 6.0 | 0.0   | 0.0  | 0.0   | 0.0 |
| <b>Nrv2-GAL4 + 0 GAL80</b>      |                     |          |       |     |       |      |       |         |       |     |       |      |       |     |
| Nrv2-GAL4                       | UAS-grim            | 1.1      | 96.0  |     | 0.0   |      | 0.0   |         | 84.0  |     | 0.0   |      | 0.0   |     |
|                                 |                     | 2.1      | 80.0  |     | 0.0   |      | 0.0   |         | 92.0  |     | 0.0   |      | 0.0   |     |
|                                 |                     | 3.1      | 96.0  |     | 0.0   |      | 0.0   |         | 92.0  |     | 0.0   |      | 0.0   |     |
|                                 |                     | 4.1      | 84.0  |     | 0.0   |      | 0.0   |         | 76.0  |     | 0.0   |      | 0.0   |     |
|                                 |                     | 1.2      | 92.0  |     | 0.0   |      | 0.0   |         | 96.0  |     | 0.0   |      | 0.0   |     |
|                                 |                     | 2.2      | 96.0  |     | 0.0   |      | 0.0   |         | 100.0 |     | 0.0   |      | 0.0   |     |
|                                 |                     | 3.2      | 100.0 |     | 0.0   |      | 0.0   |         | 96.0  |     | 0.0   |      | 0.0   |     |
|                                 |                     | 4.2      | 96.0  |     | 0.0   |      | 0.0   |         | 100.0 |     | 0.0   |      | 0.0   |     |
|                                 |                     |          | 92.5  | 6.9 | 0.0   | 0.0  | 0.0   | 0.0     | 92.0  | 8.3 | 0.0   | 0.0  | 0.0   | 0.0 |
| <b>0 GAL80</b>                  |                     |          |       |     |       |      |       |         |       |     |       |      |       |     |
| Nrv2-GAL4                       | w                   | 1.1      | 88.0  |     | 86.4  |      | 89.5  |         | 84.0  |     | 90.5  |      | 100.0 |     |
|                                 |                     | 2.1      | 96.0  |     | 75.0  |      | 100.0 |         | 96.0  |     | 95.9  |      | 95.7  |     |
|                                 |                     | 3.1      | 100.0 |     | 84.0  |      | 100.0 |         | 84.0  |     | 81.0  |      | 82.4  |     |
|                                 |                     | 4.1      | 96.0  |     | 87.5  |      | 95.3  |         | 96.0  |     | 66.7  |      | 100.0 |     |
|                                 |                     | 1.2      | 100.0 |     | 92.0  |      | 100.0 |         | 100.0 |     | 88.0  |      | 100.0 |     |
|                                 |                     | 2.2      | 100.0 |     | 92.0  |      | 100.0 |         | 92.0  |     | 100.0 |      | 100.0 |     |
|                                 |                     | 3.2      | 100.0 |     | 92.0  |      | 95.7  |         | 100.0 |     | 100.0 |      | 100.0 |     |
|                                 |                     | 4.2      | 100.0 |     | 80.0  |      | 100.0 |         | 96.0  |     | 87.5  |      | 95.3  |     |
|                                 |                     |          | 97.5  | 4.2 | 86.1  | 6.2  | 97.6  | 3.8     | 93.5  | 6.4 | 88.7  | 11.1 | 96.7  | 6.1 |
| <b>Nrv2-GAL4 + DJ1077</b>       |                     |          |       |     |       |      |       |         |       |     |       |      |       |     |
| Nrv2-GAL4                       | UAS-grim;DJ1077     | 1.1      | 92.0  |     | 0.0   |      | 0.0   |         | 96.0  |     | 0.0   |      | 0.0   |     |
|                                 |                     | 2.1      | 80.0  |     | 0.0   |      | 0.0   |         | 96.0  |     | 0.0   |      | 0.0   |     |
|                                 |                     | 3.1      | 80.0  |     | 0.0   |      | 0.0   |         | 100.0 |     | 0.0   |      | 0.0   |     |
|                                 |                     | 4.1      | 88.0  |     | 0.0   |      | 0.0   |         | 96.0  |     | 0.0   |      | 0.0   |     |
|                                 |                     |          | 85.0  | 6.0 | 0.0   | 0.0  | 0.0   | 0.0     | 97.0  | 2.0 | 0.0   | 0.0  | 0.0   | 0.0 |
| <b>Nrv2-GAL4 + 3.3</b>          |                     |          |       |     |       |      |       |         |       |     |       |      |       |     |
| Nrv2-GAL4                       | UAS-grim;3.3        | 1.1      | 76.0  |     | 0.0   |      | 0.0   |         | 100.0 |     | 0.0   |      | 0.0   |     |
|                                 |                     | 2.1      | 72.0  |     | 0.0   |      | 0.0   |         | 96.0  |     | 0.0   |      | 0.0   |     |
|                                 |                     | 3.1      | 68.0  |     | 0.0   |      | 0.0   |         | 96.0  |     | 0.0   |      | 0.0   |     |
|                                 |                     | 4.1      | 76.0  |     | 0.0   |      | 0.0   |         | 92.0  |     | 0.0   |      | 0.0   |     |
|                                 |                     |          | 73.0  | 3.8 | 0.0   | 0.0  | 0.0   | 0.0     | 96.0  | 3.3 | 0.0   | 0.0  | 0.0   | 0.0 |

| 12 of 17 Parents                 |                     | Plate #. | %L1   | SD   | %P    | SD   | %A    | SD      | %L1   | SD   | %P    | SD   | %A    | SD  |
|----------------------------------|---------------------|----------|-------|------|-------|------|-------|---------|-------|------|-------|------|-------|-----|
| Male                             | Female              | Exp #    | AMP   |      |       |      |       | AMP/TET |       |      |       |      |       |     |
| <b>Nrv2-GAL4 + 1X146 + 1X147</b> |                     |          |       |      |       |      |       |         |       |      |       |      |       |     |
| Nrv2-GAL4                        | UAS-grim;2.1+DJ1077 | 1.1      | 80.0  |      | 25.0  |      | 40.0  |         | 72.0  |      | 16.7  |      | 0.0   |     |
|                                  |                     | 2.1      | 84.0  |      | 42.9  |      | 55.6  |         | 72.0  |      | 33.4  |      | 0.0   |     |
|                                  |                     | 3.1      | 68.0  |      | 47.1  |      | 62.5  |         | 76.0  |      | 21.1  |      | 0.0   |     |
|                                  |                     | 4.1      | 84.0  |      | 42.9  |      | 77.8  |         | 88.0  |      | 27.3  |      | 0.0   |     |
| Nrv2-GAL4                        | UAS-grim;2.1+DJ1079 | 1.2      | 88.0  |      | 63.7  |      | 64.3  |         | 68.0  |      | 23.6  |      | 0.0   |     |
|                                  |                     | 2.2      | 68.0  |      | 64.8  |      | 54.6  |         | 80.0  |      | 40.0  |      | 0.0   |     |
|                                  |                     | 3.2      | 84.0  |      | 62.0  |      | 84.7  |         | 80.0  |      | 35.0  |      | 0.0   |     |
|                                  |                     | 4.2      | 80.0  |      | 45.0  |      | 66.7  |         | 76.0  |      | 21.1  |      | 0.0   |     |
|                                  |                     |          | 79.5  | 7.5  | 49.2  | 13.7 | 63.3  | 13.9    | 76.5  | 6.2  | 27.3  | 8.1  | 0.0   | 0.0 |
| <b>DJ755 + 0 GAL80</b>           |                     |          |       |      |       |      |       |         |       |      |       |      |       |     |
| DJ755                            | UAS-grim            | 1.1      | 0.0   |      | 0.0   |      | 0.0   |         | 0.0   |      | 0.0   |      | 0.0   |     |
|                                  |                     | 2.1      | 0.0   |      | 0.0   |      | 0.0   |         | 0.0   |      | 0.0   |      | 0.0   |     |
|                                  |                     | 3.1      | 0.0   |      | 0.0   |      | 0.0   |         | 0.0   |      | 0.0   |      | 0.0   |     |
|                                  |                     | 4.1      | 0.0   |      | 0.0   |      | 0.0   |         | 0.0   |      | 0.0   |      | 0.0   |     |
|                                  |                     |          | 0.0   | 0.0  | 0.0   | 0.0  | 0.0   | 0.0     | 0.0   | 0.0  | 0.0   | 0.0  | 0.0   | 0.0 |
| <b>0 GAL80</b>                   |                     |          |       |      |       |      |       |         |       |      |       |      |       |     |
| DJ755                            | w                   | 1.1      | 96.0  |      | 91.7  |      | 100.0 |         | 96.0  |      | 95.9  |      | 100.0 |     |
|                                  |                     | 2.1      | 100.0 |      | 100.0 |      | 100.0 |         | 96.0  |      | 100.0 |      | 100.0 |     |
|                                  |                     | 3.1      | 92.0  |      | 100.0 |      | 95.7  |         | 96.0  |      | 100.0 |      | 91.7  |     |
|                                  |                     | 4.1      | 100.0 |      | 100.0 |      | 100.0 |         | 84.0  |      | 90.5  |      | 100.0 |     |
|                                  |                     |          | 97.0  | 3.8  | 97.9  | 4.2  | 98.9  | 2.2     | 93.0  | 6.0  | 96.6  | 4.5  | 97.9  | 4.2 |
| <b>DJ755 + DJ1077</b>            |                     |          |       |      |       |      |       |         |       |      |       |      |       |     |
| DJ755                            | UAS-grim;DJ1077     | 1.1      | 64.0  |      | 0.0   |      | 0.0   |         | 68.0  |      | 0.0   |      | 0.0   |     |
|                                  |                     | 2.1      | 56.0  |      | 0.0   |      | 0.0   |         | 80.0  |      | 0.0   |      | 0.0   |     |
|                                  |                     | 3.1      | 52.0  |      | 0.0   |      | 0.0   |         | 72.0  |      | 0.0   |      | 0.0   |     |
|                                  |                     | 4.1      | 68.0  |      | 0.0   |      | 0.0   |         | 72.0  |      | 0.0   |      | 0.0   |     |
|                                  |                     |          | 60.0  | 7.3  | 0.0   | 0.0  | 0.0   | 0.0     | 73.0  | 5.0  | 0.0   | 0.0  | 0.0   | 0.0 |
| <b>DJ755 + 3.3</b>               |                     |          |       |      |       |      |       |         |       |      |       |      |       |     |
| DJ755                            | UAS-grim;3.3        | 1.1      | 0.0   |      | 0.0   |      | 0.0   |         | 0.0   |      | 0.0   |      | 0.0   |     |
|                                  |                     | 2.1      | 0.0   |      | 0.0   |      | 0.0   |         | 0.0   |      | 0.0   |      | 0.0   |     |
|                                  |                     | 3.1      | 0.0   |      | 0.0   |      | 0.0   |         | 0.0   |      | 0.0   |      | 0.0   |     |
|                                  |                     | 4.1      | 0.0   |      | 0.0   |      | 0.0   |         | 0.0   |      | 0.0   |      | 0.0   |     |
|                                  |                     |          | 0.0   | 0.0  | 0.0   | 0.0  | 0.0   | 0.0     | 0.0   | 0.0  | 0.0   | 0.0  | 0.0   | 0.0 |
| <b>DJ755 + 1X146 + 1X147</b>     |                     |          |       |      |       |      |       |         |       |      |       |      |       |     |
| DJ755                            | UAS-grim;2.1+DJ1077 | 1.1      | 84.0  |      | 57.2  |      | 0.0   |         | 24.0  |      | 0.0   |      | 0.0   |     |
|                                  |                     | 2.1      | 80.0  |      | 55.0  |      | 0.0   |         | 84.0  |      | 0.0   |      | 0.0   |     |
|                                  |                     | 3.1      | 80.0  |      | 55.0  |      | 0.0   |         | 76.0  |      | 0.0   |      | 0.0   |     |
|                                  |                     | 4.1      | 76.0  |      | 42.2  |      | 0.0   |         | 76.0  |      | 0.0   |      | 0.0   |     |
| DJ755                            | UAS-grim;2.1+DJ1079 | 1.2      | 40.0  |      | 50.0  |      | 0.0   |         | 48.0  |      | 25.0  |      | 0.0   |     |
|                                  |                     | 2.2      | 80.0  |      | 50.0  |      | 0.0   |         | 32.0  |      | 25.0  |      | 0.0   |     |
|                                  |                     | 3.2      | 76.0  |      | 47.4  |      | 0.0   |         | 40.0  |      | 10.0  |      | 0.0   |     |
|                                  |                     | 4.2      | 48.0  |      | 33.4  |      | 0.0   |         | 68.0  |      | 17.7  |      | 0.0   |     |
|                                  |                     |          | 70.5  | 16.7 | 48.8  | 7.9  | 0.0   | 0.0     | 56.0  | 22.8 | 9.7   | 11.4 | 0.0   | 0.0 |
| <b>DJ756 + 0 GAL80</b>           |                     |          |       |      |       |      |       |         |       |      |       |      |       |     |
| DJ756                            | UAS-grim            | 1.1      | 0.0   |      | 0.0   |      | 0.0   |         | 0.0   |      | 0.0   |      | 0.0   |     |
|                                  |                     | 2.1      | 0.0   |      | 0.0   |      | 0.0   |         | 0.0   |      | 0.0   |      | 0.0   |     |
|                                  |                     | 3.1      | 0.0   |      | 0.0   |      | 0.0   |         | 0.0   |      | 0.0   |      | 0.0   |     |
|                                  |                     | 4.1      | 0.0   |      | 0.0   |      | 0.0   |         | 0.0   |      | 0.0   |      | 0.0   |     |
|                                  |                     |          | 0.0   | 0.0  | 0.0   | 0.0  | 0.0   | 0.0     | 0.0   | 0.0  | 0.0   | 0.0  | 0.0   | 0.0 |
| <b>0 GAL80</b>                   |                     |          |       |      |       |      |       |         |       |      |       |      |       |     |
| DJ756                            | w                   | 1.1      | 92.0  |      | 100.0 |      | 100.0 |         | 96.0  |      | 91.7  |      | 100.0 |     |
|                                  |                     | 2.1      | 92.0  |      | 91.4  |      | 100.0 |         | 84.0  |      | 81.0  |      | 100.0 |     |
|                                  |                     | 3.1      | 96.0  |      | 87.5  |      | 100.0 |         | 92.0  |      | 87.0  |      | 100.0 |     |
|                                  |                     | 4.1      | 96.0  |      | 91.7  |      | 100.0 |         | 100.0 |      | 92.0  |      | 100.0 |     |
|                                  |                     |          | 94.0  | 2.3  | 92.7  | 5.3  | 100.0 | 0.0     | 93.0  | 6.8  | 87.9  | 5.2  | 100.0 | 0.0 |
| <b>DJ756 + DJ1077</b>            |                     |          |       |      |       |      |       |         |       |      |       |      |       |     |
| DJ756                            | UAS-grim;DJ1077     | 1.1      | 60.0  |      | 0.0   |      | 0.0   |         | 56.0  |      | 0.0   |      | 0.0   |     |
|                                  |                     | 2.1      | 48.0  |      | 0.0   |      | 1.0   |         | 56.0  |      | 0.0   |      | 1.0   |     |
|                                  |                     | 3.1      | 52.0  |      | 0.0   |      | 2.0   |         | 72.0  |      | 0.0   |      | 2.0   |     |
|                                  |                     | 4.1      | 52.0  |      | 0.0   |      | 3.0   |         | 56.0  |      | 0.0   |      | 3.0   |     |
|                                  |                     |          | 53.0  | 5.0  | 0.0   | 0.0  | 1.5   | 1.3     | 60.0  | 8.0  | 0.0   | 0.0  | 1.5   | 1.3 |



| 13 of 17 Parents             |                     | Plate #. | %L1   | SD   | %P    | SD   | %A    | SD   | %L1     | SD   | %P   | SD  | %A    | SD   |
|------------------------------|---------------------|----------|-------|------|-------|------|-------|------|---------|------|------|-----|-------|------|
| Male                         | Female              | Exp #    | AMP   |      |       |      |       |      | AMP/TET |      |      |     |       |      |
| <b>DJ756 + 3.3</b>           |                     |          |       |      |       |      |       |      |         |      |      |     |       |      |
| DJ756                        | UAS-grim;3.3        | 1.1      | 0.0   |      | 0.0   |      | 0.0   |      | 0.0     |      | 0.0  |     | 0.0   |      |
|                              |                     | 2.1      | 0.0   |      | 0.0   |      | 0.0   |      | 0.0     |      | 0.0  |     | 0.0   |      |
|                              |                     | 3.1      | 0.0   |      | 0.0   |      | 0.0   |      | 0.0     |      | 0.0  |     | 0.0   |      |
|                              |                     | 4.1      | 0.0   |      | 0.0   |      | 0.0   |      | 0.0     |      | 0.0  |     | 0.0   |      |
|                              |                     |          | 0.0   | 0.0  | 0.0   | 0.0  | 0.0   | 0.0  | 0.0     | 0.0  | 0.0  | 0.0 | 0.0   | 0.0  |
| <b>DJ756 + 1X146 + 1X147</b> |                     |          |       |      |       |      |       |      |         |      |      |     |       |      |
| DJ756                        | UAS-grim;2.1+DJ1077 | 1.1      | 64.0  |      | 43.8  |      | 0.0   |      | 60.0    |      | 6.7  |     | 0.0   |      |
|                              |                     | 2.1      | 48.0  |      | 50.0  |      | 0.0   |      | 24.0    |      | 0.0  |     | 0.0   |      |
|                              |                     | 3.1      | 64.0  |      | 31.3  |      | 0.0   |      | 64.0    |      | 6.3  |     | 0.0   |      |
|                              |                     | 4.1      | 32.0  |      | 37.5  |      | 0.0   |      | 44.0    |      | 9.1  |     | 0.0   |      |
| DJ756                        | UAS-grim;2.1+DJ1079 | 1.2      | 76.0  |      | 52.7  |      | 0.0   |      | 60.0    |      | 6.7  |     | 0.0   |      |
|                              |                     | 2.2      | 68.0  |      | 47.1  |      | 0.0   |      | 68.0    |      | 0.0  |     | 0.0   |      |
|                              |                     | 3.2      | 76.0  |      | 57.9  |      | 0.0   |      | 76.0    |      | 10.6 |     | 0.0   |      |
|                              |                     | 4.2      | 60.0  |      | 53.4  |      | 0.0   |      | 80.0    |      | 20.0 |     | 0.0   |      |
|                              |                     |          | 61.0  | 14.8 | 46.7  | 8.8  | 0.0   | 0.0  | 59.5    | 18.1 | 7.4  | 6.4 | 0.0   | 0.0  |
| <b>DJ785 + 0 GAL80</b>       |                     |          |       |      |       |      |       |      |         |      |      |     |       |      |
| DJ785                        | UAS-grim            | 1.1      | 80.0  |      | 0.0   |      | 0.0   |      | 96.0    |      | 0.0  |     | 0.0   |      |
|                              |                     | 2.1      | 84.0  |      | 0.0   |      | 0.0   |      | 84.0    |      | 0.0  |     | 0.0   |      |
|                              |                     | 3.1      | 72.0  |      | 0.0   |      | 0.0   |      | 92.0    |      | 0.0  |     | 0.0   |      |
|                              |                     | 4.1      | 80.0  |      | 0.0   |      | 0.0   |      | 92.0    |      | 0.0  |     | 0.0   |      |
|                              |                     |          | 79.0  | 5.0  | 0.0   | 0.0  | 0.0   | 91.0 | 5.0     | 0.0  | 0.0  | 0.0 | 0.0   |      |
| <b>0 GAL80</b>               |                     |          |       |      |       |      |       |      |         |      |      |     |       |      |
| DJ785                        | w                   | 1.1      | 96.0  |      | 91.7  |      | 100.0 |      | 96.0    |      | 91.7 |     | 100.0 |      |
|                              |                     | 2.1      | 96.0  |      | 100.0 |      | 95.9  |      | 100.0   |      | 96.0 |     | 100.0 |      |
|                              |                     | 3.1      | 96.0  |      | 95.9  |      | 100.0 |      | 100.0   |      | 96.0 |     | 91.7  |      |
|                              |                     | 4.1      | 100.0 |      | 92.0  |      | 100.0 |      | 100.0   |      | 92.0 |     | 95.7  |      |
|                              |                     |          | 97.0  | 2.0  | 94.9  | 3.9  | 99.0  | 2.1  | 99.0    | 2.0  | 93.9 | 2.4 | 96.9  | 4.0  |
| <b>DJ785 + DJ1077</b>        |                     |          |       |      |       |      |       |      |         |      |      |     |       |      |
| DJ785                        | UAS-grim;DJ1077     | 1.1      | 84.0  |      | 0.0   |      | 0.0   |      | 80.0    |      | 0.0  |     | 0.0   |      |
|                              |                     | 2.1      | 64.0  |      | 0.0   |      | 0.0   |      | 88.0    |      | 0.0  |     | 0.0   |      |
|                              |                     | 3.1      | 84.0  |      | 0.0   |      | 0.0   |      | 88.0    |      | 0.0  |     | 0.0   |      |
|                              |                     | 4.1      | 100.0 |      | 0.0   |      | 0.0   |      | 80.0    |      | 0.0  |     | 0.0   |      |
|                              |                     |          | 83.0  | 14.7 | 0.0   | 0.0  | 0.0   | 84.0 | 4.6     | 0.0  | 0.0  | 0.0 | 0.0   |      |
| <b>DJ785 + 3.3</b>           |                     |          |       |      |       |      |       |      |         |      |      |     |       |      |
| DJ785                        | UAS-grim;3.3        | 1.1      | 80.0  |      | 0.0   |      | 0.0   |      | 80.0    |      | 0.0  |     | 0.0   |      |
|                              |                     | 2.1      | 72.0  |      | 0.0   |      | 0.0   |      | 60.0    |      | 0.0  |     | 0.0   |      |
|                              |                     | 3.1      | 68.0  |      | 0.0   |      | 0.0   |      | 84.0    |      | 0.0  |     | 0.0   |      |
|                              |                     | 4.1      | 64.0  |      | 0.0   |      | 0.0   |      | 64.0    |      | 0.0  |     | 0.0   |      |
|                              |                     |          | 71.0  | 6.8  | 0.0   | 0.0  | 0.0   | 72.0 | 11.8    | 0.0  | 0.0  | 0.0 | 0.0   |      |
| <b>DJ785 + 1X146 + 1X147</b> |                     |          |       |      |       |      |       |      |         |      |      |     |       |      |
| DJ785                        | UAS-grim;2.1+DJ1077 | 1.1      | 64.0  |      | 56.3  |      | 100.0 |      | 72.0    |      | 5.6  |     | 0.0   |      |
|                              |                     | 2.1      | 72.0  |      | 50.0  |      | 88.9  |      | 80.0    |      | 15.0 |     | 66.7  |      |
|                              |                     | 3.1      | 68.0  |      | 41.2  |      | 100.0 |      | 64.0    |      | 0.0  |     | 0.0   |      |
|                              |                     | 4.1      | 68.0  |      | 41.2  |      | 100.0 |      | 64.0    |      | 18.8 |     | 100.0 |      |
| DJ785                        | UAS-grim;2.1+DJ1079 | 1.2      | 84.0  |      | 66.7  |      | 92.9  |      | 88.0    |      | 18.2 |     | 50.0  |      |
|                              |                     | 2.2      | 92.0  |      | 78.3  |      | 94.5  |      | 88.0    |      | 22.8 |     | 40.0  |      |
|                              |                     | 3.2      | 92.0  |      | 56.6  |      | 92.4  |      | 92.0    |      | 17.4 |     | 100.0 |      |
|                              |                     | 4.2      | 96.0  |      | 54.2  |      | 100.0 |      | 96.0    |      | 16.7 |     | 50.0  |      |
|                              |                     |          | 79.5  | 12.9 | 55.6  | 12.5 | 96.1  | 4.5  | 80.5    | 12.5 | 14.3 | 7.6 | 50.8  | 38.5 |
| <b>DJ946 + 0 GAL80</b>       |                     |          |       |      |       |      |       |      |         |      |      |     |       |      |
| DJ946                        | UAS-grim            | 1.1      | 96.0  |      | 0.0   |      | 0.0   |      | 100.0   |      | 0.0  |     | 0.0   |      |
|                              |                     | 2.1      | 92.0  |      | 0.0   |      | 0.0   |      | 88.0    |      | 0.0  |     | 0.0   |      |
|                              |                     | 3.1      | 84.0  |      | 0.0   |      | 0.0   |      | 100.0   |      | 0.0  |     | 0.0   |      |
|                              |                     | 4.1      | 88.0  |      | 0.0   |      | 0.0   |      | 88.0    |      | 0.0  |     | 0.0   |      |
|                              |                     | 1.2      | 64.0  |      | 0.0   |      | 0.0   |      | 72.0    |      | 0.0  |     | 0.0   |      |
|                              |                     | 2.2      | 60.0  |      | 0.0   |      | 0.0   |      | 88.0    |      | 0.0  |     | 0.0   |      |
|                              |                     | 3.2      | 72.0  |      | 0.0   |      | 0.0   |      | 76.0    |      | 0.0  |     | 0.0   |      |
|                              |                     | 4.2      | 68.0  |      | 0.0   |      | 0.0   |      | 76.0    |      | 0.0  |     | 0.0   |      |
|                              |                     |          | 78.0  | 13.7 | 0.0   | 0.0  | 0.0   | 86.0 | 10.7    | 0.0  | 0.0  | 0.0 | 0.0   |      |

| 14 of 17 Parents              |                     | Plate #. | %L1  | SD   | %P    | SD   | %A    | SD      | %L1   | SD   | %P    | SD   | %A    | SD  |
|-------------------------------|---------------------|----------|------|------|-------|------|-------|---------|-------|------|-------|------|-------|-----|
| Male                          | Female              | Exp #    | AMP  |      |       |      |       | AMP/TET |       |      |       |      |       |     |
| <b>0 GAL80</b>                |                     |          |      |      |       |      |       |         |       |      |       |      |       |     |
| DJ946                         | w                   | 1.1      | 92.0 |      | 82.7  |      | 94.8  |         | 96.0  |      | 91.7  |      | 100.0 |     |
|                               |                     | 2.1      | 96.0 |      | 75.0  |      | 100.0 |         | 96.0  |      | 75.0  |      | 94.5  |     |
|                               |                     | 3.1      | 88.0 |      | 81.9  |      | 100.0 |         | 88.0  |      | 86.4  |      | 89.5  |     |
|                               |                     | 4.1      | 88.0 |      | 95.5  |      | 100.0 |         | 88.0  |      | 86.4  |      | 94.8  |     |
|                               |                     | 1.2      | 88.0 |      | 63.7  |      | 100.0 |         | 80.0  |      | 65.0  |      | 100.0 |     |
|                               |                     | 2.2      | 92.0 |      | 82.7  |      | 100.0 |         | 96.0  |      | 100.0 |      | 95.9  |     |
|                               |                     | 3.2      | 92.0 |      | 78.3  |      | 94.5  |         | 88.0  |      | 91.0  |      | 100.0 |     |
|                               |                     | 4.2      | 80.0 |      | 80.0  |      | 100.0 |         | 100.0 |      | 76.0  |      | 100.0 |     |
|                               |                     |          | 89.5 | 4.8  | 80.0  | 8.9  | 98.7  | 2.5     | 91.5  | 6.6  | 83.9  | 11.2 | 96.8  | 3.9 |
| <b>DJ946 + DJ1077</b>         |                     |          |      |      |       |      |       |         |       |      |       |      |       |     |
| DJ946                         | UAS-grim;DJ1077     | 1.1      | 68.0 |      | 0.0   |      | 0.0   |         | 84.0  |      | 0.0   |      | 0.0   |     |
|                               |                     | 2.1      | 72.0 |      | 0.0   |      | 0.0   |         | 84.0  |      | 0.0   |      | 0.0   |     |
|                               |                     | 3.1      | 60.0 |      | 0.0   |      | 0.0   |         | 72.0  |      | 0.0   |      | 0.0   |     |
|                               |                     | 4.1      | 72.0 |      | 0.0   |      | 0.0   |         | 64.0  |      | 0.0   |      | 0.0   |     |
|                               |                     |          | 68.0 | 5.7  | 0.0   | 0.0  | 0.0   | 0.0     | 76.0  | 9.8  | 0.0   | 0.0  | 0.0   | 0.0 |
| <b>DJ946 + 3.3</b>            |                     |          |      |      |       |      |       |         |       |      |       |      |       |     |
| DJ946                         | UAS-grim;3.3        | 1.1      | 56.0 |      | 0.0   |      | 0.0   |         | 72.0  |      | 0.0   |      | 0.0   |     |
|                               |                     | 2.1      | 72.0 |      | 0.0   |      | 0.0   |         | 80.0  |      | 0.0   |      | 0.0   |     |
|                               |                     | 3.1      | 56.0 |      | 0.0   |      | 0.0   |         | 92.0  |      | 0.0   |      | 0.0   |     |
|                               |                     | 4.1      | 48.0 |      | 0.0   |      | 0.0   |         | 76.0  |      | 0.0   |      | 0.0   |     |
|                               |                     |          | 58.0 | 10.1 | 0.0   | 0.0  | 0.0   | 0.0     | 80.0  | 8.6  | 0.0   | 0.0  | 0.0   | 0.0 |
| <b>DJ946 + 1X146 + 1X147</b>  |                     |          |      |      |       |      |       |         |       |      |       |      |       |     |
| DJ946                         | UAS-grim;2.1+DJ1077 | 1.1      | 72.0 |      | 38.9  |      | 0.0   |         | 80.0  |      | 0.0   |      | 0.0   |     |
|                               |                     | 2.1      | 76.0 |      | 42.2  |      | 0.0   |         | 68.0  |      | 0.0   |      | 0.0   |     |
|                               |                     | 3.1      | 60.0 |      | 46.7  |      | 0.0   |         | 68.0  |      | 0.0   |      | 0.0   |     |
|                               |                     | 4.1      | 68.0 |      | 41.2  |      | 0.0   |         | 80.0  |      | 0.0   |      | 0.0   |     |
| DJ946                         | UAS-grim;2.1+DJ1079 | 1.2      | 64.0 |      | 56.3  |      | 88.9  |         | 64.0  |      | 0.0   |      | 0.0   |     |
|                               |                     | 2.2      | 44.0 |      | 63.7  |      | 57.2  |         | 68.0  |      | 0.0   |      | 0.0   |     |
|                               |                     | 3.2      | 56.0 |      | 57.2  |      | 62.5  |         | 36.0  |      | 0.0   |      | 0.0   |     |
|                               |                     | 4.2      | 80.0 |      | 50.0  |      | 70.0  |         | 36.0  |      | 0.0   |      | 0.0   |     |
|                               |                     |          | 65.0 | 11.7 | 49.5  | 8.9  | 34.8  | 38.3    | 62.5  | 17.4 | 0.0   | 0.0  | 0.0   | 0.0 |
| <b>DJ1007 + 0 GAL80</b>       |                     |          |      |      |       |      |       |         |       |      |       |      |       |     |
| DJ1007                        | UAS-grim            | 1.1      | 0.0  |      | 0.0   |      | 0.0   |         | 0.0   |      | 0.0   |      | 0.0   |     |
|                               |                     | 2.1      | 0.0  |      | 0.0   |      | 0.0   |         | 0.0   |      | 0.0   |      | 0.0   |     |
|                               |                     | 3.1      | 0.0  |      | 0.0   |      | 0.0   |         | 0.0   |      | 0.0   |      | 0.0   |     |
|                               |                     | 4.1      | 0.0  |      | 0.0   |      | 0.0   |         | 0.0   |      | 0.0   |      | 0.0   |     |
|                               |                     |          | 0.0  | 0.0  | 0.0   | 0.0  | 0.0   | 0.0     | 0.0   | 0.0  | 0.0   | 0.0  | 0.0   | 0.0 |
| <b>0 GAL80</b>                |                     |          |      |      |       |      |       |         |       |      |       |      |       |     |
| DJ1007                        | w                   | 1.1      | 88.0 |      | 63.7  |      | 100.0 |         | 88.0  |      | 100.0 |      | 91.0  |     |
|                               |                     | 2.1      | 84.0 |      | 81.0  |      | 100.0 |         | 92.0  |      | 91.4  |      | 100.0 |     |
|                               |                     | 3.1      | 92.0 |      | 100.0 |      | 100.0 |         | 100.0 |      | 84.0  |      | 100.0 |     |
|                               |                     | 4.1      | 88.0 |      | 81.9  |      | 94.5  |         | 100.0 |      | 96.0  |      | 100.0 |     |
|                               |                     |          | 88.0 | 3.3  | 81.7  | 14.8 | 98.6  | 2.8     | 95.0  | 6.0  | 92.9  | 6.9  | 97.8  | 4.5 |
| <b>DJ1007 + DJ1077</b>        |                     |          |      |      |       |      |       |         |       |      |       |      |       |     |
| DJ1007                        | UAS-grim;DJ1077     | 1.1      | 48.0 |      | 0.0   |      | 0.0   |         | 72.0  |      | 0.0   |      | 0.0   |     |
|                               |                     | 2.1      | 68.0 |      | 0.0   |      | 0.0   |         | 64.0  |      | 0.0   |      | 0.0   |     |
|                               |                     | 3.1      | 60.0 |      | 0.0   |      | 0.0   |         | 64.0  |      | 0.0   |      | 0.0   |     |
|                               |                     | 4.1      | 80.0 |      | 0.0   |      | 0.0   |         | 68.0  |      | 0.0   |      | 0.0   |     |
|                               |                     |          | 64.0 | 13.5 | 0.0   | 0.0  | 0.0   | 0.0     | 67.0  | 3.8  | 0.0   | 0.0  | 0.0   | 0.0 |
| <b>DJ1007 + 3.3</b>           |                     |          |      |      |       |      |       |         |       |      |       |      |       |     |
| DJ1007                        | UAS-grim;3.3        | 1.1      | 0.0  |      | 0.0   |      | 0.0   |         | 0.0   |      | 0.0   |      | 0.0   |     |
|                               |                     | 2.1      | 0.0  |      | 0.0   |      | 0.0   |         | 0.0   |      | 0.0   |      | 0.0   |     |
|                               |                     | 3.1      | 0.0  |      | 0.0   |      | 0.0   |         | 0.0   |      | 0.0   |      | 0.0   |     |
|                               |                     | 4.1      | 0.0  |      | 0.0   |      | 0.0   |         | 0.0   |      | 0.0   |      | 0.0   |     |
|                               |                     |          | 0.0  | 0.0  | 0.0   | 0.0  | 0.0   | 0.0     | 0.0   | 0.0  | 0.0   | 0.0  | 0.0   | 0.0 |
| <b>DJ1007 + 1X146 + 1X147</b> |                     |          |      |      |       |      |       |         |       |      |       |      |       |     |
| DJ1007                        | UAS-grim;2.1+DJ1077 | 1.1      | 72.0 |      | 38.9  |      | 0.0   |         | 60.0  |      | 6.7   |      | 0.0   |     |
|                               |                     | 2.1      | 60.0 |      | 26.7  |      | 0.0   |         | 68.0  |      | 0.0   |      | 0.0   |     |
|                               |                     | 3.1      | 72.0 |      | 27.8  |      | 0.0   |         | 68.0  |      | 5.9   |      | 0.0   |     |
|                               |                     | 4.1      | 60.0 |      | 40.0  |      | 0.0   |         | 56.0  |      | 7.2   |      | 0.0   |     |
| DJ1007                        | UAS-grim;2.1+DJ1079 | 1.2      | 52.0 |      | 15.4  |      | 0.0   |         | 80.0  |      | 0.0   |      | 0.0   |     |
|                               |                     | 2.2      | 40.0 |      | 20.0  |      | 0.0   |         | 68.0  |      | 0.0   |      | 0.0   |     |
|                               |                     | 3.2      | 60.0 |      | 33.4  |      | 0.0   |         | 68.0  |      | 0.0   |      | 0.0   |     |
|                               |                     | 4.2      | 60.0 |      | 33.4  |      | 0.0   |         | 56.0  |      | 0.0   |      | 0.0   |     |
|                               |                     |          | 59.5 | 10.4 | 29.5  | 8.7  | 0.0   | 0.0     | 65.5  | 8.0  | 2.5   | 3.4  | 0.0   | 0.0 |

| 15 of 17 Parents              |                     | Plate #. | %L1   | SD   | %P    | SD   | %A      | SD   | %L1  | SD   | %P    | SD   | %A    | SD  |
|-------------------------------|---------------------|----------|-------|------|-------|------|---------|------|------|------|-------|------|-------|-----|
| Male                          | Female              | Exp #    | AMP   |      |       |      | AMP/TET |      |      |      |       |      |       |     |
| <b>DJ1027 + 0 GAL80</b>       |                     |          |       |      |       |      |         |      |      |      |       |      |       |     |
| DJ1027                        | UAS-grim            | 1.1      | 80.0  |      | 45.0  |      | 100.0   |      | 52.0 |      | 69.3  |      | 100.0 |     |
|                               |                     | 2.1      | 92.0  |      | 43.5  |      | 100.0   |      | 48.0 |      | 66.7  |      | 87.5  |     |
|                               |                     | 3.1      | 88.0  |      | 36.4  |      | 100.0   |      | 48.0 |      | 75.0  |      | 88.9  |     |
|                               |                     | 4.1      | 76.0  |      | 42.2  |      | 100.0   |      | 40.0 |      | 80.0  |      | 100.0 |     |
|                               |                     |          | 84.0  | 7.3  | 41.8  | 3.8  | 100.0   | 0.0  | 47.0 | 5.0  | 72.8  | 5.9  | 94.1  | 6.8 |
| <b>0 GAL80</b>                |                     |          |       |      |       |      |         |      |      |      |       |      |       |     |
| DJ1027                        | w                   | 1.1      | 96.0  |      | 100.0 |      | 100.0   |      | 92.0 |      | 100.0 |      | 100.0 |     |
|                               |                     | 2.1      | 88.0  |      | 100.0 |      | 100.0   |      | 92.0 |      | 95.7  |      | 91.0  |     |
|                               |                     | 3.1      | 92.0  |      | 87.0  |      | 100.0   |      | 96.0 |      | 91.7  |      | 100.0 |     |
|                               |                     | 4.1      | 92.0  |      | 82.7  |      | 100.0   |      | 96.0 |      | 91.7  |      | 100.0 |     |
|                               |                     |          | 92.0  | 3.3  | 92.4  | 8.9  | 100.0   | 0.0  | 94.0 | 2.3  | 94.8  | 4.0  | 97.8  | 4.5 |
| <b>DJ1027 + DJ1077</b>        |                     |          |       |      |       |      |         |      |      |      |       |      |       |     |
| DJ1027                        | UAS-grim;DJ1077     | 1.1      | 64.0  |      | 37.5  |      | 100.0   |      | 64.0 |      | 50.0  |      | 100.0 |     |
|                               |                     | 2.1      | 76.0  |      | 36.9  |      | 100.0   |      | 48.0 |      | 33.4  |      | 100.0 |     |
|                               |                     | 3.1      | 88.0  |      | 50.0  |      | 100.0   |      | 52.0 |      | 38.5  |      | 100.0 |     |
|                               |                     | 4.1      | 72.0  |      | 27.8  |      | 100.0   |      | 60.0 |      | 33.4  |      | 100.0 |     |
|                               |                     |          | 75.0  | 10.0 | 38.1  | 9.1  | 100.0   | 0.0  | 56.0 | 7.3  | 38.8  | 7.8  | 100.0 | 0.0 |
| <b>DJ1027 + 3.3</b>           |                     |          |       |      |       |      |         |      |      |      |       |      |       |     |
| DJ1027                        | UAS-grim;3.3        | 1.1      | 76.0  |      | 21.1  |      | 75.0    |      | 40.0 |      | 60.0  |      | 100.0 |     |
|                               |                     | 2.1      | 68.0  |      | 41.2  |      | 100.0   |      | 64.0 |      | 75.0  |      | 91.7  |     |
|                               |                     | 3.1      | 80.0  |      | 35.0  |      | 100.0   |      | 44.0 |      | 91.0  |      | 100.0 |     |
|                               |                     | 4.1      | 84.0  |      | 23.9  |      | 100.0   |      | 68.0 |      | 64.8  |      | 91.0  |     |
|                               |                     |          | 77.0  | 6.8  | 30.3  | 9.4  | 93.8    | 12.5 | 54.0 | 14.0 | 72.7  | 13.7 | 95.7  | 5.0 |
| <b>DJ1027 + 1X146 + 1X147</b> |                     |          |       |      |       |      |         |      |      |      |       |      |       |     |
| DJ1027                        | UAS-grim;2.1+DJ1077 | 1.1      | 92.0  |      | 39.2  |      | 77.8    |      | 92.0 |      | 52.2  |      | 91.7  |     |
|                               |                     | 2.1      | 100.0 |      | 76.0  |      | 89.5    |      | 92.0 |      | 47.9  |      | 100.0 |     |
|                               |                     | 3.1      | 80.0  |      | 75.0  |      | 66.7    |      | 84.0 |      | 47.7  |      | 100.0 |     |
|                               |                     | 4.1      | 88.0  |      | 54.6  |      | 41.7    |      | 92.0 |      | 56.6  |      | 92.4  |     |
| DJ1027                        | UAS-grim;2.1+DJ1079 | 1.2      | 76.0  |      | 57.9  |      | 27.3    |      | 76.0 |      | 21.1  |      | 100.0 |     |
|                               |                     | 2.2      | 52.0  |      | 46.2  |      | 33.4    |      | 80.0 |      | 50.0  |      | 80.0  |     |
|                               |                     | 3.2      | 60.0  |      | 73.4  |      | 27.3    |      | 64.0 |      | 56.3  |      | 77.8  |     |
|                               |                     | 4.2      | 76.0  |      | 42.2  |      | 37.5    |      | 92.0 |      | 26.1  |      | 100.0 |     |
|                               |                     |          | 78.0  | 16.0 | 58.1  | 15.1 | 50.2    | 24.3 | 84.0 | 10.3 | 44.7  | 13.5 | 92.7  | 9.2 |
| <b>DJ1040 + 0 GAL80</b>       |                     |          |       |      |       |      |         |      |      |      |       |      |       |     |
| DJ1040                        | UAS-grim            | 1.1      | 0.0   |      | 0.0   |      | 0.0     |      | 0.0  |      | 0.0   |      | 0.0   |     |
|                               |                     | 2.1      | 0.0   |      | 0.0   |      | 0.0     |      | 0.0  |      | 0.0   |      | 0.0   |     |
|                               |                     | 3.1      | 0.0   |      | 0.0   |      | 0.0     |      | 0.0  |      | 0.0   |      | 0.0   |     |
|                               |                     | 4.1      | 0.0   |      | 0.0   |      | 0.0     |      | 0.0  |      | 0.0   |      | 0.0   |     |
|                               |                     |          | 0.0   | 0.0  | 0.0   | 0.0  | 0.0     | 0.0  | 0.0  | 0.0  | 0.0   | 0.0  | 0.0   | 0.0 |
| <b>0 GAL80</b>                |                     |          |       |      |       |      |         |      |      |      |       |      |       |     |
| DJ1040                        | w                   | 1.1      | 88.0  |      | 77.3  |      | 100.0   |      | 96.0 |      | 95.9  |      | 100.0 |     |
|                               |                     | 2.1      | 96.0  |      | 91.7  |      | 95.5    |      | 96.0 |      | 95.9  |      | 95.7  |     |
|                               |                     | 3.1      | 92.0  |      | 95.7  |      | 100.0   |      | 92.0 |      | 87.0  |      | 100.0 |     |
|                               |                     | 4.1      | 88.0  |      | 86.4  |      | 100.0   |      | 96.0 |      | 75.0  |      | 94.5  |     |
|                               |                     |          | 91.0  | 3.8  | 87.8  | 8.0  | 98.9    | 2.3  | 95.0 | 2.0  | 88.5  | 9.9  | 97.6  | 2.9 |
| <b>DJ1040 + DJ1077</b>        |                     |          |       |      |       |      |         |      |      |      |       |      |       |     |
| DJ1040                        | UAS-grim;DJ1077     | 1.1      | 48.0  |      | 0.0   |      | 0.0     |      | 76.0 |      | 0.0   |      | 0.0   |     |
|                               |                     | 2.1      | 48.0  |      | 0.0   |      | 0.0     |      | 68.0 |      | 0.0   |      | 0.0   |     |
|                               |                     | 3.1      | 72.0  |      | 0.0   |      | 0.0     |      | 52.0 |      | 0.0   |      | 0.0   |     |
|                               |                     | 4.1      | 60.0  |      | 0.0   |      | 0.0     |      | 40.0 |      | 0.0   |      | 0.0   |     |
|                               |                     |          | 57.0  | 11.5 | 0.0   | 0.0  | 0.0     | 0.0  | 0.0  | 59.0 | 16.1  | 0.0  | 0.0   | 0.0 |
| <b>DJ1040 + 3.3</b>           |                     |          |       |      |       |      |         |      |      |      |       |      |       |     |
| DJ1040                        | UAS-grim;3.3        | 1.1      | 0.0   |      | 0.0   |      | 0.0     |      | 0.0  |      | 0.0   |      | 0.0   |     |
|                               |                     | 2.1      | 0.0   |      | 0.0   |      | 0.0     |      | 0.0  |      | 0.0   |      | 0.0   |     |
|                               |                     | 3.1      | 0.0   |      | 0.0   |      | 0.0     |      | 0.0  |      | 0.0   |      | 0.0   |     |
|                               |                     | 4.1      | 0.0   |      | 0.0   |      | 0.0     |      | 0.0  |      | 0.0   |      | 0.0   |     |
|                               |                     |          | 0.0   | 0.0  | 0.0   | 0.0  | 0.0     | 0.0  | 0.0  | 0.0  | 0.0   | 0.0  | 0.0   | 0.0 |

| 16 of 17 Parents              |                     | Plate #. | %L1   | SD   | %P    | SD   | %A    | SD      | %L1   | SD   | %P    | SD  | %A    | SD  |
|-------------------------------|---------------------|----------|-------|------|-------|------|-------|---------|-------|------|-------|-----|-------|-----|
| Male                          | Female              | Exp #    | AMP   |      |       |      |       | AMP/TET |       |      |       |     |       |     |
| <b>DJ1040 + 1X146 + 1X147</b> |                     |          |       |      |       |      |       |         |       |      |       |     |       |     |
| DJ1040                        | UAS-grim;2.1+DJ1077 | 1.1      | 72.0  |      | 61.2  |      | 0.0   |         | 84.0  |      | 4.8   |     | 0.0   |     |
|                               |                     | 2.1      | 84.0  |      | 38.1  |      | 0.0   |         | 80.0  |      | 0.0   |     | 0.0   |     |
|                               |                     | 3.1      | 80.0  |      | 50.0  |      | 0.0   |         | 76.0  |      | 0.0   |     | 0.0   |     |
|                               |                     | 4.1      | 80.0  |      | 50.0  |      | 0.0   |         | 72.0  |      | 0.0   |     | 0.0   |     |
| DJ1040                        | UAS-grim;2.1+DJ1079 | 1.2      | 56.0  |      | 92.9  |      | 0.0   |         | 64.0  |      | 0.0   |     | 0.0   |     |
|                               |                     | 2.2      | 64.0  |      | 62.5  |      | 0.0   |         | 60.0  |      | 13.4  |     | 0.0   |     |
|                               |                     | 3.2      | 68.0  |      | 41.2  |      | 0.0   |         | 60.0  |      | 13.4  |     | 0.0   |     |
|                               |                     | 4.2      | 64.0  |      | 43.8  |      | 0.0   |         | 48.0  |      | 8.4   |     | 0.0   |     |
|                               |                     |          | 71.0  | 9.7  | 55.0  | 17.7 | 0.0   | 0.0     | 68.0  | 12.1 | 5.0   | 6.0 | 0.0   | 0.0 |
| <b>DJ1072 + 0 GAL80</b>       |                     |          |       |      |       |      |       |         |       |      |       |     |       |     |
| DJ1072                        | UAS-grim            | 1.1      | 96.0  |      | 87.5  |      | 95.3  |         | 88.0  |      | 91.0  |     | 100.0 |     |
|                               |                     | 2.1      | 84.0  |      | 85.8  |      | 94.5  |         | 88.0  |      | 91.0  |     | 100.0 |     |
|                               |                     | 3.1      | 96.0  |      | 91.7  |      | 100.0 |         | 84.0  |      | 90.5  |     | 94.8  |     |
|                               |                     | 4.1      | 92.0  |      | 91.4  |      | 100.0 |         | 84.0  |      | 90.5  |     | 100.0 |     |
|                               |                     |          | 92.0  | 5.7  | 89.1  | 2.9  | 97.5  | 3.0     | 86.0  | 2.3  | 90.8  | 0.3 | 98.7  | 2.6 |
| <b>0 GAL80</b>                |                     |          |       |      |       |      |       |         |       |      |       |     |       |     |
| DJ1072                        | w                   | 1.1      | 96.0  |      | 91.7  |      | 100.0 |         | 96.0  |      | 95.9  |     | 100.0 |     |
|                               |                     | 2.1      | 96.0  |      | 79.2  |      | 100.0 |         | 100.0 |      | 92.0  |     | 100.0 |     |
|                               |                     | 3.1      | 96.0  |      | 75.0  |      | 100.0 |         | 96.0  |      | 95.9  |     | 95.7  |     |
|                               |                     | 4.1      | 92.0  |      | 100.0 |      | 100.0 |         | 92.0  |      | 100.0 |     | 100.0 |     |
|                               |                     |          | 95.0  | 2.0  | 86.5  | 11.5 | 100.0 | 0.0     | 96.0  | 3.3  | 96.0  | 3.3 | 98.9  | 2.2 |
| <b>DJ1072 + 3.3</b>           |                     |          |       |      |       |      |       |         |       |      |       |     |       |     |
| DJ1072                        | UAS-grim;3.3        | 1.1      | 88.0  |      | 72.8  |      | 100.0 |         | 88.0  |      | 100.0 |     | 95.5  |     |
|                               |                     | 2.1      | 92.0  |      | 65.3  |      | 100.0 |         | 88.0  |      | 100.0 |     | 77.3  |     |
|                               |                     | 3.1      | 92.0  |      | 69.6  |      | 100.0 |         | 80.0  |      | 100.0 |     | 80.0  |     |
|                               |                     | 4.1      | 92.0  |      | 82.7  |      | 100.0 |         | 80.0  |      | 100.0 |     | 85.0  |     |
|                               |                     |          | 91.0  | 2.0  | 72.6  | 7.4  | 100.0 | 0.0     | 84.0  | 4.6  | 100.0 | 0.0 | 84.5  | 8.0 |
| <b>DJ817 + 0 GAL80</b>        |                     |          |       |      |       |      |       |         |       |      |       |     |       |     |
| DJ817                         | UAS-grim            | 1.1      | 64.0  |      | 0.0   |      | 0.0   |         | 28.0  |      | 0.0   |     | 0.0   |     |
|                               |                     | 2.1      | 52.0  |      | 0.0   |      | 0.0   |         | 36.0  |      | 0.0   |     | 0.0   |     |
|                               |                     | 3.1      | 48.0  |      | 0.0   |      | 0.0   |         | 36.0  |      | 0.0   |     | 0.0   |     |
|                               |                     | 4.1      | 40.0  |      | 0.0   |      | 0.0   |         | 44.0  |      | 0.0   |     | 0.0   |     |
|                               |                     |          | 51.0  | 10.0 | 0.0   | 0.0  | 0.0   | 0.0     | 36.0  | 6.5  | 0.0   | 0.0 | 0.0   | 0.0 |
| <b>0 GAL80</b>                |                     |          |       |      |       |      |       |         |       |      |       |     |       |     |
| DJ817                         | w                   | 1.1      | 100.0 |      | 84.0  |      | 100.0 |         | 92.0  |      | 87.0  |     | 95.0  |     |
|                               |                     | 2.1      | 96.0  |      | 100.0 |      | 100.0 |         | 92.0  |      | 100.0 |     | 100.0 |     |
|                               |                     | 3.1      | 96.0  |      | 95.9  |      | 100.0 |         | 100.0 |      | 88.0  |     | 100.0 |     |
|                               |                     | 4.1      | 92.0  |      | 82.7  |      | 100.0 |         | 88.0  |      | 91.0  |     | 100.0 |     |
|                               |                     |          | 96.0  | 3.3  | 90.7  | 8.6  | 100.0 | 0.0     | 93.0  | 5.0  | 91.5  | 5.9 | 98.8  | 2.5 |
| <b>DJ817 + DJ1077</b>         |                     |          |       |      |       |      |       |         |       |      |       |     |       |     |
| DJ817                         | UAS-grim;DJ1077     | 1.1      | 64.0  |      | 0.0   |      | 0.0   |         | 68.0  |      | 0.0   |     | 0.0   |     |
|                               |                     | 2.1      | 68.0  |      | 0.0   |      | 0.0   |         | 76.0  |      | 0.0   |     | 0.0   |     |
|                               |                     | 3.1      | 56.0  |      | 0.0   |      | 0.0   |         | 88.0  |      | 0.0   |     | 0.0   |     |
|                               |                     | 4.1      | 60.0  |      | 0.0   |      | 0.0   |         | 80.0  |      | 0.0   |     | 0.0   |     |
|                               |                     |          | 62.0  | 5.2  | 0.0   | 0.0  | 0.0   | 0.0     | 78.0  | 8.3  | 0.0   | 0.0 | 0.0   | 0.0 |
| <b>DJ817 + 3.3</b>            |                     |          |       |      |       |      |       |         |       |      |       |     |       |     |
| DJ817                         | UAS-grim;3.3        | 1.1      | 64.0  |      | 0.0   |      | 0.0   |         | 72.0  |      | 0.0   |     | 0.0   |     |
|                               |                     | 2.1      | 52.0  |      | 0.0   |      | 0.0   |         | 64.0  |      | 0.0   |     | 0.0   |     |
|                               |                     | 3.1      | 60.0  |      | 0.0   |      | 0.0   |         | 60.0  |      | 0.0   |     | 0.0   |     |
|                               |                     | 4.1      | 56.0  |      | 0.0   |      | 0.0   |         | 68.0  |      | 0.0   |     | 0.0   |     |
|                               |                     |          | 58.0  | 5.2  | 0.0   | 0.0  | 0.0   | 0.0     | 66.0  | 5.2  | 0.0   | 0.0 | 0.0   | 0.0 |
| <b>DJ817 + 1X146 + 1X147</b>  |                     |          |       |      |       |      |       |         |       |      |       |     |       |     |
| DJ817                         | UAS-grim;2.1+DJ1077 | 1.1      | 92.0  |      | 26.1  |      | 0.0   |         | 72.0  |      | 0.0   |     | 0.0   |     |
|                               |                     | 2.1      | 80.0  |      | 25.0  |      | 0.0   |         | 68.0  |      | 0.0   |     | 0.0   |     |
|                               |                     | 3.1      | 80.0  |      | 35.0  |      | 0.0   |         | 60.0  |      | 0.0   |     | 0.0   |     |
|                               |                     | 4.1      | 72.0  |      | 44.5  |      | 0.0   |         | 48.0  |      | 0.0   |     | 0.0   |     |
| DJ817                         | UAS-grim;2.1+DJ1079 | 1.2      | 56.0  |      | 21.5  |      | 0.0   |         | 48.0  |      | 0.0   |     | 0.0   |     |
|                               |                     | 2.2      | 60.0  |      | 26.7  |      | 0.0   |         | 60.0  |      | 0.0   |     | 0.0   |     |
|                               |                     | 3.2      | 56.0  |      | 35.8  |      | 0.0   |         | 56.0  |      | 0.0   |     | 0.0   |     |
|                               |                     | 4.2      | 64.0  |      | 25.0  |      | 0.0   |         | 52.0  |      | 0.0   |     | 0.0   |     |
|                               |                     |          | 70.0  | 13.2 | 30.0  | 7.7  | 0.0   | 0.0     | 58.0  | 8.8  | 0.0   | 0.0 | 0.0   | 0.0 |

| 17 of 17 Parents                |                     | Plate #. | %L1  | SD   | %P   | SD  | %A      | SD  | %L1   | SD  | %P    | SD  | %A    | SD  |
|---------------------------------|---------------------|----------|------|------|------|-----|---------|-----|-------|-----|-------|-----|-------|-----|
| Male                            | Female              | Exp #    | AMP  |      |      |     | AMP/TET |     |       |     |       |     |       |     |
| <b>GAL4.109 + 0 GAL80</b>       |                     |          |      |      |      |     |         |     |       |     |       |     |       |     |
| GAL4.109                        | UAS-grim            | 1.1      | 84.0 |      | 0.0  |     | 0.0     |     | 100.0 |     | 0.0   |     | 0.0   |     |
|                                 |                     | 2.1      | 92.0 |      | 0.0  |     | 0.0     |     | 100.0 |     | 0.0   |     | 0.0   |     |
|                                 |                     | 3.1      | 88.0 |      | 0.0  |     | 0.0     |     | 84.0  |     | 0.0   |     | 0.0   |     |
|                                 |                     | 4.1      | 88.0 |      | 0.0  |     | 0.0     |     | 96.0  |     | 0.0   |     | 0.0   |     |
|                                 |                     |          | 88.0 | 3.3  | 0.0  | 0.0 | 0.0     | 0.0 | 95.0  | 7.6 | 0.0   | 0.0 | 0.0   | 0.0 |
| <b>0 GAL80</b>                  |                     |          |      |      |      |     |         |     |       |     |       |     |       |     |
| GAL4.109                        | w                   | 1.1      | 96.0 |      | 91.7 |     | 100.0   |     | 88.0  |     | 100.0 |     | 100.0 |     |
|                                 |                     | 2.1      | 84.0 |      | 95.3 |     | 100.0   |     | 92.0  |     | 100.0 |     | 100.0 |     |
|                                 |                     | 3.1      | 96.0 |      | 91.7 |     | 100.0   |     | 96.0  |     | 91.7  |     | 100.0 |     |
|                                 |                     | 4.1      | 92.0 |      | 91.4 |     | 100.0   |     | 96.0  |     | 95.9  |     | 100.0 |     |
|                                 |                     |          | 92.0 | 5.7  | 92.5 | 1.9 | 100.0   | 0.0 | 93.0  | 3.8 | 96.9  | 4.0 | 100.0 | 0.0 |
| <b>GAL4.109 + DJ1077</b>        |                     |          |      |      |      |     |         |     |       |     |       |     |       |     |
| GAL4.109                        | UAS-grim;DJ1077     | 1.1      | 84.0 |      | 0.0  |     | 0.0     |     | 68.0  |     | 0.0   |     | 0.0   |     |
|                                 |                     | 2.1      | 84.0 |      | 0.0  |     | 0.0     |     | 80.0  |     | 0.0   |     | 0.0   |     |
|                                 |                     | 3.1      | 76.0 |      | 0.0  |     | 0.0     |     | 88.0  |     | 0.0   |     | 0.0   |     |
|                                 |                     | 4.1      | 84.0 |      | 0.0  |     | 0.0     |     | 84.0  |     | 0.0   |     | 0.0   |     |
|                                 |                     |          | 82.0 | 4.0  | 0.0  | 0.0 | 0.0     | 0.0 | 80.0  | 8.6 | 0.0   | 0.0 | 0.0   | 0.0 |
| <b>GAL4.109 + 3.3</b>           |                     |          |      |      |      |     |         |     |       |     |       |     |       |     |
| GAL4.109                        | UAS-grim;3.3        | 1.1      | 88.0 |      | 0.0  |     | 0.0     |     | 76.0  |     | 0.0   |     | 0.0   |     |
|                                 |                     | 2.1      | 84.0 |      | 0.0  |     | 0.0     |     | 72.0  |     | 0.0   |     | 0.0   |     |
|                                 |                     | 3.1      | 68.0 |      | 0.0  |     | 0.0     |     | 92.0  |     | 0.0   |     | 0.0   |     |
|                                 |                     | 4.1      | 76.0 |      | 0.0  |     | 0.0     |     | 72.0  |     | 0.0   |     | 0.0   |     |
|                                 |                     |          | 79.0 | 8.9  | 0.0  | 0.0 | 0.0     | 0.0 | 78.0  | 9.5 | 0.0   | 0.0 | 0.0   | 0.0 |
| <b>GAL4.109 + 1X146 + 1X147</b> |                     |          |      |      |      |     |         |     |       |     |       |     |       |     |
| GAL4.109                        | UAS-grim;2.1+DJ1077 | 1.1      | 68.0 |      | 0.0  |     | 0.0     |     | 76.0  |     | 0.0   |     | 0.0   |     |
|                                 |                     | 2.1      | 88.0 |      | 0.0  |     | 0.0     |     | 80.0  |     | 0.0   |     | 0.0   |     |
|                                 |                     | 3.1      | 76.0 |      | 10.6 |     | 0.0     |     | 84.0  |     | 0.0   |     | 0.0   |     |
|                                 |                     | 4.1      | 76.0 |      | 0.0  |     | 0.0     |     | 76.0  |     | 0.0   |     | 0.0   |     |
| GAL4.109                        | UAS-grim;2.1+DJ1079 | 1.2      | 52.0 |      | 0.0  |     | 0.0     |     | 72.0  |     | 0.0   |     | 0.0   |     |
|                                 |                     | 2.2      | 56.0 |      | 21.5 |     | 0.0     |     | 72.0  |     | 0.0   |     | 0.0   |     |
|                                 |                     | 3.2      | 64.0 |      | 6.3  |     | 0.0     |     | 72.0  |     | 0.0   |     | 0.0   |     |
|                                 |                     | 4.2      | 68.0 |      | 11.8 |     | 0.0     |     | 72.0  |     | 0.0   |     | 0.0   |     |
|                                 |                     |          | 68.5 | 11.6 | 6.3  | 7.9 | 0.0     | 0.0 | 75.5  | 4.5 | 0.0   | 0.0 | 0.0   | 0.0 |

# Reagents table

| Data type                           | Experimental species | Symbol/name used in publication | Source – public                     | Source – published | Source – unpublished | Identifiers | New reagent                     | Comments |
|-------------------------------------|----------------------|---------------------------------|-------------------------------------|--------------------|----------------------|-------------|---------------------------------|----------|
| genetic reagent (in whole organism) | D. melanogaster      | da-GAL4                         | Bloomington Drosophila Stock Center | PMID:7606787       |                      | BDSC:55851  |                                 |          |
| genetic reagent (in whole organism) | D. melanogaster      | tub-GAL4                        |                                     | PMID:10197526      |                      | BDSC:5138   |                                 |          |
| genetic reagent (in whole organism) | D. melanogaster      | DJ634                           | Bloomington Drosophila Stock Center | PMID:12882353      |                      | BDSC:8614   |                                 |          |
| genetic reagent (in whole organism) | D. melanogaster      | D42                             | Bloomington Drosophila Stock Center |                    |                      | BDSC:8816   |                                 |          |
| genetic reagent (in whole organism) | D. melanogaster      | 24B                             | Bloomington Drosophila Stock Center |                    |                      | BDSC:1767   |                                 |          |
| genetic reagent (in whole organism) | D. melanogaster      | ELAV                            | Bloomington Drosophila Stock Center |                    |                      | BDSC:8760   |                                 |          |
| genetic reagent (in whole organism) | D. melanogaster      | DJ646                           | Bloomington Drosophila Stock Center | PMID:12882353      |                      | BDSC:8169   |                                 |          |
| genetic reagent (in whole organism) | D. melanogaster      | DJ752                           | Bloomington Drosophila Stock Center | PMID:12882353      |                      | BDSC:8182   |                                 |          |
| genetic reagent (in whole organism) | D. melanogaster      | DJ695                           | Bloomington Drosophila Stock Center | PMID:12882353      |                      | BDSC:8177   |                                 |          |
| genetic reagent (in whole organism) | D. melanogaster      | DJ628                           | Bloomington Drosophila Stock Center | PMID:12882353      |                      | BDSC:8167   |                                 |          |
| genetic reagent (in whole organism) | D. melanogaster      | actin                           | Bloomington Drosophila Stock Center | PMID:9043058       |                      | BDSC:3954   |                                 |          |
| genetic reagent (in whole organism) | D. melanogaster      | DJ761                           | Bloomington Drosophila Stock Center | PMID:12882353      |                      | BDSC:8185   |                                 |          |
| genetic reagent (in whole organism) | D. melanogaster      | DJ715                           | Bloomington Drosophila Stock Center | PMID:12882353      |                      | BDSC:8179   |                                 |          |
| genetic reagent (in whole organism) | D. melanogaster      | DJ710                           |                                     | PMID:12882353      |                      |             |                                 |          |
| genetic reagent (in whole organism) | D. melanogaster      | DJ849                           |                                     | PMID:12882353      |                      |             |                                 |          |
| genetic reagent (in whole organism) | D. melanogaster      | cha-GAL4                        |                                     | PMID:15018821      |                      |             |                                 |          |
| genetic reagent (in whole organism) | D. melanogaster      | ddc-GAL4                        |                                     | PMID:10704417      |                      |             |                                 |          |
| genetic reagent (in whole organism) | D. melanogaster      | Nrv2-GAL4                       | Bloomington Drosophila Stock Center | PMID:10468627      |                      | BDSC:6799   |                                 |          |
| genetic reagent (in whole organism) | D. melanogaster      | DJ755                           | Bloomington Drosophila Stock Center | PMID:12882353      |                      | BDSC:8183   |                                 |          |
| genetic reagent (in whole organism) | D. melanogaster      | DJ756                           |                                     | PMID:12882353      |                      |             |                                 |          |
| genetic reagent (in whole organism) | D. melanogaster      | DJ785                           |                                     | PMID:12882353      |                      |             |                                 |          |
| genetic reagent (in whole organism) | D. melanogaster      | DJ946                           |                                     | PMID:12882353      |                      |             |                                 |          |
| genetic reagent (in whole organism) | D. melanogaster      | DJ1007                          |                                     | PMID:12882353      |                      |             |                                 |          |
| genetic reagent (in whole organism) | D. melanogaster      | DJ1027                          |                                     | PMID:12882353      |                      |             |                                 |          |
| genetic reagent (in whole organism) | D. melanogaster      | DJ1040                          |                                     | PMID:12882353      |                      |             |                                 |          |
| genetic reagent (in whole organism) | D. melanogaster      | DJ817                           |                                     | PMID:12882353      |                      |             |                                 |          |
| genetic reagent (in whole organism) | D. melanogaster      | GAL4.109                        |                                     | PMID:10521399      |                      |             |                                 |          |
| genetic reagent (in whole organism) | D. melanogaster      | UAS-lacZ                        | Bloomington Drosophila Stock Center |                    |                      | BDSC:1777   |                                 |          |
| genetic reagent (in whole organism) | D. melanogaster      | UAS-GFP                         | Bloomington Drosophila Stock Center |                    |                      | BDSC:5137   |                                 |          |
| genetic reagent (in whole organism) | D. melanogaster      | UAS-grim                        |                                     | PMID:9846179       |                      |             |                                 |          |
| genetic reagent (in whole organism) | D. melanogaster      | tetO-lacZ                       |                                     | PMID:9671025       |                      |             |                                 |          |
| genetic reagent (in whole organism) | D. melanogaster      | MHC Geneswitch                  |                                     | PMID:11675495      |                      |             |                                 |          |
| genetic reagent (in whole organism) | D. melanogaster      | DJ694                           |                                     | PMID:12882353      |                      | BDSC:8176   |                                 |          |
| recombinant DNA reagent             | NA                   | pTub-GAL80                      |                                     | PMID:10197526      |                      |             |                                 |          |
| recombinant DNA reagent             | NA                   | pDJ136                          |                                     | this paper         |                      |             | Progenitors: PCR, pTub-GAL80    |          |
| recombinant DNA reagent             | NA                   | pJY2000                         |                                     | PMID:11404007      |                      |             |                                 |          |
| recombinant DNA reagent             | NA                   | pDJ138                          |                                     | this paper         |                      |             | Progenitors: pDJ136; pJY2000    |          |
| recombinant DNA reagent             | NA                   | pDJ139                          |                                     | this paper         |                      |             | Progenitors: pDJ136; linker     |          |
| recombinant DNA reagent             | NA                   | pDJ140                          |                                     | this paper         |                      |             | Progenitors: pTub-GAL80; pDJ139 |          |
| recombinant DNA reagent             | NA                   | pMS12                           |                                     | PMID:11404007      |                      |             |                                 |          |
| recombinant DNA reagent             | NA                   | pDJ143                          |                                     | this paper         |                      |             | Progenitors: pMS12; pDJ140      |          |
| recombinant DNA reagent             | NA                   | pDJ146                          |                                     | this paper         |                      |             | Progenitors: pDJ143; pDJ138     |          |
| recombinant DNA reagent             | NA                   | pDJ141                          |                                     | this paper         |                      |             | Progenitors: pMS12; pDJ139      |          |
| recombinant DNA reagent             | NA                   | pDJ144                          |                                     | this paper         |                      |             | Progenitors: pMS12; pDJ140      |          |
| recombinant DNA reagent             | NA                   | pDJ158                          |                                     | this paper         |                      |             | Progenitors: pDJ138             |          |
| recombinant DNA reagent             | NA                   | pDJ159                          |                                     | this paper         |                      |             | Progenitors: pDJ158; adapter    |          |
| recombinant DNA reagent             | NA                   | pDJ160                          |                                     | this paper         |                      |             | Progenitors: pDJ144; adapter    |          |
| recombinant DNA reagent             | NA                   | pDJ147                          |                                     | this paper         |                      |             | Progenitors: pDJ160; pDJ159     |          |
